# Supplementary material for: The activating capture of N2 at the active site of Mo–nitrogenase
Source: Royal Society of Chemistry journal article supplement (doi:10.1039/d4dt01866d), 2024-01-01
Supplement: d4dt01866d1.pdf [file d4dt01866d1.pdf]

# The activating capture of N<sub>2</sub> at the active site of Mo-nitrogenase.

Ian Dance

School of Chemistry, UNSW Sydney, NSW 2052 Australia

i.dance@unsw.edu.au

## Supplementary Information

### Contents

1. Protein model
2. Computational constraints
3. Density functional procedures
4. Validation
5. Determination of transition states
6. Movement of Val70 and the contiguous chain

### 1. Protein model

The quantum computed protein model is an extract from crystal 3U7Q, shown in Figure S1. The six principal chains surrounding FeMo-co are highlighted with different colours, and the connecting hydrogen bonds are marked. Homocitrate, the His442 ligation of Mo, and relevant nearby water molecules are included (485 atoms total). Details, and the rationale for inclusion of amino acids and for truncation of uninvolved sidechains, are provided in the caption for Figure S1. Investigations of the protonation state of homocitrate using crystal structures at various pH (summarised in ref <sup>1</sup>), vibrational circular dichroism spectroscopy,<sup>2</sup> QM/MM calculations,<sup>1, 3</sup> and quantum refinement,<sup>3</sup> indicate that the coordinated alcoholate O7 atom is protonated, and hydrogen bonded to O1. This proton is now included in the model, although it is not shown in Figure S1.

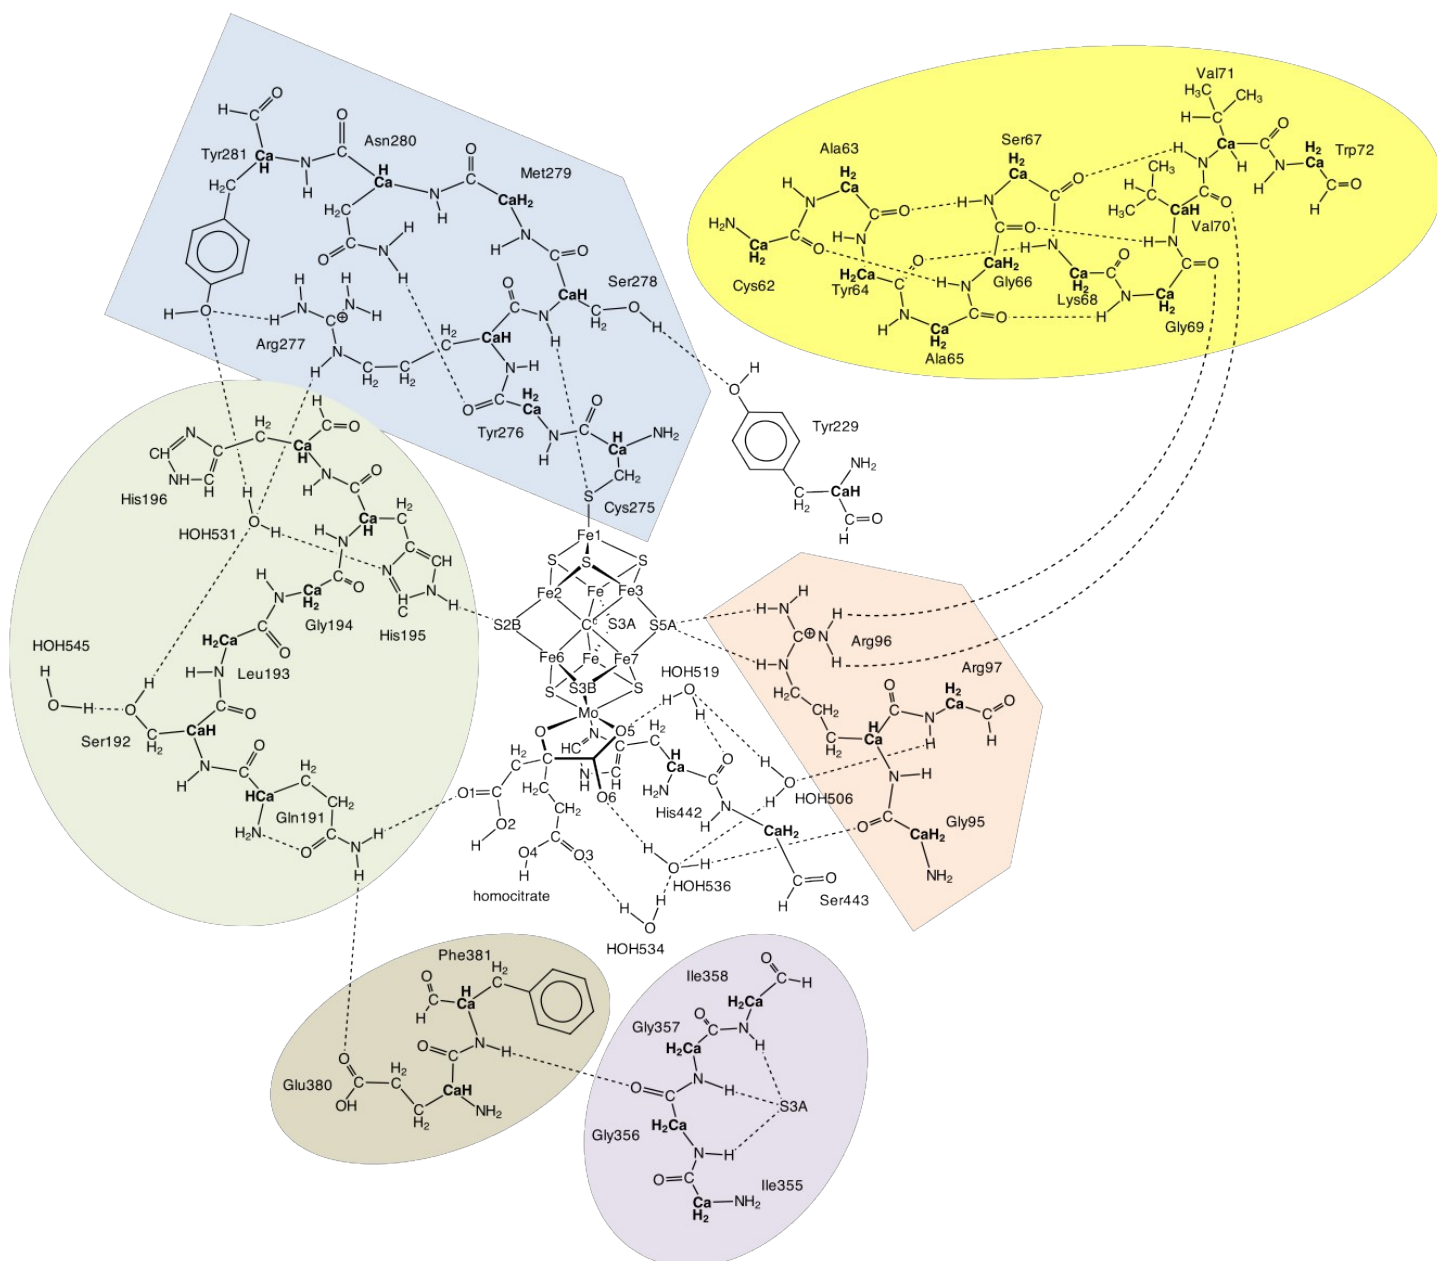

Figure S1. The quantum computed model, with residues and water molecules labelled according to *Azotobacter vinelandii* protein, crystal structure 3U7Q. Ca are labelled as Ca, and hydrogen bonds are broken lines. Non-influential sidechains are truncated to gly. In the ‘front’ chain (yellow highlight) that extends over the Fe2Fe3Fe6Fe7 face of FeMo-co the crucial residues Val70 and Val71 are complete, while 62, 63, 64, 65, 67, 68 and 72 are modelled as Gly. In the 191 to 196 chain (highlight green) the significant sidechains of Gln191, Ser193, His195 and His196 are complete. In the 275-281 chain (blue highlight) Cys275, Arg277, Ser278, Asn280, Tyr281 near the N<sub>2</sub> pathway are complete: Tyr229 is included in full because it borders the reaction domain and has an important hydrogen bond with Ser278. In chain 95-97 (salmon highlight) the sidechain of Arg96 is included because it forms crucial hydrogen bonds with S5A, Gly69 and Val70: the sidechain of Arg97 is not nearby and is truncated to gly. In the rear chain (mauve highlight) with hydrogen bonds to S5A, Ile355 and Ile358 are truncated to gly. Glu380 and Phe381 (fawn highlight) are included in full. Ligand His442 is complete and Ser443 is truncated to gly. Homocitrate is complete. HOH531 has hydrogen bonds with two chains, Ser192, His195 and Arg277, Tyr281, and is part of the putative proton transfer from surface water (HOH545) to His195.<sup>4</sup> The four penultimate waters of the proton wire<sup>5</sup> (HOH519, HOH506, HOH536 and HOH534) are included. A proton on the coordinated alcoholate O atom of homocitrate is not shown in Figure S1.

Experimental and computational studies are in general agreement that the redox level of the [CFe<sub>7</sub>MoS<sub>9</sub>] core of resting FeMo-co cluster is described by net charge -1,<sup>1, 6-8</sup> and so the net charge for the complete model in Figure S1 is -2 (-1 when the His195 side chain is protonated).

## 2. Computational constraints

Some constraints on the protein structure are required during optimization calculations because the modelled protein is incomplete and the bonding and dispersion influences of the complete protein outside the computational model are absent. The modelled protein must also maintain flexibility sufficient to accommodate the coordination of N<sub>2</sub> and of H<sub>2</sub>, and the diffusion of these molecules to and from FeMo-co. The constraints used here involved the C $\alpha$  atoms at the ends of the modelled protein chains, allowing movement of the intermediate residues and all sidechains. The constraints maintained the crystallographic distances between C<sup>c</sup> at the centre of FeMo-co and the C $\alpha$  atoms of residues 62, 95, 97, 191, 196, 229, 281, 355, 358, 380, 381, 443, and C<sup>c</sup>-O distances for the included water molecules. The lengths of the hydrogen bonds between the backside water HOH531 and Arg277, Tyr281 and Ser192 (Figure S1) were also constrained.

As previously explained<sup>9</sup> trial calculations on the modes of diffusion and coordination of N<sub>2</sub> / H<sub>2</sub> led to the conclusion that the front chain near Val70 should move about 1 Å away from FeMo-co. This is consistent with experimental data on mutation of amino acid 70 with smaller and larger side chains.<sup>10-12</sup> Accordingly the C $\alpha$ (Val70) -- C<sup>c</sup> distance was constrained to 8.2 Å and the C $\alpha$ (Val70) -- CZ(Arg96) distance to 4.7 Å, longer than the crystal distances by 1 Å and 0.7 Å respectively.

There were no constraints on bond distances or bond angles, including during transition state searches.

This overall strategy for constraints provides a computationally stable model, able to adjust to non-bonding dispersion interactions in the vicinity of the active site.

## 3. Density functional procedures

Density functional (DF) calculations use the DMol methodology of Delley,<sup>13-18</sup> with accurate DNP (double numerical plus polarisation) basis sets.<sup>16</sup> The real-space cutoff in the calculation of atomic basis sets was 9 au (4.8 Å), which gives results within 0.1% of the limit for larger extensions of the basis sets. The gradient-corrected functional PBE<sup>19</sup> was used because validation tests demonstrate that when used with the numerical basis sets of DMol it is more accurate than other commonly used functionals.<sup>20</sup> See section 4 Validation, below.

The DMol method uses numerical solutions of DFT for free atoms as part of its basis set, and thus gives highly accurate DFT solutions for the separated atoms limit.<sup>16</sup> These numerical basis sets avoid the need for basis set superposition corrections, and provide reliable energies at long intermolecular distances. This advantage of the DMol methodology obviates the need for empirical treatment<sup>21</sup> of the long-range dispersion energies that are involved when the computational model is comprised of separate molecular units. This ability of the DMol methodology to incorporate long-range dispersion has been well demonstrated. Zhang *et al* reported the excellent agreement between the experimental interatomic potential energy curves and the DMol/PBE calculated potential energy curves for the inert-gas pairs He<sub>2</sub>, Ne<sub>2</sub>, Ar<sub>2</sub>, HeNe, HeAr and NeAr.<sup>22</sup> Todorova and Delley used this DMol / DNP / PBE methodology to optimize the crystal structures of a comprehensive set over 40 molecular crystals in which dispersion and intermolecular interactions determine the crystal packing and crystal lattice parameters.<sup>18</sup> This set of molecular crystals ranged over amino acids, aliphatic and aromatic hydrocarbons, ice, H<sub>2</sub>S, S<sub>8</sub>, C<sub>60</sub>, and the inert gases Ne, Ar, Kr and Xe. The PBE functional overestimates lattice parameters by about 4%, while the PBE<sub>sol</sub> functional yields lattice parameters with an average systematic error of less than 1%. Todorova and Delley emphasise that the DMol numerical basis sets have low BSSE because of the accurate tails of the molecular orbitals.

The calculations were all-electron, spin-unrestricted, with no imposed symmetry. The conductor-like screening model (COSMO)<sup>23-25</sup> was used with a dielectric constant of 5. Constraints on interatomic distances used the Lagrange Multiplier Algorithm. Control of electronic states was via the input spin

populations for Fe1, Fe3, Fe4, Fe5 and Fe7. Output spin populations are calculated by the Mulliken method.<sup>26</sup>

#### 4. Validation

Table S1 contains the results of calculations of the resting state of FeMo-co using the full protein model (482 atoms) and the computational methodology of this paper. The basis set is DNP, functional PBE, spin  $S=3/2$ , electronic state 235 (ie Fe2, Fe3 and Fe5 have negative spin densities). Results are for unprotonated and protonated His195. Calculated bonded and non-bonded distances are compared with the best crystallographic values, from PDB 3U7Q. The agreement between calculated and experimental lengths for C<sup>c</sup>-Fe bonds and for Fe-S bonds is 0.01Å or better. The overall average deviation is 0.02Å. The longer distance between N $\epsilon$  of His195 and S2B, an interaction which may or may not be hydrogen bonded in the crystal structure, is calculated to be 0.12 Å longer with unprotonated His195 and 0.06Å shorter with His195 protonated at N $\epsilon$ .

**Table S1.** Calculated distances, bonded and non-bonded, for the resting state of FeMo-co, for unprotonated and protonated forms of His195, in comparison with the crystallographic distances (PDB 3U7Q). Basis set DNP, functional PBE,  $S=3/2$ , electronic state 235. Cc is the C atom at the centre of FeMo-co.

| distance | xtl 3U7Q | calculated with His195 unprotonated | calc - xtl    | calculated with Hs195 protonated | calc - xtl    |
|----------|----------|-------------------------------------|---------------|----------------------------------|---------------|
| Cc-Fe2   | 1.997    | 1.945                               | <b>-0.052</b> | 1.962                            | <b>-0.036</b> |
| Cc-Fe3   | 1.984    | 1.982                               | <b>-0.001</b> | 1.982                            | <b>-0.002</b> |
| Cc-Fe4   | 1.990    | 2.005                               | <b>0.015</b>  | 1.995                            | <b>0.004</b>  |
| Cc-Fe5   | 2.008    | 2.045                               | <b>0.036</b>  | 2.023                            | <b>0.015</b>  |
| Cc-Fe6   | 2.018    | 1.969                               | <b>-0.049</b> | 2.009                            | <b>-0.009</b> |
| Cc-Fe7   | 1.997    | 2.011                               | <b>0.014</b>  | 1.998                            | <b>0.000</b>  |
| Fe1-Fe2  | 2.668    | 2.673                               | <b>0.005</b>  | 2.671                            | <b>0.003</b>  |
| Fe1-Fe3  | 2.668    | 2.653                               | <b>-0.015</b> | 2.652                            | <b>-0.015</b> |
| Fe1-Fe4  | 2.655    | 2.681                               | <b>0.027</b>  | 2.687                            | <b>0.032</b>  |
| Fe2-Fe6  | 2.576    | 2.630                               | <b>0.054</b>  | 2.643                            | <b>0.067</b>  |
| Fe3-Fe7  | 2.583    | 2.603                               | <b>0.021</b>  | 2.606                            | <b>0.024</b>  |
| Fe4-Fe5  | 2.612    | 2.573                               | <b>-0.039</b> | 2.555                            | <b>-0.057</b> |
| Mo-Fe5   | 2.727    | 2.733                               | <b>0.006</b>  | 2.731                            | <b>0.004</b>  |
| Mo-Fe6   | 2.674    | 2.717                               | <b>0.044</b>  | 2.730                            | <b>0.056</b>  |
| Mo-Fe7   | 2.681    | 2.679                               | <b>-0.002</b> | 2.687                            | <b>0.006</b>  |
| Fe2-S1A  | 2.261    | 2.257                               | <b>-0.004</b> | 2.252                            | <b>-0.009</b> |
| Fe2-S2A  | 2.254    | 2.291                               | <b>0.037</b>  | 2.296                            | <b>0.042</b>  |
| Fe3-S2A  | 2.275    | 2.285                               | <b>0.010</b>  | 2.288                            | <b>0.013</b>  |
| Fe3-S4A  | 2.254    | 2.233                               | <b>-0.021</b> | 2.228                            | <b>-0.026</b> |
| Fe2-S2B  | 2.206    | 2.178                               | <b>-0.028</b> | 2.219                            | <b>0.013</b>  |
| Fe3-S5A  | 2.221    | 2.236                               | <b>0.015</b>  | 2.226                            | <b>0.005</b>  |
| Fe6-S2B  | 2.173    | 2.160                               | <b>-0.013</b> | 2.219                            | <b>0.047</b>  |
| Fe7-S5A  | 2.210    | 2.209                               | <b>0.000</b>  | 2.199                            | <b>-0.011</b> |
| Fe6-S1B  | 2.235    | 2.226                               | <b>-0.008</b> | 2.234                            | <b>0.000</b>  |
| Fe6-S3B  | 2.218    | 2.238                               | <b>0.020</b>  | 2.250                            | <b>0.032</b>  |

|                          |       |       |               |       |               |
|--------------------------|-------|-------|---------------|-------|---------------|
| Fe7-S3B                  | 2.245 | 2.254 | <b>0.009</b>  | 2.252 | <b>0.007</b>  |
| Fe7-S4B                  | 2.220 | 2.228 | <b>0.009</b>  | 2.222 | <b>0.002</b>  |
| <b>average deviation</b> |       |       | <b>0.020</b>  |       | <b>0.020</b>  |
| HisN-S2B                 | 3.216 | 3.341 | <b>0.125</b>  | 3.153 | <b>-0.063</b> |
| mean Fe--Fe              | 2.627 | 2.636 | <b>0.009</b>  | 2.636 | <b>0.009</b>  |
| mean Fe-S                | 2.231 | 2.233 | <b>0.002</b>  | 2.240 | <b>0.010</b>  |
| mean Fe--Mo              | 2.694 | 2.710 | <b>0.016</b>  | 2.716 | <b>0.022</b>  |
| mean Cc-Fe               | 1.999 | 1.993 | <b>-0.006</b> | 1.995 | <b>-0.004</b> |

Thorhallsson et al consider that agreement with the dimensions of the crystal structure is essential for gauging the quality of the computational protocols.<sup>27</sup> Raugei et al<sup>28</sup> also present comparative results on the accuracy of the PBE functional to reproduce nearest neighbour Fe-Fe distances in resting FeMo-co.

The PBE/DMol method reproduces experimental enthalpy data on the binding of N<sub>2</sub>. Relevant  $\Delta H_{\text{exp}} / \Delta H_{\text{calc}}$  comparisons from ref<sup>20</sup> are (kcal mol<sup>-1</sup>) (a) exp 17.6, calc 20.0, 18.8 (b) exp ~10, calc 10.2 (c) exp 22.8, calc 25.9. Other assessments of DMol accuracy vs experiment have examined the electron affinities of atoms and molecules,<sup>29</sup> the enthalpies of formation for small (<100 electrons) molecular and atomic species,<sup>30</sup> the structures of metal-sulfide clusters,<sup>31</sup> photo-induced conversion of [Os(NH<sub>3</sub>)<sub>5</sub>( $\eta^1$ -N<sub>2</sub>)<sup>2+</sup> to [Os(NH<sub>3</sub>)<sub>5</sub>( $\eta^2$ -N<sub>2</sub>)<sup>2+</sup> (i.e. end-on to side-on bonding of N<sub>2</sub>),<sup>32</sup> the geometry and vibrational frequencies of [(NH<sub>3</sub>)<sub>5</sub>Ru(pyrazine)Ru(NH<sub>3</sub>)<sub>5</sub>]<sup>4+,5+,6+</sup>,<sup>33</sup> and protonation reactions involving hydrogen bonding.<sup>4</sup>

See ref<sup>20</sup> for further validation results relevant to the present work, including Fe<sub>x</sub>H<sub>y</sub> clusters, and hydrogen bonding by water.

## 5. Determination of transition states

The following pragmatic procedure is used to map reaction energy surfaces and locate transition states.<sup>5, 8, 34, 35</sup> A chemically reasonable geometry between energy minima is evaluated by observing the directions and extent of geometry change during an energy minimisation calculation that is restricted to small (ca 0.03 Å) atom displacements at each cycle. This reveals significant geometrical variables (i.e. which atoms are moving, which bond distances and angles are changing) and also the energy gradients involved. This calculation also indicates the direction of the energy saddle relative the 'reactant' and 'product' minima. Then, as illustrated in Figure S2, a point **Δ1** that is a short distance along this first optimization path is selected, and from this structure an atomic arrangement (**2** on Figure S2) on the other side of the saddle is found (by trial and error and chemical experience) and similarly evaluated with small-displacement energy minimisation steps. A point **Δ2** along the second optimisation path is selected, and from this the key moving atoms are adjusted to be just back across the suspected saddle-point towards the 'reactant' state. Repetition of this cycle, with subsequent short small-step energy minimisations, always starting from a point just on the other side of the barrier, allows the barrier to be straddled from opposing trial positions that progressively approach each other in geometry and energy, and converge at the transition state (TS). Confirmation of the TS is obtained by following the complete trajectory of geometries from positions nudged just away from the TS, linking the TS with the connected reactant and product energy minima on the same potential energy surface. The protocol uses human participation, which is itself insightful, and with chemical experience the procedure works efficiently.

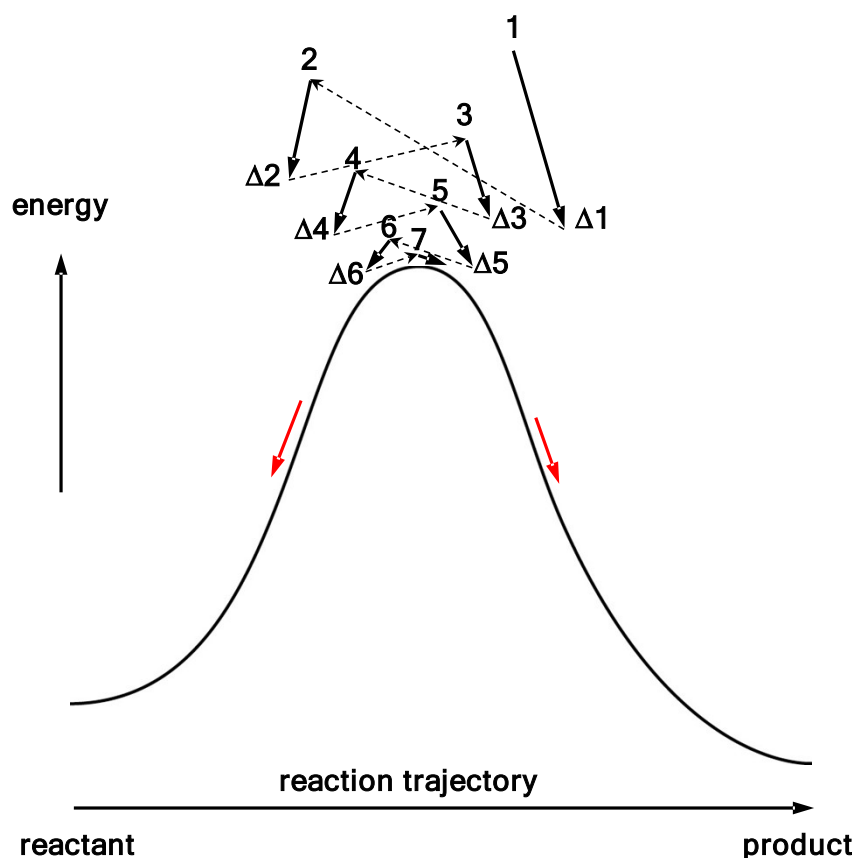

Figure S2. Generalised diagram of the procedure for locating a reaction transition state. The solid arrows represent the course of limited small-step energy reductions from the numbered positions, which are generated (broken arrows) from  $\Delta$  positions partway along the previous energy reduction, chosen according to geometry and energy gradient. The postulated trials necessarily oscillate across the barrier, and therefore optimise all other variables and decrease the energy and gradient while approaching the top of the barrier. Confirmation that the transition state, reactant and product are on the same potential energy surface is obtained by complete energy minimisations (red arrows).

## 6. Movement of Val70 and the contiguous chain

Previous calculations have revealed some steric interference between diffusing  $N_2$  in the Fe2--Fe6 reaction zone and the immediately contiguous protein (mainly the side chain of Val70) in its resting position.<sup>9, 36</sup> This is consistent with experimental data on mutation of residue 70 to larger side chains.<sup>11, 12</sup> Therefore I postulated that the protein dynamics can accommodate and incorporate movement of Val70 and adjacent residues away from FeMo-co.<sup>9</sup> Figure S3 shows the relevant protein structure. The side chain of Val70 that protrudes towards Fe2 and Fe6 at Fe--C distances of 4.4Å extends from an  $\alpha$ - and  $\pi$ -helical chain. This chain loops back along the opposite side of the helix, where it forms  $\beta$ -sheet with a later section of the chain. The helical section engages three hydrogen bonds (Figure S3 (a)), of which Ser67  $\rightarrow$  Gln151 is most relevant because it is almost opposite Val70. Figure S3 (b) shows how the helical section of the chain can rotate and slide slightly to increase the Val70 - Fe separations without disrupting this hydrogen bond. Qualitative manipulation of this protein assemblage confirmed that the  $C\alpha(\text{Val70})\text{-}C^c$  and  $C\alpha(\text{Trp72})\text{-}C^c$  distances in the constrained expanded model could be attained. Obviously analysis of the dynamics of the complete protein is required to explore and quantitate the protein dynamics that would increase the space between Fe2, Fe6 and Val70. The sidechain of Arg96 with possible hydrogen bonds to the mainchain at Gly69 and Val70 is also significant in this domain.

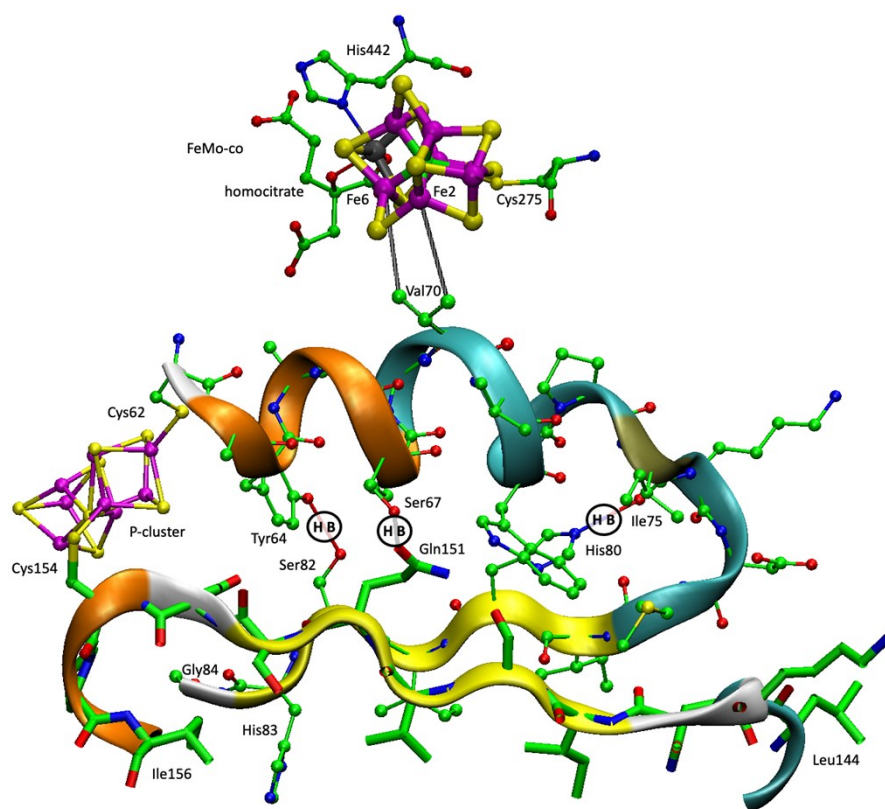

(a)

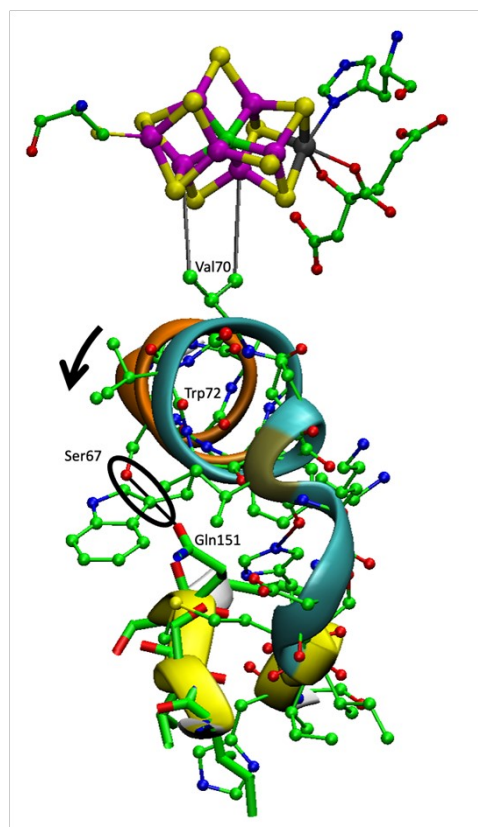

(b)



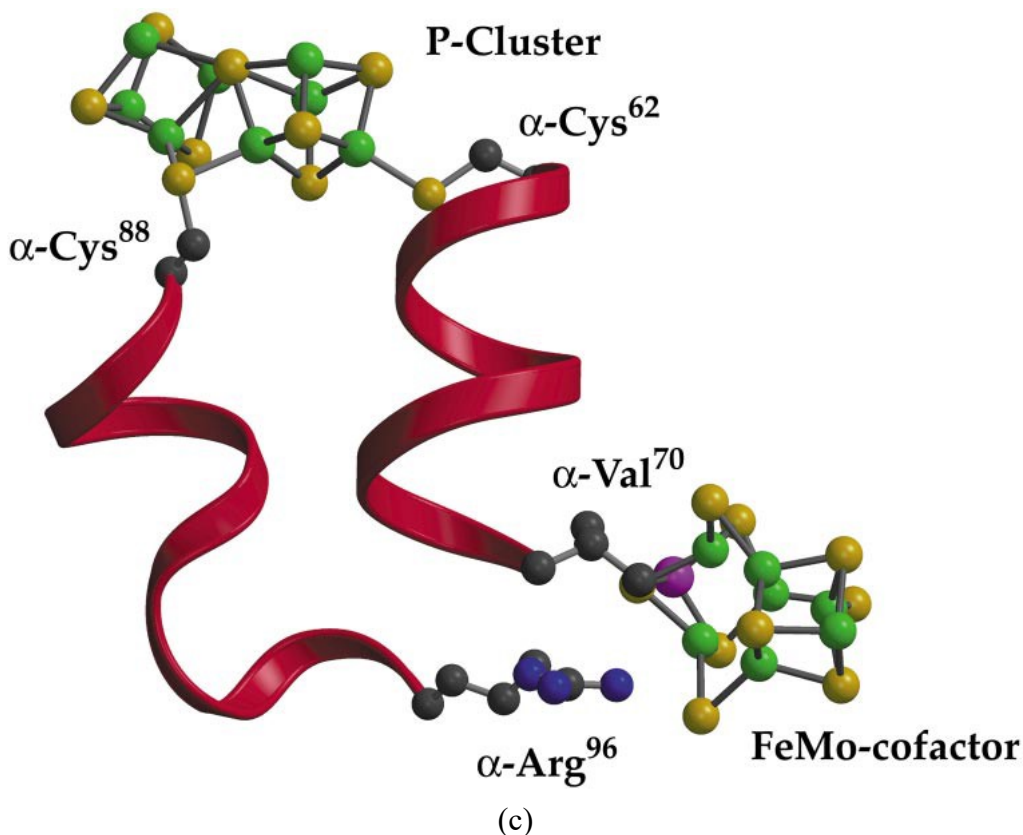

Figure S3. (a) Structure of the protein containing Val70, adjacent to the Fe<sub>2,3,6,7</sub> face of FeMo-co (from crystal PDB 3U7Q, all residues are in the a chain). The grey lines identify the approaches (C-Fe 4.37, 4.44Å) of the side chain methyl groups of Val70 to Fe2 and Fe6 of FeMo-co. Two relevant sections of the protein chain are drawn, with secondary structure superimposed as ribbons. The closest section of the chain, containing Val70, is drawn with thin bonds and spherical atoms and extends from Cys62 (a ligand of the P-cluster) to Gly84. A more distant part of the chain, drawn with thick bonds, is from Leu144 to Cys154 (P-cluster ligand). Both sections are part of a  $\beta$ -sheet (yellow ribbons). The  $\alpha$ -helical section of the closest chain (residues 63-68, orange ribbon) changes to  $\pi$ -turn (cyan ribbon) through Val70, before looping back to the  $\beta$ -sheet. There are three hydrogen bonds (labelled HB) involving the closest section of chain, and only one of these (Ser67  $\rightarrow$  Gln151) connects the two sections of chain. (b) End view of (a), showing how the closest section of chain containing Val70 is located between FeMo-co and the distant section of chain containing Gln151. The large black arrow depicts the slight rotation and displacement of the section containing Val70 and Trp72 that can move them away from FeMo-co, without disrupting the Ser67  $\rightarrow$  Gln151 hydrogen bond. (c) Peptide chain connections between Val70 and Arg96 around FeMo-co and two Cys ligands of the P-cluster. From Ref <sup>37</sup>.

## References

1. B. Benediktsson and R. Bjornsson, QM/MM Study of the Nitrogenase MoFe Protein Resting State: Broken-Symmetry States, Protonation States, and QM Region Convergence in the FeMoco Active Site, *Inorganic Chemistry*, 2017, 56, 13417-13429.
2. L. Deng, H. Wang, C. H. Dapper, W. E. Newton, S. Shilov, S. Wang, S. P. Cramer and Z.-H. Zhou, Assignment of protonated R-homocitrate in extracted FeMo-cofactor of nitrogenase via vibrational circular dichroism spectroscopy, *Communications Chemistry*, 2020, 3, 145.
3. L. Cao, O. Caldararu and U. Ryde, Protonation States of Homocitrate and Nearby Residues in Nitrogenase Studied by Computational Methods and Quantum Refinement, *The Journal of Physical Chemistry B*, 2017, 121, 8242-8262.



4. I. Dance, New insights into the reaction capabilities of His195 adjacent to the active site of nitrogenase, *Journal of Inorganic Biochemistry*, 2017, 169, 32-43.
5. I. Dance, The pathway for serial proton supply to the active site of nitrogenase: enhanced density functional modeling of the Grothuss mechanism, *Dalton Transactions*, 2015, 44, 18167-18186.
6. T. Spatzal, J. Schlesier, E.-M. Burger, D. Sippel, L. Zhang, S. L. A. Andrade, D. C. Rees and O. Einsle, Nitrogenase FeMoco investigated by spatially resolved anomalous dispersion refinement, *Nat Commun*, 2016, 7, 10902.
7. R. Bjornsson, F. Neese and S. DeBeer, Revisiting the Mössbauer Isomer Shifts of the FeMoco Cluster of Nitrogenase and the Cofactor Charge, *Inorganic Chemistry*, 2017, 56, 1470-1477.
8. I. Dance, Computational Investigations of the Chemical Mechanism of the Enzyme Nitrogenase, *ChemBiochem*, 2020, 21, 1671-1709.
9. I. Dance, Structures and reaction dynamics of N<sub>2</sub> and H<sub>2</sub> binding at FeMo-co, the active site of nitrogenase, *Dalton Transactions*, 2021, 50, 18212-18237.
10. P. C. Dos Santos, R. Igarashi, H.-I. Lee, B. M. Hoffman, L. C. Seefeldt and D. R. Dean, Substrate Interactions with the Nitrogenase Active Site, *Acc. Chem. Res.*, 2005, 38, 208-214.
11. L. C. Seefeldt, B. M. Hoffman and D. R. Dean, Mechanism of Mo-Dependent Nitrogenase, *Annu. Rev. Biochem.*, 2009, 78, 701-722.
12. R. Sarma, B. M. Barney, S. Keable, D. R. Dean, L. C. Seefeldt and J. W. Peters, Insights into substrate binding at FeMo-cofactor in nitrogenase from the structure of an a-70Ile MoFe protein variant, *J. Inorg. Biochem.*, 2010, 104, 385-389.
13. B. Delley, An all-electron numerical method for solving the local density functional for polyatomic molecules, *J. Chem. Phys.*, 1990, 92, 508-517.
14. B. Delley, in *Modern density functional theory: a tool for chemistry*, eds. J. M. Seminario and P. Politzer, Elsevier, Amsterdam, 1995, vol. 2, pp. 221-254.
15. J. Baker, A. Kessi and B. Delley, The generation and use of delocalized internal coordinates in geometry optimization, *The Journal of Chemical Physics*, 1996, 105, 192-212.
16. B. Delley, From molecules to solids with the DMol3 approach, *J. Chem. Phys.*, 2000, 113, 7756-7764.
17. J. Andzelm, R. D. King-Smith and G. Fitzgerald, Geometry optimization of solids using delocalized internal coordinates, *Chemical Physics Letters*, 2001, 335, 321-326.
18. T. Todorova and B. Delley, Molecular Crystals: A Test System for Weak Bonding<sup>†</sup>, *The Journal of Physical Chemistry C*, 2010, 114, 20523-20530.
19. J. P. Perdew, K. Burke and M. Ernzerhof, Generalized Gradient Approximation Made Simple, *Phys. Rev. Lett.*, 1996, 77, 3865-3868.
20. I. Dance, Evaluations of the Accuracies of DMol3 Density Functionals for Calculations of Experimental Binding Enthalpies of N<sub>2</sub>, CO, H<sub>2</sub>, C<sub>2</sub>H<sub>2</sub> at Catalytic Metal Sites *Molecular Simulation*, 2018, 44, 568-581.
21. S. Grimme, Semiempirical GGA-Type Density Functional Constructed with a Long-Range Dispersion Correction, *J. Comput. Chem.*, 2006, 27, 1787-1799.
22. Y. Zhang, W. Pan and W. Yang, Describing van der Waals Interaction in diatomic molecules with generalized gradient approximations: The role of the exchange functional, *J. Chem. Phys.*, 1997, 107, 7921-7925.
23. J. Andzelm, C. Kolmel and A. Klamt, Incorporation of solvent effects into density functional calculations of molecular energies and geometries, *J. Chem. Phys.*, 1995, 103, 9312-9320.
24. A. Klamt, V. Jonas, T. Burger and J. C. W. Lohrenz, Refinement and Parametrization of COSMO-RS, *J. Phys. Chem. A*, 1998, 102, 5074-5085.
25. B. Delley, The conductor-like screening model for polymers and surfaces, *Molecular Simulation*, 2006, 32, 117-123.

26. R. S. Mulliken, Electronic population analysis on LCAO-MO molecular wavefunctions. II. Overlap populations, bond orders, and covalent bond energies, *J. Chem. Phys.*, 1955, 23, 1833-1846.
27. A. T. Thorhallsson, B. Benediktsson and R. Bjornsson, A model for dinitrogen binding in the E4 state of nitrogenase, *Chemical Science*, 2019, 10, 11110-11124.
28. S. Raugei, L. C. Seefeldt and B. M. Hoffman, Critical computational analysis illuminates the reductive-elimination mechanism that activates nitrogenase for N<sub>2</sub> reduction, *Proc Natl Acad Sci U S A*, 2018, 115, E10521-E10530.
29. M. Meunier, N. Quirke and D. Binesti, The calculation of the electron affinity of atoms and molecules, *Molec. Simulation*, 1999, 23, 109-125.
30. B. Delley, Ground-State Enthalpies: Evaluation of Electronic Structure Approaches with Emphasis on the Density Functional Method, *The Journal of Physical Chemistry A*, 2006, 110, 13632-13639.
31. I. Dance, Understanding structure and reactivity of new fundamental inorganic molecules: metal sulfides, metallocarbohedrenes, and nitrogenase., *J. Chem. Soc., Chem. Commun.*, 1998, 523-530.
32. D. Schaniel, T. Wolke, B. Delley, C. Boskovic and H. U. Gudel, Photogeneration of metastable side-on N<sub>2</sub> linkage isomers in [Ru(NH<sub>3</sub>)<sub>5</sub>N<sub>2</sub>]Cl<sub>2</sub>, [Ru(NH<sub>3</sub>)<sub>5</sub>N<sub>2</sub>]Br<sub>2</sub> and [Os(NH<sub>3</sub>)<sub>5</sub>N<sub>2</sub>]Cl<sub>2</sub>, *Phys. Chem. Chem. Phys.*, 2008, 10, 5531-5538.
33. T. Todorova and B. Delley, The Creutz–Taube Complex Revisited: DFT Study of the Infrared Frequencies, *Inorganic Chemistry*, 2008, 47, 11269-11277.
34. I. Dance, A pragmatic method for location of transition states and calculation of reaction paths., *Molecular Simulation*, 2008, 34, 923-929.
35. I. Dance, A pragmatic method for location of transition states and calculation of reaction paths: erratum., *Molecular Simulation*, 2011, 37, 257.
36. I. Dance, The binding of reducible N<sub>2</sub> in the reaction domain of nitrogenase, *Dalton Transactions*, 2023, 52, 2013-2026.
37. J. Christiansen, D. R. Dean and L. C. Seefeldt, Mechanistic features of the Mo-containing nitrogenase, *Annu. Rev. Plant Physiol. Plant Mol. Biol.*, 2001, 52, 269-295.

## Coordinates

Translation of Fe numbering

Fe1 = Fe143  
 Fe2 = Fe140  
 Fe3 = Fe141  
 Fe4 = Fe142  
 Fe5 = Fe139  
 Fe6 = Fe145  
 Fe7 = Fe144

## N<sub>2</sub>-ready-b to Fe<sub>2</sub>-NH-NH-b

Figure 8, scheme A

| structure, S<br>spin densities                | filename<br>coordinates                  |
|-----------------------------------------------|------------------------------------------|
| reactant <b>N<sub>2</sub>-ready-b</b> (S=3/2) | <b>bm52exp335fe2captgfcc_3_53279.75</b>  |
| Fe( 139) -2.160                               | C1 -7.743059129 -5.371461377 1.284427864 |
| Fe( 140) -0.780                               | C2 -8.133275354 -6.516148670 0.341551306 |
| Fe( 141) -2.516                               | C3 -8.558870076 -3.443578655 2.569954210 |
| Fe( 142) 2.833                                | C4 -7.921118997 -3.704146315 3.930900564 |
| Fe( 143) 2.642                                | C5 -7.490425080 -5.295633855 5.738135417 |
|                                               | C6 -5.965589326 -5.415346506 5.670442014 |
|                                               | C7 -3.991998645 -5.721476590 4.275258441 |
|                                               | C8 -3.474336594 -4.281928472 4.314199205 |

|          |       |     |               |               |              |
|----------|-------|-----|---------------|---------------|--------------|
| Fe( 144) | 1.302 | C9  | -3.887657664  | -1.959217976  | 3.622666474  |
| Fe( 145) | 1.630 | C10 | -3.904029576  | -1.331800140  | 5.025457137  |
|          |       | C11 | -4.926689473  | -1.171643357  | 7.203993622  |
|          |       | C12 | -3.861563285  | -1.724985405  | 8.162293119  |
|          |       | C13 | -2.858435722  | -3.741857868  | 9.137476902  |
|          |       | C14 | -1.389974937  | -4.054659511  | 8.815113152  |
|          |       | C15 | 0.243455989   | -4.790410687  | 7.124784822  |
|          |       | C16 | 0.983385936   | -3.646537888  | 6.421643713  |
|          |       | C17 | 0.652725362   | -1.402989197  | 5.396346367  |
|          |       | C18 | 0.781020264   | -0.187061587  | 6.329758838  |
|          |       | C19 | -0.251387846  | -1.194058385  | 4.164411842  |
|          |       | C20 | 0.011494495   | 0.148584187   | 3.470942003  |
|          |       | C21 | -0.139087266  | -2.405957125  | 3.230137207  |
|          |       | C22 | -0.360154154  | 1.560090019   | 7.623554997  |
|          |       | C23 | 0.003514966   | 1.232421140   | 9.083103656  |
|          |       | C24 | -1.690218736  | 2.339174693   | 7.486656056  |
|          |       | C25 | -1.758917572  | 3.505562199   | 8.478134594  |
|          |       | C26 | -1.868703291  | 2.849813796   | 6.050047427  |
|          |       | C27 | -0.409005622  | -0.092354400  | 11.069799295 |
|          |       | C28 | 1.055793641   | -0.363047230  | 11.350500077 |
|          |       | C29 | 5.897340558   | -11.606417796 | 3.746233093  |
|          |       | C30 | 6.516226970   | -10.327569929 | 3.191238644  |
|          |       | C31 | 6.791423123   | -7.902624677  | 3.682768739  |
|          |       | C32 | 8.014172886   | -7.509569494  | 4.531631968  |
|          |       | C33 | 5.614226420   | -6.943658293  | 3.923619263  |
|          |       | C34 | 5.949508455   | -5.502360497  | 3.549593513  |
|          |       | C35 | 4.704893734   | -4.620189086  | 3.493436662  |
|          |       | C36 | 4.893408390   | -2.117065688  | 3.499847812  |
|          |       | C37 | 10.270470882  | -6.554698756  | 4.479339838  |
|          |       | C38 | 10.487611284  | -5.058678544  | 4.467684203  |
|          |       | C39 | -5.342235221  | -2.679892597  | -1.565034667 |
|          |       | C40 | -5.701337621  | -1.244891435  | -1.132130336 |
|          |       | C41 | -3.803886228  | -2.823939858  | -1.504065166 |
|          |       | C42 | -3.249686898  | -4.258648120  | -1.622388266 |
|          |       | C43 | -2.980721266  | -4.743636866  | -3.047855480 |
|          |       | C44 | -6.182411703  | 0.995878566   | -2.038426520 |
|          |       | C45 | -7.270327367  | 1.454437724   | -1.056536885 |
|          |       | C46 | -6.358198335  | 1.604980237   | -3.435069927 |
|          |       | C47 | -9.424992457  | 0.935927543   | -0.008886384 |
|          |       | C48 | -9.027107060  | 0.953684046   | 1.470247728  |
|          |       | C49 | -7.322210635  | 0.436324756   | 3.152041921  |
|          |       | C50 | -6.152242814  | 1.398363420   | 3.364939958  |
|          |       | C51 | -4.606179651  | 3.048138071   | 2.434073319  |
|          |       | C52 | -5.047157213  | 4.357013250   | 3.131061879  |
|          |       | C53 | -4.020417954  | 3.483157920   | 1.082104493  |
|          |       | C54 | -3.401268860  | 2.421814514   | 0.236365816  |
|          |       | C55 | -2.971297243  | 1.141311222   | 0.474311656  |
|          |       | C56 | -2.540236273  | 1.610800761   | -1.661784929 |
|          |       | C57 | -6.850909480  | 6.035022238   | 3.245721958  |
|          |       | C58 | -6.754480891  | 6.191824757   | 4.762061038  |
|          |       | C59 | -8.324780344  | 6.090590464   | 2.780934779  |
|          |       | C60 | -8.945339331  | 7.452021813   | 2.664028460  |
|          |       | C61 | -8.872633794  | 8.555565708   | 3.491720614  |
|          |       | C62 | -10.193542041 | 8.973881259   | 1.762459438  |
|          |       | C63 | 9.234547806   | 1.627989661   | 3.419779108  |
|          |       | C64 | 10.270888893  | 0.531642154   | 3.251766518  |
|          |       | C65 | 7.841592930   | 0.979868527   | 3.239819574  |
|          |       | C66 | 6.709041871   | 1.956272211   | 3.456067913  |
|          |       | C67 | 6.136716762   | 2.149915613   | 4.725666926  |
|          |       | C68 | 6.198496428   | 2.709596058   | 2.383264854  |
|          |       | C69 | 5.088102297   | 3.057220999   | 4.921261191  |
|          |       | C70 | 5.168578614   | 3.632047573   | 2.565793935  |
|          |       | C71 | 4.605781227   | 3.796983024   | 3.833857879  |
|          |       | C72 | 5.368696636   | 6.853342375   | -1.399966903 |
|          |       | C73 | 4.314437161   | 7.954809708   | -1.608109763 |
|          |       | C74 | 4.694983684   | 5.516176409   | -1.105111146 |
|          |       | C75 | 3.308191387   | 9.543603090   | -3.209590214 |
|          |       | C76 | 1.833636366   | 9.163928019   | -3.371181264 |
|          |       | C77 | 0.214709633   | 7.267757544   | -3.331339237 |
|          |       | C78 | -0.249383864  | 6.926449323   | -1.891732171 |
|          |       | C79 | 0.243975352   | 6.022710609   | -4.245678087 |
|          |       | C80 | -1.010152722  | 5.146988382   | -4.351142575 |
|          |       | C81 | -2.154870759  | 5.683624476   | -5.227092864 |
|          |       | C82 | -3.676662619  | 7.603244130   | -4.745461611 |
|          |       | C83 | 0.274851485   | 5.979050174   | 0.303311882  |
|          |       | C84 | 0.117703569   | 7.197763216   | 1.224159479  |
|          |       | C85 | 1.276218142   | 5.013930311   | 0.971160641  |
|          |       | C86 | 1.199117861   | 9.261864708   | 1.969342814  |
|          |       | C87 | 0.556047582   | 10.605591425  | 1.661632307  |
|          |       | C88 | -0.852544813  | 11.872276080  | 0.130604445  |

|       |              |               |              |
|-------|--------------|---------------|--------------|
| C89   | -2.126784476 | 12.427477941  | 0.812211771  |
| C90   | -1.010777044 | 11.881443082  | -1.392111280 |
| C91   | -2.157196674 | 11.016004652  | -1.899289261 |
| C92   | -4.070911895 | 11.948129190  | 2.224413582  |
| C93   | -3.985260607 | 13.050817256  | 3.271434422  |
| C94   | -4.729642817 | 10.681527425  | 2.838452724  |
| C95   | -4.971213890 | 9.608138743   | 1.801951123  |
| C96   | -6.151677606 | 9.607182672   | 1.043342656  |
| C97   | -4.006996996 | 8.625065895   | 1.526551929  |
| C98   | -6.357045018 | 8.671609174   | 0.028021857  |
| C99   | -4.183047466 | 7.696268326   | 0.496092216  |
| C100  | -5.358627232 | 7.736889681   | -0.247716159 |
| C101  | 4.088445247  | -3.984904423  | -9.001253520 |
| C102  | 2.662179189  | -3.731202157  | -8.546427705 |
| C103  | 1.208061528  | -2.193632983  | -7.246404500 |
| C104  | 0.708859779  | -0.837982365  | -7.758659967 |
| C105  | 1.126209099  | 1.584525898   | -7.715718500 |
| C106  | 2.300961198  | 2.539145124   | -7.915606511 |
| C107  | 4.582193945  | 3.205112695   | -7.404765036 |
| C108  | 5.165893892  | 3.375464893   | -8.793667679 |
| C109  | -2.766358207 | -3.496896497  | -9.160339974 |
| C110  | -3.793508369 | -2.406896549  | -8.829206623 |
| C111  | -2.274657402 | -4.169842464  | -7.857812700 |
| C112  | -1.539745589 | -5.490036673  | -8.154021636 |
| C113  | -0.864329304 | -6.015724281  | -6.907482039 |
| C114  | -4.196893878 | -0.087774432  | -8.168001503 |
| C115  | -3.717758792 | 1.196441202   | -8.815910249 |
| C116  | -4.564714160 | 0.044658519   | -6.668312743 |
| C117  | -3.326204127 | 0.061222093   | -5.816842877 |
| C118  | -2.602194901 | 1.250230337   | -5.621461216 |
| C119  | -2.787132639 | -1.147342690  | -5.345891148 |
| C120  | -1.325035393 | 1.209585998   | -5.052261258 |
| C121  | -1.511411499 | -1.187649399  | -4.776577766 |
| C122  | -0.763178311 | -0.011421856  | -4.667457178 |
| C123  | 7.921564824  | -6.239565980  | -4.772004239 |
| C124  | 9.102998045  | -6.322515522  | -3.794542120 |
| C125  | 6.609740079  | -6.599575491  | -4.060364840 |
| C126  | 5.356598021  | -6.397607481  | -4.846832901 |
| C127  | 5.004666642  | -6.991142977  | -6.041978954 |
| C128  | 3.266370732  | -5.884093967  | -5.235635202 |
| C129  | 10.310706494 | -7.543280644  | -2.088611498 |
| C130  | 11.663354291 | -7.322859995  | -2.729743783 |
| C131  | 0.603058014  | -6.926652682  | -0.196428083 |
| C132  | 2.093926555  | -6.963848081  | 0.121788163  |
| C133  | 3.012356848  | -7.087293645  | -1.131551101 |
| C134  | 2.927998111  | -8.530631876  | -1.696513872 |
| C135  | 3.961733152  | -8.873672566  | -2.771449855 |
| C136  | 3.986082420  | -10.364447276 | -3.175060007 |
| C137  | 4.466619054  | -6.813230387  | -0.709135043 |
| C138  | 3.576872446  | -0.702609299  | -2.232469810 |
| Fe139 | 3.864991960  | -1.968412029  | -3.707126876 |
| Fe140 | 2.189317764  | 0.820908510   | -1.571623845 |
| Fe141 | 5.050184080  | 0.473362148   | -1.574008733 |
| Fe142 | 3.768774642  | 0.552044190   | -3.820140615 |
| Fe143 | 3.900027340  | 2.735152511   | -2.363374681 |
| Fe144 | 4.668831886  | -2.064388529  | -1.313132170 |
| Fe145 | 2.177655193  | -2.370399795  | -1.758413864 |
| H146  | -6.362167165 | -7.529256025  | 0.344236742  |
| H147  | -6.539636446 | -6.534786542  | -0.937605786 |
| H148  | -9.715735221 | -4.792143288  | 1.387435472  |
| H149  | -8.848803409 | -6.130285440  | -0.402550206 |
| H150  | -8.692322674 | -7.250113675  | 0.947146469  |
| H151  | -7.900013982 | -2.734047476  | 2.048218620  |
| H152  | -8.672714640 | -5.608446602  | 3.967466555  |
| H153  | -9.524710278 | -2.947100469  | 2.732789289  |
| H154  | -7.908350620 | -6.255807443  | 6.067266575  |
| H155  | -6.032219652 | -5.843551697  | 3.653601530  |
| H156  | -7.710300832 | -4.544780446  | 6.508077990  |
| H157  | -2.890234316 | -1.773526277  | 3.203428516  |
| H158  | -4.992537733 | -3.702416291  | 3.051237018  |
| H159  | -3.752673934 | -6.178941122  | 3.305891334  |
| H160  | -4.777234666 | -0.085143914  | 7.155119728  |
| H161  | -5.662283935 | -2.297181278  | 5.513892304  |
| H162  | -3.471919366 | -6.279747693  | 5.062393920  |
| H163  | -4.623355813 | -1.449359463  | 2.984648081  |
| H164  | -4.218150624 | -3.638745012  | 7.487275138  |
| H165  | -5.917579586 | -1.372088910  | 7.635179366  |
| H166  | -0.540496642 | -3.308055598  | 3.707920769  |
| H167  | -0.702433803 | -2.246055123  | 2.297077910  |
| H168  | 0.904865491  | -2.601911948  | 2.948702973  |

|      |               |              |               |
|------|---------------|--------------|---------------|
| H169 | -1.280902385  | -1.151200350 | 4.541520696   |
| H170 | -3.354002265  | -4.692393506 | 9.385288701   |
| H171 | -1.872569680  | 2.033351501  | 5.315819332   |
| H172 | -1.450660927  | -0.254908813 | 9.212585979   |
| H173 | -1.717564018  | 3.170798701  | 9.524408756   |
| H174 | 0.889721878   | 0.119360628  | 2.823037199   |
| H175 | 0.164348758   | 0.964832943  | 4.190633849   |
| H176 | 9.307872597   | 1.987469448  | 4.464464078   |
| H177 | -2.824091011  | 3.385040523  | 5.951078440   |
| H178 | -2.700156683  | 4.056179193  | 8.334672121   |
| H179 | -1.058101438  | 3.550530303  | 5.789825459   |
| H180 | -0.925709733  | 4.207096249  | 8.313205286   |
| H181 | -2.513878089  | 1.638637818  | 7.715803374   |
| H182 | 0.466444948   | 2.198314940  | 7.275987863   |
| H183 | -1.275759687  | 0.043776376  | 6.408287016   |
| H184 | -0.853424905  | 0.432436981  | 2.851312480   |
| H185 | 1.577536107   | 4.252935587  | 0.237076365   |
| H186 | 0.741963092   | 4.514311395  | 1.792410218   |
| H187 | 2.674206675   | 5.322847925  | 2.326013532   |
| H188 | 3.216863371   | 4.681787014  | 4.863341741   |
| H189 | 4.775975249   | 4.199776970  | 1.721872758   |
| H190 | 6.597891709   | 2.553277347  | 1.378529570   |
| H191 | 6.506834347   | 1.575985706  | 5.580059506   |
| H192 | -0.779641699  | -2.655294394 | 6.343258235   |
| H193 | 0.226315213   | -5.644876263 | 6.433067482   |
| H194 | 0.834771341   | -5.079990767 | 8.002650727   |
| H195 | -1.852014140  | -4.523134832 | 6.839274982   |
| H196 | -2.844258520  | -3.115075776 | 10.037111107  |
| H197 | 4.642090417   | 3.181595829  | 5.912107727   |
| H198 | 1.677440623   | -1.611926234 | 5.067385192   |
| H199 | -0.753423184  | 0.711682607  | 11.740200896  |
| H200 | -0.962712597  | -1.008761357 | 11.325897003  |
| H201 | 1.647739211   | -0.730283191 | 10.480081122  |
| H202 | 11.145711955  | -7.049694572 | 4.031392146   |
| H203 | -1.753758425  | -5.978395705 | -4.126092996  |
| H204 | 1.234859569   | -6.067762846 | -1.805430150  |
| H205 | -2.268864387  | -6.242424123 | -8.488414371  |
| H206 | -0.802133438  | -5.343144848 | -8.955968776  |
| H207 | -3.125175155  | -4.375573105 | -7.189304175  |
| H208 | -3.108823532  | 1.044087875  | -9.738125480  |
| H209 | -3.353146875  | -4.242965328 | -9.717600296  |
| H210 | -3.363464478  | -2.192953059 | -2.294879400  |
| H211 | -3.951100455  | -4.976105669 | -1.162868293  |
| H212 | -2.286132639  | -1.030655971 | -8.438293214  |
| H213 | -5.138177050  | -0.322457155 | -8.706467602  |
| H214 | -1.045730095  | -2.408409887 | -9.572919261  |
| H215 | -1.322159016  | -5.847995822 | -2.424592781  |
| H216 | -1.618046050  | -3.466494615 | -7.321795483  |
| H217 | -1.213560177  | -3.775589502 | -10.474831687 |
| H218 | -6.749529451  | -3.462875190 | -2.859318800  |
| H219 | -3.480339640  | -2.417230782 | -0.534184639  |
| H220 | 0.830173938   | -5.292244700 | -7.587932013  |
| H221 | -2.322048029  | -4.334157120 | -1.036810192  |
| H222 | -3.833445783  | 2.607338966  | 3.079711473   |
| H223 | -3.004232888  | 0.531660717  | 1.367953622   |
| H224 | -8.136160035  | 0.774147458  | 3.807680650   |
| H225 | -7.263313965  | -0.074399607 | 1.079010261   |
| H226 | -6.932306988  | 4.081591631  | 2.370648185   |
| H227 | -8.328841259  | 8.744206274  | 4.409910125   |
| H228 | -6.905072625  | 5.236700016  | 5.322390311   |
| H229 | -8.931943677  | 5.435947681  | 3.431358200   |
| H230 | -6.267731643  | 6.838204570  | 2.768405979   |
| H231 | -10.866476672 | 9.523277274  | 1.109921592   |
| H232 | -3.259227993  | 4.250967179  | 1.294141847   |
| H233 | -4.813075380  | 3.973484213  | 0.494423974   |
| H234 | -9.832212197  | 10.451742498 | 3.252980190   |
| H235 | -8.365357447  | 5.646489062  | 1.773696609   |
| H236 | -6.175026144  | 2.018990493  | 1.375453794   |
| H237 | -7.014531152  | -0.554886894 | 3.517026837   |
| H238 | -9.866623334  | 1.920680016  | -0.216895136  |
| H239 | -2.197365537  | 1.511562080  | -2.689185915  |
| H240 | -10.210869916 | 0.182017684  | -0.146735621  |
| H241 | 10.292967727  | 3.212296239  | 2.673256346   |
| H242 | 8.685277765   | 3.315806518  | 2.401507019   |
| H243 | 1.550730850   | 5.970295428  | -1.438757203  |
| H244 | -0.708900368  | 5.488041580  | 0.276567795   |
| H245 | 1.736156895   | 8.068148004  | 0.309343789   |
| H246 | -3.440072915  | 3.543556777  | -1.609775505  |
| H247 | -5.116562311  | 4.160573561  | -2.787141876  |
| H248 | -6.709342261  | 3.390064840  | -4.169165135  |

|      |              |               |               |
|------|--------------|---------------|---------------|
| H249 | -4.800735462 | 5.411228847   | -1.851354156  |
| H250 | -5.531618939 | 1.248782168   | -4.071755258  |
| H251 | -7.312586712 | 1.273676265   | -3.872355614  |
| H252 | -0.057377416 | 11.608719764  | -1.865670142  |
| H253 | -1.241910006 | 12.917923099  | -1.683815153  |
| H254 | -0.911216365 | 10.177345520  | -3.325891722  |
| H255 | -2.587633438 | 9.630402112   | -3.298651250  |
| H256 | -3.694282309 | 9.198620073   | -6.036226098  |
| H257 | -2.650538201 | 4.851207426   | -5.749404917  |
| H258 | -7.287524828 | 8.674504132   | -0.545749424  |
| H259 | -3.093056490 | 8.561278957   | 2.122437108   |
| H260 | -4.695861549 | 7.772170080   | -2.962384389  |
| H261 | 1.064161982  | 5.377184047   | -3.892364498  |
| H262 | 2.344041675  | 7.195659227   | -3.237527889  |
| H263 | -1.393796187 | 4.883959302   | -3.353028145  |
| H264 | -8.365747842 | -0.216100115  | -1.480025804  |
| H265 | 3.641214115  | 10.006317311  | -4.148273546  |
| H266 | -6.098301797 | -0.957242464  | -3.064791517  |
| H267 | 0.535095605  | 6.361574070   | -5.253420633  |
| H268 | -3.392377357 | 6.983223707   | 0.258809219   |
| H269 | 3.340372838  | 10.312776492  | -2.424324229  |
| H270 | -2.949363675 | 7.767512861   | -6.669228985  |
| H271 | -5.106512218 | 8.947610999   | -4.166594218  |
| H272 | -5.181385370 | -3.522262019  | -3.437657177  |
| H273 | -5.772647800 | -3.340183888  | -0.789547616  |
| H274 | -6.931043355 | 10.344519522  | 1.249336075   |
| H275 | -5.252333607 | 1.385548919   | -1.600620666  |
| H276 | -0.486884788 | 8.021601804   | -3.702091159  |
| H277 | -1.739863405 | 6.343651976   | -5.999169092  |
| H278 | -0.679086167 | 4.203840402   | -4.807602254  |
| H279 | -3.601874059 | 5.873347069   | -3.675987871  |
| H280 | 0.808394418  | 8.922119921   | 2.940201395   |
| H281 | -0.457825790 | 9.754939789   | 0.102468941   |
| H282 | -0.084757830 | 12.620822124  | 0.380430845   |
| H283 | 2.277298222  | 9.440136904   | 2.077253018   |
| H284 | -2.441868742 | 10.648741342  | 1.733736629   |
| H285 | 4.608185495  | -3.027978733  | -9.154958368  |
| H286 | 4.588180309  | -4.487920335  | -8.146397244  |
| H287 | 7.882931176  | -5.185663550  | -5.085244337  |
| H288 | 5.048202671  | -5.096979122  | -10.413912906 |
| H289 | 3.511675745  | -5.583549057  | -10.123754292 |
| H290 | 5.483728369  | 4.767425154   | -0.960716399  |
| H291 | 5.710543383  | 7.424334596   | 0.530617331   |
| H292 | 4.824134994  | 8.089056861   | -3.597091442  |
| H293 | 4.095223869  | 5.592812343   | -0.187465235  |
| H294 | 6.806101728  | 8.029684949   | -0.521810243  |
| H295 | 5.390101767  | 2.847438984   | -6.748148689  |
| H296 | 5.975445018  | 6.752307420   | -2.313112605  |
| H297 | 5.306037250  | -7.011272780  | 4.980164482   |
| H298 | 7.056363923  | -7.887658644  | 2.617688115   |
| H299 | 3.643638731  | 1.382609451   | -6.810581632  |
| H300 | 5.136412899  | -0.102700463  | 3.233657597   |
| H301 | 0.562171034  | 1.552215572   | -8.655439210  |
| H302 | -1.091767163 | -2.137504012  | -4.437232128  |
| H303 | 0.470137167  | 2.061278089   | -6.966891424  |
| H304 | 4.269743275  | -4.494463351  | 4.491842956   |
| H305 | 2.138411554  | 0.027479220   | -6.596114069  |
| H306 | 3.933484213  | -5.087959380  | 2.860916791   |
| H307 | 4.774620981  | -7.302841077  | 3.307003460   |
| H308 | 6.426353349  | -5.484068810  | 2.558703626   |
| H309 | 6.667189627  | -5.066493164  | 4.262152694   |
| H310 | -5.208359480 | -0.807112367  | -6.404968362  |
| H311 | 5.931200781  | -9.463765558  | 4.897833735   |
| H312 | 4.987126372  | -11.783065121 | 3.152928609   |
| H313 | 0.249435541  | -0.029663625  | -4.271121748  |
| H314 | 6.322489268  | -11.805623863 | 5.751166530   |
| H315 | 4.765117138  | -12.145762307 | 5.377604218   |
| H316 | 5.533354047  | -3.346472266  | 2.026695685   |
| H317 | -0.746071623 | 2.124917351   | -4.919567372  |
| H318 | -3.358318581 | -2.072383491  | -5.447967447  |
| H319 | 7.629887163  | -9.938276723  | -1.669895219  |
| H320 | 6.642983625  | -7.661399957  | -3.760775257  |
| H321 | 6.629147470  | -8.177798701  | -0.104827278  |
| H322 | 6.767238735  | -10.541608309 | -2.815478644  |
| H323 | 4.939594822  | 2.545077610   | -9.505102845  |
| H324 | 6.348897413  | -5.044496809  | -0.209002003  |
| H325 | 2.291472825  | -7.777977938  | 0.830034640   |
| H326 | 3.283697190  | -2.021889042  | -7.608268289  |
| H327 | 3.059403016  | -9.213938682  | -0.843012661  |
| H328 | 3.105597949  | -6.972937381  | -7.033542953  |

|       |              |               |              |
|-------|--------------|---------------|--------------|
| H329  | 2.252618737  | -5.516107694  | -5.152609331 |
| H330  | 6.594581263  | -12.427401294 | 3.507480748  |
| H331  | 5.732366388  | -1.060002323  | 1.914467225  |
| H332  | 8.360026817  | -5.797529941  | 0.800214790  |
| H333  | 7.225429826  | -3.769076310  | -0.121515456 |
| H334  | 8.971091598  | -6.854037403  | 2.795739657  |
| H335  | 3.724423343  | -2.718596974  | 5.127014141  |
| H336  | 3.750346589  | -8.288672677  | -3.679433605 |
| H337  | 4.969853963  | -8.594086882  | -2.436851906 |
| H338  | 1.911878918  | -8.697421375  | -2.086135125 |
| H339  | 1.343528924  | -2.163354652  | -6.153506749 |
| H340  | -3.025787168 | 2.197312664   | -5.963883542 |
| H341  | -5.150295825 | 0.969795816   | -6.559498158 |
| H342  | 2.313284344  | -6.013178186  | 0.636433128  |
| H343  | 8.508309151  | -7.331724990  | 0.583323603  |
| H344  | 7.411258902  | -9.255683597  | 0.675339344  |
| H345  | 4.159542673  | -1.050934151  | 5.087739395  |
| H346  | 5.569146650  | -7.624626749  | -6.714187711 |
| H347  | 6.539018179  | -6.026159259  | -3.128537617 |
| H348  | 0.460190559  | -2.948440128  | -7.494795376 |
| H349  | 4.258643372  | 4.187324258   | -7.027602276 |
| H350  | 7.763823179  | 0.147348413   | 3.954527603  |
| H351  | 7.782767155  | 0.557205140   | 2.224159151  |
| H352  | 8.996898737  | -6.753817203  | -6.441175030 |
| H353  | 8.270749658  | -8.035150681  | -5.725538959 |
| H354  | 10.306921189 | -8.561279819  | -1.668921988 |
| H355  | 8.562443492  | -8.230205188  | -3.098966951 |
| H356  | 11.703055188 | -7.554882021  | -3.821603849 |
| H357  | 10.177317460 | -6.841654333  | -1.249749363 |
| H358  | 10.542717252 | 0.314373994   | 2.190203858  |
| H359  | -2.976778026 | 13.197804736  | 3.724952465  |
| H360  | 10.210231916 | -6.864302549  | 5.537700756  |
| H361  | 9.559016703  | -4.442235927  | 4.393090283  |
| H362  | -4.707595371 | 12.319048588  | 1.403959764  |
| H363  | -4.089693870 | 10.301011233  | 3.650066751  |
| H364  | -5.680074975 | 10.997809414  | 3.291968071  |
| H365  | 1.085497719  | -3.199067884  | -1.096955752 |
| H366  | 4.355505520  | -1.461588840  | -0.001550573 |
| H367  | -6.454108951 | 6.810331083   | -1.565772472 |
| H368  | 0.123878246  | -0.952750648  | -0.524762886 |
| H369  | -2.001972895 | -0.235696894  | -0.862970089 |
| Mo370 | 3.832207951  | -4.393310222  | -2.422197737 |
| N371  | -7.044640117 | -7.192666233  | -0.339277260 |
| N372  | -8.784658349 | -4.632615111  | 1.764572510  |
| N373  | -8.113808320 | -4.928107523  | 4.476760954  |
| N374  | -5.433103308 | -5.785080252  | 4.478653906  |
| N375  | -4.197500539 | -3.380651583  | 3.600427795  |
| N376  | -4.878910715 | -1.742414026  | 5.869055271  |
| N377  | -3.646093749 | -3.066354524  | 8.114126334  |
| N378  | -1.113569456 | -4.480603671  | 7.548141028  |
| N379  | 0.216118646  | -2.568078678  | 6.149052747  |
| N380  | -0.379131365 | 0.360469026   | 6.784996368  |
| N381  | -0.659844844 | 0.204612672   | 9.671399983  |
| N382  | 5.536412840  | -11.510471493 | 5.167307086  |
| N383  | 6.385527148  | -9.259880621  | 4.001522646  |
| N384  | 5.035671893  | -3.313336415  | 2.920586101  |
| N385  | 4.296175463  | -1.981795260  | 4.703415350  |
| N386  | 5.378796417  | -1.025111131  | 2.882430873  |
| N387  | 9.040559511  | -6.964817857  | 3.831754776  |
| N388  | -5.866332041 | -2.951337944  | -2.908370496 |
| N389  | -1.949218588 | -5.594212062  | -3.195204979 |
| N390  | -6.084005681 | -0.447923894  | -2.164930231 |
| N391  | -8.351592165 | 0.649891449   | -0.945634474 |
| N392  | -7.850133944 | 0.352961052   | 1.803200014  |
| N393  | -5.690983218 | 2.087653054   | 2.275276833  |
| N394  | -3.121455896 | 2.679379089   | -1.100016465 |
| N395  | -2.453980063 | 0.667590735   | -0.716012088 |
| N396  | -6.324328052 | 4.730693635   | 2.864049278  |
| N397  | -9.773694381 | 7.726245984   | 1.587425323  |
| N398  | -9.669601987 | 9.512322875   | 2.899939335  |
| N399  | 9.472375533  | 2.661443844   | 2.409466813  |
| N400  | 6.276461197  | 7.184617760   | -0.289954512 |
| N401  | 4.213412178  | 8.459128387   | -2.873483977 |
| N402  | 1.556084508  | 7.843815390   | -3.346878772 |
| N403  | -3.174731125 | 6.402908274   | -4.457096421 |
| N404  | -3.362686102 | 8.252095216   | -5.880979780 |
| N405  | -4.455016574 | 8.238955375   | -3.840223737 |
| N406  | 0.657917739  | 6.330864715   | -1.066133297 |
| N407  | 0.975834906  | 8.227311088   | 0.976909374  |
| N408  | -0.366794454 | 10.608776314  | 0.652351689  |



|      |              |               |               |
|------|--------------|---------------|---------------|
| N409 | -1.887940413 | 10.323333161  | -3.040037957  |
| N410 | -2.749330335 | 11.617698300  | 1.705150717   |
| N411 | 4.099395446  | -4.754199963  | -10.247458303 |
| N412 | 2.465668488  | -2.578221294  | -7.873496743  |
| N413 | 1.431394654  | 0.219443005   | -7.325373634  |
| N414 | 3.500048423  | 2.235106343   | -7.358071327  |
| N415 | -1.729495046 | -2.992227320  | -10.069138358 |
| N416 | -3.298332047 | -1.181727138  | -8.488329292  |
| N417 | 8.131216801  | -7.053151910  | -5.983316733  |
| N418 | 4.257074456  | -5.692026012  | -4.363200089  |
| N419 | 3.688504240  | -6.653481737  | -6.264402432  |
| N420 | 9.232538607  | -7.457978263  | -3.056527807  |
| N421 | 0.135612769  | 2.269356014   | -0.053928346  |
| N422 | 2.658119010  | -0.510282734  | 1.308294734   |
| N423 | 0.955666249  | 1.756945564   | -0.641893329  |
| N424 | 1.849738909  | -1.274573184  | 1.222590020   |
| O425 | -6.570501693 | -5.145033983  | 1.633517170   |
| O426 | -7.260020989 | -2.812946695  | 4.491833851   |
| O427 | -5.274234295 | -5.192136860  | 6.677844387   |
| O428 | -2.472536203 | -3.961798197  | 4.971656523   |
| O429 | -3.054987250 | -0.490290159  | 5.356981682   |
| O430 | -3.282952597 | -0.969795904  | 8.963111845   |
| O431 | -0.531898768 | -3.966479703  | 9.702009498   |
| O432 | 2.187915211  | -3.758380989  | 6.125807223   |
| O433 | 1.900635013  | 0.243601134   | 6.647691478   |
| O434 | 0.864506410  | 1.887533338   | 9.694101576   |
| O435 | 1.553050088  | -0.253238467  | 12.460720285  |
| O436 | 7.057058840  | -10.333247003 | 2.066679791   |
| O437 | 8.019273941  | -7.681823126  | 5.763603408   |
| O438 | 11.589189700 | -4.538773779  | 4.552082439   |
| O439 | -5.623486768 | -0.847180032  | 0.046737915   |
| O440 | -3.696563823 | -4.388852899  | -4.013014053  |
| O441 | -7.128532217 | 2.499111925   | -0.396086048  |
| O442 | -6.339355534 | 3.042618344   | -3.338002509  |
| O443 | -9.781641344 | 1.494021133   | 2.289698190   |
| O444 | -5.657045668 | 1.522293883   | 4.488701329   |
| O445 | -4.256552838 | 5.045574178   | 3.781732971   |
| O446 | -6.580504122 | 7.252383865   | 5.336878218   |
| O447 | 10.772795262 | -0.086617421  | 4.179257914   |
| O448 | 3.560626889  | 4.694047689   | 3.951175443   |
| O449 | 3.601029846  | 8.374813792   | -0.680029509  |
| O450 | 0.987378490  | 10.066375609  | -3.522264229  |
| O451 | -1.406414797 | 7.194048220   | -1.531313454  |
| O452 | -0.695713063 | 7.187361051   | 2.157618316   |
| O453 | 2.427407265  | 5.706295872   | 1.459797179   |
| O454 | 0.856337627  | 11.617658396  | 2.306093866   |
| O455 | -2.505340146 | 13.583702663  | 0.576847580   |
| O456 | -3.265142337 | 10.996214626  | -1.344076098  |
| O457 | -4.950417678 | 13.710053635  | 3.621767009   |
| O458 | -5.508094391 | 6.838373264   | -1.323920464  |
| O459 | 1.757733220  | -4.573539505  | -8.765852477  |
| O460 | -0.274330376 | -0.739476792  | -8.521175265  |
| O461 | 2.114608324  | 3.601744132   | -8.531512253  |
| O462 | 5.864993521  | 4.321995647   | -9.114950209  |
| O463 | -5.013533580 | -2.638517334  | -8.852309715  |
| O464 | -1.467569282 | -6.598629925  | -6.012880054  |
| O465 | 0.456401151  | -5.773530133  | -6.785922540  |
| O466 | -4.001800335 | 2.319370421   | -8.422363109  |
| O467 | 9.941596656  | -5.404795273  | -3.703623365  |
| O468 | 12.662982372 | -6.985823410  | -2.112033714  |
| O469 | 0.286379480  | -6.292265301  | -1.333110731  |
| O470 | -0.255261773 | -7.388243192  | 0.553165697   |
| O471 | 5.137795278  | -10.900474531 | -3.349023553  |
| O472 | 2.876764841  | -10.947105321 | -3.336189003  |
| O473 | 5.068444810  | -5.815702972  | -1.303302949  |
| O474 | 5.020997350  | -7.531980161  | 0.144018774   |
| O475 | 2.600241256  | -6.112007239  | -2.092323553  |
| O476 | 8.948132742  | -6.557204978  | 1.032705882   |
| O477 | 6.971700139  | -4.559623894  | 0.392693846   |
| O478 | -4.384053773 | 4.746858681   | -2.454849059  |
| O479 | 7.718618001  | -10.434160079 | -2.514008497  |
| O480 | 7.512078030  | -8.634586535  | -0.090042714  |
| S481 | 3.584046121  | 4.974324571   | -2.484651003  |
| S482 | 2.088306326  | 2.004949012   | -3.484748660  |
| S483 | 2.110460991  | -3.356045020  | -3.707165384  |
| S484 | 3.834197878  | 1.901276066   | -0.331248285  |
| S485 | 0.547569569  | -0.820561288  | -1.814321451  |
| S486 | 4.078404567  | -0.787401204  | -5.567229257  |
| S487 | 3.359029524  | -3.506102131  | -0.285664093  |
| S488 | 5.688453629  | 1.694666549   | -3.326383962  |

|                          |                                   |               |               |              |
|--------------------------|-----------------------------------|---------------|---------------|--------------|
|                          | S489                              | 5.701554015   | -3.069050297  | -3.037181203 |
|                          | S490                              | 6.437065988   | -0.823007058  | -0.488067620 |
|                          | end                               |               |               |              |
| transition state (S=3/2) | <b>bm52exp335fe2captgfe.car_1</b> |               |               |              |
| Fe( 139) -2.287          | C1                                | -7.731913308  | -5.366053776  | 1.276023179  |
| Fe( 140) -0.369          | C2                                | -8.137645330  | -6.510085396  | 0.338259933  |
| Fe( 141) -2.543          | C3                                | -8.534035593  | -3.433208156  | 2.564460021  |
| Fe( 142) 2.576           | C4                                | -7.894562426  | -3.692703616  | 3.924567204  |
| Fe( 143) 2.508           | C5                                | -7.461431207  | -5.279736448  | 5.734650468  |
| Fe( 144) 1.648           | C6                                | -5.936623155  | -5.400134129  | 5.667394522  |
| Fe( 145) 1.562           | C7                                | -3.962264294  | -5.707229341  | 4.273955256  |
|                          | C8                                | -3.451681999  | -4.264672851  | 4.303877819  |
|                          | C9                                | -3.877000776  | -1.948259323  | 3.599945203  |
|                          | C10                               | -3.891173613  | -1.315308427  | 5.000793486  |
|                          | C11                               | -4.911763368  | -1.151308630  | 7.181795075  |
|                          | C12                               | -3.854230444  | -1.702751655  | 8.148991602  |
|                          | C13                               | -2.848886774  | -3.718291689  | 9.127171996  |
|                          | C14                               | -1.382155039  | -4.038379789  | 8.803068839  |
|                          | C15                               | 0.238514962   | -4.809097053  | 7.117576133  |
|                          | C16                               | 0.974803902   | -3.656468351  | 6.425173494  |
|                          | C17                               | 0.636318355   | -1.426342302  | 5.382583833  |
|                          | C18                               | 0.768375198   | -0.210575245  | 6.315013015  |
|                          | C19                               | -0.243272851  | -1.219512512  | 4.131488347  |
|                          | C20                               | 0.017278201   | 0.122618059   | 3.427640441  |
|                          | C21                               | -0.090788687  | -2.410084897  | 3.175601262  |
|                          | C22                               | -0.356105535  | 1.543433725   | 7.610953293  |
|                          | C23                               | 0.013363769   | 1.220183868   | 9.070979942  |
|                          | C24                               | -1.683296251  | 2.327419102   | 7.477766960  |
|                          | C25                               | -1.746518145  | 3.494171562   | 8.468945891  |
|                          | C26                               | -1.863728860  | 2.837435480   | 6.041115252  |
|                          | C27                               | -0.401173140  | -0.089554644  | 11.069111503 |
|                          | C28                               | 1.064569246   | -0.355416666  | 11.349443516 |
|                          | C29                               | 5.896472676   | -11.596603222 | 3.752955298  |
|                          | C30                               | 6.516233454   | -10.321251666 | 3.193763436  |
|                          | C31                               | 6.786307735   | -7.894740459  | 3.681092115  |
|                          | C32                               | 8.007058375   | -7.498609120  | 4.531363803  |
|                          | C33                               | 5.605586588   | -6.941144653  | 3.922102862  |
|                          | C34                               | 5.939799079   | -5.499759427  | 3.551819054  |
|                          | C35                               | 4.698634559   | -4.613838113  | 3.505639260  |
|                          | C36                               | 4.902122156   | -2.114451473  | 3.533413111  |
|                          | C37                               | 10.268169690  | -6.557518976  | 4.483857235  |
|                          | C38                               | 10.496157601  | -5.063351139  | 4.471677094  |
|                          | C39                               | -5.328150199  | -2.676785056  | -1.559147082 |
|                          | C40                               | -5.691877232  | -1.243482004  | -1.124263758 |
|                          | C41                               | -3.790503658  | -2.823001728  | -1.503129818 |
|                          | C42                               | -3.244471464  | -4.261040386  | -1.621129895 |
|                          | C43                               | -2.977948156  | -4.747635748  | -3.046404285 |
|                          | C44                               | -6.183521003  | 0.995951941   | -2.029680502 |
|                          | C45                               | -7.274170878  | 1.450500133   | -1.049308064 |
|                          | C46                               | -6.361750712  | 1.604290952   | -3.426387939 |
|                          | C47                               | -9.428106953  | 0.926123949   | -0.003564137 |
|                          | C48                               | -9.031041994  | 0.947300344   | 1.475706128  |
|                          | C49                               | -7.325131576  | 0.437977144   | 3.158894813  |
|                          | C50                               | -6.154756261  | 1.400063633   | 3.369814227  |
|                          | C51                               | -4.604386654  | 3.043324085   | 2.435136653  |
|                          | C52                               | -5.046473048  | 4.351803337   | 3.132539393  |
|                          | C53                               | -4.021214193  | 3.477316011   | 1.081706618  |
|                          | C54                               | -3.403533195  | 2.414894774   | 0.235724602  |
|                          | C55                               | -2.976732657  | 1.132884547   | 0.472329203  |
|                          | C56                               | -2.545103460  | 1.602883032   | -1.663283261 |
|                          | C57                               | -6.849746888  | 6.031619081   | 3.240219900  |
|                          | C58                               | -6.756860543  | 6.187062302   | 4.757008685  |
|                          | C59                               | -8.321904386  | 6.086161499   | 2.770025297  |
|                          | C60                               | -8.945202182  | 7.446525575   | 2.656377597  |
|                          | C61                               | -8.870396521  | 8.549985317   | 3.483956990  |
|                          | C62                               | -10.199635638 | 8.966527105   | 1.760585349  |
|                          | C63                               | 9.238103587   | 1.624707088   | 3.434018187  |
|                          | C64                               | 10.267406561  | 0.521211676   | 3.266402840  |
|                          | C65                               | 7.843771076   | 0.980771576   | 3.252985684  |
|                          | C66                               | 6.711350031   | 1.957853662   | 3.466366346  |
|                          | C67                               | 6.140922360   | 2.156137536   | 4.736246713  |
|                          | C68                               | 6.195397568   | 2.703129989   | 2.390796790  |
|                          | C69                               | 5.089202657   | 3.060164392   | 4.929338927  |
|                          | C70                               | 5.161697466   | 3.622287129   | 2.570704518  |
|                          | C71                               | 4.601016656   | 3.792018501   | 3.839091990  |
|                          | C72                               | 5.370967457   | 6.864111350   | -1.392886733 |
|                          | C73                               | 4.314855580   | 7.962136242   | -1.602033823 |
|                          | C74                               | 4.700400547   | 5.521840931   | -1.098318844 |
|                          | C75                               | 3.307609288   | 9.545057958   | -3.207832773 |
|                          | C76                               | 1.832658710   | 9.167001565   | -3.367692373 |

|       |              |               |              |
|-------|--------------|---------------|--------------|
| C77   | 0.212439188  | 7.271263896   | -3.326975237 |
| C78   | -0.254086028 | 6.927776043   | -1.888629602 |
| C79   | 0.243740640  | 6.025697199   | -4.241247741 |
| C80   | -1.009218598 | 5.148248396   | -4.347934414 |
| C81   | -2.153345084 | 5.683057609   | -5.225922852 |
| C82   | -3.674357370 | 7.604164412   | -4.743253193 |
| C83   | 0.268196721  | 5.983029272   | 0.308784867  |
| C84   | 0.115250037  | 7.204328271   | 1.227544685  |
| C85   | 1.264703749  | 5.014287033   | 0.978041205  |
| C86   | 1.200956995  | 9.268857042   | 1.966420106  |
| C87   | 0.557230644  | 10.612176494  | 1.657452067  |
| C88   | -0.855911746 | 11.876524677  | 0.127473572  |
| C89   | -2.129902615 | 12.430769306  | 0.810884172  |
| C90   | -1.018012073 | 11.883195843  | -1.394972755 |
| C91   | -2.160545302 | 11.009719810  | -1.896974510 |
| C92   | -4.074009250 | 11.948408705  | 2.223401682  |
| C93   | -3.985312611 | 13.048851795  | 3.272668513  |
| C94   | -4.729923924 | 10.679453469  | 2.836175188  |
| C95   | -4.971330770 | 9.606129573   | 1.799231955  |
| C96   | -6.155146150 | 9.600220776   | 1.045670424  |
| C97   | -4.004525420 | 8.626614112   | 1.519360554  |
| C98   | -6.361348351 | 8.663834335   | 0.031096680  |
| C99   | -4.181212348 | 7.697592791   | 0.489225850  |
| C100  | -5.360027501 | 7.733649910   | -0.249864390 |
| C101  | 4.088432658  | -3.980879340  | -8.999324171 |
| C102  | 2.661868514  | -3.729359919  | -8.543937123 |
| C103  | 1.208596719  | -2.195226430  | -7.236398223 |
| C104  | 0.710972568  | -0.838145318  | -7.746995083 |
| C105  | 1.127375769  | 1.583523266   | -7.702965558 |
| C106  | 2.299449861  | 2.540626089   | -7.908278170 |
| C107  | 4.578796661  | 3.219129827   | -7.403732984 |
| C108  | 5.175979824  | 3.372308770   | -8.787936182 |
| C109  | -2.762338070 | -3.494898935  | -9.149461742 |
| C110  | -3.789241133 | -2.405913311  | -8.814489875 |
| C111  | -2.272062202 | -4.173271380  | -7.849249402 |
| C112  | -1.536958815 | -5.492308692  | -8.149827878 |
| C113  | -0.857177324 | -6.019763642  | -6.906318378 |
| C114  | -4.194345250 | -0.087052157  | -8.155659331 |
| C115  | -3.716323855 | 1.197577983   | -8.803073525 |
| C116  | -4.566810214 | 0.044109670   | -6.657344181 |
| C117  | -3.329017250 | 0.057934578   | -5.805864788 |
| C118  | -2.603823604 | 1.245860669   | -5.609749416 |
| C119  | -2.789892288 | -1.153080484  | -5.340838261 |
| C120  | -1.323730048 | 1.201824136   | -5.047682838 |
| C121  | -1.511916723 | -1.196242940  | -4.778035813 |
| C122  | -0.761389740 | -0.021027375  | -4.671604076 |
| C123  | 7.912037534  | -6.230597133  | -4.764389446 |
| C124  | 9.096503333  | -6.320527001  | -3.790960090 |
| C125  | 6.601238135  | -6.598502521  | -4.054996745 |
| C126  | 5.345678246  | -6.379580331  | -4.833666136 |
| C127  | 4.981913874  | -6.961156222  | -6.031436088 |
| C128  | 3.258404474  | -5.844704346  | -5.208505371 |
| C129  | 10.306286840 | -7.550680456  | -2.092189325 |
| C130  | 11.657241413 | -7.320360068  | -2.733109659 |
| C131  | 0.601194432  | -6.942543567  | -0.185357666 |
| C132  | 2.091107825  | -6.981211521  | 0.131804069  |
| C133  | 3.010892202  | -7.105197633  | -1.119820000 |
| C134  | 2.915554029  | -8.540121726  | -1.701220362 |
| C135  | 3.950786873  | -8.877527043  | -2.777200971 |
| C136  | 3.976865954  | -10.367392295 | -3.181557008 |
| C137  | 4.466501349  | -6.845227945  | -0.693800410 |
| C138  | 3.589204883  | -0.693477216  | -2.232097111 |
| Fe139 | 3.824779862  | -2.015496700  | -3.688583207 |
| Fe140 | 2.243400454  | 0.747848517   | -1.459349674 |
| Fe141 | 5.072189920  | 0.482629467   | -1.550973454 |
| Fe142 | 3.787164971  | 0.505618577   | -3.780626567 |
| Fe143 | 3.933570016  | 2.745404707   | -2.364224983 |
| Fe144 | 4.715996880  | -2.047383839  | -1.286148842 |
| Fe145 | 2.161281832  | -2.435684307  | -1.687511354 |
| H146  | -6.374056482 | -7.536225463  | 0.329579609  |
| H147  | -6.554534576 | -6.544301576  | -0.954039097 |
| H148  | -9.702210529 | -4.780070080  | 1.392340894  |
| H149  | -8.854836974 | -6.118818035  | -0.401318006 |
| H150  | -8.698380977 | -7.238521954  | 0.949054181  |
| H151  | -7.873452939 | -2.727659312  | 2.039381701  |
| H152  | -8.646201865 | -5.596848335  | 3.966114616  |
| H153  | -9.497008316 | -2.931724666  | 2.728440333  |
| H154  | -7.879830725 | -6.238584911  | 6.066907476  |
| H155  | -6.003064597 | -5.840568135  | 3.653786616  |
| H156  | -7.680707869 | -4.525935965  | 6.501917545  |

|      |               |              |               |
|------|---------------|--------------|---------------|
| H157 | -2.881468732  | -1.759407718 | 3.177091075   |
| H158 | -4.967607056  | -3.701425686 | 3.030839833   |
| H159 | -3.719370315  | -6.170863469 | 3.308551177   |
| H160 | -4.759591589  | -0.065404745 | 7.129039965   |
| H161 | -5.642410023  | -2.287218299 | 5.497911438   |
| H162 | -3.440573698  | -6.256892372 | 5.065934862   |
| H163 | -4.617582469  | -1.445126597 | 2.962107771   |
| H164 | -4.198528735  | -3.616208290 | 7.468968683   |
| H165 | -5.904931190  | -1.347076144 | 7.610095396   |
| H166 | -0.414296513  | -3.347965583 | 3.647168243   |
| H167 | -0.702511236  | -2.260162157 | 2.272046063   |
| H168 | 0.948725302   | -2.518067560 | 2.834966110   |
| H169 | -1.279854911  | -1.197009319 | 4.490347383   |
| H170 | -3.349185509  | -4.665187174 | 9.379541114   |
| H171 | -1.867904486  | 2.020446677  | 5.307530150   |
| H172 | -1.446923664  | -0.258228209 | 9.214279013   |
| H173 | -1.697958364  | 3.159431210  | 9.514894473   |
| H174 | 0.781237187   | 0.027361821  | 2.646008957   |
| H175 | 0.330054349   | 0.916683132  | 4.120304842   |
| H176 | 9.312292704   | 1.983420250  | 4.478725913   |
| H177 | -2.819285899  | 3.372601505  | 5.943501262   |
| H178 | -2.688950323  | 4.044114646  | 8.331115568   |
| H179 | -1.053269155  | 3.537954480  | 5.779731533   |
| H180 | -0.914554404  | 4.195902843  | 8.298444473   |
| H181 | -2.507882317  | 1.628808753  | 7.709333345   |
| H182 | 0.472060255   | 2.177115072  | 7.258369157   |
| H183 | -1.284502755  | 0.033721682  | 6.394995050   |
| H184 | -0.908496120  | 0.473257901  | 2.944648031   |
| H185 | 1.557663029   | 4.246753630  | 0.246944340   |
| H186 | 0.729378945   | 4.522227091  | 1.803166987   |
| H187 | 2.668027183   | 5.321121375  | 2.328021640   |
| H188 | 3.212613497   | 4.678455125  | 4.867227941   |
| H189 | 4.763781619   | 4.182617357  | 1.724552075   |
| H190 | 6.593224497   | 2.542904714  | 1.385936068   |
| H191 | 6.514185985   | 1.587426981  | 5.592611645   |
| H192 | -0.805538152  | -2.697720737 | 6.285774547   |
| H193 | 0.216987760   | -5.655885039 | 6.416630632   |
| H194 | 0.834270720   | -5.108314731 | 7.989141343   |
| H195 | -1.858166867  | -4.547771300 | 6.842364485   |
| H196 | -2.830856477  | -3.086784406 | 10.023342374  |
| H197 | 4.644410939   | 3.187435209  | 5.920304557   |
| H198 | 1.665615388   | -1.635894255 | 5.067106451   |
| H199 | -0.747939504  | 0.716594858  | 11.736403381  |
| H200 | -0.951483861  | -1.007276320 | 11.328978947  |
| H201 | 1.653731853   | -0.731727686 | 10.481138051  |
| H202 | 11.141720226  | -7.059711218 | 4.040572362   |
| H203 | -1.756197488  | -5.988493294 | -4.123756840  |
| H204 | 1.220966007   | -6.070459406 | -1.787088674  |
| H205 | -2.266226007  | -6.244677011 | -8.483815731  |
| H206 | -0.801752263  | -5.343207981 | -8.953693140  |
| H207 | -3.123510149  | -4.381384521 | -7.182733809  |
| H208 | -3.112745585  | 1.045687951  | -9.729002371  |
| H209 | -3.349439347  | -4.238591627 | -9.709736834  |
| H210 | -3.350397172  | -2.195422090 | -2.296627399  |
| H211 | -3.951772659  | -4.973329416 | -1.162651397  |
| H212 | -2.282471588  | -1.027701804 | -8.427866792  |
| H213 | -5.134224379  | -0.322278988 | -8.696746765  |
| H214 | -1.040021377  | -2.407082674 | -9.558640904  |
| H215 | -1.325915431  | -5.858626415 | -2.421890101  |
| H216 | -1.616293522  | -3.472450692 | -7.309076158  |
| H217 | -1.211578157  | -3.769814100 | -10.467340290 |
| H218 | -6.739004229  | -3.460074511 | -2.850431285  |
| H219 | -3.461794519  | -2.416274036 | -0.535055111  |
| H220 | 0.832805505   | -5.289776988 | -7.589710057  |
| H221 | -2.317556446  | -4.343101270 | -1.035436183  |
| H222 | -3.830126054  | 2.603677012  | 3.079683378   |
| H223 | -3.010735277  | 0.523136030  | 1.365958583   |
| H224 | -8.139748341  | 0.779233648  | 3.812325952   |
| H225 | -7.263264453  | -0.074690521 | 1.086585510   |
| H226 | -6.927205548  | 4.080871485  | 2.359955641   |
| H227 | -8.322094889  | 8.739378859  | 4.399283502   |
| H228 | -6.907169530  | 5.231447033  | 5.316316815   |
| H229 | -8.930187585  | 5.427155372  | 3.415032108   |
| H230 | -6.266157003  | 6.835963544  | 2.765443324   |
| H231 | -10.876902390 | 9.514731054  | 1.111445867   |
| H232 | -3.260395392  | 4.246265687  | 1.291215867   |
| H233 | -4.815464057  | 3.966649403  | 0.495288444   |
| H234 | -9.833921024  | 10.444732194 | 3.249762776   |
| H235 | -8.356956654  | 5.645927563  | 1.760862258   |
| H236 | -6.172430481  | 2.012086096  | 1.377832565   |

|      |               |               |               |
|------|---------------|---------------|---------------|
| H237 | -7.017865004  | -0.552318563  | 3.526949881   |
| H238 | -9.873002204  | 1.909047602   | -0.213075572  |
| H239 | -2.202707052  | 1.503132627   | -2.690825718  |
| H240 | -10.211346416 | 0.169451313   | -0.140886620  |
| H241 | 10.299188389  | 3.208450920   | 2.688955366   |
| H242 | 8.692206397   | 3.312504434   | 2.414536082   |
| H243 | 1.546373558   | 5.975122178   | -1.430843316  |
| H244 | -0.717321796  | 5.495702787   | 0.282147156   |
| H245 | 1.735214586   | 8.069549531   | 0.309870463   |
| H246 | -3.438433625  | 3.538365054   | -1.609323671  |
| H247 | -5.112186700  | 4.157808027   | -2.785154135  |
| H248 | -6.711968346  | 3.389937640   | -4.160033703  |
| H249 | -4.797406545  | 5.408593558   | -1.850568865  |
| H250 | -5.537684194  | 1.245886701   | -4.064992857  |
| H251 | -7.318077754  | 1.274964171   | -3.860827743  |
| H252 | -0.064184435  | 11.615198246  | -1.870263747  |
| H253 | -1.256058571  | 12.917854728  | -1.687382412  |
| H254 | -0.909659880  | 10.167624547  | -3.317176406  |
| H255 | -2.582181266  | 9.608174319   | -3.282519122  |
| H256 | -3.675035894  | 9.209584119   | -6.022588334  |
| H257 | -2.647517067  | 4.849573692   | -5.747877455  |
| H258 | -7.295152538  | 8.662235062   | -0.537285169  |
| H259 | -3.088084357  | 8.565419138   | 2.111712025   |
| H260 | -4.701760728  | 7.765450258   | -2.963771677  |
| H261 | 1.064201795   | 5.381208398   | -3.886619612  |
| H262 | 2.342017911   | 7.199599268   | -3.235493270  |
| H263 | -1.394360416  | 4.885702429   | -3.350238508  |
| H264 | -8.364444639  | -0.223731637  | -1.473377729  |
| H265 | 3.641276856   | 10.004988496  | -4.147552252  |
| H266 | -6.091644216  | -0.956582481  | -3.056001654  |
| H267 | 0.536169893   | 6.364240278   | -5.248703918  |
| H268 | -3.389109308  | 6.987250703   | 0.248441083   |
| H269 | 3.341791046   | 10.315735449  | -2.424184188  |
| H270 | -2.926972446  | 7.780848918   | -6.659252575  |
| H271 | -5.102577503  | 8.949521878   | -4.162594607  |
| H272 | -5.172259782  | -3.518327437  | -3.432894816  |
| H273 | -5.756425185  | -3.338509891  | -0.783217268  |
| H274 | -6.937403420  | 10.333221443  | 1.256123781   |
| H275 | -5.255746809  | 1.391064182   | -1.591956618  |
| H276 | -0.488214227  | 8.024658586   | -3.699113546  |
| H277 | -1.738433348  | 6.342180083   | -5.998734129  |
| H278 | -0.676591838  | 4.205172051   | -4.803518706  |
| H279 | -3.603700482  | 5.871054810   | -3.678347352  |
| H280 | 0.813041572   | 8.931300334   | 2.939114242   |
| H281 | -0.459063728  | 9.759719907   | 0.100604430   |
| H282 | -0.088740115  | 12.626552763  | 0.374210309   |
| H283 | 2.279485307   | 9.447085059   | 2.070706113   |
| H284 | -2.445563158  | 10.650291015  | 1.728543964   |
| H285 | 4.607772265   | -3.022955252  | -9.148949719  |
| H286 | 4.587933895   | -4.487180991  | -8.146150722  |
| H287 | 7.871911938   | -5.174326284  | -5.069634624  |
| H288 | 5.048948478   | -5.086035369  | -10.416540933 |
| H289 | 3.512875767   | -5.575106264  | -10.128192031 |
| H290 | 5.494087215   | 4.778328928   | -0.952731595  |
| H291 | 5.708421427   | 7.430114702   | 0.539692616   |
| H292 | 4.827812091   | 8.093778560   | -3.590206631  |
| H293 | 4.101996513   | 5.596239247   | -0.179782776  |
| H294 | 6.810812389   | 8.032119139   | -0.508695879  |
| H295 | 5.380598851   | 2.875831520   | -6.731440471  |
| H296 | 5.979746886   | 6.765340193   | -2.304812331  |
| H297 | 5.296578807   | -7.011401913  | 4.978255199   |
| H298 | 7.051545680   | -7.878898648  | 2.616087237   |
| H299 | 3.641098777   | 1.404825988   | -6.781015888  |
| H300 | 5.152363018   | -0.095782485  | 3.276657026   |
| H301 | 0.560484106   | 1.550221785   | -8.640918580  |
| H302 | -1.092933578  | -2.146452319  | -4.438864898  |
| H303 | 0.472342788   | 2.059232031   | -6.952500791  |
| H304 | 4.264498755   | -4.494307725  | 4.505305442   |
| H305 | 2.137120068   | 0.027460076   | -6.579436114  |
| H306 | 3.924953459   | -5.069393515  | 2.867052507   |
| H307 | 4.767674620   | -7.301126933  | 3.303703989   |
| H308 | 6.411227208   | -5.478714313  | 2.558136106   |
| H309 | 6.662178358   | -5.067322931  | 4.261748649   |
| H310 | -5.211878613  | -0.807331549  | -6.396457845  |
| H311 | 5.927854767   | -9.454545594  | 4.897179364   |
| H312 | 4.982870543   | -11.773199942 | 3.165259654   |
| H313 | 0.252072704   | -0.042587238  | -4.279450920  |
| H314 | 6.332942480   | -11.779976911 | 5.757235580   |
| H315 | 4.776689056   | -12.136472492 | 5.393989867   |
| H316 | 5.525926896   | -3.332584488  | 2.045700801   |

|       |              |               |              |
|-------|--------------|---------------|--------------|
| H317  | -0.743519231 | 2.116154196   | -4.912441306 |
| H318  | -3.362915061 | -2.077284121  | -5.442425406 |
| H319  | 7.621275925  | -9.937009054  | -1.667821636 |
| H320  | 6.631967452  | -7.665369069  | -3.773502124 |
| H321  | 6.622201444  | -8.182493549  | -0.099497432 |
| H322  | 6.757749305  | -10.542357511 | -2.812634598 |
| H323  | 4.949430337  | 2.539831224   | -9.496611736 |
| H324  | 6.351382999  | -5.062173422  | -0.219975821 |
| H325  | 2.287377806  | -7.794712287  | 0.840773044  |
| H326  | 3.283856339  | -2.023601333  | -7.603987922 |
| H327  | 3.037449991  | -9.236144715  | -0.856434401 |
| H328  | 3.074728790  | -6.921414469  | -7.008662793 |
| H329  | 2.249045518  | -5.466731166  | -5.115798205 |
| H330  | 6.591547530  | -12.420255301 | 3.514900797  |
| H331  | 5.743893643  | -1.059759273  | 1.954871208  |
| H332  | 8.362800745  | -5.800517597  | 0.792971256  |
| H333  | 7.226546078  | -3.782336999  | -0.150017026 |
| H334  | 8.971551394  | -6.852580929  | 2.796147246  |
| H335  | 3.716069241  | -2.714264694  | 5.147294372  |
| H336  | 3.739103768  | -8.290806303  | -3.684198339 |
| H337  | 4.958553889  | -8.596715790  | -2.442676575 |
| H338  | 1.899360201  | -8.689643060  | -2.097488890 |
| H339  | 1.346951445  | -2.167756796  | -6.143628556 |
| H340  | -3.027609209 | 2.194462325   | -5.947437962 |
| H341  | -5.151133889 | 0.970073971   | -6.548717643 |
| H342  | 2.313100024  | -6.029217650  | 0.643115657  |
| H343  | 8.506643005  | -7.335765909  | 0.582974116  |
| H344  | 7.414408710  | -9.255405774  | 0.674446672  |
| H345  | 4.153300364  | -1.050182469  | 5.112501092  |
| H346  | 5.535787899  | -7.596064106  | -6.710986138 |
| H347  | 6.534391594  | -6.041681918  | -3.112618790 |
| H348  | 0.459243760  | -2.948718357  | -7.485731467 |
| H349  | 4.245245881  | 4.205562868   | -7.046999143 |
| H350  | 7.763392409  | 0.148395113   | 3.967400878  |
| H351  | 7.787440934  | 0.557852905   | 2.237392297  |
| H352  | 8.984879811  | -6.729925094  | -6.440095729 |
| H353  | 8.262086656  | -8.017639169  | -5.732871406 |
| H354  | 10.305994208 | -8.573332808  | -1.683752610 |
| H355  | 8.551317952  | -8.227099276  | -3.097873957 |
| H356  | 11.698877699 | -7.549586272  | -3.825387988 |
| H357  | 10.172085567 | -6.858028631  | -1.246061694 |
| H358  | 10.546254784 | 0.310185611   | 2.205394051  |
| H359  | -2.976256779 | 13.190795917  | 3.726607905  |
| H360  | 10.200810525 | -6.865130764  | 5.542657337  |
| H361  | 9.572333080  | -4.440397481  | 4.390415768  |
| H362  | -4.712372808 | 12.320681129  | 1.404890448  |
| H363  | -4.087755635 | 10.299139426  | 3.646100532  |
| H364  | -5.680112180 | 10.993144898  | 3.291954864  |
| H365  | 1.084278758  | -3.288146055  | -1.029357755 |
| H366  | 3.716506185  | -1.041817731  | 0.181804583  |
| H367  | -6.456098635 | 6.804676340   | -1.565932870 |
| H368  | 0.127064298  | -0.966995867  | -0.559222659 |
| H369  | -2.000765445 | -0.241044353  | -0.865680657 |
| Mo370 | 3.829796893  | -4.412448015  | -2.380874403 |
| N371  | -7.059486844 | -7.196390840  | -0.349362597 |
| N372  | -8.768090199 | -4.622904897  | 1.763117950  |
| N373  | -8.084774604 | -4.916108381  | 4.472075917  |
| N374  | -5.403307089 | -5.775403737  | 4.477681351  |
| N375  | -4.178986753 | -3.371478365  | 3.584263882  |
| N376  | -4.860851911 | -1.727807031  | 5.849730190  |
| N377  | -3.632750058 | -3.042947031  | 8.100683105  |
| N378  | -1.117140123 | -4.503208446  | 7.547694127  |
| N379  | 0.194542132  | -2.593843433  | 6.126455481  |
| N380  | -0.386107250 | 0.342876126   | 6.774314518  |
| N381  | -0.652724447 | 0.199797594   | 9.669008642  |
| N382  | 5.541187817  | -11.495642768 | 5.175631498  |
| N383  | 6.384603097  | -9.252259481  | 4.001652017  |
| N384  | 5.042208948  | -3.305217877  | 2.946933359  |
| N385  | 4.306658685  | -1.983224827  | 4.738764281  |
| N386  | 5.383405319  | -1.018476004  | 2.919729097  |
| N387  | 9.037954463  | -6.960916589  | 3.832630200  |
| N388  | -5.856160164 | -2.948047923  | -2.901485091 |
| N389  | -1.953172171 | -5.606330195  | -3.192529986 |
| N390  | -6.078317350 | -0.447061055  | -2.156122388 |
| N391  | -8.353006166 | 0.642428564   | -0.939101750 |
| N392  | -7.852474471 | 0.350205808   | 1.810151855  |
| N393  | -5.688705182 | 2.081918805   | 2.277662087  |
| N394  | -3.123232464 | 2.672860088   | -1.100553473 |
| N395  | -2.460892090 | 0.658770485   | -0.718514690 |
| N396  | -6.321429988 | 4.728207734   | 2.858342493  |

|      |              |               |               |
|------|--------------|---------------|---------------|
| N397 | -9.778694992 | 7.719563188   | 1.583519315   |
| N398 | -9.671399497 | 9.505663295   | 2.895775760   |
| N399 | 9.478886601  | 2.657611934   | 2.423910112   |
| N400 | 6.275374095  | 7.189987044   | -0.279950834  |
| N401 | 4.210962876  | 8.459563922   | -2.869646079  |
| N402 | 1.553757236  | 7.847107001   | -3.340246358  |
| N403 | -3.174761717 | 6.401914664   | -4.457752269  |
| N404 | -3.358074474 | 8.256803967   | -5.875433336  |
| N405 | -4.455092396 | 8.236565993   | -3.837716966  |
| N406 | 0.652361424  | 6.332733732   | -1.060984867  |
| N407 | 0.975410108  | 8.231484318   | 0.977144976   |
| N408 | -0.366919586 | 10.614114501  | 0.649296372   |
| N409 | -1.887171796 | 10.308602954  | -3.031551614  |
| N410 | -2.752795537 | 11.619301077  | 1.701842112   |
| N411 | 4.099893055  | -4.744756271  | -10.248597470 |
| N412 | 2.465156382  | -2.579200312  | -7.866819029  |
| N413 | 1.434712140  | 0.218747454   | -7.313875340  |
| N414 | 3.500448113  | 2.244075489   | -7.350167205  |
| N415 | -1.725276929 | -2.987716406  | -10.056529358 |
| N416 | -3.294596968 | -1.179945043  | -8.476046004  |
| N417 | 8.120442100  | -7.033940870  | -5.982961491  |
| N418 | 4.253848340  | -5.668997625  | -4.339340316  |
| N419 | 3.668016193  | -6.609685238  | -6.244662779  |
| N420 | 9.225800073  | -7.458646954  | -3.057387605  |
| N421 | 0.114614154  | 2.249527116   | -0.077745900  |
| N422 | 2.674640146  | -0.560180544  | 0.371754883   |
| N423 | 0.959844074  | 1.722376199   | -0.607286471  |
| N424 | 1.833945124  | -1.153388705  | 0.942552246   |
| O425 | -6.556361767 | -5.145340417  | 1.615932657   |
| O426 | -7.233702372 | -2.800198784  | 4.483734542   |
| O427 | -5.245629183 | -5.172028875  | 6.673961083   |
| O428 | -2.454243635 | -3.935595736  | 4.962950715   |
| O429 | -3.044601627 | -0.468151486  | 5.323688244   |
| O430 | -3.287454050 | -0.945696284  | 8.956517270   |
| O431 | -0.516176536 | -3.922375073  | 9.679023627   |
| O432 | 2.188787072  | -3.746615511  | 6.161981512   |
| O433 | 1.891668234  | 0.215652619   | 6.629345626   |
| O434 | 0.879820786  | 1.875206042   | 9.674694319   |
| O435 | 1.565278748  | -0.233461797  | 12.456866426  |
| O436 | 7.058012895  | -10.330296022 | 2.069829445   |
| O437 | 8.007555438  | -7.664519688  | 5.764290925   |
| O438 | 11.600893430 | -4.550933869  | 4.561031736   |
| O439 | -5.616607133 | -0.846958520  | 0.055325130   |
| O440 | -3.690161703 | -4.387462714  | -4.012441953  |
| O441 | -7.136738322 | 2.495989817   | -0.389108805  |
| O442 | -6.339244730 | 3.042129568   | -3.330253504  |
| O443 | -9.787253765 | 1.486401368   | 2.294195390   |
| O444 | -5.663710772 | 1.530758385   | 4.494536224   |
| O445 | -4.258921775 | 5.037676850   | 3.789619260   |
| O446 | -6.584788841 | 7.247485660   | 5.332831037   |
| O447 | 10.753355750 | -0.110214117  | 4.193507794   |
| O448 | 3.552843061  | 4.685169149   | 3.953627658   |
| O449 | 3.601732901  | 8.383123703   | -0.674513316  |
| O450 | 0.987300771  | 10.069715251  | -3.519682489  |
| O451 | -1.412121916 | 7.192433935   | -1.530538604  |
| O452 | -0.697787596 | 7.197799644   | 2.161089897   |
| O453 | 2.422499537  | 5.700533174   | 1.459530922   |
| O454 | 0.858468085  | 11.624937482  | 2.300232196   |
| O455 | -2.508215256 | 13.587383032  | 0.577347736   |
| O456 | -3.268842968 | 10.989380369  | -1.342644149  |
| O457 | -4.947630038 | 13.711766063  | 3.623726067   |
| O458 | -5.509749618 | 6.834196724   | -1.325338684  |
| O459 | 1.757884888  | -4.571170617  | -8.767032065  |
| O460 | -0.271107092 | -0.738026190  | -8.510913153  |
| O461 | 2.109033378  | 3.598410313   | -8.531567901  |
| O462 | 5.885667991  | 4.311432381   | -9.108681389  |
| O463 | -5.009170608 | -2.638945829  | -8.832760865  |
| O464 | -1.456028884 | -6.607792905  | -6.012172225  |
| O465 | 0.463075311  | -5.773764416  | -6.787467714  |
| O466 | -3.996278081 | 2.320553500   | -8.406579950  |
| O467 | 9.938892733  | -5.405871987  | -3.701458232  |
| O468 | 12.654812174 | -6.979398672  | -2.114063920  |
| O469 | 0.282303158  | -6.301372878  | -1.318725454  |
| O470 | -0.258200886 | -7.408011626  | 0.560379780   |
| O471 | 5.129245116  | -10.904073714 | -3.350298023  |
| O472 | 2.867874146  | -10.949840087 | -3.346151746  |
| O473 | 5.076809001  | -5.852874389  | -1.284009367  |
| O474 | 5.011159869  | -7.575430919  | 0.156895328   |
| O475 | 2.607035466  | -6.119474452  | -2.071167556  |
| O476 | 8.948528866  | -6.560634939  | 1.030142979   |



|                                    |                                   |               |               |              |
|------------------------------------|-----------------------------------|---------------|---------------|--------------|
|                                    | O477                              | 6.979205532   | -4.569441683  | 0.371304195  |
|                                    | O478                              | -4.379482878  | 4.744665723   | -2.453724378 |
|                                    | O479                              | 7.709013140   | -10.434405696 | -2.511207372 |
|                                    | O480                              | 7.509579758   | -8.633067344  | -0.090678846 |
|                                    | S481                              | 3.582139296   | 4.970207173   | -2.471213214 |
|                                    | S482                              | 2.102699325   | 1.944562848   | -3.409106267 |
|                                    | S483                              | 2.069453183   | -3.405584884  | -3.632098442 |
|                                    | S484                              | 3.879790164   | 1.952111535   | -0.330969943 |
|                                    | S485                              | 0.550067183   | -0.850856507  | -1.858533628 |
|                                    | S486                              | 4.034173270   | -0.801685954  | -5.534808940 |
|                                    | S487                              | 3.400445400   | -3.518513976  | -0.214545707 |
|                                    | S488                              | 5.670060770   | 1.680665719   | -3.342862266 |
|                                    | S489                              | 5.677217169   | -3.073335577  | -3.019959856 |
|                                    | S490                              | 6.326410791   | -0.859230339  | -0.337435455 |
|                                    | end                               |               |               |              |
| product <b>Fe2-NH-NH-b</b> (S=3/2) | <b>bm52exp335fe2captgfe.car_8</b> |               |               |              |
| Fe( 139) -2.282                    | C1                                | -7.721286179  | -5.351656198  | 1.294045201  |
| Fe( 140) 0.074                     | C2                                | -8.053320278  | -6.513299232  | 0.350157161  |
| Fe( 141) -2.537                    | C3                                | -8.635875864  | -3.469374434  | 2.582681114  |
| Fe( 142) 2.756                     | C4                                | -8.008588737  | -3.736869922  | 3.949195159  |
| Fe( 143) 3.159                     | C5                                | -7.605778978  | -5.343513669  | 5.750267501  |
| Fe( 144) 2.189                     | C6                                | -6.079685160  | -5.461699389  | 5.698405679  |
| Fe( 145) -0.927                    | C7                                | -4.094232931  | -5.774215002  | 4.314961404  |
|                                    | C8                                | -3.546571124  | -4.345525146  | 4.361707261  |
|                                    | C9                                | -3.926863885  | -2.002983512  | 3.737134439  |
|                                    | C10                               | -3.935909396  | -1.403955260  | 5.150872361  |
|                                    | C11                               | -4.968584772  | -1.265560226  | 7.325015418  |
|                                    | C12                               | -3.886755345  | -1.839931921  | 8.252696268  |
|                                    | C13                               | -2.872780683  | -3.875181926  | 9.170777017  |
|                                    | C14                               | -1.393325273  | -4.118893290  | 8.838682264  |
|                                    | C15                               | 0.267175951   | -4.686369269  | 7.109023352  |
|                                    | C16                               | 0.991652211   | -3.554932203  | 6.375611290  |
|                                    | C17                               | 0.657214195   | -1.288207590  | 5.387156022  |
|                                    | C18                               | 0.782241900   | -0.071067978  | 6.320210671  |
|                                    | C19                               | -0.253732230  | -1.076278961  | 4.160663409  |
|                                    | C20                               | 0.090334839   | 0.238133199   | 3.454070200  |
|                                    | C21                               | -0.191412789  | -2.312151222  | 3.253057880  |
|                                    | C22                               | -0.394119044  | 1.627230762   | 7.657048406  |
|                                    | C23                               | -0.040335923  | 1.262423192   | 9.110648510  |
|                                    | C24                               | -1.734324009  | 2.389527084   | 7.528432548  |
|                                    | C25                               | -1.813121977  | 3.547495413   | 8.528855521  |
|                                    | C26                               | -1.925107602  | 2.906179723   | 6.095876687  |
|                                    | C27                               | -0.445269058  | -0.142533316  | 11.043197823 |
|                                    | C28                               | 1.020280501   | -0.415120319  | 11.318163252 |
|                                    | C29                               | 5.879318168   | -11.628841620 | 3.689099989  |
|                                    | C30                               | 6.515077154   | -10.348804289 | 3.159863923  |
|                                    | C31                               | 6.817947874   | -7.937261288  | 3.686218218  |
|                                    | C32                               | 8.044127952   | -7.547193923  | 4.531009404  |
|                                    | C33                               | 5.640052943   | -6.980379686  | 3.934111808  |
|                                    | C34                               | 5.965222295   | -5.537304060  | 3.556052388  |
|                                    | C35                               | 4.710066025   | -4.669382396  | 3.484387944  |
|                                    | C36                               | 4.862365752   | -2.166121060  | 3.480334291  |
|                                    | C37                               | 10.285111035  | -6.552104744  | 4.464972968  |
|                                    | C38                               | 10.461136168  | -5.049989334  | 4.467827612  |
|                                    | C39                               | -5.325222460  | -2.664471069  | -1.587692197 |
|                                    | C40                               | -5.689042833  | -1.230058729  | -1.159000238 |
|                                    | C41                               | -3.789073148  | -2.811156891  | -1.525209253 |
|                                    | C42                               | -3.241375412  | -4.248520625  | -1.639606060 |
|                                    | C43                               | -2.981664822  | -4.747746878  | -3.061546938 |
|                                    | C44                               | -6.161004023  | 1.008997080   | -2.071734693 |
|                                    | C45                               | -7.246821375  | 1.474266418   | -1.090785521 |
|                                    | C46                               | -6.337013770  | 1.614023068   | -3.470068185 |
|                                    | C47                               | -9.406021856  | 0.973299292   | -0.045547027 |
|                                    | C48                               | -9.009490648  | 0.971587843   | 1.433972795  |
|                                    | C49                               | -7.310301961  | 0.412874523   | 3.109066438  |
|                                    | C50                               | -6.122740074  | 1.351062757   | 3.327818142  |
|                                    | C51                               | -4.599628367  | 3.035453219   | 2.417424302  |
|                                    | C52                               | -5.029731095  | 4.350407224   | 3.113472754  |
|                                    | C53                               | -4.002895357  | 3.458799637   | 1.066465139  |
|                                    | C54                               | -3.359200668  | 2.397409796   | 0.235469661  |
|                                    | C55                               | -2.877289147  | 1.137456892   | 0.487390368  |
|                                    | C56                               | -2.456191099  | 1.598983790   | -1.649198411 |
|                                    | C57                               | -6.826875793  | 6.033932880   | 3.255958916  |
|                                    | C58                               | -6.703249143  | 6.204504820   | 4.769010644  |
|                                    | C59                               | -8.310824446  | 6.095625505   | 2.821839605  |
|                                    | C60                               | -8.919957582  | 7.461549811   | 2.694370370  |
|                                    | C61                               | -8.859968713  | 8.562082087   | 3.527288171  |
|                                    | C62                               | -10.136665690 | 8.995458376   | 1.768960462  |
|                                    | C63                               | 9.253105661   | 1.653097393   | 3.401354840  |
|                                    | C64                               | 10.296444550  | 0.565344697   | 3.223702158  |

|       |              |               |              |
|-------|--------------|---------------|--------------|
| C65   | 7.863648767  | 0.992116570   | 3.215779537  |
| C66   | 6.723581868  | 1.960325654   | 3.428094930  |
| C67   | 6.125677960  | 2.129308521   | 4.689513687  |
| C68   | 6.243102637  | 2.744563438   | 2.363068683  |
| C69   | 5.083155862  | 3.043601194   | 4.885075747  |
| C70   | 5.221100556  | 3.674871467   | 2.547029251  |
| C71   | 4.634848394  | 3.817858576   | 3.807213744  |
| C72   | 5.384762976  | 6.866615681   | -1.438811240 |
| C73   | 4.328391475  | 7.968703716   | -1.635605895 |
| C74   | 4.708112052  | 5.529557157   | -1.154652085 |
| C75   | 3.302121960  | 9.549404500   | -3.233379027 |
| C76   | 1.828165581  | 9.165870197   | -3.396058192 |
| C77   | 0.211283857  | 7.266863901   | -3.351828118 |
| C78   | -0.246927656 | 6.921978951   | -1.911296362 |
| C79   | 0.241868265  | 6.020178731   | -4.265381932 |
| C80   | -1.009281075 | 5.139543392   | -4.369253588 |
| C81   | -2.159461314 | 5.676530578   | -5.237049521 |
| C82   | -3.687023954 | 7.588401425   | -4.754042311 |
| C83   | 0.287834214  | 5.955263498   | 0.273043616  |
| C84   | 0.122399088  | 7.163675240   | 1.206300733  |
| C85   | 1.297541261  | 4.988512109   | 0.925720438  |
| C86   | 1.188090730  | 9.229762404   | 1.971751512  |
| C87   | 0.552528528  | 10.580760915  | 1.675322126  |
| C88   | -0.839356666 | 11.874738348  | 0.145569730  |
| C89   | -2.115696915 | 12.428318787  | 0.821914970  |
| C90   | -0.983721121 | 11.887638345  | -1.379010845 |
| C91   | -2.142089675 | 11.046335792  | -1.902397283 |
| C92   | -4.064563070 | 11.946060778  | 2.223541018  |
| C93   | -3.981502040 | 13.054479859  | 3.264849939  |
| C94   | -4.725341233 | 10.682811136  | 2.840843200  |
| C95   | -4.965486365 | 9.608547723   | 1.805476648  |
| C96   | -6.136725729 | 9.617630627   | 1.033250661  |
| C97   | -4.007456882 | 8.615992664   | 1.544354265  |
| C98   | -6.338531968 | 8.682280627   | 0.017281289  |
| C99   | -4.180967870 | 7.685726529   | 0.514971202  |
| C100  | -5.346904856 | 7.736258816   | -0.243195365 |
| C101  | 4.074994535  | -3.999761945  | -9.004186296 |
| C102  | 2.651358415  | -3.731306143  | -8.548638091 |
| C103  | 1.204616163  | -2.169355205  | -7.269672027 |
| C104  | 0.703015165  | -0.823590571  | -7.803474041 |
| C105  | 1.092730901  | 1.605529036   | -7.759636377 |
| C106  | 2.278623766  | 2.547837648   | -7.953800982 |
| C107  | 4.573275192  | 3.174005322   | -7.453204808 |
| C108  | 5.094191978  | 3.411448387   | -8.856521863 |
| C109  | -2.740713353 | -3.496895328  | -9.174994002 |
| C110  | -3.762551089 | -2.397937189  | -8.856971077 |
| C111  | -2.254368338 | -4.160844874  | -7.866258650 |
| C112  | -1.542172892 | -5.495854509  | -8.153896605 |
| C113  | -0.879089392 | -6.028047864  | -6.904657110 |
| C114  | -4.160343056 | -0.077529379  | -8.203352311 |
| C115  | -3.685470709 | 1.204866883   | -8.855499074 |
| C116  | -4.537752369 | 0.053566853   | -6.707490559 |
| C117  | -3.310118511 | 0.049281485   | -5.841056223 |
| C118  | -2.565476575 | 1.224501698   | -5.637803200 |
| C119  | -2.809324151 | -1.167613416  | -5.349513705 |
| C120  | -1.310317856 | 1.161257637   | -5.023453301 |
| C121  | -1.558982993 | -1.226455160  | -4.728402822 |
| C122  | -0.793099288 | -0.064485628  | -4.595083968 |
| C123  | 7.942514404  | -6.287810227  | -4.809386065 |
| C124  | 9.111108650  | -6.345406906  | -3.812654701 |
| C125  | 6.622319045  | -6.589220564  | -4.084090897 |
| C126  | 5.368408742  | -6.403641384  | -4.875153341 |
| C127  | 5.016808518  | -7.026384506  | -6.055024218 |
| C128  | 3.273450874  | -5.906544900  | -5.276122954 |
| C129  | 10.317215655 | -7.545659437  | -2.091775895 |
| C130  | 11.676317833 | -7.330057007  | -2.721565832 |
| C131  | 0.629705519  | -6.837386416  | -0.206968802 |
| C132  | 2.121010681  | -6.876014175  | 0.105290835  |
| C133  | 3.033223713  | -7.029488628  | -1.148119800 |
| C134  | 2.952746749  | -8.483080787  | -1.685166952 |
| C135  | 3.995134946  | -8.846934111  | -2.745519613 |
| C136  | 4.012172689  | -10.341539397 | -3.135830729 |
| C137  | 4.488129326  | -6.744965608  | -0.745333143 |
| C138  | 3.595899919  | -0.692890739  | -2.244994686 |
| Fe139 | 3.830172073  | -1.976190645  | -3.808403623 |
| Fe140 | 2.161208435  | 0.408928626   | -1.175960277 |
| Fe141 | 4.986187569  | 0.509146219   | -1.490631859 |
| Fe142 | 3.753555500  | 0.559646437   | -3.764519755 |
| Fe143 | 3.804348213  | 2.750620725   | -2.325554661 |
| Fe144 | 4.791160673  | -2.051464226  | -1.457126768 |

|       |              |              |               |
|-------|--------------|--------------|---------------|
| Fe145 | 2.221732583  | -2.268300353 | -1.826147770  |
| H146  | -6.253499067 | -7.475967496 | 0.394482477   |
| H147  | -6.434139441 | -6.495183061 | -0.898342101  |
| H148  | -9.717042738 | -4.845338354 | 1.357505053   |
| H149  | -8.766664883 | -6.158354188 | -0.411234431  |
| H150  | -8.599790677 | -7.260274982 | 0.952137850   |
| H151  | -7.998036004 | -2.723180094 | 2.086564900   |
| H152  | -8.774289160 | -5.637551141 | 3.967754457   |
| H153  | -9.624575571 | -3.016748852 | 2.739311095   |
| H154  | -8.026299187 | -6.307542804 | 6.064725268   |
| H155  | -6.130010034 | -5.861467410 | 3.677982228   |
| H156  | -7.836226508 | -4.602135414 | 6.526318358   |
| H157  | -2.923132693 | -1.837705253 | 3.326624795   |
| H158  | -5.090823229 | -3.706938036 | 3.158424535   |
| H159  | -3.856578784 | -6.229241050 | 3.343886135   |
| H160  | -4.821246208 | -0.177679289 | 7.301783128   |
| H161  | -5.720406123 | -2.339912698 | 5.606681958   |
| H162  | -3.586470025 | -6.346314186 | 5.100445732   |
| H163  | -4.645566513 | -1.461521676 | 3.106582796   |
| H164  | -4.275233506 | -3.742433903 | 7.558709484   |
| H165  | -5.954185723 | -1.479774680 | 7.761351934   |
| H166  | -0.591721846 | -3.197632156 | 3.765612204   |
| H167  | -0.800788102 | -2.155962629 | 2.347063934   |
| H168  | 0.837000424  | -2.521790838 | 2.929922345   |
| H169  | -1.283138029 | -0.986953364 | 4.534628474   |
| H170  | -3.331282136 | -4.856793029 | 9.363416117   |
| H171  | -1.938860619 | 2.091956982  | 5.358779425   |
| H172  | -1.479117412 | -0.247273896 | 9.183139867   |
| H173  | -1.768998478 | 3.204532427  | 9.572103726   |
| H174  | 1.140023964  | 0.264176414  | 3.136009865   |
| H175  | -0.092917204 | 1.101431582  | 4.107204031   |
| H176  | 9.322478758  | 2.008942963  | 4.446981708   |
| H177  | -2.879725903 | 3.444325567  | 6.007752855   |
| H178  | -2.758307428 | 4.091665312  | 8.388902328   |
| H179  | -1.115169579 | 3.604870753  | 5.828768873   |
| H180  | -0.985292233 | 4.256570461  | 8.369506972   |
| H181  | -2.549571441 | 1.678178804  | 7.754925474   |
| H182  | 0.425031100  | 2.286688626  | 7.332703303   |
| H183  | -1.279497507 | 0.098001677  | 6.434656080   |
| H184  | -0.535016663 | 0.366972917  | 2.559662130   |
| H185  | 1.591243216  | 4.229727920  | 0.184241196   |
| H186  | 0.774832894  | 4.484823296  | 1.751561660   |
| H187  | 2.693239709  | 5.316585416  | 2.280501759   |
| H188  | 3.235082929  | 4.693909424  | 4.827919903   |
| H189  | 4.851798008  | 4.267964362  | 1.709652426   |
| H190  | 6.661019857  | 2.608817356  | 1.362998966   |
| H191  | 6.473012488  | 1.531960645  | 5.537640921   |
| H192  | -0.730079887 | -2.502157705 | 6.457519631   |
| H193  | 0.262304542  | -5.555974318 | 6.436201391   |
| H194  | 0.861606692  | -4.947137663 | 7.993820959   |
| H195  | -1.829500802 | -4.429648426 | 6.825234030   |
| H196  | -2.883498457 | -3.299592140 | 10.104513639  |
| H197  | 4.618181001  | 3.148560945  | 5.869302368   |
| H198  | 1.677819447  | -1.491385217 | 5.041090491   |
| H199  | -0.796160659 | 0.631565202  | 11.745584094  |
| H200  | -0.993771766 | -1.072860746 | 11.259364426  |
| H201  | 1.615282588  | -0.751299783 | 10.437350197  |
| H202  | 11.166945643 | -7.020718763 | 4.000921099   |
| H203  | -1.746892523 | -5.975746204 | -4.138417033  |
| H204  | 1.261542204  | -6.009555307 | -1.831588287  |
| H205  | -2.284607545 | -6.234503917 | -8.488361986  |
| H206  | -0.798733236 | -5.362626291 | -8.952788572  |
| H207  | -3.107900626 | -4.346705395 | -7.195886085  |
| H208  | -3.092851019 | 1.050548176  | -9.788274153  |
| H209  | -3.334753233 | -4.245483439 | -9.721850840  |
| H210  | -3.341553639 | -2.180255846 | -2.310985893  |
| H211  | -3.944897844 | -4.959969358 | -1.173683572  |
| H212  | -2.250847624 | -1.024233269 | -8.473267567  |
| H213  | -5.099764350 | -0.313013283 | -8.746472159  |
| H214  | -1.020351997 | -2.416130693 | -9.613723353  |
| H215  | -1.294320818 | -5.810995021 | -2.444578434  |
| H216  | -1.587390612 | -3.462068197 | -7.337673757  |
| H217  | -1.190887973 | -3.802105328 | -10.487432332 |
| H218  | -6.742896731 | -3.438972739 | -2.876253687  |
| H219  | -3.464844233 | -2.404763410 | -0.555861725  |
| H220  | 0.814117075  | -5.278483339 | -7.556268084  |
| H221  | -2.311855168 | -4.324267545 | -1.057364906  |
| H222  | -3.834721842 | 2.585718485  | 3.066210548   |
| H223  | -2.885180324 | 0.542024692  | 1.390962302   |
| H224  | -8.117543760 | 0.758875066  | 3.769286838   |

|      |               |              |               |
|------|---------------|--------------|---------------|
| H225 | -7.254100567  | -0.067871224 | 1.031031864   |
| H226 | -6.929945980  | 4.074679366  | 2.392650953   |
| H227 | -8.337209522  | 8.744751641  | 4.458976213   |
| H228 | -6.848046684  | 5.254149014  | 5.339434757   |
| H229 | -8.908575384  | 5.459422355  | 3.498466780   |
| H230 | -6.248003772  | 6.830169345  | 2.762482635   |
| H231 | -10.788040619 | 9.552182794  | 1.101218548   |
| H232 | -3.250605994  | 4.235225637  | 1.280254346   |
| H233 | -4.793210958  | 3.938172666  | 0.466553902   |
| H234 | -9.802295551  | 10.464877600 | 3.273794613   |
| H235 | -8.380119466  | 5.635444665  | 1.823341935   |
| H236 | -6.182752999  | 2.032542392  | 1.358749795   |
| H237 | -7.020192408  | -0.587495488 | 3.462377535   |
| H238 | -9.832603527  | 1.966338404  | -0.245608666  |
| H239 | -2.104663950  | 1.505607589  | -2.674551328  |
| H240 | -10.203720641 | 0.232860314  | -0.189534360  |
| H241 | 10.300194100  | 3.246446303  | 2.654361128   |
| H242 | 8.691282117   | 3.341724886  | 2.389150563   |
| H243 | 1.556639538   | 5.965000313  | -1.473021915  |
| H244 | -0.692673994  | 5.457351933  | 0.244431059   |
| H245 | 1.732220504   | 8.055033935  | 0.299677045   |
| H246 | -3.422328827  | 3.501816130  | -1.619613581  |
| H247 | -5.108470056  | 4.159672532  | -2.791009979  |
| H248 | -6.674386789  | 3.396405083  | -4.216400740  |
| H249 | -4.792558743  | 5.400094870  | -1.841607674  |
| H250 | -5.508037574  | 1.259693632  | -4.104758911  |
| H251 | -7.290039226  | 1.278592107  | -3.907621897  |
| H252 | -0.030927678  | 11.596089519 | -1.843059935  |
| H253 | -1.189260521  | 12.928368764 | -1.674632368  |
| H254 | -0.910635033  | 10.214702565 | -3.348800663  |
| H255 | -2.598526515  | 9.707212719  | -3.341809446  |
| H256 | -3.773318825  | 9.146023119  | -6.082541691  |
| H257 | -2.658169033  | 4.844430046  | -5.757133068  |
| H258 | -7.260607386  | 8.694208237  | -0.569708081  |
| H259 | -3.101417033  | 8.545843533  | 2.151616733   |
| H260 | -4.661221698  | 7.785185613  | -2.950002851  |
| H261 | 1.063476146   | 5.377257732  | -3.911158644  |
| H262 | 2.340600276   | 7.197897795  | -3.254110627  |
| H263 | -1.387812218  | 4.869757505  | -3.371032737  |
| H264 | -8.354003372  | -0.189020109 | -1.513729662  |
| H265 | 3.632392436   | 10.017067545 | -4.170633710  |
| H266 | -6.075653627  | -0.945694396 | -3.094465144  |
| H267 | 0.531426658   | 6.358235554  | -5.273833282  |
| H268 | -3.396432197  | 6.962207617  | 0.290169949   |
| H269 | 3.331900456   | 10.315895633 | -2.445477675  |
| H270 | -3.065694794  | 7.701157544  | -6.713292241  |
| H271 | -5.116653873  | 8.930005851  | -4.168304337  |
| H272 | -5.176173244  | -3.526065351 | -3.452589046  |
| H273 | -5.757977978  | -3.322616266 | -0.810783285  |
| H274 | -6.910014622  | 10.364654550 | 1.227185555   |
| H275 | -5.228404850  | 1.395716485  | -1.635939038  |
| H276 | -0.491918679  | 8.020046586  | -3.720085877  |
| H277 | -1.750313867  | 6.340243552  | -6.009260142  |
| H278 | -0.677841877  | 4.199132629  | -4.831675463  |
| H279 | -3.589325047  | 5.870184029  | -3.667749038  |
| H280 | 0.788097306   | 8.881731084  | 2.935912380   |
| H281 | -0.457508320  | 9.755526621  | 0.100412016   |
| H282 | -0.068712991  | 12.616560607 | 0.406169274   |
| H283 | 2.265640811   | 9.404847922  | 2.091719279   |
| H284 | -2.439607191  | 10.644077911 | 1.730540638   |
| H285 | 4.599789178   | -3.048429078 | -9.173668581  |
| H286 | 4.572197764   | -4.490426764 | -8.140145827  |
| H287 | 7.925734037   | -5.248518702 | -5.169372304  |
| H288 | 5.026945442   | -5.140000334 | -10.398214728 |
| H289 | 3.490142831   | -5.616780256 | -10.094226009 |
| H290 | 5.492867317   | 4.773416570  | -1.026118686  |
| H291 | 5.731684406   | 7.414488603  | 0.497206883   |
| H292 | 4.814603228   | 8.094869690  | -3.630360684  |
| H293 | 4.118781855   | 5.599904259  | -0.230139993  |
| H294 | 6.828867582   | 8.027061363  | -0.549436738  |
| H295 | 5.404635858   | 2.764999078  | -6.857034940  |
| H296 | 5.987922644   | 6.772220813  | -2.354857670  |
| H297 | 5.337284370   | -7.048631467 | 4.992156485   |
| H298 | 7.079944923   | -7.915581285 | 2.620526734   |
| H299 | 3.615069841   | 1.352984307  | -6.880835680  |
| H300 | 5.148856114   | -0.144827543 | 3.239280235   |
| H301 | 0.545206189   | 1.561509579  | -8.708838394  |
| H302 | -1.169874553  | -2.178004386 | -4.359243769  |
| H303 | 0.429427713   | 2.094862129  | -7.026122430  |
| H304 | 4.266242922   | -4.539911291 | 4.478334523   |

|       |              |               |              |
|-------|--------------|---------------|--------------|
| H305  | 2.064340485  | 0.069399358   | -6.584295844 |
| H306  | 3.948489727  | -5.151250407  | 2.850429775  |
| H307  | 4.798590786  | -7.343082038  | 3.322067260  |
| H308  | 6.450718193  | -5.519472241  | 2.569486245  |
| H309  | 6.671201229  | -5.090562347  | 4.273681645  |
| H310  | -5.195876438 | -0.790230493  | -6.454107633 |
| H311  | 5.949871562  | -9.508821416  | 4.885061004  |
| H312  | 4.977750806  | -11.792222479 | 3.079754013  |
| H313  | 0.189948163  | -0.097473900  | -4.126679109 |
| H314  | 6.264353096  | -11.888946499 | 5.696262093  |
| H315  | 4.700535641  | -12.159153957 | 5.291544960  |
| H316  | 5.518683855  | -3.392557782  | 2.008400411  |
| H317  | -0.710896507 | 2.062084259   | -4.875697066 |
| H318  | -3.394013748 | -2.082663034  | -5.466022967 |
| H319  | 7.669893639  | -9.927669234  | -1.678065599 |
| H320  | 6.640127891  | -7.636963602  | -3.737336975 |
| H321  | 6.645081604  | -8.156383176  | -0.124433535 |
| H322  | 6.801510831  | -10.526620268 | -2.817934311 |
| H323  | 4.888561651  | 2.585192674   | -9.578484882 |
| H324  | 6.359174235  | -5.009918498  | -0.214637721 |
| H325  | 2.316769249  | -7.676606013  | 0.827369096  |
| H326  | 3.275974333  | -1.993144510  | -7.670037371 |
| H327  | 3.078669241  | -9.150430255  | -0.818423205 |
| H328  | 3.121164029  | -7.036946753  | -7.049934359 |
| H329  | 2.257514083  | -5.542869658  | -5.196067219 |
| H330  | 6.574447843  | -12.452283814 | 3.450195170  |
| H331  | 5.737061662  | -1.115766252  | 1.909682391  |
| H332  | 8.349512699  | -5.802630944  | 0.813752480  |
| H333  | 7.258076798  | -3.755826402  | -0.073078353 |
| H334  | 8.978484715  | -6.867502243  | 2.792705267  |
| H335  | 3.650675166  | -2.743826969  | 5.083598153  |
| H336  | 3.799593476  | -8.271266119  | -3.662927400 |
| H337  | 5.002667456  | -8.572538718  | -2.404684086 |
| H338  | 1.939601581  | -8.653447838  | -2.080344840 |
| H339  | 1.344581850  | -2.122501727  | -6.178384759 |
| H340  | -2.958744265 | 2.178044480   | -5.999461867 |
| H341  | -5.112919941 | 0.985644090   | -6.599892361 |
| H342  | 2.347962828  | -5.915126480  | 0.597135531  |
| H343  | 8.512397382  | -7.333444796  | 0.580394683  |
| H344  | 7.399804898  | -9.253100446  | 0.661951037  |
| H345  | 4.127999629  | -1.092239490  | 5.046331141  |
| H346  | 5.582892975  | -7.677932633  | -6.707794478 |
| H347  | 6.565928795  | -5.973563866  | -3.178708144 |
| H348  | 0.456891312  | -2.929471557  | -7.503664767 |
| H349  | 4.283096346  | 4.137511947   | -7.006840908 |
| H350  | 7.791050694  | 0.158083388   | 3.929594817  |
| H351  | 7.815762723  | 0.569919157   | 2.199211724  |
| H352  | 9.017072637  | -6.904430366  | -6.444324137 |
| H353  | 8.257269061  | -8.133748916  | -5.676359835 |
| H354  | 10.312682412 | -8.557305608  | -1.657038438 |
| H355  | 8.599236494  | -8.267867857  | -3.128753008 |
| H356  | 11.724387122 | -7.564929781  | -3.812692458 |
| H357  | 10.173326095 | -6.832585784  | -1.264494071 |
| H358  | 10.561007620 | 0.353189642   | 2.159165518  |
| H359  | -2.972576619 | 13.210165568  | 3.713918148  |
| H360  | 10.247657506 | -6.873847538  | 5.520838597  |
| H361  | 9.513655599  | -4.461431058  | 4.404572804  |
| H362  | -4.700108258 | 12.313952138  | 1.400633378  |
| H363  | -4.087177051 | 10.303594027  | 3.654399579  |
| H364  | -5.676299266 | 11.001433853  | 3.291730806  |
| H365  | 1.157642116  | -3.203845474  | -1.322981563 |
| H366  | 3.492129047  | -0.414786300  | 0.809992769  |
| H367  | -6.435020150 | 6.814682221   | -1.569853452 |
| H368  | 0.846726090  | -1.156592753  | 0.907622262  |
| H369  | -1.774342517 | -0.189184058  | -0.817820766 |
| Mo370 | 3.837939754  | -4.369352734  | -2.494697919 |
| N371  | -6.931772420 | -7.161810157  | -0.303637173 |
| N372  | -8.799374580 | -4.651656707  | 1.751426836  |
| N373  | -8.214976961 | -4.963899224  | 4.485565417  |
| N374  | -5.537088944 | -5.821290653  | 4.508143918  |
| N375  | -4.273702700 | -3.415219945  | 3.691933074  |
| N376  | -4.930859654 | -1.804679208  | 5.976349752  |
| N377  | -3.685564522 | -3.182030782  | 8.180093350  |
| N378  | -1.089575749 | -4.380892461  | 7.533588307  |
| N379  | 0.242296026  | -2.452789751  | 6.158543987  |
| N380  | -0.386378256 | 0.450140959   | 6.787293535  |
| N381  | -0.695746212 | 0.206898603   | 9.657955882  |
| N382  | 5.500189025  | -11.552029193 | 5.106442652  |
| N383  | 6.411427885  | -9.296689805  | 3.994235667  |
| N384  | 5.026799911  | -3.361495811  | 2.906176544  |

|      |              |               |               |
|------|--------------|---------------|---------------|
| N385 | 4.279358786  | -2.032509241  | 4.691116810   |
| N386 | 5.314454152  | -1.067908296  | 2.848988159   |
| N387 | 9.058522496  | -6.984716974  | 3.827005355   |
| N388 | -5.852931945 | -2.939046411  | -2.930173806  |
| N389 | -1.935597942 | -5.580742630  | -3.210735823  |
| N390 | -6.069177675 | -0.435423428  | -2.195017286  |
| N391 | -8.336381578 | 0.679939488   | -0.984216413  |
| N392 | -7.840225813 | 0.353071105   | 1.760127021   |
| N393 | -5.693429154 | 2.086833665   | 2.256682880   |
| N394 | -3.085255552 | 2.650042823   | -1.104050259  |
| N395 | -2.334260963 | 0.668215125   | -0.694583280  |
| N396 | -6.313496088 | 4.722759235   | 2.876995585   |
| N397 | -9.720499196 | 7.745933219   | 1.598939753   |
| N398 | -9.636415563 | 9.526110213   | 2.920696487   |
| N399 | 9.481640654  | 2.691249218   | 2.393257758   |
| N400 | 6.295242718  | 7.182092443   | -0.327096572  |
| N401 | 4.213274475  | 8.469178528   | -2.901030760  |
| N402 | 1.552184553  | 7.845543002   | -3.368998771  |
| N403 | -3.173315153 | 6.395571055   | -4.458082886  |
| N404 | -3.390993935 | 8.222070858   | -5.905935584  |
| N405 | -4.449521237 | 8.235247352   | -3.843890100  |
| N406 | 0.665478336  | 6.323450711   | -1.093060406  |
| N407 | 0.971128480  | 8.204018877   | 0.968338852   |
| N408 | -0.363633553 | 10.602447172  | 0.660544076   |
| N409 | -1.883590648 | 10.374311807  | -3.057848598  |
| N410 | -2.742133819 | 11.614800016  | 1.708827927   |
| N411 | 4.079651112  | -4.791532696  | -10.235312990 |
| N412 | 2.458462928  | -2.563502271  | -7.900212668  |
| N413 | 1.388590050  | 0.246186300   | -7.345452193  |
| N414 | 3.478556679  | 2.217003285   | -7.413250866  |
| N415 | -1.705257853 | -3.010982315  | -10.095129277 |
| N416 | -3.263450304 | -1.173171194  | -8.522161093  |
| N417 | 8.141707626  | -7.161577031  | -5.979394199  |
| N418 | 4.263162204  | -5.692701817  | -4.407705996  |
| N419 | 3.700077514  | -6.697859817  | -6.286440117  |
| N420 | 9.249735275  | -7.478639997  | -3.072930009  |
| N421 | 0.133227907  | 2.199539932   | 0.021455328   |
| N422 | 2.513442558  | -0.481917196  | 0.479953803   |
| N423 | 0.910139567  | 1.517919248   | -0.420657494  |
| N424 | 1.800587393  | -1.065409715  | 1.325809931   |
| O425 | -6.565711206 | -5.087799678  | 1.673292927   |
| O426 | -7.346302277 | -2.854745432  | 4.522772967   |
| O427 | -5.398657697 | -5.248718677  | 6.714972881   |
| O428 | -2.512907574 | -4.056931977  | 4.984391089   |
| O429 | -3.067623888 | -0.595183923  | 5.513464844   |
| O430 | -3.278812418 | -1.104840779  | 9.050740162   |
| O431 | -0.553685349 | -4.114953288  | 9.747971042   |
| O432 | 2.175667017  | -3.699008389  | 6.013440266   |
| O433 | 1.895491990  | 0.378367023   | 6.632066880   |
| O434 | 0.809679804  | 1.904206075   | 9.749665905   |
| O435 | 1.516389746  | -0.337661151  | 12.432228296  |
| O436 | 7.047496820  | -10.339999453 | 2.031137072   |
| O437 | 8.062786209  | -7.733315991  | 5.760469738   |
| O438 | 11.546992081 | -4.499142085  | 4.554006874   |
| O439 | -5.622116877 | -0.830209680  | 0.019639204   |
| O440 | -3.717322702 | -4.424678556  | -4.022752185  |
| O441 | -7.098944728 | 2.516744782   | -0.428087311  |
| O442 | -6.324707086 | 3.051821917   | -3.375366623  |
| O443 | -9.757336191 | 1.512455922   | 2.259523879   |
| O444 | -5.594766991 | 1.422230970   | 4.441748614   |
| O445 | -4.224483152 | 5.042221865   | 3.743688886   |
| O446 | -6.517561534 | 7.268638720   | 5.332712677   |
| O447 | 10.810256968 | -0.051401310  | 4.145172676   |
| O448 | 3.600436546  | 4.727112103   | 3.924589127   |
| O449 | 3.624877753  | 8.388513099   | -0.699969545  |
| O450 | 0.982379927  | 10.068459522  | -3.549905567  |
| O451 | -1.402282941 | 7.186906865   | -1.544344119  |
| O452 | -0.689916120 | 7.137850936   | 2.140234460   |
| O453 | 2.454832521  | 5.678497049   | 1.403002147   |
| O454 | 0.853233289  | 11.581591455  | 2.336778454   |
| O455 | -2.491542841 | 13.586460953  | 0.591748848   |
| O456 | -3.250126402 | 11.030768822  | -1.347042812  |
| O457 | -4.949440223 | 13.709872373  | 3.615770901   |
| O458 | -5.491070591 | 6.837563513   | -1.319451294  |
| O459 | 1.744884872  | -4.577585276  | -8.740854969  |
| O460 | -0.248202900 | -0.745621779  | -8.608625572  |
| O461 | 2.103232930  | 3.620935048   | -8.554616508  |
| O462 | 5.725395238  | 4.404032972   | -9.179969750  |
| O463 | -4.983800346 | -2.623898282  | -8.884484510  |
| O464 | -1.483730472 | -6.631991138  | -6.024608864  |

|      |              |               |              |
|------|--------------|---------------|--------------|
| O465 | 0.434802751  | -5.760891740  | -6.758001296 |
| O466 | -3.959932271 | 2.329299132   | -8.458803236 |
| O467 | 9.924106138  | -5.407448035  | -3.699250196 |
| O468 | 12.670720644 | -6.990590282  | -2.097591323 |
| O469 | 0.312083499  | -6.208850162  | -1.346455847 |
| O470 | -0.227622587 | -7.291098903  | 0.548031426  |
| O471 | 5.161088240  | -10.881689763 | -3.316236634 |
| O472 | 2.900162193  | -10.921939129 | -3.284228301 |
| O473 | 5.088101825  | -5.768026551  | -1.376715010 |
| O474 | 5.049470257  | -7.435199995  | 0.125154150  |
| O475 | 2.614110268  | -6.075080689  | -2.125584985 |
| O476 | 8.946709607  | -6.558376604  | 1.034183758  |
| O477 | 6.964755915  | -4.546263583  | 0.418692053  |
| O478 | -4.375936315 | 4.741274628   | -2.450357380 |
| O479 | 7.755894748  | -10.416651125 | -2.526645618 |
| O480 | 7.516462479  | -8.631897021  | -0.101756814 |
| S481 | 3.577099106  | 5.013903075   | -2.526989699 |
| S482 | 1.897009587  | 1.755483749   | -3.222009581 |
| S483 | 2.078781826  | -3.350790193  | -3.734420484 |
| S484 | 3.813893794  | 1.934461842   | -0.254559756 |
| S485 | 0.454511953  | -1.070140461  | -1.616229677 |
| S486 | 4.031811001  | -0.691356012  | -5.587215438 |
| S487 | 3.418738547  | -3.423975275  | -0.344498471 |
| S488 | 5.629205281  | 1.718700298   | -3.255960625 |
| S489 | 5.688023503  | -3.082186669  | -3.221131548 |
| S490 | 6.280932553  | -0.886992320  | -0.344622033 |
| end  |              |               |              |

## N2-ready-b to Fe2-NH-N-b

Figure 8, scheme B

| reactant <b>N2-ready-b</b> (S=3/2) | <b>bm52capexp347tf.car_6</b> |              |               |              |
|------------------------------------|------------------------------|--------------|---------------|--------------|
| Fe( 139) 2.323                     | C1                           | -7.734132254 | -5.365012870  | 1.276604324  |
| Fe( 140) 0.829                     | C2                           | -8.135095861 | -6.509447875  | 0.337697222  |
| Fe( 141) 1.454                     | C3                           | -8.542266679 | -3.434833417  | 2.564909518  |
| Fe( 142) -2.433                    | C4                           | -7.904586471 | -3.695017532  | 3.925772290  |
| Fe( 143) 2.902                     | C5                           | -7.472554345 | -5.284144170  | 5.734509489  |
| Fe( 144) -0.986                    | C6                           | -5.947916775 | -5.405031596  | 5.666779587  |
| Fe( 145) -1.531                    | C7                           | -3.974526188 | -5.711226394  | 4.272326340  |
|                                    | C8                           | -3.463373429 | -4.269210762  | 4.307144548  |
|                                    | C9                           | -3.885620162 | -1.950437432  | 3.606634116  |
|                                    | C10                          | -3.901796370 | -1.318888201  | 5.007921171  |
|                                    | C11                          | -4.919983835 | -1.157099533  | 7.188735644  |
|                                    | C12                          | -3.858294284 | -1.708688511  | 8.151596358  |
|                                    | C13                          | -2.853486602 | -3.724262863  | 9.129149260  |
|                                    | C14                          | -1.385905188 | -4.041750987  | 8.806375371  |
|                                    | C15                          | 0.241012621  | -4.801885830  | 7.120788103  |
|                                    | C16                          | 0.982416258  | -3.653212613  | 6.426467315  |
|                                    | C17                          | 0.644416790  | -1.415925815  | 5.389442684  |
|                                    | C18                          | 0.775525275  | -0.201278523  | 6.324885437  |
|                                    | C19                          | -0.264658075 | -1.208764723  | 4.160292876  |
|                                    | C20                          | -0.036905604 | 0.146219692   | 3.472912911  |
|                                    | C21                          | -0.136328042 | -2.410321624  | 3.213774049  |
|                                    | C22                          | -0.357769944 | 1.551163263   | 7.617731148  |
|                                    | C23                          | 0.008562942  | 1.227270525   | 9.077618505  |
|                                    | C24                          | -1.686391070 | 2.332687168   | 7.481501753  |
|                                    | C25                          | -1.751986824 | 3.500047822   | 8.471891701  |
|                                    | C26                          | -1.865845570 | 2.842350687   | 6.044621656  |
|                                    | C27                          | -0.404814848 | -0.087708881  | 11.070366157 |
|                                    | C28                          | 1.060151879  | -0.355847498  | 11.351400638 |
|                                    | C29                          | 5.897438758  | -11.599477165 | 3.752826448  |
|                                    | C30                          | 6.515109272  | -10.322149756 | 3.194306265  |
|                                    | C31                          | 6.786739860  | -7.895604748  | 3.681069787  |
|                                    | C32                          | 8.007947931  | -7.501893869  | 4.531792055  |
|                                    | C33                          | 5.607863757  | -6.938593258  | 3.920726303  |
|                                    | C34                          | 5.942207087  | -5.497114713  | 3.547990804  |
|                                    | C35                          | 4.698287110  | -4.614084078  | 3.497846122  |
|                                    | C36                          | 4.896158159  | -2.113339938  | 3.511592423  |
|                                    | C37                          | 10.268917503 | -6.559342420  | 4.484984470  |
|                                    | C38                          | 10.493878240 | -5.064815543  | 4.471899230  |
|                                    | C39                          | -5.329820364 | -2.675253566  | -1.562613377 |
|                                    | C40                          | -5.692860319 | -1.241572292  | -1.128322278 |
|                                    | C41                          | -3.791583510 | -2.821571234  | -1.504547471 |
|                                    | C42                          | -3.244071881 | -4.259171157  | -1.621370396 |
|                                    | C43                          | -2.976988784 | -4.746658587  | -3.046282312 |
|                                    | C44                          | -6.183862568 | 0.997988729   | -2.033538777 |
|                                    | C45                          | -7.273827425 | 1.452982777   | -1.052564252 |



|      |               |              |              |
|------|---------------|--------------|--------------|
| C46  | -6.361075868  | 1.606883985  | -3.430021444 |
| C47  | -9.427898140  | 0.930348014  | -0.006368156 |
| C48  | -9.030699668  | 0.950428247  | 1.472806420  |
| C49  | -7.325362296  | 0.439000544  | 3.155712533  |
| C50  | -6.155049882  | 1.401097318  | 3.366966910  |
| C51  | -4.605098204  | 3.045594005  | 2.433939223  |
| C52  | -5.046854949  | 4.354197080  | 3.130952169  |
| C53  | -4.020209484  | 3.480098665  | 1.081377156  |
| C54  | -3.402965453  | 2.417824599  | 0.234845671  |
| C55  | -2.981172767  | 1.133960065  | 0.469933970  |
| C56  | -2.547690903  | 1.605324815  | -1.665338245 |
| C57  | -6.849273214  | 6.033666756  | 3.239678770  |
| C58  | -6.755909664  | 6.189682711  | 4.756428035  |
| C59  | -8.322537089  | 6.088922064  | 2.772004571  |
| C60  | -8.945267436  | 7.449626443  | 2.657513575  |
| C61  | -8.871846814  | 8.553007491  | 3.485323793  |
| C62  | -10.198693907 | 8.969697737  | 1.760179309  |
| C63  | 9.237686775   | 1.628910296  | 3.433849452  |
| C64  | 10.269303793  | 0.527581377  | 3.265961846  |
| C65  | 7.845389819   | 0.982658597  | 3.250750780  |
| C66  | 6.709668151   | 1.956636238  | 3.461767442  |
| C67  | 6.139784088   | 2.155645915  | 4.731869500  |
| C68  | 6.191397600   | 2.699411147  | 2.385384554  |
| C69  | 5.087851758   | 3.059368520  | 4.924798834  |
| C70  | 5.156803308   | 3.617619937  | 2.564950327  |
| C71  | 4.598311884   | 3.789521948  | 3.834032190  |
| C72  | 5.383191279   | 6.858685926  | -1.385085721 |
| C73  | 4.324989542   | 7.959208293  | -1.597045966 |
| C74  | 4.698852697   | 5.531125550  | -1.098262093 |
| C75  | 3.314160314   | 9.544044228  | -3.201954322 |
| C76  | 1.839594791   | 9.161968384  | -3.365236751 |
| C77  | 0.216065770   | 7.270657545  | -3.328513642 |
| C78  | -0.253169829  | 6.927332490  | -1.890722879 |
| C79  | 0.245003373   | 6.024673038  | -4.242902343 |
| C80  | -1.008079362  | 5.147104815  | -4.349479383 |
| C81  | -2.152316458  | 5.682633518  | -5.226592316 |
| C82  | -3.673260666  | 7.602827886  | -4.743899390 |
| C83  | 0.268942385   | 5.982485670  | 0.306372589  |
| C84  | 0.115119622   | 7.202671269  | 1.225957410  |
| C85  | 1.265350621   | 5.013469963  | 0.975877320  |
| C86  | 1.199353237   | 9.267336187  | 1.966153954  |
| C87  | 0.555887218   | 10.610767544 | 1.657731085  |
| C88  | -0.855685449  | 11.875464793 | 0.127184267  |
| C89  | -2.130072045  | 12.430592283 | 0.810150004  |
| C90  | -1.016197506  | 11.883580059 | -1.395343550 |
| C91  | -2.159569859  | 11.012427401 | -1.899336108 |
| C92  | -4.073956176  | 11.948219387 | 2.222095369  |
| C93  | -3.987108932  | 13.049918640 | 3.270989674  |
| C94  | -4.731361174  | 10.680565451 | 2.835046187  |
| C95  | -4.972190027  | 9.607000122  | 1.798443365  |
| C96  | -6.154531881  | 9.602678048  | 1.042679860  |
| C97  | -4.006061335  | 8.626393081  | 1.520663033  |
| C98  | -6.360069336  | 8.666298447  | 0.028020718  |
| C99  | -4.182222166  | 7.697152038  | 0.490687385  |
| C100 | -5.359638504  | 7.734431240  | -0.250435150 |
| C101 | 4.086761212   | -3.979197898 | -8.998739705 |
| C102 | 2.660105600   | -3.726271740 | -8.544102819 |
| C103 | 1.204285542   | -2.191311682 | -7.242924338 |
| C104 | 0.707097328   | -0.834022967 | -7.754558396 |
| C105 | 1.122611543   | 1.587715882  | -7.711900278 |
| C106 | 2.296165926   | 2.542446861  | -7.913440391 |
| C107 | 4.575760538   | 3.213399525  | -7.404814295 |
| C108 | 5.169628498   | 3.373799853  | -8.789356960 |
| C109 | -2.761123087  | -3.492841836 | -9.150223984 |
| C110 | -3.787153112  | -2.402996715 | -8.816533210 |
| C111 | -2.270604897  | -4.170100407 | -7.849189053 |
| C112 | -1.538112897  | -5.490303357 | -8.150473374 |
| C113 | -0.860099292  | -6.019182701 | -6.906957997 |
| C114 | -4.191700907  | -0.084983649 | -8.157008905 |
| C115 | -3.713913388  | 1.199562033  | -8.804585987 |
| C116 | -4.569408299  | 0.045820740  | -6.660166883 |
| C117 | -3.334177572  | 0.058411715  | -5.805593412 |
| C118 | -2.607642526  | 1.245799583  | -5.610187954 |
| C119 | -2.798045732  | -1.153073672 | -5.339158204 |
| C120 | -1.328521151  | 1.199621888  | -5.046967464 |
| C121 | -1.520808387  | -1.197900945 | -4.774076507 |
| C122 | -0.769255634  | -0.024008926 | -4.667636959 |
| C123 | 7.914975220   | -6.235921298 | -4.770929301 |
| C124 | 9.096912089   | -6.322801127 | -3.794110912 |
| C125 | 6.602924794   | -6.605129414 | -4.066380631 |

|       |              |               |              |
|-------|--------------|---------------|--------------|
| C126  | 5.351455459  | -6.397397417  | -4.853830250 |
| C127  | 4.996199944  | -6.986501931  | -6.050137220 |
| C128  | 3.261911801  | -5.876922584  | -5.238666527 |
| C129  | 10.307927783 | -7.550477505  | -2.093392706 |
| C130  | 11.658760312 | -7.321966256  | -2.734924833 |
| C131  | 0.601453562  | -6.925198813  | -0.196784370 |
| C132  | 2.092256707  | -6.968840807  | 0.121029270  |
| C133  | 3.011757127  | -7.093483184  | -1.132748949 |
| C134  | 2.921335994  | -8.534682529  | -1.700373720 |
| C135  | 3.954494311  | -8.875327210  | -2.776732727 |
| C136  | 3.978834253  | -10.365132834 | -3.179894983 |
| C137  | 4.467741997  | -6.827072245  | -0.710496413 |
| C138  | 3.588716262  | -0.695288962  | -2.229729898 |
| Fe139 | 3.876336923  | -2.025436924  | -3.720688680 |
| Fe140 | 2.222662579  | 0.818331092   | -1.518946186 |
| Fe141 | 5.015746138  | 0.430307490   | -1.635596709 |
| Fe142 | 3.798116639  | 0.516151440   | -3.838420559 |
| Fe143 | 3.791597206  | 2.786236903   | -2.488509547 |
| Fe144 | 4.680500200  | -2.055097214  | -1.277713957 |
| Fe145 | 2.163085956  | -2.417726232  | -1.752547046 |
| H146  | -6.370108375 | -7.533002531  | 0.332357210  |
| H147  | -6.548548847 | -6.539547393  | -0.950254677 |
| H148  | -9.705256833 | -4.783381044  | 1.389267487  |
| H149  | -8.851849077 | -6.119634962  | -0.403014371 |
| H150  | -8.695405760 | -7.239201765  | 0.947302023  |
| H151  | -7.881923365 | -2.727636826  | 2.041847003  |
| H152  | -8.655826823 | -5.599457795  | 3.964906408  |
| H153  | -9.506458834 | -2.935170931  | 2.727607164  |
| H154  | -7.891098246 | -6.243308434  | 6.065691684  |
| H155  | -6.014987045 | -5.841236180  | 3.651954463  |
| H156  | -7.691449498 | -4.531291041  | 6.502798451  |
| H157  | -2.889721536 | -1.761117121  | 3.185100487  |
| H158  | -4.977665544 | -3.701489760  | 3.034493242  |
| H159  | -3.732824791 | -6.171849720  | 3.305123593  |
| H160  | -4.768889694 | -0.071044817  | 7.136447001  |
| H161  | -5.653834117 | -2.290225737  | 5.503390768  |
| H162  | -3.452931733 | -6.263996653  | 5.062238776  |
| H163  | -4.624725731 | -1.445961449  | 2.968197441  |
| H164  | -4.207383828 | -3.622517121  | 7.474281657  |
| H165  | -5.911867954 | -1.354459356  | 7.619088368  |
| H166  | -0.522110707 | -3.325640622  | 3.681474709  |
| H167  | -0.699470669 | -2.247238147  | 2.281522634  |
| H168  | 0.909218729  | -2.589797995  | 2.927849769  |
| H169  | -1.292923914 | -1.189789340  | 4.542104244  |
| H170  | -3.352018340 | -4.672259716  | 9.380852146  |
| H171  | -1.870748782 | 2.025428246   | 5.311075858  |
| H172  | -1.449541786 | -0.255165337  | 9.215969032  |
| H173  | -1.706970700 | 3.166176932   | 9.518264033  |
| H174  | 0.757817255  | 0.110285263   | 2.728176054  |
| H175  | 0.224455283  | 0.942382578   | 4.184321632  |
| H176  | 9.311671102  | 1.987601663   | 4.478578296  |
| H177  | -2.821048703 | 3.378057612   | 5.946362357  |
| H178  | -2.693760729 | 4.050239947   | 8.330755294  |
| H179  | -1.055180928 | 3.542575121   | 5.783228559  |
| H180  | -0.919389346 | 4.201465116   | 8.303423709  |
| H181  | -2.510642858 | 1.633416672   | 7.712312273  |
| H182  | 0.469708383  | 2.186661609   | 7.267026039  |
| H183  | -1.279100378 | 0.037068529   | 6.403079767  |
| H184  | -0.957201232 | 0.466111569   | 2.960423220  |
| H185  | 1.557794621  | 4.248956254   | 0.242217907  |
| H186  | 0.730054169  | 4.519308174   | 1.799920918  |
| H187  | 2.665700649  | 5.321491900   | 2.329383862  |
| H188  | 3.214132007  | 4.680580239   | 4.864476315  |
| H189  | 4.759762351  | 4.177736904   | 1.718232975  |
| H190  | 6.589183005  | 2.540220866   | 1.380413537  |
| H191  | 6.514606125  | 1.588784688   | 5.588798281  |
| H192  | -0.789782738 | -2.680707952  | 6.314305877  |
| H193  | 0.220010076  | -5.650388128  | 6.421877116  |
| H194  | 0.833322036  | -5.100194341  | 7.994946250  |
| H195  | -1.855537935 | -4.538997676  | 6.840400642  |
| H196  | -2.836696628 | -3.093945609  | 10.026206782 |
| H197  | 4.645178428  | 3.188928772   | 5.916405760  |
| H198  | 1.670165437  | -1.623686683  | 5.061824106  |
| H199  | -0.750692759 | 0.717122935   | 11.739474441 |
| H200  | -0.957585835 | -1.003529806  | 11.330958664 |
| H201  | 1.649398263  | -0.728841654  | 10.481865329 |
| H202  | 11.143243622 | -7.060119971  | 4.042069202  |
| H203  | -1.753528603 | -5.984933742  | -4.123916350 |
| H204  | 1.241612940  | -6.065216176  | -1.805170829 |
| H205  | -2.268888078 | -6.240824620  | -8.485128197 |

|      |               |              |               |
|------|---------------|--------------|---------------|
| H206 | -0.802366869  | -5.342199866 | -8.953983117  |
| H207 | -3.121986586  | -4.377215219 | -7.182292988  |
| H208 | -3.109453652  | 1.047398843  | -9.729863709  |
| H209 | -3.348899848  | -4.237815876 | -9.708160442  |
| H210 | -3.349752386  | -2.193930269 | -2.297161902  |
| H211 | -3.950740254  | -4.971949038 | -1.162695010  |
| H212 | -2.279314031  | -1.026650431 | -8.428005352  |
| H213 | -5.130657996  | -0.319821620 | -8.700603991  |
| H214 | -1.039895919  | -2.403270159 | -9.564228203  |
| H215 | -1.318593246  | -5.851022320 | -2.423405933  |
| H216 | -1.613527402  | -3.471314121 | -7.307931804  |
| H217 | -1.210037610  | -3.770401836 | -10.466589027 |
| H218 | -6.739894408  | -3.458688420 | -2.853214958  |
| H219 | -3.464825512  | -2.414975519 | -0.535702085  |
| H220 | 0.831553624   | -5.290990469 | -7.589031153  |
| H221 | -2.317467562  | -4.340271980 | -1.034974613  |
| H222 | -3.831702692  | 2.605613479  | 3.079375548   |
| H223 | -3.016645194  | 0.523686127  | 1.363177043   |
| H224 | -8.139921298  | 0.779831264  | 3.809460270   |
| H225 | -7.263967746  | -0.073101237 | 1.083316459   |
| H226 | -6.928999047  | 4.082481369  | 2.361327466   |
| H227 | -8.325181758  | 8.742316894  | 4.401625676   |
| H228 | -6.907725894  | 5.234236485  | 5.315752152   |
| H229 | -8.930493947  | 5.431509353  | 3.419011481   |
| H230 | -6.266302175  | 6.837883970  | 2.763949807   |
| H231 | -10.875071173 | 9.517915148  | 1.110140313   |
| H232 | -3.259298719  | 4.248537108  | 1.292228420   |
| H233 | -4.813396977  | 3.970349090  | 0.494272182   |
| H234 | -9.835270441  | 10.447667040 | 3.250136432   |
| H235 | -8.360260050  | 5.647428421  | 1.763480782   |
| H236 | -6.173381900  | 2.015352485  | 1.375568463   |
| H237 | -7.018005248  | -0.551381003 | 3.523466891   |
| H238 | -9.871673876  | 1.913900871  | -0.215313513  |
| H239 | -2.205334134  | 1.505556436  | -2.693082581  |
| H240 | -10.212089415 | 0.174699341  | -0.143892716  |
| H241 | 10.297668266  | 3.214054909  | 2.687169062   |
| H242 | 8.690116418   | 3.315169691  | 2.412311521   |
| H243 | 1.554286960   | 5.989011630  | -1.430900002  |
| H244 | -0.715914117  | 5.494138574  | 0.278802977   |
| H245 | 1.734947298   | 8.069534251  | 0.308708446   |
| H246 | -3.435522374  | 3.543414277  | -1.608842997  |
| H247 | -5.111367255  | 4.158521897  | -2.786004794  |
| H248 | -6.710586643  | 3.392898280  | -4.162947612  |
| H249 | -4.796453477  | 5.409375029  | -1.851220661  |
| H250 | -5.536263025  | 1.249199120  | -4.068115541  |
| H251 | -7.316820690  | 1.276998339  | -3.865330568  |
| H252 | -0.062242722  | 11.614029697 | -1.869586994  |
| H253 | -1.252059850  | 12.918859364 | -1.687701336  |
| H254 | -0.909492632  | 10.171478018 | -3.320942117  |
| H255 | -2.583622453  | 9.616353530  | -3.289585748  |
| H256 | -3.681398308  | 9.204582112  | -6.027434988  |
| H257 | -2.646946364  | 4.849719047  | -5.749060270  |
| H258 | -7.292595025  | 8.666074689  | -0.542439791  |
| H259 | -3.090645697  | 8.564373455  | 2.114442280   |
| H260 | -4.698004508  | 7.766313906  | -2.963327929  |
| H261 | 1.064917517   | 5.379876350  | -3.888302561  |
| H262 | 2.344307729   | 7.189594368  | -3.219185352  |
| H263 | -1.391803215  | 4.883406231  | -3.351642539  |
| H264 | -8.366340394  | -0.219566338 | -1.477714492  |
| H265 | 3.646377695   | 10.004391032 | -4.142106393  |
| H266 | -6.094306217  | -0.954868216 | -3.059969298  |
| H267 | 0.537359736   | 6.362530829  | -5.250644436  |
| H268 | -3.390256950  | 6.986302654  | 0.251169612   |
| H269 | 3.342261111   | 10.317069733 | -2.420623761  |
| H270 | -2.933921753  | 7.775441767  | -6.662986224  |
| H271 | -5.102223542  | 8.947694174  | -4.163847683  |
| H272 | -5.173343100  | -3.518063469 | -3.435743653  |
| H273 | -5.758370111  | -3.336333666 | -0.786573294  |
| H274 | -6.936005810  | 10.337041360 | 1.251387743   |
| H275 | -5.255620791  | 1.391629602  | -1.595505528  |
| H276 | -0.482917275  | 8.025404482  | -3.701586893  |
| H277 | -1.737135809  | 6.342301992  | -5.998832133  |
| H278 | -0.675736284  | 4.204611370  | -4.806679569  |
| H279 | -3.600672491  | 5.871060536  | -3.677353830  |
| H280 | 0.809983919   | 8.928943446  | 2.938000501   |
| H281 | -0.459002870  | 9.759954457  | 0.098563917   |
| H282 | -0.089037383  | 12.625793359 | 0.375195304   |
| H283 | 2.277748454   | 9.445622383  | 2.071877320   |
| H284 | -2.445580022  | 10.650775954 | 1.729587584   |
| H285 | 4.606680398   | -3.021548275 | -9.146735517  |

|      |              |               |               |
|------|--------------|---------------|---------------|
| H286 | 4.585851689  | -4.482931217  | -8.143519709  |
| H287 | 7.872602586  | -5.180014797  | -5.076947712  |
| H288 | 5.048126918  | -5.085614490  | -10.412756487 |
| H289 | 3.510284555  | -5.573286565  | -10.124122727 |
| H290 | 5.466682107  | 4.758510109   | -0.972449698  |
| H291 | 5.727504982  | 7.442320203   | 0.543829885   |
| H292 | 4.825793295  | 8.083993158   | -3.587093679  |
| H293 | 4.100586947  | 5.605621503   | -0.180107165  |
| H294 | 6.810887275  | 8.052453980   | -0.514488032  |
| H295 | 5.377187343  | 2.863039429   | -6.736798192  |
| H296 | 5.991842430  | 6.757859346   | -2.297302574  |
| H297 | 5.298598175  | -7.007062793  | 4.976891794   |
| H298 | 7.052740462  | -7.881095696  | 2.616267017   |
| H299 | 3.633650208  | 1.400495130   | -6.786983973  |
| H300 | 5.143820759  | -0.098005707  | 3.230958763   |
| H301 | 0.557065026  | 1.554662600   | -8.651250991  |
| H302 | -1.101513111 | -2.148568266  | -4.436344555  |
| H303 | 0.465361376  | 2.062473168   | -6.962229931  |
| H304 | 4.265826111  | -4.489650086  | 4.497467867   |
| H305 | 2.135485067  | 0.030995940   | -6.592214486  |
| H306 | 3.924847844  | -5.077134890  | 2.864546647   |
| H307 | 4.769503908  | -7.298374335  | 3.302816120   |
| H308 | 6.415745554  | -5.477959615  | 2.555429778   |
| H309 | 6.662824359  | -5.062835032  | 4.258597509   |
| H310 | -5.215230408 | -0.805714270  | -6.401759732  |
| H311 | 5.927315185  | -9.454776118  | 4.898063561   |
| H312 | 4.985580267  | -11.777405613 | 3.162572277   |
| H313 | 0.245403483  | -0.043813415  | -4.278279896  |
| H314 | 6.329091831  | -11.788676759 | 5.757480407   |
| H315 | 4.772635628  | -12.139015417 | 5.389669000   |
| H316 | 5.524548205  | -3.340675547  | 2.032226436   |
| H317 | -0.744013772 | 2.111620960   | -4.914334356  |
| H318 | -3.371442831 | -2.076591540  | -5.443574114  |
| H319 | 7.621784007  | -9.938440780  | -1.668589638  |
| H320 | 6.635246842  | -7.669604437  | -3.777159087  |
| H321 | 6.624244566  | -8.179361146  | -0.104758487  |
| H322 | 6.758480361  | -10.542051865 | -2.814292982  |
| H323 | 4.943639785  | 2.542115983   | -9.498915908  |
| H324 | 6.348989282  | -5.057615138  | -0.215980777  |
| H325 | 2.287436627  | -7.785554471  | 0.827066854   |
| H326 | 3.278926083  | -2.017328339  | -7.601961058  |
| H327 | 3.050186771  | -9.221602845  | -0.848908073  |
| H328 | 3.096182403  | -6.959834528  | -7.039057022  |
| H329 | 2.249153395  | -5.506964303  | -5.152078602  |
| H330 | 6.594069624  | -12.421313622 | 3.514627777   |
| H331 | 5.758680909  | -1.074605790  | 1.941219304   |
| H332 | 8.363166932  | -5.802190927  | 0.795428289   |
| H333 | 7.232893061  | -3.786590479  | -0.137129341  |
| H334 | 8.973531686  | -6.855134431  | 2.797414549   |
| H335 | 3.720909254  | -2.709304602  | 5.136336750   |
| H336 | 3.743326718  | -8.289952589  | -3.684698873  |
| H337 | 4.962914332  | -8.595202325  | -2.443197749  |
| H338 | 1.903983843  | -8.691139350  | -2.091152235  |
| H339 | 1.338901958  | -2.161597345  | -6.149639759  |
| H340 | -3.029839962 | 2.194354144   | -5.950409586  |
| H341 | -5.153566498 | 0.972071593   | -6.553237238  |
| H342 | 2.316247830  | -6.020909685  | 0.638736291   |
| H343 | 8.506577654  | -7.336867313  | 0.582794386   |
| H344 | 7.407974161  | -9.256135795  | 0.675790487   |
| H345 | 4.162381478  | -1.041300632  | 5.094770150   |
| H346 | 5.558463666  | -7.618846792  | -6.725341032  |
| H347 | 6.528781458  | -6.041641905  | -3.128664946  |
| H348 | 0.455777948  | -2.945663683  | -7.493250506  |
| H349 | 4.246961837  | 4.197962915   | -7.039038262  |
| H350 | 7.765972327  | 0.149657560   | 3.964733300   |
| H351 | 7.796880051  | 0.560790035   | 2.234571051   |
| H352 | 8.997031086  | -6.735475216  | -6.440168339  |
| H353 | 8.269579905  | -8.023173935  | -5.738227267  |
| H354 | 10.307162062 | -8.571821122  | -1.681864683  |
| H355 | 8.553900023  | -8.229784704  | -3.098717352  |
| H356 | 11.699367400 | -7.550391624  | -3.827329248  |
| H357 | 10.174344362 | -6.855544761  | -1.248956272  |
| H358 | 10.544482350 | 0.316109125   | 2.204310828   |
| H359 | -2.978342818 | 13.194087223  | 3.724567171   |
| H360 | 10.202836583 | -6.867650261  | 5.543407671   |
| H361 | 9.568131932  | -4.444765306  | 4.391763229   |
| H362 | -4.711585076 | 12.321055776  | 1.403147783   |
| H363 | -4.090203920 | 10.301018781  | 3.646063706   |
| H364 | -5.681885547 | 10.995245646  | 3.289595401   |
| H365 | 1.089117796  | -3.227609340  | -1.028340495  |

|       |              |               |               |
|-------|--------------|---------------|---------------|
| H366  | 4.387534249  | -1.536404524  | 0.084026807   |
| H367  | -6.454854748 | 6.805725569   | -1.567471775  |
| H368  | 0.102261590  | -0.953739253  | -0.540547641  |
| H369  | -2.015541639 | -0.243430412  | -0.871194992  |
| M0370 | 3.846050045  | -4.400884148  | -2.432238646  |
| N371  | -7.054218978 | -7.193255413  | -0.347932514  |
| N372  | -8.772224574 | -4.624006281  | 1.761575979   |
| N373  | -8.095701126 | -4.918745939  | 4.472336017   |
| N374  | -5.415403380 | -5.778984388  | 4.476228729   |
| N375  | -4.188244191 | -3.373564404  | 3.588092552   |
| N376  | -4.871530606 | -1.732211895  | 5.855825230   |
| N377  | -3.639170540 | -3.049373031  | 8.103863834   |
| N378  | -1.115268895 | -4.492026826  | 7.546607833   |
| N379  | 0.208514187  | -2.583222454  | 6.139111841   |
| N380  | -0.381875465 | 0.349373004   | 6.782077290   |
| N381  | -0.656672954 | 0.204050925   | 9.671608608   |
| N382  | 5.539704892  | -11.500122054 | 5.174690278   |
| N383  | 6.381948599  | -9.252583175  | 4.001537629   |
| N384  | 5.031998225  | -3.307060063  | 2.928599388   |
| N385  | 4.285817810  | -1.971768243  | 4.705386538   |
| N386  | 5.399195869  | -1.024271447  | 2.900951614   |
| N387  | 9.039172569  | -6.963910531  | 3.833712367   |
| N388  | -5.857003525 | -2.946773208  | -2.905007139  |
| N389  | -1.949359287 | -5.601824964  | -3.192728822  |
| N390  | -6.079502700 | -0.445260600  | -2.160178152  |
| N391  | -8.353314229 | 0.645822489   | -0.942277184  |
| N392  | -7.852796299 | 0.351802777   | 1.807072137   |
| N393  | -5.689714132 | 2.084548800   | 2.275530082   |
| N394  | -3.121677650 | 2.676442549   | -1.101012607  |
| N395  | -2.466992114 | 0.659580812   | -0.721734110  |
| N396  | -6.322346292 | 4.729796971   | 2.858562762   |
| N397  | -9.777330318 | 7.722816590   | 1.583508071   |
| N398  | -9.672109558 | 9.508690742   | 2.896187394   |
| N399  | 9.477882016  | 2.661732993   | 2.423738834   |
| N400  | 6.291980162  | 7.201264414   | -0.277545890  |
| N401  | 4.227239631  | 8.467730041   | -2.860469684  |
| N402  | 1.560152911  | 7.842281066   | -3.341318767  |
| N403  | -3.173073746 | 6.401324748   | -4.457768963  |
| N404  | -3.357569929 | 8.254615768   | -5.876998728  |
| N405  | -4.453431930 | 8.236148036   | -3.838501262  |
| N406  | 0.652380264  | 6.332443994   | -1.063115957  |
| N407  | 0.974790522  | 8.230593838   | 0.976082309   |
| N408  | -0.367842260 | 10.613262752  | 0.649017686   |
| N409  | -1.886831895 | 10.313956420  | -3.035602393  |
| N410  | -2.752542917 | 11.619725840  | 1.702152828   |
| N411  | 4.098842799  | -4.744286760  | -10.246303752 |
| N412  | 2.462211261  | -2.574306874  | -7.870535306  |
| N413  | 1.430520619  | 0.223174831   | -7.322673779  |
| N414  | 3.496362496  | 2.240361960   | -7.356276553  |
| N415  | -1.724703870 | -2.987277646  | -10.059059687 |
| N416  | -3.291754869 | -1.178342039  | -8.474795720  |
| N417  | 8.129761781  | -7.039240791  | -5.988306480  |
| N418  | 4.254293218  | -5.691194007  | -4.367375799  |
| N419  | 3.680576497  | -6.644695125  | -6.269483386  |
| N420  | 9.226670294  | -7.459791439  | -3.058266531  |
| N421  | 0.120119513  | 2.228528301   | -0.052023178  |
| N422  | 2.638203499  | -0.443579139  | 1.460337651   |
| N423  | 0.968244466  | 1.722062424   | -0.604638901  |
| N424  | 1.958572841  | -1.297041250  | 1.238619805   |
| O425  | -6.559295229 | -5.141535252  | 1.618692908   |
| O426  | -7.244194471 | -2.802946637  | 4.486285212   |
| O427  | -5.256185221 | -5.178528832  | 6.673154007   |
| O428  | -2.466782457 | -3.942321462  | 4.969028798   |
| O429  | -3.055866296 | -0.471847204  | 5.333171132   |
| O430  | -3.285811792 | -0.951847033  | 8.955275348   |
| O431  | -0.523643867 | -3.935768071  | 9.687103841   |
| O432  | 2.192597779  | -3.752953033  | 6.149832654   |
| O433  | 1.896997827  | 0.226304729   | 6.641302185   |
| O434  | 0.872775486  | 1.882252627   | 9.684361509   |
| O435  | 1.559934462  | -0.238608749  | 12.459773875  |
| O436  | 7.056874300  | -10.330260268 | 2.070339891   |
| O437  | 8.008085945  | -7.669285412  | 5.764478839   |
| O438  | 11.597568317 | -4.549737387  | 4.558741195   |
| O439  | -5.615970490 | -0.844605996  | 0.051009621   |
| O440  | -3.691977018 | -4.390345391  | -4.011654680  |
| O441  | -7.135027192 | 2.497736135   | -0.391552421  |
| O442  | -6.339261797 | 3.044551189   | -3.332735263  |
| O443  | -9.786099446 | 1.490148251   | 2.291602978   |
| O444  | -5.663195182 | 1.530116226   | 4.491569478   |
| O445  | -4.258503025 | 5.041030948   | 3.786061686   |

|                                 |      |              |                                 |              |
|---------------------------------|------|--------------|---------------------------------|--------------|
|                                 | O446 | -6.582807192 | 7.249888392                     | 5.332302151  |
|                                 | O447 | 10.761762553 | -0.100356999                    | 4.192098599  |
|                                 | O448 | 3.551359977  | 4.684262718                     | 3.949776704  |
|                                 | O449 | 3.607128616  | 8.374150763                     | -0.669849791 |
|                                 | O450 | 0.994147486  | 10.065124928                    | -3.518931208 |
|                                 | O451 | -1.412905256 | 7.189773620                     | -1.535188555 |
|                                 | O452 | -0.697680623 | 7.195322171                     | 2.159965502  |
|                                 | O453 | 2.422917905  | 5.698766814                     | 1.459189887  |
|                                 | O454 | 0.856562243  | 11.623042587                    | 2.301596771  |
|                                 | O455 | -2.508951576 | 13.587025287                    | 0.576450369  |
|                                 | O456 | -3.268100064 | 10.992120377                    | -1.345282469 |
|                                 | O457 | -4.950099493 | 13.711903310                    | 3.622199064  |
|                                 | O458 | -5.508749534 | 6.834666520                     | -1.325862927 |
|                                 | O459 | 1.755972601  | -4.568614536                    | -8.765328490 |
|                                 | O460 | -0.276432007 | -0.734504556                    | -8.516999468 |
|                                 | O461 | 2.107365342  | 3.603059576                     | -8.532193901 |
|                                 | O462 | 5.875368402  | 4.315976672                     | -9.109630266 |
|                                 | O463 | -5.007323197 | -2.634533173                    | -8.838028521 |
|                                 | O464 | -1.460524243 | -6.605772976                    | -6.012816078 |
|                                 | O465 | 0.460431943  | -5.775425118                    | -6.787550346 |
|                                 | O466 | -3.996095510 | 2.322620730                     | -8.409755536 |
|                                 | O467 | 9.938114722  | -5.407131893                    | -3.704957120 |
|                                 | O468 | 12.657173608 | -6.982679658                    | -2.116220852 |
|                                 | O469 | 0.288960062  | -6.285443343                    | -1.330991400 |
|                                 | O470 | -0.258254441 | -7.388103988                    | 0.551397286  |
|                                 | O471 | 5.130791982  | -10.901885976                   | -3.350702777 |
|                                 | O472 | 2.869570410  | -10.947445139                   | -3.343021842 |
|                                 | O473 | 5.078048233  | -5.837586741                    | -1.307324274 |
|                                 | O474 | 5.016233481  | -7.548078653                    | 0.145885211  |
|                                 | O475 | 2.603999264  | -6.117775629                    | -2.095282363 |
|                                 | O476 | 8.949562586  | -6.562425964                    | 1.030044811  |
|                                 | O477 | 6.972262779  | -4.569761517                    | 0.384267556  |
|                                 | O478 | -4.378609879 | 4.744753800                     | -2.453670305 |
|                                 | O479 | 7.709897384  | -10.435540120                   | -2.512174018 |
|                                 | O480 | 7.508717229  | -8.635439195                    | -0.089704775 |
|                                 | S481 | 3.572761615  | 5.057574482                     | -2.484918746 |
|                                 | S482 | 2.066169851  | 1.842257751                     | -3.556125732 |
|                                 | S483 | 2.090686095  | -3.393983615                    | -3.692967203 |
|                                 | S484 | 3.909830603  | 1.855219391                     | -0.432860388 |
|                                 | S485 | 0.591015352  | -0.829106802                    | -1.807451302 |
|                                 | S486 | 4.067438019  | -0.812757698                    | -5.567011952 |
|                                 | S487 | 3.374510284  | -3.513143679                    | -0.295284463 |
|                                 | S488 | 5.610110379  | 1.769065281                     | -3.315198010 |
|                                 | S489 | 5.720579017  | -3.090061712                    | -3.048150312 |
|                                 | S490 | 6.413409653  | -0.779413139                    | -0.560934812 |
|                                 | end  |              |                                 |              |
| <b>transition state (S=3/2)</b> |      |              | <b>bm52exp347fe2captc.car_1</b> |              |
| Fe( 139) 2.294                  | C1   | -7.726107802 | -5.362056808                    | 1.269789384  |
| Fe( 140) 0.312                  | C2   | -8.143236077 | -6.505349136                    | 0.336393130  |
| Fe( 141) 2.662                  | C3   | -8.517556493 | -3.424937404                    | 2.559853486  |
| Fe( 142) -2.179                 | C4   | -7.873679835 | -3.684015788                    | 3.917598677  |
| Fe( 143) 2.218                  | C5   | -7.440176386 | -5.265656629                    | 5.731886879  |
| Fe( 144) -1.656                 | C6   | -5.915418146 | -5.384901146                    | 5.665334464  |
| Fe( 145) -1.368                 | C7   | -3.940342178 | -5.695603168                    | 4.274368235  |
|                                 | C8   | -3.434744913 | -4.251244696                    | 4.297053611  |
|                                 | C9   | -3.868623639 | -1.938796336                    | 3.582953512  |
|                                 | C10  | -3.883517792 | -1.301065710                    | 4.982085476  |
|                                 | C11  | -4.899961952 | -1.135679752                    | 7.165105438  |
|                                 | C12  | -3.848424273 | -1.685817322                    | 8.139357415  |
|                                 | C13  | -2.841452443 | -3.701342695                    | 9.118878483  |
|                                 | C14  | -1.375893485 | -4.026000358                    | 8.792613153  |
|                                 | C15  | 0.234116757  | -4.824506046                    | 7.110512170  |
|                                 | C16  | 0.969563986  | -3.666575484                    | 6.425330127  |
|                                 | C17  | 0.625354985  | -1.443142225                    | 5.373706147  |
|                                 | C18  | 0.762079973  | -0.227605900                    | 6.304748802  |
|                                 | C19  | -0.258546582 | -1.238926717                    | 4.123997054  |
|                                 | C20  | -0.029481323 | 0.119340754                     | 3.432667185  |
|                                 | C21  | -0.083432406 | -2.422900404                    | 3.161697552  |
|                                 | C22  | -0.352329401 | 1.531453487                     | 7.601027393  |
|                                 | C23  | 0.021356447  | 1.212770871                     | 9.061564870  |
|                                 | C24  | -1.678030134 | 2.318349594                     | 7.469911216  |
|                                 | C25  | -1.737988637 | 3.485306941                     | 8.461008216  |
|                                 | C26  | -1.860722091 | 2.828037281                     | 6.033441924  |
|                                 | C27  | -0.397320419 | -0.087783401                    | 11.068440003 |
|                                 | C28  | 1.069522768  | -0.350129592                    | 11.346572381 |
|                                 | C29  | 5.898749184  | -11.590525922                   | 3.760432675  |
|                                 | C30  | 6.516793777  | -10.316365146                   | 3.195974266  |
|                                 | C31  | 6.781953327  | -7.887470314                    | 3.678151937  |
|                                 | C32  | 8.001495472  | -7.489711483                    | 4.529997008  |
|                                 | C33  | 5.598010032  | -6.938012543                    | 3.918533158  |

|      |               |              |              |
|------|---------------|--------------|--------------|
| C34  | 5.929138553   | -5.495913551 | 3.550277804  |
| C35  | 4.688464362   | -4.609204039 | 3.509660802  |
| C36  | 4.904135681   | -2.109909134 | 3.546833253  |
| C37  | 10.267576950  | -6.560468200 | 4.487402258  |
| C38  | 10.502304293  | -5.067034001 | 4.474526176  |
| C39  | -5.319673312  | -2.674183783 | -1.556339421 |
| C40  | -5.687015060  | -1.242565739 | -1.119302736 |
| C41  | -3.781919579  | -2.821088320 | -1.504610954 |
| C42  | -3.242886954  | -4.261937311 | -1.621620941 |
| C43  | -2.977584989  | -4.749205598 | -3.046829152 |
| C44  | -6.185446200  | 0.996350405  | -2.024173620 |
| C45  | -7.277822406  | 1.448963470  | -1.045025642 |
| C46  | -6.365328887  | 1.603573439  | -3.421171961 |
| C47  | -9.431633249  | 0.920642370  | -0.000981371 |
| C48  | -9.035099271  | 0.944399798  | 1.478483641  |
| C49  | -7.327312528  | 0.439933364  | 3.161944450  |
| C50  | -6.154879290  | 1.399654625  | 3.371266386  |
| C51  | -4.603093944  | 3.040527855  | 2.43443151   |
| C52  | -5.046578519  | 4.347653409  | 3.133205380  |
| C53  | -4.023824566  | 3.475808338  | 1.079860203  |
| C54  | -3.405776903  | 2.413691305  | 0.233794355  |
| C55  | -2.982688854  | 1.130329499  | 0.469978669  |
| C56  | -2.549832101  | 1.599955491  | -1.665243158 |
| C57  | -6.848742630  | 6.029098799  | 3.234577493  |
| C58  | -6.758811204  | 6.184322299  | 4.751386831  |
| C59  | -8.319403491  | 6.083415942  | 2.760845182  |
| C60  | -8.944911060  | 7.442996766  | 2.650459227  |
| C61  | -8.868748400  | 8.546492450  | 3.477880330  |
| C62  | -10.203580287 | 8.961697631  | 1.758444381  |
| C63  | 9.239752804   | 1.622439459  | 3.443326668  |
| C64  | 10.262318616  | 0.512929717  | 3.274089495  |
| C65  | 7.843845804   | 0.981295398  | 3.260250032  |
| C66  | 6.710545771   | 1.958005862  | 3.471569644  |
| C67  | 6.141723992   | 2.159457399  | 4.741685312  |
| C68  | 6.189487794   | 2.696249358  | 2.393547634  |
| C69  | 5.088762580   | 3.062316300  | 4.933395073  |
| C70  | 5.154327289   | 3.614120950  | 2.571961809  |
| C71  | 4.597268418   | 3.788997346  | 3.841272215  |
| C72  | 5.378661168   | 6.866645818  | -1.382909857 |
| C73  | 4.319651391   | 7.962843202  | -1.596887294 |
| C74  | 4.714375294   | 5.527998127  | -1.075683039 |
| C75  | 3.309806536   | 9.542694750  | -3.206040978 |
| C76  | 1.834557063   | 9.165879775  | -3.366184043 |
| C77  | 0.212606951   | 7.271599284  | -3.324890308 |
| C78  | -0.255798403  | 6.926449051  | -1.887552946 |
| C79  | 0.244702944   | 6.025082235  | -4.238322046 |
| C80  | -1.008346969  | 5.147314313  | -4.346239997 |
| C81  | -2.151525513  | 5.682278524  | -5.225515734 |
| C82  | -3.671228611  | 7.603709704  | -4.741360963 |
| C83  | 0.264209010   | 5.985315049  | 0.311852825  |
| C84  | 0.112595687   | 7.209157887  | 1.227737466  |
| C85  | 1.257679107   | 5.016366213  | 0.985048451  |
| C86  | 1.203487846   | 9.272711382  | 1.963262137  |
| C87  | 0.559321210   | 10.615664815 | 1.653370202  |
| C88  | -0.856824897  | 11.877665243 | 0.123516764  |
| C89  | -2.130180191  | 12.431283274 | 0.808930672  |
| C90  | -1.023060690  | 11.882332207 | -1.398619972 |
| C91  | -2.163277169  | 11.003666592 | -1.896607990 |
| C92  | -4.074630986  | 11.947587469 | 2.221143595  |
| C93  | -3.983210200  | 13.047043353 | 3.271022402  |
| C94  | -4.729253354  | 10.677311481 | 2.833392678  |
| C95  | -4.971995007  | 9.604025479  | 1.796299641  |
| C96  | -6.158617285  | 9.594665210  | 1.046922908  |
| C97  | -4.003619652  | 8.627044981  | 1.512477576  |
| C98  | -6.365823027  | 8.657951769  | 0.032561333  |
| C99  | -4.180977241  | 7.698364471  | 0.482343389  |
| C100 | -5.362393871  | 7.731177882  | -0.252752754 |
| C101 | 4.087863712   | -3.978346616 | -8.998965180 |
| C102 | 2.660889128   | -3.728382839 | -8.544922691 |
| C103 | 1.206990273   | -2.196446008 | -7.234661112 |
| C104 | 0.708865026   | -0.838099553 | -7.742899504 |
| C105 | 1.126527235   | 1.583157640  | -7.697986263 |
| C106 | 2.296199174   | 2.543756093  | -7.903557484 |
| C107 | 4.575532606   | 3.228351417  | -7.401030703 |
| C108 | 5.184969057   | 3.370446828  | -8.782165055 |
| C109 | -2.759879815  | -3.492364477 | -9.143355956 |
| C110 | -3.787267868  | -2.404992852 | -8.805289981 |
| C111 | -2.271363552  | -4.175283620 | -7.845496207 |
| C112 | -1.535452735  | -5.492963028 | -8.149716402 |
| C113 | -0.853132858  | -6.019449475 | -6.907504131 |

|       |               |               |              |
|-------|---------------|---------------|--------------|
| C114  | -4.192209481  | -0.086418667  | -8.147571042 |
| C115  | -3.716526301  | 1.198418063   | -8.795839493 |
| C116  | -4.568763582  | 0.043841270   | -6.650571835 |
| C117  | -3.332119432  | 0.054682482   | -5.798137468 |
| C118  | -2.605237403  | 1.241488860   | -5.601691683 |
| C119  | -2.793565928  | -1.157996624  | -5.337550491 |
| C120  | -1.324096122  | 1.194200579   | -5.042636948 |
| C121  | -1.514208728  | -1.204099128  | -4.778125064 |
| C122  | -0.762426685  | -0.030310757  | -4.669596687 |
| C123  | 7.907523267   | -6.224774367  | -4.758823736 |
| C124  | 9.093833752   | -6.319093356  | -3.787779969 |
| C125  | 6.597057481   | -6.598557900  | -4.051717927 |
| C126  | 5.340240490   | -6.370460411  | -4.826500467 |
| C127  | 4.970569949   | -6.945578098  | -6.025650264 |
| C128  | 3.253145038   | -5.826954023  | -5.194710156 |
| C129  | 10.305707815  | -7.555730480  | -2.093873902 |
| C130  | 11.654881804  | -7.316767326  | -2.735348631 |
| C131  | 0.598159848   | -6.947421747  | -0.183722852 |
| C132  | 2.088221715   | -6.985062099  | 0.132254724  |
| C133  | 3.007114615   | -7.104581685  | -1.120184713 |
| C134  | 2.907030891   | -8.535556260  | -1.709633599 |
| C135  | 3.944286161   | -8.873962741  | -2.783486487 |
| C136  | 3.969543819   | -10.365073006 | -3.183869610 |
| C137  | 4.463879552   | -6.850076490  | -0.695173722 |
| C138  | 3.597311535   | -0.689984949  | -2.231569578 |
| Fe139 | 3.810611748   | -2.009330433  | -3.686912818 |
| Fe140 | 2.250132194   | 0.706876738   | -1.421133115 |
| Fe141 | 5.039618484   | 0.477135053   | -1.509248960 |
| Fe142 | 3.833029076   | 0.499235921   | -3.773005051 |
| Fe143 | 3.843986964   | 2.753483310   | -2.551987255 |
| Fe144 | 4.703629876   | -2.057482215  | -1.266675267 |
| Fe145 | 2.156911582   | -2.453471763  | -1.681786954 |
| H146  | -6.385349155  | -7.540751171  | 0.318543306  |
| H147  | -6.570451271  | -6.553307712  | -0.968210845 |
| H148  | -9.693282012  | -4.769872465  | 1.394480782  |
| H149  | -8.862552154  | -6.110726538  | -0.399268347 |
| H150  | -8.704942037  | -7.228905649  | 0.951886717  |
| H151  | -7.858524215  | -2.720328495  | 2.031581875  |
| H152  | -8.629851736  | -5.586224717  | 3.966980393  |
| H153  | -9.479229973  | -2.922084399  | 2.727407024  |
| H154  | -7.857543907  | -6.224170041  | 6.066202565  |
| H155  | -5.981307335  | -5.839584648  | 3.655081296  |
| H156  | -7.660480819  | -4.509928222  | 6.496997375  |
| H157  | -2.874787606  | -1.746126976  | 3.157594772  |
| H158  | -4.949555508  | -3.699310273  | 3.018674505  |
| H159  | -3.694256031  | -6.164679636  | 3.312503617  |
| H160  | -4.744326407  | -0.050538648  | 7.108149279  |
| H161  | -5.627095097  | -2.280904550  | 5.486496141  |
| H162  | -3.417486202  | -6.237953537  | 5.070558483  |
| H163  | -4.612782939  | -1.441734573  | 2.944525969  |
| H164  | -4.182787794  | -3.598378127  | 7.454225805  |
| H165  | -5.895068042  | -1.326423873  | 7.591151947  |
| H166  | -0.389842605  | -3.368681097  | 3.629380163  |
| H167  | -2.0699352376 | -2.280678677  | 2.259088104  |
| H168  | 0.956353761   | -2.506845449  | 2.819737574  |
| H169  | -1.293627985  | -1.240735635  | 4.486122502  |
| H170  | -3.345661674  | -4.645784894  | 9.372951639  |
| H171  | -1.866328739  | 2.010597727   | 5.300598262  |
| H172  | -1.445255549  | -0.257012167  | 9.213922731  |
| H173  | -1.682432496  | 3.150414651   | 9.506564552  |
| H174  | 0.665857013   | 0.029753546   | 2.589214932  |
| H175  | 0.358525871   | 0.889202016   | 4.114446284  |
| H176  | 9.314559401   | 1.980175660   | 4.488241907  |
| H177  | -2.816395103  | 3.363316187   | 5.937332319  |
| H178  | -2.682317752  | 4.033280508   | 8.328482042  |
| H179  | -1.050599899  | 3.528232282   | 5.770176330  |
| H180  | -0.908266957  | 4.188563313   | 8.285685028  |
| H181  | -2.503094647  | 1.620937076   | 7.703314818  |
| H182  | 0.476472479   | 2.161492729   | 7.243169212  |
| H183  | -1.288547897  | 0.023921659   | 6.388081058  |
| H184  | -0.984434532  | 0.503482942   | 3.039754717  |
| H185  | 1.551311945   | 4.244204921   | 0.258962277  |
| H186  | 0.719659009   | 4.529152331   | 1.811514686  |
| H187  | 2.666242837   | 5.318045604   | 2.330309802  |
| H188  | 3.210988918   | 4.679395343   | 4.869231136  |
| H189  | 4.752172791   | 4.167753660   | 1.723752282  |
| H190  | 6.583653925   | 2.531744638   | 1.388029474  |
| H191  | 6.516683580   | 1.593734633   | 5.599217895  |
| H192  | -0.818806702  | -2.728530957  | 6.247045614  |
| H193  | 0.208374668   | -5.665944155  | 6.403279881  |



|      |               |              |               |
|------|---------------|--------------|---------------|
| H194 | 0.833423885   | -5.130908931 | 7.977139973   |
| H195 | -1.863923537  | -4.567956261 | 6.844846234   |
| H196 | -2.821131620  | -3.067531174 | 10.013306933  |
| H197 | 4.645035050   | 3.192008470  | 5.924492262   |
| H198 | 1.653849579   | -1.651635979 | 5.054680140   |
| H199 | -0.746525611  | 0.717695289  | 11.734565772  |
| H200 | -0.944337383  | -1.007700070 | 11.327108506  |
| H201 | 1.655696263   | -0.733911947 | 10.479457590  |
| H202 | 11.139361853  | -7.066943828 | 4.045999928   |
| H203 | -1.758849344  | -5.993719200 | -4.123872340  |
| H204 | 1.211650403   | -6.063622858 | -1.779895788  |
| H205 | -2.264200815  | -6.245870245 | -8.483523888  |
| H206 | -0.801852964  | -5.341758191 | -8.954703257  |
| H207 | -3.124212014  | -4.386140603 | -7.181690922  |
| H208 | -3.118440033  | 1.046717823  | -9.725425516  |
| H209 | -3.347152293  | -4.234301127 | -9.706019183  |
| H210 | -3.342535851  | -2.196753368 | -2.300980319  |
| H211 | -3.956214007  | -4.969426960 | -1.163109531  |
| H212 | -2.280388299  | -1.025953518 | -8.423953569  |
| H213 | -5.131618726  | -0.321207782 | -8.690415210  |
| H214 | -1.036319042  | -2.405477441 | -9.551309537  |
| H215 | -1.330985308  | -5.866358244 | -2.421277014  |
| H216 | -1.617116475  | -3.476354234 | -7.301205476  |
| H217 | -1.213024518  | -3.764157689 | -10.466306899 |
| H218 | -6.733691512  | -3.456101615 | -2.844702064  |
| H219 | -3.449228761  | -2.413709274 | -0.538180150  |
| H220 | 0.833719630   | -5.285190450 | -7.593726603  |
| H221 | -2.317770751  | -4.350306864 | -1.034095272  |
| H222 | -3.826734038  | 2.601993062  | 3.077213866   |
| H223 | -3.021273181  | 0.519665293  | 1.362705304   |
| H224 | -8.141358667  | 0.783920097  | 3.814647084   |
| H225 | -7.265132309  | -0.073483408 | 1.089947675   |
| H226 | -6.923944820  | 4.079765389  | 2.351072537   |
| H227 | -8.317426217  | 8.736614540  | 4.391208303   |
| H228 | -6.906919649  | 5.228224970  | 5.310279977   |
| H229 | -8.928021813  | 5.420845356  | 3.401889608   |
| H230 | -6.263600944  | 6.832991204  | 2.760748346   |
| H231 | -10.883478821 | 9.509092974  | 1.111312839   |
| H232 | -3.264662639  | 4.246989892  | 1.286908242   |
| H233 | -4.820739159  | 3.962971644  | 0.495199002   |
| H234 | -9.834003788  | 10.440631913 | 3.245959394   |
| H235 | -8.351259367  | 5.646638758  | 1.750053883   |
| H236 | -6.172305110  | 2.009801308  | 1.379052399   |
| H237 | -7.021917782  | -0.550388857 | 3.531508692   |
| H238 | -9.879071845  | 1.902092804  | -0.211928745  |
| H239 | -2.208916411  | 1.499571192  | -2.693243214  |
| H240 | -10.212652348 | 0.161644503  | -0.137950758  |
| H241 | 10.301819142  | 3.205696072  | 2.695529992   |
| H242 | 8.694394577   | 3.308778480  | 2.421465391   |
| H243 | 1.548565414   | 5.982509439  | -1.422890723  |
| H244 | -0.722064702  | 5.499813461  | 0.284723697   |
| H245 | 1.736746802   | 8.067651204  | 0.311384548   |
| H246 | -3.437612694  | 3.538588210  | -1.609516213  |
| H247 | -5.107262717  | 4.155922950  | -2.784214495  |
| H248 | -6.715032612  | 3.389923811  | -4.153619235  |
| H249 | -4.794405962  | 5.407651173  | -1.850731302  |
| H250 | -5.544556367  | 1.241089568  | -4.061788479  |
| H251 | -7.324105685  | 1.277060039  | -3.852263562  |
| H252 | -0.069318133  | 11.617843999 | -1.875984832  |
| H253 | -1.266469178  | 12.915697683 | -1.691158521  |
| H254 | -0.909693680  | 10.158178846 | -3.313202745  |
| H255 | -2.579483380  | 9.591784227  | -3.273435072  |
| H256 | -3.661403693  | 9.216098488  | -6.012028923  |
| H257 | -2.644774640  | 4.848854709  | -5.748358035  |
| H258 | -7.302261231  | 8.653496108  | -0.531563835  |
| H259 | -3.084884913  | 8.567527143  | 2.101391340   |
| H260 | -4.706543906  | 7.760483671  | -2.965303788  |
| H261 | 1.065669579   | 5.381664445  | -3.882574717  |
| H262 | 2.342300179   | 7.199087576  | -3.227834317  |
| H263 | -1.395686951  | 4.885697266  | -3.349123947  |
| H264 | -8.363996008  | -0.227913583 | -1.468954095  |
| H265 | 3.643237345   | 10.001021501 | -4.146705814  |
| H266 | -6.087709042  | -0.955615264 | -3.050514348  |
| H267 | 0.538330426   | 6.362501131  | -5.245777327  |
| H268 | -3.386929629  | 6.991668465  | 0.237365331   |
| H269 | 3.343892584   | 10.315231085 | -2.424189421  |
| H270 | -2.911538340  | 7.789509171  | -6.652195311  |
| H271 | -5.098371233  | 8.950703973  | -4.161495886  |
| H272 | -5.168257057  | -3.515691912 | -3.430887022  |
| H273 | -5.744558725  | -3.337528717 | -0.780155839  |

|      |              |               |               |
|------|--------------|---------------|---------------|
| H274 | -6.942937092 | 10.324399784  | 1.261134171   |
| H275 | -5.258947403 | 1.394719804   | -1.586746463  |
| H276 | -0.487261600 | 8.024948062   | -3.698624976  |
| H277 | -1.736312716 | 6.341734738   | -5.997799856  |
| H278 | -0.676104663 | 4.204128615   | -4.801992352  |
| H279 | -3.604480704 | 5.868190928   | -3.680281910  |
| H280 | 0.818327348  | 8.936907115   | 2.937675760   |
| H281 | -0.457368724 | 9.761306151   | 0.097986856   |
| H282 | -0.090131456 | 12.629228588  | 0.367022033   |
| H283 | 2.282391448  | 9.450628347   | 2.064264054   |
| H284 | -2.446642525 | 10.649389532  | 1.723547776   |
| H285 | 4.607268440  | -3.020256769  | -9.146561662  |
| H286 | 4.587591167  | -4.487640382  | -8.147989540  |
| H287 | 7.866320437  | -5.166949111  | -5.058410587  |
| H288 | 5.048186419  | -5.077922227  | -10.422089646 |
| H289 | 3.512865821  | -5.569657439  | -10.133273483 |
| H290 | 5.501302644  | 4.778834052   | -0.933239830  |
| H291 | 5.717898911  | 7.436147476   | 0.547881744   |
| H292 | 4.833303621  | 8.094752326   | -3.585812266  |
| H293 | 4.116761156  | 5.609860820   | -0.157663237  |
| H294 | 6.815676668  | 8.044927565   | -0.502240274  |
| H295 | 5.372078831  | 2.896403711   | -6.717370438  |
| H296 | 5.985883802  | 6.764579907   | -2.295616432  |
| H297 | 5.288042749  | -7.010424556  | 4.974281745   |
| H298 | 7.047860673  | -7.871411693  | 2.613303339   |
| H299 | 3.642150793  | 1.412704149   | -6.777451113  |
| H300 | 5.176145391  | -0.093906760  | 3.290045235   |
| H301 | 0.558077058  | 1.551741980   | -8.635037313  |
| H302 | -1.094379377 | -2.155745957  | -4.444228646  |
| H303 | 0.472971268  | 2.057852729   | -6.945526973  |
| H304 | 4.255470076  | -4.492535711  | 4.510259021   |
| H305 | 2.139773442  | 0.023824581   | -6.580706789  |
| H306 | 3.913282605  | -5.060767637  | 2.869889886   |
| H307 | 4.761707542  | -7.299723026  | 3.298904914   |
| H308 | 6.397524036  | -5.472777680  | 2.554995632   |
| H309 | 6.653819586  | -5.064525549  | 4.258517195   |
| H310 | -5.216202699 | -0.806560223  | -6.392330060  |
| H311 | 5.925336243  | -9.445748927  | 4.895932463   |
| H312 | 4.983634848  | -11.768704627 | 3.175416809   |
| H313 | 0.253635164  | -0.052513120  | -4.283433139  |
| H314 | 6.341222513  | -11.758588503 | 5.764642751   |
| H315 | 4.786442120  | -12.127982349 | 5.407401752   |
| H316 | 5.523301658  | -3.325101803  | 2.057336671   |
| H317 | -0.741220737 | 2.107290532   | -4.909886883  |
| H318 | -3.367419085 | -2.081282447  | -5.441209255  |
| H319 | 7.617399736  | -9.938972909  | -1.666716069  |
| H320 | 6.627113620  | -7.668669206  | -3.782396109  |
| H321 | 6.618308063  | -8.185728131  | -0.100734481  |
| H322 | 6.752547539  | -10.543592811 | -2.810669141  |
| H323 | 4.956521160  | 2.538048510   | -9.490361848  |
| H324 | 6.356773959  | -5.068565142  | -0.228818506  |
| H325 | 2.285777884  | -7.800349055  | 0.838713205   |
| H326 | 3.281076212  | -2.023040008  | -7.603354075  |
| H327 | 3.022562896  | -9.235916230  | -0.867733991  |
| H328 | 3.059535487  | -6.894510042  | -6.996868798  |
| H329 | 2.245513690  | -5.445782703  | -5.097338852  |
| H330 | 6.593489553  | -12.414541635 | 3.523631209   |
| H331 | 5.765234348  | -1.067057451  | 1.976178395   |
| H332 | 8.366951928  | -5.803419797  | 0.787392267   |
| H333 | 7.226985997  | -3.785367866  | -0.162844293  |
| H334 | 8.972832556  | -6.851032727  | 2.796049279   |
| H335 | 3.704036766  | -2.704930081  | 5.151657153   |
| H336 | 3.735041664  | -8.289143689  | -3.692307344  |
| H337 | 4.951635726  | -8.593506917  | -2.447600568  |
| H338 | 1.891401696  | -8.677864265  | -2.110003568  |
| H339 | 1.346105150  | -2.170532921  | -6.141865486  |
| H340 | -3.028844991 | 2.190734076   | -5.938207439  |
| H341 | -5.151543884 | 0.970908717   | -6.543073126  |
| H342 | 2.308191987  | -6.034720633  | 0.647501916   |
| H343 | 8.505437096  | -7.339518668  | 0.581819306   |
| H344 | 7.411358209  | -9.256484086  | 0.675014853   |
| H345 | 4.153390081  | -1.043989115  | 5.124128254   |
| H346 | 5.520021480  | -7.579561901  | -6.709591164  |
| H347 | 6.532192799  | -6.052588173  | -3.102765738  |
| H348 | 0.457465781  | -2.949239318  | -7.485512463  |
| H349 | 4.235268729  | 4.218535470   | -7.061090830  |
| H350 | 7.761423298  | 0.147898171   | 3.973158992   |
| H351 | 7.789507530  | 0.559754981   | 2.243950440   |
| H352 | 8.979104569  | -6.713033174  | -6.438529276  |
| H353 | 8.260501597  | -8.005829104  | -5.736646352  |

|       |              |               |               |
|-------|--------------|---------------|---------------|
| H354  | 10.309169766 | -8.582760755  | -1.696463221  |
| H355  | 8.545570918  | -8.224624225  | -3.095419605  |
| H356  | 11.698113093 | -7.546281148  | -3.827412147  |
| H357  | 10.171161137 | -6.871613728  | -1.240957076  |
| H358  | 10.543712970 | 0.306117104   | 2.212911081   |
| H359  | -2.973439926 | 13.185621582  | 3.724563742   |
| H360  | 10.195565603 | -6.867293935  | 5.545891486   |
| H361  | 9.581508521  | -4.440224266  | 4.386245863   |
| H362  | -4.713775781 | 12.320344918  | 1.403536469   |
| H363  | -4.085091662 | 10.296462702  | 3.641510350   |
| H364  | -5.678647082 | 10.989922081  | 3.291599780   |
| H365  | 1.105479000  | -3.283470823  | -0.965211932  |
| H366  | 3.730335122  | -1.139287989  | 0.094073357   |
| H367  | -6.458613214 | 6.800438000   | -1.568416928  |
| H368  | 0.155208809  | -0.985642779  | -0.504712098  |
| H369  | -2.008612937 | -0.245765904  | -0.868401886  |
| M0370 | 3.829548527  | -4.415758931  | -2.375424709  |
| N371  | -7.074009430 | -7.200005786  | -0.356661835  |
| N372  | -8.757241910 | -4.614793285  | 1.761028553   |
| N373  | -8.063483039 | -4.906029070  | 4.468102774   |
| N374  | -5.381225612 | -5.766280118  | 4.477897292   |
| N375  | -4.162756373 | -3.363915898  | 3.571321301   |
| N376  | -4.847192256 | -1.717630940  | 5.835648829   |
| N377  | -3.622083100 | -3.024997384  | 8.090344275   |
| N378  | -1.120296833 | -4.521372875  | 7.546733336   |
| N379  | 0.183939923  | -2.611736967  | 6.114967108   |
| N380  | -0.388982309 | 0.328071366   | 6.768841530   |
| N381  | -0.648750216 | 0.199083544   | 9.666723637   |
| N382  | 5.546104255  | -11.483494023 | 5.183196905   |
| N383  | 6.383065966  | -9.245300580  | 4.000428827   |
| N384  | 5.035720997  | -3.299987888  | 2.956095483   |
| N385  | 4.301570593  | -1.976966402  | 4.747988743   |
| N386  | 5.405355202  | -1.019729782  | 2.939991481   |
| N387  | 9.036548951  | -6.957917108  | 3.832866975   |
| N388  | -5.850376021 | -2.945111763  | -2.897666548  |
| N389  | -1.956748116 | -5.612794350  | -3.192399819  |
| N390  | -6.075677993 | -0.446238957  | -2.150471345  |
| N391  | -8.355089122 | 0.638727657   | -0.935405176  |
| N392  | -7.854907487 | 0.350787855   | 1.813332025   |
| N393  | -5.686667082 | 2.078003825   | 2.277891714   |
| N394  | -3.124750464 | 2.671289024   | -1.102099242  |
| N395  | -2.467537938 | 0.655067584   | -0.720870732  |
| N396  | -6.320087806 | 4.725382901   | 2.853938853   |
| N397  | -9.781957446 | 7.715163595   | 1.580188655   |
| N398  | -9.672447714 | 9.501384667   | 2.892022645   |
| N399  | 9.481349027  | 2.654228004   | 2.432576622   |
| N400  | 6.284684184  | 7.200310445   | -0.273080506  |
| N401  | 4.213189214  | 8.457081957   | -2.866284136  |
| N402  | 1.554411724  | 7.846242901   | -3.337015004  |
| N403  | -3.174099989 | 6.400021157   | -4.458329635  |
| N404  | -3.351339160 | 8.260240753   | -5.870146177  |
| N405  | -4.455356870 | 8.233534829   | -3.836961302  |
| N406  | 0.649849271  | 6.332790927   | -1.058169037  |
| N407  | 0.975685866  | 8.233762108   | 0.976105479   |
| N408  | -0.365102002 | 10.616451028  | 0.645462391   |
| N409  | -1.887236908 | 10.296328468  | -3.026694366  |
| N410  | -2.753653814 | 11.618509114  | 1.698110921   |
| N411  | 4.099023418  | -4.738310840  | -10.251347711 |
| N412  | 2.463314723  | -2.580010797  | -7.865697154  |
| N413  | 1.434649093  | 0.217973054   | -7.312499674  |
| N414  | 3.498942718  | 2.251692251   | -7.345856423  |
| N415  | -1.723578545 | -2.983135115  | -10.049784448 |
| N416  | -3.292651735 | -1.178742698  | -8.468638417  |
| N417  | 8.115896370  | -7.021335990  | -5.981931659  |
| N418  | 4.251886860  | -5.657340277  | -4.327889965  |
| N419  | 3.657425712  | -6.588689252  | -6.234149971  |
| N420  | 9.222606718  | -7.458449216  | -3.056158422  |
| N421  | 0.109619695  | 2.273114047   | -0.126332158  |
| N422  | 2.658607007  | -0.628019569  | 0.391661985   |
| N423  | 0.953650191  | 1.718078460   | -0.629222426  |
| N424  | 1.908155610  | -1.104475937  | 1.145254479   |
| O425  | -6.547634114 | -5.145581332  | 1.602372964   |
| O426  | -7.209792372 | -2.791431826  | 4.472994474   |
| O427  | -5.224737578 | -5.150522707  | 6.670661006   |
| O428  | -2.441080310 | -3.916686946  | 4.958841691   |
| O429  | -3.041731798 | -0.446877938  | 5.298403832   |
| O430  | -3.291052177 | -0.927642472  | 8.952349918   |
| O431  | -0.501784502 | -3.886932553  | 9.657061818   |
| O432  | 2.187918503  | -3.745989552  | 6.179145436   |
| O433  | 1.887721938  | 0.197065427   | 6.613652364   |

|                                  |              |                              |              |             |
|----------------------------------|--------------|------------------------------|--------------|-------------|
| O434                             | 0.893084396  | 1.866456001                  | 9.659191708  |             |
| O435                             | 1.573883972  | -0.218377776                 | 12.451170634 |             |
| O436                             | 7.058764744  | -10.328239651                | 2.072106653  |             |
| O437                             | 7.998001982  | -7.651884768                 | 5.763429096  |             |
| O438                             | 11.608518926 | -4.559191728                 | 4.569812723  |             |
| O439                             | -5.614728998 | -0.847748684                 | 0.060973580  |             |
| O440                             | -3.687035307 | -4.385202210                 | -4.013248044 |             |
| O441                             | -7.143154003 | 2.495328605                  | -0.385640695 |             |
| O442                             | -6.336579419 | 3.041385432                  | -3.326767742 |             |
| O443                             | -9.793040208 | 1.481907114                  | 2.296396981  |             |
| O444                             | -5.663909008 | 1.531625903                  | 4.495784959  |             |
| O445                             | -4.261837750 | 5.031918508                  | 3.795157330  |             |
| O446                             | -6.591504188 | 7.245355628                  | 5.327626490  |             |
| O447                             | 10.736199356 | -0.130254362                 | 4.199515126  |             |
| O448                             | 3.549210194  | 4.682467947                  | 3.954872867  |             |
| O449                             | 3.605005085  | 8.385006062                  | -0.671068234 |             |
| O450                             | 0.989591900  | 10.068546788                 | -3.520460664 |             |
| O451                             | -1.415656828 | 7.187053105                  | -1.530789134 |             |
| O452                             | -0.702173397 | 7.207156169                  | 2.159778596  |             |
| O453                             | 2.415237896  | 5.703572057                  | 1.466099641  |             |
| O454                             | 0.860493632  | 11.629068326                 | 2.295212944  |             |
| O455                             | -2.508163584 | 13.588397036                 | 0.577153742  |             |
| O456                             | -3.272132382 | 10.984347849                 | -1.343459686 |             |
| O457                             | -4.943345471 | 13.713005063                 | 3.622297732  |             |
| O458                             | -5.512182217 | 6.831099637                  | -1.328232947 |             |
| O459                             | 1.757535290  | -4.570104871                 | -8.771396469 |             |
| O460                             | -0.276359452 | -0.737607890                 | -8.502907520 |             |
| O461                             | 2.101688892  | 3.600930928                  | -8.526318004 |             |
| O462                             | 5.904437529  | 4.303010338                  | -9.100540171 |             |
| O463                             | -5.007017527 | -2.639557638                 | -8.819500157 |             |
| O464                             | -1.449132771 | -6.609237047                 | -6.012674222 |             |
| O465                             | 0.466534195  | -5.768883667                 | -6.789860440 |             |
| O466                             | -3.994249791 | 2.321383732                  | -8.397724423 |             |
| O467                             | 9.939143554  | -5.406986232                 | -3.700641633 |             |
| O468                             | 12.650517744 | -6.970833312                 | -2.115902451 |             |
| O469                             | 0.277529934  | -6.298797743                 | -1.313315912 |             |
| O470                             | -0.260462063 | -7.418228121                 | 0.558657833  |             |
| O471                             | 5.121517164  | -10.903975161                | -3.346757210 |             |
| O472                             | 2.859953698  | -10.945891095                | -3.350103526 |             |
| O473                             | 5.076151604  | -5.859536784                 | -1.287442363 |             |
| O474                             | 5.006483754  | -7.581805734                 | 0.154719353  |             |
| O475                             | 2.605335031  | -6.113819548                 | -2.066168699 |             |
| O476                             | 8.949542532  | -6.565143879                 | 1.027913800  |             |
| O477                             | 6.987213621  | -4.575150714                 | 0.358208891  |             |
| O478                             | -4.375057481 | 4.742807842                  | -2.452014393 |             |
| O479                             | 7.703989752  | -10.436468314                | -2.510241480 |             |
| O480                             | 7.505920530  | -8.635724551                 | -0.091452965 |             |
| S481                             | 3.595157194  | 4.964476744                  | -2.433159543 |             |
| S482                             | 2.082704040  | 1.812521290                  | -3.490316128 |             |
| S483                             | 2.064815214  | -3.408777103                 | -3.625217942 |             |
| S484                             | 3.836804291  | 2.078358386                  | -0.440420280 |             |
| S485                             | 0.539968650  | -0.884078735                 | -1.804609959 |             |
| S486                             | 4.001227366  | -0.793361939                 | -5.538552594 |             |
| S487                             | 3.400137012  | -3.524845991                 | -0.210813958 |             |
| S488                             | 5.657513313  | 1.697934562                  | -3.301957543 |             |
| S489                             | 5.674452414  | -3.057267408                 | -2.999566097 |             |
| S490                             | 6.321264092  | -0.876417458                 | -0.347264805 |             |
| end                              |              |                              |              |             |
| product <b>Fe2-NH-N-b (=3/2)</b> |              | <b>bm52capexp347tb.car_5</b> |              |             |
| Fe( 139) 2.314                   | C1           | -7.724180018                 | -5.349614055 | 1.284866943 |
| Fe( 140) 0.042                   | C2           | -8.061496756                 | -6.512273481 | 0.344053157 |
| Fe( 141) 2.653                   | C3           | -8.634050408                 | -3.468731807 | 2.579142324 |
| Fe( 142) -2.372                  | C4           | -8.002458282                 | -3.737334638 | 3.943437791 |
| Fe( 143) 2.260                   | C5           | -7.587767472                 | -5.344068582 | 5.741653737 |
| Fe( 144) -2.021                  | C6           | -6.060825446                 | -5.452271775 | 5.687893874 |
| Fe( 145) -0.659                  | C7           | -4.074204184                 | -5.762964302 | 4.304618258 |
|                                  | C8           | -3.535691684                 | -4.330069349 | 4.343083075 |
|                                  | C9           | -3.937312198                 | -1.992126992 | 3.717018757 |
|                                  | C10          | -3.951898394                 | -1.382600844 | 5.126807943 |
|                                  | C11          | -4.974174016                 | -1.255980752 | 7.306403565 |
|                                  | C12          | -3.884444920                 | -1.820852897 | 8.230578943 |
|                                  | C13          | -2.868836363                 | -3.849831165 | 9.161581496 |
|                                  | C14          | -1.393323641                 | -4.107588242 | 8.826931540 |
|                                  | C15          | 0.260509713                  | -4.694100355 | 7.098397003 |
|                                  | C16          | 0.978366115                  | -3.559959133 | 6.363433512 |
|                                  | C17          | 0.632691007                  | -1.295493495 | 5.371935641 |
|                                  | C18          | 0.765290541                  | -0.087369627 | 6.315248101 |
|                                  | C19          | -0.290225475                 | -1.078599381 | 4.153697696 |
|                                  | C20          | -0.032350895                 | 0.283503882  | 3.501638103 |
|                                  | C21          | -0.160632649                 | -2.257508526 | 3.179847263 |

|      |               |               |              |
|------|---------------|---------------|--------------|
| C22  | -0.390399132  | 1.620197875   | 7.654730609  |
| C23  | -0.030896397  | 1.259588126   | 9.107672701  |
| C24  | -1.727980871  | 2.387856579   | 7.528695986  |
| C25  | -1.805230421  | 3.546991079   | 8.527795325  |
| C26  | -1.919499736  | 2.902552610   | 6.095646913  |
| C27  | -0.428556040  | -0.145120423  | 11.042528553 |
| C28  | 1.038077392   | -0.414279161  | 11.316704697 |
| C29  | 5.877269858   | -11.629380356 | 3.698582984  |
| C30  | 6.517035774   | -10.352806735 | 3.166334420  |
| C31  | 6.819988458   | -7.939753753  | 3.686471575  |
| C32  | 8.044919616   | -7.546481806  | 4.531594386  |
| C33  | 5.639862978   | -6.985905087  | 3.932910217  |
| C34  | 5.962487472   | -5.542229945  | 3.557167043  |
| C35  | 4.706201681   | -4.676835921  | 3.495305263  |
| C36  | 4.879137557   | -2.178439242  | 3.561364969  |
| C37  | 10.287352239  | -6.554612949  | 4.464515963  |
| C38  | 10.464455155  | -5.052720967  | 4.465193604  |
| C39  | -5.323174963  | -2.667134607  | -1.582708885 |
| C40  | -5.686908388  | -1.232852814  | -1.153953357 |
| C41  | -3.786851704  | -2.813882132  | -1.518334165 |
| C42  | -3.237508423  | -4.250926121  | -1.632937418 |
| C43  | -2.974998797  | -4.747770235  | -3.055103102 |
| C44  | -6.163081392  | 1.005203858   | -2.066446631 |
| C45  | -7.248351554  | 1.469485294   | -1.084574951 |
| C46  | -6.342429635  | 1.610038194   | -3.464555483 |
| C47  | -9.406602355  | 0.966487876   | -0.037684665 |
| C48  | -9.010920785  | 0.969079433   | 1.442094187  |
| C49  | -7.315133196  | 0.419386030   | 3.122190302  |
| C50  | -6.137679100  | 1.370945040   | 3.344069943  |
| C51  | -4.598050910  | 3.036534683   | 2.428498151  |
| C52  | -5.031103164  | 4.347412679   | 3.125565911  |
| C53  | -4.010747075  | 3.470115711   | 1.077806370  |
| C54  | -3.372319424  | 2.413683173   | 0.238706809  |
| C55  | -2.886901179  | 1.153815722   | 0.484156099  |
| C56  | -2.470484968  | 1.630212896   | -1.651489384 |
| C57  | -6.822892407  | 6.033229638   | 3.246034207  |
| C58  | -6.703577589  | 6.202986006   | 4.759989505  |
| C59  | -8.306513989  | 6.093053895   | 2.808050020  |
| C60  | -8.920363294  | 7.457397202   | 2.684536313  |
| C61  | -8.859565792  | 8.557045734   | 3.518434636  |
| C62  | -10.148151266 | 8.987952115   | 1.768045432  |
| C63  | 9.251864290   | 1.659019264   | 3.394567439  |
| C64  | 10.291484072  | 0.567319136   | 3.219214232  |
| C65  | 7.862778823   | 0.996675284   | 3.220134494  |
| C66  | 6.721621873   | 1.961442135   | 3.437853147  |
| C67  | 6.136290533   | 2.135399815   | 4.704207250  |
| C68  | 6.221051190   | 2.730684709   | 2.371465162  |
| C69  | 5.086738916   | 3.041026477   | 4.903608565  |
| C70  | 5.192659533   | 3.653570240   | 2.559195817  |
| C71  | 4.619923535   | 3.802948942   | 3.824656500  |
| C72  | 5.381458306   | 6.858237216   | -1.422226678 |
| C73  | 4.321453820   | 7.953736912   | -1.623547039 |
| C74  | 4.719082063   | 5.519924247   | -1.095943640 |
| C75  | 3.302632048   | 9.536537814   | -3.223142492 |
| C76  | 1.827839516   | 9.159254050   | -3.386293970 |
| C77  | 0.207777970   | 7.259540437   | -3.338041765 |
| C78  | -0.257130194  | 6.914603914   | -1.898878536 |
| C79  | 0.243251972   | 6.014214887   | -4.253589271 |
| C80  | -1.006942260  | 5.132578666   | -4.366741801 |
| C81  | -2.153626873  | 5.674893345   | -5.236375669 |
| C82  | -3.681480430  | 7.585569226   | -4.753064205 |
| C83  | 0.282167338   | 5.963309822   | 0.295858212  |
| C84  | 0.114969882   | 7.173591922   | 1.225198760  |
| C85  | 1.300345581   | 5.004530151   | 0.948876346  |
| C86  | 1.188419680   | 9.237833715   | 1.985246472  |
| C87  | 0.555837989   | 10.587469640  | 1.680129337  |
| C88  | -0.837761297  | 11.866720232  | 0.142595447  |
| C89  | -2.116067090  | 12.420397084  | 0.816600969  |
| C90  | -0.980962444  | 11.875849507  | -1.381735122 |
| C91  | -2.139513476  | 11.034744314  | -1.904286084 |
| C92  | -4.062818817  | 11.937505782  | 2.220944595  |
| C93  | -3.980866519  | 13.046887021  | 3.262488119  |
| C94  | -4.723523466  | 10.674793170  | 2.837776480  |
| C95  | -4.964822393  | 9.600849753   | 1.802349543  |
| C96  | -6.135581971  | 9.610969907   | 1.029511188  |
| C97  | -4.007223022  | 8.608090678   | 1.540999408  |
| C98  | -6.337626839  | 8.676329179   | 0.012849187  |
| C99  | -4.180920563  | 7.678143370   | 0.511302189  |
| C100 | -5.346592094  | 7.729637904   | -0.247205124 |
| C101 | 4.064598023   | -3.999528122  | -9.013637072 |

|       |              |               |              |
|-------|--------------|---------------|--------------|
| C102  | 2.637675622  | -3.734931841  | -8.566118081 |
| C103  | 1.182093774  | -2.174972073  | -7.293639176 |
| C104  | 0.677607016  | -0.825394553  | -7.816066798 |
| C105  | 1.079023427  | 1.603120161   | -7.773262192 |
| C106  | 2.265892214  | 2.548100555   | -7.957019451 |
| C107  | 4.559677664  | 3.175396369   | -7.454468398 |
| C108  | 5.104927909  | 3.400557608   | -8.850927775 |
| C109  | -2.749343897 | -3.495595513  | -9.173289906 |
| C110  | -3.773181293 | -2.399052346  | -8.854466631 |
| C111  | -2.260076139 | -4.159554014  | -7.866109747 |
| C112  | -1.545927379 | -5.492421772  | -8.157216112 |
| C113  | -0.884351508 | -6.027256522  | -6.908010361 |
| C114  | -4.168746896 | -0.078779703  | -8.193522481 |
| C115  | -3.688554197 | 1.204830978   | -8.841018895 |
| C116  | -4.527901067 | 0.048769567   | -6.691986167 |
| C117  | -3.297572370 | 0.029494798   | -5.826768044 |
| C118  | -2.545332203 | 1.197987829   | -5.612858666 |
| C119  | -2.811372977 | -1.190441147  | -5.327730794 |
| C120  | -1.302226462 | 1.127171008   | -4.975290614 |
| C121  | -1.571979223 | -1.259985726  | -4.684666029 |
| C122  | -0.803104237 | -0.101879176  | -4.533643607 |
| C123  | 7.941604575  | -6.284139638  | -4.806600085 |
| C124  | 9.108697681  | -6.347370610  | -3.808669603 |
| C125  | 6.620939152  | -6.602068810  | -4.088768346 |
| C126  | 5.367395311  | -6.412033227  | -4.879362352 |
| C127  | 5.010603575  | -7.041252097  | -6.054447354 |
| C128  | 3.282863167  | -5.885918892  | -5.290574056 |
| C129  | 10.315296647 | -7.557204079  | -2.094985337 |
| C130  | 11.672617218 | -7.340719274  | -2.728106847 |
| C131  | 0.638048850  | -6.838003399  | -0.216319131 |
| C132  | 2.128479128  | -6.881116225  | 0.104937526  |
| C133  | 3.048848505  | -7.047228724  | -1.141314458 |
| C134  | 2.959990542  | -8.498952227  | -1.679388121 |
| C135  | 3.993474275  | -8.858138255  | -2.749658999 |
| C136  | 4.009136574  | -10.351599389 | -3.140978666 |
| C137  | 4.506202295  | -6.767546090  | -0.731646740 |
| C138  | 3.598246602  | -0.700290494  | -2.249825070 |
| Fe139 | 3.800698734  | -1.995141653  | -3.804567280 |
| Fe140 | 2.270308319  | 0.588063551   | -1.205745125 |
| Fe141 | 5.014529702  | 0.502319861   | -1.556712290 |
| Fe142 | 3.742100480  | 0.527610513   | -3.792508263 |
| Fe143 | 3.770709808  | 2.736796542   | -2.526360073 |
| Fe144 | 4.797827885  | -2.066564927  | -1.469364188 |
| Fe145 | 2.284667965  | -2.298559609  | -1.749772693 |
| H146  | -6.267072556 | -7.484894297  | 0.387307526  |
| H147  | -6.442058442 | -6.501478267  | -0.903854080 |
| H148  | -9.719580656 | -4.845026279  | 1.357066200  |
| H149  | -8.774871862 | -6.157072897  | -0.417190128 |
| H150  | -8.609377935 | -7.255572150  | 0.948892518  |
| H151  | -7.997328438 | -2.722111459  | 2.082250504  |
| H152  | -8.760831138 | -5.641035483  | 3.962828148  |
| H153  | -9.621969408 | -3.015607052  | 2.739010575  |
| H154  | -8.002714793 | -6.310728396  | 6.055553435  |
| H155  | -6.109999172 | -5.886363896  | 3.673058335  |
| H156  | -7.820844560 | -4.605388180  | 6.519509770  |
| H157  | -2.932990814 | -1.826325840  | 3.307860565  |
| H158  | -5.098395207 | -3.703979505  | 3.156626257  |
| H159  | -3.835676483 | -6.221665608  | 3.335503101  |
| H160  | -4.835147700 | -0.167167097  | 7.279481928  |
| H161  | -5.719946220 | -2.343973695  | 5.594083503  |
| H162  | -3.561087430 | -6.327757091  | 5.091977476  |
| H163  | -4.656819629 | -1.458185893  | 3.080975746  |
| H164  | -4.273508582 | -3.728587475  | 7.551243995  |
| H165  | -5.956254605 | -1.477848443  | 7.746724644  |
| H166  | -0.472219919 | -3.197453172  | 3.657464322  |
| H167  | -0.811475997 | -2.105381983  | 2.303899090  |
| H168  | 0.866236584  | -2.362828097  | 2.805898605  |
| H169  | -1.320788080 | -1.066674689  | 4.534710770  |
| H170  | -3.331427479 | -4.826582509  | 9.367519002  |
| H171  | -1.944296414 | 2.086453028   | 5.361575658  |
| H172  | -1.461989723 | -0.254996014  | 9.179598577  |
| H173  | -1.760939149 | 3.205186674   | 9.571577471  |
| H174  | 0.997016148  | 0.365191348   | 3.136282399  |
| H175  | -0.226198928 | 1.110750089   | 4.199820887  |
| H176  | 9.326798178  | 2.020936543   | 4.437633315  |
| H177  | -2.869250550 | 3.448981416   | 6.008628940  |
| H178  | -2.751051372 | 4.090624778   | 8.387754656  |
| H179  | -1.103810221 | 3.591678837   | 5.821472832  |
| H180  | -0.977643669 | 4.256207982   | 8.367198187  |
| H181  | -2.544423950 | 1.678460382   | 7.756807712  |

|      |               |              |               |
|------|---------------|--------------|---------------|
| H182 | 0.431007942   | 2.273678813  | 7.323629025   |
| H183 | -1.292950669  | 0.111144513  | 6.421952922   |
| H184 | -0.688798599  | 0.416684967  | 2.628065248   |
| H185 | 1.612744004   | 4.258257445  | 0.203128084   |
| H186 | 0.778661384   | 4.484891723  | 1.764759137   |
| H187 | 2.685746035   | 5.327717631  | 2.313560397   |
| H188 | 3.230626090   | 4.685725598  | 4.855391755   |
| H189 | 4.807735578   | 4.233681580  | 1.720351692   |
| H190 | 6.625961550   | 2.587564810  | 1.367015643   |
| H191 | 6.495696076   | 1.545305032  | 5.552426692   |
| H192 | -0.750180587  | -2.519094051 | 6.431859590   |
| H193 | 0.259672679   | -5.565658168 | 6.427041084   |
| H194 | 0.856775351   | -4.950784938 | 7.983666929   |
| H195 | -1.834016786  | -4.427424424 | 6.813544258   |
| H196 | -2.871853395  | -3.263312924 | 10.088190631  |
| H197 | 4.630161683   | 3.148116824  | 5.891440449   |
| H198 | 1.651152747   | -1.494028118 | 5.017407634   |
| H199 | -0.780426277  | 0.628899328  | 11.743081630  |
| H200 | -0.976263927  | -1.075076990 | 11.259716570  |
| H201 | 1.632881478   | -0.753994355 | 10.436719006  |
| H202 | 11.169072068  | -7.023518358 | 4.001319964   |
| H203 | -1.738143005  | -5.970428531 | -4.133711102  |
| H204 | 1.290535217   | -6.024094292 | -1.842314476  |
| H205 | -2.287923757  | -6.232158726 | -8.489812692  |
| H206 | -0.804686780  | -5.357841633 | -8.957895003  |
| H207 | -3.111558372  | -4.348995168 | -7.194271518  |
| H208 | -3.093496906  | 1.052702930  | -9.772270437  |
| H209 | -3.342476107  | -4.246019616 | -9.718621303  |
| H210 | -3.340903631  | -2.182539913 | -2.305037049  |
| H211 | -3.940759599  | -4.963242852 | -1.168125039  |
| H212 | -2.260811324  | -1.025695743 | -8.472839470  |
| H213 | -5.113861385  | -0.308892953 | -8.728066536  |
| H214 | -1.032887098  | -2.410714969 | -9.616017231  |
| H215 | -1.281835391  | -5.805357104 | -2.441109884  |
| H216 | -1.593826401  | -3.461390125 | -7.335927271  |
| H217 | -1.200476615  | -3.798613292 | -10.487000969 |
| H218 | -6.739451969  | -3.441256086 | -2.871924365  |
| H219 | -3.464928146  | -2.407051761 | -0.548144490  |
| H220 | 0.815059388   | -5.305504799 | -7.569053668  |
| H221 | -2.309658425  | -4.326799720 | -1.048357930  |
| H222 | -3.829969480  | 2.588686043  | 3.074913069   |
| H223 | -2.903276080  | 0.547969867  | 1.381425680   |
| H224 | -8.127754136  | 0.756759501  | 3.780513838   |
| H225 | -7.254774677  | -0.070722364 | 1.044836637   |
| H226 | -6.923028712  | 4.077052901  | 2.379913302   |
| H227 | -8.332665918  | 8.739685469  | 4.447755656   |
| H228 | -6.850659339  | 5.253250810  | 5.331188176   |
| H229 | -8.905282734  | 5.451991153  | 3.479399930   |
| H230 | -6.245261250  | 6.831688224  | 2.754419146   |
| H231 | -10.805930261 | 9.543366537  | 1.105289950   |
| H232 | -3.256790149  | 4.244901293  | 1.291434523   |
| H233 | -4.804623394  | 3.954907450  | 0.486723923   |
| H234 | -9.810699234  | 10.456657272 | 3.273360303   |
| H235 | -8.371238206  | 5.637144972  | 1.807223417   |
| H236 | -6.168430660  | 2.018661933  | 1.362787835   |
| H237 | -7.014849560  | -0.577822862 | 3.476671182   |
| H238 | -9.835553724  | 1.958183836  | -0.239794880  |
| H239 | -2.123893460  | 1.538020350  | -2.678207689  |
| H240 | -10.201871041 | 0.223322280  | -0.180708420  |
| H241 | 10.287307365  | 3.256333891  | 2.639564701   |
| H242 | 8.678721352   | 3.335362562  | 2.369023305   |
| H243 | 1.553734162   | 5.983421905  | -1.442263800  |
| H244 | -0.695559228  | 5.460288118  | 0.268561757   |
| H245 | 1.728578001   | 8.056171794  | 0.317845386   |
| H246 | -3.439564936  | 3.529428591  | -1.611839287  |
| H247 | -5.106438605  | 4.156833749  | -2.795381765  |
| H248 | -6.683907439  | 3.393078766  | -4.208395565  |
| H249 | -4.789989111  | 5.399057141  | -1.848448928  |
| H250 | -5.516304328  | 1.252520294  | -4.101090358  |
| H251 | -7.296768113  | 1.276143942  | -3.900684484  |
| H252 | -0.027537246  | 11.584107231 | -1.844370919  |
| H253 | -1.186274750  | 12.916133514 | -1.679348939  |
| H254 | -0.910301584  | 10.209482730 | -3.354601201  |
| H255 | -2.600278280  | 9.702553078  | -3.347538951  |
| H256 | -3.764795143  | 9.144535071  | -6.078943800  |
| H257 | -2.651536299  | 4.846262934  | -5.762750893  |
| H258 | -7.260098965  | 8.689260403  | -0.573547841  |
| H259 | -3.101493980  | 8.537862871  | 2.148710481   |
| H260 | -4.660540313  | 7.780891067  | -2.950685673  |
| H261 | 1.065266710   | 5.372464270  | -3.897971100  |

|      |              |               |               |
|------|--------------|---------------|---------------|
| H262 | 2.336006275  | 7.194304914   | -3.239477829  |
| H263 | -1.389352408 | 4.857958044   | -3.371329524  |
| H264 | -8.352345930 | -0.196250265  | -1.503742145  |
| H265 | 3.635533914  | 10.004019094  | -4.159369495  |
| H266 | -6.077296708 | -0.949255157  | -3.089163081  |
| H267 | 0.536641683  | 6.354484347   | -5.260174442  |
| H268 | -3.396445395 | 6.954170810   | 0.287728945   |
| H269 | 3.335405310  | 10.302569203  | -2.434693821  |
| H270 | -3.064465022 | 7.698807486   | -6.713159480  |
| H271 | -5.109755078 | 8.928665750   | -4.167793352  |
| H272 | -5.172261291 | -3.529154399  | -3.446380045  |
| H273 | -5.756432449 | -3.325240459  | -0.806234967  |
| H274 | -6.908219881 | 10.358499424  | 1.223730096   |
| H275 | -5.229932212 | 1.392397601   | -1.631733841  |
| H276 | -0.495144620 | 8.011355893   | -3.710731065  |
| H277 | -1.739273876 | 6.341550090   | -6.003267767  |
| H278 | -0.673684292 | 4.195522412   | -4.835734731  |
| H279 | -3.586327351 | 5.865738955   | -3.669241245  |
| H280 | 0.787360887  | 8.893576077   | 2.950248285   |
| H281 | -0.456053623 | 9.748820788   | 0.112713598   |
| H282 | -0.070135321 | 12.612250487  | 0.402015898   |
| H283 | 2.266579473  | 9.409995076   | 2.103937972   |
| H284 | -2.433971779 | 10.638927592  | 1.732943289   |
| H285 | 4.588765381  | -3.046923472  | -9.178536137  |
| H286 | 4.556946358  | -4.489430222  | -8.146199942  |
| H287 | 7.921345886  | -5.240731579  | -5.154522024  |
| H288 | 5.027287616  | -5.138000478  | -10.402546370 |
| H289 | 3.490390117  | -5.618221265  | -10.104298791 |
| H290 | 5.505499952  | 4.767922855   | -0.960903413  |
| H291 | 5.765253518  | 7.440051744   | 0.498740888   |
| H292 | 4.823592723  | 8.089087086   | -3.615218173  |
| H293 | 4.139492568  | 5.607618688   | -0.167650761  |
| H294 | 6.835976804  | 8.041174773   | -0.581973934  |
| H295 | 5.383793674  | 2.771984881   | -6.844625471  |
| H296 | 5.971414226  | 6.746971253   | -2.344888538  |
| H297 | 5.337157755  | -7.056065895  | 4.990971532   |
| H298 | 7.082270326  | -7.919761933  | 2.620754641   |
| H299 | 3.607031562  | 1.350183250   | -6.889190445  |
| H300 | 5.112732987  | -0.155865497  | 3.323397660   |
| H301 | 0.538397786  | 1.565804614   | -8.727154059  |
| H302 | -1.196673032 | -2.218683767  | -4.319325409  |
| H303 | 0.409410479  | 2.091166448   | -7.044033384  |
| H304 | 4.255933564  | -4.566528981  | 4.488768943   |
| H305 | 2.061210514  | 0.057293096   | -6.613892378  |
| H306 | 3.950389700  | -5.146230418  | 2.845518517   |
| H307 | 4.799716636  | -7.350328687  | 3.319971481   |
| H308 | 6.444395787  | -5.520703190  | 2.568713837   |
| H309 | 6.670396196  | -5.097062415  | 4.273885459   |
| H310 | -5.192441582 | -0.789316310  | -6.436985250  |
| H311 | 5.949416410  | -9.506899799  | 4.887928553   |
| H312 | 4.973821061  | -11.790568523 | 3.091498322   |
| H313 | 0.180983440  | -0.139487827  | -4.068625363  |
| H314 | 6.269084867  | -11.879242598 | 5.704689716   |
| H315 | 4.707274884  | -12.164577858 | 5.304645351   |
| H316 | 5.508128637  | -3.366223156  | 2.046331590   |
| H317 | -0.699507832 | 2.025606349   | -4.825851501  |
| H318 | -3.399230401 | -2.102067420  | -5.452971734  |
| H319 | 7.662377802  | -9.930604199  | -1.675733374  |
| H320 | 6.643403975  | -7.653596670  | -3.754439599  |
| H321 | 6.640287947  | -8.166567991  | -0.115580813  |
| H322 | 6.795594483  | -10.536421437 | -2.814085557  |
| H323 | 4.885736085  | 2.581162378   | -9.577146634  |
| H324 | 6.362745695  | -5.024956919  | -0.209225831  |
| H325 | 2.315712790  | -7.675982708  | 0.835085409   |
| H326 | 3.250915177  | -1.987606735  | -7.698915030  |
| H327 | 3.087373756  | -9.170546663  | -0.816190873  |
| H328 | 3.115341572  | -7.038452509  | -7.050961201  |
| H329 | 2.274302528  | -5.500150278  | -5.219227196  |
| H330 | 6.570328471  | -12.454279157 | 3.460059692   |
| H331 | 5.781178789  | -1.108775449  | 2.035080097   |
| H332 | 8.352028106  | -5.809566913  | 0.806061452   |
| H333 | 7.242612923  | -3.755313857  | -0.088579911  |
| H334 | 8.980178487  | -6.870913764  | 2.792316458   |
| H335 | 3.607103369  | -2.769147716  | 5.114602434   |
| H336 | 3.786943860  | -8.279439717  | -3.663208972  |
| H337 | 5.003016486  | -8.581686238  | -2.416911047  |
| H338 | 1.944052033  | -8.665951589  | -2.068667862  |
| H339 | 1.326123288  | -2.136843761  | -6.201818374  |
| H340 | -2.921887967 | 2.153997205   | -5.985186238  |
| H341 | -5.092865615 | 0.985933056   | -6.573208504  |



|       |              |               |               |
|-------|--------------|---------------|---------------|
| H342  | 2.361290584  | -5.916491521  | 0.587747509   |
| H343  | 8.507461281  | -7.342970681  | 0.581302931   |
| H344  | 7.404657585  | -9.262363080  | 0.661097831   |
| H345  | 4.159028171  | -1.140336380  | 5.155840959   |
| H346  | 5.566112312  | -7.713081506  | -6.696808232  |
| H347  | 6.560076601  | -5.997450146  | -3.176527137  |
| H348  | 0.435535688  | -2.934604180  | -7.533665777  |
| H349  | 4.262164214  | 4.141886197   | -7.019192889  |
| H350  | 7.796292915  | 0.163340190   | 3.934643940   |
| H351  | 7.808755497  | 0.573498330   | 2.204361609   |
| H352  | 9.028661713  | -6.874325185  | -6.441712741  |
| H353  | 8.268553939  | -8.116777636  | -5.694492406  |
| H354  | 10.310853466 | -8.570227538  | -1.663495051  |
| H355  | 8.590512492  | -8.268535506  | -3.129077085  |
| H356  | 11.714887988 | -7.567598063  | -3.821081095  |
| H357  | 10.173897770 | -6.846761202  | -1.265117223  |
| H358  | 10.559628052 | 0.356757813   | 2.155153230   |
| H359  | -2.971684747 | 13.205216793  | 3.710429911   |
| H360  | 10.249216968 | -6.874307013  | 5.520459557   |
| H361  | 9.517894604  | -4.462399638  | 4.406429132   |
| H362  | -4.698684764 | 12.306214110  | 1.398528573   |
| H363  | -4.084998349 | 10.295742139  | 3.650915337   |
| H364  | -5.673594230 | 10.994038617  | 3.289752418   |
| H365  | 1.299281625  | -3.239025157  | -1.106444776  |
| H366  | 3.773686898  | -0.598893807  | 0.495073182   |
| H367  | -6.435478551 | 6.807671506   | -1.573477627  |
| H368  | 0.365651290  | -1.158637666  | -0.127454644  |
| H369  | -1.815261666 | -0.172757543  | -0.841833789  |
| Mo370 | 3.850926407  | -4.380930141  | -2.482142583  |
| N371  | -6.943616468 | -7.166131613  | -0.310304455  |
| N372  | -8.800559828 | -4.649778739  | 1.746900754   |
| N373  | -8.200777469 | -4.966296524  | 4.478170587   |
| N374  | -5.516509684 | -5.818111462  | 4.500574411   |
| N375  | -4.277232797 | -3.406017900  | 3.680306087   |
| N376  | -4.936280375 | -1.797013489  | 5.958770408   |
| N377  | -3.681408547 | -3.163455626  | 8.166173096   |
| N378  | -1.096377198 | -4.392096584  | 7.524846090   |
| N379  | 0.222573869  | -2.466059035  | 6.135274816   |
| N380  | -0.397424457 | 0.438455515   | 6.791722742   |
| N381  | -0.681937072 | 0.202758358   | 9.656955698   |
| N382  | 5.500478551  | -11.549938806 | 5.116306637   |
| N383  | 6.415495072  | -9.298836300  | 3.998495129   |
| N384  | 5.023518368  | -3.356354167  | 2.948128196   |
| N385  | 4.275903470  | -2.070832753  | 4.763402429   |
| N386  | 5.388952305  | -1.072988465  | 2.984982055   |
| N387  | 9.060836130  | -6.988004669  | 3.826775017   |
| N388  | -5.849448021 | -2.941456678  | -2.925237362  |
| N389  | -1.929109411 | -5.580158157  | -3.204372459  |
| N390  | -6.068419298 | -0.438760181  | -2.189932400  |
| N391  | -8.336336780 | 0.673709421   | -0.975890214  |
| N392  | -7.841417960 | 0.352778700   | 1.771854887   |
| N393  | -5.689413194 | 2.085093419   | 2.265432184   |
| N394  | -3.095632993 | 2.677628459   | -1.097425062  |
| N395  | -2.344706647 | 0.695610437   | -0.701739800  |
| N396  | -6.308896416 | 4.724211581   | 2.867955079   |
| N397  | -9.728323703 | 7.740099369   | 1.594110799   |
| N398  | -9.643011049 | 9.519124874   | 2.917538905   |
| N399  | 9.474791654  | 2.691832810   | 2.379575717   |
| N400  | 6.311598994  | 7.197468824   | -0.333983955  |
| N401  | 4.205804124  | 8.448553106   | -2.891969866  |
| N402  | 1.547599846  | 7.839623501   | -3.351464301  |
| N403  | -3.168662625 | 6.392112833   | -4.457865327  |
| N404  | -3.380757094 | 8.221108397   | -5.902930867  |
| N405  | -4.444913757 | 8.231686867   | -3.843411530  |
| N406  | 0.655830846  | 6.329657089   | -1.071777927  |
| N407  | 0.966932275  | 8.210710920   | 0.984365196   |
| N408  | -0.359971028 | 10.600405338  | 0.664805780   |
| N409  | -1.882909791 | 10.366157848  | -3.061922733  |
| N410  | -2.740652626 | 11.608100422  | 1.705938990   |
| N411  | 4.078200350  | -4.791553155  | -10.244813946 |
| N412  | 2.436099074  | -2.561409130  | -7.929734185  |
| N413  | 1.370874522  | 0.241392603   | -7.362210044  |
| N414  | 3.466264632  | 2.216424665   | -7.417667564  |
| N415  | -1.716625289 | -3.008056922  | -10.095884112 |
| N416  | -3.274146969 | -1.174546137  | -8.518748639  |
| N417  | 8.150871389  | -7.141526233  | -5.986803798  |
| N418  | 4.271291072  | -5.681739974  | -4.419914081  |
| N419  | 3.699224663  | -6.694493456  | -6.293282906  |
| N420  | 9.246139271  | -7.483845358  | -3.073751726  |
| N421  | 0.218474460  | 2.184143009   | 0.177677161   |

|      |              |               |              |
|------|--------------|---------------|--------------|
| N422 | 2.733142212  | -0.379292825  | 0.522615683  |
| N423 | 1.032800296  | 1.620117177   | -0.358424097 |
| N424 | 2.058649676  | -0.657245216  | 1.463815490  |
| O425 | -6.567030268 | -5.084925561  | 1.657354801  |
| O426 | -7.342743336 | -2.853310116  | 4.516972386  |
| O427 | -5.379737119 | -5.224538179  | 6.701282280  |
| O428 | -2.497255621 | -4.034382878  | 4.954034484  |
| O429 | -3.096861543 | -0.556982579  | 5.480673588  |
| O430 | -3.272868325 | -1.078220344  | 9.018336893  |
| O431 | -0.548918363 | -4.096306180  | 9.731890886  |
| O432 | 2.165813989  | -3.700956646  | 6.010562409  |
| O433 | 1.882633948  | 0.350993582   | 6.628635727  |
| O434 | 0.818125569  | 1.905081172   | 9.744624649  |
| O435 | 1.534259718  | -0.330987371  | 12.429988426 |
| O436 | 7.050965270  | -10.348913496 | 2.038362361  |
| O437 | 8.061720314  | -7.727453712  | 5.762039392  |
| O438 | 11.551909547 | -4.503739376  | 4.546019357  |
| O439 | -5.618347883 | -0.832280543  | 0.024242270  |
| O440 | -3.710804784 | -4.422567871  | -4.015993673 |
| O441 | -7.100492471 | 2.513463393   | -0.424452851 |
| O442 | -6.325895956 | 3.048112473   | -3.370966887 |
| O443 | -9.760143582 | 1.511910228   | 2.265053353  |
| O444 | -5.629292314 | 1.466426210   | 4.464750119  |
| O445 | -4.234528197 | 5.036009595   | 3.769415907  |
| O446 | -6.519854543 | 7.267893182   | 5.323405390  |
| O447 | 10.796472087 | -0.055483437  | 4.141707183  |
| O448 | 3.580758449  | 4.706361775   | 3.945751078  |
| O449 | 3.616174171  | 8.374829226   | -0.690282668 |
| O450 | 0.985006125  | 10.062629429  | -3.545684464 |
| O451 | -1.417890957 | 7.167090021   | -1.542194579 |
| O452 | -0.699035622 | 7.151864865   | 2.157363509  |
| O453 | 2.444351594  | 5.705379249   | 1.443234165  |
| O454 | 0.857953289  | 11.594185552  | 2.331877680  |
| O455 | -2.494249289 | 13.576982275  | 0.582594055  |
| O456 | -3.246625661 | 11.016451289  | -1.347434895 |
| O457 | -4.949285546 | 13.701117432  | 3.613348598  |
| O458 | -5.491354534 | 6.831178839   | -1.323892038 |
| O459 | 1.737068738  | -4.588252579  | -8.754495484 |
| O460 | -0.284053713 | -0.739947655  | -8.608470763 |
| O461 | 2.089574637  | 3.623851847   | -8.552732856 |
| O462 | 5.771364838  | 4.373488049   | -9.161039166 |
| O463 | -4.994164902 | -2.625923417  | -8.880747417 |
| O464 | -1.498658122 | -6.610423176  | -6.020998736 |
| O465 | 0.434499741  | -5.785800971  | -6.770802646 |
| O466 | -3.956454065 | 2.328740417   | -8.438635196 |
| O467 | 9.923773794  | -5.411329456  | -3.692189231 |
| O468 | 12.671192204 | -7.007670743  | -2.106950982 |
| O469 | 0.331746040  | -6.215678518  | -1.361075970 |
| O470 | -0.227099785 | -7.281838662  | 0.537281710  |
| O471 | 5.156746848  | -10.895990785 | -3.317721155 |
| O472 | 2.896069285  | -10.929773155 | -3.292709188 |
| O473 | 5.113158779  | -5.794138943  | -1.356313237 |
| O474 | 5.057466649  | -7.466757168  | 0.140673580  |
| O475 | 2.638049908  | -6.094365837  | -2.123467153 |
| O476 | 8.943818592  | -6.568012538  | 1.033892105  |
| O477 | 6.974183493  | -4.549412060  | 0.411043032  |
| O478 | -4.372405353 | 4.735710897   | -2.452549282 |
| O479 | 7.749233425  | -10.428240193 | -2.519463893 |
| O480 | 7.514633981  | -8.640228947  | -0.102410906 |
| S481 | 3.559655387  | 4.953450117   | -2.419070619 |
| S482 | 1.956683026  | 1.740094192   | -3.314387900 |
| S483 | 2.030819032  | -3.364581749  | -3.653779136 |
| S484 | 3.888700340  | 2.089514499   | -0.418613056 |
| S485 | 0.532818410  | -0.942405114  | -1.478012819 |
| S486 | 3.955720914  | -0.712691873  | -5.594986109 |
| S487 | 3.485449418  | -3.439312660  | -0.299348299 |
| S488 | 5.581733402  | 1.739680080   | -3.358019839 |
| S489 | 5.677364627  | -3.070909278  | -3.242103465 |
| S490 | 6.208138356  | -0.863012177  | -0.292984338 |
| end  |              |               |              |

## Fe2-NH-N-b to Fe2-NH-NH-b

Figure 8, scheme B

| reactant <b>Fe2-NH-N-b</b> (S=3/2)<br>Fe(139) 2.314 | bm52capexp347tb.car_5 |              |             |
|-----------------------------------------------------|-----------------------|--------------|-------------|
| C1                                                  | -7.724180018          | -5.349614055 | 1.284866943 |
| C2                                                  | -8.061496756          | -6.512273481 | 0.344053157 |

|          |        |     |               |               |              |
|----------|--------|-----|---------------|---------------|--------------|
| Fe( 140) | 0.042  | C3  | -8.634050408  | -3.468731807  | 2.579142324  |
| Fe( 141) | 2.653  | C4  | -8.002458282  | -3.737334638  | 3.943437791  |
| Fe( 142) | -2.372 | C5  | -7.587767472  | -5.344068582  | 5.741653737  |
| Fe( 143) | 2.260  | C6  | -6.060825446  | -5.452271775  | 5.687893874  |
| Fe( 144) | -2.021 | C7  | -4.074204184  | -5.762964302  | 4.304618258  |
| Fe( 145) | -0.659 | C8  | -3.535691684  | -4.330069349  | 4.343083075  |
|          |        | C9  | -3.937312198  | -1.992126992  | 3.717018757  |
|          |        | C10 | -3.951898394  | -1.382600844  | 5.126807943  |
|          |        | C11 | -4.974174016  | -1.255980752  | 7.306403565  |
|          |        | C12 | -3.884444920  | -1.820852897  | 8.230578943  |
|          |        | C13 | -2.868836363  | -3.849831165  | 9.161581496  |
|          |        | C14 | -1.393323641  | -4.107588242  | 8.826931540  |
|          |        | C15 | 0.260509713   | -4.694100355  | 7.098397003  |
|          |        | C16 | 0.978366115   | -3.559959133  | 6.363433512  |
|          |        | C17 | 0.632691007   | -1.295493495  | 5.371935641  |
|          |        | C18 | 0.765290541   | -0.087369627  | 6.315248101  |
|          |        | C19 | -0.290225475  | -1.078599381  | 4.153697696  |
|          |        | C20 | -0.032350895  | 0.283503882   | 3.501638103  |
|          |        | C21 | -0.160632649  | -2.257508526  | 3.179847263  |
|          |        | C22 | -0.390399132  | 1.620197875   | 7.654730609  |
|          |        | C23 | -0.030896397  | 1.259588126   | 9.107672701  |
|          |        | C24 | -1.727980871  | 2.387856579   | 7.528695986  |
|          |        | C25 | -1.805230421  | 3.546991079   | 8.527795325  |
|          |        | C26 | -1.919499736  | 2.902552610   | 6.095646913  |
|          |        | C27 | -0.428556040  | -0.145120423  | 11.042528553 |
|          |        | C28 | 1.038077392   | -0.414279161  | 11.316704697 |
|          |        | C29 | 5.877269858   | -11.629380356 | 3.698582984  |
|          |        | C30 | 6.517035774   | -10.352806735 | 3.166334420  |
|          |        | C31 | 6.819988458   | -7.939753753  | 3.686471575  |
|          |        | C32 | 8.044919616   | -7.546481806  | 4.531594386  |
|          |        | C33 | 5.639862978   | -6.985905087  | 3.932910217  |
|          |        | C34 | 5.962487472   | -5.542229945  | 3.557167043  |
|          |        | C35 | 4.706201681   | -4.676835921  | 3.495305263  |
|          |        | C36 | 4.879137557   | -2.178439242  | 3.561364969  |
|          |        | C37 | 10.287352239  | -6.554612949  | 4.464515963  |
|          |        | C38 | 10.464455155  | -5.052720967  | 4.465193604  |
|          |        | C39 | -5.323174963  | -2.667134607  | -1.582470885 |
|          |        | C40 | -5.686908388  | -1.232852814  | -1.153953357 |
|          |        | C41 | -3.786851704  | -2.813882132  | -1.518334165 |
|          |        | C42 | -3.237508423  | -4.250926121  | -1.632937418 |
|          |        | C43 | -2.974998797  | -4.747770235  | -3.055103102 |
|          |        | C44 | -6.163081392  | 1.005203858   | -2.066446631 |
|          |        | C45 | -7.248351554  | 1.469485294   | -1.084574951 |
|          |        | C46 | -6.342429635  | 1.610038194   | -3.464555483 |
|          |        | C47 | -9.406602355  | 0.966487876   | -0.037684665 |
|          |        | C48 | -9.010920785  | 0.969079433   | 1.442094187  |
|          |        | C49 | -7.315133196  | 0.419386030   | 3.122190302  |
|          |        | C50 | -6.137679100  | 1.370945040   | 3.344069943  |
|          |        | C51 | -4.598050910  | 3.036534683   | 2.428498151  |
|          |        | C52 | -5.031103164  | 4.347412679   | 3.125565911  |
|          |        | C53 | -4.010747075  | 3.470115711   | 1.077806370  |
|          |        | C54 | -3.372319424  | 2.413683173   | 0.238706809  |
|          |        | C55 | -2.886901179  | 1.153815722   | 0.484156099  |
|          |        | C56 | -2.470484968  | 1.630212896   | -1.651489384 |
|          |        | C57 | -6.822892407  | 6.033229638   | 3.246034207  |
|          |        | C58 | -6.703577589  | 6.202986006   | 4.759989505  |
|          |        | C59 | -8.306513989  | 6.093053895   | 2.808050020  |
|          |        | C60 | -8.920363294  | 7.457397202   | 2.684536313  |
|          |        | C61 | -8.859565792  | 8.557045734   | 3.518434636  |
|          |        | C62 | -10.148151266 | 8.987952115   | 1.768045432  |
|          |        | C63 | 9.251864290   | 1.659019264   | 3.394567439  |
|          |        | C64 | 10.291484072  | 0.567319136   | 3.219214232  |
|          |        | C65 | 7.862778823   | 0.996675284   | 3.220134494  |
|          |        | C66 | 6.721621873   | 1.961442135   | 3.437853147  |
|          |        | C67 | 6.136290533   | 2.135399815   | 4.704207250  |
|          |        | C68 | 6.221051190   | 2.730684709   | 2.371465162  |
|          |        | C69 | 5.086738916   | 3.041026477   | 4.903608565  |
|          |        | C70 | 5.192659533   | 3.653570240   | 2.559195817  |
|          |        | C71 | 4.619923535   | 3.802948942   | 3.824656500  |
|          |        | C72 | 5.381458306   | 6.858237216   | -1.422226678 |
|          |        | C73 | 4.321453820   | 7.953736912   | -1.623547039 |
|          |        | C74 | 4.719082063   | 5.519924247   | -1.095943640 |
|          |        | C75 | 3.302632048   | 9.536537814   | -3.223142492 |
|          |        | C76 | 1.827839516   | 9.159254050   | -3.386293970 |
|          |        | C77 | 0.207777970   | 7.259540437   | -3.338041765 |
|          |        | C78 | -0.257130194  | 6.914603914   | -1.898878536 |
|          |        | C79 | 0.243251972   | 6.014214887   | -4.253589271 |
|          |        | C80 | -1.006942260  | 5.132578666   | -4.366741801 |
|          |        | C81 | -2.153626873  | 5.674893345   | -5.236375669 |
|          |        | C82 | -3.681480430  | 7.585569226   | -4.753064205 |

|       |              |               |              |
|-------|--------------|---------------|--------------|
| C83   | 0.282167338  | 5.963309822   | 0.295858212  |
| C84   | 0.114969882  | 7.173591922   | 1.225198760  |
| C85   | 1.300345581  | 5.004530151   | 0.948876346  |
| C86   | 1.188419680  | 9.237833715   | 1.985246472  |
| C87   | 0.555837989  | 10.587469640  | 1.680129337  |
| C88   | -0.837761297 | 11.866720232  | 0.142595447  |
| C89   | -2.116067090 | 12.420397084  | 0.816600969  |
| C90   | -0.980962444 | 11.875849507  | -1.381735122 |
| C91   | -2.139513476 | 11.034744314  | -1.904286084 |
| C92   | -4.062818817 | 11.937505782  | 2.220944595  |
| C93   | -3.980866519 | 13.046887021  | 3.262488119  |
| C94   | -4.723523466 | 10.674793170  | 2.837776480  |
| C95   | -4.964822393 | 9.600849753   | 1.802349543  |
| C96   | -6.135581971 | 9.610969907   | 1.029511188  |
| C97   | -4.007223022 | 8.608090678   | 1.540999408  |
| C98   | -6.337626839 | 8.676329179   | 0.012849187  |
| C99   | -4.180920563 | 7.678143370   | 0.511302189  |
| C100  | -5.346592094 | 7.729637904   | -0.247205124 |
| C101  | 4.064598023  | -3.999528122  | -9.013637072 |
| C102  | 2.637675622  | -3.734931841  | -8.566118081 |
| C103  | 1.182093774  | -2.174972073  | -7.293639176 |
| C104  | 0.677607016  | -0.825394553  | -7.816066798 |
| C105  | 1.079023427  | 1.603120161   | -7.773262192 |
| C106  | 2.265892214  | 2.548100555   | -7.957019451 |
| C107  | 4.559677664  | 3.175396369   | -7.454468398 |
| C108  | 5.104927909  | 3.400557608   | -8.850927775 |
| C109  | -2.749343897 | -3.495595513  | -9.173289906 |
| C110  | -3.773181293 | -2.399052346  | -8.854466631 |
| C111  | -2.260076139 | -4.159554014  | -7.866109747 |
| C112  | -1.545927379 | -5.492421772  | -8.157216112 |
| C113  | -0.884351508 | -6.027256522  | -6.908010361 |
| C114  | -4.168746896 | -0.078779703  | -8.193522481 |
| C115  | -3.688554197 | 1.204830978   | -8.841018895 |
| C116  | -4.527901067 | 0.048769567   | -6.691986167 |
| C117  | -3.297572370 | 0.029494798   | -5.826768044 |
| C118  | -2.545332203 | 1.197987829   | -5.612858666 |
| C119  | -2.811372977 | -1.190441147  | -5.327730794 |
| C120  | -1.302226462 | 1.127171008   | -4.975290614 |
| C121  | -1.571979223 | -1.259985726  | -4.684666029 |
| C122  | -0.803104237 | -0.101879176  | -4.533643607 |
| C123  | 7.941604575  | -6.284139638  | -4.806600085 |
| C124  | 9.108697681  | -6.347370610  | -3.808669603 |
| C125  | 6.620939152  | -6.602068810  | -4.088768346 |
| C126  | 5.367395311  | -6.412033227  | -4.879362352 |
| C127  | 5.010603575  | -7.041252097  | -6.054447354 |
| C128  | 3.282863167  | -5.885918892  | -5.290574056 |
| C129  | 10.315296647 | -7.557204079  | -2.094985337 |
| C130  | 11.672617218 | -7.340719274  | -2.728106847 |
| C131  | 0.638048850  | -6.838003399  | -0.216319131 |
| C132  | 2.128479128  | -6.881116225  | 0.104937526  |
| C133  | 3.048848505  | -7.047228724  | -1.141314458 |
| C134  | 2.959990542  | -8.498952227  | -1.679388121 |
| C135  | 3.993474275  | -8.858138255  | -2.749658999 |
| C136  | 4.009136574  | -10.351599389 | -3.140978666 |
| C137  | 4.506202295  | -6.767546090  | -0.731646740 |
| C138  | 3.598246602  | -0.700290494  | -2.249825070 |
| Fe139 | 3.800698734  | -1.995141653  | -3.804567280 |
| Fe140 | 2.270308319  | 0.588063551   | -1.205745125 |
| Fe141 | 5.014529702  | 0.502319861   | -1.556712290 |
| Fe142 | 3.742100480  | 0.527610513   | -3.792508263 |
| Fe143 | 3.770709808  | 2.736796542   | -2.526360073 |
| Fe144 | 4.797827885  | -2.066564927  | -1.469364188 |
| Fe145 | 2.284667965  | -2.298559609  | -1.749772693 |
| H146  | -6.267072556 | -7.484894297  | 0.387307526  |
| H147  | -6.442058442 | -6.501478267  | -0.903854080 |
| H148  | -9.719580656 | -4.845026279  | 1.357066200  |
| H149  | -8.774871862 | -6.157072897  | -0.417190128 |
| H150  | -8.609377935 | -7.255572150  | 0.948892518  |
| H151  | -7.997328438 | -2.722111459  | 2.082250504  |
| H152  | -8.760831138 | -5.641035483  | 3.962828148  |
| H153  | -9.621969408 | -3.015607052  | 2.739010575  |
| H154  | -8.002714793 | -6.310728396  | 6.055553435  |
| H155  | -6.109999172 | -5.886363896  | 3.673058335  |
| H156  | -7.820844560 | -4.605388180  | 6.519509770  |
| H157  | -2.932990814 | -1.826325840  | 3.307860565  |
| H158  | -5.098395207 | -3.703979505  | 3.156626257  |
| H159  | -3.835676483 | -6.221665608  | 3.335503101  |
| H160  | -4.835147700 | -0.167167097  | 7.279481928  |
| H161  | -5.719946220 | -2.343973695  | 5.594083503  |
| H162  | -3.561087430 | -6.327757091  | 5.091977476  |

|      |               |              |               |
|------|---------------|--------------|---------------|
| H163 | -4.656819629  | -1.458185893 | 3.080975746   |
| H164 | -4.273508582  | -3.728587475 | 7.551243995   |
| H165 | -5.956254605  | -1.477848443 | 7.746724644   |
| H166 | -0.472219919  | -3.197453172 | 3.657464322   |
| H167 | -0.811475997  | -2.105381983 | 2.303899090   |
| H168 | 0.866236584   | -2.362828097 | 2.805898605   |
| H169 | -1.320788080  | -1.066674689 | 4.534710770   |
| H170 | -3.331427479  | -4.826582509 | 9.367519002   |
| H171 | -1.944296414  | 2.086453028  | 5.361575658   |
| H172 | -1.461989723  | -0.254996014 | 9.179598577   |
| H173 | -1.760939149  | 3.205186674  | 9.571577471   |
| H174 | 0.997016148   | 0.365191348  | 3.136282399   |
| H175 | -0.226198928  | 1.110750089  | 4.199820887   |
| H176 | 9.326798178   | 2.020936543  | 4.437633315   |
| H177 | -2.869250550  | 3.448981416  | 6.008628940   |
| H178 | -2.751051372  | 4.090624778  | 8.387754656   |
| H179 | -1.103810221  | 3.591678837  | 5.821472832   |
| H180 | -0.977643669  | 4.256207982  | 8.367198187   |
| H181 | -2.544423950  | 1.678460382  | 7.756807712   |
| H182 | 0.431007942   | 2.273678813  | 7.323629025   |
| H183 | -1.292950669  | 0.111144513  | 6.421952922   |
| H184 | -0.688798599  | 0.416684967  | 2.628065248   |
| H185 | 1.612744004   | 4.258257445  | 0.203128084   |
| H186 | 0.778661384   | 4.484891723  | 1.764759137   |
| H187 | 2.685746035   | 5.327717631  | 2.313560397   |
| H188 | 3.230626090   | 4.685725598  | 4.855391755   |
| H189 | 4.807735578   | 4.233681580  | 1.720351692   |
| H190 | 6.625961550   | 2.587564810  | 1.367015643   |
| H191 | 6.495696076   | 1.545305032  | 5.552426692   |
| H192 | -0.750180587  | -2.519094051 | 6.431859590   |
| H193 | 0.259672679   | -5.565658168 | 6.427041084   |
| H194 | 0.856775351   | -4.950784938 | 7.983666929   |
| H195 | -1.834016786  | -4.427424424 | 6.813544258   |
| H196 | -2.871853395  | -3.263312924 | 10.088190631  |
| H197 | 4.630161683   | 3.148116824  | 5.891440449   |
| H198 | 1.651152747   | -1.494028118 | 5.017407634   |
| H199 | -0.780426277  | 0.628899328  | 11.743081630  |
| H200 | -0.976263927  | -1.075076990 | 11.259716570  |
| H201 | 1.632881478   | -0.753994355 | 10.436719006  |
| H202 | 11.169072068  | -7.023518358 | 4.001319964   |
| H203 | -1.738143005  | -5.970428531 | -4.133711102  |
| H204 | 1.290535217   | -6.024094292 | -1.842314476  |
| H205 | -2.287923757  | -6.232158726 | -8.489812692  |
| H206 | -0.804686780  | -5.357841633 | -8.957895003  |
| H207 | -3.111558372  | -4.348995168 | -7.194271518  |
| H208 | -3.093496906  | 1.052702930  | -9.772270437  |
| H209 | -3.342476107  | -4.246019616 | -9.718621303  |
| H210 | -3.340903631  | -2.182539913 | -2.305037049  |
| H211 | -3.940759599  | -4.963242852 | -1.168125039  |
| H212 | -2.260811324  | -1.025695743 | -8.472839470  |
| H213 | -5.113861385  | -0.308892953 | -8.728066536  |
| H214 | -1.032887098  | -2.410714969 | -9.616017231  |
| H215 | -1.281835391  | -5.805357104 | -2.441109884  |
| H216 | -1.593826401  | -3.461390125 | -7.335927271  |
| H217 | -1.200476615  | -3.798613292 | -10.487000969 |
| H218 | -6.739451969  | -3.441256086 | -2.871924365  |
| H219 | -3.464928146  | -2.407051761 | -0.548144490  |
| H220 | 0.815059388   | -5.305504799 | -7.569053668  |
| H221 | -2.309658425  | -4.326799720 | -1.048357930  |
| H222 | -3.829969480  | 2.588686043  | 3.074913069   |
| H223 | -2.903276080  | 0.547969867  | 1.381425680   |
| H224 | -8.127754136  | 0.756759501  | 3.780513838   |
| H225 | -7.254774677  | -0.070722364 | 1.044836637   |
| H226 | -6.923028712  | 4.077052901  | 2.379913302   |
| H227 | -8.332665918  | 8.739685469  | 4.447755656   |
| H228 | -6.850659339  | 5.253250810  | 5.331188176   |
| H229 | -8.905282734  | 5.451991153  | 3.479399930   |
| H230 | -6.245261250  | 6.831688224  | 2.754419146   |
| H231 | -10.805930261 | 9.543366537  | 1.105289950   |
| H232 | -3.256790149  | 4.244901293  | 1.291434523   |
| H233 | -4.804623394  | 3.954907450  | 0.486723923   |
| H234 | -9.810699234  | 10.456657272 | 3.273360303   |
| H235 | -8.371238206  | 5.637144972  | 1.807223417   |
| H236 | -6.168430660  | 2.018661933  | 1.362787835   |
| H237 | -7.014849560  | -0.577822862 | 3.476671182   |
| H238 | -9.835553724  | 1.958183836  | -0.239794880  |
| H239 | -2.123893460  | 1.538020350  | -2.678207689  |
| H240 | -10.201871041 | 0.223322280  | -0.180708420  |
| H241 | 10.287307365  | 3.256333891  | 2.639564701   |
| H242 | 8.678721352   | 3.335362562  | 2.369023305   |

|      |              |               |               |
|------|--------------|---------------|---------------|
| H243 | 1.553734162  | 5.983421905   | -1.442263800  |
| H244 | -0.695559228 | 5.460288118   | 0.268561757   |
| H245 | 1.728578001  | 8.056171794   | 0.317845386   |
| H246 | -3.439564936 | 3.529428591   | -1.611839287  |
| H247 | -5.106438605 | 4.156833749   | -2.795381765  |
| H248 | -6.683907439 | 3.393078766   | -4.208395565  |
| H249 | -4.789989111 | 5.399057141   | -1.848448928  |
| H250 | -5.516304328 | 1.252520294   | -4.101090358  |
| H251 | -7.296768113 | 1.276143942   | -3.900684484  |
| H252 | -0.027537246 | 11.584107231  | -1.844370919  |
| H253 | -1.186274750 | 12.916133514  | -1.679348939  |
| H254 | -0.910301584 | 10.209482730  | -3.354601201  |
| H255 | -2.600278280 | 9.702553078   | -3.347538951  |
| H256 | -3.764795143 | 9.144535071   | -6.078943800  |
| H257 | -2.651536299 | 4.846262934   | -5.762750893  |
| H258 | -7.260098965 | 8.689260403   | -0.573547841  |
| H259 | -3.101493980 | 8.537862871   | 2.148710481   |
| H260 | -4.660540313 | 7.780891067   | -2.950685673  |
| H261 | 1.065266710  | 5.372464270   | -3.897971100  |
| H262 | 2.336006275  | 7.194304914   | -3.239477829  |
| H263 | -1.389352408 | 4.857958044   | -3.371329524  |
| H264 | -8.352345930 | -0.196250265  | -1.503742145  |
| H265 | 3.635533914  | 10.004019094  | -4.159369495  |
| H266 | -6.077296708 | -0.949255157  | -3.089163081  |
| H267 | 0.536641683  | 6.354484347   | -5.260174442  |
| H268 | -3.396445395 | 6.954170810   | 0.287728945   |
| H269 | 3.335405310  | 10.302569203  | -2.434693821  |
| H270 | -3.064465022 | 7.698807486   | -6.713159480  |
| H271 | -5.109755078 | 8.928665750   | -4.167793352  |
| H272 | -5.172261291 | -3.529154399  | -3.446380045  |
| H273 | -5.756432449 | -3.325240459  | -0.806234967  |
| H274 | -6.908219881 | 10.358499424  | 1.223730096   |
| H275 | -5.229932212 | 1.392397601   | -1.631733841  |
| H276 | -0.495144620 | 8.011355893   | -3.710731065  |
| H277 | -1.739273876 | 6.341550090   | -6.003267767  |
| H278 | -0.673684292 | 4.195522412   | -4.835734731  |
| H279 | -3.586327351 | 5.865738955   | -3.669241245  |
| H280 | 0.787360887  | 8.893576077   | 2.950248285   |
| H281 | -0.456053623 | 9.748820788   | 0.112713598   |
| H282 | -0.070135321 | 12.612250487  | 0.402015898   |
| H283 | 2.266579473  | 9.409995076   | 2.103937972   |
| H284 | -2.433971779 | 10.638927592  | 1.732943289   |
| H285 | 4.588765381  | -3.046923472  | -9.178536137  |
| H286 | 4.556946358  | -4.489430222  | -8.146199942  |
| H287 | 7.921345886  | -5.240731579  | -5.154522024  |
| H288 | 5.027287616  | -5.138000478  | -10.402546370 |
| H289 | 3.490390117  | -5.618221265  | -10.104298791 |
| H290 | 5.505499952  | 4.767922855   | -0.960903413  |
| H291 | 5.765253518  | 7.440051744   | 0.498740888   |
| H292 | 4.823592723  | 8.089087086   | -3.615218173  |
| H293 | 4.139492568  | 5.607618688   | -0.167650761  |
| H294 | 6.835976804  | 8.041174773   | -0.581973934  |
| H295 | 5.383793674  | 2.771984881   | -6.844625471  |
| H296 | 5.971414226  | 6.746971253   | -2.344888538  |
| H297 | 5.337157755  | -7.056065895  | 4.990971532   |
| H298 | 7.082270326  | -7.919761933  | 2.620754641   |
| H299 | 3.607031562  | 1.350183250   | -6.889190445  |
| H300 | 5.112732987  | -0.155865497  | 3.323397660   |
| H301 | 0.538397786  | 1.565804614   | -8.727154059  |
| H302 | -1.196673032 | -2.218683767  | -4.319325409  |
| H303 | 0.409410479  | 2.091166448   | -7.044033384  |
| H304 | 4.255933564  | -4.566528981  | 4.488768943   |
| H305 | 2.061210514  | 0.057293096   | -6.613892378  |
| H306 | 3.950389700  | -5.146230418  | 2.845518517   |
| H307 | 4.799716636  | -7.350328687  | 3.319971481   |
| H308 | 6.444395787  | -5.520703190  | 2.568713837   |
| H309 | 6.670396196  | -5.097062415  | 4.273885459   |
| H310 | -5.192441582 | -0.789316310  | -6.436985250  |
| H311 | 5.949416410  | -9.506899799  | 4.887928553   |
| H312 | 4.973821061  | -11.790568523 | 3.091498322   |
| H313 | 0.180983440  | -0.139487827  | -4.068625363  |
| H314 | 6.269084867  | -11.879242598 | 5.704689716   |
| H315 | 4.707274884  | -12.164577858 | 5.304645351   |
| H316 | 5.508128637  | -3.366223156  | 2.046331590   |
| H317 | -0.699507832 | 2.025606349   | -4.825851501  |
| H318 | -3.399230401 | -2.102067420  | -5.452971734  |
| H319 | 7.662377802  | -9.930604199  | -1.675733374  |
| H320 | 6.643403975  | -7.653596670  | -3.754439599  |
| H321 | 6.640287947  | -8.166567991  | -0.115580813  |
| H322 | 6.795594483  | -10.536421437 | -2.814085557  |

|       |              |               |              |
|-------|--------------|---------------|--------------|
| H323  | 4.885736085  | 2.581162378   | -9.577146634 |
| H324  | 6.362745695  | -5.024956919  | -0.209225831 |
| H325  | 2.315712790  | -7.675982708  | 0.835085409  |
| H326  | 3.250915177  | -1.987606735  | -7.698915030 |
| H327  | 3.087373756  | -9.170546663  | -0.816190873 |
| H328  | 3.115341572  | -7.038452509  | -7.050961201 |
| H329  | 2.274302528  | -5.500150278  | -5.219227196 |
| H330  | 6.570328471  | -12.454279157 | 3.460059692  |
| H331  | 5.781178789  | -1.108775449  | 2.035080097  |
| H332  | 8.352028106  | -5.809566913  | 0.806061452  |
| H333  | 7.242612923  | -3.755313857  | -0.088579911 |
| H334  | 8.980178487  | -6.870913764  | 2.792316458  |
| H335  | 3.607103369  | -2.769147716  | 5.114602434  |
| H336  | 3.786943860  | -8.279439717  | -3.663208972 |
| H337  | 5.003016486  | -8.581686238  | -2.416911047 |
| H338  | 1.944052033  | -8.665951589  | -2.068667862 |
| H339  | 1.326123288  | -2.136843761  | -6.201818374 |
| H340  | -2.921887967 | 2.153997205   | -5.985186238 |
| H341  | -5.092865615 | 0.985933056   | -6.573208504 |
| H342  | 2.361290584  | -5.916491521  | 0.587747509  |
| H343  | 8.507461281  | -7.342970681  | 0.581302931  |
| H344  | 7.404657585  | -9.262363080  | 0.661097831  |
| H345  | 4.159028171  | -1.140336380  | 5.155840959  |
| H346  | 5.566112312  | -7.713081506  | -6.696808232 |
| H347  | 6.560076601  | -5.997450146  | -3.176527137 |
| H348  | 0.435535688  | -2.934604180  | -7.533665777 |
| H349  | 4.262164214  | 4.141886197   | -7.019192889 |
| H350  | 7.796292915  | 0.163340190   | 3.934643940  |
| H351  | 7.808755497  | 0.573498330   | 2.204361609  |
| H352  | 9.028661713  | -6.874325185  | -6.441712741 |
| H353  | 8.268553939  | -8.116777636  | -5.694492406 |
| H354  | 10.310853466 | -8.570227538  | -1.663495051 |
| H355  | 8.590512492  | -8.268535506  | -3.129077085 |
| H356  | 11.714887988 | -7.567598063  | -3.821081095 |
| H357  | 10.173897770 | -6.846761202  | -1.265117223 |
| H358  | 10.559628052 | 0.356757813   | 2.155153230  |
| H359  | -2.971684747 | 13.205216793  | 3.710429911  |
| H360  | 10.249216968 | -6.874307013  | 5.520459557  |
| H361  | 9.517894604  | -4.462399638  | 4.406429132  |
| H362  | -4.698684764 | 12.306214110  | 1.398528573  |
| H363  | -4.084998349 | 10.295742139  | 3.650915337  |
| H364  | 5.673594230  | 10.994038617  | 3.289752418  |
| H365  | 1.299281625  | -3.239025157  | -1.106444776 |
| H366  | 3.773686898  | -0.598893807  | 0.495073182  |
| H367  | -6.435478551 | 6.807671506   | -1.573477627 |
| H368  | 0.365651290  | -1.158637666  | -0.127454644 |
| H369  | -1.815261666 | -0.172757543  | -0.841833789 |
| Mo370 | 3.850926407  | -4.380930141  | -2.482142583 |
| N371  | -6.943616468 | -7.166131613  | -0.310304455 |
| N372  | -8.800559828 | -4.649778739  | 1.746900754  |
| N373  | -8.200777469 | -4.966296524  | 4.478170587  |
| N374  | -5.516509684 | -5.818111462  | 4.500574411  |
| N375  | -4.277232797 | -3.406017900  | 3.680306087  |
| N376  | -4.936280375 | -1.797013489  | 5.958770408  |
| N377  | -3.681408547 | -3.163455626  | 8.166173096  |
| N378  | -1.096377198 | -4.392096584  | 7.524846090  |
| N379  | 0.222573869  | -2.466059035  | 6.135274816  |
| N380  | -0.397424457 | 0.438455515   | 6.791722742  |
| N381  | -0.681937072 | 0.202758358   | 9.656955698  |
| N382  | 5.500478551  | -11.549938806 | 5.116306637  |
| N383  | 6.415495072  | -9.298836300  | 3.998495129  |
| N384  | 5.023518368  | -3.356354167  | 2.948128196  |
| N385  | 4.275903470  | -2.070832753  | 4.763402429  |
| N386  | 5.388952305  | -1.072988465  | 2.984982055  |
| N387  | 9.060836130  | -6.988004669  | 3.826775017  |
| N388  | -5.849448021 | -2.941456678  | -2.925237362 |
| N389  | -1.929109411 | -5.580158157  | -3.204372459 |
| N390  | -6.068419298 | -0.438760181  | -2.189932400 |
| N391  | -8.336336780 | 0.673709421   | -0.975890214 |
| N392  | -7.841417960 | 0.352778700   | 1.771854887  |
| N393  | -5.689413194 | 2.085093419   | 2.265432184  |
| N394  | -3.095632993 | 2.677628459   | -1.097425062 |
| N395  | -2.344706647 | 0.695610437   | -0.701739800 |
| N396  | -6.308896416 | 4.724211581   | 2.867955079  |
| N397  | -9.728323703 | 7.740099369   | 1.594110799  |
| N398  | -9.643011049 | 9.519124874   | 2.917538905  |
| N399  | 9.474791654  | 2.691832810   | 2.379575717  |
| N400  | 6.311598994  | 7.197468824   | -0.333983955 |
| N401  | 4.205804124  | 8.448553106   | -2.891969866 |
| N402  | 1.547599846  | 7.839623501   | -3.351464301 |

|      |              |               |               |
|------|--------------|---------------|---------------|
| N403 | -3.168662625 | 6.392112833   | -4.457865327  |
| N404 | -3.380757094 | 8.221108397   | -5.902930867  |
| N405 | -4.444913757 | 8.231686867   | -3.843411530  |
| N406 | 0.655830846  | 6.329657089   | -1.071777927  |
| N407 | 0.966932275  | 8.210710920   | 0.984365196   |
| N408 | -0.359971028 | 10.600405338  | 0.664805780   |
| N409 | -1.882909791 | 10.366157848  | -3.061922733  |
| N410 | -2.740652626 | 11.608100422  | 1.705938990   |
| N411 | 4.078200350  | -4.791553155  | -10.244813946 |
| N412 | 2.436099074  | -2.561409130  | -7.929734185  |
| N413 | 1.370874522  | 0.241392603   | -7.362210044  |
| N414 | 3.466264632  | 2.216424665   | -7.417667564  |
| N415 | -1.716625289 | -3.008056922  | -10.095884112 |
| N416 | -3.274146969 | -1.174546137  | -8.518748639  |
| N417 | 8.150871389  | -7.141526233  | -5.986803798  |
| N418 | 4.271291072  | -5.681739974  | -4.419914081  |
| N419 | 3.699224663  | -6.694493456  | -6.293282906  |
| N420 | 9.246139271  | -7.483845358  | -3.073751726  |
| N421 | 0.218474460  | 2.184143009   | 0.177677161   |
| N422 | 2.733142212  | -0.379292825  | 0.522615683   |
| N423 | 1.032800296  | 1.620117177   | -0.358424097  |
| N424 | 2.058649676  | -0.657245216  | 1.463815490   |
| O425 | -6.567030268 | -5.084925561  | 1.657354801   |
| O426 | -7.342743336 | -2.853310116  | 4.516972386   |
| O427 | -5.379737119 | -5.224538179  | 6.701282280   |
| O428 | -2.497255621 | -4.034382878  | 4.954034484   |
| O429 | -3.096861543 | -0.556982579  | 5.480673588   |
| O430 | -3.272868325 | -1.078220344  | 9.018336893   |
| O431 | -0.548918363 | -4.096306180  | 9.731890886   |
| O432 | 2.165813989  | -3.700956646  | 6.010562409   |
| O433 | 1.882633948  | 0.350993582   | 6.628635727   |
| O434 | 0.818125569  | 1.905081172   | 9.744624649   |
| O435 | 1.534259718  | -0.330987371  | 12.429988426  |
| O436 | 7.050965270  | -10.348913496 | 2.038362361   |
| O437 | 8.061720314  | -7.727453712  | 5.762039392   |
| O438 | 11.551909547 | -4.503739376  | 4.546019357   |
| O439 | -5.618347883 | -0.832280543  | 0.024242270   |
| O440 | -3.710804784 | -4.422567871  | -4.015993673  |
| O441 | -7.100492471 | 2.513463393   | -0.424452851  |
| O442 | -6.325895956 | 3.048112473   | -3.370966887  |
| O443 | -9.760143582 | 1.511910228   | 2.265053353   |
| O444 | -5.629292314 | 1.466426210   | 4.464750119   |
| O445 | -4.234528197 | 5.036009595   | 3.769415907   |
| O446 | -6.519854543 | 7.267893182   | 5.323405390   |
| O447 | 10.796472087 | -0.055483437  | 4.141707183   |
| O448 | 3.580758449  | 4.706361775   | 3.945751078   |
| O449 | 3.616174171  | 8.374829226   | -0.690282668  |
| O450 | 0.985006125  | 10.062629429  | -3.545684464  |
| O451 | -1.417890957 | 7.167090021   | -1.542194579  |
| O452 | -0.699035622 | 7.151864865   | 2.157363509   |
| O453 | 2.444351594  | 5.705379249   | 1.443234165   |
| O454 | 0.857953289  | 11.594185552  | 2.331877680   |
| O455 | -2.494249289 | 13.576982275  | 0.582594055   |
| O456 | -3.246625661 | 11.016451289  | -1.347434895  |
| O457 | -4.949285546 | 13.701117432  | 3.613348598   |
| O458 | -5.491354534 | 6.831178839   | -1.323892038  |
| O459 | 1.737068738  | -4.588252579  | -8.754495484  |
| O460 | -0.284053713 | -0.739947655  | -8.608470763  |
| O461 | 2.089574637  | 3.623851847   | -8.552732856  |
| O462 | 5.771364838  | 4.373488049   | -9.161039166  |
| O463 | -4.994164902 | -2.625923417  | -8.880747417  |
| O464 | -1.498658122 | -6.610423176  | -6.020998736  |
| O465 | 0.434499741  | -5.785800971  | -6.770802646  |
| O466 | -3.956454065 | 2.328740417   | -8.438635196  |
| O467 | 9.923773794  | -5.411329456  | -3.692189231  |
| O468 | 12.671192204 | -7.007670743  | -2.106950982  |
| O469 | 0.331746040  | -6.215678518  | -1.361075970  |
| O470 | -0.227099785 | -7.281838662  | 0.537281710   |
| O471 | 5.156746848  | -10.895990785 | -3.317721155  |
| O472 | 2.896069285  | -10.929773155 | -3.292709188  |
| O473 | 5.113158779  | -5.794138943  | -1.356313237  |
| O474 | 5.057466649  | -7.466757168  | 0.140673580   |
| O475 | 2.638049908  | -6.094365837  | -2.123467153  |
| O476 | 8.943818592  | -6.568012538  | 1.033892105   |
| O477 | 6.974183493  | -4.549412060  | 0.411043032   |
| O478 | -4.372405353 | 4.735710897   | -2.452549282  |
| O479 | 7.749233425  | -10.428240193 | -2.519463893  |
| O480 | 7.514633981  | -8.640228947  | -0.102410906  |
| S481 | 3.559655387  | 4.953450117   | -2.419070619  |
| S482 | 1.956683026  | 1.740094192   | -3.314387900  |



|                                 |                                   |               |               |              |
|---------------------------------|-----------------------------------|---------------|---------------|--------------|
|                                 | S483                              | 2.030819032   | -3.364581749  | -3.653779136 |
|                                 | S484                              | 3.888700340   | 2.089514499   | -0.418613056 |
|                                 | S485                              | 0.532818410   | -0.942405114  | -1.478012819 |
|                                 | S486                              | 3.955720914   | -0.712691873  | -5.594986109 |
|                                 | S487                              | 3.485449418   | -3.439312660  | -0.299348299 |
|                                 | S488                              | 5.581733402   | 1.739680080   | -3.358019839 |
|                                 | S489                              | 5.677364627   | -3.070909278  | -3.242103465 |
|                                 | S490                              | 6.208138356   | -0.863012177  | -0.292984338 |
|                                 | end                               |               |               |              |
| <b>transition state (S=3/2)</b> | <b>bm52exp347nnhtonhntg.car 1</b> |               |               |              |
|                                 | C1                                | -7.722453428  | -5.348611426  | 1.286579128  |
|                                 | C2                                | -8.055095956  | -6.511247758  | 0.343977766  |
|                                 | C3                                | -8.638537529  | -3.470284755  | 2.579761157  |
|                                 | C4                                | -8.008342463  | -3.738509538  | 3.944716018  |
|                                 | C5                                | -7.596452165  | -5.346240200  | 5.742817008  |
|                                 | C6                                | -6.069682163  | -5.457518546  | 5.690893966  |
|                                 | C7                                | -4.081910161  | -5.765460127  | 4.309076021  |
|                                 | C8                                | -3.541855302  | -4.333336914  | 4.350042685  |
|                                 | C9                                | -3.940150004  | -1.994903075  | 3.725464414  |
|                                 | C10                               | -3.953535390  | -1.389391285  | 5.136965253  |
|                                 | C11                               | -4.976415043  | -1.261471019  | 7.316891588  |
|                                 | C12                               | -3.888161217  | -1.829987391  | 8.240813530  |
|                                 | C13                               | -2.872843213  | -3.861644801  | 9.165366068  |
|                                 | C14                               | -1.395966156  | -4.112114941  | 8.829166601  |
|                                 | C15                               | 0.257900675   | -4.686751250  | 7.095902213  |
|                                 | C16                               | 0.977748286   | -3.555153446  | 6.358170720  |
|                                 | C17                               | 0.635925071   | -1.286564638  | 5.369273602  |
|                                 | C18                               | 0.765081043   | -0.078923569  | 6.314517097  |
|                                 | C19                               | -0.282475641  | -1.071242803  | 4.148699392  |
|                                 | C20                               | -0.007116868  | 0.280039590   | 3.480547271  |
|                                 | C21                               | -0.164636544  | -2.259352248  | 3.186249755  |
|                                 | C22                               | -0.396611997  | 1.624140089   | 7.654542223  |
|                                 | C23                               | -0.037450284  | 1.260787729   | 9.106438370  |
|                                 | C24                               | -1.734345895  | 2.391742930   | 7.531559796  |
|                                 | C25                               | -1.808666363  | 3.550105775   | 8.532304678  |
|                                 | C26                               | -1.928576132  | 2.909669170   | 6.100019543  |
|                                 | C27                               | -0.432937511  | -0.149647296  | 11.036641522 |
|                                 | C28                               | 1.033619399   | -0.416510402  | 11.311334428 |
|                                 | C29                               | 5.876786247   | -11.631946851 | 3.693545882  |
|                                 | C30                               | 6.517408109   | -10.354588769 | 3.163069149  |
|                                 | C31                               | 6.820903263   | -7.941878168  | 3.685188151  |
|                                 | C32                               | 8.046284432   | -7.548558844  | 4.529716280  |
|                                 | C33                               | 5.640963094   | -6.987912108  | 3.932629247  |
|                                 | C34                               | 5.963071496   | -5.543972267  | 3.557768438  |
|                                 | C35                               | 4.706801776   | -4.678595323  | 3.498324263  |
|                                 | C36                               | 4.878640226   | -2.180369271  | 3.555304919  |
|                                 | C37                               | 10.287335139  | -6.553687994  | 4.463633332  |
|                                 | C38                               | 10.462649597  | -5.051625362  | 4.465536602  |
|                                 | C39                               | -5.322775125  | -2.665394802  | -1.584382878 |
|                                 | C40                               | -5.686704468  | -1.230828883  | -1.156413733 |
|                                 | C41                               | -3.786453949  | -2.811700157  | -1.519953408 |
|                                 | C42                               | -3.236950221  | -4.248648825  | -1.633443731 |
|                                 | C43                               | -2.975386753  | -4.746714050  | -3.055284810 |
|                                 | C44                               | -6.160845713  | 1.007029605   | -2.069886623 |
|                                 | C45                               | -7.245996417  | 1.472002116   | -1.087813548 |
|                                 | C46                               | -6.339237016  | 1.611986261   | -3.467870687 |
|                                 | C47                               | -9.405054992  | 0.969902034   | -0.042105448 |
|                                 | C48                               | -9.010069357  | 0.971088952   | 1.437777945  |
|                                 | C49                               | -7.314136556  | 0.417952769   | 3.117224268  |
|                                 | C50                               | -6.133434749  | 1.364466459   | 3.339136934  |
|                                 | C51                               | -4.597086961  | 3.034642476   | 2.427114312  |
|                                 | C52                               | -5.029744363  | 4.345226143   | 3.124725786  |
|                                 | C53                               | -4.008129308  | 3.469500943   | 1.077390420  |
|                                 | C54                               | -3.364561292  | 2.414994538   | 0.240297865  |
|                                 | C55                               | -2.877795719  | 1.155963644   | 0.487445700  |
|                                 | C56                               | -2.462376857  | 1.629153407   | -1.647530815 |
|                                 | C57                               | -6.819088422  | 6.033006101   | 3.244923021  |
|                                 | C58                               | -6.699011205  | 6.203950534   | 4.758426583  |
|                                 | C59                               | -8.303602667  | 6.094781692   | 2.811142103  |
|                                 | C60                               | -8.916274347  | 7.459502253   | 2.687341383  |
|                                 | C61                               | -8.857543265  | 8.558863693   | 3.521849788  |
|                                 | C62                               | -10.142043569 | 8.990276523   | 1.768623387  |
|                                 | C63                               | 9.251233246   | 1.660306512   | 3.390527945  |
|                                 | C64                               | 10.294414927  | 0.571894512   | 3.215196281  |
|                                 | C65                               | 7.862521528   | 0.997465083   | 3.215875852  |
|                                 | C66                               | 6.721587053   | 1.962640103   | 3.434541103  |
|                                 | C67                               | 6.135580349   | 2.136070316   | 4.700759067  |
|                                 | C68                               | 6.222186235   | 2.733524996   | 2.368821939  |
|                                 | C69                               | 5.086890056   | 3.042584843   | 4.900759011  |
|                                 | C70                               | 5.194586289   | 3.657219475   | 2.556974123  |

|       |              |               |              |
|-------|--------------|---------------|--------------|
| C71   | 4.621387574  | 3.805960855   | 3.822306763  |
| C72   | 5.381108655  | 6.856606889   | -1.425988348 |
| C73   | 4.319677217  | 7.951478770   | -1.626400631 |
| C74   | 4.722379090  | 5.519576777   | -1.089177339 |
| C75   | 3.301079167  | 9.535554789   | -3.225484015 |
| C76   | 1.825907286  | 9.158850909   | -3.388941999 |
| C77   | 0.207421519  | 7.257442927   | -3.339669075 |
| C78   | -0.257025470 | 6.913331499   | -1.900356792 |
| C79   | 0.243447826  | 6.012755125   | -4.255647703 |
| C80   | -1.006610361 | 5.131350209   | -4.369056682 |
| C81   | -2.153384534 | 5.674364055   | -5.237840971 |
| C82   | -3.681545084 | 7.583857841   | -4.753702194 |
| C83   | 0.282465632  | 5.963646939   | 0.294503045  |
| C84   | 0.114577640  | 7.172767042   | 1.225051748  |
| C85   | 1.301709047  | 5.005360651   | 0.946366267  |
| C86   | 1.187854150  | 9.236044130   | 1.987180734  |
| C87   | 0.555799619  | 10.585467010  | 1.680638728  |
| C88   | -0.835720959 | 11.864522735  | 0.141767932  |
| C89   | -2.113288396 | 12.418012996  | 0.816478062  |
| C90   | -0.979839075 | 11.875789512  | -1.382333445 |
| C91   | -2.139522593 | 11.036964739  | -1.905719328 |
| C92   | -4.059984479 | 11.935612355  | 2.219720533  |
| C93   | -3.979215754 | 13.045816801  | 3.259840486  |
| C94   | -4.722688498 | 10.674480106  | 2.837860375  |
| C95   | -4.964265051 | 9.600769379   | 1.802550266  |
| C96   | -6.134823027 | 9.611553582   | 1.029368120  |
| C97   | -4.006908243 | 8.607657135   | 1.541717762  |
| C98   | -6.336592001 | 8.676963366   | 0.012623019  |
| C99   | -4.180541426 | 7.677904042   | 0.511878224  |
| C100  | -5.345743740 | 7.730064700   | -0.247188204 |
| C101  | 4.061676070  | -4.001173508  | -9.018384860 |
| C102  | 2.635277117  | -3.735567934  | -8.569800763 |
| C103  | 1.182383204  | -2.173134570  | -7.297194169 |
| C104  | 0.678156410  | -0.823090402  | -7.819465203 |
| C105  | 1.076578570  | 1.605047868   | -7.775016793 |
| C106  | 2.263362914  | 2.549287657   | -7.960518983 |
| C107  | 4.558602097  | 3.173201207   | -7.459443494 |
| C108  | 5.096389579  | 3.403470442   | -8.858296463 |
| C109  | -2.751105892 | -3.495638333  | -9.175847477 |
| C110  | -3.774355881 | -2.398204560  | -8.857469406 |
| C111  | -2.261614857 | -4.158985321  | -7.868787137 |
| C112  | -1.547939007 | -5.492406885  | -8.157609359 |
| C113  | -0.887247941 | -6.024204833  | -6.906029957 |
| C114  | -4.167360593 | -0.076316409  | -8.197911420 |
| C115  | -3.685394736 | 1.206851422   | -8.844855620 |
| C116  | -4.523239104 | 0.050071142   | -6.695379892 |
| C117  | -3.293445997 | 0.026501882   | -5.828528697 |
| C118  | -2.535981335 | 1.191388193   | -5.612698299 |
| C119  | -2.812563126 | -1.194786940  | -5.328009758 |
| C120  | -1.298018190 | 1.117522325   | -4.965402795 |
| C121  | -1.578102564 | -1.267225887  | -4.675503284 |
| C122  | -0.807020103 | -0.111876801  | -4.513843710 |
| C123  | 7.939946824  | -6.287598243  | -4.806941700 |
| C124  | 9.108485009  | -6.349753898  | -3.810180704 |
| C125  | 6.618362048  | -6.600191049  | -4.087695914 |
| C126  | 5.364916586  | -6.410911603  | -4.879578479 |
| C127  | 5.010018070  | -7.040356544  | -6.055114612 |
| C128  | 3.279600166  | -5.887863333  | -5.293471832 |
| C129  | 10.317619534 | -7.557731869  | -2.095971943 |
| C130  | 11.675258281 | -7.339840920  | -2.727670035 |
| C131  | 0.637236979  | -6.834549520  | -0.214958455 |
| C132  | 2.128289121  | -6.877133958  | 0.103537805  |
| C133  | 3.045773938  | -7.036117201  | -1.146543697 |
| C134  | 2.961664140  | -8.491488976  | -1.678793352 |
| C135  | 3.996050846  | -8.855589569  | -2.746472776 |
| C136  | 4.010842603  | -10.349295242 | -3.138403328 |
| C137  | 4.502055937  | -6.753006622  | -0.739682083 |
| C138  | 3.599261615  | -0.702176793  | -2.254185454 |
| Fe139 | 3.800589422  | -1.989365414  | -3.810059135 |
| Fe140 | 2.262918094  | 0.579154040   | -1.174298061 |
| Fe141 | 4.982583294  | 0.515803562   | -1.530656106 |
| Fe142 | 3.773901131  | 0.528706639   | -3.813770708 |
| Fe143 | 3.740066932  | 2.724751014   | -2.519290013 |
| Fe144 | 4.788212537  | -2.049139828  | -1.469583654 |
| Fe145 | 2.294824980  | -2.276808201  | -1.768194577 |
| H146  | -6.257479882 | -7.477269353  | 0.390585097  |
| H147  | -6.433758254 | -6.495084032  | -0.901517630 |
| H148  | -9.719318080 | -4.847757567  | 1.355341523  |
| H149  | -8.768104742 | -6.156672358  | -0.417946986 |
| H150  | -8.602439419 | -7.256993377  | 0.946430436  |

|      |              |              |               |
|------|--------------|--------------|---------------|
| H151 | -8.002335889 | -2.722661952 | 2.083693040   |
| H152 | -8.766054672 | -5.642372014 | 3.961378567   |
| H153 | -9.627513374 | -3.019025004 | 2.738528403   |
| H154 | -8.013010842 | -6.312363003 | 6.056374574   |
| H155 | -6.116511535 | -5.873404141 | 3.672669714   |
| H156 | -7.829647732 | -4.606933025 | 6.520059188   |
| H157 | -2.935775530 | -1.828394272 | 3.316719179   |
| H158 | -5.100317333 | -3.705694198 | 3.159056764   |
| H159 | -3.842776785 | -6.223177860 | 3.339711917   |
| H160 | -4.835307558 | -0.172840853 | 7.292613645   |
| H161 | -5.725230295 | -2.345555462 | 5.603323119   |
| H162 | -3.571260476 | -6.332011564 | 5.096667772   |
| H163 | -4.659466393 | -1.458784851 | 3.091037636   |
| H164 | -4.278259087 | -3.735267273 | 7.555440602   |
| H165 | -5.958958176 | -1.482113735 | 7.756874662   |
| H166 | -0.483322327 | -3.193990225 | 3.667957410   |
| H167 | -0.807620698 | -2.100924921 | 2.305860013   |
| H168 | 0.861262664  | -2.368474839 | 2.814467177   |
| H169 | -1.313315679 | -1.038672487 | 4.527897151   |
| H170 | -3.332849699 | -4.840800283 | 9.366039553   |
| H171 | -1.953268884 | 2.095203466  | 5.363893652   |
| H172 | -1.468431864 | -0.255160146 | 9.177175433   |
| H173 | -1.762303010 | 3.207624169  | 9.575767813   |
| H174 | 1.026943250  | 0.354490314  | 3.121479348   |
| H175 | -0.201545159 | 1.117209473  | 4.166208534   |
| H176 | 9.325638175  | 2.021595998  | 4.434020220   |
| H177 | -2.879017726 | 3.455676121  | 6.016443157   |
| H178 | -2.754098756 | 4.095039167  | 8.394450288   |
| H179 | -1.114108609 | 3.600892401  | 5.827133525   |
| H180 | -0.980833030 | 4.258918179  | 8.370745084   |
| H181 | -2.550889607 | 1.682650848  | 7.760542882   |
| H182 | 0.423880204  | 2.279502736  | 7.325361792   |
| H183 | -1.294179553 | 0.106562846  | 6.426524095   |
| H184 | -0.662077977 | 0.408498465  | 2.606538550   |
| H185 | 1.612503942  | 4.259556347  | 0.199575787   |
| H186 | 0.782478826  | 4.485275775  | 1.763538817   |
| H187 | 2.687451138  | 5.332024109  | 2.310075527   |
| H188 | 3.228362406  | 4.683407805  | 4.851738739   |
| H189 | 4.811188126  | 4.239410650  | 1.718878882   |
| H190 | 6.628977121  | 2.592106558  | 1.364896571   |
| H191 | 6.495140719  | 1.546406945  | 5.549104237   |
| H192 | -0.747641651 | -2.512306735 | 6.427950537   |
| H193 | 0.253123673  | -5.559132156 | 6.425878918   |
| H194 | 0.855507446  | -4.943354448 | 7.980390942   |
| H195 | -1.838738060 | -4.427118570 | 6.816589531   |
| H196 | -2.878161755 | -3.279909913 | 10.095120184  |
| H197 | 4.630719258  | 3.150381882  | 5.888806959   |
| H198 | 1.655697392  | -1.482378545 | 5.017855670   |
| H199 | -0.786822144 | 0.621783676  | 11.740052769  |
| H200 | -0.977033844 | -1.082567043 | 11.251765949  |
| H201 | 1.630214608  | -0.751594260 | 10.431117165  |
| H202 | 11.169433108 | -7.021924400 | 4.000050908   |
| H203 | -1.738370739 | -5.969480401 | -4.133780611  |
| H204 | 1.282728219  | -6.019205461 | -1.843454449  |
| H205 | -2.289316628 | -6.232425258 | -8.492365235  |
| H206 | -0.804661362 | -5.360024754 | -8.956779318  |
| H207 | -3.112563511 | -4.348200669 | -7.196140753  |
| H208 | -3.098214094 | 1.054120809  | -9.781268679  |
| H209 | -3.344875479 | -4.246157038 | -9.720223482  |
| H210 | -3.339611268 | -2.180388483 | -2.306026429  |
| H211 | -3.940193728 | -4.960603539 | -1.167978709  |
| H212 | -2.261390985 | -1.024962670 | -8.480243805  |
| H213 | -5.113354643 | -0.304633220 | -8.730911084  |
| H214 | -1.035586496 | -2.410670955 | -9.620714831  |
| H215 | -1.282696677 | -5.804115350 | -2.440729705  |
| H216 | -1.593891489 | -3.460894930 | -7.340419559  |
| H217 | -1.201076361 | -3.801461686 | -10.487488451 |
| H218 | -6.739809450 | -3.438662116 | -2.873104904  |
| H219 | -3.464025403 | -2.404680960 | -0.550179998  |
| H220 | 0.811589638  | -5.303264617 | -7.569246694  |
| H221 | -2.308291943 | -4.323875755 | -1.049769488  |
| H222 | -3.828661639 | 2.586017532  | 3.072367543   |
| H223 | -2.884577476 | 0.554156512  | 1.387666036   |
| H224 | -8.125100688 | 0.758304144  | 3.775736526   |
| H225 | -7.253972684 | -0.068940019 | 1.039878998   |
| H226 | -6.922923062 | 4.074815815  | 2.381513734   |
| H227 | -8.332989908 | 8.741657234  | 4.452457065   |
| H228 | -6.846231875 | 5.254027405  | 5.328911896   |
| H229 | -8.900024387 | 5.456156833  | 3.486650656   |
| H230 | -6.240058247 | 6.829400757  | 2.751784492   |

|      |               |              |               |
|------|---------------|--------------|---------------|
| H231 | -10.798234145 | 9.545690763  | 1.104391980   |
| H232 | -3.258512561  | 4.248478749  | 1.291876361   |
| H233 | -4.802773950  | 3.948641353  | 0.483241413   |
| H234 | -9.807486973  | 10.458816064 | 3.274505105   |
| H235 | -8.373393515  | 5.636655688  | 1.811721720   |
| H236 | -6.170807434  | 2.022847792  | 1.361636179   |
| H237 | -7.017269893  | -0.580223990 | 3.471423632   |
| H238 | -9.832846507  | 1.962060590  | -0.243834715  |
| H239 | -2.116152062  | 1.535571772  | -2.673680618  |
| H240 | -10.201630741 | 0.228241801  | -0.185876358  |
| H241 | 10.288689282  | 3.256706050  | 2.635857078   |
| H242 | 8.679272720   | 3.339685508  | 2.369825262   |
| H243 | 1.555020170   | 5.982630530  | -1.443323208  |
| H244 | -0.695031472  | 5.459956697  | 0.267288310   |
| H245 | 1.728280000   | 8.056039156  | 0.318569486   |
| H246 | -3.438004757  | 3.525958074  | -1.613214124  |
| H247 | -5.102729518  | 4.156781371  | -2.795560547  |
| H248 | -6.681034955  | 3.395210927  | -4.211265148  |
| H249 | -4.788740495  | 5.398689308  | -1.847515791  |
| H250 | -5.513101807  | 1.255289906  | -4.104837801  |
| H251 | -7.293915147  | 1.278442164  | -3.903017488  |
| H252 | -0.027407510  | 11.583679246 | -1.846618890  |
| H253 | -1.184200866  | 12.917039460 | -1.677455179  |
| H254 | -0.911803994  | 10.213142382 | -3.359126160  |
| H255 | -2.600366120  | 9.705935639  | -3.351224725  |
| H256 | -3.771500550  | 9.140459875  | -6.081485430  |
| H257 | -2.651576073  | 4.845610127  | -5.763635517  |
| H258 | -7.258213465  | 8.690330984  | -0.574979538  |
| H259 | -3.101484944  | 8.537000419  | 2.149863018   |
| H260 | -4.656437465  | 7.781608872  | -2.949538832  |
| H261 | 1.065904840   | 5.370651833  | -3.901411159  |
| H262 | 2.336956779   | 7.195969944  | -3.244172054  |
| H263 | -1.388779923  | 4.855231640  | -3.373906574  |
| H264 | -8.351380995  | -0.193143263 | -1.508248498  |
| H265 | 3.634998000   | 10.002162317 | -4.161808997  |
| H266 | -6.075124568  | -0.948518206 | -3.091941902  |
| H267 | 0.536852812   | 6.354845475  | -5.261565706  |
| H268 | -3.396414684  | 6.953832145  | 0.287620575   |
| H269 | 3.335019481   | 10.300511628 | -2.436185186  |
| H270 | -3.068171843  | 7.695717103  | -6.714941177  |
| H271 | -5.110745854  | 8.926088228  | -4.169003629  |
| H272 | -5.172716819  | -3.529518505 | -3.447731179  |
| H273 | -5.755541352  | -3.323267713 | -0.807559468  |
| H274 | -6.907428761  | 10.359391436 | 1.222964092   |
| H275 | -5.227935094  | 1.394518139  | -1.635209480  |
| H276 | -0.496130272  | 8.009501371  | -3.710795521  |
| H277 | -1.740667292  | 6.341396831  | -6.005274127  |
| H278 | -0.673579739  | 4.194392372  | -4.838164640  |
| H279 | -3.583063839  | 5.865000874  | -3.668305981  |
| H280 | 0.785544316   | 8.892452195  | 2.951901694   |
| H281 | -0.452257431  | 9.745517061  | 0.112178172   |
| H282 | -0.067626362  | 12.609580243 | 0.400809153   |
| H283 | 2.265828886   | 9.407995889  | 2.106998500   |
| H284 | -2.431761621  | 10.635914367 | 1.731837213   |
| H285 | 4.585586635   | -3.049162704 | -9.187236188  |
| H286 | 4.555190997   | -4.488817295 | -8.150565433  |
| H287 | 7.921020946   | -5.245331019 | -5.158438501  |
| H288 | 5.024084889   | -5.142899583 | -10.404193388 |
| H289 | 3.487544682   | -5.623423945 | -10.105595202 |
| H290 | 5.510237226   | 4.767817290  | -0.964234244  |
| H291 | 5.767076763   | 7.442801231  | 0.491585389   |
| H292 | 4.822322882   | 8.089381729  | -3.617543336  |
| H293 | 4.148864820   | 5.611593600  | -0.156638706  |
| H294 | 6.836463886   | 8.043665236  | -0.591677020  |
| H295 | 5.384130550   | 2.768784588  | -6.852478032  |
| H296 | 5.966908973   | 6.742759073  | -2.351222024  |
| H297 | 5.337644947   | -7.057979449 | 4.990498795   |
| H298 | 7.082500596   | -7.921080798 | 2.619391988   |
| H299 | 3.602931522   | 1.348010014  | -6.897543618  |
| H300 | 5.113037976   | -0.158581830 | 3.316030547   |
| H301 | 0.534911793   | 1.564614330  | -8.728088851  |
| H302 | -1.206335197  | -2.227144322 | -4.310456637  |
| H303 | 0.407724226   | 2.093832468  | -7.045756932  |
| H304 | 4.259916604   | -4.566385469 | 4.493030227   |
| H305 | 2.057241538   | 0.059367388  | -6.613305289  |
| H306 | 3.948489269   | -5.147841654 | 2.851533530   |
| H307 | 4.800576311   | -7.351387993 | 3.319592042   |
| H308 | 6.443443480   | -5.520819267 | 2.568633895   |
| H309 | 6.671573180   | -5.099109608 | 4.274147076   |
| H310 | -5.189986579  | -0.786495529 | -6.440868749  |

|       |              |               |              |
|-------|--------------|---------------|--------------|
| H311  | 5.950010242  | -9.509820187  | 4.885289942  |
| H312  | 4.974206068  | -11.792185944 | 3.084819168  |
| H313  | 0.171800203  | -0.155365855  | -4.036166544 |
| H314  | 6.264160440  | -11.885525826 | 5.700787038  |
| H315  | 4.701530895  | -12.163106172 | 5.297701270  |
| H316  | 5.504520636  | -3.372389003  | 2.043047284  |
| H317  | -0.692561913 | 2.014491145   | -4.817993370 |
| H318  | -3.401517627 | -2.104896381  | -5.458749996 |
| H319  | 7.665511419  | -9.932054957  | -1.676679079 |
| H320  | 6.639154087  | -7.650913524  | -3.750898404 |
| H321  | 6.645288318  | -8.163802068  | -0.121015688 |
| H322  | 6.798588334  | -10.537073874 | -2.814832588 |
| H323  | 4.878739964  | 2.584638374   | -9.585332575 |
| H324  | 6.358861406  | -5.017011444  | -0.212675386 |
| H325  | 2.319199788  | -7.674821678  | 0.831313088  |
| H326  | 3.250678769  | -1.988452758  | -7.705833315 |
| H327  | 3.095590282  | -9.155677008  | -0.810541261 |
| H328  | 3.117246904  | -7.036664735  | -7.056798632 |
| H329  | 2.270329486  | -5.504248099  | -5.221423708 |
| H330  | 6.568982265  | -12.457546594 | 3.454458425  |
| H331  | 5.778775895  | -1.111492409  | 2.025059567  |
| H332  | 8.353379430  | -5.808057578  | 0.808788276  |
| H333  | 7.243206229  | -3.752060577  | -0.080762129 |
| H334  | 8.980786791  | -6.870074839  | 2.790772054  |
| H335  | 3.604303331  | -2.764425382  | 5.110617343  |
| H336  | 3.794098561  | -8.278191415  | -3.661577140 |
| H337  | 5.005736691  | -8.581560281  | -2.411978521 |
| H338  | 1.945626277  | -8.666509214  | -2.064799872 |
| H339  | 1.326187241  | -2.135771551  | -6.205348803 |
| H340  | -2.903717787 | 2.147945645   | -5.992195724 |
| H341  | -5.086325970 | 0.988190596   | -6.575136871 |
| H342  | 2.358138260  | -5.914912563  | 0.591653644  |
| H343  | 8.511159816  | -7.340214845  | 0.579547739  |
| H344  | 7.402882111  | -9.261492692  | 0.661242266  |
| H345  | 4.163804049  | -1.137302447  | 5.149186298  |
| H346  | 5.568878030  | -7.708069997  | -6.698601298 |
| H347  | 6.557819150  | -5.993222114  | -3.176792316 |
| H348  | 0.435456210  | -2.932445730  | -7.536357668 |
| H349  | 4.264256733  | 4.139613103   | -7.022418243 |
| H350  | 7.795593130  | 0.164163606   | 3.930453471  |
| H351  | 7.807799934  | 0.574082062   | 2.200136246  |
| H352  | 9.024123302  | -6.886008349  | -6.441712890 |
| H353  | 8.264255680  | -8.124341641  | -5.688520125 |
| H354  | 10.312676620 | -8.570496055  | -1.664109287 |
| H355  | 8.594050168  | -8.271873865  | -3.129752628 |
| H356  | 11.720357962 | -7.568164791  | -3.820276211 |
| H357  | 10.175621663 | -6.846999272  | -1.266244679 |
| H358  | 10.560725031 | 0.358806879   | 2.151244139  |
| H359  | -2.970576941 | 13.204885519  | 3.708595477  |
| H360  | 10.249856037 | -6.874796042  | 5.519505352  |
| H361  | 9.514869451  | -4.463415195  | 4.404877940  |
| H362  | -4.694839450 | 12.303105656  | 1.396025658  |
| H363  | -4.085866742 | 10.294513615  | 3.652090160  |
| H364  | -5.673199078 | 10.995257909  | 3.288037632  |
| H365  | 1.308567928  | -3.228981017  | -1.139885471 |
| H366  | 3.713212598  | -0.521187747  | 0.683667277  |
| H367  | -6.433932835 | 6.808441008   | -1.574246827 |
| H368  | 0.658793699  | -1.118501948  | 0.076712439  |
| H369  | -1.774630778 | -0.158835264  | -0.828975585 |
| Mo370 | 3.840329621  | -4.368156422  | -2.496285027 |
| N371  | -6.933871910 | -7.161432579  | -0.308594431 |
| N372  | -8.801361559 | -4.651661862  | 1.747273659  |
| N373  | -8.207863247 | -4.967605196  | 4.478834671  |
| N374  | -5.524616286 | -5.819490230  | 4.502571921  |
| N375  | -4.280588430 | -3.408533543  | 3.685346685  |
| N376  | -4.940160426 | -1.800700495  | 5.968183684  |
| N377  | -3.687151818 | -3.172496241  | 8.173341019  |
| N378  | -1.098226291 | -4.383396969  | 7.524648770  |
| N379  | 0.225384777  | -2.458562020  | 6.132110962  |
| N380  | -0.399548787 | 0.444938200   | 6.788265089  |
| N381  | -0.686157147 | 0.200741318   | 9.652461742  |
| N382  | 5.498309168  | -11.552795714 | 5.110802442  |
| N383  | 6.416172457  | -9.301235574  | 3.996126560  |
| N384  | 5.024369229  | -3.360041180  | 2.947028819  |
| N385  | 4.273708300  | -2.068132085  | 4.755899636  |
| N386  | 5.386455621  | -1.075483410  | 2.974861242  |
| N387  | 9.060941492  | -6.986910329  | 3.825386423  |
| N388  | -5.849093086 | -2.940254508  | -2.927178789 |
| N389  | -1.928404161 | -5.577749207  | -3.204829529 |
| N390  | -6.068032210 | -0.437227926  | -2.192991949 |

|      |               |               |               |
|------|---------------|---------------|---------------|
| N391 | -8.334552067  | 0.676579426   | -0.979898157  |
| N392 | -7.840736153  | 0.354159387   | 1.767053936   |
| N393 | -5.688955113  | 2.084252049   | 2.263011240   |
| N394 | -3.092434404  | 2.675780448   | -1.097409476  |
| N395 | -2.334078656  | 0.695807614   | -0.697261349  |
| N396 | -6.307925353  | 4.722167813   | 2.868528030   |
| N397 | -9.721685613  | 7.742608282   | 1.595186751   |
| N398 | -9.639662610  | 9.521043800   | 2.919469128   |
| N399 | 9.474074185   | 2.694596585   | 2.376953659   |
| N400 | 6.313433177   | 7.200033618   | -0.341108458  |
| N401 | 4.204062319   | 8.447457280   | -2.894291773  |
| N402 | 1.546599305   | 7.839007392   | -3.354916876  |
| N403 | -3.167196295  | 6.391421763   | -4.458104920  |
| N404 | -3.384060969  | 8.218531361   | -5.904955531  |
| N405 | -4.444785466  | 8.230283540   | -3.844232432  |
| N406 | 0.657140238   | 6.330801816   | -1.072835832  |
| N407 | 0.967358054   | 8.209299997   | 0.986098870   |
| N408 | -0.358210973  | 10.597767117  | 0.663750325   |
| N409 | -1.883936840  | 10.370202865  | -3.064991686  |
| N410 | -2.737586449  | 11.605417671  | 1.705793978   |
| N411 | 4.074839599   | -4.796626595  | -10.247290259 |
| N412 | 2.434931249   | -2.561416395  | -7.934748036  |
| N413 | 1.368515851   | 0.244052171   | -7.362582864  |
| N414 | 3.463717237   | 2.216507414   | -7.422098692  |
| N415 | -1.718347109  | -3.010088267  | -10.099319223 |
| N416 | -3.274679466  | -1.172965854  | -8.525559803  |
| N417 | 8.146757305   | -7.150077163  | -5.984194782  |
| N418 | 4.267076678   | -5.681441321  | -4.422263871  |
| N419 | 3.698205492   | -6.696083600  | -6.295319917  |
| N420 | 9.248223894   | -7.485863354  | -3.074990262  |
| N421 | 0.207880098   | 2.197979471   | 0.176342676   |
| N422 | 2.674590121   | -0.413712717  | 0.550980601   |
| N423 | 1.021650713   | 1.621852105   | -0.349277259  |
| N424 | 1.903606485   | -0.871070217  | 1.349968964   |
| O425 | -6.566675796  | -5.081159191  | 1.661594594   |
| O426 | -7.349196095  | -2.854588327  | 4.518957715   |
| O427 | -5.389832343  | -5.237086218  | 6.706723870   |
| O428 | -2.505232849  | -4.038387479  | 4.964222989   |
| O429 | -3.095233332  | -0.568113885  | 5.493241524   |
| O430 | -3.276146169  | -1.090872513  | 9.031741813   |
| O431 | -0.552061682  | -4.105192249  | 9.734693656   |
| O432 | 2.164239266   | -3.700824315  | 6.003314945   |
| O433 | 1.880933344   | 0.362532518   | 6.629488169   |
| O434 | 0.809983232   | 1.906558569   | 9.745167629   |
| O435 | 1.529069310   | -0.336527268  | 12.425207648  |
| O436 | 7.051520882   | -10.348782939 | 2.035173148   |
| O437 | 8.064246541   | -7.731994972  | 5.759705873   |
| O438 | 11.548733421  | -4.500402027  | 4.548594297   |
| O439 | -5.618729492  | -0.829421207  | 0.021468257   |
| O440 | -3.7111735061 | -4.423344898  | -4.016338401  |
| O441 | -7.098127425  | 2.515305357   | -0.426499113  |
| O442 | -6.322473063  | 3.049913326   | -3.374238946  |
| O443 | -9.759510243  | 1.513132172   | 2.261036682   |
| O444 | -5.620144318  | 1.453059613   | 4.458188279   |
| O445 | -4.231847485  | 5.034611846   | 3.766295779   |
| O446 | -6.516051331  | 7.268682570   | 5.322338719   |
| O447 | 10.805457258  | -0.045241926  | 4.138074765   |
| O448 | 3.582571706   | 4.709543094   | 3.943821965   |
| O449 | 3.613514819   | 8.371424898   | -0.693359934  |
| O450 | 0.983342976   | 10.062566361  | -3.547582083  |
| O451 | -1.418038303  | 7.165509498   | -1.544021697  |
| O452 | -0.699902825  | 7.150829698   | 2.156857169   |
| O453 | 2.447015815   | 5.706158868   | 1.438037534   |
| O454 | 0.856623886   | 11.592510482  | 2.332453367   |
| O455 | -2.491511325  | 13.574721516  | 0.583125076   |
| O456 | -3.246373206  | 11.019579343  | -1.348335245  |
| O457 | -4.948729347  | 13.698851186  | 3.609875906   |
| O458 | -5.489898283  | 6.831958381   | -1.324245820  |
| O459 | 1.733465099   | -4.588021341  | -8.755889022  |
| O460 | -0.280919227  | -0.737321797  | -8.614962755  |
| O461 | 2.086822273   | 3.625397734   | -8.555282608  |
| O462 | 5.753185031   | 4.382018933   | -9.171267852  |
| O463 | -4.995323461  | -2.625260072  | -8.880812126  |
| O464 | -1.501264003  | -6.607887095  | -6.019218205  |
| O465 | 0.432353962   | -5.784031984  | -6.770448049  |
| O466 | -3.943713721  | 2.330544341   | -8.435959178  |
| O467 | 9.923063187   | -5.413110372  | -3.695519502  |
| O468 | 12.671630866  | -7.004118895  | -2.104509418  |
| O469 | 0.326342778   | -6.215879052  | -1.361201032  |
| O470 | -0.224255906  | -7.279519227  | 0.541454887   |

|                                    |      |                                  |               |              |
|------------------------------------|------|----------------------------------|---------------|--------------|
|                                    | O471 | 5.159046308                      | -10.891799412 | -3.317140488 |
|                                    | O472 | 2.898300349                      | -10.928452803 | -3.289645254 |
|                                    | O473 | 5.102149666                      | -5.774689229  | -1.363477106 |
|                                    | O474 | 5.057645010                      | -7.453013967  | 0.129244749  |
|                                    | O475 | 2.629986288                      | -6.082274262  | -2.128169033 |
|                                    | O476 | 8.947603475                      | -6.565685122  | 1.032546900  |
|                                    | O477 | 6.972695787                      | -4.550026273  | 0.411690848  |
|                                    | O478 | -4.369949358                     | 4.736144210   | -2.451267282 |
|                                    | O479 | 7.752379718                      | -10.429306328 | -2.520570696 |
|                                    | O480 | 7.517825037                      | -8.639745231  | -0.101984697 |
|                                    | S481 | 3.557735148                      | 4.948871535   | -2.406925935 |
|                                    | S482 | 1.960653192                      | 1.717861265   | -3.330424842 |
|                                    | S483 | 2.032877510                      | -3.336682350  | -3.673183967 |
|                                    | S484 | 3.866910277                      | 2.100623309   | -0.395404775 |
|                                    | S485 | 0.542609169                      | -0.991986578  | -1.329926833 |
|                                    | S486 | 3.963526217                      | -0.722561911  | -5.617653872 |
|                                    | S487 | 3.477640292                      | -3.429312799  | -0.316029365 |
|                                    | S488 | 5.576816452                      | 1.752272772   | -3.347648442 |
|                                    | S489 | 5.679790015                      | -3.067045992  | -3.235515437 |
|                                    | S490 | 6.227620221                      | -0.869621227  | -0.315203266 |
|                                    | end  |                                  |               |              |
| product <b>Fe2-NH-NH-b</b> (S=3/2) |      | <b>bm526hxexpfe2n2h347.car_3</b> |               |              |
| Fe( 139) 2.157                     | C1   | -7.846386180                     | -5.297110566  | 0.398072742  |
| Fe( 140) 0.124                     | C2   | -8.143862136                     | -6.352244558  | -0.675333493 |
| Fe( 141) 1.808                     | C3   | -8.797508797                     | -3.498651014  | 1.776362652  |
| Fe( 142) -2.496                    | C4   | -8.271010379                     | -3.877213859  | 3.157412469  |
| Fe( 143) 3.118                     | C5   | -8.007457509                     | -5.626235196  | 4.849072337  |
| Fe( 144) -2.272                    | C6   | -6.481185230                     | -5.747832790  | 4.897267034  |
| Fe( 145) 0.158                     | C7   | -4.412273148                     | -5.994425769  | 3.623270520  |
|                                    | C8   | -3.860366921                     | -4.577761349  | 3.801890397  |
|                                    | C9   | -4.185736500                     | -2.193524672  | 3.311325510  |
|                                    | C10  | -4.272594391                     | -1.704330724  | 4.764641932  |
|                                    | C11  | -5.440435737                     | -1.698901828  | 6.873599794  |
|                                    | C12  | -4.419917761                     | -2.340612982  | 7.824831506  |
|                                    | C13  | -3.481069492                     | -4.442831771  | 8.669621769  |
|                                    | C14  | -1.988970219                     | -4.697546478  | 8.411446999  |
|                                    | C15  | -0.241614601                     | -5.220797354  | 6.755151109  |
|                                    | C16  | 0.529946007                      | -4.058667669  | 6.122192942  |
|                                    | C17  | 0.284427339                      | -1.724014033  | 5.283499082  |
|                                    | C18  | 0.380951656                      | -0.585851720  | 6.315121778  |
|                                    | C19  | -0.537003911                     | -1.402468305  | 4.020095745  |
|                                    | C20  | -0.134423011                     | -0.041848949  | 3.442171273  |
|                                    | C21  | -0.412199084                     | -2.551331362  | 3.010778261  |
|                                    | C22  | -0.833606404                     | 1.050706222   | 7.695314256  |
|                                    | C23  | -0.565534940                     | 0.574750755   | 9.135652032  |
|                                    | C24  | -2.153852717                     | 1.844931912   | 7.555279727  |
|                                    | C25  | -2.269624081                     | 2.924315523   | 8.637593562  |
|                                    | C26  | -2.264047154                     | 2.470639201   | 6.158706725  |
|                                    | C27  | -1.123928605                     | -0.930480835  | 10.951011849 |
|                                    | C28  | 0.321130291                      | -1.237083673  | 11.288562452 |
|                                    | C29  | 5.472897801                      | -11.957133437 | 3.178450646  |
|                                    | C30  | 6.177526783                      | -10.663930507 | 2.784294686  |
|                                    | C31  | 6.473652847                      | -8.295627668  | 3.489752800  |
|                                    | C32  | 7.649598059                      | -7.991802656  | 4.435545150  |
|                                    | C33  | 5.298462860                      | -7.335067566  | 3.737540077  |
|                                    | C34  | 5.660691799                      | -5.878095522  | 3.460735803  |
|                                    | C35  | 4.423094307                      | -4.985708628  | 3.405480986  |
|                                    | C36  | 4.616142654                      | -2.498238242  | 3.632188446  |
|                                    | C37  | 9.899397028                      | -7.032501278  | 4.592140981  |
|                                    | C38  | 10.100693437                     | -5.538833260  | 4.722657248  |
|                                    | C39  | -5.238174062                     | -2.454104457  | -2.098808599 |
|                                    | C40  | -5.622088392                     | -1.055187532  | -1.579463524 |
|                                    | C41  | -3.711285820                     | -2.627632841  | -1.953137161 |
|                                    | C42  | -3.181873391                     | -4.064208825  | -2.148267001 |
|                                    | C43  | -2.826052490                     | -4.446522770  | -3.584703010 |
|                                    | C44  | -6.011759001                     | 1.255640934   | -2.352339192 |
|                                    | C45  | -7.153351141                     | 1.661330018   | -1.410244465 |
|                                    | C46  | -6.106998149                     | 1.956086966   | -3.714440818 |
|                                    | C47  | -9.380411717                     | 1.116011820   | -0.544240205 |
|                                    | C48  | -9.072823992                     | 1.032084977   | 0.955060973  |
|                                    | C49  | -7.499660442                     | 0.329044603   | 2.697445501  |
|                                    | C50  | -6.305731309                     | 1.219029067   | 3.043227439  |
|                                    | C51  | -4.702309514                     | 2.925191969   | 2.333040196  |
|                                    | C52  | -5.161388010                     | 4.191009317   | 3.099031988  |
|                                    | C53  | -4.033183254                     | 3.434956487   | 1.048146715  |
|                                    | C54  | -3.333578372                     | 2.429673453   | 0.195847517  |
|                                    | C55  | -2.851842519                     | 1.160994363   | 0.400885865  |
|                                    | C56  | -2.305486525                     | 1.753686696   | -1.671642020 |
|                                    | C57  | -6.947617251                     | 5.884176741   | 3.257814495  |
|                                    | C58  | -6.927315099                     | 5.923152809   | 4.784557019  |

|      |               |               |              |
|------|---------------|---------------|--------------|
| C59  | -8.393092211  | 6.007160787   | 2.721207966  |
| C60  | -8.986874276  | 7.384931275   | 2.689348517  |
| C61  | -8.929182953  | 8.424024167   | 3.598067241  |
| C62  | -10.154828069 | 8.999520933   | 1.843445900  |
| C63  | 9.044287471   | 1.226977849   | 4.083141931  |
| C64  | 10.071107735  | 0.132129188   | 3.864131162  |
| C65  | 7.653519194   | 0.613376193   | 3.778738293  |
| C66  | 6.523207844   | 1.591511720   | 3.997377612  |
| C67  | 5.887272291   | 1.721001682   | 5.245430880  |
| C68  | 6.083224314   | 2.416339007   | 2.947512732  |
| C69  | 4.844405503   | 2.635017347   | 5.439481622  |
| C70  | 5.059472082   | 3.345152013   | 3.130145898  |
| C71  | 4.432089600   | 3.445842370   | 4.374521362  |
| C72  | 5.552711399   | 6.866646852   | -0.583404849 |
| C73  | 4.515141323   | 7.991670428   | -0.752674126 |
| C74  | 4.844975467   | 5.521451873   | -0.439677665 |
| C75  | 3.599162055   | 9.718017317   | -2.265912360 |
| C76  | 2.141874643   | 9.365007848   | -2.575865684 |
| C77  | 0.507251382   | 7.491944689   | -2.779595764 |
| C78  | -0.052848464  | 7.023186899   | -1.413116966 |
| C79  | 0.582606741   | 6.334250316   | -3.804380319 |
| C80  | -0.662529336  | 5.473875042   | -4.061385605 |
| C81  | -1.761710555  | 6.087719496   | -4.943436635 |
| C82  | -3.275033511  | 7.991899226   | -4.391589832 |
| C83  | 0.340738238   | 5.915478232   | 0.735511235  |
| C84  | 0.118498787   | 7.054013314   | 1.742717048  |
| C85  | 1.302359025   | 4.895080104   | 1.380020664  |
| C86  | 1.164771913   | 9.036391960   | 2.729765782  |
| C87  | 0.582831356   | 10.421409532  | 2.491474658  |
| C88  | -0.695654895  | 11.848562436  | 0.977286604  |
| C89  | -2.002085143  | 12.375144415  | 1.616954093  |
| C90  | -0.750146018  | 11.969520012  | -0.548137409 |
| C91  | -1.884957235  | 11.185923017  | -1.197698696 |
| C92  | -4.042814700  | 11.819308720  | 2.855152930  |
| C93  | -3.999264545  | 12.832209513  | 3.991687754  |
| C94  | -4.758060801  | 10.522802138  | 3.327065204  |
| C95  | -4.946731934  | 9.531009261   | 2.201006285  |
| C96  | -6.079096784  | 9.594570807   | 1.375296038  |
| C97  | -3.972158213  | 8.561046157   | 1.913657592  |
| C98  | -6.223251166  | 8.740479703   | 0.278809927  |
| C99  | -4.082591735  | 7.719500838   | 0.802458285  |
| C100 | -5.211268401  | 7.823080683   | -0.006370626 |
| C101 | 4.579375478   | -3.392869878  | -9.013747326 |
| C102 | 3.130968841   | -3.135946991  | -8.634086669 |
| C103 | 1.617447309   | -1.656874794  | -7.335144762 |
| C104 | 1.166416318   | -0.260645287  | -7.779757725 |
| C105 | 1.607805008   | 2.147860801   | -7.542045879 |
| C106 | 2.816738575   | 3.078809819   | -7.600676063 |
| C107 | 5.080801741   | 3.637698178   | -6.908569233 |
| C108 | 5.687351810   | 3.963181839   | -8.258739483 |
| C109 | -2.218536341  | -2.763910840  | -9.547225359 |
| C110 | -3.245903958  | -1.680124497  | -9.199529004 |
| C111 | -1.823921951  | -3.543943686  | -8.273611508 |
| C112 | -1.103390431  | -4.859249600  | -8.624870147 |
| C113 | -0.516101408  | -5.487132586  | -7.381134254 |
| C114 | -3.648003044  | 0.599315119   | -8.413607221 |
| C115 | -3.113959874  | 1.918588187   | -8.934099561 |
| C116 | -4.098372128  | 0.627629936   | -6.932943586 |
| C117 | -2.922029256  | 0.531576819   | -6.001556023 |
| C118 | -2.170989921  | 1.670164568   | -5.665639577 |
| C119 | -2.474745606  | -0.728240790  | -5.567018021 |
| C120 | -0.967203409  | 1.539360608   | -4.964733073 |
| C121 | -1.274806387  | -0.857182316  | -4.862733310 |
| C122 | -0.506647701  | 0.275364323   | -4.580213032 |
| C123 | 8.125070186   | -6.044682408  | -4.745156801 |
| C124 | 9.232631154   | -6.203338993  | -3.694070285 |
| C125 | 6.760940638   | -6.426024991  | -4.152066999 |
| C126 | 5.569357453   | -6.149466239  | -5.010384864 |
| C127 | 5.289342789   | -6.664824876  | -6.259283222 |
| C128 | 3.518756235   | -5.569399740  | -5.507530995 |
| C129 | 10.323247697  | -7.555965701  | -2.008701338 |
| C130 | 11.710984089  | -7.271632618  | -2.540940443 |
| C131 | 0.541224999   | -6.844355718  | -0.664921810 |
| C132 | 2.009670494   | -6.911981885  | -0.261144126 |
| C133 | 3.001271627   | -6.991329557  | -1.462178114 |
| C134 | 2.943121923   | -8.406013755  | -2.096964926 |
| C135 | 4.034578292   | -8.701009031  | -3.128938601 |
| C136 | 4.047307911   | -10.159227478 | -3.639141657 |
| C137 | 4.426227262   | -6.751971284  | -0.938008121 |
| C138 | 3.728074654   | -0.580297873  | -2.069949634 |



|       |              |              |               |
|-------|--------------|--------------|---------------|
| Fe139 | 4.007617192  | -1.777043797 | -3.672066926  |
| Fe140 | 2.327049502  | 0.577977733  | -0.955449649  |
| Fe141 | 5.094019726  | 0.499036462  | -1.220688935  |
| Fe142 | 4.016106098  | 0.731129951  | -3.507377920  |
| Fe143 | 3.894484087  | 2.874789981  | -2.022185131  |
| Fe144 | 4.805854750  | -2.042895778 | -1.287761816  |
| Fe145 | 2.155681625  | -2.230006757 | -1.890528465  |
| H146  | -6.399244216 | -7.405768205 | -0.567629553  |
| H147  | -6.420698087 | -6.306157793 | -1.772943029  |
| H148  | -9.828993649 | -4.742519646 | 0.382402801   |
| H149  | -8.766681064 | -5.885433255 | -1.455841484  |
| H150  | -8.781408658 | -7.119266940 | -0.202419699  |
| H151  | -8.109084712 | -2.742380857 | 1.372943318   |
| H152  | -9.033752270 | -5.766011496 | 2.964472025   |
| H153  | -9.781782453 | -3.027570023 | 1.903856449   |
| H154  | -8.448537777 | -6.612959415 | 5.044054215   |
| H155  | -6.400587364 | -6.043605577 | 2.858610768   |
| H156  | -8.297774811 | -4.952464110 | 5.666161187   |
| H157  | -3.161036000 | -2.001634748 | 2.970918704   |
| H158  | -5.297676326 | -3.848120050 | 2.521029407   |
| H159  | -4.117264487 | -6.385068220 | 2.640255982   |
| H160  | -5.292145661 | -0.612538030 | 6.932573610   |
| H161  | -6.096953795 | -2.634981607 | 5.040549799   |
| H162  | -3.950010701 | -6.621646820 | 4.395401571   |
| H163  | -4.868036694 | -1.603601417 | 2.684424098   |
| H164  | -4.773291758 | -4.186901503 | 6.981009951   |
| H165  | -6.451217318 | -1.937148521 | 7.231369095   |
| H166  | -0.846871546 | -3.476897394 | 3.412918453   |
| H167  | -0.957540926 | -2.311919440 | 2.083072530   |
| H168  | 0.637049462  | -2.739417376 | 2.743311268   |
| H169  | -1.589811940 | -1.329115511 | 4.326310805   |
| H170  | -3.967528032 | -5.423121173 | 8.784695671   |
| H171  | -2.259511373 | 1.715942933  | 5.360403883   |
| H172  | -2.058344891 | -0.881108163 | 9.033887582   |
| H173  | -2.270657478 | 2.496836715  | 9.650474013   |
| H174  | 0.931338466  | -0.014970942 | 3.175631956   |
| H175  | -0.332081178 | 0.775672345  | 4.150444878   |
| H176  | 9.065222698  | 1.495245640  | 5.157207232   |
| H177  | -3.201714343 | 3.036624233  | 6.066636260   |
| H178  | -3.206349778 | 3.484580389  | 8.502402310   |
| H179  | -1.428881399 | 3.168247883  | 5.982446141   |
| H180  | -1.432520644 | 3.637523750  | 8.569901829   |
| H181  | -2.988721481 | 1.132814487  | 7.688301645   |
| H182  | 0.011366099  | 1.718228329  | 7.466808187   |
| H183  | -1.676172810 | -0.356761728 | 6.307608495   |
| H184  | -0.717285097 | 0.169878912  | 2.533206167   |
| H185  | 1.643395026  | 4.198675572  | 0.600231708   |
| H186  | 0.721126718  | 4.330175648  | 2.123495737   |
| H187  | 2.601065217  | 5.100522931  | 2.849406318   |
| H188  | 2.988764741  | 4.277493063  | 5.372171809   |
| H189  | 4.717764362  | 3.965030406  | 2.300814704   |
| H190  | 6.532873840  | 2.312342693  | 1.957635772   |
| H191  | 6.202700437  | 1.091738114  | 6.082565953   |
| H192  | -1.182585588 | -2.986292094 | 6.179203367   |
| H193  | -0.215034323 | -6.057968175 | 6.042960380   |
| H194  | 0.300686171  | -5.527550311 | 7.658917742   |
| H195  | -2.313271400 | -4.909983287 | 6.364555242   |
| H196  | -3.534047140 | -3.918592736 | 9.631953776   |
| H197  | 4.343471290  | 2.701107748  | 6.409404019   |
| H198  | 1.322368739  | -1.924227027 | 4.989732170   |
| H199  | -1.514427149 | -0.203340831 | 11.682007163  |
| H200  | -1.688479360 | -1.868723678 | 11.070598192  |
| H201  | 0.954674334  | -1.543038511 | 10.423993653  |
| H202  | 10.802548721 | -7.485522126 | 4.154993907   |
| H203  | -1.544719396 | -5.618849914 | -4.668674538  |
| H204  | 1.284289457  | -5.913235794 | -2.185070036  |
| H205  | -1.827334566 | -5.564257423 | -9.057416903  |
| H206  | -0.312984635 | -4.674639883 | -9.366626567  |
| H207  | -2.719609848 | -3.777191244 | -7.677515032  |
| H208  | -2.450806616 | 1.830959304  | -9.826708081  |
| H209  | -2.782061182 | -3.455632320 | -10.191931301 |
| H210  | -3.210904228 | -1.947778129 | -2.661872174  |
| H211  | -3.934437079 | -4.793626593 | -1.799894200  |
| H212  | -1.740129283 | -0.356333224 | -8.652853661  |
| H213  | -4.560247483 | 0.423817270  | -9.021411350  |
| H214  | -0.461328016 | -1.681352959 | -9.784838309  |
| H215  | -1.218676800 | -5.608722921 | -2.938593933  |
| H216  | -1.186065417 | -2.903908799 | -7.643706981  |
| H217  | -0.592813420 | -2.986643909 | -10.782162451 |
| H218  | -6.572767099 | -3.111203673 | -3.535417295  |

|      |               |              |               |
|------|---------------|--------------|---------------|
| H219 | -3.442298683  | -2.305020420 | -0.936686410  |
| H220 | 1.222252568   | -4.729986216 | -7.891509926  |
| H221 | -2.301622637  | -4.214435296 | -1.506467381  |
| H222 | -3.972997010  | 2.426280169  | 2.987045775   |
| H223 | -2.905583412  | 0.511505079  | 1.265864391   |
| H224 | -8.3337661646 | 0.664434610  | 3.324533918   |
| H225 | -7.324467761  | -0.037877643 | 0.601851894   |
| H226 | -7.013334249  | 4.004452562  | 2.235990356   |
| H227 | -8.424508405  | 8.537687182  | 4.550766040   |
| H228 | -7.114749057  | 4.931326569  | 5.262635281   |
| H229 | -9.041673996  | 5.306606404  | 3.276786797   |
| H230 | -6.328803307  | 6.713430124  | 2.879926865   |
| H231 | -10.779108996 | 9.612300073  | 1.198928207   |
| H232 | -3.301180711  | 4.199783177  | 1.355941675   |
| H233 | -4.792090645  | 3.945156056  | 0.433849258   |
| H234 | -9.833425589  | 10.358012945 | 3.450896562   |
| H235 | -8.384442406  | 5.657913329  | 1.676426337   |
| H236 | -6.228059268  | 2.015002652  | 1.119946282   |
| H237 | -7.260630222  | -0.698120029 | 3.010331849   |
| H238 | -9.796979305  | 2.118362264  | -0.716098162  |
| H239 | -1.889988587  | 1.725057016  | -2.676023138  |
| H240 | -10.165122441 | 0.384501113  | -0.777270988  |
| H241 | 10.151088141  | 2.855019509  | 3.516410341   |
| H242 | 8.556522691   | 3.002547770  | 3.190012424   |
| H243 | 1.734138421   | 6.072631819  | -0.904960224  |
| H244 | -0.636679349  | 5.429300329  | 0.601116315   |
| H245 | 1.798793343   | 7.978459024  | 1.014283061   |
| H246 | -3.280838896  | 3.648942570  | -1.586289402  |
| H247 | -4.875917482  | 4.434610244  | -2.797193147  |
| H248 | -6.383121702  | 3.791293916  | -4.351086987  |
| H249 | -4.592447709  | 5.592299561  | -1.740120243  |
| H250 | -5.258712698  | 1.622115451  | -4.334432174  |
| H251 | -7.046413068  | 1.672186622  | -4.213658709  |
| H252 | 0.224938472   | 11.697083551 | -0.976204623  |
| H253 | -0.925302809  | 13.030963630 | -0.783940942  |
| H254 | -0.579374488  | 10.444652188 | -2.628741144  |
| H255 | -2.272014394  | 9.958426525  | -2.752562516  |
| H256 | -3.242958400  | 9.660612385  | -5.578042968  |
| H257 | -2.242335979  | 5.299748662  | -5.542908031  |
| H258 | -7.117743520  | 8.791029879  | -0.347534310  |
| H259 | -3.101478176  | 8.437750385  | 2.563180997   |
| H260 | -4.356978509  | 8.062748138  | -2.640208926  |
| H261 | 1.381974940   | 5.654461541  | -3.469124660  |
| H262 | 2.623802188   | 7.383894881  | -2.533776987  |
| H263 | -1.099677334  | 5.116333207  | -3.115639102  |
| H264 | -8.242974422  | 0.044771210  | -2.019649549  |
| H265 | 3.998569268   | 10.274880921 | -3.123464445  |
| H266 | -5.868832567  | -0.618942396 | -3.507613969  |
| H267 | 0.927246165   | 6.766079081  | -4.758241939  |
| H268 | -3.282539782  | 7.017935513  | 0.562610464   |
| H269 | 3.569820509   | 10.403152116 | -1.406021110  |
| H270 | -2.531705754  | 8.258616496  | -6.293122670  |
| H271 | -4.709178789  | 9.316473495  | -3.781942000  |
| H272 | -4.971866953  | -3.159090828 | -4.017191483  |
| H273 | -5.722703247  | -3.168750864 | -1.407538573  |
| H274 | -6.868011501  | 10.319811337 | 1.588059728   |
| H275 | -5.102807511  | 1.605083271  | -1.842343993  |
| H276 | -0.163060803  | 8.285574527  | -3.123361648  |
| H277 | -1.309126357  | 6.795717626  | -5.648750115  |
| H278 | -0.304019596  | 4.580507581  | -4.591811275  |
| H279 | -3.282318870  | 6.185067737  | -3.452707179  |
| H280 | 0.691631054   | 8.627982975  | 3.635273768   |
| H281 | -0.345377472  | 9.728369570  | 0.810078697   |
| H282 | 0.069745994   | 12.556397170 | 1.331870886   |
| H283 | 2.234885991   | 9.169088442  | 2.937585443   |
| H284 | -2.410659216  | 10.529459172 | 2.353236513   |
| H285 | 5.130727226   | -2.442277511 | -9.060033441  |
| H286 | 5.008183443   | -3.972386729 | -8.169596972  |
| H287 | 8.120804065   | -4.974055712 | -4.999757977  |
| H288 | 5.605336538   | -4.422460061 | -10.442075080 |
| H289 | 4.045226158   | -4.892930515 | -10.281413778 |
| H290 | 5.601344344   | 4.735646751  | -0.329814213  |
| H291 | 5.792906575   | 7.273482858  | 1.404194247   |
| H292 | 5.129554624   | 8.291847034  | -2.691103603  |
| H293 | 4.202205778   | 5.531816083  | 0.452094416   |
| H294 | 6.956649176   | 7.937304114  | 0.467304176   |
| H295 | 5.866690790   | 3.167839541  | -6.296368846  |
| H296 | 6.209861640   | 6.833275263  | -1.467043208  |
| H297 | 4.942975361   | -7.460844429 | 4.773598975   |
| H298 | 6.799983394   | -8.199412358 | 2.446538877   |

|       |              |               |              |
|-------|--------------|---------------|--------------|
| H299  | 4.059222567  | 1.807956639   | -6.502579612 |
| H300  | 4.923676585  | -0.468147377  | 3.573144737  |
| H301  | 1.108345586  | 2.187018975   | -8.517737683 |
| H302  | -0.926744105 | -1.841023922  | -4.540169081 |
| H303  | 0.913603493  | 2.592462220   | -6.808403543 |
| H304  | 3.936871356  | -4.935912324  | 4.386502736  |
| H305  | 2.508186587  | 0.501722822   | -6.455847958 |
| H306  | 3.685787432  | -5.397796715  | 2.699113313  |
| H307  | 4.483813416  | -7.648420545  | 3.065243195  |
| H308  | 6.180336956  | -5.807714615  | 2.493903960  |
| H309  | 6.349278942  | -5.490329168  | 4.228272637  |
| H310  | -4.786807295 | -0.215231184  | -6.776632776 |
| H311  | 5.492724405  | -9.925053897  | 4.510383069  |
| H312  | 4.602767146  | -12.039960510 | 2.508795724  |
| H313  | 0.438187911  | 0.178171429   | -4.046527568 |
| H314  | 5.734647031  | -12.359694566 | 5.182751235  |
| H315  | 4.195014957  | -12.575289767 | 4.668081813  |
| H316  | 5.318747414  | -3.599660874  | 2.085713024  |
| H317  | -0.367628312 | 2.418871572   | -4.720044976 |
| H318  | -3.063579239 | -1.620206276  | -5.792905700 |
| H319  | 7.601750289  | -9.914626612  | -1.927304550 |
| H320  | 6.760802451  | -7.505542684  | -3.922116713 |
| H321  | 6.507619425  | -8.244223641  | -0.300485442 |
| H322  | 6.797792461  | -10.420488539 | -3.156891100 |
| H323  | 5.501030184  | 3.204587401   | -9.055444840 |
| H324  | 6.286262770  | -5.092831788  | -0.206340577 |
| H325  | 2.161355710  | -7.754425595  | 0.424185965  |
| H326  | 3.713155460  | -1.484511548  | -7.578494264 |
| H327  | 3.029100991  | -9.126779180  | -1.268394762 |
| H328  | 3.462225689  | -6.557357943  | -7.369490779 |
| H329  | 2.507004696  | -5.189445826  | -5.465314244 |
| H330  | 6.153802853  | -12.784631569 | 2.915503342  |
| H331  | 5.614516760  | -1.339006749  | 2.226975455  |
| H332  | 8.201081155  | -5.996613006  | 0.880076223  |
| H333  | 7.213451814  | -3.879358790  | 0.069495941  |
| H334  | 8.702500628  | -7.197161227  | 2.817703544  |
| H335  | 3.275359163  | -3.182908488  | 5.080694371  |
| H336  | 3.894870938  | -8.047145276  | -4.002923712 |
| H337  | 5.025519827  | -8.476552233  | -2.709755527 |
| H338  | 1.949089656  | -8.549848090  | -2.549797592 |
| H339  | 1.679652653  | -1.707654914  | -6.236442696 |
| H340  | -2.517974457 | 2.653470437   | -5.991433333 |
| H341  | -4.658426222 | 1.563694952   | -6.784720522 |
| H342  | 2.205215157  | -5.983275224  | 0.301438749  |
| H343  | 8.356564644  | -7.509910222  | 0.554857727  |
| H344  | 7.211734729  | -9.410781682  | 0.433241518  |
| H345  | 3.795410574  | -1.552837523  | 5.237330504  |
| H346  | 5.885355465  | -7.272294154  | -6.927767299 |
| H347  | 6.627236932  | -5.912915583  | -3.191956133 |
| H348  | 0.878166296  | -2.379963937  | -7.685084024 |
| H349  | 4.783168826  | 4.574407701   | -6.412386810 |
| H350  | 7.525905993  | -0.267470029  | 4.424677498  |
| H351  | 7.650868324  | 0.270764180   | 2.731391925  |
| H352  | 9.311448154  | -6.483012859  | -6.360292201 |
| H353  | 8.519738714  | -7.789107937  | -5.772851789 |
| H354  | 10.307412870 | -8.610615889  | -1.690912164 |
| H355  | 8.635186880  | -8.148888143  | -3.169636384 |
| H356  | 11.833006089 | -7.436750499  | -3.638718790 |
| H357  | 10.133015502 | -6.936409700  | -1.118367281 |
| H358  | 10.387344888 | 0.005831615   | 2.800215277  |
| H359  | -3.014864955 | 12.918812201  | 4.509920821  |
| H360  | 9.780584124  | -7.432354371  | 5.614542300  |
| H361  | 9.169875778  | -4.925517843  | 4.647368275  |
| H362  | -4.625352447 | 12.270816134  | 2.034920123  |
| H363  | -4.174282407 | 10.067792756  | 4.142702359  |
| H364  | -5.729157560 | 10.823869225  | 3.745292699  |
| H365  | 1.061542980  | -3.228848128  | -1.702156605 |
| H366  | 3.584683725  | -0.382679604  | 1.041575282  |
| H367  | -6.219049520 | 7.017337380   | -1.465443907 |
| H368  | 0.975242417  | -1.224737953  | 0.875271135  |
| H369  | -1.618708875 | -0.060887106  | -0.901028154 |
| Mo370 | 3.908750494  | -4.260121906  | -2.589453720 |
| N371  | -6.998554076 | -6.997517222  | -1.289278532 |
| N372  | -8.937739138 | -4.616264944  | 0.855763549  |
| N373  | -8.520161311 | -5.139395018  | 3.579456334  |
| N374  | -5.862870632 | -6.041748601  | 3.725917700  |
| N375  | -4.529160586 | -3.597755676  | 3.141151682  |
| N376  | -5.322449867 | -2.145104758  | 5.495465433  |
| N377  | -4.219783015 | -3.676939427  | 7.675359415  |
| N378  | -1.617701895 | -4.924995958  | 7.118106881  |

|      |              |               |               |
|------|--------------|---------------|---------------|
| N379 | -0.194589193 | -2.933944507  | 5.937949580   |
| N380 | -0.799498366 | -0.059763239  | 6.742879441   |
| N381 | -1.288132343 | -0.485079338  | 9.578930136   |
| N382 | 5.011886348  | -11.970024448 | 4.573209224   |
| N383 | 6.025097239  | -9.664805969  | 3.673539099   |
| N384 | 4.785139263  | -3.639538377  | 2.958265367   |
| N385 | 3.955270468  | -2.461692507  | 4.810112725   |
| N386 | 5.149313995  | -1.362703071  | 3.147098991   |
| N387 | 8.712427817  | -7.389961331  | 3.843483280   |
| N388 | -5.680409553 | -2.614532855  | -3.490707100  |
| N389 | -1.796432327 | -5.300357790  | -3.727092175  |
| N390 | -5.921081657 | -0.177032606  | -2.573494587  |
| N391 | -8.253226665 | 0.873441835   | -1.428811647  |
| N392 | -7.944026239 | 0.358635830   | 1.316749487   |
| N393 | -5.791903627 | 2.001221164   | 2.046000915   |
| N394 | -2.979214302 | 2.765713136   | -1.105865979  |
| N395 | -2.230672696 | 0.767488632   | -0.769774919  |
| N396 | -6.419318705 | 4.605888999   | 2.801030157   |
| N397 | -9.754987169 | 7.758124678   | 1.596879470   |
| N398 | -9.676541169 | 9.440635226   | 3.041437363   |
| N399 | 9.336108179  | 2.339180174   | 3.175291935   |
| N400 | 6.400561027  | 7.087448356   | 0.599511064   |
| N401 | 4.485143953  | 8.606594672   | -1.970887412  |
| N402 | 1.851329187  | 8.049552562   | -2.656892207  |
| N403 | -2.810080534 | 6.763550629   | -4.171192969  |
| N404 | -2.890208619 | 8.715817401   | -5.461756615  |
| N405 | -4.075672293 | 8.582906409   | -3.475369011  |
| N406 | 0.809205060  | 6.385195748   | -0.570282315  |
| N407 | 0.995495287  | 8.093599901   | 1.639119799   |
| N408 | -0.272000612 | 10.534869489  | 1.430052492   |
| N409 | -1.565483526 | 10.588225718  | -2.376875011  |
| N410 | -2.698740227 | 11.504054928  | 2.389089088   |
| N411 | 4.654415144  | -4.070050992  | -10.311031105 |
| N412 | 2.906544085  | -2.019030930  | -7.910783513  |
| N413 | 1.862021021  | 0.754553537   | -7.223026668  |
| N414 | 3.972091460  | 2.700144980   | -6.997383230  |
| N415 | -1.120572754 | -2.220932076  | -10.358049772 |
| N416 | -2.750657551 | -0.485707650  | -8.763806669  |
| N417 | 8.410970329  | -6.792183906  | -5.983600920  |
| N418 | 4.450297918  | -5.450915736  | -4.560237321  |
| N419 | 3.997249032  | -6.287010560  | -6.548898154  |
| N420 | 9.306315024  | -7.388290883  | -3.030142732  |
| N421 | 0.189981776  | 2.247857207   | 0.234479748   |
| N422 | 2.626967922  | -0.444215367  | 0.651267782   |
| N423 | 1.029324844  | 1.633526644   | -0.197928072  |
| N424 | 1.896949787  | -1.158134124  | 1.368922039   |
| O425 | -6.710459247 | -5.096794982  | 0.862726923   |
| O426 | -7.656096676 | -3.042961440  | 3.844988554   |
| O427 | -5.870232509 | -5.598138524  | 5.968439296   |
| O428 | -2.876925306 | -4.344304690  | 4.520893230   |
| O429 | -3.413110159 | -0.946363634  | 5.240167103   |
| O430 | -3.858713369 | -1.662666073  | 8.703138859   |
| O431 | -1.199341359 | -4.730558477  | 9.364160131   |
| O432 | 1.727603863  | -4.199589850  | 5.808413330   |
| O433 | 1.485220586  | -0.204832744  | 6.732260158   |
| O434 | 0.272339547  | 1.140777781   | 9.858418476   |
| O435 | 0.756685005  | -1.223935361  | 12.430505878  |
| O436 | 6.799448055  | -10.596533192 | 1.703814989   |
| O437 | 7.586129558  | -8.270627416  | 5.645367757   |
| O438 | 11.188688958 | -5.020382141  | 4.916203182   |
| O439 | -5.640505734 | -0.754798982  | -0.370276981  |
| O440 | -3.473385378 | -4.013901653  | -4.566197595  |
| O441 | -7.040982395 | 2.654578615   | -0.669645052  |
| O442 | -6.066462131 | 3.383943048   | -3.525170441  |
| O443 | -9.851781041 | 1.555898639   | 1.761639650   |
| O444 | -5.850262613 | 1.218380636   | 4.191755755   |
| O445 | -4.393521497 | 4.818014472   | 3.834056597   |
| O446 | -6.766139211 | 6.933375989   | 5.447522686   |
| O447 | 10.511326408 | -0.587004433  | 4.749595925   |
| O448 | 3.394902325  | 4.353001877   | 4.488913145   |
| O449 | 3.752059744  | 8.326120986   | 0.170234957   |
| O450 | 1.318134584  | 10.286848373  | -2.734742782  |
| O451 | -1.241760503 | 7.229197542   | -1.123850979  |
| O452 | -0.759518301 | 6.976953685   | 2.610713735   |
| O453 | 2.425278254  | 5.533809196   | 1.989592417   |
| O454 | 0.870708195  | 11.364742558  | 3.237680086   |
| O455 | -2.338608153 | 13.558138428  | 1.464290492   |
| O456 | -3.023437724 | 11.151056185  | -0.708790565  |
| O457 | -4.971232096 | 13.482111020  | 4.340561110   |
| O458 | -5.293081959 | 7.007699872   | -1.154206633  |

|      |              |               |              |
|------|--------------|---------------|--------------|
| O459 | 2.230466886  | -3.948150862  | -8.956421510 |
| O460 | 0.241564234  | -0.097447834  | -8.601980979 |
| O461 | 2.697617057  | 4.185168420   | -8.151694400 |
| O462 | 6.366648244  | 4.956096546   | -8.464395075 |
| O463 | -4.466562679 | -1.893489919  | -9.286901905 |
| O464 | -1.177917397 | -6.131344632  | -6.573679531 |
| O465 | 0.793206367  | -5.262454750  | -7.152648741 |
| O466 | -3.407804987 | 3.011918905   | -8.470368237 |
| O467 | 10.065956632 | -5.300568513  | -3.482268640 |
| O468 | 12.657227955 | -6.962430161  | -1.830769302 |
| O469 | 0.303516046  | -6.141496972  | -1.780073328 |
| O470 | -0.365621160 | -7.337723628  | 0.003981412  |
| O471 | 5.192860272  | -10.718064304 | -3.778367489 |
| O472 | 2.935959117  | -10.690449521 | -3.917199909 |
| O473 | 5.070961219  | -5.737719226  | -1.452568357 |
| O474 | 4.917216849  | -7.509288052  | -0.079085360 |
| O475 | 2.653721519  | -5.975645128  | -2.404016501 |
| O476 | 8.775392348  | -6.774786813  | 1.082984071  |
| O477 | 6.868255098  | -4.689262663  | 0.489068794  |
| O478 | -4.154925685 | 4.977191889   | -2.378354446 |
| O479 | 7.734272134  | -10.345134698 | -2.801211421 |
| O480 | 7.371787970  | -8.734232838  | -0.273063930 |
| S481 | 3.784373062  | 5.147340958   | -1.908701636 |
| S482 | 2.162347857  | 1.887478926   | -3.021408065 |
| S483 | 2.248567551  | -3.130428248  | -3.863073925 |
| S484 | 4.019263671  | 1.938931859   | 0.044158523  |
| S485 | 0.578367390  | -0.874903236  | -1.480144246 |
| S486 | 4.310774204  | -0.388760107  | -5.376025267 |
| S487 | 3.279188928  | -3.455651485  | -0.438282656 |
| S488 | 5.770977988  | 1.914505324   | -2.822272868 |
| S489 | 5.815655106  | -2.945431139  | -3.047939101 |
| S490 | 6.198229007  | -0.924558668  | 0.030322854  |
| end  |              |               |              |

## N2-ready-b to Fe2-brNH-NH-Fe6

Figure 8, scheme C

| reactant <b>N2-ready-b</b> (S=3/2) | <b>bm52capexp347tf.car_6</b> |              |               |              |
|------------------------------------|------------------------------|--------------|---------------|--------------|
| Fe( 139) 2.323                     | C1                           | -7.734132254 | -5.365012870  | 1.276604324  |
| Fe( 140) 0.829                     | C2                           | -8.135095861 | -6.509447875  | 0.337697222  |
| Fe( 141) 1.454                     | C3                           | -8.542266679 | -3.434833417  | 2.564909518  |
| Fe( 142) -2.433                    | C4                           | -7.904586471 | -3.695017532  | 3.925772290  |
| Fe( 143) 2.902                     | C5                           | -7.472554345 | -5.284144170  | 5.734509489  |
| Fe( 144) -0.986                    | C6                           | -5.947916775 | -5.405031596  | 5.666779587  |
| Fe( 145) -1.531                    | C7                           | -3.974526188 | -5.711226394  | 4.272326340  |
|                                    | C8                           | -3.463373429 | -4.269210762  | 4.307144548  |
|                                    | C9                           | -3.885620162 | -1.950437432  | 3.606634116  |
|                                    | C10                          | -3.901796370 | -1.318888201  | 5.007921171  |
|                                    | C11                          | -4.919983835 | -1.157099533  | 7.188735644  |
|                                    | C12                          | -3.858294284 | -1.708688511  | 8.151596358  |
|                                    | C13                          | -2.853486602 | -3.724262863  | 9.129149260  |
|                                    | C14                          | -1.385905188 | -4.041750987  | 8.806375371  |
|                                    | C15                          | 0.241012621  | -4.801885830  | 7.120788103  |
|                                    | C16                          | 0.982416258  | -3.653212613  | 6.426467315  |
|                                    | C17                          | 0.644416790  | -1.415925815  | 5.389442684  |
|                                    | C18                          | 0.775525275  | -0.201278523  | 6.324885437  |
|                                    | C19                          | -0.264658075 | -1.208764723  | 4.160292876  |
|                                    | C20                          | -0.036905604 | 0.146219692   | 3.472912911  |
|                                    | C21                          | -0.136328042 | -2.410321624  | 3.213774049  |
|                                    | C22                          | -0.357769944 | 1.551163263   | 7.617731148  |
|                                    | C23                          | 0.008562942  | 1.227270525   | 9.077618505  |
|                                    | C24                          | -1.686391070 | 2.332687168   | 7.481501753  |
|                                    | C25                          | -1.751986824 | 3.500047822   | 8.471891701  |
|                                    | C26                          | -1.865845570 | 2.842350687   | 6.044621656  |
|                                    | C27                          | -0.404814848 | -0.087708881  | 11.070366157 |
|                                    | C28                          | 1.060151879  | -0.355847498  | 11.351400638 |
|                                    | C29                          | 5.897438758  | -11.599477165 | 3.752826448  |
|                                    | C30                          | 6.515109272  | -10.322149756 | 3.194306265  |
|                                    | C31                          | 6.786739860  | -7.895604748  | 3.681069787  |
|                                    | C32                          | 8.007947931  | -7.501893869  | 4.531792055  |
|                                    | C33                          | 5.607863757  | -6.938593258  | 3.920726303  |
|                                    | C34                          | 5.942207087  | -5.497114713  | 3.547990804  |
|                                    | C35                          | 4.698287110  | -4.614084078  | 3.497846122  |
|                                    | C36                          | 4.896158159  | -2.113339938  | 3.511592423  |
|                                    | C37                          | 10.268917503 | -6.559342420  | 4.484984470  |
|                                    | C38                          | 10.493878240 | -5.064815543  | 4.471899230  |
|                                    | C39                          | -5.329820364 | -2.675253566  | -1.562613377 |

|      |               |              |              |
|------|---------------|--------------|--------------|
| C40  | -5.692860319  | -1.241572292 | -1.128322278 |
| C41  | -3.791583510  | -2.821571234 | -1.504547471 |
| C42  | -3.244071881  | -4.259171157 | -1.621370396 |
| C43  | -2.976988784  | -4.746658587 | -3.046282312 |
| C44  | -6.183862568  | 0.997988729  | -2.033538777 |
| C45  | -7.273827425  | 1.452982777  | -1.052564252 |
| C46  | -6.361075868  | 1.606883985  | -3.430021444 |
| C47  | -9.427898140  | 0.930348014  | -0.006368156 |
| C48  | -9.030699668  | 0.950428247  | 1.472806420  |
| C49  | -7.325362296  | 0.439000544  | 3.155712533  |
| C50  | -6.155049882  | 1.401097318  | 3.366966910  |
| C51  | -4.605098204  | 3.045594005  | 2.433939223  |
| C52  | -5.046854949  | 4.354197080  | 3.130952169  |
| C53  | -4.020209484  | 3.480098665  | 1.081377156  |
| C54  | -3.402965453  | 2.417824599  | 0.234845671  |
| C55  | -2.981172767  | 1.133960065  | 0.469933970  |
| C56  | -2.547690903  | 1.605324815  | -1.665338245 |
| C57  | -6.849273214  | 6.033666756  | 3.239678770  |
| C58  | -6.755909664  | 6.189682711  | 4.756428035  |
| C59  | -8.322537089  | 6.088922064  | 2.772004571  |
| C60  | -8.945267436  | 7.449626443  | 2.657513575  |
| C61  | -8.871846814  | 8.553007491  | 3.485323793  |
| C62  | -10.198693907 | 8.969697737  | 1.760179309  |
| C63  | 9.237686775   | 1.628910296  | 3.433849452  |
| C64  | 10.269303793  | 0.527581377  | 3.265961846  |
| C65  | 7.845389819   | 0.982658597  | 3.250750780  |
| C66  | 6.709668151   | 1.956636238  | 3.461767442  |
| C67  | 6.139784088   | 2.155645915  | 4.731869500  |
| C68  | 6.191397600   | 2.699411147  | 2.385384554  |
| C69  | 5.087851758   | 3.059368520  | 4.924798834  |
| C70  | 5.156803308   | 3.617619937  | 2.564950327  |
| C71  | 4.598311884   | 3.789521948  | 3.834032190  |
| C72  | 5.383191279   | 6.858685926  | -1.385085721 |
| C73  | 4.324989542   | 7.959208293  | -1.597045966 |
| C74  | 4.698852697   | 5.531125550  | -1.098262093 |
| C75  | 3.314160314   | 9.544044228  | -3.201954322 |
| C76  | 1.839594791   | 9.161968384  | -3.365236751 |
| C77  | 0.216065770   | 7.270657545  | -3.328513642 |
| C78  | -0.253169829  | 6.927332490  | -1.890722879 |
| C79  | 0.245003373   | 6.024673038  | -4.242902343 |
| C80  | -1.008079362  | 5.147104815  | -4.349479383 |
| C81  | -2.152316458  | 5.682633518  | -5.226592316 |
| C82  | -3.673260666  | 7.602827886  | -4.743899390 |
| C83  | 0.268942385   | 5.982485670  | 0.306372589  |
| C84  | 0.115119622   | 7.202671269  | 1.225957410  |
| C85  | 1.265350621   | 5.013469963  | 0.975877320  |
| C86  | 1.199353237   | 9.267336187  | 1.966153954  |
| C87  | 0.555887218   | 10.610767544 | 1.657731085  |
| C88  | -0.855685449  | 11.875464793 | 0.127184267  |
| C89  | -2.130072045  | 12.430592283 | 0.810150004  |
| C90  | -1.016197506  | 11.883580059 | -1.395343550 |
| C91  | -2.159569859  | 11.012427401 | -1.899336108 |
| C92  | -4.073956176  | 11.948219387 | 2.222095369  |
| C93  | -3.987108932  | 13.049918640 | 3.270989674  |
| C94  | -4.731361174  | 10.680565451 | 2.835046187  |
| C95  | -4.972190027  | 9.607000122  | 1.798443365  |
| C96  | -6.154531881  | 9.602678048  | 1.042679860  |
| C97  | -4.006061335  | 8.626393081  | 1.520663033  |
| C98  | -6.360069336  | 8.666298447  | 0.028020718  |
| C99  | -4.182222166  | 7.697152038  | 0.490687385  |
| C100 | -5.359638504  | 7.734431240  | -0.250435150 |
| C101 | 4.086761212   | -3.979197898 | -8.998739705 |
| C102 | 2.660105600   | -3.726271740 | -8.544102819 |
| C103 | 1.204285542   | -2.191311682 | -7.242924338 |
| C104 | 0.707097328   | -0.834022967 | -7.754558396 |
| C105 | 1.122611543   | 1.587715882  | -7.711900278 |
| C106 | 2.296165926   | 2.542446861  | -7.913440391 |
| C107 | 4.575760538   | 3.213399525  | -7.404814295 |
| C108 | 5.169628498   | 3.373799853  | -8.789356960 |
| C109 | -2.761123087  | -3.492841836 | -9.150223984 |
| C110 | -3.787153112  | -2.402996715 | -8.816533210 |
| C111 | -2.270604897  | -4.170100407 | -7.849189053 |
| C112 | -1.538112897  | -5.490303357 | -8.150473374 |
| C113 | -0.860099292  | -6.019182701 | -6.906957997 |
| C114 | -4.191700907  | -0.084983649 | -8.157008905 |
| C115 | -3.713913388  | 1.199562033  | -8.804585987 |
| C116 | -4.569408299  | 0.045820740  | -6.660166883 |
| C117 | -3.334177572  | 0.058411715  | -5.805593412 |
| C118 | -2.607642526  | 1.245799583  | -5.610187954 |
| C119 | -2.798045732  | -1.153073672 | -5.339158204 |

|       |              |               |              |
|-------|--------------|---------------|--------------|
| C120  | -1.328521151 | 1.199621888   | -5.046967464 |
| C121  | -1.520808387 | -1.197900945  | -4.774076507 |
| C122  | -0.769255634 | -0.024008926  | -4.667636959 |
| C123  | 7.914975220  | -6.235921298  | -4.770929301 |
| C124  | 9.096912089  | -6.322801127  | -3.794110912 |
| C125  | 6.602924794  | -6.605129414  | -4.066380631 |
| C126  | 5.351455459  | -6.397397417  | -4.853830250 |
| C127  | 4.996199944  | -6.986501931  | -6.050137220 |
| C128  | 3.261911801  | -5.876922584  | -5.238666527 |
| C129  | 10.307927783 | -7.550477505  | -2.093392706 |
| C130  | 11.658760312 | -7.321966256  | -2.734924833 |
| C131  | 0.601453562  | -6.925198813  | -0.196784370 |
| C132  | 2.092256707  | -6.968840807  | 0.121029270  |
| C133  | 3.011757127  | -7.093483184  | -1.132748949 |
| C134  | 2.921335994  | -8.534682529  | -1.700373720 |
| C135  | 3.954494311  | -8.875327210  | -2.776732727 |
| C136  | 3.978834253  | -10.365132834 | -3.179894983 |
| C137  | 4.467741997  | -6.827072245  | -0.710496413 |
| C138  | 3.588716262  | -0.695288962  | -2.229729898 |
| Fe139 | 3.876336923  | -2.025436924  | -3.720688680 |
| Fe140 | 2.222662579  | 0.818331092   | -1.518946186 |
| Fe141 | 5.015746138  | 0.430307490   | -1.635596709 |
| Fe142 | 3.798116639  | 0.516151440   | -3.838420559 |
| Fe143 | 3.791597206  | 2.786236903   | -2.488509547 |
| Fe144 | 4.680500200  | -2.055097214  | -1.277713957 |
| Fe145 | 2.163085956  | -2.417726232  | -1.752547046 |
| H146  | -6.370108375 | -7.533002531  | 0.332357210  |
| H147  | -6.548548847 | -6.539547393  | -0.950245677 |
| H148  | -9.705256833 | -4.783381044  | 1.389267487  |
| H149  | -8.851849077 | -6.119634962  | -0.403014371 |
| H150  | -8.695405760 | -7.239201765  | 0.947302023  |
| H151  | -7.881923365 | -2.727636826  | 2.041847003  |
| H152  | -8.655826823 | -5.599457795  | 3.964906408  |
| H153  | -9.506458834 | -2.935170931  | 2.727607164  |
| H154  | -7.891098246 | -6.243308434  | 6.065691684  |
| H155  | -6.014987045 | -5.841236180  | 3.651954463  |
| H156  | -7.691449498 | -4.531291041  | 6.502798451  |
| H157  | -2.889721536 | -1.761117121  | 3.185100487  |
| H158  | -4.977665544 | -3.701489760  | 3.034493242  |
| H159  | -3.732824791 | -6.171849720  | 3.305123593  |
| H160  | -4.768889694 | -0.071044817  | 7.136447001  |
| H161  | -5.653834117 | -2.290225737  | 5.503390768  |
| H162  | -3.452931733 | -6.263996653  | 5.062238776  |
| H163  | -4.624725731 | -1.445961449  | 2.968197441  |
| H164  | -4.207383828 | -3.622517121  | 7.474281657  |
| H165  | -5.911867954 | -1.354459356  | 7.619088368  |
| H166  | -0.522110707 | -3.325640622  | 3.681474709  |
| H167  | -0.699470669 | -2.247238147  | 2.281522634  |
| H168  | 0.909218729  | -2.589797995  | 2.927849769  |
| H169  | -1.292923914 | -1.189789340  | 4.542104244  |
| H170  | -3.352018340 | -4.672259716  | 9.380852146  |
| H171  | -1.870748782 | 2.025428246   | 5.311075858  |
| H172  | -1.449541786 | -0.255165337  | 9.215969032  |
| H173  | -1.706970700 | 3.166176932   | 9.518264033  |
| H174  | 0.757817255  | 0.110285263   | 2.728176054  |
| H175  | 0.224455283  | 0.942382578   | 4.184321632  |
| H176  | 9.311671102  | 1.987601663   | 4.478578296  |
| H177  | -2.821048703 | 3.378057612   | 5.946362357  |
| H178  | -2.693760729 | 4.050239947   | 8.330755294  |
| H179  | -1.055180928 | 3.542575121   | 5.783228559  |
| H180  | -0.919389346 | 4.201465116   | 8.303423709  |
| H181  | -2.510642858 | 1.633416672   | 7.712312273  |
| H182  | 0.469708383  | 2.186661609   | 7.267026039  |
| H183  | -1.279100378 | 0.037068529   | 6.403079767  |
| H184  | -0.957201232 | 0.466111569   | 2.960423220  |
| H185  | 1.557794621  | 4.248956254   | 0.242217907  |
| H186  | 0.730054169  | 4.519308174   | 1.799920918  |
| H187  | 2.665700649  | 5.321491900   | 2.329383862  |
| H188  | 3.214132007  | 4.680580239   | 4.864476315  |
| H189  | 4.759762351  | 4.177736904   | 1.718232975  |
| H190  | 6.589183005  | 2.540220866   | 1.380413537  |
| H191  | 6.514606125  | 1.588784688   | 5.588798281  |
| H192  | -0.789782738 | -2.680707952  | 6.314305877  |
| H193  | 0.220010076  | -5.650388128  | 6.421877116  |
| H194  | 0.833322036  | -5.100194341  | 7.994946250  |
| H195  | -1.855537935 | -4.538997676  | 6.840400642  |
| H196  | -2.836696628 | -3.093945609  | 10.026206782 |
| H197  | 4.645178428  | 3.188928772   | 5.916405760  |
| H198  | 1.670165437  | -1.623686683  | 5.061824106  |
| H199  | -0.750692759 | 0.717122935   | 11.739474441 |

|      |               |              |               |
|------|---------------|--------------|---------------|
| H200 | -0.957585835  | -1.003529806 | 11.330958664  |
| H201 | 1.649398263   | -0.728841654 | 10.481865329  |
| H202 | 11.143243622  | -7.060119971 | 4.042069202   |
| H203 | -1.753528603  | -5.984933742 | -4.123916350  |
| H204 | 1.241612940   | -6.065216176 | -1.805170829  |
| H205 | -2.268888078  | -6.240824620 | -8.485128197  |
| H206 | -0.802366869  | -5.342199866 | -8.953983117  |
| H207 | -3.121986586  | -4.377215219 | -7.182292988  |
| H208 | -3.109453652  | 1.047398843  | -9.729863709  |
| H209 | -3.348899848  | -4.237815876 | -9.708160442  |
| H210 | -3.349752386  | -2.193930269 | -2.297161902  |
| H211 | -3.950740254  | -4.971949038 | -1.162695010  |
| H212 | -2.279314031  | -1.026650431 | -8.428005352  |
| H213 | -5.130657996  | -0.319821620 | -8.700603991  |
| H214 | -1.039895919  | -2.403270159 | -9.564228203  |
| H215 | -1.318593246  | -5.851022320 | -2.423405933  |
| H216 | -1.613527402  | -3.471314121 | -7.307931804  |
| H217 | -1.210037610  | -3.770401836 | -10.466589027 |
| H218 | -6.739894408  | -3.458688420 | -2.853214958  |
| H219 | -3.464825512  | -2.414975519 | -0.535702085  |
| H220 | 0.831553624   | -5.290990469 | -7.589031153  |
| H221 | -2.317467562  | -4.340271980 | -1.034974613  |
| H222 | -3.831702692  | 2.605613479  | 3.079375548   |
| H223 | -3.016645194  | 0.523686127  | 1.363177043   |
| H224 | -8.139921298  | 0.779831264  | 3.809460270   |
| H225 | -7.263967746  | -0.073101237 | 1.083316459   |
| H226 | -6.928999047  | 4.082481369  | 2.361327466   |
| H227 | -8.325181758  | 8.742316894  | 4.401625676   |
| H228 | -6.907725894  | 5.234236485  | 5.315752152   |
| H229 | -8.930493947  | 5.431509353  | 3.419011481   |
| H230 | -6.266302175  | 6.837883970  | 2.763949807   |
| H231 | -10.875071173 | 9.517915148  | 1.110140313   |
| H232 | -3.259298719  | 4.248537108  | 1.292228420   |
| H233 | -4.813396977  | 3.970349090  | 0.494272182   |
| H234 | -9.835270441  | 10.447667040 | 3.250136432   |
| H235 | -8.360260050  | 5.647428421  | 1.763480782   |
| H236 | -6.173381900  | 2.015352485  | 1.375568463   |
| H237 | -7.018005248  | -0.551381003 | 3.523466891   |
| H238 | -9.871673876  | 1.913900871  | -0.215313513  |
| H239 | -2.205334134  | 1.505556436  | -2.693082581  |
| H240 | -10.212089415 | 0.174699341  | -0.143892716  |
| H241 | 10.297668266  | 3.214054909  | 2.687169062   |
| H242 | 8.690116418   | 3.315169691  | 2.412311521   |
| H243 | 1.554286960   | 5.989011630  | -1.430900002  |
| H244 | -0.715914117  | 5.494138574  | 0.278802977   |
| H245 | 1.734947298   | 8.069534251  | 0.308708446   |
| H246 | -3.435522374  | 3.543414277  | -1.608842997  |
| H247 | -5.111367255  | 4.158521897  | -2.786004794  |
| H248 | -6.710586643  | 3.392898280  | -4.162947612  |
| H249 | -4.796453477  | 5.409375029  | -1.851220661  |
| H250 | -5.536263025  | 1.249199120  | -4.068115541  |
| H251 | -7.316820690  | 1.276998339  | -3.865330568  |
| H252 | -0.062242722  | 11.614029697 | -1.869586994  |
| H253 | -1.252059850  | 12.918859364 | -1.687701336  |
| H254 | -0.909492632  | 10.171478018 | -3.320942117  |
| H255 | -2.583622453  | 9.616353530  | -3.289585748  |
| H256 | -3.681398308  | 9.204582112  | -6.027434988  |
| H257 | -2.646946364  | 4.849719047  | -5.749060270  |
| H258 | -7.292595025  | 8.666074689  | -0.542439791  |
| H259 | -3.090645697  | 8.564373455  | 2.114442280   |
| H260 | -4.698004508  | 7.766313906  | -2.963327929  |
| H261 | 1.064917517   | 5.379876350  | -3.888302561  |
| H262 | 2.344307729   | 7.189594368  | -3.219185352  |
| H263 | -1.391803215  | 4.883406231  | -3.351642539  |
| H264 | -8.366340394  | -0.219566338 | -1.477714492  |
| H265 | 3.646377695   | 10.004391032 | -4.142106393  |
| H266 | -6.094306217  | -0.954868216 | -3.059969298  |
| H267 | 0.537359736   | 6.362530829  | -5.250644436  |
| H268 | -3.390256950  | 6.986302654  | 0.251169612   |
| H269 | 3.342261111   | 10.317069733 | -2.420623761  |
| H270 | -2.933921753  | 7.775441767  | -6.662986224  |
| H271 | -5.102223542  | 8.947694174  | -4.163847683  |
| H272 | -5.173343100  | -3.518063469 | -3.435743653  |
| H273 | -5.758370111  | -3.336333666 | -0.786573294  |
| H274 | -6.936005810  | 10.337041360 | 1.251387743   |
| H275 | -5.255620791  | 1.391629602  | -1.595505528  |
| H276 | -0.482917275  | 8.025404482  | -3.701586893  |
| H277 | -1.737135809  | 6.342301992  | -5.998832133  |
| H278 | -0.675736284  | 4.204611370  | -4.806679569  |
| H279 | -3.600672491  | 5.871060536  | -3.677353830  |



|      |              |               |               |
|------|--------------|---------------|---------------|
| H280 | 0.809983919  | 8.928943446   | 2.938000501   |
| H281 | -0.459002870 | 9.759954457   | 0.098563917   |
| H282 | -0.089037383 | 12.625793359  | 0.375195304   |
| H283 | 2.277748454  | 9.445622383   | 2.071877320   |
| H284 | -2.445580022 | 10.650775954  | 1.729587584   |
| H285 | 4.606680398  | -3.021548275  | -9.146735517  |
| H286 | 4.585851689  | -4.482931217  | -8.143519709  |
| H287 | 7.872602586  | -5.180014797  | -5.076947712  |
| H288 | 5.048126918  | -5.085614490  | -10.412756487 |
| H289 | 3.510284555  | -5.573286565  | -10.124122727 |
| H290 | 5.466682107  | 4.758510109   | -0.972449698  |
| H291 | 5.727504982  | 7.442320203   | 0.543829885   |
| H292 | 4.825793295  | 8.083993158   | -3.587093679  |
| H293 | 4.100586947  | 5.605621503   | -0.180107165  |
| H294 | 6.810887275  | 8.052453980   | -0.514488032  |
| H295 | 5.377187343  | 2.863039429   | -6.736798192  |
| H296 | 5.991842430  | 6.757859346   | -2.297302574  |
| H297 | 5.298598175  | -7.007062793  | 4.976891794   |
| H298 | 7.052740462  | -7.881095696  | 2.616267017   |
| H299 | 3.633650208  | 1.400495130   | -6.786983973  |
| H300 | 5.143820759  | -0.098005707  | 3.230958763   |
| H301 | 0.557065026  | 1.554662600   | -8.651250991  |
| H302 | -1.101513111 | -2.148568266  | -4.436344555  |
| H303 | 0.465361376  | 2.062473168   | -6.962229931  |
| H304 | 4.265826111  | -4.489650086  | 4.497467867   |
| H305 | 2.135485067  | 0.030995940   | -6.592214486  |
| H306 | 3.924847844  | -5.077134890  | 2.864546647   |
| H307 | 4.769503908  | -7.298374335  | 3.302816120   |
| H308 | 6.415745554  | -5.477959615  | 2.555429778   |
| H309 | 6.662824359  | -5.062835032  | 4.258597509   |
| H310 | -5.215230408 | -0.805714270  | -6.401759732  |
| H311 | 5.927315185  | -9.454776118  | 4.898063561   |
| H312 | 4.985580267  | -11.777405613 | 3.162572277   |
| H313 | 0.245403483  | -0.043813415  | -4.278279896  |
| H314 | 6.329091831  | -11.788676759 | 5.757480407   |
| H315 | 4.772635628  | -12.139015417 | 5.389669000   |
| H316 | 5.524548205  | -3.340675547  | 2.032226436   |
| H317 | -0.744013772 | 2.111620960   | -4.914334356  |
| H318 | -3.371442831 | -2.076591540  | -5.443574114  |
| H319 | 7.621784007  | -9.938440780  | -1.668589638  |
| H320 | 6.635246842  | -7.669604437  | -3.777159087  |
| H321 | 6.624244566  | -8.179361146  | -0.104758487  |
| H322 | 6.758480361  | -10.542051865 | -2.814292982  |
| H323 | 4.943639785  | 2.542115983   | -9.498915908  |
| H324 | 6.348989282  | -5.057615138  | -0.215980777  |
| H325 | 2.287436627  | -7.785554471  | 0.827066854   |
| H326 | 3.278926083  | -2.017328339  | -7.601961058  |
| H327 | 3.050186771  | -9.221602845  | -0.848908073  |
| H328 | 3.096182403  | -6.959834528  | -7.039057022  |
| H329 | 2.249153395  | -5.506964303  | -5.152078602  |
| H330 | 6.594069624  | -12.421313622 | 3.514627777   |
| H331 | 5.758680909  | -1.074605790  | 1.941219304   |
| H332 | 8.363166932  | -5.802190927  | 0.795428289   |
| H333 | 7.232893061  | -3.786590479  | -0.137129341  |
| H334 | 8.973531686  | -6.855134431  | 2.797414549   |
| H335 | 3.720909254  | -2.709304602  | 5.136336750   |
| H336 | 3.743326718  | -8.289952589  | -3.684698873  |
| H337 | 4.962914332  | -8.595202325  | -2.443197749  |
| H338 | 1.903983843  | -8.691139350  | -2.091152235  |
| H339 | 1.338901958  | -2.161597345  | -6.149639759  |
| H340 | -3.029839962 | 2.194354144   | -5.950409586  |
| H341 | -5.153566498 | 0.972071593   | -6.553237238  |
| H342 | 2.316247830  | -6.020909685  | 0.638736291   |
| H343 | 8.506577654  | -7.336867313  | 0.582794386   |
| H344 | 7.407974161  | -9.256135795  | 0.675790487   |
| H345 | 4.162381478  | -1.041300632  | 5.094770150   |
| H346 | 5.558463666  | -7.618846792  | -6.725341032  |
| H347 | 6.528781458  | -6.041641905  | -3.128664946  |
| H348 | 0.455777948  | -2.945663683  | -7.493250506  |
| H349 | 4.246961837  | 4.197962915   | -7.039038262  |
| H350 | 7.765972327  | 0.149657560   | 3.964733300   |
| H351 | 7.796880051  | 0.560790035   | 2.234571051   |
| H352 | 8.997031086  | -6.735475216  | -6.440168339  |
| H353 | 8.269579905  | -8.023173935  | -5.738227267  |
| H354 | 10.307162062 | -8.571821122  | -1.681864683  |
| H355 | 8.553900023  | -8.229784704  | -3.098717352  |
| H356 | 11.699367400 | -7.550391624  | -3.827329248  |
| H357 | 10.174344362 | -6.855544761  | -1.248956272  |
| H358 | 10.544482350 | 0.316109125   | 2.204310828   |
| H359 | -2.978342818 | 13.194087223  | 3.724567171   |

|       |              |               |               |
|-------|--------------|---------------|---------------|
| H360  | 10.202836583 | -6.867650261  | 5.543407671   |
| H361  | 9.568131932  | -4.444765306  | 4.391763229   |
| H362  | -4.711585076 | 12.321055776  | 1.403147783   |
| H363  | -4.090203920 | 10.301018781  | 3.646063706   |
| H364  | -5.681885547 | 10.995245646  | 3.289595401   |
| H365  | 1.089117796  | -3.227609340  | -1.028340495  |
| H366  | 4.387534249  | -1.536404524  | 0.084026807   |
| H367  | -6.454854748 | 6.805725569   | -1.567471775  |
| H368  | 0.102261590  | -0.953739253  | -0.540547641  |
| H369  | -2.015541639 | -0.243430412  | -0.871194992  |
| M0370 | 3.846050045  | -4.400884148  | -2.432238646  |
| N371  | -7.054218978 | -7.193255413  | -0.347932514  |
| N372  | -8.772224574 | -4.624006281  | 1.761575979   |
| N373  | -8.095701126 | -4.918745939  | 4.472336017   |
| N374  | -5.415403380 | -5.778984388  | 4.476228729   |
| N375  | -4.188244191 | -3.373564404  | 3.588092552   |
| N376  | -4.871530606 | -1.732211895  | 5.855825230   |
| N377  | -3.639170540 | -3.049373031  | 8.103863834   |
| N378  | -1.115268895 | -4.492026826  | 7.546607833   |
| N379  | 0.208514187  | -2.583222454  | 6.139111841   |
| N380  | -0.381875465 | 0.349373004   | 6.782077290   |
| N381  | -0.656672954 | 0.204050925   | 9.671608608   |
| N382  | 5.539704892  | -11.500122054 | 5.174690278   |
| N383  | 6.381948599  | -9.252583175  | 4.001537629   |
| N384  | 5.031998225  | -3.307060063  | 2.928599388   |
| N385  | 4.285817810  | -1.971768243  | 4.705386538   |
| N386  | 5.399195869  | -1.024271447  | 2.900951614   |
| N387  | 9.039172569  | -6.963910531  | 3.833712367   |
| N388  | -5.857003525 | -2.946773208  | -2.905007139  |
| N389  | -1.949359287 | -5.601824964  | -3.192728822  |
| N390  | -6.079502700 | -0.445260600  | -2.160178152  |
| N391  | -8.353314229 | 0.645822489   | -0.942277184  |
| N392  | -7.852796299 | 0.351802777   | 1.807072137   |
| N393  | -5.689714132 | 2.084548800   | 2.275530082   |
| N394  | -3.121677650 | 2.676442549   | -1.101012607  |
| N395  | -2.466992114 | 0.659580812   | -0.721734110  |
| N396  | -6.322346292 | 4.729796971   | 2.858562762   |
| N397  | -9.777330318 | 7.722816590   | 1.583508071   |
| N398  | -9.672109558 | 9.508690742   | 2.896187394   |
| N399  | 9.477882016  | 2.661732993   | 2.423738834   |
| N400  | 6.291980162  | 7.201264414   | -0.277545890  |
| N401  | 4.227239631  | 8.467730041   | -2.860469684  |
| N402  | 1.560152911  | 7.842281066   | -3.341318767  |
| N403  | -3.173073746 | 6.401324748   | -4.457768963  |
| N404  | -3.357569929 | 8.254615768   | -5.876998728  |
| N405  | -4.453431930 | 8.236148036   | -3.838501262  |
| N406  | 0.652380264  | 6.332443994   | -1.063115957  |
| N407  | 0.974790522  | 8.230593838   | 0.976082309   |
| N408  | -0.367842260 | 10.613262752  | 0.649017686   |
| N409  | -1.886831895 | 10.313956420  | -3.035602393  |
| N410  | -2.752542917 | 11.619725840  | 1.702152828   |
| N411  | 4.098842799  | -4.744286760  | -10.246303752 |
| N412  | 2.462211261  | -2.574306874  | -7.870535306  |
| N413  | 1.430520619  | 0.223174831   | -7.322673779  |
| N414  | 3.496362496  | 2.240361960   | -7.356276553  |
| N415  | -1.724703870 | -2.987277646  | -10.059059687 |
| N416  | -3.291754869 | -1.178342039  | -8.474795720  |
| N417  | 8.129761781  | -7.039240791  | -5.988306480  |
| N418  | 4.254293218  | -5.691194007  | -4.367375799  |
| N419  | 3.680576497  | -6.644695125  | -6.269483386  |
| N420  | 9.226670294  | -7.459791439  | -3.058266531  |
| N421  | 0.120119513  | 2.228528301   | -0.052023178  |
| N422  | 2.638203499  | -0.443579139  | 1.460337651   |
| N423  | 0.968244466  | 1.722062424   | -0.604638901  |
| N424  | 1.958572841  | -1.297041250  | 1.238619805   |
| O425  | -6.559295229 | -5.141535252  | 1.618692908   |
| O426  | -7.244194471 | -2.802946637  | 4.486285212   |
| O427  | -5.256185221 | -5.178528832  | 6.673154007   |
| O428  | -2.466782457 | -3.942321462  | 4.969028798   |
| O429  | -3.055866296 | -0.471847204  | 5.333171132   |
| O430  | -3.285811792 | -0.951847033  | 8.955275348   |
| O431  | -0.523643867 | -3.935768071  | 9.687103841   |
| O432  | 2.192597779  | -3.752953033  | 6.149832654   |
| O433  | 1.896997827  | 0.226304729   | 6.641302185   |
| O434  | 0.872775486  | 1.882252627   | 9.684361509   |
| O435  | 1.559934462  | -0.238608749  | 12.459773875  |
| O436  | 7.056874300  | -10.330260268 | 2.070339891   |
| O437  | 8.008085945  | -7.669285412  | 5.764478839   |
| O438  | 11.597568317 | -4.549737387  | 4.558741195   |
| O439  | -5.615970490 | -0.844605996  | 0.051009621   |

|                          |                                   |               |              |              |
|--------------------------|-----------------------------------|---------------|--------------|--------------|
| O440                     | -3.691977018                      | -4.390345391  | -4.011654680 |              |
| O441                     | -7.135027192                      | 2.497736135   | -0.391552421 |              |
| O442                     | -6.339261797                      | 3.044551189   | -3.332735263 |              |
| O443                     | -9.786099446                      | 1.490148251   | 2.291602978  |              |
| O444                     | -5.663195182                      | 1.530116226   | 4.491569478  |              |
| O445                     | -4.258503025                      | 5.041030948   | 3.786061686  |              |
| O446                     | -6.582807192                      | 7.249888392   | 5.332302151  |              |
| O447                     | 10.761762553                      | -0.100356999  | 4.192098599  |              |
| O448                     | 3.551359977                       | 4.684262718   | 3.949776704  |              |
| O449                     | 3.607128616                       | 8.374150763   | -0.669849791 |              |
| O450                     | 0.994147486                       | 10.065124928  | -3.518931208 |              |
| O451                     | -1.412905256                      | 7.189773620   | -1.535188555 |              |
| O452                     | -0.697680623                      | 7.195322171   | 2.159965502  |              |
| O453                     | 2.422917905                       | 5.698766814   | 1.459189887  |              |
| O454                     | 0.856562243                       | 11.623042587  | 2.301596771  |              |
| O455                     | -2.508951576                      | 13.587025287  | 0.576450369  |              |
| O456                     | -3.268100064                      | 10.992120377  | -1.345282469 |              |
| O457                     | -4.950099493                      | 13.711903310  | 3.622199064  |              |
| O458                     | -5.508749534                      | 6.834666520   | -1.325862927 |              |
| O459                     | 1.755972601                       | -4.568614536  | -8.765328490 |              |
| O460                     | -0.276432007                      | -0.734504556  | -8.516999468 |              |
| O461                     | 2.107365342                       | 3.603059576   | -8.532193901 |              |
| O462                     | 5.875368402                       | 4.315976672   | -9.109630266 |              |
| O463                     | -5.007323197                      | -2.634533173  | -8.838028521 |              |
| O464                     | -1.460524243                      | -6.605772976  | -6.012816078 |              |
| O465                     | 0.460431943                       | -5.775425118  | -6.787550346 |              |
| O466                     | -3.996095510                      | 2.322620730   | -8.409755536 |              |
| O467                     | 9.938114722                       | -5.407131893  | -3.704957120 |              |
| O468                     | 12.657173608                      | -6.982679658  | -2.116220852 |              |
| O469                     | 0.288960062                       | -6.285443343  | -1.330991400 |              |
| O470                     | -0.258254441                      | -7.388103988  | 0.551397286  |              |
| O471                     | 5.130791982                       | -10.901885976 | -3.350702777 |              |
| O472                     | 2.869570410                       | -10.947445139 | -3.343021842 |              |
| O473                     | 5.078048233                       | -5.837586741  | -1.307324274 |              |
| O474                     | 5.016233481                       | -7.548078653  | 0.145885211  |              |
| O475                     | 2.603999264                       | -6.117775629  | -2.095282363 |              |
| O476                     | 8.949562586                       | -6.562425964  | 1.030044811  |              |
| O477                     | 6.972262779                       | -4.569761517  | 0.384267556  |              |
| O478                     | -4.378609879                      | 4.744753800   | -2.453670305 |              |
| O479                     | 7.709897384                       | -10.435540120 | -2.512174018 |              |
| O480                     | 7.508717229                       | -8.635439195  | -0.089704775 |              |
| S481                     | 3.572761615                       | 5.057574482   | -2.484918746 |              |
| S482                     | 2.066169851                       | 1.842257751   | -3.556125732 |              |
| S483                     | 2.090686095                       | -3.393983615  | -3.692967203 |              |
| S484                     | 3.909830603                       | 1.855219391   | -0.432860388 |              |
| S485                     | 0.591015352                       | -0.829106802  | -1.807451302 |              |
| S486                     | 4.067438019                       | -0.812757698  | -5.567011952 |              |
| S487                     | 3.374510284                       | -3.513143679  | -0.295284463 |              |
| S488                     | 5.610110379                       | 1.769065281   | -3.315198010 |              |
| S489                     | 5.720579017                       | -3.090061712  | -3.048150312 |              |
| S490                     | 6.413409653                       | -0.779413139  | -0.560934812 |              |
| end                      |                                   |               |              |              |
| transition state (S=3/2) | <b>bm52capexp347tg_1_53249.10</b> |               |              |              |
| Fe( 139) 2.318           | C1                                | -7.721612170  | -5.357528774 | 1.267310014  |
| Fe( 140) -0.328          | C2                                | -8.143776791  | -6.501647436 | 0.336778067  |
| Fe( 141) 2.595           | C3                                | -8.513860167  | -3.421330352 | 2.559347949  |
| Fe( 142) -2.214          | C4                                | -7.868652602  | -3.680697863 | 3.916300973  |
| Fe( 143) 2.184           | C5                                | -7.435804518  | -5.260737729 | 5.732036158  |
| Fe( 144) -1.858          | C6                                | -5.910978401  | -5.378881529 | 5.665935805  |
| Fe( 145) -0.101          | C7                                | -3.935406106  | -5.691247981 | 4.275886762  |
|                          | C8                                | -3.430509898  | -4.246574557 | 4.296123878  |
|                          | C9                                | -3.867251474  | -1.935395820 | 3.579414012  |
|                          | C10                               | -3.881934789  | -1.296582140 | 4.978059046  |
|                          | C11                               | -4.897487833  | -1.130485039 | 7.161674075  |
|                          | C12                               | -3.847680652  | -1.680522237 | 8.137733270  |
|                          | C13                               | -2.840662688  | -3.696284704 | 9.117662159  |
|                          | C14                               | -1.375358103  | -4.022097226 | 8.791080296  |
|                          | C15                               | 0.232176680   | -4.825838668 | 7.108936665  |
|                          | C16                               | 0.967487577   | -3.667196094 | 6.424002184  |
|                          | C17                               | 0.623186168   | -1.445274949 | 5.367362985  |
|                          | C18                               | 0.760057649   | -0.230040454 | 6.299783914  |
|                          | C19                               | -0.259789394  | -1.241348589 | 4.117031540  |
|                          | C20                               | -0.032097030  | 0.114249054  | 3.420534406  |
|                          | C21                               | -0.078445511  | -2.417550315 | 3.150654129  |
|                          | C22                               | -0.351717429  | 1.530174025  | 7.597391383  |
|                          | C23                               | 0.023577950   | 1.212045583  | 9.057416163  |
|                          | C24                               | -1.677492529  | 2.317337850  | 7.468120311  |
|                          | C25                               | -1.736784137  | 3.484076473  | 8.459605129  |
|                          | C26                               | -1.861086659  | 2.826996316  | 6.031850730  |
|                          | C27                               | -0.395963445  | -0.087353290 | 11.064691618 |

|      |               |               |              |
|------|---------------|---------------|--------------|
| C28  | 1.070686894   | -0.348556568  | 11.343994132 |
| C29  | 5.896933236   | -11.584190282 | 3.760922184  |
| C30  | 6.515431059   | -10.311645008 | 3.196085262  |
| C31  | 6.779837863   | -7.883670941  | 3.678088404  |
| C32  | 7.999064028   | -7.485769446  | 4.529938699  |
| C33  | 5.595001336   | -6.935807706  | 3.918258438  |
| C34  | 5.925343902   | -5.493819231  | 3.550722877  |
| C35  | 4.685235442   | -4.606709721  | 3.511639487  |
| C36  | 4.907266252   | -2.107271520  | 3.551207749  |
| C37  | 10.265479095  | -6.558264204  | 4.487224367  |
| C38  | 10.502178956  | -5.065125947  | 4.475024518  |
| C39  | -5.314906902  | -2.671359069  | -1.555552625 |
| C40  | -5.685669005  | -1.240977756  | -1.117338113 |
| C41  | -3.778704394  | -2.819131377  | -1.504746915 |
| C42  | -3.243033974  | -4.261100867  | -1.620956205 |
| C43  | -2.978321813  | -4.748544243  | -3.046068153 |
| C44  | -6.186878865  | 0.997613911   | -2.021979407 |
| C45  | -7.279639458  | 1.449825169   | -1.043165962 |
| C46  | -6.367287690  | 1.604239949   | -3.419181967 |
| C47  | -9.433571657  | 0.920514435   | 0.000258916  |
| C48  | -9.037200870  | 0.944941032   | 1.479797222  |
| C49  | -7.328641647  | 0.441772875   | 3.163162968  |
| C50  | -6.155191389  | 1.400327992   | 3.372217152  |
| C51  | -4.603206516  | 3.041048612   | 2.435063578  |
| C52  | -5.047211813  | 4.347330797   | 3.134152835  |
| C53  | -4.025464207  | 3.477962156   | 1.080408407  |
| C54  | -3.407054077  | 2.416473780   | 0.234108434  |
| C55  | -2.987677312  | 1.131917103   | 0.470077371  |
| C56  | -2.553961206  | 1.601082547   | -1.665314914 |
| C57  | -6.847785337  | 6.028765214   | 3.232950693  |
| C58  | -6.759701911  | 6.184481386   | 4.749944001  |
| C59  | -8.318733265  | 6.083739964   | 2.759248211  |
| C60  | -8.945414657  | 7.443079255   | 2.650331731  |
| C61  | -8.869160231  | 8.546793093   | 3.477536167  |
| C62  | -10.205220442 | 8.961327444   | 1.758878199  |
| C63  | 9.239262761   | 1.622978043   | 3.446448339  |
| C64  | 10.259520619  | 0.511884685   | 3.276144875  |
| C65  | 7.842522210   | 0.982124250   | 3.262086840  |
| C66  | 6.709183012   | 1.958956737   | 3.473335381  |
| C67  | 6.140575019   | 2.161076973   | 4.743484231  |
| C68  | 6.187327909   | 2.696175947   | 2.394972048  |
| C69  | 5.087517309   | 3.063941093   | 4.934827043  |
| C70  | 5.152098157   | 3.614063849   | 2.572854758  |
| C71  | 4.595683795   | 3.789918954   | 3.842319585  |
| C72  | 5.378032217   | 6.872830267   | -1.382869730 |
| C73  | 4.319300720   | 7.967891178   | -1.595631100 |
| C74  | 4.711007177   | 5.532013208   | -1.082404533 |
| C75  | 3.308366112   | 9.545211711   | -3.206036941 |
| C76  | 1.833578493   | 9.167242853   | -3.365700598 |
| C77  | 0.210884270   | 7.275300149   | -3.323832009 |
| C78  | -0.256899309  | 6.928161178   | -1.886629287 |
| C79  | 0.243165355   | 6.027572241   | -4.236575790 |
| C80  | -1.009629174  | 5.149380419   | -4.344760798 |
| C81  | -2.152816741  | 5.683819942   | -5.224448654 |
| C82  | -3.672663897  | 7.605768178   | -4.740563793 |
| C83  | 0.262810629   | 5.987135553   | 0.312414194  |
| C84  | 0.111199815   | 7.211289537   | 1.227924167  |
| C85  | 1.254936546   | 5.017582473   | 0.986837788  |
| C86  | 1.203524524   | 9.274605961   | 1.963076359  |
| C87  | 0.559061749   | 10.617667744  | 1.653104027  |
| C88  | -0.858240713  | 11.880686768  | 0.123480901  |
| C89  | -2.131197227  | 12.433028872  | 0.809499680  |
| C90  | -1.025342599  | 11.883493940  | -1.398857810 |
| C91  | -2.164762670  | 11.003251161  | -1.896313877 |
| C92  | -4.075806821  | 11.948797747  | 2.221379969  |
| C93  | -3.983271787  | 13.047865183  | 3.271132674  |
| C94  | -4.729838803  | 10.677947753  | 2.833630703  |
| C95  | -4.973300419  | 9.604615034   | 1.796569801  |
| C96  | -6.160639433  | 9.594397020   | 1.048261851  |
| C97  | -4.004547182  | 8.628286452   | 1.511518975  |
| C98  | -6.368085170  | 8.657758190   | 0.033720314  |
| C99  | -4.181982512  | 7.699963387   | 0.481079435  |
| C100 | -5.364094010  | 7.731900059   | -0.252953439 |
| C101 | 4.086649253   | -3.977198268  | -9.000441316 |
| C102 | 2.660018473   | -3.727464826  | -8.546034094 |
| C103 | 1.207630691   | -2.196830753  | -7.232201734 |
| C104 | 0.710077293   | -0.837555545  | -7.738887961 |
| C105 | 1.127315252   | 1.583475669   | -7.694504426 |
| C106 | 2.295026358   | 2.546218855   | -7.901745690 |
| C107 | 4.574734992   | 3.235672877   | -7.403747486 |

|       |              |               |              |
|-------|--------------|---------------|--------------|
| C108  | 5.187833135  | 3.372923467   | -8.783175824 |
| C109  | -2.760252716 | -3.490721513  | -9.141112633 |
| C110  | -3.788738448 | -2.404252455  | -8.802927158 |
| C111  | -2.272497879 | -4.174796577  | -7.844451804 |
| C112  | -1.536159250 | -5.492104073  | -8.149433900 |
| C113  | -0.853396388 | -6.017519219  | -6.907124412 |
| C114  | -4.192953995 | -0.085371402  | -8.145168074 |
| C115  | -3.717971212 | 1.199619588   | -8.793667032 |
| C116  | -4.570223874 | 0.044956528   | -6.648671046 |
| C117  | -3.333481328 | 0.055575628   | -5.796905749 |
| C118  | -2.607174019 | 1.242667208   | -5.600491406 |
| C119  | -2.794455572 | -1.157313396  | -5.337389272 |
| C120  | -1.325393110 | 1.195529599   | -5.043213453 |
| C121  | -1.514368322 | -1.203165578  | -4.779877750 |
| C122  | -0.762583068 | -0.029062322  | -4.673362248 |
| C123  | 7.905687946  | -6.222464411  | -4.757906317 |
| C124  | 9.092298251  | -6.317565341  | -3.786669746 |
| C125  | 6.595931090  | -6.597020037  | -4.050430956 |
| C126  | 5.336546289  | -6.362638635  | -4.819979941 |
| C127  | 4.961346692  | -6.933389146  | -6.019223717 |
| C128  | 3.248095193  | -5.810792088  | -5.180791126 |
| C129  | 10.304354170 | -7.555263597  | -2.093563513 |
| C130  | 11.653280329 | -7.314518686  | -2.735141790 |
| C131  | 0.594659000  | -6.948347625  | -0.182294639 |
| C132  | 2.085351398  | -6.986259286  | 0.132767942  |
| C133  | 3.001935271  | -7.102037613  | -1.121549057 |
| C134  | 2.902880610  | -8.533300202  | -1.712910285 |
| C135  | 3.941578217  | -8.872690421  | -2.785305652 |
| C136  | 3.966799090  | -10.364427325 | -3.184134561 |
| C137  | 4.461627227  | -6.856419353  | -0.707673575 |
| C138  | 3.601179277  | -0.684492102  | -2.234792422 |
| Fe139 | 3.805947144  | -2.004996879  | -3.658444236 |
| Fe140 | 2.243726382  | 0.704796701   | -1.454220245 |
| Fe141 | 5.051385138  | 0.444428912   | -1.508891004 |
| Fe142 | 3.823936863  | 0.494216450   | -3.767451281 |
| Fe143 | 3.858349302  | 2.750666188   | -2.519406647 |
| Fe144 | 4.751685172  | -2.057362378  | -1.238076289 |
| Fe145 | 2.183460948  | -2.374571584  | -1.457612418 |
| H146  | -6.388658970 | -7.540764084  | 0.316353592  |
| H147  | -6.575214575 | -6.555310045  | -0.971916379 |
| H148  | -9.689349559 | -4.766845639  | 1.395125192  |
| H149  | -8.864433638 | -6.106699245  | -0.397482146 |
| H150  | -8.705999498 | -7.222996052  | 0.954611031  |
| H151  | -7.856177844 | -2.715789312  | 2.030740654  |
| H152  | -8.626786387 | -5.582242899  | 3.968141412  |
| H153  | -9.475915278 | -2.919523685  | 2.728122331  |
| H154  | -7.852648441 | -6.219403398  | 6.066591473  |
| H155  | -5.976455924 | -5.838584501  | 3.657096721  |
| H156  | -7.656914503 | -4.504776751  | 6.496713456  |
| H157  | -2.874007467 | -1.741338737  | 3.153264628  |
| H158  | -4.945494430 | -3.697805687  | 3.016812675  |
| H159  | -3.688865522 | -6.161725140  | 3.314840746  |
| H160  | -4.740815974 | -0.045603215  | 7.103495636  |
| H161  | -5.623470972 | -2.278354673  | 5.484450164  |
| H162  | -3.412298186 | -6.232086946  | 5.072935539  |
| H163  | -4.612400168 | -1.440062851  | 2.940843164  |
| H164  | -4.179766545 | -3.592793900  | 7.451464051  |
| H165  | -5.893198014 | -1.319631304  | 7.587017553  |
| H166  | -0.365783672 | -3.371945476  | 3.613083550  |
| H167  | -0.698997590 | -2.278168307  | 2.251440080  |
| H168  | 0.961413571  | -2.483835868  | 2.803444890  |
| H169  | -1.295436221 | -1.245753566  | 4.477396205  |
| H170  | -3.346111298 | -4.640061642  | 9.371694047  |
| H171  | -1.867099771 | 2.009182696   | 5.299431021  |
| H172  | -1.446035718 | -0.254266946  | 9.211777961  |
| H173  | -1.679312607 | 3.148937676   | 9.504981080  |
| H174  | 0.652796203  | 0.024519741   | 2.565638322  |
| H175  | 0.371278150  | 0.882250580   | 4.095676836  |
| H176  | 9.313394728  | 1.980369680   | 4.491274131  |
| H177  | -2.816767812 | 3.362227470   | 5.935947553  |
| H178  | -2.681803771 | 4.031266424   | 8.328819139  |
| H179  | -1.050933352 | 3.526922472   | 5.768061785  |
| H180  | -0.907967380 | 4.188101309   | 8.283214156  |
| H181  | -2.502452565 | 1.620031931   | 7.702280390  |
| H182  | 0.476804524  | 2.159671976   | 7.238190546  |
| H183  | -1.290889826 | 0.021480284   | 6.387970300  |
| H184  | -0.991145640 | 0.505635646   | 3.045533349  |
| H185  | 1.546875289  | 4.244188538   | 0.261480252  |
| H186  | 0.715812874  | 4.532045549   | 1.813700785  |
| H187  | 2.664064185  | 5.318031275   | 2.331733868  |

|      |               |              |               |
|------|---------------|--------------|---------------|
| H188 | 3.209729332   | 4.680913604  | 4.870348207   |
| H189 | 4.749398537   | 4.166414459  | 1.723991759   |
| H190 | 6.580697812   | 2.530416160  | 1.389400736   |
| H191 | 6.515900405   | 1.596111992  | 5.601367843   |
| H192 | -0.822330255  | -2.733388919 | 6.235751025   |
| H193 | 0.205278403   | -5.666267923 | 6.400478428   |
| H194 | 0.832649407   | -5.134179849 | 7.974146992   |
| H195 | -1.866370334  | -4.571687654 | 6.846500843   |
| H196 | -2.819999624  | -3.062213595 | 10.011877194  |
| H197 | 4.644081540   | 3.194383593  | 5.925993950   |
| H198 | 1.652251881   | -1.653525406 | 5.049359018   |
| H199 | -0.746138147  | 0.717451193  | 11.730991017  |
| H200 | -0.942124843  | -1.007799104 | 11.322911349  |
| H201 | 1.657531123   | -0.734659855 | 10.478474718  |
| H202 | 11.136642046  | -7.065805382 | 4.046008818   |
| H203 | -1.760446367  | -5.993840668 | -4.122779083  |
| H204 | 1.211711980   | -6.061331850 | -1.776760850  |
| H205 | -2.264437149  | -6.245533383 | -8.483132529  |
| H206 | -0.802894987  | -5.340405084 | -8.954639755  |
| H207 | -3.125872436  | -4.386404605 | -7.181603077  |
| H208 | -3.121055470  | 1.048218693  | -9.724073060  |
| H209 | -3.347684298  | -4.232076168 | -9.705006678  |
| H210 | -3.340113366  | -2.196072185 | -2.302442483  |
| H211 | -3.958671883  | -4.966701475 | -1.164961122  |
| H212 | -2.282179937  | -1.024953584 | -8.423584852  |
| H213 | -5.132899116  | -0.319519964 | -8.688001493  |
| H214 | -1.036782386  | -2.404412729 | -9.549307015  |
| H215 | -1.333071657  | -5.867022381 | -2.419823363  |
| H216 | -1.618726827  | -3.476012795 | -7.299574722  |
| H217 | -1.215092570  | -3.761760188 | -10.466041582 |
| H218 | -6.732200902  | -3.453190454 | -2.840913015  |
| H219 | -3.445828944  | -2.411681795 | -0.538442055  |
| H220 | 0.832250497   | -5.282522604 | -7.594932004  |
| H221 | -2.318731375  | -4.351522718 | -1.032655483  |
| H222 | -3.826102411  | 2.602879683  | 3.077155329   |
| H223 | -3.028805743  | 0.520848372  | 1.362381501   |
| H224 | -8.142411587  | 0.786641590  | 3.815818640   |
| H225 | -7.266572979  | -0.071683152 | 1.091241766   |
| H226 | -6.923813085  | 4.080087424  | 2.349012231   |
| H227 | -8.317146434  | 8.737425069  | 4.390332066   |
| H228 | -6.906979793  | 5.228439422  | 5.309201109   |
| H229 | -8.927123832  | 5.419890279  | 3.399268005   |
| H230 | -6.262389430  | 6.832648789  | 2.759462365   |
| H231 | -10.885282671 | 9.508632652  | 1.111829438   |
| H232 | -3.267628819  | 4.250532751  | 1.287052377   |
| H233 | -4.823650924  | 3.963888748  | 0.496389627   |
| H234 | -9.834399858  | 10.440938108 | 3.245410424   |
| H235 | -8.350580423  | 5.648349999  | 1.747858044   |
| H236 | -6.173109128  | 2.010693082  | 1.380275651   |
| H237 | -7.024103422  | -0.548781519 | 3.532948461   |
| H238 | -9.881743174  | 1.901536666  | -0.211132924  |
| H239 | -2.213560973  | 1.500466561  | -2.693468915  |
| H240 | -10.213928295 | 0.160830705  | -0.136686092  |
| H241 | 10.301061670  | 3.205435391  | 2.696639002   |
| H242 | 8.693310278   | 3.308761193  | 2.423670832   |
| H243 | 1.547837246   | 5.982701051  | -1.423029656  |
| H244 | -0.723668432  | 5.502107593  | 0.284913276   |
| H245 | 1.736774236   | 8.067876432  | 0.312486640   |
| H246 | -3.437249190  | 3.541856768  | -1.608713833  |
| H247 | -5.107101748  | 4.157248546  | -2.783126714  |
| H248 | -6.717085140  | 3.390777133  | -4.151130332  |
| H249 | -4.794359902  | 5.408785633  | -1.850112674  |
| H250 | -5.547789084  | 1.240017671  | -4.060404234  |
| H251 | -7.326960687  | 1.278813686  | -3.849059446  |
| H252 | -0.071487772  | 11.619928726 | -1.876607976  |
| H253 | -1.270342841  | 12.916264522 | -1.691982377  |
| H254 | -0.910115242  | 10.155940857 | -3.310127996  |
| H255 | -2.579868870  | 9.588922947  | -3.269898500  |
| H256 | -3.659024196  | 9.219666008  | -6.009462507  |
| H257 | -2.645434696  | 4.850164685  | -5.747590441  |
| H258 | -7.305179751  | 8.652919524  | -0.529355287  |
| H259 | -3.085368158  | 8.568952645  | 2.099763315   |
| H260 | -4.709208182  | 7.761084202  | -2.965168358  |
| H261 | 1.063892117   | 5.384429560  | -3.879547894  |
| H262 | 2.340384493   | 7.199064054  | -3.224842831  |
| H263 | -1.396916543  | 4.887130652  | -3.347779753  |
| H264 | -8.364733896  | -0.227772530 | -1.466965647  |
| H265 | 3.641732894   | 10.003074457 | -4.146932994  |
| H266 | -6.087300092  | -0.954263662 | -3.048177668  |
| H267 | 0.537586023   | 6.363737378  | -5.244273741  |

|      |              |               |               |
|------|--------------|---------------|---------------|
| H268 | -3.387314688 | 6.994439521   | 0.234727424   |
| H269 | 3.341993357  | 10.318210341  | -2.424617716  |
| H270 | -2.909174345 | 7.792944425   | -6.649559489  |
| H271 | -5.099637312 | 8.952916142   | -4.160322273  |
| H272 | -5.168258158 | -3.513844356  | -3.430419228  |
| H273 | -5.740223248 | -3.335115847  | -0.779684016  |
| H274 | -6.945536455 | 10.323196464  | 1.263622436   |
| H275 | -5.260749073 | 1.397038906   | -1.584767341  |
| H276 | -0.488506025 | 8.028736509   | -3.697727257  |
| H277 | -1.737251439 | 6.343156588   | -5.996642416  |
| H278 | -0.676808731 | 4.206309864   | -4.800525783  |
| H279 | -3.606773035 | 5.869503880   | -3.680279001  |
| H280 | 0.819424224  | 8.939347066   | 2.938136762   |
| H281 | -0.457790291 | 9.763603783   | 0.097892755   |
| H282 | -0.091035996 | 12.631964082  | 0.365761081   |
| H283 | 2.282563288  | 9.452550318   | 2.063110632   |
| H284 | -2.447357193 | 10.650414303  | 1.723165193   |
| H285 | 4.606477792  | -3.019470334  | -9.148488381  |
| H286 | 4.586547338  | -4.487107260  | -8.150110226  |
| H287 | 7.865250570  | -5.164290476  | -5.056032526  |
| H288 | 5.046799176  | -5.075970937  | -10.424817140 |
| H289 | 3.512203478  | -5.569085169  | -10.135346626 |
| H290 | 5.497766077  | 4.782211951   | -0.938055939  |
| H291 | 5.714301839  | 7.435690085   | 0.549582051   |
| H292 | 4.831434216  | 8.096350380   | -3.584617995  |
| H293 | 4.111102666  | 5.611415408   | -0.165341535  |
| H294 | 6.817655469  | 8.042238924   | -0.496727509  |
| H295 | 5.369632278  | 2.906701929   | -6.716572983  |
| H296 | 5.986068920  | 6.771986868   | -2.295329280  |
| H297 | 5.284843925  | -7.008794593  | 4.973871065   |
| H298 | 7.046182220  | -7.867921742  | 2.613321229   |
| H299 | 3.643969534  | 1.419563662   | -6.776443588  |
| H300 | 5.182921791  | -0.093039157  | 3.293470034   |
| H301 | 0.558324048  | 1.550981085   | -8.631187699  |
| H302 | -1.095157447 | -2.154836694  | -4.445120458  |
| H303 | 0.473664105  | 2.058092650   | -6.942084837  |
| H304 | 4.251856240  | -4.491481690  | 4.512293216   |
| H305 | 2.139745892  | 0.025878828   | -6.575404713  |
| H306 | 3.909865529  | -5.056666248  | 2.870655622   |
| H307 | 4.759151067  | -7.298173235  | 3.298374369   |
| H308 | 6.393025509  | -5.470088411  | 2.555063818   |
| H309 | 6.650653664  | -5.062589469  | 4.258348627   |
| H310 | -5.218292775 | -0.804933461  | -6.390344047  |
| H311 | 5.923320320  | -9.441802075  | 4.895873862   |
| H312 | 4.981480044  | -11.764009746 | 3.177248386   |
| H313 | 0.253964257  | -0.049134433  | -4.289163059  |
| H314 | 6.342349076  | -11.751065242 | 5.764861992   |
| H315 | 4.788101996  | -12.123335455 | 5.410093390   |
| H316 | 5.525427176  | -3.322319350  | 2.063288713   |
| H317 | -0.742331346 | 2.108086536   | -4.907969610  |
| H318 | -3.368678523 | -2.080558365  | -5.440039817  |
| H319 | 7.615517190  | -9.938186853  | -1.665435647  |
| H320 | 6.624736907  | -7.668236942  | -3.785088668  |
| H321 | 6.615682717  | -8.183748412  | -0.101307128  |
| H322 | 6.750404179  | -10.542645290 | -2.809447296  |
| H323 | 4.957838118  | 2.540067080   | -9.490411788  |
| H324 | 6.364580545  | -5.072432446  | -0.236836271  |
| H325 | 2.283557718  | -7.802342643  | 0.838099643   |
| H326 | 3.282164609  | -2.024168938  | -7.604660116  |
| H327 | 3.018004502  | -9.233544789  | -0.870564044  |
| H328 | 3.050858744  | -6.878312469  | -6.986871650  |
| H329 | 2.240308292  | -5.429283939  | -5.078107716  |
| H330 | 6.591847130  | -12.408542152 | 3.525360921   |
| H331 | 5.783976273  | -1.067148608  | 1.985226971   |
| H332 | 8.365879766  | -5.801451314  | 0.786331917   |
| H333 | 7.229277906  | -3.787268026  | -0.167483537  |
| H334 | 8.970721968  | -6.848618709  | 2.795808370   |
| H335 | 3.700930043  | -2.701195033  | 5.152892176   |
| H336 | 3.733730200  | -8.288983493  | -3.695081435  |
| H337 | 4.949154224  | -8.592893338  | -2.449419150  |
| H338 | 1.887581273  | -8.674730668  | -2.113747467  |
| H339 | 1.346128472  | -2.171258062  | -6.139372447  |
| H340 | -3.031444679 | 2.191928026   | -5.935959676  |
| H341 | -5.152121370 | 0.972601345   | -6.541528797  |
| H342 | 2.304794711  | -6.036762778  | 0.649773711   |
| H343 | 8.503913260  | -7.337845172  | 0.581439844   |
| H344 | 7.409167820  | -9.253808870  | 0.675110352   |
| H345 | 4.154095329  | -1.040527861  | 5.127783575   |
| H346 | 5.508249713  | -7.569466406  | -6.704148050  |
| H347 | 6.535266529  | -6.055292611  | -3.099427517  |

|       |              |               |               |
|-------|--------------|---------------|---------------|
| H348  | 0.457295802  | -2.948840617  | -7.482729115  |
| H349  | 4.231857254  | 4.225746672   | -7.066453265  |
| H350  | 7.759365174  | 0.148270427   | 3.974400036   |
| H351  | 7.787653385  | 0.560998698   | 2.245454283   |
| H352  | 8.977096330  | -6.708262305  | -6.438054845  |
| H353  | 8.259993933  | -8.002231598  | -5.737038421  |
| H354  | 10.308994509 | -8.583474576  | -1.698976503  |
| H355  | 8.543464052  | -8.223003271  | -3.094359659  |
| H356  | 11.697169596 | -7.545197498  | -3.826947644  |
| H357  | 10.169943469 | -6.873235341  | -1.239044349  |
| H358  | 10.540771153 | 0.305343165   | 2.214819714   |
| H359  | -2.973247513 | 13.185460654  | 3.724415628   |
| H360  | 10.192764165 | -6.865073445  | 5.545558860   |
| H361  | 9.582527770  | -4.436804028  | 4.384852522   |
| H362  | -4.715033184 | 12.321283152  | 1.403805161   |
| H363  | -4.084785944 | 10.296916986  | 3.640968788   |
| H364  | -5.678767214 | 10.990348386  | 3.292893127   |
| H365  | 1.103722661  | -3.291975183  | -0.966201730  |
| H366  | 3.860194583  | -1.221022607  | 0.048111199   |
| H367  | -6.460339461 | 6.800524977   | -1.568282591  |
| H368  | 0.146770338  | -0.930298687  | -0.538772616  |
| H369  | -2.026658678 | -0.250212272  | -0.869050864  |
| Mo370 | 3.839073950  | -4.406058612  | -2.347461153  |
| N371  | -7.078254641 | -7.199977697  | -0.357862300  |
| N372  | -8.752791414 | -4.610792255  | 1.760105597   |
| N373  | -8.058757091 | -4.902276403  | 4.467687098   |
| N374  | -5.376242110 | -5.762275364  | 4.479425604   |
| N375  | -4.159006919 | -3.360933090  | 3.568952633   |
| N376  | -4.844210982 | -1.713565036  | 5.832738864   |
| N377  | -3.620049969 | -3.019403849  | 8.088450628   |
| N378  | -1.121798740 | -4.523482167  | 7.547058645   |
| N379  | 0.180712173  | -2.614806639  | 6.107271205   |
| N380  | -0.390057413 | 0.326571040   | 6.765013324   |
| N381  | -0.647380996 | 0.199482801   | 9.663193397   |
| N382  | 5.545944506  | -11.477144131 | 5.184503456   |
| N383  | 6.381675972  | -9.241099201  | 4.000628112   |
| N384  | 5.035477612  | -3.297713646  | 2.960439693   |
| N385  | 4.298005489  | -1.973017746  | 4.749011286   |
| N386  | 5.414553609  | -1.019385306  | 2.946314539   |
| N387  | 9.034185633  | -6.954551699  | 3.832640547   |
| N388  | -5.848695711 | -2.942543974  | -2.896031710  |
| N389  | -1.958514568 | -5.613336773  | -3.191253322  |
| N390  | -6.075613336 | -0.444813703  | -2.148098274  |
| N391  | -8.356537145 | 0.639082815   | -0.933750482  |
| N392  | -7.856315265 | 0.352634701   | 1.814609874   |
| N393  | -5.686439144 | 2.078012044   | 2.278632416   |
| N394  | -3.125502597 | 2.673719204   | -1.101596167  |
| N395  | -2.474036254 | 0.655684091   | -0.720963943  |
| N396  | -6.320174384 | 4.725062221   | 2.852949549   |
| N397  | -9.783466744 | 7.714835109   | 1.580666806   |
| N398  | -9.673479104 | 9.501377932   | 2.891985620   |
| N399  | 9.480213433  | 2.654096246   | 2.434977042   |
| N400  | 6.282354062  | 7.199752740   | -0.270417015  |
| N401  | 4.212541014  | 8.461025989   | -2.865250821  |
| N402  | 1.553582622  | 7.847831627   | -3.335799298  |
| N403  | -3.176443043 | 6.401335248   | -4.458235833  |
| N404  | -3.350845123 | 8.263114233   | -5.868230290  |
| N405  | -4.457449691 | 8.234817370   | -3.836274090  |
| N406  | 0.649234828  | 6.334601501   | -1.057597029  |
| N407  | 0.975419115  | 8.235006430   | 0.976688264   |
| N408  | -0.365505114 | 10.618919500  | 0.645262508   |
| N409  | -1.888270855 | 10.295172406  | -3.025801070  |
| N410  | -2.754833170 | 11.619448077  | 1.697799292   |
| N411  | 4.097464667  | -4.737043298  | -10.253304142 |
| N412  | 2.463414039  | -2.580189117  | -7.864383264  |
| N413  | 1.437471611  | 0.218293376   | -7.309602419  |
| N414  | 3.499648083  | 2.256669324   | -7.346639993  |
| N415  | -1.724678661 | -2.980964532  | -10.047899748 |
| N416  | -3.294305200 | -1.177698604  | -8.467410341  |
| N417  | 8.114141908  | -7.017736544  | -5.981708582  |
| N418  | 4.250169980  | -5.648567124  | -4.315810230  |
| N419  | 3.648920611  | -6.571083577  | -6.224410443  |
| N420  | 9.220737226  | -7.457042500  | -3.055200833  |
| N421  | 0.118280758  | 2.277788331   | -0.151905503  |
| N422  | 2.630243160  | -0.814927226  | 0.356862407   |
| N423  | 0.962600905  | 1.709872650   | -0.642074309  |
| N424  | 1.882214887  | -1.586228887  | 0.836415488   |
| O425  | -6.542814861 | -5.142220249  | 1.598452066   |
| O426  | -7.203342397 | -2.788502866  | 4.470635113   |
| O427  | -5.220546305 | -5.142147647  | 6.670874678   |



|                                                                 |      |              |                              |              |
|-----------------------------------------------------------------|------|--------------|------------------------------|--------------|
|                                                                 | O428 | -2.437027241 | -3.910472593                 | 4.957382907  |
|                                                                 | O429 | -3.040438021 | -0.441105389                 | 5.292253272  |
|                                                                 | O430 | -3.292776277 | -0.922046824                 | 8.952098883  |
|                                                                 | O431 | -0.499292371 | -3.878137374                 | 9.652682200  |
|                                                                 | O432 | 2.186833269  | -3.744324165                 | 6.182687317  |
|                                                                 | O433 | 1.886285828  | 0.193391886                  | 6.608110500  |
|                                                                 | O434 | 0.896430431  | 1.865077667                  | 9.654043749  |
|                                                                 | O435 | 1.574030265  | -0.213345098                 | 12.448672106 |
|                                                                 | O436 | 7.058010812  | -10.324238299                | 2.072400030  |
|                                                                 | O437 | 7.995434501  | -7.647734521                 | 5.763364803  |
|                                                                 | O438 | 11.608915034 | -4.559147528                 | 4.573250677  |
|                                                                 | O439 | -5.615588314 | -0.847361907                 | 0.063481645  |
|                                                                 | O440 | -3.687058108 | -4.383479587                 | -4.012618126 |
|                                                                 | O441 | -7.145537000 | 2.496381630                  | -0.383958437 |
|                                                                 | O442 | -6.335848412 | 3.041951160                  | -3.325718970 |
|                                                                 | O443 | -9.795673240 | 1.481742926                  | 2.297633070  |
|                                                                 | O444 | -5.663731819 | 1.531755926                  | 4.496578571  |
|                                                                 | O445 | -4.263509474 | 5.031682672                  | 3.797203711  |
|                                                                 | O446 | -6.595632689 | 7.246113259                  | 5.326076106  |
|                                                                 | O447 | 10.731164781 | -0.133775854                 | 4.201061049  |
|                                                                 | O448 | 3.547598151  | 4.683563897                  | 3.955872133  |
|                                                                 | O449 | 3.604436438  | 8.389872310                  | -0.669796704 |
|                                                                 | O450 | 0.987939561  | 10.069496891                 | -3.520351278 |
|                                                                 | O451 | -1.417429661 | 7.186920712                  | -1.532171335 |
|                                                                 | O452 | -0.704472060 | 7.210341106                  | 2.159303645  |
|                                                                 | O453 | 2.413041158  | 5.703899894                  | 1.467698830  |
|                                                                 | O454 | 0.860454965  | 11.630980295                 | 2.295035432  |
|                                                                 | O455 | -2.509273424 | 13.590284263                 | 0.578500286  |
|                                                                 | O456 | -3.273737180 | 10.983697457                 | -1.343407196 |
|                                                                 | O457 | -4.942840501 | 13.714559721                 | 3.622555762  |
|                                                                 | O458 | -5.513851408 | 6.831370813                  | -1.328301182 |
|                                                                 | O459 | 1.756240854  | -4.568411207                 | -8.772741747 |
|                                                                 | O460 | -0.275504729 | -0.736409379                 | -8.497804735 |
|                                                                 | O461 | 2.097240138  | 3.602549612                  | -8.524585072 |
|                                                                 | O462 | 5.911840465  | 4.302171154                  | -9.100997222 |
|                                                                 | O463 | -5.008295156 | -2.639784462                 | -8.815736351 |
|                                                                 | O464 | -1.448414364 | -6.607371525                 | -6.011916011 |
|                                                                 | O465 | 0.466406745  | -5.765025444                 | -6.789755860 |
|                                                                 | O466 | -3.995308136 | 2.322393186                  | -8.394887517 |
|                                                                 | O467 | 9.938116049  | -5.406010590                 | -3.699854706 |
|                                                                 | O468 | 12.648232150 | -6.966757352                 | -2.115654441 |
|                                                                 | O469 | 0.274313885  | -6.298307206                 | -1.310736010 |
|                                                                 | O470 | -0.262785711 | -7.420685602                 | 0.560607738  |
|                                                                 | O471 | 5.118791986  | -10.903636149                | -3.344829798 |
|                                                                 | O472 | 2.857115378  | -10.944649274                | -3.351072902 |
|                                                                 | O473 | 5.089819423  | -5.890685644                 | -1.330348817 |
|                                                                 | O474 | 5.001770847  | -7.573731330                 | 0.154015748  |
|                                                                 | O475 | 2.598236534  | -6.106452309                 | -2.062502210 |
|                                                                 | O476 | 8.947967421  | -6.563271118                 | 1.027095725  |
|                                                                 | O477 | 6.985023699  | -4.575186960                 | 0.354607211  |
|                                                                 | O478 | -4.374566306 | 4.743523938                  | -2.450720375 |
|                                                                 | O479 | 7.701806536  | -10.433619585                | -2.510056051 |
|                                                                 | O480 | 7.503065329  | -8.632630685                 | -0.091318901 |
|                                                                 | S481 | 3.590891810  | 4.967593669                  | -2.440282977 |
|                                                                 | S482 | 2.092967845  | 1.856262860                  | -3.478295715 |
|                                                                 | S483 | 2.017473812  | -3.364916884                 | -3.447070375 |
|                                                                 | S484 | 3.839382163  | 2.014716913                  | -0.425159243 |
|                                                                 | S485 | 0.540773344  | -0.874014624                 | -1.842964160 |
|                                                                 | S486 | 3.993957626  | -0.813354200                 | -5.518672734 |
|                                                                 | S487 | 3.530728484  | -3.629756307                 | -0.182417230 |
|                                                                 | S488 | 5.652384041  | 1.684026968                  | -3.293870947 |
|                                                                 | S489 | 5.673676060  | -3.065962293                 | -3.046884809 |
|                                                                 | S490 | 6.380703249  | -0.865037346                 | -0.335834794 |
|                                                                 | end  |              |                              |              |
| <b>product Fe<sub>2</sub>-brNH-NH-Fe<sub>6</sub></b><br>(S=3/2) |      |              | <b>bm52capexp347tg_car_6</b> |              |
| Fe( 139) 2.416                                                  | C1   | -7.718196511 | -5.352898645                 | 1.290072937  |
| Fe( 140) 0.020                                                  | C2   | -8.055309545 | -6.509440248                 | 0.341622422  |
| Fe( 141) 2.627                                                  | C3   | -8.618108083 | -3.462385737                 | 2.576097494  |
| Fe( 142) -2.342                                                 | C4   | -7.988527564 | -3.730318018                 | 3.941305396  |
| Fe( 143) 2.373                                                  | C5   | -7.584772214 | -5.336284121                 | 5.743091369  |
| Fe( 144) -2.287                                                 | C6   | -6.058787113 | -5.454981761                 | 5.688530758  |
| Fe( 145) -0.161                                                 | C7   | -4.076041724 | -5.775869210                 | 4.303546090  |
|                                                                 | C8   | -3.525144431 | -4.348686083                 | 4.347349185  |
|                                                                 | C9   | -3.889564906 | -2.009653104                 | 3.704947089  |
|                                                                 | C10  | -3.892450980 | -1.407962363                 | 5.117339591  |
|                                                                 | C11  | -4.947735751 | -1.237231246                 | 7.281716398  |
|                                                                 | C12  | -3.885133107 | -1.812513504                 | 8.229522525  |
|                                                                 | C13  | -2.891932090 | -3.846464297                 | 9.173569206  |
|                                                                 | C14  | -1.415589991 | -4.104940764                 | 8.843842827  |
|                                                                 | C15  | 0.237185520  | -4.699170018                 | 7.117812770  |

|     |               |               |              |
|-----|---------------|---------------|--------------|
| C16 | 0.962792251   | -3.564102574  | 6.390909710  |
| C17 | 0.669537458   | -1.313802553  | 5.392615873  |
| C18 | 0.787021688   | -0.086593742  | 6.310664676  |
| C19 | -0.158142990  | -1.094191192  | 4.108168663  |
| C20 | 0.332118036   | 0.146923945   | 3.351437850  |
| C21 | -0.123197806  | -2.345782293  | 3.227201847  |
| C22 | -0.386802056  | 1.618567093   | 7.634458425  |
| C23 | -0.032748760  | 1.263275716   | 9.090789835  |
| C24 | -1.724875528  | 2.382738639   | 7.499829442  |
| C25 | -1.807972421  | 3.539244752   | 8.501590988  |
| C26 | -1.904092372  | 2.900579520   | 6.066013213  |
| C27 | -0.447471745  | -0.110500916  | 11.044731593 |
| C28 | 1.014957994   | -0.397395460  | 11.322018738 |
| C29 | 5.881751941   | -11.626740449 | 3.689987025  |
| C30 | 6.519423088   | -10.347941135 | 3.159693324  |
| C31 | 6.823601965   | -7.937319293  | 3.684101215  |
| C32 | 8.051440643   | -7.551473685  | 4.527995772  |
| C33 | 5.652203709   | -6.974105137  | 3.935198272  |
| C34 | 5.994838500   | -5.533511418  | 3.568166483  |
| C35 | 4.757595756   | -4.641728777  | 3.520820935  |
| C36 | 4.898534991   | -2.137225183  | 3.514435238  |
| C37 | 10.290092677  | -6.551949614  | 4.464320033  |
| C38 | 10.467726825  | -5.050257679  | 4.465200272  |
| C39 | -5.320830990  | -2.666286783  | -1.588800276 |
| C40 | -5.692644145  | -1.235148768  | -1.156479792 |
| C41 | -3.784909960  | -2.806670642  | -1.520875733 |
| C42 | -3.231182397  | -4.241496488  | -1.628126769 |
| C43 | -2.967934607  | -4.745724734  | -3.047226302 |
| C44 | -6.163179402  | 1.006279653   | -2.066420365 |
| C45 | -7.251014580  | 1.468881404   | -1.086957043 |
| C46 | -6.340383643  | 1.610911847   | -3.464957991 |
| C47 | -9.409244446  | 0.959859395   | -0.042005422 |
| C48 | -9.015426993  | 0.959999729   | 1.438458250  |
| C49 | -7.317204393  | 0.407803055   | 3.116516499  |
| C50 | -6.130475966  | 1.348847339   | 3.331114211  |
| C51 | -4.601071741  | 3.020274195   | 2.404301491  |
| C52 | -5.027953427  | 4.348116678   | 3.082019680  |
| C53 | -3.992866398  | 3.419818736   | 1.050658081  |
| C54 | -3.329391814  | 2.360871485   | 0.225105749  |
| C55 | -2.781157468  | 1.124366178   | 0.470158061  |
| C56 | -2.426515903  | 1.590243755   | -1.672298118 |
| C57 | -6.836885123  | 6.025236574   | 3.250658657  |
| C58 | -6.713036520  | 6.186229560   | 4.764289084  |
| C59 | -8.318891100  | 6.086921092   | 2.811890257  |
| C60 | -8.928610250  | 7.453298108   | 2.687906825  |
| C61 | -8.863318953  | 8.553937125   | 3.520326904  |
| C62 | -10.150198898 | 8.987477457   | 1.769388441  |
| C63 | 9.251943088   | 1.658552181   | 3.409912883  |
| C64 | 10.298367969  | 0.573896804   | 3.234572200  |
| C65 | 7.865014573   | 0.993716806   | 3.222962078  |
| C66 | 6.722427388   | 1.958340539   | 3.435547477  |
| C67 | 6.136785432   | 2.136709230   | 4.701327322  |
| C68 | 6.221576086   | 2.723467637   | 2.366423583  |
| C69 | 5.087506271   | 3.042975967   | 4.897828258  |
| C70 | 5.191777077   | 3.645743219   | 2.550693486  |
| C71 | 4.619477159   | 3.799547124   | 3.815738633  |
| C72 | 5.386529335   | 6.867462314   | -1.399558518 |
| C73 | 4.320044182   | 7.955784367   | -1.608513956 |
| C74 | 4.732683069   | 5.539844061   | -1.026408840 |
| C75 | 3.309217292   | 9.540915185   | -3.209272354 |
| C76 | 1.832878242   | 9.168804253   | -3.373841739 |
| C77 | 0.210227678   | 7.271568869   | -3.330102763 |
| C78 | -0.260546744  | 6.925734929   | -1.892709401 |
| C79 | 0.245784458   | 6.028952443   | -4.247742202 |
| C80 | -1.003957941  | 5.147497026   | -4.359557890 |
| C81 | -2.151987338  | 5.684757743   | -5.230526148 |
| C82 | -3.683688702  | 7.592587005   | -4.749430831 |
| C83 | 0.264362883   | 5.967970876   | 0.302375192  |
| C84 | 0.104217290   | 7.178543086   | 1.231127570  |
| C85 | 1.273877091   | 5.002932776   | 0.959595452  |
| C86 | 1.182048787   | 9.241857790   | 1.984311118  |
| C87 | 0.550837802   | 10.592882735  | 1.679083363  |
| C88 | -0.845032249  | 11.876505877  | 0.146039599  |
| C89 | -2.122569771  | 12.428855015  | 0.821394835  |
| C90 | -0.989474333  | 11.889160036  | -1.378228410 |
| C91 | -2.145221092  | 11.045489241  | -1.902995066 |
| C92 | -4.070985581  | 11.945692609  | 2.224059947  |
| C93 | -3.989739524  | 13.053181289  | 3.266522933  |
| C94 | -4.731150630  | 10.681030105  | 2.839676081  |
| C95 | -4.968748225  | 9.606493480   | 1.803816795  |

|       |              |               |              |
|-------|--------------|---------------|--------------|
| C96   | -6.139137933 | 9.613597449   | 1.030342050  |
| C97   | -4.009376269 | 8.614955708   | 1.543767025  |
| C98   | -6.338704785 | 8.677724361   | 0.014128816  |
| C99   | -4.180803376 | 7.684069353   | 0.514593107  |
| C100  | -5.345647626 | 7.732689514   | -0.245331598 |
| C101  | 4.081554416  | -3.990439210  | -9.002013102 |
| C102  | 2.656964000  | -3.730995739  | -8.544195681 |
| C103  | 1.205612322  | -2.177607116  | -7.262872985 |
| C104  | 0.703810067  | -0.831434303  | -7.803377221 |
| C105  | 1.106503283  | 1.599254774   | -7.774182458 |
| C106  | 2.291439457  | 2.541187220   | -7.956045345 |
| C107  | 4.580747101  | 3.174266182   | -7.450965968 |
| C108  | 5.105520210  | 3.398997610   | -8.855624630 |
| C109  | -2.743649357 | -3.503529976  | -9.160291562 |
| C110  | -3.764326617 | -2.403671950  | -8.844151916 |
| C111  | -2.251558060 | -4.165000725  | -7.853969183 |
| C112  | -1.536733705 | -5.498007819  | -8.143584508 |
| C113  | -0.869190605 | -6.026022976  | -6.894551369 |
| C114  | -4.155972512 | -0.081504733  | -8.200946327 |
| C115  | -3.656866308 | 1.200094110   | -8.837594478 |
| C116  | -4.578239354 | 0.059435323   | -6.717539637 |
| C117  | -3.355651620 | 0.088915251   | -5.849479221 |
| C118  | -2.635931791 | 1.281961247   | -5.669094531 |
| C119  | -2.813579518 | -1.117974547  | -5.377178618 |
| C120  | -1.352678248 | 1.246008142   | -5.114322097 |
| C121  | -1.537429676 | -1.148456010  | -4.814055532 |
| C122  | -0.787974055 | 0.028568537   | -4.726700371 |
| C123  | 7.892327830  | -6.271405536  | -4.792876872 |
| C124  | 9.079766629  | -6.343490540  | -3.817145702 |
| C125  | 6.581447899  | -6.566610094  | -4.048513868 |
| C126  | 5.312143937  | -6.343981334  | -4.807821359 |
| C127  | 4.932188652  | -6.918572094  | -6.003427854 |
| C128  | 3.207317702  | -5.830390139  | -5.141441416 |
| C129  | 10.308070869 | -7.554355757  | -2.117037410 |
| C130  | 11.663332011 | -7.336092324  | -2.753353155 |
| C131  | 0.613962156  | -6.899657256  | -0.111503008 |
| C132  | 2.111248512  | -6.933994381  | 0.185633312  |
| C133  | 3.008565049  | -7.052209041  | -1.080731988 |
| C134  | 2.912447332  | -8.487401136  | -1.667108650 |
| C135  | 3.951524296  | -8.833735531  | -2.737376440 |
| C136  | 3.979012861  | -10.325874516 | -3.137676122 |
| C137  | 4.476376901  | -6.798566669  | -0.700919197 |
| C138  | 3.599357723  | -0.688650324  | -2.240557868 |
| Fe139 | 3.750849165  | -1.984855322  | -3.702257375 |
| Fe140 | 2.130825397  | 0.607584794   | -1.336987583 |
| Fe141 | 4.983395718  | 0.495229954   | -1.464999086 |
| Fe142 | 3.770543098  | 0.535027618   | -3.729127445 |
| Fe143 | 3.740571091  | 2.743114442   | -2.404623116 |
| Fe144 | 4.874420084  | -2.044459274  | -1.421271281 |
| Fe145 | 2.152406763  | -2.247033145  | -1.294476489 |
| H146  | -6.256438398 | -7.471901563  | 0.384439190  |
| H147  | -6.435079300 | -6.487025746  | -0.904556118 |
| H148  | -9.709591695 | -4.830174769  | 1.350341162  |
| H149  | -8.767120961 | -6.149514868  | -0.418853984 |
| H150  | -8.604126985 | -7.257972198  | 0.939634658  |
| H151  | -7.977466009 | -2.721129516  | 2.076221595  |
| H152  | -8.754423931 | -5.630537566  | 3.961435812  |
| H153  | -9.603688766 | -3.003914212  | 2.735239041  |
| H154  | -8.004339696 | -6.300816246  | 6.057699488  |
| H155  | -6.110814345 | -5.857910473  | 3.667229171  |
| H156  | -7.813568245 | -4.595274165  | 6.520054152  |
| H157  | -2.885255811 | -1.851010982  | 3.293146554  |
| H158  | -5.057216751 | -3.712108111  | 3.126887057  |
| H159  | -3.841870098 | -6.233204407  | 3.332749347  |
| H160  | -4.792701588 | -0.150579879  | 7.252337099  |
| H161  | -5.690941686 | -2.318660064  | 5.566808223  |
| H162  | -3.569495605 | -6.348002093  | 5.089693388  |
| H163  | -4.606804147 | -1.466102747  | 3.074300469  |
| H164  | -4.278689242 | -3.718935957  | 7.546975545  |
| H165  | -5.940594979 | -1.440241559  | 7.707056967  |
| H166  | -0.487196849 | -3.226798875  | 3.769716514  |
| H167  | -0.771587647 | -2.208107655  | 2.347342621  |
| H168  | 0.888354098  | -2.539096672  | 2.844090524  |
| H169  | -1.198931125 | -0.910845773  | 4.414614470  |
| H170  | -3.358840184 | -4.821851322  | 9.375692612  |
| H171  | -1.902619615 | 2.087127675   | 5.327507249  |
| H172  | -1.484357839 | -0.233887591  | 9.185692760  |
| H173  | -1.768305521 | 3.194286357   | 9.544550314  |
| H174  | 1.364813857  | 0.019049798   | 2.990921552  |
| H175  | 0.289768497  | 1.053504554   | 3.975294306  |

|      |               |              |               |
|------|---------------|--------------|---------------|
| H176 | 9.318739278   | 2.015840272  | 4.455063473   |
| H177 | -2.861095372  | 3.433118201  | 5.968380932   |
| H178 | -2.752375034  | 4.084316277  | 8.358885253   |
| H179 | -1.095363205  | 3.604814302  | 5.809826221   |
| H180 | -0.978719041  | 4.247749393  | 8.346841604   |
| H181 | -2.542345788  | 1.672073962  | 7.720342863   |
| H182 | 0.434098076   | 2.274320034  | 7.308050446   |
| H183 | -1.273946413  | 0.080659751  | 6.422473518   |
| H184 | -0.299063301  | 0.327982113  | 2.467811704   |
| H185 | 1.575791704   | 4.246065268  | 0.220492082   |
| H186 | 0.746631645   | 4.497895939  | 1.781503757   |
| H187 | 2.675964788   | 5.313091548  | 2.309484648   |
| H188 | 3.226158234   | 4.679454512  | 4.843041704   |
| H189 | 4.805651092   | 4.221997052  | 1.710020038   |
| H190 | 6.628618091   | 2.578237141  | 1.363161785   |
| H191 | 6.497904358   | 1.551584366  | 5.552087976   |
| H192 | -0.771865439  | -2.516769212 | 6.412666983   |
| H193 | 0.232113930   | -5.567255500 | 6.441886925   |
| H194 | 0.832648864   | -4.964192586 | 8.001481039   |
| H195 | -1.857300725  | -4.440430945 | 6.833698074   |
| H196 | -2.899658940  | -3.259816346 | 10.100034217  |
| H197 | 4.632367029   | 3.156052339  | 5.885774020   |
| H198 | 1.701396219   | -1.541752982 | 5.101459981   |
| H199 | -0.787355915  | 0.678868609  | 11.733968015  |
| H200 | -1.008467748  | -1.028497298 | 11.278382111  |
| H201 | 1.607217107   | -0.748705203 | 10.445069725  |
| H202 | 11.172504286  | -7.021877085 | 4.003308306   |
| H203 | -1.732128005  | -5.985452984 | -4.111265227  |
| H204 | 1.215092263   | -6.012837195 | -1.712181746  |
| H205 | -2.277623336  | -6.239914403 | -8.475154417  |
| H206 | -0.797005447  | -5.364662406 | -8.946184826  |
| H207 | -3.101628650  | -4.354843848 | -7.180248989  |
| H208 | -2.979976104  | 1.049837788  | -9.710715017  |
| H209 | -3.339286083  | -4.254247841 | -9.702953333  |
| H210 | -3.336121168  | -2.175686520 | -2.305436728  |
| H211 | -3.928640259  | -4.955623584 | -1.156677679  |
| H212 | -2.249504257  | -1.040140512 | -8.440181423  |
| H213 | -5.081953618  | -0.309499057 | -8.771026867  |
| H214 | -1.030559822  | -2.417365272 | -9.610250144  |
| H215 | -1.305904731  | -5.829544147 | -2.408341680  |
| H216 | -1.584422983  | -3.465621258 | -7.326554307  |
| H217 | -1.196329467  | -3.808829039 | -10.476132294 |
| H218 | -6.732911317  | -3.439642996 | -2.884181672  |
| H219 | -3.464086942  | -2.394481904 | -0.553187785  |
| H220 | 0.821754277   | -5.283057358 | -7.558266618  |
| H221 | -2.299678744  | -4.307580440 | -1.047925379  |
| H222 | -3.842478258  | 2.577192853  | 3.064457406   |
| H223 | -2.737850831  | 0.540078605  | 1.380802040   |
| H224 | -8.125431837  | 0.754247672  | 3.775393733   |
| H225 | -7.260054046  | -0.080982814 | 1.039793201   |
| H226 | -6.937124058  | 4.064761366  | 2.387793700   |
| H227 | -8.335052604  | 8.736495740  | 4.448962097   |
| H228 | -6.854584383  | 5.232589999  | 5.329828001   |
| H229 | -8.919751064  | 5.447644702  | 3.482699711   |
| H230 | -6.259154876  | 6.825762829  | 2.762376589   |
| H231 | -10.805731355 | 9.544255886  | 1.105746007   |
| H232 | -3.251825764  | 4.208782605  | 1.260780001   |
| H233 | -4.781418164  | 3.885230199  | 0.437487510   |
| H234 | -9.806939906  | 10.457022350 | 3.272119660   |
| H235 | -8.382773662  | 5.631337416  | 1.811067081   |
| H236 | -6.185437751  | 2.010075457  | 1.356322749   |
| H237 | -7.024753208  | -0.590586852 | 3.473604221   |
| H238 | -9.839545178  | 1.951302729  | -0.242121746  |
| H239 | -2.082732035  | 1.508926328  | -2.700436269  |
| H240 | -10.203743854 | 0.216258543  | -0.187462817  |
| H241 | 10.291229500  | 3.257444628  | 2.661560740   |
| H242 | 8.681830770   | 3.341367720  | 2.393570546   |
| H243 | 1.547329524   | 5.984160182  | -1.427846851  |
| H244 | -0.715951525  | 5.470325646  | 0.272199486   |
| H245 | 1.716336769   | 8.057670839  | 0.317401110   |
| H246 | -3.443121023  | 3.465811385  | -1.627262328  |
| H247 | -5.115270916  | 4.160431448  | -2.798811410  |
| H248 | -6.692205663  | 3.390661605  | -4.210950796  |
| H249 | -4.789649350  | 5.390831669  | -1.843034623  |
| H250 | -5.509088319  | 1.260334848  | -4.098860686  |
| H251 | -7.291469268  | 1.270215898  | -3.902839367  |
| H252 | -0.035908282  | 11.601474738 | -1.842983478  |
| H253 | -1.198989201  | 12.929604077 | -1.672347582  |
| H254 | -0.909703286  | 10.217967762 | -3.347333629  |
| H255 | -2.596702901  | 9.706680708  | -3.344275642  |

|      |              |               |               |
|------|--------------|---------------|---------------|
| H256 | -3.765445052 | 9.153183409   | -6.074335945  |
| H257 | -2.645468248 | 4.852437242   | -5.755209497  |
| H258 | -7.260698520 | 8.688776816   | -0.573125429  |
| H259 | -3.103981290 | 8.545780048   | 2.152170374   |
| H260 | -4.664821334 | 7.782346108   | -2.949026260  |
| H261 | 1.068064462  | 5.385266142   | -3.895523947  |
| H262 | 2.339431096  | 7.205680916   | -3.226851284  |
| H263 | -1.385651957 | 4.870863570   | -3.364456187  |
| H264 | -8.347061109 | -0.202869944  | -1.501903036  |
| H265 | 3.645578465  | 10.006577949  | -4.145240528  |
| H266 | -6.065380555 | -0.944674762  | -3.093560657  |
| H267 | 0.538368105  | 6.371602103   | -5.253753862  |
| H268 | -3.395677579 | 6.960703789   | 0.291458466   |
| H269 | 3.344853823  | 10.304280981  | -2.418411354  |
| H270 | -3.059997339 | 7.708920026   | -6.706943733  |
| H271 | -5.115335742 | 8.932335887   | -4.164818669  |
| H272 | -5.163392844 | -3.524876084  | -3.453935211  |
| H273 | -5.754313178 | -3.327927653  | -0.815589495  |
| H274 | -6.913825323 | 10.359393496  | 1.223654455   |
| H275 | -5.230833066 | 1.393339370   | -1.630404525  |
| H276 | -0.490374799 | 8.025225871   | -3.702345685  |
| H277 | -1.740561145 | 6.350963761   | -5.999366986  |
| H278 | -0.668953890 | 4.210653667   | -4.826033594  |
| H279 | -3.590510461 | 5.869693461   | -3.667626865  |
| H280 | 0.782276369  | 8.900152012   | 2.950887229   |
| H281 | -0.463192668 | 9.756246163   | 0.112527761   |
| H282 | -0.076408245 | 12.620733715  | 0.405675754   |
| H283 | 2.260666961  | 9.412948790   | 2.100998149   |
| H284 | -2.443541489 | 10.645713448  | 1.733481508   |
| H285 | 4.603214980  | -3.036144343  | -9.168276616  |
| H286 | 4.583173936  | -4.483317173  | -8.140407294  |
| H287 | 7.879310169  | -5.228531762  | -5.143103603  |
| H288 | 5.038304484  | -5.120770857  | -10.402423330 |
| H289 | 3.503548691  | -5.605333691  | -10.098914148 |
| H290 | 5.518315857  | 4.784441256   | -0.909949493  |
| H291 | 5.791124285  | 7.486022247   | 0.502848883   |
| H292 | 4.830093697  | 8.092490948   | -3.598328282  |
| H293 | 4.176814978  | 5.649376697   | -0.084783043  |
| H294 | 6.842025399  | 8.080617781   | -0.601249025  |
| H295 | 5.411899114  | 2.773673608   | -6.848127523  |
| H296 | 5.959840181  | 6.733485245   | -2.330098929  |
| H297 | 5.347315444  | -7.045232306  | 4.992470977   |
| H298 | 7.084246455  | -7.915749814  | 2.617974135   |
| H299 | 3.623936468  | 1.356806093   | -6.865707472  |
| H300 | 5.090222114  | -0.115125745  | 3.222505098   |
| H301 | 0.565582554  | 1.555338317   | -8.727158629  |
| H302 | -1.111767604 | -2.085084435  | -4.446121192  |
| H303 | 0.434565165  | 2.082400057   | -7.044245904  |
| H304 | 4.325280350  | -4.519791065  | 4.520824199   |
| H305 | 2.070449922  | 0.061348681   | -6.592088919  |
| H306 | 3.983101508  | -5.095329889  | 2.881108388   |
| H307 | 4.808702772  | -7.325639475  | 3.319529964   |
| H308 | 6.469760425  | -5.513722615  | 2.576178760   |
| H309 | 6.717082522  | -5.105395358  | 4.280651829   |
| H310 | -5.223944641 | -0.794628280  | -6.466785087  |
| H311 | 5.946738990  | -9.505298887  | 4.881219963   |
| H312 | 4.979332199  | -11.789948796 | 3.081832361   |
| H313 | 0.212366111  | -0.003603445  | -4.300552908  |
| H314 | 6.270546464  | -11.881707507 | 5.696766444   |
| H315 | 4.707991765  | -12.159111784 | 5.294873299   |
| H316 | 5.588833857  | -3.364418907  | 2.061189138   |
| H317 | -0.775054737 | 2.163845474   | -4.989493331  |
| H318 | -3.385107224 | -2.043896968  | -5.473987245  |
| H319 | 7.661515765  | -9.932781779  | -1.681028773  |
| H320 | 6.588426570  | -7.621345792  | -3.723049752  |
| H321 | 6.646825109  | -8.161784792  | -0.120014218  |
| H322 | 6.784398776  | -10.518017661 | -2.820999200  |
| H323 | 4.887755346  | 2.572869472   | -9.574094720  |
| H324 | 6.372561221  | -5.032032205  | -0.225114594  |
| H325 | 2.318425851  | -7.746744209  | 0.891879140   |
| H326 | 3.274479444  | -1.991363196  | -7.671791823  |
| H327 | 3.034479082  | -9.178714452  | -0.818737642  |
| H328 | 3.011129428  | -6.899359312  | -6.949106710  |
| H329 | 2.194371225  | -5.464299319  | -5.028920619  |
| H330 | 6.575988199  | -12.450494250 | 3.450836307   |
| H331 | 5.753772837  | -1.084724024  | 1.940135039   |
| H332 | 8.366070646  | -5.794491554  | 0.800465074   |
| H333 | 7.253898435  | -3.760747162  | -0.116249240  |
| H334 | 8.983954388  | -6.864197268  | 2.791263690   |
| H335 | 3.664281841  | -2.726773329  | 5.101266359   |

|       |              |               |               |
|-------|--------------|---------------|---------------|
| H336  | 3.749296008  | -8.252499144  | -3.649940365  |
| H337  | 4.959299967  | -8.556644189  | -2.400152980  |
| H338  | 1.897049961  | -8.640059934  | -2.063584117  |
| H339  | 1.338233557  | -2.125113364  | -6.170853881  |
| H340  | -3.066467534 | 2.225227822   | -6.013632075  |
| H341  | -5.171429818 | 0.982221292   | -6.635040918  |
| H342  | 2.338973743  | -5.980186376  | 0.692014811   |
| H343  | 8.520637413  | -7.327766085  | 0.577573483   |
| H344  | 7.413889674  | -9.250319783  | 0.659877769   |
| H345  | 4.118660968  | -1.064334008  | 5.067998913   |
| H346  | 5.484207728  | -7.546020291  | -6.692491572  |
| H347  | 6.554887474  | -5.971359113  | -3.128787299  |
| H348  | 0.458311871  | -2.937222910  | -7.498045437  |
| H349  | 4.287051563  | 4.142067600   | -7.015577539  |
| H350  | 7.792730560  | 0.158653110   | 3.935265240   |
| H351  | 7.818167253  | 0.572195715   | 2.206177572   |
| H352  | 8.936730622  | -6.882276729  | -6.448249332  |
| H353  | 8.173458377  | -8.111424255  | -5.683695214  |
| H354  | 10.305578972 | -8.566630389  | -1.684100301  |
| H355  | 8.575433747  | -8.268330762  | -3.134726844  |
| H356  | 11.706870315 | -7.565109838  | -3.845777546  |
| H357  | 10.170531744 | -6.843064980  | -1.287052433  |
| H358  | 10.565773525 | 0.362493679   | 2.170655152   |
| H359  | -2.981271833 | 13.209265906  | 3.716908121   |
| H360  | 10.249796395 | -6.872067033  | 5.520218034   |
| H361  | 9.521466640  | -4.459944586  | 4.400562311   |
| H362  | -4.706000664 | 12.313627164  | 1.400810427   |
| H363  | -4.094014631 | 10.302484847  | 3.654345746   |
| H364  | -5.682864100 | 10.999012951  | 3.289292822   |
| H365  | 1.164039285  | -3.303418384  | -0.920308522  |
| H366  | 3.284555618  | -0.880031295  | 0.487679841   |
| H367  | -6.430117002 | 6.807847623   | -1.572414127  |
| H368  | 0.564944287  | -1.347658024  | 0.247132646   |
| H369  | -1.578353415 | -0.130500829  | -0.865807931  |
| Mo370 | 3.823856674  | -4.358048847  | -2.346829718  |
| N371  | -6.933908865 | -7.156788181  | -0.314141077  |
| N372  | -8.791342793 | -4.645075166  | 1.747085119   |
| N373  | -8.196348734 | -4.956162577  | 4.479613149   |
| N374  | -5.518796647 | -5.817331574  | 4.498189609   |
| N375  | -4.243825300 | -3.420098233  | 3.665894486   |
| N376  | -4.899335581 | -1.787337558  | 5.937970318   |
| N377  | -3.694533353 | -3.156838525  | 8.172232537   |
| N378  | -1.118999922 | -4.395747186  | 7.543607185   |
| N379  | 0.210535044  | -2.467401930  | 6.149143130   |
| N380  | -0.381073953 | 0.438663342   | 6.769993063   |
| N381  | -0.696717916 | 0.220977560   | 9.653569354   |
| N382  | 5.504270792  | -11.548283143 | 5.107673004   |
| N383  | 6.411173580  | -9.294422262  | 3.991573057   |
| N384  | 5.109043157  | -3.334806091  | 2.964718306   |
| N385  | 4.267798487  | -2.000113632  | 4.700149128   |
| N386  | 5.353888559  | -1.036889676  | 2.887582993   |
| N387  | 9.064184026  | -6.984476921  | 3.824980294   |
| N388  | -5.842939845 | -2.939410503  | -2.933980232  |
| N389  | -1.927726813 | -5.588605386  | -3.186110950  |
| N390  | -6.069618716 | -0.438025506  | -2.192091803  |
| N391  | -8.337801101 | 0.670676878   | -0.979754069  |
| N392  | -7.846791973 | 0.342109926   | 1.767493228   |
| N393  | -5.697680463 | 2.073676671   | 2.254255012   |
| N394  | -3.092914728 | 2.616031904   | -1.121861263  |
| N395  | -2.241870168 | 0.669048833   | -0.720652676  |
| N396  | -6.316820590 | 4.715995537   | 2.863067133   |
| N397  | -9.735604309 | 7.737693740   | 1.597227583   |
| N398  | -9.643066027 | 9.518242483   | 2.918068635   |
| N399  | 9.476733158  | 2.696346451   | 2.400359337   |
| N400  | 6.330334898  | 7.235652941   | -0.332351043  |
| N401  | 4.208533396  | 8.449809998   | -2.877542921  |
| N402  | 1.550655468  | 7.849689152   | -3.340945862  |
| N403  | -3.171201660 | 6.398898805   | -4.454963075  |
| N404  | -3.380918952 | 8.230041861   | -5.897842583  |
| N405  | -4.449116142 | 8.236706027   | -3.840071279  |
| N406  | 0.645319547  | 6.331762684   | -1.064570840  |
| N407  | 0.957321156  | 8.213590123   | 0.986201954   |
| N408  | -0.366198468 | 10.608002239  | 0.664752225   |
| N409  | -1.883565913 | 10.375021182  | -3.058955124  |
| N410  | -2.747969043 | 11.615798922  | 1.709363148   |
| N411  | 4.089386266  | -4.776882890  | -10.237117345 |
| N412  | 2.460039862  | -2.568208346  | -7.889538427  |
| N413  | 1.402059787  | 0.238191263   | -7.360773170  |
| N414  | 3.488113415  | 2.214932717   | -7.406008149  |
| N415  | -1.713497479 | -3.018006004  | -10.086899572 |

|      |              |               |              |
|------|--------------|---------------|--------------|
| N416 | -3.262177604 | -1.184986386  | -8.493218959 |
| N417 | 8.064772244  | -7.134799477  | -5.974507648 |
| N418 | 4.216600760  | -5.654120582  | -4.287717356 |
| N419 | 3.610618863  | -6.581237681  | -6.192089928 |
| N420 | 9.231222391  | -7.482869926  | -3.088795861 |
| N421 | 0.129356305  | 2.262433043   | 0.037393173  |
| N422 | 2.347706424  | -0.758224556  | 0.077650788  |
| N423 | 0.887529367  | 1.630007852   | -0.504229523 |
| N424 | 1.504901304  | -1.654688106  | 0.573802663  |
| O425 | -6.561371340 | -5.098633133  | 1.671377743  |
| O426 | -7.324616857 | -2.848283101  | 4.513143792  |
| O427 | -5.375582867 | -5.241641468  | 6.703791093  |
| O428 | -2.496797923 | -4.058850621  | 4.977917388  |
| O429 | -3.010007452 | -0.613847823  | 5.479862751  |
| O430 | -3.283990427 | -1.074973631  | 9.030554528  |
| O431 | -0.571062837 | -4.087115206  | 9.748537999  |
| O432 | 2.154901614  | -3.700408710  | 6.053757616  |
| O433 | 1.899809412  | 0.371253169   | 6.614575552  |
| O434 | 0.825224006  | 1.903800978   | 9.720542704  |
| O435 | 1.511647883  | -0.314945690  | 12.435051395 |
| O436 | 7.057288890  | -10.340960496 | 2.033556786  |
| O437 | 8.071947751  | -7.741204773  | 5.756809883  |
| O438 | 11.554528634 | -4.501066015  | 4.551871882  |
| O439 | -5.637532369 | -0.840126929  | 0.024246242  |
| O440 | -3.692567698 | -4.417930789  | -4.015012560 |
| O441 | -7.108017487 | 2.513807357   | -0.426903393 |
| O442 | -6.335535781 | 3.049155065   | -3.371667714 |
| O443 | -9.765134416 | 1.502154764   | 2.261736831  |
| O444 | -5.606106809 | 1.429020383   | 4.446540418  |
| O445 | -4.215431653 | 5.048422646   | 3.693917219  |
| O446 | -6.525687522 | 7.247287302   | 5.333507311  |
| O447 | 10.811735282 | -0.042249415  | 4.157155800  |
| O448 | 3.578169525  | 4.700449317   | 3.934172021  |
| O449 | 3.608285208  | 8.375626642   | -0.679773484 |
| O450 | 0.992478982  | 10.074526580  | -3.532450167 |
| O451 | -1.420915135 | 7.185641703   | -1.539338180 |
| O452 | -0.705238115 | 7.159673642   | 2.167148089  |
| O453 | 2.424842258  | 5.697839475   | 1.445287742  |
| O454 | 0.855501679  | 11.598813632  | 2.331020367  |
| O455 | -2.500139172 | 13.586000047  | 0.588906391  |
| O456 | -3.254199272 | 11.027653035  | -1.349738341 |
| O457 | -4.958347920 | 13.707298241  | 3.616710048  |
| O458 | -5.486440380 | 6.832928742   | -1.321344702 |
| O459 | 1.755275991  | -4.581006724  | -8.740534306 |
| O460 | -0.252090905 | -0.752736088  | -8.602029337 |
| O461 | 2.119639597  | 3.613489675   | -8.558889215 |
| O462 | 5.751552296  | 4.380867758   | -9.182823476 |
| O463 | -4.986244680 | -2.623226808  | -8.888771089 |
| O464 | -1.472366441 | -6.623616723  | -6.010042018 |
| O465 | 0.447738246  | -5.764550548  | -6.757096193 |
| O466 | -3.996343817 | 2.321133984   | -8.486159915 |
| O467 | 9.896337915  | -5.407616076  | -3.712337327 |
| O468 | 12.660277548 | -6.998868349  | -2.131832377 |
| O469 | 0.276921062  | -6.248502707  | -1.233812243 |
| O470 | -0.231454786 | -7.375763172  | 0.642606518  |
| O471 | 5.132116836  | -10.853654861 | -3.326361790 |
| O472 | 2.871078410  | -10.914592819 | -3.284384423 |
| O473 | 5.088374044  | -5.841603171  | -1.353521330 |
| O474 | 5.040120058  | -7.501111448  | 0.157866136  |
| O475 | 2.579920725  | -6.054887759  | -2.008718214 |
| O476 | 8.957485052  | -6.552725891  | 1.029180579  |
| O477 | 6.984586223  | -4.551690179  | 0.388139743  |
| O478 | -4.378921905 | 4.735588984   | -2.457772944 |
| O479 | 7.739766316  | -10.420505788 | -2.531085487 |
| O480 | 7.524858289  | -8.626602786  | -0.102461482 |
| S481 | 3.541678154  | 4.962744070   | -2.314961544 |
| S482 | 1.988153895  | 1.826228151   | -3.374687429 |
| S483 | 1.947539784  | -3.301143615  | -3.305460146 |
| S484 | 3.751890978  | 1.980358591   | -0.310920343 |
| S485 | 0.440210451  | -0.883791164  | -1.973319365 |
| S486 | 3.930743344  | -0.722382121  | -5.521432807 |
| S487 | 3.680184643  | -3.492713183  | -0.177789970 |
| S488 | 5.564884826  | 1.772681081   | -3.235954901 |
| S489 | 5.635753885  | -3.097712091  | -3.225858844 |
| S490 | 6.339261496  | -0.830383982  | -0.340563649 |
| end  |              |               |              |

## Fe2-NH-NH-b to Fe2-brNH-NH-Fe6

Figure 8, scheme C

| transition state (S=3/2) | bm52exp335fe2fe2fe6tg_1_53285.62 |               |               |              |
|--------------------------|----------------------------------|---------------|---------------|--------------|
| Fe( 139) -2.358          | C1                               | -7.753016861  | -5.460934552  | -0.117222561 |
| Fe( 140) 0.099           | C2                               | -8.000481435  | -6.488563657  | -1.227917650 |
| Fe( 141) -2.512          | C3                               | -8.771352435  | -3.727968237  | 1.294942905  |
| Fe( 142) 2.559           | C4                               | -8.272833524  | -4.148434100  | 2.674641962  |
| Fe( 143) 2.553           | C5                               | -8.020704886  | -5.944760863  | 4.314572645  |
| Fe( 144) 2.275           | C6                               | -6.495410678  | -6.050711423  | 4.399583148  |
| Fe( 145) -0.074          | C7                               | -4.385730071  | -6.201725809  | 3.180724081  |
|                          | C8                               | -3.873040364  | -4.784029742  | 3.446252283  |
|                          | C9                               | -4.206099248  | -2.388624656  | 3.022956106  |
|                          | C10                              | -4.365926294  | -1.953475790  | 4.486968054  |
|                          | C11                              | -5.629962721  | -2.033988174  | 6.537705343  |
|                          | C12                              | -4.653027249  | -2.698123490  | 7.519112884  |
|                          | C13                              | -3.724231320  | -4.822298621  | 8.328105989  |
|                          | C14                              | -2.216064795  | -5.032603507  | 8.129428475  |
|                          | C15                              | -0.399156595  | -5.514934528  | 6.538020047  |
|                          | C16                              | 0.380139539   | -4.298185933  | 6.028626718  |
|                          | C17                              | 0.132326353   | -1.960528858  | 5.236741089  |
|                          | C18                              | 0.163151279   | -0.844234860  | 6.294681715  |
|                          | C19                              | -0.603644968  | -1.605511448  | 3.928409954  |
|                          | C20                              | -0.123697214  | -0.256492993  | 3.383428999  |
|                          | C21                              | -0.439141096  | -2.737778285  | 2.908409744  |
|                          | C22                              | -1.136918304  | 0.713552256   | 7.685713912  |
|                          | C23                              | -0.920616218  | 0.198628273   | 9.122845935  |
|                          | C24                              | -2.460434381  | 1.495743287   | 7.511283489  |
|                          | C25                              | -2.630543034  | 2.546103019   | 8.613788082  |
|                          | C26                              | -2.518668876  | 2.155683088   | 6.126372113  |
|                          | C27                              | -1.521642883  | -1.375338864  | 10.870904467 |
|                          | C28                              | -0.079614996  | -1.664142371  | 11.240719304 |
|                          | C29                              | 5.597254610   | -11.976912255 | 2.926589202  |
|                          | C30                              | 6.278975697   | -10.652522758 | 2.602541722  |
|                          | C31                              | 6.506242856   | -8.309137126  | 3.410555232  |
|                          | C32                              | 7.633589570   | -8.023181801  | 4.418711100  |
|                          | C33                              | 5.305996280   | -7.376822082  | 3.646450925  |
|                          | C34                              | 5.670650160   | -5.905468093  | 3.474185968  |
|                          | C35                              | 4.441719492   | -5.001759005  | 3.446095135  |
|                          | C36                              | 4.541979760   | -2.507986853  | 3.705321029  |
|                          | C37                              | 9.851431994   | -7.024708637  | 4.716548137  |
|                          | C38                              | 10.029501019  | -5.530393596  | 4.870725504  |
|                          | C39                              | -5.106729935  | -2.470283688  | -2.395581694 |
|                          | C40                              | -5.536953447  | -1.098221778  | -1.842332550 |
|                          | C41                              | -3.580059797  | -2.611854455  | -2.201447732 |
|                          | C42                              | -3.006297630  | -4.026755994  | -2.415301403 |
|                          | C43                              | -2.597892799  | -4.366488808  | -3.848438083 |
|                          | C44                              | -5.944891007  | 1.232144348   | -2.537143617 |
|                          | C45                              | -7.127139769  | 1.570352859   | -1.619462516 |
|                          | C46                              | -6.011461946  | 1.991322091   | -3.868936697 |
|                          | C47                              | -9.371124916  | 0.938215944   | -0.864026462 |
|                          | C48                              | -9.128124776  | 0.785693232   | 0.641406550  |
|                          | C49                              | -7.601514129  | 0.062764411   | 2.418504812  |
|                          | C50                              | -6.450848582  | 0.973890541   | 2.848519574  |
|                          | C51                              | -4.850030261  | 2.728548426   | 2.259174054  |
|                          | C52                              | -5.356412528  | 3.967953534   | 3.043437373  |
|                          | C53                              | -4.129930028  | 3.282632984   | 1.020006001  |
|                          | C54                              | -3.376835080  | 2.327259318   | 0.148128135  |
|                          | C55                              | -2.848820807  | 1.068926116   | 0.306452813  |
|                          | C56                              | -2.268719203  | 1.780288554   | -1.717587341 |
|                          | C57                              | -7.191366300  | 5.619360443   | 3.210687191  |
|                          | C58                              | -7.221318539  | 5.613060249   | 4.736721091  |
|                          | C59                              | -8.620215588  | 5.728584330   | 2.629888853  |
|                          | C60                              | -9.234777514  | 7.097448721   | 2.609903240  |
|                          | C61                              | -9.241380746  | 8.106430332   | 3.554143286  |
|                          | C62                              | -10.393698232 | 8.718366769   | 1.762806950  |
|                          | C63                              | 8.857436883   | 1.230321011   | 4.485247155  |
|                          | C64                              | 9.906871921   | 0.157133192   | 4.264983960  |
|                          | C65                              | 7.490735117   | 0.612750764   | 4.093196013  |
|                          | C66                              | 6.332675008   | 1.559575454   | 4.301769912  |
|                          | C67                              | 5.627015054   | 1.600944086   | 5.518687752  |
|                          | C68                              | 5.930097832   | 2.438505870   | 3.280236300  |
|                          | C69                              | 4.551693594   | 2.477780313   | 5.709665045  |
|                          | C70                              | 4.873415363   | 3.330996591   | 3.461729246  |
|                          | C71                              | 4.174830910   | 3.341384272   | 4.672792116  |
|                          | C72                              | 5.409677498   | 6.982996378   | -0.077334750 |
|                          | C73                              | 4.361441072   | 8.092637889   | -0.265284747 |
|                          | C74                              | 4.729002495   | 5.618609860   | 0.036933710  |
|                          | C75                              | 3.495154411   | 9.844772042   | -1.774985929 |



|       |              |              |              |
|-------|--------------|--------------|--------------|
| C76   | 2.049110343  | 9.490035801  | -2.128410845 |
| C77   | 0.455461959  | 7.597150801  | -2.456355224 |
| C78   | -0.149136503 | 7.073547585  | -1.128940386 |
| C79   | 0.597821094  | 6.476713206  | -3.512621266 |
| C80   | -0.618576580 | 5.608941845  | -3.854271234 |
| C81   | -1.687767997 | 6.238749389  | -4.760994742 |
| C82   | -3.271507009 | 8.084559121  | -4.206249887 |
| C83   | 0.178237567  | 5.895668976  | 0.994744433  |
| C84   | -0.095319287 | 6.995283699  | 2.030837500  |
| C85   | 1.129346927  | 4.866647163  | 1.640730300  |
| C86   | 0.874528992  | 8.959837044  | 3.123736480  |
| C87   | 0.254860812  | 10.332139707 | 2.911959671  |
| C88   | -0.984118228 | 11.784495822 | 1.392564243  |
| C89   | -2.323866191 | 12.260908475 | 2.003890676  |
| C90   | -0.989137409 | 11.966121837 | -0.127714435 |
| C91   | -2.074432879 | 11.173088253 | -0.845617016 |
| C92   | -4.396392144 | 11.617653122 | 3.146858152  |
| C93   | -4.432924177 | 12.592547354 | 4.315901464  |
| C94   | -5.087836827 | 10.282648766 | 3.544362008  |
| C95   | -5.213772331 | 9.335282777  | 2.372739389  |
| C96   | -6.316302139 | 9.417624607  | 1.508328837  |
| C97   | -4.215737267 | 8.389510473  | 2.083689425  |
| C98   | -6.407160747 | 8.607564538  | 0.374537906  |
| C99   | -4.276042991 | 7.589593284  | 0.939251754  |
| C100  | -5.374958388 | 7.712315344  | 0.092829534  |
| C101  | 5.003190687  | -2.934226170 | -8.943399438 |
| C102  | 3.536216220  | -2.738370854 | -8.606173946 |
| C103  | 1.934799192  | -1.346363824 | -7.311602848 |
| C104  | 1.479469951  | 0.056405680  | -7.731977725 |
| C105  | 1.854461145  | 2.462482011  | -7.389476855 |
| C106  | 3.033566288  | 3.429645847  | -7.333162966 |
| C107  | 5.265064117  | 3.991700621  | -6.549715906 |
| C108  | 5.928926955  | 4.375738701  | -7.857025836 |
| C109  | -1.789381390 | -2.437456687 | -9.718403110 |
| C110  | -2.852115358 | -1.388387127 | -9.368777769 |
| C111  | -1.428323949 | -3.261647082 | -8.463234370 |
| C112  | -0.660517154 | -4.543690147 | -8.835829542 |
| C113  | -0.110676971 | -5.206963280 | -7.593124438 |
| C114  | -3.338160225 | 0.845278204  | -8.509323775 |
| C115  | -2.808013858 | 2.191699005  | -8.959289090 |
| C116  | -3.879703206 | 0.811198519  | -7.059227675 |
| C117  | -2.737502690 | 0.752805736  | -6.088065432 |
| C118  | -2.065758764 | 1.924459893  | -5.703708208 |
| C119  | -2.205352022 | -0.493565412 | -5.711181649 |
| C120  | -0.840052727 | 1.845049607  | -5.034685929 |
| C121  | -0.985233740 | -0.569488198 | -5.039618957 |
| C122  | -0.279450155 | 0.599701568  | -4.737088719 |
| C123  | 8.388723737  | -5.676273923 | -4.642094279 |
| C124  | 9.475626754  | -5.873551463 | -3.573599954 |
| C125  | 7.014473999  | -6.086520848 | -4.089978672 |
| C126  | 5.826663980  | -5.769550376 | -4.944466899 |
| C127  | 5.575827900  | -6.196905681 | -6.232420753 |
| C128  | 3.767996056  | -5.201904934 | -5.431719858 |
| C129  | 10.538558232 | -7.283030539 | -1.916034397 |
| C130  | 11.944058406 | -6.964496690 | -2.376086847 |
| C131  | 0.693380206  | -6.847918391 | -0.822406876 |
| C132  | 2.155034542  | -6.915268794 | -0.390692271 |
| C133  | 3.174292530  | -6.888915298 | -1.568148245 |
| C134  | 3.146892512  | -8.246208346 | -2.323871915 |
| C135  | 4.290923525  | -8.471089217 | -3.316995300 |
| C136  | 4.366692410  | -9.904863170 | -3.888372561 |
| C137  | 4.587426894  | -6.679445494 | -1.002413348 |
| C138  | 3.811906069  | -0.433801343 | -1.930531497 |
| Fe139 | 4.117701957  | -1.563144109 | -3.518174412 |
| Fe140 | 2.246091589  | 0.767753421  | -1.031123783 |
| Fe141 | 5.130624733  | 0.664048591  | -0.913094684 |
| Fe142 | 4.083568878  | 0.952530110  | -3.260998097 |
| Fe143 | 4.083463402  | 2.979785883  | -1.537938535 |
| Fe144 | 4.967598392  | -1.861762578 | -1.141636901 |
| Fe145 | 2.289798425  | -2.079364582 | -1.488499606 |
| H146  | -6.229220713 | -7.496280937 | -1.109617837 |
| H147  | -6.257774332 | -6.366788710 | -2.288313579 |
| H148  | -9.744139613 | -4.939646090 | -0.168804149 |
| H149  | -8.615274212 | -6.012905829 | -2.009362690 |
| H150  | -8.629761807 | -7.283971265 | -0.792736388 |
| H151  | -8.085649295 | -2.945315554 | 0.940100304  |
| H152  | -8.999998556 | -6.041860738 | 2.401145749  |
| H153  | -9.766617530 | -3.278131062 | 1.412844436  |
| H154  | -8.455988098 | -6.939953188 | 4.475747831  |
| H155  | -6.351048253 | -6.237334678 | 2.352296341  |

|      |               |              |               |
|------|---------------|--------------|---------------|
| H156 | -8.338629686  | -5.296420367 | 5.141896101   |
| H157 | -3.169162952  | -2.172154865 | 2.737362607   |
| H158 | -5.251683986  | -4.025912607 | 2.116466700   |
| H159 | -4.053567502  | -6.538179068 | 2.189523789   |
| H160 | -5.494396477  | -0.949046423 | 6.635001689   |
| H161 | -6.182670130  | -2.924784110 | 4.647715899   |
| H162 | -3.937118078  | -6.855892910 | 3.938061463   |
| H163 | -4.867090043  | -1.784513220 | 2.386414777   |
| H164 | -4.930077558  | -4.514828340 | 6.586525529   |
| H165 | -6.655261555  | -2.290587922 | 6.837521769   |
| H166 | -0.841072100  | -3.684587221 | 3.292144109   |
| H167 | -0.984020286  | -2.503517252 | 1.980048015   |
| H168 | 0.615182724   | -2.875868754 | 2.632126298   |
| H169 | -1.670396489  | -1.504635711 | 4.173627268   |
| H170 | -4.196286887  | -5.815303879 | 8.363015423   |
| H171 | -2.461557219  | 1.420838799  | 5.311603302   |
| H172 | -2.383544184  | -1.277069213 | 8.919252204   |
| H173 | -2.654940701  | 2.094768587  | 9.61602549    |
| H174 | 0.919691173   | -0.307589625 | 3.043268846   |
| H175 | -0.204021610  | 0.544203957  | 4.133460601   |
| H176 | 8.833388939   | 1.452220222  | 5.569569828   |
| H177 | -3.461475613  | 2.707748366  | 6.003668888   |
| H178 | -3.572144739  | 3.093864832  | 8.462759476   |
| H179 | -1.688827693  | 2.871719039  | 6.005795253   |
| H180 | -1.804046583  | 3.273667394  | 8.591303945   |
| H181 | -3.291877912  | 0.771738066  | 7.591693644   |
| H182 | -0.292704938  | 1.397367381  | 7.511237479   |
| H183 | -1.898231586  | -0.675250830 | 6.232578087   |
| H184 | -0.741148295  | 0.046546325  | 2.523851813   |
| H185 | 1.506936295   | 4.195453458  | 0.855802818   |
| H186 | 0.529386327   | 4.274031431  | 2.346607093   |
| H187 | 2.381200879   | 5.031070117  | 3.153639702   |
| H188 | 2.673122451   | 4.098778981  | 5.644246955   |
| H189 | 4.559034048   | 3.992265990  | 2.654401624   |
| H190 | 6.434662483   | 2.407638922  | 2.311539994   |
| H191 | 5.916088612   | 0.931933093  | 6.334031670   |
| H192 | -1.376996897  | -3.293913674 | 5.936133628   |
| H193 | -0.326707516  | -6.296460792 | 5.768202547   |
| H194 | 0.107646865   | -5.878631269 | 7.441274635   |
| H195 | -2.460821654  | -5.251397346 | 6.071303012   |
| H196 | -3.843041809  | -4.347088191 | 9.309550577   |
| H197 | 4.004007217   | 2.479958116  | 6.656078196   |
| H198 | 1.186876467   | -2.146686468 | 4.999917007   |
| H199 | -1.956341386  | -0.690711730 | 11.616758951  |
| H200 | -2.062887779  | -2.333146393 | 10.928432941  |
| H201 | 0.581698806   | -1.928989652 | 10.382736419  |
| H202 | 10.783601120  | -7.467114698 | 4.331769253   |
| H203 | -1.270027128  | -5.502246896 | -4.916467193  |
| H204 | 1.435738922   | -5.799770027 | -2.257672916  |
| H205 | -1.347002350  | -5.249538291 | -9.325173308  |
| H206 | 0.154681408   | -4.311589353 | -9.536787436  |
| H207 | -2.342070253  | -3.540428344 | -7.916428765  |
| H208 | -2.079360214  | 2.142732385  | -9.802382965  |
| H209 | -2.313475321  | -3.110008379 | -10.414601197 |
| H210 | -3.071428077  | -1.896374558 | -2.868284131  |
| H211 | -3.744306834  | -4.785267848 | -2.100235230  |
| H212 | -1.399762162  | -0.063273154 | -8.694173333  |
| H213 | -4.209069304  | 0.675550766  | -9.176062507  |
| H214 | -0.047154405  | -1.310338050 | -9.845047214  |
| H215 | -1.021589622  | -5.552733125 | -3.173783365  |
| H216 | -0.832958625  | -2.635097624 | -7.780815930  |
| H217 | -0.116689961  | -2.573370501 | -10.901960796 |
| H218 | -6.369852656  | -3.112133442 | -3.898361393  |
| H219 | -3.354439102  | -2.310961155 | -1.167759327  |
| H220 | 1.629426213   | -4.394043061 | -8.001098998  |
| H221 | -2.138139736  | -4.166660411 | -1.754649913  |
| H222 | -4.145371095  | 2.219593947  | 2.931788699   |
| H223 | -2.900717952  | 0.378219067  | 1.138583520   |
| H224 | -8.473497361  | 0.343956638  | 3.025559870   |
| H225 | -7.327176595  | -0.202339519 | 0.318815943   |
| H226 | -7.178769598  | 3.772996167  | 2.124082952   |
| H227 | -8.785043343  | 8.195279271  | 4.533680017   |
| H228 | -7.400889512  | 4.605300086  | 5.183095186   |
| H229 | -9.273813621  | 5.006989027  | 3.151635443   |
| H230 | -6.577406326  | 6.470926443  | 2.876397972   |
| H231 | -10.998029871 | 9.341476597  | 1.109442174   |
| H232 | -3.421204297  | 4.045703614  | 1.382578982   |
| H233 | -4.869807395  | 3.806939023  | 0.393922642   |
| H234 | -10.173607222 | 10.027711157 | 3.427204487   |
| H235 | -8.575470141  | 5.399608761  | 1.579815510   |

|      |               |               |               |
|------|---------------|---------------|---------------|
| H236 | -6.309325141  | 1.835338293   | 0.956459923   |
| H237 | -7.339002634  | -0.968915395  | 2.697550612   |
| H238 | -9.799600838  | 1.940569000   | -1.004049223  |
| H239 | -1.820005912  | 1.814527144   | -2.707696997  |
| H240 | -10.131121515 | 0.206508320   | -1.167090264  |
| H241 | 9.965699461   | 2.893558491   | 4.033230266   |
| H242 | 8.384558698   | 3.036260709   | 3.648079299   |
| H243 | 1.624201497   | 6.114124329   | -0.587580608  |
| H244 | -0.786823822  | 5.401290704   | 0.813489331   |
| H245 | 1.596582893   | 7.968182326   | 1.401531717   |
| H246 | -3.310138250  | 3.636568934   | -1.569931632  |
| H247 | -4.851169932  | 4.452460659   | -2.808894852  |
| H248 | -6.294493159  | 3.850760563   | -4.428765928  |
| H249 | -4.641442262  | 5.570104411   | -1.695799313  |
| H250 | -5.141170978  | 1.698505635   | -4.479144898  |
| H251 | -6.931365863  | 1.718583414   | -4.408208783  |
| H252 | 0.009860475   | 11.751904633  | -0.532809807  |
| H253 | -1.200091908  | 13.029755677  | -0.320368601  |
| H254 | -0.695651642  | 10.507096074  | -2.244688074  |
| H255 | -2.368963256  | 9.981330426   | -2.445743196  |
| H256 | -3.192695862  | 9.813165720   | -5.309717671  |
| H257 | -2.124575700  | 5.469940208   | -5.416556871  |
| H258 | -7.279525835  | 8.670280193   | -0.281615335  |
| H259 | -3.366728616  | 8.252042678   | 2.758883162   |
| H260 | -4.415603815  | 8.064555474   | -2.493305212  |
| H261 | 1.391720225   | 5.796975875   | -3.163560671  |
| H262 | 2.563650418   | 7.521816628   | -2.150956046  |
| H263 | -1.088049682  | 5.206701727   | -2.942575739  |
| H264 | -8.154122913  | -0.043492558  | -2.336880071  |
| H265 | 3.917846299   | 10.412968353  | -2.613745344  |
| H266 | -5.724453996  | -0.592092024  | -3.761647992  |
| H267 | 0.979795814   | 6.943054211   | -4.435701494  |
| H268 | -3.460739676  | 6.903887539   | 0.704392764   |
| H269 | 3.443382397   | 10.517228316  | -0.905977048  |
| H270 | -2.408108375  | 8.450690118   | -6.045119392  |
| H271 | -4.762460046  | 9.347550359   | -3.602112735  |
| H272 | -4.752798110  | -3.096905027  | -4.325193149  |
| H273 | -5.597192614  | -3.218542586  | -1.745501718  |
| H274 | -7.122573735  | 10.124142343  | 1.720345124   |
| H275 | -5.062548404  | 1.577433314   | -1.980163915  |
| H276 | -0.216579587  | 8.388883442   | -2.801331477  |
| H277 | -1.215267632  | 6.985340704   | -5.412400566  |
| H278 | -0.220936905  | 4.742782082   | -4.399721985  |
| H279 | -3.264185543  | 6.248665706   | -3.327195581  |
| H280 | 0.390229647   | 8.506538420   | 4.001612622   |
| H281 | -0.564007220  | 9.684035369   | 1.154479094   |
| H282 | -0.250234571  | 12.495401821  | 1.803175679   |
| H283 | 1.933852426   | 9.119191587   | 3.368553855   |
| H284 | -2.716983953  | 10.385160239  | 2.665666854   |
| H285 | 5.517912663   | -1.962007778  | -8.957624365  |
| H286 | 5.427999721   | -3.511247003  | -8.095495910  |
| H287 | 8.385761386   | -4.595268725  | -4.847856036  |
| H288 | 6.106478847   | -3.913638532  | -10.350387407 |
| H289 | 4.552450087   | -4.422466884  | -10.256270270 |
| H290 | 5.513762089   | 4.863662418   | 0.173152601   |
| H291 | 5.580408908   | 7.358717016   | 1.921666978   |
| H292 | 5.064389884   | 8.449335146   | -2.164417421  |
| H293 | 4.056414456   | 5.605985181   | 0.906041392   |
| H294 | 6.757762098   | 8.065171617   | 1.031787817   |
| H295 | 6.030188150   | 3.520712132   | -5.912889834  |
| H296 | 6.090340836   | 6.970792802   | -0.942686542  |
| H297 | 4.898636867   | -7.562503893  | 4.654328193   |
| H298 | 6.875087991   | -8.168009583  | 2.386956993   |
| H299 | 4.276837501   | 2.119163834   | -6.284283115  |
| H300 | 4.767723871   | -0.463801130  | 3.672970623   |
| H301 | 1.416119525   | 2.529341666   | -8.392621556  |
| H302 | -0.571554785  | -1.537047443  | -4.747097631  |
| H303 | 1.098772425   | 2.854516554   | -6.687461377  |
| H304 | 3.947799802   | -4.990063133  | 4.424716459   |
| H305 | 2.726090218   | 0.800673299   | -6.306846829  |
| H306 | 3.706409321   | -5.366965621  | 2.710614329   |
| H307 | 4.530738583   | -7.658282770  | 2.916249474   |
| H308 | 6.215615398   | -5.771508282  | 2.528215785   |
| H309 | 6.338161177   | -5.569242904  | 4.282967214   |
| H310 | -4.527092716  | -0.072964200  | -6.965995024  |
| H311 | 5.530551814   | -9.995544031  | 4.337353400   |
| H312 | 4.743488099   | -12.053095379 | 2.235588055   |
| H313 | 0.680651140   | 0.536847579   | -4.226514763  |
| H314 | 5.828733783   | -12.434219221 | 4.922275083   |
| H315 | 4.311603650   | -12.696754798 | 4.363977950   |

|       |              |               |              |
|-------|--------------|---------------|--------------|
| H316  | 5.392784532  | -3.576925978  | 2.210967975  |
| H317  | -0.301219589 | 2.751878378   | -4.755509664 |
| H318  | -2.741092992 | -1.410268172  | -5.967916197 |
| H319  | 7.873253590  | -9.688694020  | -2.013017924 |
| H320  | 7.013765051  | -7.175847466  | -3.911740405 |
| H321  | 6.697543985  | -8.111599942  | -0.371500000 |
| H322  | 7.119333090  | -10.150739522 | -3.290747118 |
| H323  | 5.772139499  | 3.656769744   | -8.696473347 |
| H324  | 6.408493882  | -4.978207634  | -0.155320575 |
| H325  | 2.305814123  | -7.799481220  | 0.239427034  |
| H326  | 4.034226521  | -1.115279599  | -7.470240764 |
| H327  | 3.176763348  | -9.036992340  | -1.558122397 |
| H328  | 3.762145061  | -6.047380768  | -7.363204950 |
| H329  | 2.748122038  | -4.844474409  | -5.379413651 |
| H330  | 6.303424573  | -12.777357738 | 2.647316338  |
| H331  | 5.524878259  | -1.288651544  | 2.331125211  |
| H332  | 8.304647128  | -5.861918195  | 0.963786573  |
| H333  | 7.283918293  | -3.738075085  | 0.170507624  |
| H334  | 8.741530080  | -7.147641599  | 2.882508363  |
| H335  | 3.210632373  | -3.280551070  | 5.115971128  |
| H336  | 4.175640776  | -7.783634976  | -4.168740858 |
| H337  | 5.257350350  | -8.241859689  | -2.847563932 |
| H338  | 2.178354227  | -8.335651621  | -2.840201625 |
| H339  | 1.954353138  | -1.430683753  | -6.213239169 |
| H340  | -2.485949332 | 2.893850892   | -5.982104843 |
| H341  | -4.499010959 | 1.710052269   | -6.919835944 |
| H342  | 2.322724398  | -6.024825832  | 0.238777210  |
| H343  | 8.492984120  | -7.360773011  | 0.592903420  |
| H344  | 7.405088868  | -9.281423029  | 0.345435698  |
| H345  | 3.582214774  | -1.609404207  | 5.267194283  |
| H346  | 6.196255901  | -6.745269981  | -6.930679623 |
| H347  | 6.872285306  | -5.623156971  | -3.106112648 |
| H348  | 1.226031688  | -2.070297001  | -7.717852009 |
| H349  | 4.923645338  | 4.907111937   | -6.042283374 |
| H350  | 7.348517859  | -0.295832947  | 4.696666114  |
| H351  | 7.538936562  | 0.310130258   | 3.034778375  |
| H352  | 9.612073841  | -6.035390691  | -6.247351284 |
| H353  | 8.814986683  | -7.369994312  | -5.739908108 |
| H354  | 10.521830763 | -8.346880950  | -1.630909494 |
| H355  | 8.906876717  | -7.855745780  | -3.162386221 |
| H356  | 12.115413463 | -7.069487554  | -3.474558857 |
| H357  | 10.303420976 | -6.694924825  | -1.014798590 |
| H358  | 10.264516986 | 0.074526405   | 3.209973247  |
| H359  | -3.472348065 | 12.705082709  | 4.872053819  |
| H360  | 9.676722321  | -7.436173416  | 5.726656466  |
| H361  | 9.096318803  | -4.927395473  | 4.747849961  |
| H362  | -4.959063990 | 12.080343859  | 2.318919515  |
| H363  | -4.513536408 | 9.811262025   | 4.357217456  |
| H364  | -6.080376798 | 10.532892592  | 3.944782770  |
| H365  | 1.215352158  | -3.092162902  | -1.209333101 |
| H366  | 3.217009228  | -0.663546992  | 0.908010813  |
| H367  | -6.321020801 | 6.949305056   | -1.428584498 |
| H368  | 0.608444311  | -1.279282733  | 0.271464146  |
| H369  | -1.515349325 | -0.035004207  | -1.027241635 |
| Mo370 | 4.076141976  | -4.069595685  | -2.437038356 |
| N371  | -6.824769051 | -7.086141420  | -1.833388920 |
| N372  | -8.867666655 | -4.812829212  | 0.330932245  |
| N373  | -8.508080985 | -5.428716111  | 3.046789910  |
| N374  | -5.838550796 | -6.279655342  | 3.234158871  |
| N375  | -4.520167353 | -3.789629039  | 2.784760316  |
| N376  | -5.440054377 | -2.435115262  | 5.153408981  |
| N377  | -4.425292622 | -4.024603799  | 7.330006525  |
| N378  | -1.797055085 | -5.268638124  | 6.852123623  |
| N379  | -0.370627603 | -3.194062697  | 5.818093779  |
| N380  | -1.043818385 | -0.367147816  | 6.703387323  |
| N381  | -1.649619576 | -0.879061574  | 9.511068672  |
| N382  | 5.104008135  | -12.054957657 | 4.308581017  |
| N383  | 6.076822936  | -9.691506590  | 3.524558163  |
| N384  | 4.839616328  | -3.643805109  | 3.069425586  |
| N385  | 3.826909422  | -2.504661306  | 4.851701324  |
| N386  | 4.981693161  | -1.339655851  | 3.205533544  |
| N387  | 8.711802191  | -7.384245105  | 3.898719068  |
| N388  | -5.494753213 | -2.592554047  | -3.806100937 |
| N389  | -1.567847672 | -5.224461279  | -3.975660357 |
| N390  | -5.817048313 | -0.188769816  | -2.813831983 |
| N391  | -8.206133690 | 0.760028390   | -1.714243809 |
| N392  | -7.990170906 | 0.139861737   | 1.022903281  |
| N393  | -5.912951065 | 1.800070099   | 1.899610607  |
| N394  | -2.998237712 | 2.737914942   | -1.125641938 |
| N395  | -2.180093272 | 0.754425844   | -0.863169639 |

|      |              |               |               |
|------|--------------|---------------|---------------|
| N396 | -6.617215364 | 4.364878217   | 2.731000462   |
| N397 | -9.959322458 | 7.492465305   | 1.495636270   |
| N398 | -9.980350870 | 9.127675226   | 2.995608066   |
| N399 | 9.172563557  | 2.382774939   | 3.637374600   |
| N400 | 6.216283899  | 7.202140431   | 1.132804349   |
| N401 | 4.370702098  | 8.725841862   | -1.474648001  |
| N402 | 1.781364564  | 8.174116866   | -2.264647782  |
| N403 | -2.781009904 | 6.862268082   | -4.008433151  |
| N404 | -2.888465625 | 8.847203539   | -5.245781961  |
| N405 | -4.118285219 | 8.622555232   | -3.297510456  |
| N406 | 0.686730145  | 6.412700885   | -0.277329362  |
| N407 | 0.768136970  | 8.049690798   | 1.997874785   |
| N408 | -0.543968301 | 10.464713494  | 1.809975243   |
| N409 | -1.694056537 | 10.621006918  | -2.029952069  |
| N410 | -3.027228899 | 11.351965070  | 2.724891172   |
| N411 | 5.143512503  | -3.586020785  | -10.247738683 |
| N412 | 3.254115211  | -1.659047427  | -7.846595563  |
| N413 | 2.129727893  | 1.065080397   | -7.109183855  |
| N414 | 4.182209575  | 3.038146387   | -6.724958751  |
| N415 | -0.674722284 | -1.838502703  | -10.462641313 |
| N416 | -2.401981136 | -0.210761029  | -8.846415386  |
| N417 | 8.704273446  | -6.365084045  | -5.907067490  |
| N418 | 4.681366529  | -5.135828710  | -4.463146092  |
| N419 | 4.279446755  | -5.827054944  | -6.516547292  |
| N420 | 9.560153274  | -7.090924187  | -2.971219816  |
| N421 | 0.079176712  | 2.301171754   | 0.249296603   |
| N422 | 2.312958952  | -0.570464064  | 0.413594558   |
| N423 | 0.916502484  | 1.728374269   | -0.245561252  |
| N424 | 1.477080013  | -1.423617221  | 0.841348822   |
| O425 | -6.634596596 | -5.252305070  | 0.384849984   |
| O426 | -7.686294861 | -3.329632246  | 3.404531711   |
| O427 | -5.916213292 | -5.941081205  | 5.492637955   |
| O428 | -2.941978907 | -4.561720179  | 4.235523221   |
| O429 | -3.544933441 | -1.194510544  | 5.025818768   |
| O430 | -4.155452701 | -2.048534440  | 8.455258920   |
| O431 | -1.454331792 | -5.036013387  | 9.104793647   |
| O432 | 1.605918498  | -4.376847301  | 5.821448135   |
| O433 | 1.244074418  | -0.434390079  | 6.745127845   |
| O434 | -0.114847219 | 0.750722891   | 9.891070478   |
| O435 | 0.324314507  | -1.685483131  | 12.394090933  |
| O436 | 6.927777805  | -10.525392603 | 1.543628154   |
| O437 | 7.520075111  | -8.348228850  | 5.613502789   |
| O438 | 11.099573587 | -5.001115699  | 5.127757716   |
| O439 | -5.601625223 | -0.841593155  | -0.624513083  |
| O440 | -3.199968430 | -3.898773670  | -4.842183136  |
| O441 | -7.068870571 | 2.531107514   | -0.831291995  |
| O442 | -5.998801810 | 3.409356833   | -3.612660148  |
| O443 | -9.966769247 | 1.235349481   | 1.432962468   |
| O444 | -6.045857821 | 0.946768797   | 4.015279083   |
| O445 | -4.618803737 | 4.587358431   | 3.815109793   |
| O446 | -7.107227469 | 6.609064025   | 5.430778296   |
| O447 | 10.327498586 | -0.584394703  | 5.140888385   |
| O448 | 3.111024044  | 4.216148374   | 4.781067274   |
| O449 | 3.559420553  | 8.404213284   | 0.632299517   |
| O450 | 1.216812074  | 10.405127880  | -2.276751280  |
| O451 | -1.349456371 | 7.262017472   | -0.877281420  |
| O452 | -1.005074756 | 6.870251931   | 2.859989978   |
| O453 | 2.220221543  | 5.502161808   | 2.310908559   |
| O454 | 0.460529811  | 11.252510088  | 3.712329590   |
| O455 | -2.681669674 | 13.440457992  | 1.874241144   |
| O456 | -3.230142942 | 11.092462401  | -0.405974225  |
| O457 | -5.443136890 | 13.193577747  | 4.645039835   |
| O458 | -5.406438127 | 6.938850291   | -1.085378567  |
| O459 | 2.674016100  | -3.564766563  | -8.989827486  |
| O460 | 0.596061912  | 0.232607489   | -8.595537421  |
| O461 | 2.896208227  | 4.572389947   | -7.800585369  |
| O462 | 6.619444744  | 5.373573153   | -7.987801295  |
| O463 | -4.062285561 | -1.613714286  | -9.536857654  |
| O464 | -0.788424235 | -5.897430912  | -6.839737990  |
| O465 | 1.183267110  | -4.962527802  | -7.300398882  |
| O466 | -3.170463304 | 3.265653770   | -8.500013532  |
| O467 | 10.281806167 | -4.966212481  | -3.288057216  |
| O468 | 12.859292623 | -6.680021627  | -1.615825839  |
| O469 | 0.460051420  | -6.092444129  | -1.904495235  |
| O470 | -0.215630595 | -7.391727714  | -0.199559562  |
| O471 | 5.533193553  | -10.424692150 | -3.999710250  |
| O472 | 3.283165318  | -10.454298728 | -4.234070293  |
| O473 | 5.240792112  | -5.635072740  | -1.445738731  |
| O474 | 5.069115642  | -7.487341091  | -0.187003585  |
| O475 | 2.829971133  | -5.793352007  | -2.415434527  |

|      |              |               |              |
|------|--------------|---------------|--------------|
| O476 | 8.877238459  | -6.641436610  | 1.167172853  |
| O477 | 6.965720277  | -4.574584564  | 0.559502772  |
| O478 | -4.160275628 | 4.988693163   | -2.334724966 |
| O479 | 8.039914689  | -10.083925376 | -2.897717776 |
| O480 | 7.577018265  | -8.572629041  | -0.325690711 |
| S481 | 3.729366062  | 5.204586802   | -1.468911124 |
| S482 | 2.344839412  | 2.305791118   | -2.810033086 |
| S483 | 2.319900444  | -2.931581914  | -3.538464864 |
| S484 | 3.822405680  | 1.924653546   | 0.372797703  |
| S485 | 0.631944644  | -0.655170236  | -1.929390696 |
| S486 | 4.476223323  | -0.112678252  | -5.153095654 |
| S487 | 3.596771167  | -3.402959957  | -0.231276140 |
| S488 | 5.892332619  | 2.054859031   | -2.509412057 |
| S489 | 5.950406270  | -2.710101801  | -2.942524363 |
| S490 | 6.359755183  | -0.792463911  | 0.188190450  |
| end  |              |               |              |
| end  |              |               |              |

## N2-ready-a to Fe6-NH-NH-a

Figure 8, scheme D

| reactant N2-ready-a S=3/2) | bm52rda6nhntg_5_53281.86 |              |               |              |
|----------------------------|--------------------------|--------------|---------------|--------------|
| Fe( 139) -2.232            | C1                       | -7.743908671 | -5.366496598  | 1.289343050  |
| Fe( 140) -0.890            | C2                       | -8.109923312 | -6.516787929  | 0.343849330  |
| Fe( 141) -2.522            | C3                       | -8.593674907 | -3.454551021  | 2.576368922  |
| Fe( 142) 2.828             | C4                       | -7.957456065 | -3.717331140  | 3.938438242  |
| Fe( 143) 2.695             | C5                       | -7.530248928 | -5.315721974  | 5.740738566  |
| Fe( 144) 1.293             | C6                       | -6.004547693 | -5.430806126  | 5.674659184  |
| Fe( 145) 1.819             | C7                       | -4.028317301 | -5.741492819  | 4.279060702  |
|                            | C8                       | -3.492889419 | -4.307675899  | 4.311615426  |
|                            | C9                       | -3.905456278 | -1.977557040  | 3.656115659  |
|                            | C10                      | -3.916349136 | -1.358497929  | 5.062465437  |
|                            | C11                      | -4.943287942 | -1.202271107  | 7.239799684  |
|                            | C12                      | -3.869685128 | -1.761197075  | 8.185545895  |
|                            | C13                      | -2.865917363 | -3.782522129  | 9.147316754  |
|                            | C14                      | -1.394693876 | -4.076258942  | 8.821406718  |
|                            | C15                      | 0.251767760  | -4.755272327  | 7.118271143  |
|                            | C16                      | 0.988591476  | -3.620938880  | 6.397711959  |
|                            | C17                      | 0.665720413  | -1.360218838  | 5.402949405  |
|                            | C18                      | 0.786445251  | -0.150579123  | 6.344483889  |
|                            | C19                      | -0.238358593 | -1.137345884  | 4.166224141  |
|                            | C20                      | -0.018700417 | 0.232157852   | 3.509679176  |
|                            | C21                      | -0.084850183 | -2.304479965  | 3.179729517  |
|                            | C22                      | -0.370920419 | 1.583805796   | 7.640863837  |
|                            | C23                      | -0.011848791 | 1.248261131   | 9.098755639  |
|                            | C24                      | -1.704601329 | 2.355836835   | 7.502706545  |
|                            | C25                      | -1.779303786 | 3.520572359   | 8.495580290  |
|                            | C26                      | -1.884258816 | 2.867580781   | 6.066844714  |
|                            | C27                      | -0.418423396 | -0.104717007  | 11.064889193 |
|                            | C28                      | 1.045208006  | -0.378697442  | 11.347148859 |
|                            | C29                      | 5.893725472  | -11.618333859 | 3.731195325  |
|                            | C30                      | 6.516580380  | -10.336746149 | 3.186208508  |
|                            | C31                      | 6.800639962  | -7.916093661  | 3.688900808  |
|                            | C32                      | 8.026486841  | -7.527513982  | 4.535276804  |
|                            | C33                      | 5.627891142  | -6.952056653  | 3.933645463  |
|                            | C34                      | 5.968141055  | -5.511197886  | 3.561017117  |
|                            | C35                      | 4.728178949  | -4.621705146  | 3.512338992  |
|                            | C36                      | 4.887348827  | -2.114567088  | 3.479719683  |
|                            | C37                      | 10.275630659 | -6.553850620  | 4.476783474  |
|                            | C38                      | 10.476079520 | -5.055358377  | 4.467714460  |
|                            | C39                      | -5.343615888 | -2.677180648  | -1.574140897 |
|                            | C40                      | -5.703446917 | -1.241847857  | -1.143005628 |
|                            | C41                      | -3.804978356 | -2.820453688  | -1.509937840 |
|                            | C42                      | -3.247777229 | -4.254219064  | -1.625222865 |
|                            | C43                      | -2.977693312 | -4.742737749  | -3.049025285 |
|                            | C44                      | -6.180400266 | 0.999079385   | -2.049930061 |
|                            | C45                      | -7.265922049 | 1.460787904   | -1.067065924 |
|                            | C46                      | -6.354195036 | 1.609946081   | -3.446141789 |
|                            | C47                      | -9.420734638 | 0.949961647   | -0.016769795 |
|                            | C48                      | -9.021288868 | 0.963578962   | 1.461870940  |
|                            | C49                      | -7.316727036 | 0.436439063   | 3.140719846  |
|                            | C50                      | -6.142159970 | 1.392386903   | 3.355913727  |
|                            | C51                      | -4.602355226 | 3.053305000   | 2.434635212  |
|                            | C52                      | -5.040708733 | 4.361821479   | 3.132651614  |
|                            | C53                      | -4.011665658 | 3.489161697   | 1.085113314  |
|                            | C54                      | -3.408665285 | 2.422105200   | 0.235409509  |
|                            | C55                      | -3.003288748 | 1.132664201   | 0.468974095  |

|      |               |              |              |
|------|---------------|--------------|--------------|
| C56  | -2.580382246  | 1.596017138  | -1.670159488 |
| C57  | -6.841079849  | 6.040455957  | 3.249317120  |
| C58  | -6.738615035  | 6.201928604  | 4.764951921  |
| C59  | -8.319038682  | 6.096825398  | 2.795108223  |
| C60  | -8.937865932  | 7.458995418  | 2.674540787  |
| C61  | -8.871540400  | 8.561585539  | 3.504082073  |
| C62  | -10.180151194 | 8.982079990  | 1.766100149  |
| C63  | 9.237130889   | 1.641874393  | 3.408112128  |
| C64  | 10.280704238  | 0.552445744  | 3.241746258  |
| C65  | 7.848964966   | 0.985722302  | 3.221210269  |
| C66  | 6.711559379   | 1.956090454  | 3.435093326  |
| C67  | 6.137873443   | 2.146106801  | 4.704509704  |
| C68  | 6.199370896   | 2.708572299  | 2.362595675  |
| C69  | 5.088011088   | 3.051363020  | 4.901049679  |
| C70  | 5.167189598   | 3.628859344  | 2.545818670  |
| C71  | 4.605729027   | 3.792782153  | 3.814711873  |
| C72  | 5.369117848   | 6.849377470  | -1.402408145 |
| C73  | 4.315197754   | 7.951842996  | -1.606789360 |
| C74  | 4.697893727   | 5.513721483  | -1.093107071 |
| C75  | 3.310604052   | 9.544264681  | -3.206408251 |
| C76  | 1.836598775   | 9.164467158  | -3.373541169 |
| C77  | 0.219989217   | 7.265820873  | -3.332681267 |
| C78  | -0.245014442  | 6.923136225  | -1.893855333 |
| C79  | 0.249301429   | 6.023757613  | -4.250041583 |
| C80  | -1.004443430  | 5.147302246  | -4.352941852 |
| C81  | -2.150848408  | 5.682934765  | -5.227244397 |
| C82  | -3.673728408  | 7.601375905  | -4.747274719 |
| C83  | 0.273507127   | 5.964049025  | 0.295860746  |
| C84  | 0.117052043   | 7.180060482  | 1.220823741  |
| C85  | 1.271663943   | 4.993485829  | 0.960139627  |
| C86  | 1.193776684   | 9.245088475  | 1.970870746  |
| C87  | 0.553390434   | 10.591120558 | 1.667000622  |
| C88  | -0.847762176  | 11.868007860 | 0.137377507  |
| C89  | -2.122738409  | 12.423874011 | 0.816755166  |
| C90  | -0.999994415  | 11.883976064 | -1.385755914 |
| C91  | -2.150562996  | 11.029289346 | -1.901947182 |
| C92  | -4.067414206  | 11.944550987 | 2.225789963  |
| C93  | -3.985442664  | 13.051603051 | 3.269370815  |
| C94  | -4.729905585  | 10.681856305 | 2.841764631  |
| C95  | -4.971355640  | 9.608583542  | 1.805758224  |
| C96  | -6.147322477  | 9.613269112  | 1.040488541  |
| C97  | -4.009551452  | 8.621917511  | 1.536117243  |
| C98  | -6.350585889  | 8.678726720  | 0.023884119  |
| C99  | -4.183916145  | 7.693616817  | 0.505013871  |
| C100 | -5.354976712  | 7.739239830  | -0.245453080 |
| C101 | 4.085418064   | -3.989996376 | -9.003291193 |
| C102 | 2.660005919   | -3.735784831 | -8.544751256 |
| C103 | 1.209531806   | -2.196299297 | -7.239720122 |
| C104 | 0.709939193   | -0.842040210 | -7.756394194 |
| C105 | 1.126345158   | 1.581547171  | -7.714118707 |
| C106 | 2.307501576   | 2.527126938  | -7.920495129 |
| C107 | 4.591279911   | 3.184845302  | -7.417622059 |
| C108 | 5.142531754   | 3.384472053  | -8.815629148 |
| C109 | -2.760583692  | -3.497785280 | -9.168599855 |
| C110 | -3.785000873  | -2.404061350 | -8.842072836 |
| C111 | -2.269332437  | -4.164965944 | -7.862388722 |
| C112 | -1.538749290  | -5.488783837 | -8.152699547 |
| C113 | -0.867282199  | -6.013641931 | -6.903510181 |
| C114 | -4.187603838  | -0.086357822 | -8.181052726 |
| C115 | -3.705394956  | 1.199036798  | -8.824461000 |
| C116 | -4.565133190  | 0.046301551  | -6.683629315 |
| C117 | -3.331492419  | 0.065546169  | -5.825607375 |
| C118 | -2.612546113  | 1.256720812  | -5.624579002 |
| C119 | -2.793733039  | -1.141825887 | -5.349737955 |
| C120 | -1.342920743  | 1.220121304  | -5.038241553 |
| C121 | -1.525682771  | -1.177573852 | -4.762967400 |
| C122 | -0.783900734  | 0.001882817  | -4.642075990 |
| C123 | 7.926898326   | -6.261788902 | -4.800287485 |
| C124 | 9.105173908   | -6.336487589 | -3.816457761 |
| C125 | 6.613363518   | -6.607172534 | -4.084871994 |
| C126 | 5.355430742   | -6.393975093 | -4.862002833 |
| C127 | 4.984828272   | -6.981027533 | -6.055114294 |
| C128 | 3.264401064   | -5.862506571 | -5.226512710 |
| C129 | 10.312894384  | -7.545981976 | -2.101544913 |
| C130 | 11.668824140  | -7.329853124 | -2.737270290 |
| C131 | 0.625206938   | -6.905053068 | -0.187645552 |
| C132 | 2.116857352   | -6.957094063 | 0.123596954  |
| C133 | 3.029298433   | -7.090164862 | -1.133439378 |
| C134 | 2.929512712   | -8.531618059 | -1.702824841 |
| C135 | 3.963066694   | -8.878988619 | -2.777503769 |

|       |              |               |              |
|-------|--------------|---------------|--------------|
| C136  | 3.988286466  | -10.370569371 | -3.176012913 |
| C137  | 4.488768656  | -6.832057860  | -0.724721653 |
| C138  | 3.577491902  | -0.706639139  | -2.234748060 |
| Fe139 | 3.841229937  | -2.001006781  | -3.721797815 |
| Fe140 | 2.127276357  | 0.758702861   | -1.610078230 |
| Fe141 | 5.027792568  | 0.471366863   | -1.538425562 |
| Fe142 | 3.786379260  | 0.530242724   | -3.805330322 |
| Fe143 | 3.845440460  | 2.710430837   | -2.291627064 |
| Fe144 | 4.733201145  | -2.036868784  | -1.360136799 |
| Fe145 | 2.208395874  | -2.409551606  | -1.640946700 |
| H146  | -6.327503418 | -7.511880113  | 0.363531485  |
| H147  | -6.502377990 | -6.518349502  | -0.919560245 |
| H148  | -9.725134505 | -4.811775755  | 1.376566284  |
| H149  | -8.823238585 | -6.141516904  | -0.407819428 |
| H150  | -8.664931067 | -7.257115592  | 0.945798133  |
| H151  | -7.943339796 | -2.730727452  | 2.063243433  |
| H152  | -8.708862860 | -5.622030627  | 3.966824635  |
| H153  | -9.567865827 | -2.974260603  | 2.738948350  |
| H154  | -7.946606194 | -6.278542809  | 6.064227357  |
| H155  | -6.065237720 | -5.864369554  | 3.656147026  |
| H156  | -7.753615518 | -4.570280038  | 6.515021146  |
| H157  | -2.905308887 | -1.802108752  | 3.239223216  |
| H158  | -5.043897914 | -3.704357446  | 3.099536044  |
| H159  | -3.796855889 | -6.201141527  | 3.308759390  |
| H160  | -4.797264703 | -0.114879996  | 7.199254773  |
| H161  | -5.685237369 | -2.311473416  | 5.541225709  |
| H162  | -3.511561619 | -6.305513118  | 5.064437337  |
| H163  | -4.635273088 | -1.456137278  | 3.020841349  |
| H164  | -4.245499058 | -3.673693478  | 7.513985428  |
| H165  | -5.931453993 | -1.409271364  | 7.674170635  |
| H166  | -0.421834816 | -3.249698500  | 3.627031639  |
| H167  | -0.690419821 | -2.130406883  | 2.275611874  |
| H168  | 0.956903165  | -2.434488510  | 2.856247320  |
| H169  | -1.273943241 | -1.143298503  | 4.535200729  |
| H170  | -3.350255620 | -4.742096151  | 9.381532845  |
| H171  | -1.891626052 | 2.051608656   | 5.332170035  |
| H172  | -1.454136102 | -0.253666531  | 9.205453200  |
| H173  | -1.742500684 | 3.184262676   | 9.541519377  |
| H174  | 0.927833611  | 0.287042341   | 2.964127219  |
| H175  | -0.023093198 | 1.050985138   | 4.241478970  |
| H176  | 9.304457310  | 2.000079762   | 4.453557638  |
| H177  | -2.838625948 | 3.404742931   | 5.969387258  |
| H178  | -2.720459923 | 4.070323807   | 8.348458017  |
| H179  | -1.072707088 | 3.566539573   | 5.804985423  |
| H180  | -0.945994539 | 4.223149812   | 8.335541459  |
| H181  | -2.525434929 | 1.651315562   | 7.729748674  |
| H182  | 0.453289884  | 2.228320049   | 7.299705005  |
| H183  | -1.272509874 | 0.061884773   | 6.421371147  |
| H184  | -0.830660439 | 0.432601343   | 2.793061600  |
| H185  | 1.568487204  | 4.230363881   | 0.225487452  |
| H186  | 0.737855727  | 4.495832265   | 1.782939040  |
| H187  | 2.670241714  | 5.305043687   | 2.315177683  |
| H188  | 3.221208739  | 4.679223120   | 4.848422131  |
| H189  | 4.773223614  | 4.196233725   | 1.702382793  |
| H190  | 6.599661760  | 2.554467405   | 1.357757037  |
| H191  | 6.507576180  | 1.570065029   | 5.557649898  |
| H192  | -0.755854435 | -2.597621750  | 6.392558558  |
| H193  | 0.239585263  | -5.621745807  | 6.441174854  |
| H194  | 0.840910250  | -5.026705879  | 8.003651293  |
| H195  | -1.843109407 | -4.486018238  | 6.827312077  |
| H196  | -2.858311141 | -3.168969858  | 10.056241209 |
| H197  | 4.641112039  | 3.173452212   | 5.891803035  |
| H198  | 1.691020616  | -1.564305037  | 5.075417136  |
| H199  | -0.762752592 | 0.692043499   | 11.743878937 |
| H200  | -0.974275836 | -1.022130261  | 11.312492958 |
| H201  | 1.640289437  | -0.733324457  | 10.473850741 |
| H202  | 11.154017315 | -7.038193071  | 4.022973780  |
| H203  | -1.744543502 | -5.973314682  | -4.124814781 |
| H204  | 1.263320256  | -6.050789986  | -1.797567246 |
| H205  | -2.270646903 | -6.238897459  | -8.485927420 |
| H206  | -0.799387932 | -5.346793635  | -8.953897002 |
| H207  | -3.119408692 | -4.365023780  | -7.191609552 |
| H208  | -3.068761974 | 1.049816770   | -9.727887593 |
| H209  | -3.348607750 | -4.245828980  | -9.721864182 |
| H210  | -3.362308377 | -2.189775293  | -2.299784073 |
| H211  | -3.947823226 | -4.971794714  | -1.164001089 |
| H212  | -2.275743044 | -1.031795055  | -8.439618348 |
| H213  | -5.125479854 | -0.321876909  | -8.725087967 |
| H214  | -1.037978490 | -2.413718497  | -9.584307352 |
| H215  | -1.310326692 | -5.833016181  | -2.424354022 |



|      |               |              |               |
|------|---------------|--------------|---------------|
| H216 | -1.610185230  | -3.461327823 | -7.329873214  |
| H217 | -1.207748269  | -3.783101868 | -10.482342010 |
| H218 | -6.750052967  | -3.458432965 | -2.870325137  |
| H219 | -3.484089358  | -2.413790071 | -0.539126314  |
| H220 | 0.828340143   | -5.291218016 | -7.580283886  |
| H221 | -2.320306803  | -4.326337684 | -1.039150613  |
| H222 | -3.832488486  | 2.608336103  | 3.080705511   |
| H223 | -3.044584243  | 0.522200845  | 1.361865005   |
| H224 | -8.129106068  | 0.776425493  | 3.797700527   |
| H225 | -7.260506337  | -0.068595476 | 1.066823250   |
| H226 | -6.928938422  | 4.085422035  | 2.379483604   |
| H227 | -8.335159502  | 8.749116388  | 4.426876360   |
| H228 | -6.888824551  | 5.248305812  | 5.328110115   |
| H229 | -8.922694509  | 5.448341376  | 3.454892521   |
| H230 | -6.260422124  | 6.842380319  | 2.767109214   |
| H231 | -10.847956986 | 9.532442049  | 1.109127128   |
| H232 | -3.241551139  | 4.247037745  | 1.300701732   |
| H233 | -4.798832428  | 3.990425640  | 0.499305366   |
| H234 | -9.830451020  | 10.457700818 | 3.261536514   |
| H235 | -8.369497903  | 5.646880648  | 1.790856632   |
| H236 | -6.175181265  | 2.033214160  | 1.372131924   |
| H237 | -7.012688849  | -0.557087360 | 3.502325487   |
| H238 | -9.858077333  | 1.937064230  | -0.222750523  |
| H239 | -2.244175263  | 1.492450406  | -2.699617993  |
| H240 | -10.210605108 | 0.200221061  | -0.154532329  |
| H241 | 10.288158999  | 3.235679470  | 2.669006899   |
| H242 | 8.681233296   | 3.327374442  | 2.389296487   |
| H243 | 1.551492948   | 5.955240621  | -1.444509780  |
| H244 | -0.711425390  | 5.475510902  | 0.266109394   |
| H245 | 1.733127077   | 8.056414926  | 0.307834606   |
| H246 | -3.443744095  | 3.544447407  | -1.610286855  |
| H247 | -5.112766552  | 4.165047579  | -2.787675352  |
| H248 | -6.700596124  | 3.396952631  | -4.178237428  |
| H249 | -4.796308465  | 5.413753536  | -1.850093749  |
| H250 | -5.527753363  | 1.253047110  | -4.082712397  |
| H251 | -7.308771702  | 1.280952848  | -3.884650411  |
| H252 | -0.046543906  | 11.606267527 | -1.856318883  |
| H253 | -1.221931248  | 12.923196157 | -1.675173388  |
| H254 | -0.907797925  | 10.194499386 | -3.334757269  |
| H255 | -2.589121520  | 9.663282504  | -3.318928694  |
| H256 | -3.716976427  | 9.182181613  | -6.052879054  |
| H257 | -2.647808514  | 4.849645697  | -5.747024446  |
| H258 | -7.276758206  | 8.686870532  | -0.556639957  |
| H259 | -3.099192518  | 8.555298239  | 2.137227853   |
| H260 | -4.681456216  | 7.780217161  | -2.958720923  |
| H261 | 1.071539623   | 5.378934623  | -3.900519584  |
| H262 | 2.348348455   | 7.197597187  | -3.231116589  |
| H263 | -1.386767640  | 4.885266271  | -3.354005014  |
| H264 | -8.368076739  | -0.205970913 | -1.489181479  |
| H265 | 3.646395632   | 10.010730877 | -4.142264557  |
| H266 | -6.098104082  | -0.954167999 | -3.076528571  |
| H267 | 0.536465626   | 6.365293324  | -5.257972344  |
| H268 | -3.395114197  | 6.977059077  | 0.272595089   |
| H269 | 3.340737548   | 10.310122005 | -2.417824978  |
| H270 | -2.988374035  | 7.745554778  | -6.685403672  |
| H271 | -5.106435420  | 8.943439882  | -4.169744242  |
| H272 | -5.180748072  | -3.523846689 | -3.444015820  |
| H273 | -5.774934536  | -3.336835731 | -0.798532152  |
| H274 | -6.923745967  | 10.355258989 | 1.241223482   |
| H275 | -5.249638310  | 1.386820016  | -1.612310163  |
| H276 | -0.481451942  | 8.020692614  | -3.701637276  |
| H277 | -1.737800987  | 6.342725504  | -6.000594436  |
| H278 | -0.673769906  | 4.204202153  | -4.809458842  |
| H279 | -3.593933157  | 5.875659188  | -3.672201066  |
| H280 | 0.800469983   | 8.903345944  | 2.939959034   |
| H281 | -0.460670582  | 9.750016482  | 0.101722398   |
| H282 | -0.079269828  | 12.613614168 | 0.393749496   |
| H283 | 2.271690244   | 9.422920211  | 2.082066100   |
| H284 | -2.437527207  | 10.645548480 | 1.740124195   |
| H285 | 4.603740366   | -3.032883788 | -9.160711630  |
| H286 | 4.586383002   | -4.487248438 | -8.145399162  |
| H287 | 7.894801445   | -5.211030060 | -5.124497079  |
| H288 | 5.044519123   | -5.109600309 | -10.408334123 |
| H289 | 3.508001593   | -5.594731442 | -10.113647282 |
| H290 | 5.489619231   | 4.766504715  | -0.954579019  |
| H291 | 5.728321466   | 7.420242955  | 0.525114526   |
| H292 | 4.824242497   | 8.088491799  | -3.596058735  |
| H293 | 4.111559771   | 5.596952474  | -0.167874485  |
| H294 | 6.808357073   | 8.034535193  | -0.537858724  |
| H295 | 5.414054465   | 2.808798602  | -6.789526850  |

|       |              |               |              |
|-------|--------------|---------------|--------------|
| H296  | 5.967666882  | 6.744958112   | -2.320471237 |
| H297  | 5.321246285  | -7.019813072  | 4.990639013  |
| H298  | 7.063684529  | -7.899038571  | 2.623305730  |
| H299  | 3.646235389  | 1.366569105   | -6.815372387 |
| H300  | 5.084460341  | -0.106045702  | 3.147757678  |
| H301  | 0.562450020  | 1.545917276   | -8.653857243 |
| H302  | -1.107635540 | -2.126152426  | -4.418457916 |
| H303  | 0.473816497  | 2.067038013   | -6.967857277 |
| H304  | 4.303656268  | -4.487480848  | 4.514237859  |
| H305  | 2.121667202  | 0.028092431   | -6.576533149 |
| H306  | 3.949056365  | -5.088037327  | 2.887888798  |
| H307  | 4.785769160  | -7.306964426  | 3.317988260  |
| H308  | 6.440987858  | -5.494437241  | 2.567851844  |
| H309  | 6.691505715  | -5.080133429  | 4.270686379  |
| H310  | -5.208183298 | -0.806761423  | -6.423269974 |
| H311  | 5.935220715  | -9.479638095  | 4.898794980  |
| H312  | 4.987333459  | -11.790868352 | 3.131137643  |
| H313  | 0.219994161  | -0.008079028  | -4.22323078  |
| H314  | 6.301769302  | -11.841077340 | 5.737185824  |
| H315  | 4.742373923  | -12.156883469 | 5.349894837  |
| H316  | 5.563573475  | -3.363067069  | 2.038118904  |
| H317  | -0.766782102 | 2.136045217   | -4.897328863 |
| H318  | -3.360260726 | -2.069072940  | -5.459812200 |
| H319  | 7.639122140  | -9.937018825  | -1.675881994 |
| H320  | 6.637796637  | -7.668379673  | -3.782402652 |
| H321  | 6.642453238  | -8.176301304  | -0.107741921 |
| H322  | 6.774270656  | -10.542354377 | -2.818956091 |
| H323  | 4.925128917  | 2.553863131   | -9.529494301 |
| H324  | 6.380909164  | -5.058473623  | -0.241584372 |
| H325  | 2.308390243  | -7.770311291  | 0.834006628  |
| H326  | 3.282830931  | -2.024696615  | -7.611878994 |
| H327  | 3.052533913  | -9.221900587  | -0.852613861 |
| H328  | 3.073263169  | -6.946231173  | -7.023460337 |
| H329  | 2.255369097  | -5.484172481  | -5.129489322 |
| H330  | 6.591740636  | -12.438764528 | 3.491996280  |
| H331  | 5.769884900  | -1.088406871  | 1.898741064  |
| H332  | 8.368531816  | -5.793112947  | 0.797411702  |
| H333  | 7.240331855  | -3.771211139  | -0.146510077 |
| H334  | 8.972225687  | -6.857098464  | 2.798688209  |
| H335  | 3.680322842  | -2.694272603  | 5.087173025  |
| H336  | 3.753097876  | -8.296385205  | -3.687408172 |
| H337  | 4.972002312  | -8.599179570  | -2.445618477 |
| H338  | 1.911927042  | -8.682432106  | -2.095432068 |
| H339  | 1.351976800  | -2.161363555  | -6.147806413 |
| H340  | -3.034180367 | 2.202996148   | -5.971899907 |
| H341  | -5.153037532 | 0.970380619   | -6.578312574 |
| H342  | 2.351176312  | -6.007266273  | 0.632929681  |
| H343  | 8.516884170  | -7.328430756  | 0.585548183  |
| H344  | 7.424877269  | -9.254505764  | 0.670390111  |
| H345  | 4.131210472  | -1.026371148  | 5.038014371  |
| H346  | 5.535833091  | -7.619295408  | -6.734470233 |
| H347  | 6.554355449  | -6.032209809  | -3.153725925 |
| H348  | 0.459676885  | -2.951793050  | -7.481349350 |
| H349  | 4.277792007  | 4.158221729   | -7.010338815 |
| H350  | 7.771847155  | 0.151948089   | 3.934442087  |
| H351  | 7.798395167  | 0.564303828   | 2.204790933  |
| H352  | 9.002100871  | -6.802299254  | -6.460886287 |
| H353  | 8.264305464  | -8.069872654  | -5.733257578 |
| H354  | 10.307570474 | -8.559701769  | -1.671703946 |
| H355  | 8.572621627  | -8.245419485  | -3.116992046 |
| H356  | 11.713095290 | -7.564669654  | -3.828430983 |
| H357  | 10.175690925 | -6.836405897  | -1.270060502 |
| H358  | 10.552733639 | 0.334834018   | 2.180375584  |
| H359  | -2.977282625 | 13.206459811  | 3.720484614  |
| H360  | 10.225013499 | -6.867023469  | 5.534540187  |
| H361  | 9.540094716  | -4.449963073  | 4.396855533  |
| H362  | -4.702857773 | 12.314655180  | 1.403790733  |
| H363  | -4.092820304 | 10.301572459  | 3.655672421  |
| H364  | -5.680612686 | 11.001472456  | 3.292413994  |
| H365  | 1.186842191  | -3.186483988  | -0.797719444 |
| H366  | 4.506039744  | -1.411294461  | -0.031829729 |
| H367  | -6.447244816 | 6.815017725   | -1.567566480 |
| H368  | 0.097947662  | -0.937443456  | -0.499905885 |
| H369  | -2.072617032 | -0.262226231  | -0.876934307 |
| Mo370 | 3.861214715  | -4.396780698  | -2.414884409 |
| N371  | -7.006778131 | -7.180788763  | -0.325767892 |
| N372  | -8.799023060 | -4.641827979  | 1.761760634  |
| N373  | -8.152956170 | -4.942647000  | 4.480632237  |
| N374  | -5.469682715 | -5.792825403  | 4.482471886  |
| N375  | -4.231158785 | -3.394493163  | 3.629250725  |

|      |              |               |               |
|------|--------------|---------------|---------------|
| N376 | -4.899558243 | -1.762610545  | 5.900020816   |
| N377 | -3.662187374 | -3.103842552  | 8.132961949   |
| N378 | -1.105787882 | -4.441065520  | 7.537429381   |
| N379 | 0.230051240  | -2.531864233  | 6.146088915   |
| N380 | -0.379075169 | 0.387334254   | 6.797997314   |
| N381 | -0.668692353 | 0.207622118   | 9.671144678   |
| N382 | 5.524053074  | -11.531029349 | 5.150194770   |
| N383 | 6.390129605  | -9.273217357  | 4.003385933   |
| N384 | 5.065690431  | -3.320587710  | 2.931379485   |
| N385 | 4.251763884  | -1.960266381  | 4.657134607   |
| N386 | 5.386635601  | -1.030483764  | 2.854228636   |
| N387 | 9.047172445  | -6.974219176  | 3.833646966   |
| N388 | -5.865278856 | -2.949390666  | -2.918079067  |
| N389 | -1.940091103 | -5.586412179  | -3.194929552  |
| N390 | -6.085219891 | -0.445139095  | -2.176481228  |
| N391 | -8.350265487 | 0.660636618   | -0.955828111  |
| N392 | -7.845615130 | 0.358953469   | 1.792266977   |
| N393 | -5.689933935 | 2.096605991   | 2.27183129    |
| N394 | -3.133487510 | 2.676060967   | -1.102041843  |
| N395 | -2.504788466 | 0.649992159   | -0.726022964  |
| N396 | -6.318727550 | 4.734714219   | 2.869866686   |
| N397 | -9.758431056 | 7.734886393   | 1.592181843   |
| N398 | -9.664470254 | 9.519000544   | 2.908062276   |
| N399 | 9.473065936  | 2.678735740   | 2.400569821   |
| N400 | 6.287132675  | 7.185346904   | -0.301710678  |
| N401 | 4.214091381  | 8.457945186   | -2.871648778  |
| N402 | 1.560179977  | 7.844171666   | -3.346560447  |
| N403 | -3.169022776 | 6.403267216   | -4.455821007  |
| N404 | -3.360253437 | 8.246525349   | -5.886358833  |
| N405 | -4.449444392 | 8.240318981   | -3.842420158  |
| N406 | 0.659353869  | 6.320320941   | -1.071218464  |
| N407 | 0.972295279  | 8.212858827   | 0.975444522   |
| N408 | -0.367147948 | 10.601025699  | 0.655585968   |
| N409 | -1.883524492 | 10.345501582  | -3.048447767  |
| N410 | -2.745672635 | 11.614105387  | 1.709464264   |
| N411 | 4.095462214  | -4.766239827  | -10.244307195 |
| N412 | 2.464154522  | -2.581925652  | -7.873281685  |
| N413 | 1.423917731  | 0.217553157   | -7.315069085  |
| N414 | 3.507657159  | 2.215770147   | -7.369296329  |
| N415 | -1.722670049 | -2.997808531  | -10.079102421 |
| N416 | -3.288017304 | -1.181366861  | -8.494453272  |
| N417 | 8.132975075  | -7.089672276  | -6.001927109  |
| N418 | 4.265266196  | -5.682469096  | -4.364451287  |
| N419 | 3.668996817  | -6.631542306  | -6.262376769  |
| N420 | 9.238894055  | -7.469667377  | -3.075278754  |
| N421 | 0.058962117  | 2.276723517   | -0.193901041  |
| N422 | 2.176273303  | -0.837981779  | 0.928546036   |
| N423 | 0.875651736  | 1.716337726   | -0.741107959  |
| N424 | 2.538326004  | -0.796114332  | 1.978435429   |
| O425 | -6.577742191 | -5.125704848  | 1.650105006   |
| O426 | -7.296801685 | -2.828385686  | 4.503745237   |
| O427 | -5.315104085 | -5.209987794  | 6.684248457   |
| O428 | -2.463988075 | -4.001771389  | 4.933351476   |
| O429 | -3.057463746 | -0.531143874  | 5.404143362   |
| O430 | -3.275995939 | -1.011494237  | 8.980257923   |
| O431 | -0.543865860 | -4.022570178  | 9.718250006   |
| O432 | 2.184780110  | -3.748931317  | 6.074206220   |
| O433 | 1.901828798  | 0.286299150   | 6.667152270   |
| O434 | 0.840765547  | 1.903547339   | 9.720832514   |
| O435 | 1.538998576  | -0.282685137  | 12.460261866  |
| O436 | 7.056706262  | -10.336334890 | 2.061428342   |
| O437 | 8.038320911  | -7.707485357  | 5.766026343   |
| O438 | 11.571991402 | -4.523360541  | 4.549886097   |
| O439 | -5.625684150 | -0.843004780  | 0.035499179   |
| O440 | -3.698746785 | -4.398218265  | -4.013910354  |
| O441 | -7.119340796 | 2.504459379   | -0.406045459  |
| O442 | -6.332276853 | 3.047518919   | -3.347161113  |
| O443 | -9.772948667 | 1.504462724   | 2.283586945   |
| O444 | -5.635991078 | 1.498800810   | 4.476469888   |
| O445 | -4.247854375 | 5.051302062   | 3.779791120   |
| O446 | -6.562889324 | 7.263623298   | 5.336978194   |
| O447 | 10.788397868 | -0.059992322  | 4.169890272   |
| O448 | 3.561476138  | 4.690472995   | 3.934950970   |
| O449 | 3.604256851  | 8.373101723   | -0.677300751  |
| O450 | 0.990966767  | 10.066693414  | -3.529616133  |
| O451 | -1.400533635 | 7.196768446   | -1.532091005  |
| O452 | -0.695135889 | 7.165790063   | 2.155319867   |
| O453 | 2.426257934  | 5.682471274   | 1.445558401   |
| O454 | 0.853823258  | 11.599519540  | 2.317099021   |
| O455 | -2.501247724 | 13.580191828  | 0.581679640   |

|                                 |              |               |               |
|---------------------------------|--------------|---------------|---------------|
| O456                            | -3.259565978 | 11.011061898  | -1.348682197  |
| O457                            | -4.953395208 | 13.706846752  | 3.619611434   |
| O458                            | -5.501967116 | 6.841493017   | -1.322633765  |
| O459                            | 1.755772697  | -4.579774261  | -8.758598124  |
| O460                            | -0.263380175 | -0.746645969  | -8.532272347  |
| O461                            | 2.125927706  | 3.589868879   | -8.537807281  |
| O462                            | 5.807666931  | 4.353000726   | -9.141847086  |
| O463                            | -5.005790736 | -2.630753093  | -8.873912939  |
| O464                            | -1.473426534 | -6.595944430  | -6.010345236  |
| O465                            | 0.452918050  | -5.771247954  | -6.777986451  |
| O466                            | -4.015222647 | 2.319978746   | -8.445309313  |
| O467                            | 9.935328153  | -5.411668426  | -3.720646260  |
| O468                            | 12.665725198 | -6.991465168  | -2.116086341  |
| O469                            | 0.312658444  | -6.263305584  | -1.321001362  |
| O470                            | -0.234626589 | -7.363634769  | 0.562836555   |
| O471                            | 5.140770664  | -10.905232354 | -3.349671256  |
| O472                            | 2.879317965  | -10.955043985 | -3.332877237  |
| O473                            | 5.105100739  | -5.857770208  | -1.343413757  |
| O474                            | 5.034529453  | -7.547132865  | 0.136762957   |
| O475                            | 2.624741301  | -6.106564528  | -2.088375364  |
| O476                            | 8.952494445  | -6.553420117  | 1.038262825   |
| O477                            | 6.990574404  | -4.564585060  | 0.365256339   |
| O478                            | -4.379450441 | 4.748814014   | -2.452921742  |
| O479                            | 7.725928470  | -10.435264214 | -2.518875567  |
| O480                            | 7.526585892  | -8.632001341  | -0.093395430  |
| S481                            | 3.563746552  | 4.962053607   | -2.449661058  |
| S482                            | 2.074591976  | 1.961178860   | -3.499613997  |
| S483                            | 2.069218491  | -3.387477333  | -3.622239076  |
| S484                            | 3.721357960  | 1.800275522   | -0.282194246  |
| S485                            | 0.515492360  | -0.920544314  | -1.797424610  |
| S486                            | 4.057188652  | -0.806296074  | -5.567218719  |
| S487                            | 3.503098014  | -3.518613553  | -0.259941840  |
| S488                            | 5.664144746  | 1.716435990   | -3.254829079  |
| S489                            | 5.706908352  | -3.087310362  | -3.134339128  |
| S490                            | 6.477143324  | -0.847012215  | -0.512935087  |
| end                             |              |               |               |
| <b>transition state S=3/2</b>   |              |               |               |
| <b>bm52rda6nhntg_2_53254.76</b> |              |               |               |
| Fe( 139)                        | -2.250       | C1            | -7.735209417  |
| Fe( 140)                        | -0.979       | C2            | -8.114105303  |
| Fe( 141)                        | -2.580       | C3            | -8.573825814  |
| Fe( 142)                        | 2.740        | C4            | -7.941208775  |
| Fe( 143)                        | 2.749        | C5            | -7.511264870  |
| Fe( 144)                        | 1.876        | C6            | -5.985882046  |
| Fe( 145)                        | 1.460        | C7            | -4.012390414  |
|                                 |              | C8            | -3.483981502  |
|                                 |              | C9            | -3.901227747  |
|                                 |              | C10           | -3.913003414  |
|                                 |              | C11           | -4.937788471  |
|                                 |              | C12           | -3.866778996  |
|                                 |              | C13           | -2.863467645  |
|                                 |              | C14           | -1.393639505  |
|                                 |              | C15           | 0.248747231   |
|                                 |              | C16           | 0.987456068   |
|                                 |              | C17           | 0.660180992   |
|                                 |              | C18           | 0.782872534   |
|                                 |              | C19           | -0.237589982  |
|                                 |              | C20           | -0.005015529  |
|                                 |              | C21           | -0.078428630  |
|                                 |              | C22           | -0.366030732  |
|                                 |              | C23           | -0.004229201  |
|                                 |              | C24           | -1.697485654  |
|                                 |              | C25           | -1.768219705  |
|                                 |              | C26           | -1.876712331  |
|                                 |              | C27           | -0.411987766  |
|                                 |              | C28           | 1.052046369   |
|                                 |              | C29           | 5.890915249   |
|                                 |              | C30           | 6.512863477   |
|                                 |              | C31           | 6.796255774   |
|                                 |              | C32           | 8.020808884   |
|                                 |              | C33           | 5.621958758   |
|                                 |              | C34           | 5.962454181   |
|                                 |              | C35           | 4.724313616   |
|                                 |              | C36           | 4.892923366   |
|                                 |              | C37           | 10.274026058  |
|                                 |              | C38           | 10.481655935  |
|                                 |              | C39           | -5.333575909  |
|                                 |              | C40           | -5.694980874  |
|                                 |              | C41           | -3.795988912  |
|                                 |              | C42           | -3.243955915  |
|                                 |              | C43           | -2.976712902  |
|                                 |              |               | -5.363591469  |
|                                 |              |               | -6.512166683  |
|                                 |              |               | -3.447217573  |
|                                 |              |               | -3.709666275  |
|                                 |              |               | -5.307493029  |
|                                 |              |               | -5.426143075  |
|                                 |              |               | -5.732804300  |
|                                 |              |               | -4.296278707  |
|                                 |              |               | -1.968895292  |
|                                 |              |               | -1.345933411  |
|                                 |              |               | -1.187080394  |
|                                 |              |               | -1.742608898  |
|                                 |              |               | -3.760753209  |
|                                 |              |               | -4.064012156  |
|                                 |              |               | -4.769902457  |
|                                 |              |               | -3.632898042  |
|                                 |              |               | -1.379773309  |
|                                 |              |               | -0.169715720  |
|                                 |              |               | -1.161010577  |
|                                 |              |               | 0.202088349   |
|                                 |              |               | -2.328009801  |
|                                 |              |               | 1.571118655   |
|                                 |              |               | 1.240159665   |
|                                 |              |               | 2.347576830   |
|                                 |              |               | 3.512864431   |
|                                 |              |               | 2.859842279   |
|                                 |              |               | -0.098104102  |
|                                 |              |               | -0.370230304  |
|                                 |              |               | -11.610900439 |
|                                 |              |               | -10.330453052 |
|                                 |              |               | -7.908886699  |
|                                 |              |               | -7.518694755  |
|                                 |              |               | -6.947130569  |
|                                 |              |               | -5.506419446  |
|                                 |              |               | -4.615355334  |
|                                 |              |               | -2.108408733  |
|                                 |              |               | -6.553964378  |
|                                 |              |               | -5.056357761  |
|                                 |              |               | -2.674264791  |
|                                 |              |               | -1.239565141  |
|                                 |              |               | -2.820034867  |
|                                 |              |               | -4.255697202  |
|                                 |              |               | -4.744146900  |
|                                 |              |               | 1.283768508   |
|                                 |              |               | 0.340776568   |
|                                 |              |               | 2.573017553   |
|                                 |              |               | 3.936575240   |
|                                 |              |               | 5.738595469   |
|                                 |              |               | 5.671450232   |
|                                 |              |               | 4.272687359   |
|                                 |              |               | 4.306026837   |
|                                 |              |               | 3.639536970   |
|                                 |              |               | 5.044344417   |
|                                 |              |               | 7.222396357   |
|                                 |              |               | 8.172827845   |
|                                 |              |               | 9.142221408   |
|                                 |              |               | 8.818125354   |
|                                 |              |               | 7.122591983   |
|                                 |              |               | 6.407117349   |
|                                 |              |               | 5.396755113   |
|                                 |              |               | 6.337674395   |
|                                 |              |               | 4.158819856   |
|                                 |              |               | 3.492951813   |
|                                 |              |               | 3.173862063   |
|                                 |              |               | 7.631133625   |
|                                 |              |               | 9.089643132   |
|                                 |              |               | 7.494653468   |
|                                 |              |               | 8.487331432   |
|                                 |              |               | 6.058802837   |
|                                 |              |               | 11.066009495  |
|                                 |              |               | 11.349140976  |
|                                 |              |               | 3.735041661   |
|                                 |              |               | 3.187047191   |
|                                 |              |               | 3.688084328   |
|                                 |              |               | 4.535930942   |
|                                 |              |               | 3.932375250   |
|                                 |              |               | 3.562301017   |
|                                 |              |               | 3.513764972   |
|                                 |              |               | 3.488095129   |
|                                 |              |               | 4.480969170   |
|                                 |              |               | 4.468272705   |
|                                 |              |               | -1.569961982  |
|                                 |              |               | -1.138126351  |
|                                 |              |               | -1.507708261  |
|                                 |              |               | -1.623863312  |
|                                 |              |               | -3.048223419  |

|      |               |              |              |
|------|---------------|--------------|--------------|
| C44  | -6.181121006  | 0.999812201  | -2.043548053 |
| C45  | -7.268418579  | 1.458507203  | -1.061264255 |
| C46  | -6.355222821  | 1.610758119  | -3.439614684 |
| C47  | -9.422592508  | 0.942976259  | -0.012146886 |
| C48  | -9.023535027  | 0.959051346  | 1.466632365  |
| C49  | -7.318189988  | 0.439402335  | 3.146761135  |
| C50  | -6.146650247  | 1.399433891  | 3.360811246  |
| C51  | -4.601196807  | 3.052524712  | 2.436111801  |
| C52  | -5.042383175  | 4.359770263  | 3.134357594  |
| C53  | -4.012340446  | 3.489703053  | 1.086078577  |
| C54  | -3.409614793  | 2.423067236  | 0.235299455  |
| C55  | -3.008680952  | 1.132119954  | 0.467595109  |
| C56  | -2.581814806  | 1.596263213  | -1.670358828 |
| C57  | -6.842441250  | 6.038189361  | 3.245514777  |
| C58  | -6.744992414  | 6.197897545  | 4.761692064  |
| C59  | -8.319204813  | 6.095051142  | 2.787679588  |
| C60  | -8.939641938  | 7.456703644  | 2.669381843  |
| C61  | -8.871684711  | 8.559635281  | 3.498373670  |
| C62  | -10.187668186 | 8.977587014  | 1.765309256  |
| C63  | 9.240154697   | 1.639572631  | 3.419901128  |
| C64  | 10.279933772  | 0.546488643  | 3.252803085  |
| C65  | 7.850272788   | 0.985984833  | 3.232897667  |
| C66  | 6.712546626   | 1.957071003  | 3.444644835  |
| C67  | 6.139225477   | 2.149423702  | 4.714004448  |
| C68  | 6.198343214   | 2.706677773  | 2.370902354  |
| C69  | 5.088647711   | 3.054025491  | 4.909398734  |
| C70  | 5.164554305   | 3.625629098  | 2.552749969  |
| C71  | 4.603918712   | 3.792106428  | 3.821805146  |
| C72  | 5.371302535   | 6.859036764  | -1.396089346 |
| C73  | 4.316838812   | 7.959907055  | -1.602528838 |
| C74  | 4.700893425   | 5.521037407  | -1.088905665 |
| C75  | 3.310238860   | 9.547581762  | -3.204840665 |
| C76  | 1.836207715   | 9.168019622  | -3.371099661 |
| C77  | 0.218782531   | 7.270374155  | -3.330820717 |
| C78  | -0.245860006  | 6.928175836  | -1.891745349 |
| C79  | 0.247813231   | 6.027867630  | -4.248006736 |
| C80  | -1.005335487  | 5.150292974  | -4.349914465 |
| C81  | -2.151696863  | 5.683238109  | -5.225876002 |
| C82  | -3.674623353  | 7.601751508  | -4.745600132 |
| C83  | 0.273081223   | 5.970961987  | 0.298565858  |
| C84  | 0.118454714   | 7.188066554  | 1.222635333  |
| C85  | 1.269360050   | 4.998725604  | 0.963109905  |
| C86  | 1.194860857   | 9.254473011  | 1.969055760  |
| C87  | 0.552484347   | 10.599304574 | 1.664216132  |
| C88  | -0.851790150  | 11.872980569 | 0.135019255  |
| C89  | -2.126870195  | 12.427569880 | 0.815172789  |
| C90  | -1.006058142  | 11.887059940 | -1.387989822 |
| C91  | -2.153790466  | 11.026269508 | -1.900264344 |
| C92  | -4.070444882  | 11.946736700 | 2.225893791  |
| C93  | -3.988004829  | 13.051508090 | 3.271603469  |
| C94  | -4.731312392  | 10.682444951 | 2.840814146  |
| C95  | -4.972094687  | 9.609225216  | 1.804483203  |
| C96  | -6.149632912  | 9.611110773  | 1.041586375  |
| C97  | -4.008605137  | 8.624739010  | 1.532689238  |
| C98  | -6.353102425  | 8.675852474  | 0.025628243  |
| C99  | -4.182945003  | 7.695969921  | 0.502021573  |
| C100 | -5.355881299  | 7.738548050  | -0.245784485 |
| C101 | 4.087695386   | -3.984851868 | -9.000382634 |
| C102 | 2.662305972   | -3.732659608 | -8.540944812 |
| C103 | 1.213427252   | -2.194503020 | -7.231850621 |
| C104 | 0.714808517   | -0.840272662 | -7.750423010 |
| C105 | 1.127660338   | 1.583982882  | -7.708356827 |
| C106 | 2.306700466   | 2.531488793  | -7.918885973 |
| C107 | 4.588099237   | 3.198714856  | -7.414320329 |
| C108 | 5.153419635   | 3.382667768  | -8.808872638 |
| C109 | -2.758958358  | -3.494542761 | -9.158375002 |
| C110 | -3.783907598  | -2.402190261 | -8.830025560 |
| C111 | -2.268259264  | -4.165612383 | -7.854556273 |
| C112 | -1.537851206  | -5.488568694 | -8.149375622 |
| C113 | -0.863086010  | -6.015959868 | -6.903244789 |
| C114 | -4.187583258  | -0.085520089 | -8.168992251 |
| C115 | -3.708314902  | 1.199309017  | -8.814884533 |
| C116 | -4.573580236  | 0.046868285  | -6.674172161 |
| C117 | -3.340239735  | 0.067221291  | -5.816567510 |
| C118 | -2.620083868  | 1.258458955  | -5.620567577 |
| C119 | -2.796783587  | -1.140764410 | -5.349605261 |
| C120 | -1.344033848  | 1.221188313  | -5.048644990 |
| C121 | -1.521768508  | -1.177158138 | -4.778181756 |
| C122 | -0.779192766  | 0.002165818  | -4.660498987 |
| C123 | 7.920533853   | -6.251489444 | -4.790693645 |

|       |              |               |              |
|-------|--------------|---------------|--------------|
| C124  | 9.101339865  | -6.330617893  | -3.808629406 |
| C125  | 6.608060137  | -6.605913115  | -4.078830175 |
| C126  | 5.347878705  | -6.387572138  | -4.851988868 |
| C127  | 4.968945573  | -6.964139017  | -6.047203301 |
| C128  | 3.253855888  | -5.846668800  | -5.204736792 |
| C129  | 10.312221740 | -7.546397181  | -2.098315636 |
| C130  | 11.666909137 | -7.328769649  | -2.735757626 |
| C131  | 0.619889229  | -6.915610627  | -0.182821526 |
| C132  | 2.110877128  | -6.964955835  | 0.129607862  |
| C133  | 3.025406087  | -7.098680860  | -1.124766498 |
| C134  | 2.916082453  | -8.533905284  | -1.704514765 |
| C135  | 3.952270396  | -8.876819082  | -2.777530352 |
| C136  | 3.980294019  | -10.367214831 | -3.177951031 |
| C137  | 4.491024273  | -6.863985646  | -0.720779772 |
| C138  | 3.586075723  | -0.697981325  | -2.233074532 |
| Fe139 | 3.801534712  | -2.003779936  | -3.681037071 |
| Fe140 | 2.126449871  | 0.739523234   | -1.645845538 |
| Fe141 | 5.042302867  | 0.471501154   | -1.533687698 |
| Fe142 | 3.789874199  | 0.516212627   | -3.796331167 |
| Fe143 | 3.836911614  | 2.711618463   | -2.296386217 |
| Fe144 | 4.812154667  | -2.036070380  | -1.329526040 |
| Fe145 | 2.270385014  | -2.423229449  | -1.486207169 |
| H146  | -6.339965085 | -7.521111878  | 0.351872006  |
| H147  | -6.512771797 | -6.525203527  | -0.929733156 |
| H148  | -9.713867987 | -4.802988652  | 1.380877552  |
| H149  | -8.828689251 | -6.131565525  | -0.407020094 |
| H150  | -8.671606079 | -7.248039458  | 0.945736089  |
| H151  | -7.918142095 | -2.729205950  | 2.058691394  |
| H152  | -8.688512146 | -5.616045820  | 3.963863512  |
| H153  | -9.544817453 | -2.959876577  | 2.733057491  |
| H154  | -7.929275726 | -6.268816260  | 6.064409892  |
| H155  | -6.052281443 | -5.849888385  | 3.653445088  |
| H156  | -7.732371417 | -4.559593346  | 6.511061037  |
| H157  | -2.902453515 | -1.789535743  | 3.220630989  |
| H158  | -5.026725110 | -3.702825889  | 3.078741745  |
| H159  | -3.778660328 | -6.192301880  | 3.302886821  |
| H160  | -4.791068604 | -0.099943649  | 7.177825908  |
| H161  | -5.678362237 | -2.303057582  | 5.528176667  |
| H162  | -3.493101095 | -6.293673888  | 5.058552573  |
| H163  | -4.634632300 | -1.452683876  | 3.003983054  |
| H164  | -4.235996383 | -3.656585954  | 7.502529340  |
| H165  | -5.926683141 | -1.391905622  | 7.656226776  |
| H166  | -0.413182364 | -3.274382154  | 3.620933022  |
| H167  | -0.681842277 | -2.155680874  | 2.268380099  |
| H168  | 0.965790482  | -2.443593999  | 2.847749311  |
| H169  | -1.272402079 | -1.165673757  | 4.526254837  |
| H170  | -3.352967943 | -4.715550067  | 9.385463863  |
| H171  | -1.881737767 | 2.044391121   | 5.323532312  |
| H172  | -1.449015515 | -0.257427105  | 9.206658286  |
| H173  | -1.731251890 | 3.177163650   | 9.533491472  |
| H174  | 0.880144662  | 0.192013947   | 2.850523297  |
| H175  | 0.103829968  | 1.016534635   | 4.223259546  |
| H176  | 9.308517650  | 1.998538314   | 4.464869283  |
| H177  | -2.831497837 | 3.396444048   | 5.961545877  |
| H178  | -2.708176042 | 4.064954232   | 8.340962531  |
| H179  | -1.065497975 | 3.559842934   | 5.798522876  |
| H180  | -0.933486136 | 4.213510867   | 8.326251269  |
| H181  | -2.519944072 | 1.645296360   | 7.722685223  |
| H182  | 0.459341585  | 2.212409590   | 7.286194873  |
| H183  | -1.274030633 | 0.055606429   | 6.407772475  |
| H184  | -0.871027961 | 0.456510385   | 2.860933393  |
| H185  | 1.563841184  | 4.233781079   | 0.228978720  |
| H186  | 0.735189348  | 4.503166396   | 1.786769430  |
| H187  | 2.668129165  | 5.309714799   | 2.318070467  |
| H188  | 3.219031114  | 4.679104869   | 4.854272422  |
| H189  | 4.769217356  | 4.190731899   | 1.708442240  |
| H190  | 6.598948537  | 2.552591770   | 1.366134423  |
| H191  | 6.509939810  | 1.575792557   | 5.568294926  |
| H192  | -0.766222293 | -2.625180544  | 6.363688882  |
| H193  | 0.235026666  | -5.633200016  | 6.441648192  |
| H194  | 0.837668130  | -5.046521602  | 8.006337646  |
| H195  | -1.846127207 | -4.500293745  | 6.831597876  |
| H196  | -2.852074358 | -3.139218827  | 10.045655534 |
| H197  | 4.642699385  | 3.177947542   | 5.900337092  |
| H198  | 1.686770970  | -1.583695005  | 5.071575365  |
| H199  | -0.755671415 | 0.704426885   | 11.738909211 |
| H200  | -0.967511658 | -1.014137760  | 11.319827845 |
| H201  | 1.647451906  | -0.729495249  | 10.477828562 |
| H202  | 11.150946279 | -7.043332695  | 4.029936928  |
| H203  | -1.748056131 | -5.979452083  | -4.124566100 |

|      |               |              |               |
|------|---------------|--------------|---------------|
| H204 | 1.237310285   | -6.046350550 | -1.784751280  |
| H205 | -2.269956016  | -6.238381255 | -8.482852679  |
| H206 | -0.800459824  | -5.344347351 | -8.952050684  |
| H207 | -3.118987761  | -4.367541074 | -7.185156372  |
| H208 | -3.082024629  | 1.048105546  | -9.725356693  |
| H209 | -3.347456974  | -4.240825769 | -9.713673796  |
| H210 | -3.352536306  | -2.190749195 | -2.298128461  |
| H211 | -3.946433455  | -4.970846629 | -1.162435905  |
| H212 | -2.275110497  | -1.029344708 | -8.428991142  |
| H213 | -5.123099080  | -0.322371028 | -8.717395322  |
| H214 | -1.036750002  | -2.409504311 | -9.574010726  |
| H215 | -1.316264351  | -5.842495946 | -2.423383490  |
| H216 | -1.609265858  | -3.463440716 | -7.320090995  |
| H217 | -1.208552074  | -3.777017584 | -10.475247895 |
| H218 | -6.742811997  | -3.457954948 | -2.861403970  |
| H219 | -3.473247315  | -2.414780475 | -0.536949704  |
| H220 | 0.830272712   | -5.289716884 | -7.582591533  |
| H221 | -2.316260095  | -4.331312939 | -1.038563282  |
| H222 | -3.829957414  | 2.608998201  | 3.081608870   |
| H223 | -3.053244260  | 0.520170488  | 1.359113857   |
| H224 | -8.131743988  | 0.778602101  | 3.802582259   |
| H225 | -7.261008550  | -0.070521196 | 1.073773275   |
| H226 | -6.927867830  | 4.084027436  | 2.373358444   |
| H227 | -8.332055915  | 8.748252523  | 4.419030418   |
| H228 | -6.898055786  | 5.243839354  | 5.323366846   |
| H229 | -8.923804098  | 5.444074610  | 3.444171874   |
| H230 | -6.260216690  | 6.840504587  | 2.765858409   |
| H231 | -10.859273744 | 9.526640920  | 1.111093675   |
| H232 | -3.242640212  | 4.248061285  | 1.301355800   |
| H233 | -4.800720843  | 3.991102823  | 0.501883026   |
| H234 | -9.833885505  | 10.454433748 | 3.258521607   |
| H235 | -8.366947706  | 5.647363284  | 1.782316622   |
| H236 | -6.171074347  | 2.028163072  | 1.373207244   |
| H237 | -7.011318684  | -0.552397259 | 3.510795691   |
| H238 | -9.862269406  | 1.928882233  | -0.218837526  |
| H239 | -2.247879390  | 1.493513809  | -2.700574042  |
| H240 | -10.210533657 | 0.191204530  | -0.149758622  |
| H241 | 10.293303617  | 3.229612627  | 2.676126299   |
| H242 | 8.685860035   | 3.323944182  | 2.398187512   |
| H243 | 1.550733369   | 5.960046189  | -1.441868309  |
| H244 | -0.712668151  | 5.484072001  | 0.269308433   |
| H245 | 1.733201914   | 8.064555954  | 0.306437767   |
| H246 | -3.439556475  | 3.547048324  | -1.609229326  |
| H247 | -5.110403805  | 4.163256750  | -2.784993525  |
| H248 | -6.703615844  | 3.397821000  | -4.170794113  |
| H249 | -4.795175165  | 5.413351743  | -1.849050898  |
| H250 | -5.528600610  | 1.254244339  | -4.076143946  |
| H251 | -7.309656440  | 1.281534618  | -3.878269884  |
| H252 | -0.052198913  | 11.612714492 | -1.859713585  |
| H253 | -1.233107298  | 12.924992744 | -1.677839737  |
| H254 | -0.907862117  | 10.188903715 | -3.328227989  |
| H255 | -2.586078445  | 9.647860809  | -3.306515331  |
| H256 | -3.700917401  | 9.192213167  | -6.042176546  |
| H257 | -2.647563459  | 4.848929294  | -5.745069882  |
| H258 | -7.280714752  | 8.681755080  | -0.552682492  |
| H259 | -3.096815310  | 8.560187941  | 2.131798237   |
| H260 | -4.686634750  | 7.776389886  | -2.958948610  |
| H261 | 1.070534247   | 5.383445198  | -3.898858379  |
| H262 | 2.347222602   | 7.200848714  | -3.227481614  |
| H263 | -1.388282775  | 4.890795138  | -3.350550589  |
| H264 | -8.367520959  | -0.209828308 | -1.485876794  |
| H265 | 3.645787335   | 10.012951534 | -4.141307056  |
| H266 | -6.096833089  | -0.953159957 | -3.070429534  |
| H267 | 0.534386832   | 6.369278234  | -5.256137402  |
| H268 | -3.392775141  | 6.981405960  | 0.267883097   |
| H269 | 3.341046009   | 10.314164236 | -2.417044976  |
| H270 | -2.962024905  | 7.758371691  | -6.675314673  |
| H271 | -5.107331265  | 8.943194541  | -4.167527137  |
| H272 | -5.175718099  | -3.520800906 | -3.440886431  |
| H273 | -5.764453842  | -3.333642457 | -0.793677997  |
| H274 | -6.927526968  | 10.351052796 | 1.244024792   |
| H275 | -5.251783902  | 1.389963867  | -1.605100062  |
| H276 | -0.482255375  | 8.025404008  | -3.700055198  |
| H277 | -1.739438251  | 6.342175993  | -6.000326232  |
| H278 | -0.673925999  | 4.206196956  | -4.803765178  |
| H279 | -3.596016473  | 5.874852302  | -3.672575836  |
| H280 | 0.802951905   | 8.913211346  | 2.938881783   |
| H281 | -0.462271522  | 9.754875844  | 0.101413766   |
| H282 | -0.083738596  | 12.619553759 | 0.389775184   |
| H283 | 2.272730353   | 9.433505019  | 2.078893527   |

|      |              |               |               |
|------|--------------|---------------|---------------|
| H284 | -2.439465688 | 10.649106667  | 1.738476094   |
| H285 | 4.605320143  | -3.027257102  | -9.157211954  |
| H286 | 4.590604395  | -4.484625062  | -8.145334425  |
| H287 | 7.886524833  | -5.198186185  | -5.106718000  |
| H288 | 5.045198242  | -5.100811833  | -10.410712891 |
| H289 | 3.509205497  | -5.586627425  | -10.116214665 |
| H290 | 5.493448088  | 4.774358879   | -0.952441045  |
| H291 | 5.723909785  | 7.424189794   | 0.533521645   |
| H292 | 4.822348180  | 8.089613044   | -3.593188996  |
| H293 | 4.116418197  | 5.602361504   | -0.162237038  |
| H294 | 6.807271734  | 8.042551395   | -0.523760496  |
| H295 | 5.405731103  | 2.833814725   | -6.773255067  |
| H296 | 5.972165293  | 6.754993848   | -2.312731289  |
| H297 | 5.314149646  | -7.015987228  | 4.988911059   |
| H298 | 7.059814579  | -7.891745402  | 2.622633031   |
| H299 | 3.643117485  | 1.385601736   | -6.797796515  |
| H300 | 5.106359541  | -0.095881598  | 3.158540698   |
| H301 | 0.561243634  | 1.547134115   | -8.646413350  |
| H302 | -1.098297194 | -2.127040531  | -4.444390069  |
| H303 | 0.476798253  | 2.069252879   | -6.960555378  |
| H304 | 4.294603970  | -4.484611865  | 4.513932371   |
| H305 | 2.122695359  | 0.031852577   | -6.567857236  |
| H306 | 3.947465658  | -5.075401595  | 2.881657156   |
| H307 | 4.780877576  | -7.301678287  | 3.315148779   |
| H308 | 6.435487885  | -5.488269870  | 2.569146804   |
| H309 | 6.685842931  | -5.076233554  | 4.272461657   |
| H310 | -5.217039662 | -0.806914758  | -6.416943187  |
| H311 | 5.933215393  | -9.472111827  | 4.899068345   |
| H312 | 4.981249693  | -11.782860918 | 3.139713666   |
| H313 | 0.230371931  | -0.010091021  | -4.254334031  |
| H314 | 6.310360334  | -11.826448748 | 5.739323786   |
| H315 | 4.750649456  | -12.151505585 | 5.360768572   |
| H316 | 5.560445337  | -3.354791397  | 2.043485345   |
| H317 | -0.767122567 | 2.137847155   | -4.916366280  |
| H318 | -3.364097382 | -2.067790771  | -5.456712890  |
| H319 | 7.632637845  | -9.934946961  | -1.673184990  |
| H320 | 6.634253007  | -7.669320240  | -3.784127407  |
| H321 | 6.633550617  | -8.179216709  | -0.100920554  |
| H322 | 6.768003688  | -10.538634092 | -2.817271798  |
| H323 | 4.933033764  | 2.550753008   | -9.520159694  |
| H324 | 6.394871474  | -5.073553522  | -0.251335626  |
| H325 | 2.301308995  | -7.778428243  | 0.840104822   |
| H326 | 3.286453796  | -2.024626703  | -7.604546907  |
| H327 | 3.032627794  | -9.229331993  | -0.858240859  |
| H328 | 3.052779102  | -6.918488739  | -7.006303060  |
| H329 | 2.246951641  | -5.464108172  | -5.098491170  |
| H330 | 6.587319336  | -12.431995118 | 3.493165197   |
| H331 | 5.771804137  | -1.092870942  | 1.905405856   |
| H332 | 8.369437615  | -5.792981738  | 0.798255605   |
| H333 | 7.244731113  | -3.778701596  | -0.156988942  |
| H334 | 8.972400588  | -6.855156168  | 2.800205805   |
| H335 | 3.696680304  | -2.688270820  | 5.103039687   |
| H336 | 3.743401934  | -8.291496074  | -3.685965725  |
| H337 | 4.959892860  | -8.595809829  | -2.442905433  |
| H338 | 1.898885642  | -8.676028122  | -2.100686509  |
| H339 | 1.356799570  | -2.158610020  | -6.140090159  |
| H340 | -3.046350427 | 2.204380789   | -5.963480512  |
| H341 | -5.163327248 | 0.970169569   | -6.572479444  |
| H342 | 2.341153160  | -6.014530043  | 0.640110814   |
| H343 | 8.512534757  | -7.328694829  | 0.586098708   |
| H344 | 7.421785169  | -9.253884701  | 0.672769993   |
| H345 | 4.135271206  | -1.017774685  | 5.045697486   |
| H346 | 5.514890931  | -7.598463892  | -6.734181894  |
| H347 | 6.549166164  | -6.040979432  | -3.142034092  |
| H348 | 0.462748134  | -2.949736146  | -7.471428962  |
| H349 | 4.268346091  | 4.176531131   | -7.022744924  |
| H350 | 7.771441617  | 0.152249740   | 3.946045756   |
| H351 | 7.801070095  | 0.564075812   | 2.216594063   |
| H352 | 8.992379401  | -6.776560795  | -6.458572775  |
| H353 | 8.261080385  | -8.051316446  | -5.735819128  |
| H354 | 10.306351791 | -8.561469182  | -1.671891801  |
| H355 | 8.566579765  | -8.238502554  | -3.110300820  |
| H356 | 11.709399826 | -7.559664435  | -3.827640460  |
| H357 | 10.177284937 | -6.839631767  | -1.263848652  |
| H358 | 10.551485683 | 0.329326630   | 2.191091996   |
| H359 | -2.980089097 | 13.203251829  | 3.724591161   |
| H360 | 10.218348419 | -6.864241471  | 5.539321733   |
| H361 | 9.548680727  | -4.446157908  | 4.398210327   |
| H362 | -4.706543750 | 12.317288463  | 1.404682956   |
| H363 | -4.093620595 | 10.302164905  | 3.654276410   |



|       |              |               |               |
|-------|--------------|---------------|---------------|
| H364  | -5.682152499 | 11.000808767  | 3.292022356   |
| H365  | 1.259109124  | -3.212902556  | -0.668543006  |
| H366  | 3.913643675  | -1.294828319  | 0.060528861   |
| H367  | -6.448959172 | 6.811679925   | -1.565514569  |
| H368  | 0.175361972  | -0.921687082  | -0.438660399  |
| H369  | -2.082255970 | -0.265891072  | -0.875842746  |
| Mo370 | 3.888896158  | -4.427236218  | -2.401161608  |
| N371  | -7.019518707 | -7.184421495  | -0.334407508  |
| N372  | -8.785398083 | -4.634513931  | 1.760825217   |
| N373  | -8.133919585 | -4.935767960  | 4.477973621   |
| N374  | -5.453359953 | -5.790636217  | 4.478412502   |
| N375  | -4.220953358 | -3.387657795  | 3.615960429   |
| N376  | -4.892742008 | -1.752880916  | 5.885159027   |
| N377  | -3.656563703 | -3.085054804  | 8.123449964   |
| N378  | -1.109204064 | -4.457121628  | 7.542001568   |
| N379  | 0.224644778  | -2.550387895  | 6.141725305   |
| N380  | -0.380477685 | 0.372405191   | 6.791603733   |
| N381  | -0.662019626 | 0.204179116   | 9.669580570   |
| N382  | 5.527862865  | -11.521765004 | 5.155769722   |
| N383  | 6.387541258  | -9.266248559  | 4.003228056   |
| N384  | 5.071096641  | -3.314146079  | 2.941008490   |
| N385  | 4.264876668  | -1.953307570  | 4.670866087   |
| N386  | 5.381112067  | -1.025480448  | 2.855271106   |
| N387  | 9.044817748  | -6.969870084  | 3.835499901   |
| N388  | -5.859176963 | -2.947238469  | -2.912652462  |
| N389  | -1.943258953 | -5.592807123  | -3.194649996  |
| N390  | -6.081782251 | -0.443869757  | -2.170610304  |
| N391  | -8.350825581 | 0.655456441   | -0.950375530  |
| N392  | -7.846718496 | 0.357330514   | 1.798360048   |
| N393  | -5.687486949 | 2.094048353   | 2.273603500   |
| N394  | -3.131488095 | 2.677754396   | -1.101422200  |
| N395  | -2.510138721 | 0.648805681   | -0.727031787  |
| N396  | -6.319239327 | 4.733163723   | 2.865850791   |
| N397  | -9.764883107 | 7.730948624   | 1.590218977   |
| N398  | -9.668352095 | 9.515669204   | 2.905047223   |
| N399  | 9.476610561  | 2.674017937   | 2.410179208   |
| N400  | 6.285624250  | 7.192447075   | -0.292184757  |
| N401  | 4.213676347  | 8.461722331   | -2.868857382  |
| N402  | 1.559480748  | 7.847788739   | -3.344556194  |
| N403  | -3.170605682 | 6.403085241   | -4.455520700  |
| N404  | -3.365483894 | 8.247360268   | -5.884625407  |
| N405  | -4.450717647 | 8.239786816   | -3.839914220  |
| N406  | 0.658829040  | 6.326055360   | -1.068867034  |
| N407  | 0.973304901  | 8.220774280   | 0.975106768   |
| N408  | -0.368999713 | 10.606933054  | 0.653715880   |
| N409  | -1.884392928 | 10.336878020  | -3.042899687  |
| N410  | -2.748736629 | 11.617355703  | 1.708162352   |
| N411  | 4.096588676  | -4.757647193  | -10.243967757 |
| N412  | 2.467338540  | -2.581158269  | -7.865921338  |
| N413  | 1.427314719  | 0.220492335   | -7.309171509  |
| N414  | 3.506903090  | 2.226914688   | -7.363429470  |
| N415  | -1.722231321 | -2.992635582  | -10.068781370 |
| N416  | -3.287241945 | -1.179826755  | -8.480812605  |
| N417  | 8.126053387  | -7.069981955  | -5.998330701  |
| N418  | 4.260253969  | -5.677715045  | -4.346772111  |
| N419  | 3.653095989  | -6.609358966  | -6.246564429  |
| N420  | 9.235509618  | -7.465074275  | -3.069602635  |
| N421  | 0.070608888  | 2.237060555   | -0.179934812  |
| N422  | 2.617032549  | -1.231257215  | 0.405803749   |
| N423  | 0.874742041  | 1.695506110   | -0.761130432  |
| N424  | 2.100640117  | -0.743293507  | 1.305510793   |
| O425  | -6.566254709 | -5.128219740  | 1.638071023   |
| O426  | -7.284087615 | -2.819048448  | 4.503080490   |
| O427  | -5.295149546 | -5.206757397  | 6.680216822   |
| O428  | -2.461777768 | -3.985562228  | 4.935918217   |
| O429  | -3.058233915 | -0.512992063  | 5.381221808   |
| O430  | -3.278122370 | -0.990119837  | 8.968683127   |
| O431  | -0.540313035 | -3.995549526  | 9.711594802   |
| O432  | 2.188304165  | -3.754696809  | 6.098308519   |
| O433  | 1.899810550  | 0.263200044   | 6.661959728   |
| O434  | 0.850447014  | 1.897532885   | 9.707058943   |
| O435  | 1.545795616  | -0.268280999  | 12.461789034  |
| O436  | 7.051752307  | -10.331830156 | 2.061684071   |
| O437  | 8.028919848  | -7.694656891  | 5.767283838   |
| O438  | 11.580456200 | -4.529407631  | 4.546180581   |
| O439  | -5.615582112 | -0.840656500  | 0.040166010   |
| O440  | -3.695099238 | -4.395016926  | -4.013350853  |
| O441  | -7.124757034 | 2.502267077   | -0.399847962  |
| O442  | -6.333771450 | 3.048346301   | -3.340410660  |
| O443  | -9.776686721 | 1.499445704   | 2.287197621   |

|                                    |                     |               |               |              |
|------------------------------------|---------------------|---------------|---------------|--------------|
| O444                               | -5.648390240        | 1.516857034   | 4.483790296   |              |
| O445                               | -4.253173342        | 5.048673128   | 3.786289719   |              |
| O446                               | -6.570556214        | 7.259073840   | 5.335188521   |              |
| O447                               | 10.784383853        | -0.069648120  | 4.180221233   |              |
| O448                               | 3.559628837         | 4.689309494   | 3.940862868   |              |
| O449                               | 3.606857094         | 8.383358697   | -0.673331635  |              |
| O450                               | 0.990553682         | 10.070308472  | -3.526783386  |              |
| O451                               | -1.401274689        | 7.202024571   | -1.529869499  |              |
| O452                               | -0.692560054        | 7.175110182   | 2.158074800   |              |
| O453                               | 2.425956116         | 5.685568724   | 1.447290311   |              |
| O454                               | 0.852458363         | 11.608987580  | 2.312569797   |              |
| O455                               | -2.506362635        | 13.583502279  | 0.579743487   |              |
| O456                               | -3.262660015        | 11.007242690  | -1.346852440  |              |
| O457                               | -4.955447032        | 13.707557867  | 3.621691485   |              |
| O458                               | -5.503299733        | 6.839600397   | -1.322030870  |              |
| O459                               | 1.758064863         | -4.575927238  | -8.757935599  |              |
| O460                               | -0.256813702        | -0.746945691  | -8.528641343  |              |
| O461                               | 2.123526594         | 3.589811395   | -8.543194910  |              |
| O462                               | 5.833115023         | 4.341313339   | -9.134823345  |              |
| O463                               | -5.004586110        | -2.629230680  | -8.862240436  |              |
| O464                               | -1.465959429        | -6.601641750  | -6.010225255  |              |
| O465                               | 0.457530352         | -5.772321347  | -6.780480045  |              |
| O466                               | -4.012131924        | 2.321091171   | -8.433158094  |              |
| O467                               | 9.933759446         | -5.407528297  | -3.714819730  |              |
| O468                               | 12.664831542        | -6.992371677  | -2.115147834  |              |
| O469                               | 0.301760267         | -6.268096274  | -1.314381602  |              |
| O470                               | -0.240968857        | -7.377112026  | 0.562714481   |              |
| O471                               | 5.133897091         | -10.899103494 | -3.351820843  |              |
| O472                               | 2.872256880         | -10.953242394 | -3.335011843  |              |
| O473                               | 5.132346904         | -5.928106593  | -1.373684927  |              |
| O474                               | 5.020645345         | -7.568651937  | 0.158564152   |              |
| O475                               | 2.629733409         | -6.107047710  | -2.073676682  |              |
| O476                               | 8.951671924         | -6.554744820  | 1.037521497   |              |
| O477                               | 6.991695595         | -4.568937181  | 0.357360596   |              |
| O478                               | -4.377356590        | 4.748007172   | -2.450919752  |              |
| O479                               | 7.719338239         | -10.433090176 | -2.516261923  |              |
| O480                               | 7.520125112         | -8.630675130  | -0.091177177  |              |
| S481                               | 3.563228002         | 4.968844241   | -2.442914181  |              |
| S482                               | 2.072147567         | 1.957965061   | -3.526216582  |              |
| S483                               | 2.042670197         | -3.383115284  | -3.481453839  |              |
| S484                               | 3.706468118         | 1.798934270   | -0.293353200  |              |
| S485                               | 0.549594416         | -0.979828829  | -1.756805267  |              |
| S486                               | 4.018663953         | -0.831223701  | -5.546576813  |              |
| S487                               | 3.674918238         | -3.648095530  | -0.218757718  |              |
| S488                               | 5.656130023         | 1.716683508   | -3.264495217  |              |
| S489                               | 5.686417393         | -3.077539111  | -3.158354273  |              |
| S490                               | 6.445512043         | -0.842119450  | -0.449222943  |              |
| end                                |                     |               |               |              |
| product <b>Fe6-NH-NH-a</b> (S=3/2) | bm52rda6nhnth.car_7 |               |               |              |
| Fe( 139) -2.371                    | C1                  | -7.723366809  | -5.351388498  | 1.295039836  |
| Fe( 140) 0.216                     | C2                  | -8.051085073  | -6.511917488  | 0.348151966  |
| Fe( 141) -2.561                    | C3                  | -8.638362588  | -3.470155115  | 2.583278561  |
| Fe( 142) 2.573                     | C4                  | -8.007117606  | -3.737085653  | 3.948065768  |
| Fe( 143) 2.407                     | C5                  | -7.599464881  | -5.343741126  | 5.748139253  |
| Fe( 144) 2.299                     | C6                  | -6.073111385  | -5.460888688  | 5.694628280  |
| Fe( 145) 0.193                     | C7                  | -4.087526858  | -5.775009200  | 4.310516449  |
|                                    | C8                  | -3.535330320  | -4.347436656  | 4.348775438  |
|                                    | C9                  | -3.918930632  | -2.005396075  | 3.732093719  |
|                                    | C10                 | -3.924627892  | -1.408153230  | 5.147084834  |
|                                    | C11                 | -4.960266937  | -1.266771312  | 7.320886818  |
|                                    | C12                 | -3.881886639  | -1.844877809  | 8.250072595  |
|                                    | C13                 | -2.871000870  | -3.883136266  | 9.163988956  |
|                                    | C14                 | -1.391517338  | -4.124228607  | 8.831633812  |
|                                    | C15                 | 0.270865031   | -4.680643518  | 7.099502185  |
|                                    | C16                 | 0.995044378   | -3.545873023  | 6.370388067  |
|                                    | C17                 | 0.667149284   | -1.273414558  | 5.397173867  |
|                                    | C18                 | 0.781468195   | -0.062656055  | 6.339998718  |
|                                    | C19                 | -0.224768730  | -1.050961483  | 4.159327969  |
|                                    | C20                 | 0.077978770   | 0.304015711   | 3.511010212  |
|                                    | C21                 | -0.096217380  | -2.248230006  | 3.209965440  |
|                                    | C22                 | -0.402388202  | 1.632153952   | 7.668512358  |
|                                    | C23                 | -0.048307747  | 1.269361875   | 9.121802772  |
|                                    | C24                 | -1.743103110  | 2.392615532   | 7.538156900  |
|                                    | C25                 | -1.822513644  | 3.552535640   | 8.536736166  |
|                                    | C26                 | -1.934957097  | 2.907754472   | 6.105239062  |
|                                    | C27                 | -0.445940840  | -0.146407314  | 11.047987575 |
|                                    | C28                 | 1.020184469   | -0.414819941  | 11.321744920 |
|                                    | C29                 | 5.885037605   | -11.633752218 | 3.686489151  |
|                                    | C30                 | 6.523077790   | -10.353371136 | 3.159172721  |
|                                    | C31                 | 6.827153510   | -7.943524115  | 3.687367051  |

|      |               |              |              |
|------|---------------|--------------|--------------|
| C32  | 8.056376400   | -7.559117207 | 4.529905221  |
| C33  | 5.656984888   | -6.978799447 | 3.940507067  |
| C34  | 5.998082778   | -5.539104473 | 3.566512958  |
| C35  | 4.761853778   | -4.645436522 | 3.530428930  |
| C36  | 4.867125740   | -2.138891136 | 3.473337001  |
| C37  | 10.291750470  | -6.552735699 | 4.464563445  |
| C38  | 10.462970042  | -5.050143471 | 4.468484598  |
| C39  | -5.326243438  | -2.664900376 | -1.593133014 |
| C40  | -5.695545661  | -1.231703006 | -1.164385301 |
| C41  | -3.789368002  | -2.807451712 | -1.523226842 |
| C42  | -3.236065410  | -4.243466738 | -1.629573484 |
| C43  | -2.965265915  | -4.743548762 | -3.048810873 |
| C44  | -6.172117207  | 1.006628428  | -2.076125042 |
| C45  | -7.255344645  | 1.472882255  | -1.093246163 |
| C46  | -6.347565061  | 1.613489744  | -3.473679283 |
| C47  | -9.411109971  | 0.973781163  | -0.041368837 |
| C48  | -9.010288532  | 0.973425210  | 1.436821043  |
| C49  | -7.308799339  | 0.413896853  | 3.109188434  |
| C50  | -6.121345844  | 1.351737758  | 3.329524146  |
| C51  | -4.599224827  | 3.039115508  | 2.422711085  |
| C52  | -5.026239170  | 4.355122652  | 3.117546607  |
| C53  | -4.001142925  | 3.460092966  | 1.071652227  |
| C54  | -3.382219640  | 2.389389729  | 0.233491816  |
| C55  | -2.902578218  | 1.127263718  | 0.483272462  |
| C56  | -2.529762382  | 1.571586275  | -1.664789160 |
| C57  | -6.822541009  | 6.040426318  | 3.258568592  |
| C58  | -6.698357278  | 6.211757386  | 4.771367295  |
| C59  | -8.306493149  | 6.100947972  | 2.824833604  |
| C60  | -8.916942812  | 7.466054611  | 2.697031717  |
| C61  | -8.858675294  | 8.566496696  | 3.530077840  |
| C62  | -10.136199316 | 8.998105922  | 1.771906746  |
| C63  | 9.251434451   | 1.658828378  | 3.404839398  |
| C64  | 10.304665036  | 0.580482991  | 3.230617738  |
| C65  | 7.869033336   | 0.987967840  | 3.199100374  |
| C66  | 6.720463064   | 1.946336112  | 3.407115313  |
| C67  | 6.134370383   | 2.123987932  | 4.672834083  |
| C68  | 6.219920248   | 2.711870546  | 2.337584247  |
| C69  | 5.085633938   | 3.030468429  | 4.869567604  |
| C70  | 5.188917185   | 3.633150409  | 2.521677468  |
| C71  | 4.617772785   | 3.787325234  | 3.787749090  |
| C72  | 5.377035623   | 6.864630804  | -1.416837661 |
| C73  | 4.318629450   | 7.960842525  | -1.619978810 |
| C74  | 4.710865621   | 5.528195455  | -1.080734971 |
| C75  | 3.305807164   | 9.544505194  | -3.221933276 |
| C76  | 1.830787503   | 9.167436619  | -3.385841672 |
| C77  | 0.213293292   | 7.266822692  | -3.338701498 |
| C78  | -0.249424896  | 6.916779620  | -1.900345872 |
| C79  | 0.248513978   | 6.025938765  | -4.258897592 |
| C80  | -1.000453811  | 5.143582688  | -4.369260560 |
| C81  | -2.150941767  | 5.681207682  | -5.236356021 |
| C82  | -3.680030954  | 7.591264196  | -4.753110352 |
| C83  | 0.274959206   | 5.948472134  | 0.285736398  |
| C84  | 0.108821876   | 7.160552101  | 1.214239599  |
| C85  | 1.282701160   | 4.985129501  | 0.947312013  |
| C86  | 1.181736041   | 9.223976685  | 1.976061555  |
| C87  | 0.549057752   | 10.576183005 | 1.680584193  |
| C88  | -0.838197130  | 11.873307777 | 0.149547307  |
| C89  | -2.114838572  | 12.427074441 | 0.824954951  |
| C90  | -0.980681633  | 11.889721253 | -1.374933770 |
| C91  | -2.138074091  | 11.049957497 | -1.901417846 |
| C92  | -4.065259395  | 11.944885662 | 2.224829159  |
| C93  | -3.982632932  | 13.052863750 | 3.266367014  |
| C94  | -4.726288917  | 10.681299645 | 2.841358995  |
| C95  | -4.964660071  | 9.606681263  | 1.805809581  |
| C96  | -6.134870509  | 9.614562345  | 1.032021213  |
| C97  | -4.005539648  | 8.614934256  | 1.545935982  |
| C98  | -6.334353230  | 8.678920290  | 0.015734572  |
| C99  | -4.176733658  | 7.684356239  | 0.516386896  |
| C100 | -5.341486454  | 7.733833686  | -0.243552575 |
| C101 | 4.075275605   | -3.998203077 | -9.000967458 |
| C102 | 2.649429905   | -3.740805170 | -8.547198043 |
| C103 | 1.196265685   | -2.189773109 | -7.259647368 |
| C104 | 0.699529568   | -0.838489743 | -7.785519394 |
| C105 | 1.105175668   | 1.587152318  | -7.740950049 |
| C106 | 2.293419893   | 2.522887081  | -7.947535565 |
| C107 | 4.586618129   | 3.153263772  | -7.459631418 |
| C108 | 5.079667050   | 3.405730958  | -8.870790302 |
| C109 | -2.738542973  | -3.499186476 | -9.171839611 |
| C110 | -3.760026418  | -2.400032044 | -8.854723186 |
| C111 | -2.253517532  | -4.162436227 | -7.862970212 |

|       |              |               |              |
|-------|--------------|---------------|--------------|
| C112  | -1.538031738 | -5.495991860  | -8.147451492 |
| C113  | -0.874900520 | -6.023016259  | -6.895108741 |
| C114  | -4.157144456 | -0.079807136  | -8.202492861 |
| C115  | -3.670118575 | 1.204341184   | -8.844173516 |
| C116  | -4.550803570 | 0.053519651   | -6.709366603 |
| C117  | -3.325134661 | 0.074560817   | -5.840314430 |
| C118  | -2.603969628 | 1.264547750   | -5.642205855 |
| C119  | -2.794152290 | -1.131390042  | -5.353174999 |
| C120  | -1.336587990 | 1.226969848   | -5.050586626 |
| C121  | -1.531622344 | -1.166366545  | -4.755783377 |
| C122  | -0.783199516 | 0.010343565   | -4.642116176 |
| C123  | 7.925248457  | -6.298369673  | -4.830360578 |
| C124  | 9.102998107  | -6.360074421  | -3.843340395 |
| C125  | 6.611892874  | -6.594987308  | -4.092614521 |
| C126  | 5.347075059  | -6.379835008  | -4.859780193 |
| C127  | 4.966743738  | -6.965924007  | -6.049607028 |
| C128  | 3.247800500  | -5.852794192  | -5.207065526 |
| C129  | 10.311254427 | -7.554219822  | -2.119006805 |
| C130  | 11.670911922 | -7.336565150  | -2.746508957 |
| C131  | 0.650173392  | -6.868329912  | -0.160589229 |
| C132  | 2.145408223  | -6.920269784  | 0.143239959  |
| C133  | 3.048350055  | -7.060678844  | -1.119713722 |
| C134  | 2.946749277  | -8.503138204  | -1.685363607 |
| C135  | 3.980542364  | -8.860724940  | -2.756558569 |
| C136  | 4.000968753  | -10.354813646 | -3.148197395 |
| C137  | 4.515423508  | -6.806495415  | -0.733397814 |
| C138  | 3.595983388  | -0.694884374  | -2.240052983 |
| Fe139 | 3.772765866  | -2.002555383  | -3.725741109 |
| Fe140 | 2.073412566  | 0.695843589   | -1.676757535 |
| Fe141 | 5.014690529  | 0.477472360   | -1.456225739 |
| Fe142 | 3.844777242  | 0.512158228   | -3.749487300 |
| Fe143 | 3.892832635  | 2.708106319   | -2.236557895 |
| Fe144 | 4.900440579  | -2.053755038  | -1.446464804 |
| Fe145 | 2.297659995  | -2.219164743  | -1.374222361 |
| H146  | -6.248474405 | -7.468614879  | 0.394942982  |
| H147  | -6.429503352 | -6.486981881  | -0.897036966 |
| H148  | -9.719393122 | -4.846382613  | 1.357258859  |
| H149  | -8.763668490 | -6.157225218  | -0.413972633 |
| H150  | -8.597017946 | -7.261863706  | 0.946595794  |
| H151  | -8.002431909 | -2.723491862  | 2.085350499  |
| H152  | -8.771255231 | -5.637971757  | 3.967673972  |
| H153  | -9.627134106 | -3.018504902  | 2.742193483  |
| H154  | -8.019097762 | -6.308057052  | 6.063283869  |
| H155  | -6.122911359 | -5.859189938  | 3.673031892  |
| H156  | -7.829378011 | -4.602906411  | 6.524917157  |
| H157  | -2.914818586 | -1.843781726  | 3.320361553  |
| H158  | -5.092692474 | -3.706196827  | 3.162982966  |
| H159  | -3.851506309 | -6.236912556  | 3.342335093  |
| H160  | -4.810389004 | -0.179200771  | 7.298917711  |
| H161  | -5.713252258 | -2.337575235  | 5.601705041  |
| H162  | -3.581795793 | -6.344092582  | 5.099372963  |
| H163  | -4.636645140 | -1.461106527  | 3.102841333  |
| H164  | -4.273509972 | -3.745607026  | 7.552470061  |
| H165  | -5.947341683 | -1.478566369  | 7.755211930  |
| H166  | -0.437191361 | -3.172344358  | 3.696889168  |
| H167  | -0.718127325 | -2.101529322  | 2.312910277  |
| H168  | 0.940800558  | -2.389797604  | 2.873728323  |
| H169  | -1.265564396 | -1.013031998  | 4.511380465  |
| H170  | -3.328751380 | -4.865605168  | 9.353071395  |
| H171  | -1.951110102 | 2.093002639   | 5.369100860  |
| H172  | -1.477001685 | -0.249876030  | 9.187006258  |
| H173  | -1.778862854 | 3.211560770   | 9.580846981  |
| H174  | 1.121478454  | 0.373537929   | 3.181579858  |
| H175  | -0.135377470 | 1.128347742   | 4.205819230  |
| H176  | 9.305624350  | 2.007362043   | 4.453782953  |
| H177  | -2.888958451 | 3.447112156   | 6.017839219  |
| H178  | -2.767974427 | 4.096276539   | 8.395273843  |
| H179  | -1.124666167 | 3.605105697   | 5.835686645  |
| H180  | -0.994680773 | 4.261700188   | 8.376453386  |
| H181  | -2.557814443 | 1.681138731   | 7.766187480  |
| H182  | 0.415771047  | 2.292232725   | 7.343226127  |
| H183  | -1.280546158 | 0.100921242   | 6.441440703  |
| H184  | -0.553389586 | 0.452083266   | 2.622560420  |
| H185  | 1.585290893  | 4.223963840   | 0.212566019  |
| H186  | 0.754213299  | 4.483376050   | 1.770894561  |
| H187  | 2.681687925  | 5.306235273   | 2.300138356  |
| H188  | 3.230107269  | 4.670892227   | 4.819463542  |
| H189  | 4.804843374  | 4.213093475   | 1.682007243  |
| H190  | 6.631574502  | 2.570588025   | 1.335402027  |
| H191  | 6.496547207  | 1.539878876   | 5.523828479  |

|      |               |              |               |
|------|---------------|--------------|---------------|
| H192 | -0.729848504  | -2.496650832 | 6.444810488   |
| H193 | 0.267418619   | -5.549737479 | 6.425402013   |
| H194 | 0.864361036   | -4.943443892 | 7.984714580   |
| H195 | -1.825693536  | -4.425243264 | 6.815437984   |
| H196 | -2.882896332  | -3.311261994 | 10.099877027  |
| H197 | 4.631572334   | 3.144679364  | 5.857903816   |
| H198 | 1.692875326   | -1.473048097 | 5.067014459   |
| H199 | -0.799782522  | 0.623343604  | 11.753280463  |
| H200 | -0.991141702  | -1.079413610 | 11.260053508  |
| H201 | 1.615792477   | -0.745851697 | 10.439173237  |
| H202 | 11.175565350  | -7.018592031 | 4.001663585   |
| H203 | -1.723229660  | -5.971962458 | -4.115940875  |
| H204 | 1.274744435   | -6.014954054 | -1.770948370  |
| H205 | -2.278282539  | -6.238117054 | -8.480030826  |
| H206 | -0.795426086  | -5.364804837 | -8.947498594  |
| H207 | -3.106570505  | -4.351014875 | -7.192822891  |
| H208 | -3.022934274  | 1.054432138  | -9.740037923  |
| H209 | -3.331549753  | -4.248104586 | -9.719272274  |
| H210 | -3.340125167  | -2.179137941 | -2.310289352  |
| H211 | -3.940144399  | -4.956192655 | -1.166407982  |
| H212 | -2.247662279  | -1.029928974 | -8.458988869  |
| H213 | -5.091067835  | -0.311309006 | -8.756310726  |
| H214 | -1.020222998  | -2.416084853 | -9.607386472  |
| H215 | -1.284925597  | -5.808610455 | -2.417856332  |
| H216 | -1.588382125  | -3.462948848 | -7.333310697  |
| H217 | -1.183823399  | -3.804095991 | -10.478355857 |
| H218 | -6.734128573  | -3.442675274 | -2.889680893  |
| H219 | -3.470095866  | -2.396315112 | -0.554290807  |
| H220 | 0.821225361   | -5.296422672 | -7.561541647  |
| H221 | -2.310139665  | -4.314645940 | -1.041019344  |
| H222 | -3.836067567  | 2.587283793  | 3.072164416   |
| H223 | -2.903213990  | 0.534465251  | 1.389634847   |
| H224 | -8.115871944  | 0.759015668  | 3.770109067   |
| H225 | -7.255200070  | -0.065444206 | 1.030232924   |
| H226 | -6.928521506  | 4.079535718  | 2.401487701   |
| H227 | -8.336222683  | 8.749715520  | 4.461793928   |
| H228 | -6.842823588  | 5.262176262  | 5.343163867   |
| H229 | -8.903306654  | 5.464628762  | 3.502091471   |
| H230 | -6.243798526  | 6.836175620  | 2.764059233   |
| H231 | -10.788674478 | 9.553867797  | 1.104315878   |
| H232 | -3.235897168  | 4.223906476  | 1.285373677   |
| H233 | -4.786342315  | 3.954165278  | 0.477363700   |
| H234 | -9.804320035  | 10.467746917 | 3.277397247   |
| H235 | -8.375705997  | 5.640227320  | 1.826664512   |
| H236 | -6.184141033  | 2.039178093  | 1.362670496   |
| H237 | -7.018619464  | -0.586922965 | 3.461362224   |
| H238 | -9.837724355  | 1.966868770  | -0.241066910  |
| H239 | -2.191231336  | 1.472281490  | -2.693418853  |
| H240 | -10.209307193 | 0.233384735  | -0.182290902  |
| H241 | 10.291425449  | 3.267009564  | 2.67932215    |
| H242 | 8.684239048   | 3.348053393  | 2.396341077   |
| H243 | 1.550276461   | 5.950822393  | -1.453221920  |
| H244 | -0.705139174  | 5.450480258  | 0.254480051   |
| H245 | 1.720977232   | 8.045724080  | 0.306156090   |
| H246 | -3.464997802  | 3.488976318  | -1.623895044  |
| H247 | -5.112922824  | 4.164785213  | -2.801641305  |
| H248 | -6.685975822  | 3.397995680  | -4.215496537  |
| H249 | -4.787073653  | 5.398574504  | -1.847402377  |
| H250 | -5.520303988  | 1.256993951  | -4.109426420  |
| H251 | -7.301830004  | 1.281704766  | -3.911044186  |
| H252 | -0.027481981  | 11.599592975 | -1.838831395  |
| H253 | -1.186260933  | 12.931200030 | -1.667901975  |
| H254 | -0.904706670  | 10.221676042 | -3.349103147  |
| H255 | -2.592866147  | 9.714305972  | -3.344234534  |
| H256 | -3.767961810  | 9.148140384  | -6.081602451  |
| H257 | -2.649194106  | 4.849021057  | -5.756831683  |
| H258 | -7.255928378  | 8.689968736  | -0.572032420  |
| H259 | -3.100354808  | 8.545916688  | 2.154628131   |
| H260 | -4.652543752  | 7.787577050  | -2.948135979  |
| H261 | 1.072593065   | 5.383080962  | -3.909244813  |
| H262 | 2.342884527   | 7.204373237  | -3.241371603  |
| H263 | -1.380241937  | 4.865030980  | -3.373780274  |
| H264 | -8.363653471  | -0.190965557 | -1.511144590  |
| H265 | 3.640829886   | 10.009856898 | -4.158472325  |
| H266 | -6.080481894  | -0.947007209 | -3.100049887  |
| H267 | 0.538001319   | 6.370677672  | -5.264991299  |
| H268 | -3.391076091  | 6.961470666  | 0.293338277   |
| H269 | 3.339630393   | 10.310186299 | -2.433351029  |
| H270 | -3.061461394  | 7.703226509  | -6.712596715  |
| H271 | -5.110209365  | 8.932199549  | -4.166608057  |

|      |              |               |               |
|------|--------------|---------------|---------------|
| H272 | -5.163615413 | -3.525129872  | -3.456687311  |
| H273 | -5.760040350 | -3.324599995  | -0.818297459  |
| H274 | -6.909095216 | 10.360923021  | 1.224997669   |
| H275 | -5.239658925 | 1.392919510   | -1.641175777  |
| H276 | -0.490797953 | 8.020328663   | -3.705508127  |
| H277 | -1.742044429 | 6.345205435   | -6.008464523  |
| H278 | -0.665180960 | 4.207846512   | -4.837867672  |
| H279 | -3.582495572 | 5.871225152   | -3.668638187  |
| H280 | 0.783860332  | 8.877320015   | 2.941500767   |
| H281 | -0.458630576 | 9.753029188   | 0.103512502   |
| H282 | -0.067962474 | 12.614852193  | 0.412346909   |
| H283 | 2.260123333  | 9.396372562   | 2.091700302   |
| H284 | -2.440041472 | 10.642406640  | 1.731868011   |
| H285 | 4.594035739  | -3.043264848  | -9.169150118  |
| H286 | 4.574051062  | -4.486819561  | -8.137086751  |
| H287 | 7.909975674  | -5.258884904  | -5.189974491  |
| H288 | 5.036548017  | -5.136621454  | -10.392016244 |
| H289 | 3.499937643  | -5.616754102  | -10.093914869 |
| H290 | 5.509763780  | 4.788637143   | -0.937289845  |
| H291 | 5.759069396  | 7.448510980   | 0.500660681   |
| H292 | 4.822858439  | 8.092715652   | -3.611437548  |
| H293 | 4.133313953  | 5.623101767   | -0.15071283   |
| H294 | 6.832031397  | 8.049099648   | -0.579673332  |
| H295 | 5.428114989  | 2.738976483   | -6.882395280  |
| H296 | 5.963956729  | 6.748556128   | -2.341062791  |
| H297 | 5.355695968  | -7.047475897  | 4.999028325   |
| H298 | 7.086552511  | -7.921153988  | 2.620975592   |
| H299 | 3.627571420  | 1.343610121   | -6.854069281  |
| H300 | 5.086941061  | -0.114959638  | 3.174526027   |
| H301 | 0.546835698  | 1.547135732   | -8.684003935  |
| H302 | -1.120060317 | -2.110113273  | -4.390030914  |
| H303 | 0.449773191  | 2.080225505   | -7.002442147  |
| H304 | 4.348094340  | -4.510985867  | 4.536545704   |
| H305 | 2.079504455  | 0.041860028   | -6.576526983  |
| H306 | 3.975239924  | -5.105780369  | 2.910627660   |
| H307 | 4.811438443  | -7.331972607  | 3.328607463   |
| H308 | 6.461584769  | -5.524718583  | 2.569124045   |
| H309 | 6.729673548  | -5.110421613  | 4.269031166   |
| H310 | -5.197839410 | -0.798984651  | -6.456730814  |
| H311 | 5.949457290  | -9.513111805  | 4.882158959   |
| H312 | 4.985632146  | -11.797075640 | 3.073881935   |
| H313 | 0.208795034  | -0.016089662  | -4.193366901  |
| H314 | 6.263930482  | -11.893569715 | 5.694743613   |
| H315 | 4.701699754  | -12.164371854 | 5.285137015   |
| H316 | 5.587052895  | -3.386622056  | 2.049490077   |
| H317 | -0.761381086 | 2.144540885   | -4.915189525  |
| H318 | -3.365108604 | -2.056330970  | -5.459323588  |
| H319 | 7.666006751  | -9.928734237  | -1.686166746  |
| H320 | 6.619102211  | -7.647797746  | -3.761471336  |
| H321 | 6.661444960  | -8.159955839  | -0.121327978  |
| H322 | 6.794329121  | -10.531381293 | -2.822989501  |
| H323 | 4.875394644  | 2.579956890   | -9.593682750  |
| H324 | 6.400043217  | -5.041663236  | -0.244993714  |
| H325 | 2.337651365  | -7.730261249  | 0.858005058   |
| H326 | 3.267297362  | -2.005899950  | -7.662013356  |
| H327 | 3.070571534  | -9.184642500  | -0.828713847  |
| H328 | 3.049720849  | -6.936909925  | -7.004390659  |
| H329 | 2.240511840  | -5.469825024  | -5.100734015  |
| H330 | 6.581013537  | -12.456722736 | 3.449556401   |
| H331 | 5.743885893  | -1.098765637  | 1.890095995   |
| H332 | 8.367945716  | -5.793463020  | 0.805528320   |
| H333 | 7.266679072  | -3.761288911  | -0.111230685  |
| H334 | 8.984727667  | -6.866753694  | 2.792356744   |
| H335 | 3.655619140  | -2.716103747  | 5.080347549   |
| H336 | 3.776996241  | -8.282894110  | -3.671323794  |
| H337 | 4.989796192  | -8.584676168  | -2.423015482  |
| H338 | 1.930643193  | -8.659196311  | -2.078901079  |
| H339 | 1.333369638  | -2.151626776  | -6.167014329  |
| H340 | -3.022213957 | 2.209947330   | -5.995574044  |
| H341 | -5.141199930 | 0.977022637   | -6.613265827  |
| H342 | 2.385492931  | -5.965728325  | 0.643045648   |
| H343 | 8.527498072  | -7.325541377  | 0.578485921   |
| H344 | 7.430939585  | -9.250297834  | 0.653899293   |
| H345 | 4.072501746  | -1.046892115  | 5.001132863   |
| H346 | 5.513543779  | -7.609159862  | -6.727429980  |
| H347 | 6.580106367  | -5.994063536  | -3.176783668  |
| H348 | 0.448244402  | -2.946880669  | -7.501841477  |
| H349 | 4.303602013  | 4.112660577   | -6.999585653  |
| H350 | 7.795578441  | 0.149705452   | 3.908057407   |
| H351 | 7.834810691  | 0.570950275   | 2.179889162   |

|       |              |               |               |
|-------|--------------|---------------|---------------|
| H352  | 8.985224362  | -6.917435427  | -6.470560607  |
| H353  | 8.216643576  | -8.143628057  | -5.704183570  |
| H354  | 10.308422540 | -8.565183715  | -1.682782474  |
| H355  | 8.587091321  | -8.276378539  | -3.145945973  |
| H356  | 11.724172242 | -7.577839872  | -3.835848065  |
| H357  | 10.166125737 | -6.840005901  | -1.292805698  |
| H358  | 10.577264329 | 0.374190554   | 2.166918445   |
| H359  | -2.973907628 | 13.208544466  | 3.716203042   |
| H360  | 10.254415060 | -6.874626405  | 5.520230024   |
| H361  | 9.513932358  | -4.464693843  | 4.396609235   |
| H362  | -4.700044486 | 12.312665933  | 1.401309108   |
| H363  | -4.089373514 | 10.302707534  | 3.656217817   |
| H364  | -5.678044574 | 10.999519338  | 3.290542851   |
| H365  | 1.237099843  | -3.157985468  | -0.844007787  |
| H366  | 3.247819186  | -1.145748815  | 0.787553172   |
| H367  | -6.427177856 | 6.811828406   | -1.571446998  |
| H368  | 0.540377224  | -0.961326928  | 0.489644104   |
| H369  | -1.806100950 | -0.195470894  | -0.838458608  |
| Mo370 | 3.860927226  | -4.380276605  | -2.416672034  |
| N371  | -6.926257917 | -7.156194143  | -0.304476767  |
| N372  | -8.802203541 | -4.652658871  | 1.752184491   |
| N373  | -8.211060605 | -4.964373247  | 4.484566791   |
| N374  | -5.530544764 | -5.817999120  | 4.503607394   |
| N375  | -4.269310056 | -3.416296087  | 3.687539777   |
| N376  | -4.922053823 | -1.805174470  | 5.971810870   |
| N377  | -3.682875600 | -3.187121406  | 8.174791665   |
| N378  | -1.086874396 | -4.378476844  | 7.525090447   |
| N379  | 0.243369315  | -2.446573440  | 6.149100841   |
| N380  | -0.390880125 | 0.451962809   | 6.803895432   |
| N381  | -0.697076004 | 0.207438918   | 9.664465782   |
| N382  | 5.501525499  | -11.556799728 | 5.102584311   |
| N383  | 6.414085684  | -9.301000497  | 3.993026281   |
| N384  | 5.105584673  | -3.345055314  | 2.952164068   |
| N385  | 4.250640514  | -1.989162431  | 4.664726670   |
| N386  | 5.259196500  | -1.043036084  | 2.798771005   |
| N387  | 9.066845915  | -6.989004367  | 3.826097398   |
| N388  | -5.845396894 | -2.940324628  | -2.938374873  |
| N389  | -1.919713329 | -5.578805056  | -3.189131644  |
| N390  | -6.079776361 | -0.437991827  | -2.199923742  |
| N391  | -8.344733988 | 0.679006548   | -0.983213542  |
| N392  | -7.839726388 | 0.355902792   | 1.760486985   |
| N393  | -5.695270415 | 2.093276897   | 2.260922236   |
| N394  | -3.139037075 | 2.630152568   | -1.112979995  |
| N395  | -2.390237395 | 0.645857148   | -0.708362151  |
| N396  | -6.309506645 | 4.728820240   | 2.880833739   |
| N397  | -9.717879155 | 7.749324462   | 1.601632564   |
| N398  | -9.636666810 | 9.529450467   | 2.923735529   |
| N399  | 9.481154582  | 2.705545143   | 2.405954010   |
| N400  | 6.307782193  | 7.205849139   | -0.330398798  |
| N401  | 4.207807769  | 8.456648757   | -2.888241214  |
| N402  | 1.552551508  | 7.847782142   | -3.352051774  |
| N403  | -3.165062731 | 6.398868344   | -4.457020392  |
| N404  | -3.383498004 | 8.225201005   | -5.904676206  |
| N405  | -4.443044847 | 8.237028828   | -3.842959947  |
| N406  | 0.657639889  | 6.313545219   | -1.080047926  |
| N407  | 0.959400064  | 8.199005879   | 0.973120820   |
| N408  | -0.364748682 | 10.600038291  | 0.663662555   |
| N409  | -1.877772540 | 10.380039628  | -3.057825290  |
| N410  | -2.742634582 | 11.613167573  | 1.710444842   |
| N411  | 4.087821574  | -4.789850152  | -10.232796989 |
| N412  | 2.451110229  | -2.577693942  | -7.892456052  |
| N413  | 1.397052095  | 0.225543317   | -7.330404984  |
| N414  | 3.494873688  | 2.193036897   | -7.410002685  |
| N415  | -1.701792680 | -3.012938194  | -10.090700330 |
| N416  | -3.260340553 | -1.178028400  | -8.510433130  |
| N417  | 8.109275116  | -7.169628744  | -6.004100486  |
| N418  | 4.255337578  | -5.675679342  | -4.351862281  |
| N419  | 3.648448019  | -6.619492248  | -6.246873223  |
| N420  | 9.243435830  | -7.491209700  | -3.100666480  |
| N421  | 0.042211590  | 2.366221822   | -0.336118172  |
| N422  | 2.331728854  | -1.276168670  | 0.330331700   |
| N423  | 0.806801400  | 1.728804302   | -0.866126189  |
| N424  | 1.414651542  | -0.839640811  | 1.057559959   |
| O425  | -6.568516531 | -5.085260326  | 1.675178260   |
| O426  | -7.344362699 | -2.854267325  | 4.520025703   |
| O427  | -5.391896783 | -5.249983390  | 6.711618114   |
| O428  | -2.493751849 | -4.059710413  | 4.958461452   |
| O429  | -3.051644375 | -0.605167110  | 5.511023622   |
| O430  | -3.274417810 | -1.112674090  | 9.051102774   |
| O431  | -0.551997150 | -4.124476887  | 9.741127529   |

|      |              |               |              |
|------|--------------|---------------|--------------|
| O432 | 2.181855620  | -3.686175003  | 6.015427281  |
| O433 | 1.891559151  | 0.391922379   | 6.656021026  |
| O434 | 0.796374543  | 1.915320793   | 9.763642631  |
| O435 | 1.515835960  | -0.339003427  | 12.435907696 |
| O436 | 7.061463660  | -10.343464435 | 2.033484876  |
| O437 | 8.079343174  | -7.751452350  | 5.758316693  |
| O438 | 11.545853677 | -4.495497781  | 4.564352150  |
| O439 | -5.629196479 | -0.831806516  | 0.014163368  |
| O440 | -3.692864088 | -4.418243967  | -4.015551179 |
| O441 | -7.105095474 | 2.515746761   | -0.431653337 |
| O442 | -6.329139018 | 3.051657806   | -3.378180338 |
| O443 | -9.756222634 | 1.514495745   | 2.264007236  |
| O444 | -5.591243611 | 1.418265637   | 4.442804202  |
| O445 | -4.219604932 | 5.046410508   | 3.746403887  |
| O446 | -6.512324022 | 7.276763240   | 5.334154621  |
| O447 | 10.817730498 | -0.034848879  | 4.153366330  |
| O448 | 3.579948955  | 4.691362104   | 3.909685085  |
| O449 | 3.611511020  | 8.383452339   | -0.688643757 |
| O450 | 0.987381976  | 10.070750970  | -3.544636290 |
| O451 | -1.405567330 | 7.184344216   | -1.537592331 |
| O452 | -0.704094232 | 7.139235932   | 2.147453510  |
| O453 | 2.432997474  | 5.682649939   | 1.431218742  |
| O454 | 0.849957466  | 11.575910014  | 2.343435248  |
| O455 | -2.489162566 | 13.585681211  | 0.594955135  |
| O456 | -3.247291805 | 11.034085954  | -1.348630983 |
| O457 | -4.950810963 | 13.707511008  | 3.616585470  |
| O458 | -5.483443502 | 6.834926499   | -1.320185391 |
| O459 | 1.748134214  | -4.591546466  | -8.744683926 |
| O460 | -0.255718504 | -0.749080738  | -8.584240346 |
| O461 | 2.119591648  | 3.591359853   | -8.557317708 |
| O462 | 5.691669526  | 4.408949830   | -9.198497210 |
| O463 | -4.981502927 | -2.623538203  | -8.890231786 |
| O464 | -1.484801614 | -6.609011384  | -6.007232195 |
| O465 | 0.444251403  | -5.775927321  | -6.760275921 |
| O466 | -3.988962118 | 2.325668858   | -8.473966581 |
| O467 | 9.921137788  | -5.425307728  | -3.740237184 |
| O468 | 12.661887357 | -6.990132623  | -2.120601055 |
| O469 | 0.327004681  | -6.228389742  | -1.291757253 |
| O470 | -0.202817539 | -7.323724137  | 0.598974311  |
| O471 | 5.152625345  | -10.890017092 | -3.325959980 |
| O472 | 2.891345158  | -10.939394437 | -3.298835795 |
| O473 | 5.134643343  | -5.856032063  | -1.384796584 |
| O474 | 5.069324421  | -7.503572331  | 0.137591580  |
| O475 | 2.628981094  | -6.077732831  | -2.068317981 |
| O476 | 8.960056961  | -6.550574771  | 1.034959221  |
| O477 | 6.988130474  | -4.553545608  | 0.386155709  |
| O478 | -4.375760165 | 4.738892267   | -2.458859400 |
| O479 | 7.748858737  | -10.421353959 | -2.532997347 |
| O480 | 7.540684755  | -8.624506011  | -0.106386669 |
| S481 | 3.563062525  | 4.943063617   | -2.413532439 |
| S482 | 2.162972002  | 1.986981150   | -3.483963890 |
| S483 | 1.988229351  | -3.323623104  | -3.390135314 |
| S484 | 3.626955117  | 1.758307962   | -0.258895647 |
| S485 | 0.527947336  | -0.909931217  | -1.869919939 |
| S486 | 4.008763583  | -0.759876692  | -5.541756965 |
| S487 | 3.711457259  | -3.546266553  | -0.240765355 |
| S488 | 5.688271833  | 1.719583493   | -3.180593991 |
| S489 | 5.670086389  | -3.088237299  | -3.250980065 |
| S490 | 6.388340431  | -0.847089720  | -0.354380719 |
| end  |              |               |              |

## N2-ready-a to Fe2-N-NH-a

Figure 8, scheme E

| transition state (S=3/2) | bm52rda2nnhtrk_1_53266.24 |              |              |             |
|--------------------------|---------------------------|--------------|--------------|-------------|
| Fe( 139) -2.227          | C1                        | -7.748113706 | -5.373374575 | 1.284556779 |
| Fe( 140) -0.001          | C2                        | -8.148092803 | -6.514982935 | 0.342272984 |
| Fe( 141) -2.472          | C3                        | -8.545282873 | -3.437010543 | 2.567838341 |
| Fe( 142) 2.446           | C4                        | -7.903738065 | -3.694760806 | 3.927374876 |
| Fe( 143) 2.623           | C5                        | -7.467280893 | -5.281069314 | 5.737644466 |
| Fe( 144) 1.535           | C6                        | -5.942293172 | -5.399694844 | 5.668090656 |
| Fe( 145) 1.187           | C7                        | -3.968774214 | -5.708534098 | 4.273258607 |
|                          | C8                        | -3.451363420 | -4.268109754 | 4.296792333 |
|                          | C9                        | -3.879050953 | -1.950097142 | 3.603812409 |
|                          | C10                       | -3.887659587 | -1.320371731 | 5.006030854 |
|                          | C11                       | -4.913239187 | -1.153202870 | 7.185493026 |
|                          | C12                       | -3.856011473 | -1.706138178 | 8.151931197 |



|     |               |               |              |
|-----|---------------|---------------|--------------|
| C13 | -2.853761301  | -3.722397122  | 9.130480798  |
| C14 | -1.387211880  | -4.042389469  | 8.806740253  |
| C15 | 0.234804237   | -4.809875531  | 7.121079742  |
| C16 | 0.971467935   | -3.659904663  | 6.426461051  |
| C17 | 0.645792885   | -1.425539903  | 5.398831400  |
| C18 | 0.767954788   | -0.208190670  | 6.329220032  |
| C19 | -0.216952931  | -1.209372833  | 4.129616394  |
| C20 | 0.032066805   | 0.143527914   | 3.441026709  |
| C21 | -0.034808156  | -2.370748302  | 3.141849803  |
| C22 | -0.361073496  | 1.546431927   | 7.617262535  |
| C23 | 0.007784084   | 1.224792484   | 9.077959056  |
| C24 | -1.687618983  | 2.331203067   | 7.482346052  |
| C25 | -1.750814760  | 3.498873805   | 8.472636253  |
| C26 | -1.866004284  | 2.840917046   | 6.045323553  |
| C27 | -0.405789069  | -0.086073227  | 11.077215087 |
| C28 | 1.060220949   | -0.354254637  | 11.355142086 |
| C29 | 5.900926515   | -11.602181719 | 3.759760337  |
| C30 | 6.516207737   | -10.324143280 | 3.198805013  |
| C31 | 6.784545530   | -7.895877117  | 3.682417546  |
| C32 | 8.006100451   | -7.500499998  | 4.532247498  |
| C33 | 5.604870009   | -6.940035471  | 3.922365103  |
| C34 | 5.937028219   | -5.498138040  | 3.549780547  |
| C35 | 4.692096513   | -4.616122892  | 3.500584044  |
| C36 | 4.903070546   | -2.116713628  | 3.531248065  |
| C37 | 10.266818215  | -6.557113942  | 4.484524643  |
| C38 | 10.492548013  | -5.062229198  | 4.471766575  |
| C39 | -5.345762281  | -2.681194813  | -1.559460765 |
| C40 | -5.705312805  | -1.246537194  | -1.125522046 |
| C41 | -3.806945314  | -2.824937148  | -1.500120846 |
| C42 | -3.252934718  | -4.259698205  | -1.618864082 |
| C43 | -2.983759070  | -4.744033193  | -3.044447691 |
| C44 | -6.186778883  | 0.994926365   | -2.031683783 |
| C45 | -7.275531382  | 1.452152800   | -1.050613772 |
| C46 | -6.363440937  | 1.603981297   | -3.428331763 |
| C47 | -9.429451966  | 0.930879415   | -0.003151876 |
| C48 | -9.031542845  | 0.951097523   | 1.475891188  |
| C49 | -7.326053018  | 0.439205967   | 3.158478876  |
| C50 | -6.155421937  | 1.400932463   | 3.369601630  |
| C51 | -4.608195214  | 3.047501712   | 2.435175396  |
| C52 | -5.049344410  | 4.357209673   | 3.132077403  |
| C53 | -4.024028164  | 3.479161952   | 1.081375960  |
| C54 | -3.408858339  | 2.415634278   | 0.234514528  |
| C55 | -2.971688160  | 1.137093602   | 0.472595007  |
| C56 | -2.557996614  | 1.602998770   | -1.667077863 |
| C57 | -6.855759197  | 6.036041774   | 3.245731537  |
| C58 | -6.761033097  | 6.190807305   | 4.762132894  |
| C59 | -8.327202859  | 6.089731536   | 2.775236817  |
| C60 | -8.949053674  | 7.450455787   | 2.659930223  |
| C61 | -8.873686955  | 8.554297794   | 3.486935071  |
| C62 | -10.200275207 | 8.971538235   | 1.761718804  |
| C63 | 9.232936426   | 1.625039517   | 3.424290197  |
| C64 | 10.264123548  | 0.523700882   | 3.257365897  |
| C65 | 7.838807067   | 0.981457844   | 3.246000868  |
| C66 | 6.708470552   | 1.960039912   | 3.462644273  |
| C67 | 6.138681282   | 2.156261870   | 4.732982550  |
| C68 | 6.193983868   | 2.708689566   | 2.389047907  |
| C69 | 5.088905429   | 3.062022115   | 4.928247799  |
| C70 | 5.162462827   | 3.629652337   | 2.571019878  |
| C71 | 4.602240841   | 3.797166902   | 3.839591301  |
| C72 | 5.364034248   | 6.852248331   | -1.395485000 |
| C73 | 4.310935052   | 7.953365438   | -1.605155521 |
| C74 | 4.690584974   | 5.512946064   | -1.097447166 |
| C75 | 3.308107369   | 9.541916399   | -3.207590594 |
| C76 | 1.833143805   | 9.164056613   | -3.367887511 |
| C77 | 0.214160403   | 7.267265732   | -3.327011116 |
| C78 | -0.250295148  | 6.925445798   | -1.887314987 |
| C79 | 0.243836564   | 6.022296588   | -4.241526230 |
| C80 | -1.010562244  | 5.146839634   | -4.348310543 |
| C81 | -2.154149563  | 5.684169878   | -5.225590961 |
| C82 | -3.675058440  | 7.605063275   | -4.743264316 |
| C83 | 0.274416673   | 5.982160924   | 0.310350161  |
| C84 | 0.117534325   | 7.203648339   | 1.227825189  |
| C85 | 1.275173315   | 5.018899500   | 0.982337731  |
| C86 | 1.201536673   | 9.267912125   | 1.968951660  |
| C87 | 0.557348339   | 10.610590715  | 1.659433819  |
| C88 | -0.854520586  | 11.872876241  | 0.127867311  |
| C89 | -2.128175376  | 12.428379028  | 0.810926763  |
| C90 | -1.015920531  | 11.880166005  | -1.394568028 |
| C91 | -2.160184770  | 11.009907351  | -1.898043911 |
| C92 | -4.072683567  | 11.949758916  | 2.224144996  |

|       |              |               |              |
|-------|--------------|---------------|--------------|
| C93   | -3.984394931 | 13.050799495  | 3.272282967  |
| C94   | -4.729922854 | 10.681590227  | 2.837498193  |
| C95   | -4.971954485 | 9.608030435   | 1.800955391  |
| C96   | -6.155071795 | 9.603982797   | 1.046320035  |
| C97   | -4.006417694 | 8.627006774   | 1.522100815  |
| C98   | -6.361645089 | 8.668100715   | 0.031429589  |
| C99   | -4.183523103 | 7.698248797   | 0.491784395  |
| C100  | -5.361519236 | 7.736340768   | -0.248417996 |
| C101  | 4.088678571  | -3.980531108  | -8.998051976 |
| C102  | 2.662701545  | -3.726897265  | -8.542935599 |
| C103  | 1.209769988  | -2.192452560  | -7.237829890 |
| C104  | 0.709759686  | -0.836727257  | -7.749128674 |
| C105  | 1.125746026  | 1.585919760   | -7.705830533 |
| C106  | 2.299543465  | 2.541707280   | -7.906206008 |
| C107  | 4.578928133  | 3.212040628   | -7.392556538 |
| C108  | 5.172242706  | 3.371961863   | -8.778906684 |
| C109  | -2.769889107 | -3.494637701  | -9.156025339 |
| C110  | -3.797679590 | -2.405918693  | -8.822167452 |
| C111  | -2.278486434 | -4.170794320  | -7.855390087 |
| C112  | -1.541549787 | -5.489182421  | -8.153998914 |
| C113  | -0.864083380 | -6.015259866  | -6.908668764 |
| C114  | -4.200898957 | -0.086251704  | -8.161199955 |
| C115  | -3.721882111 | 1.198099764   | -8.808953672 |
| C116  | -4.565980485 | 0.045807801   | -6.661029593 |
| C117  | -3.325841193 | 0.059682907   | -5.811860065 |
| C118  | -2.600310065 | 1.247449642   | -5.614009341 |
| C119  | -2.787050923 | -1.150854914  | -5.345478677 |
| C120  | -1.322735794 | 1.203796033   | -5.045378524 |
| C121  | -1.511015460 | -1.193964535  | -4.777223476 |
| C122  | -0.761664350 | -0.018688587  | -4.663676184 |
| C123  | 7.918825290  | -6.236506029  | -4.772870038 |
| C124  | 9.098054641  | -6.321158066  | -3.792611320 |
| C125  | 6.605335096  | -6.610028392  | -4.072744856 |
| C126  | 5.355909240  | -6.407673228  | -4.864794524 |
| C127  | 5.006497530  | -7.001883032  | -6.060316982 |
| C128  | 3.267271707  | -5.891674175  | -5.259676231 |
| C129  | 10.305787675 | -7.546362020  | -2.089077834 |
| C130  | 11.657113875 | -7.319099482  | -2.730587841 |
| C131  | 0.604745271  | -6.925316311  | -0.201839429 |
| C132  | 2.094769932  | -6.9682211760 | 0.112442604  |
| C133  | 3.013860013  | -7.100382965  | -1.139814030 |
| C134  | 2.924860075  | -8.542886140  | -1.700935318 |
| C135  | 3.957463076  | -8.882699646  | -2.777518264 |
| C136  | 3.982126109  | -10.372369469 | -3.181421442 |
| C137  | 4.467972141  | -6.828016963  | -0.715319908 |
| C138  | 3.573408897  | -0.704129998  | -2.226693781 |
| Fe139 | 3.844256703  | -2.001955776  | -3.707068886 |
| Fe140 | 2.155037359  | 0.694361762   | -1.322490833 |
| Fe141 | 5.012336852  | 0.457671598   | -1.509684973 |
| Fe142 | 3.772341332  | 0.506877925   | -3.766072730 |
| Fe143 | 3.906521758  | 2.726579132   | -2.335425123 |
| Fe144 | 4.665532363  | -2.064332496  | -1.259247359 |
| Fe145 | 2.153995207  | -2.423139708  | -1.768853778 |
| H146  | -6.379898040 | -7.533186368  | 0.336947208  |
| H147  | -6.560321665 | -6.539042769  | -0.944413065 |
| H148  | -9.716546309 | -4.781062360  | 1.394959280  |
| H149  | -8.863704626 | -6.123623882  | -0.398681471 |
| H150  | -8.708198586 | -7.247033522  | 0.949207691  |
| H151  | -7.883463975 | -2.734653401  | 2.040024242  |
| H152  | -8.655193291 | -5.598616215  | 3.971448838  |
| H153  | -9.506751213 | -2.932738441  | 2.731916897  |
| H154  | -7.884379204 | -6.240586980  | 6.069666493  |
| H155  | -6.010299155 | -5.839019345  | 3.653843059  |
| H156  | -7.686417755 | -4.528382059  | 6.506039964  |
| H157  | -2.883799505 | -1.764188000  | 3.178752900  |
| H158  | -4.983409331 | -3.697904254  | 3.045827518  |
| H159  | -3.727701725 | -6.175445641  | 3.308973652  |
| H160  | -4.761624388 | -0.067102560  | 7.134839659  |
| H161  | -5.645341582 | -2.283294477  | 5.498866058  |
| H162  | -3.448233292 | -6.257935014  | 5.066197592  |
| H163  | -4.619719877 | -1.443683167  | 2.968714419  |
| H164  | -4.206089350 | -3.619904557  | 7.474495074  |
| H165  | -5.906571057 | -1.350121558  | 7.612966299  |
| H166  | -0.315011718 | -3.333920296  | 3.590533683  |
| H167  | -0.676084421 | -2.222618675  | 2.257524373  |
| H168  | 1.003726499  | -2.430916185  | 2.782616615  |
| H169  | -1.259972184 | -1.210639496  | 4.471527845  |
| H170  | -3.353902143 | -4.669430771  | 9.382547942  |
| H171  | -1.869776618 | 2.023743506   | 5.311919126  |
| H172  | -1.449619452 | -0.256189025  | 9.219951699  |

|      |               |              |               |
|------|---------------|--------------|---------------|
| H173 | -1.704672735  | 3.165110981  | 9.519018224   |
| H174 | 0.811971071   | 0.071728926  | 2.671361705   |
| H175 | 0.315697368   | 0.939961019  | 4.143723529   |
| H176 | 9.307404652   | 1.984270143  | 4.468926842   |
| H177 | -2.820961339  | 3.376942896  | 5.946311306   |
| H178 | -2.692331258  | 4.049916098  | 8.332736245   |
| H179 | -1.054744255  | 3.540828651  | 5.784804237   |
| H180 | -0.917806473  | 4.199582105  | 8.303080464   |
| H181 | -2.513037501  | 1.633516720  | 7.713552109   |
| H182 | 0.467404322   | 2.179509110  | 7.264297746   |
| H183 | -1.286676232  | 0.033142770  | 6.401557273   |
| H184 | -0.893627102  | 0.479609007  | 2.946618035   |
| H185 | 1.577390191   | 4.254210824  | 0.252483253   |
| H186 | 0.739017677   | 4.523175437  | 1.804914361   |
| H187 | 2.675154815   | 5.327716874  | 2.335194189   |
| H188 | 3.212325559   | 4.680934506  | 4.868960354   |
| H189 | 4.765476613   | 4.192238815  | 1.725937195   |
| H190 | 6.590723493   | 2.549043138  | 1.383702836   |
| H191 | 6.510284367   | 1.583977083  | 5.587728065   |
| H192 | -0.806424725  | -2.692683959 | 6.292045684   |
| H193 | 0.214224608   | -5.659219800 | 6.423335001   |
| H194 | 0.829693854   | -5.105085167 | 7.994648277   |
| H195 | -1.861179854  | -4.546463109 | 6.843857542   |
| H196 | -2.835974627  | -3.091134171 | 10.026857520  |
| H197 | 4.644045679   | 3.187835640  | 5.919400418   |
| H198 | 1.678043680   | -1.634421637 | 5.09407062    |
| H199 | -0.750592092  | 0.721064451  | 11.743374123  |
| H200 | -0.957215693  | -1.003076562 | 11.336092530  |
| H201 | 1.648786584   | -0.728480118 | 10.485369432  |
| H202 | 11.140389962  | -7.057623818 | 4.039748881   |
| H203 | -1.757453993  | -5.979044657 | -4.122890489  |
| H204 | 1.229368397   | -6.070914904 | -1.813723537  |
| H205 | -2.269294067  | -6.242709539 | -8.488751052  |
| H206 | -0.804844323  | -5.340075252 | -8.956423647  |
| H207 | -3.129120012  | -4.378886445 | -7.187817461  |
| H208 | -3.118251719  | 1.045978776  | -9.734768450  |
| H209 | -3.356322056  | -4.239144454 | -9.715972914  |
| H210 | -3.367029133  | -2.194414910 | -2.291496716  |
| H211 | -3.954547769  | -4.977309336 | -1.159928994  |
| H212 | -2.290798463  | -1.028516949 | -8.434802013  |
| H213 | -5.143314341  | -0.320213966 | -8.698211298  |
| H214 | -1.047972895  | -2.406941189 | -9.564253061  |
| H215 | -1.324745494  | -5.847741741 | -2.422203500  |
| H216 | -1.622997953  | -3.467838987 | -7.317607302  |
| H217 | -1.217823353  | -3.769924617 | -10.471863172 |
| H218 | -6.751841120  | -3.464530592 | -2.855229349  |
| H219 | -3.481733982  | -2.417834651 | -0.531025731  |
| H220 | 0.829092483   | -5.290115145 | -7.590678610  |
| H221 | -2.325243969  | -4.335739068 | -1.033441274  |
| H222 | -3.834575773  | 2.607827648  | 3.080535427   |
| H223 | -2.998104368  | 0.529429470  | 1.368051497   |
| H224 | -8.140467430  | 0.780035763  | 3.812408053   |
| H225 | -7.265020899  | -0.073299110 | 1.086095887   |
| H226 | -6.932117004  | 4.084087819  | 2.366136135   |
| H227 | -8.326176222  | 8.743481843  | 4.402798432   |
| H228 | -6.910778954  | 5.235038733  | 5.321318219   |
| H229 | -8.935657049  | 5.431839883  | 3.421111720   |
| H230 | -6.271800315  | 6.840000925  | 2.770534714   |
| H231 | -10.875825969 | 9.520260701  | 1.111298734   |
| H232 | -3.260883158  | 4.245921507  | 1.290502263   |
| H233 | -4.817106214  | 3.970184897  | 0.494923091   |
| H234 | -9.834484156  | 10.450109517 | 3.250504004   |
| H235 | -8.362075428  | 5.648355838  | 1.766572990   |
| H236 | -6.177216130  | 2.016918896  | 1.378835029   |
| H237 | -7.018863535  | -0.551434330 | 3.525574460   |
| H238 | -9.873269501  | 1.914399565  | -0.212097715  |
| H239 | -2.217416605  | 1.503545069  | -2.695194773  |
| H240 | -10.213692462 | 0.175202219  | -0.140194488  |
| H241 | 10.294021648  | 3.207698505  | 2.679069726   |
| H242 | 8.686622730   | 3.313448007  | 2.406899669   |
| H243 | 1.549197823   | 5.971465898  | -1.431876154  |
| H244 | -0.709046339  | 5.491063338  | 0.285217675   |
| H245 | 1.737784801   | 8.069836513  | 0.312178159   |
| H246 | -3.457150837  | 3.535913223  | -1.612645107  |
| H247 | -5.119663597  | 4.162155488  | -2.787400661  |
| H248 | -6.714532231  | 3.389077835  | -4.162477708  |
| H249 | -4.801702451  | 5.411657939  | -1.851402998  |
| H250 | -5.538046441  | 1.246816731  | -4.066041189  |
| H251 | -7.318653603  | 1.273611294  | -3.864344507  |
| H252 | -0.062507010  | 11.610680633 | -1.869891855  |

|      |              |               |               |
|------|--------------|---------------|---------------|
| H253 | -1.251699230 | 12.915552594  | -1.686301746  |
| H254 | -0.911678336 | 10.168666427  | -3.320554726  |
| H255 | -2.585652668 | 9.613983849   | -3.288125736  |
| H256 | -3.680201630 | 9.207941379   | -6.025651934  |
| H257 | -2.649225928 | 4.851849111   | -5.748583661  |
| H258 | -7.294605738 | 8.668247989   | -0.538342111  |
| H259 | -3.090496342 | 8.564497714   | 2.115090968   |
| H260 | -4.700922103 | 7.768307906   | -2.962989393  |
| H261 | 1.063837461  | 5.376686709   | -3.888030078  |
| H262 | 2.343658037  | 7.196961598   | -3.238698811  |
| H263 | -1.396283492 | 4.884489280   | -3.350804129  |
| H264 | -8.368432558 | -0.220144518  | -1.473800927  |
| H265 | 3.641832147  | 10.003641150  | -4.146402465  |
| H266 | -6.100215030 | -0.958018103  | -3.058279816  |
| H267 | 0.535920649  | 6.361039079   | -5.249042703  |
| H268 | -3.391960256 | 6.987109231   | 0.251639110   |
| H269 | 3.342338508  | 10.310963476  | -2.422295541  |
| H270 | -2.932319447 | 7.778791091   | -6.661140017  |
| H271 | -5.103898558 | 8.950201305   | -4.163299999  |
| H272 | -5.183299352 | -3.520656196  | -3.433056044  |
| H273 | -5.775484499 | -3.342396168  | -0.784384249  |
| H274 | -6.936152656 | 10.338479589  | 1.255856429   |
| H275 | -5.257621945 | 1.386560212   | -1.594027461  |
| H276 | -0.487504283 | 8.020749349   | -3.698131659  |
| H277 | -1.738234422 | 6.343793929   | -5.997444118  |
| H278 | -0.679581153 | 4.203722552   | -4.804960233  |
| H279 | -3.604356858 | 5.872729649   | -3.677706293  |
| H280 | 0.812581013  | 8.929655258   | 2.941050760   |
| H281 | -0.456196405 | 9.756070357   | 0.102274806   |
| H282 | -0.087069957 | 12.622671703  | 0.374799927   |
| H283 | 2.279872047  | 9.446600020   | 2.074757776   |
| H284 | -2.444527039 | 10.649459417  | 1.731398125   |
| H285 | 4.609199658  | -3.023810244  | -9.150516580  |
| H286 | 4.588583608  | -4.487182435  | -8.145761290  |
| H287 | 7.875776512  | -5.180523344  | -5.078530657  |
| H288 | 5.046371104  | -5.088991637  | -10.416177255 |
| H289 | 3.509942205  | -5.575661254  | -10.125986011 |
| H290 | 5.482719367  | 4.768626291   | -0.946186473  |
| H291 | 5.702405884  | 7.422097570   | 0.535509391   |
| H292 | 4.827829384  | 8.090614677   | -3.592534397  |
| H293 | 4.089528623  | 5.591837140   | -0.181103166  |
| H294 | 6.806924130  | 8.018734562   | -0.513850116  |
| H295 | 5.382398512  | 2.861799784   | -6.726622954  |
| H296 | 5.972218041  | 6.750546555   | -2.307601301  |
| H297 | 5.296177956  | -7.008635195  | 4.978684956   |
| H298 | 7.049921596  | -7.881353577  | 2.617416439   |
| H299 | 3.635660146  | 1.400806932   | -6.775950018  |
| H300 | 5.143589574  | -0.111745185  | 3.250311441   |
| H301 | 0.561160610  | 1.553742275   | -8.645212405  |
| H302 | -1.092110827 | -2.144726368  | -4.439956109  |
| H303 | 0.469219530  | 2.060953474   | -6.956253290  |
| H304 | 4.258569490  | -4.494194928  | 4.500240237   |
| H305 | 2.138081946  | 0.031303785   | -6.585588306  |
| H306 | 3.919717222  | -5.078686774  | 2.865568817   |
| H307 | 4.766530200  | -7.300555426  | 3.304830672   |
| H308 | 6.409858931  | -5.477770740  | 2.556770141   |
| H309 | 6.657451767  | -5.062767837  | 4.260022613   |
| H310 | -5.210307305 | -0.805259541  | -6.396950589  |
| H311 | 5.927345043  | -9.454897812  | 4.901180567   |
| H312 | 4.989438275  | -11.782053269 | 3.169435272   |
| H313 | 0.251536623  | -0.040555683  | -4.267822958  |
| H314 | 6.331373178  | -11.786647043 | 5.764708421   |
| H315 | 4.775375272  | -12.139753026 | 5.396764820   |
| H316 | 5.530828429  | -3.337149332  | 2.046895459   |
| H317 | -0.743857116 | 2.118845224   | -4.909639674  |
| H318 | -3.359283654 | -2.075243454  | -5.448957566  |
| H319 | 7.622029442  | -9.940444455  | -1.665443269  |
| H320 | 6.641937330  | -7.673992757  | -3.781117939  |
| H321 | 6.622172984  | -8.181169853  | -0.100818490  |
| H322 | 6.760178344  | -10.545991259 | -2.811560122  |
| H323 | 4.946100179  | 2.540536051   | -9.489119739  |
| H324 | 6.348167481  | -5.059034191  | -0.221784797  |
| H325 | 2.290120863  | -7.781693387  | 0.821584523   |
| H326 | 3.286732000  | -2.021327566  | -7.603219701  |
| H327 | 3.056044224  | -9.227076533  | -0.848052911  |
| H328 | 3.109403923  | -6.983376910  | -7.055606022  |
| H329 | 2.253730769  | -5.523011147  | -5.175831182  |
| H330 | 6.599183879  | -12.423018505 | 3.523136003   |
| H331 | 5.765187240  | -1.078572616  | 1.966713960   |
| H332 | 8.358196144  | -5.802264234  | 0.795851994   |

|       |              |               |               |
|-------|--------------|---------------|---------------|
| H333  | 7.221546268  | -3.780639187  | -0.134633898  |
| H334  | 8.969433418  | -6.852742056  | 2.797091274   |
| H335  | 3.699472469  | -2.710175093  | 5.134711103   |
| H336  | 3.743348846  | -8.295660905  | -3.683582347  |
| H337  | 4.965542115  | -8.601219784  | -2.444222842  |
| H338  | 1.907840226  | -8.705262271  | -2.090259910  |
| H339  | 1.346254077  | -2.164701821  | -6.144893433  |
| H340  | -3.023274707 | 2.196207343   | -5.952784130  |
| H341  | -5.150122825 | 0.971731329   | -6.550543041  |
| H342  | 2.319888339  | -6.018107820  | 0.625459268   |
| H343  | 8.504806103  | -7.337139984  | 0.584710929   |
| H344  | 7.406027061  | -9.258058794  | 0.679539821   |
| H345  | 4.157954197  | -1.046669690  | 5.106447414   |
| H346  | 5.571480472  | -7.635409093  | -6.732038562  |
| H347  | 6.523893463  | -6.045066874  | -3.136547885  |
| H348  | 0.462128263  | -2.947495876  | -7.487679958  |
| H349  | 4.250636981  | 4.197922584   | -7.029109157  |
| H350  | 7.758074854  | 0.148726749   | 3.959581347   |
| H351  | 7.778604218  | 0.558572004   | 2.230691514   |
| H352  | 9.005728776  | -6.734476164  | -6.440297798  |
| H353  | 8.277930771  | -8.022864970  | -5.738654622  |
| H354  | 10.304921796 | -8.567603614  | -1.677135437  |
| H355  | 8.553373459  | -8.226950436  | -3.096463361  |
| H356  | 11.697765705 | -7.549140988  | -3.822775514  |
| H357  | 10.171975677 | -6.851010174  | -1.245119137  |
| H358  | 10.540683007 | 0.309015530   | 2.196451656   |
| H359  | -2.975457187 | 13.194117449  | 3.725980606   |
| H360  | 10.200365280 | -6.864786514  | 5.543036022   |
| H361  | 9.567919445  | -4.440418553  | 4.390990883   |
| H362  | -4.709952298 | 12.321203440  | 1.404467173   |
| H363  | -4.088631491 | 10.301047472  | 3.648046117   |
| H364  | -5.680052597 | 10.996506966  | 3.292491503   |
| H365  | 1.092712414  | -3.315656319  | -1.153502309  |
| H366  | 3.951099166  | -1.378724390  | 0.316167323   |
| H367  | -6.458085377 | 6.809023563   | -1.565238044  |
| H368  | 0.081464051  | -1.123312151  | -0.491139073  |
| H369  | -1.989386659 | -0.232342145  | -0.868695375  |
| Mo370 | 3.820275878  | -4.421159633  | -2.437837111  |
| N371  | -7.064708276 | -7.195256646  | -0.343630581  |
| N372  | -8.783265393 | -4.628352509  | 1.769574277   |
| N373  | -8.093575478 | -4.917405500  | 4.476582325   |
| N374  | -5.409872884 | -5.772694184  | 4.477359950   |
| N375  | -4.186147525 | -3.371748011  | 3.588831559   |
| N376  | -4.861810483 | -1.727742124  | 5.852490661   |
| N377  | -3.637050460 | -3.046946967  | 8.103663243   |
| N378  | -1.120791807 | -4.501825159  | 7.549473024   |
| N379  | 0.193601415  | -2.594613494  | 6.129572218   |
| N380  | -0.389534568 | 0.344052525   | 6.782643945   |
| N381  | -0.657210455 | 0.203522086   | 9.676089216   |
| N382  | 5.541959365  | -11.500610742 | 5.180899032   |
| N383  | 6.381349095  | -9.253359306  | 4.004128141   |
| N384  | 5.027284624  | -3.307019520  | 2.937258977   |
| N385  | 4.281977284  | -1.977843451  | 4.719039465   |
| N386  | 5.450469460  | -1.032462307  | 2.947416383   |
| N387  | 9.036263719  | -6.961348596  | 3.833530440   |
| N388  | -5.869427835 | -2.951603201  | -2.903204474  |
| N389  | -1.955272506 | -5.598251556  | -3.191265909  |
| N390  | -6.086137907 | -0.448708043  | -2.158354939  |
| N391  | -8.355650078 | 0.646091891   | -0.939714119  |
| N392  | -7.853555446 | 0.352662555   | 1.809736219   |
| N393  | -5.692844788 | 2.086485504   | 2.278377521   |
| N394  | -3.140810249 | 2.670078745   | -1.104545678  |
| N395  | -2.461445612 | 0.661756210   | -0.720489497  |
| N396  | -6.325878300 | 4.732404189   | 2.862765343   |
| N397  | -9.780830919 | 7.723884878   | 1.585912253   |
| N398  | -9.672728870 | 9.510646549   | 2.897237348   |
| N399  | 9.472981286  | 2.658072438   | 2.414083259   |
| N400  | 6.269313029  | 7.178628088   | -0.283195758  |
| N401  | 4.210520444  | 8.454929322   | -2.871617209  |
| N402  | 1.554972813  | 7.843987980   | -3.343097315  |
| N403  | -3.174727762 | 6.403481216   | -4.456735932  |
| N404  | -3.359178037 | 8.256850573   | -5.876215341  |
| N405  | -4.455543536 | 8.238219512   | -3.837970746  |
| N406  | 0.657033588  | 6.331984062   | -1.059993408  |
| N407  | 0.977071684  | 8.231658919   | 0.978507690   |
| N408  | -0.366129795 | 10.610980123  | 0.650630526   |
| N409  | -1.888868700 | 10.311891555  | -3.035095899  |
| N410  | -2.751292184 | 11.618682139  | 1.703434279   |
| N411  | 4.098009878  | -4.746110746  | -10.247213988 |
| N412  | 2.467591296  | -2.576431619  | -7.865380950  |

|                                   |                      |               |               |
|-----------------------------------|----------------------|---------------|---------------|
| N413                              | 1.433106267          | 0.221018083   | -7.317236273  |
| N414                              | 3.497648574          | 2.241335721   | -7.343976592  |
| N415                              | -1.732661692         | -2.987461942  | -10.063036920 |
| N416                              | -3.302890307         | -1.179831081  | -8.484162591  |
| N417                              | 8.138141962          | -7.039208439  | -5.989730313  |
| N418                              | 4.256214492          | -5.699491620  | -4.385427402  |
| N419                              | 3.691015480          | -6.663360597  | -6.285835285  |
| N420                              | 9.225922084          | -7.456920038  | -3.055081249  |
| N421                              | 0.020825441          | 2.419703167   | -0.249095648  |
| N422                              | 2.230878303          | -0.255351449  | 0.644664483   |
| N423                              | 0.863875279          | 1.787769407   | -0.650996586  |
| N424                              | 3.044625269          | -0.956942900  | 1.090514984   |
| O425                              | -6.572783244         | -5.153343559  | 1.627530903   |
| O426                              | -7.241214778         | -2.801848570  | 4.484119146   |
| O427                              | -5.250341140         | -5.172608915  | 6.674339521   |
| O428                              | -2.440105617         | -3.944360152  | 4.937468464   |
| O429                              | -3.034081054         | -0.481447960  | 5.331923658   |
| O430                              | -3.287032786         | -0.950218712  | 8.958790422   |
| O431                              | -0.522266248         | -3.931288275  | 9.684219471   |
| O432                              | 2.184538126          | -3.752450796  | 6.160361669   |
| O433                              | 1.888494805          | 0.222736549   | 6.645781601   |
| O434                              | 0.872719689          | 1.881534639   | 9.681860435   |
| O435                              | 1.561891126          | -0.235738532  | 12.462440991  |
| O436                              | 7.057362885          | -10.333277801 | 2.074449578   |
| O437                              | 8.007613479          | -7.668034415  | 5.764938054   |
| O438                              | 11.596672896         | -4.548372541  | 4.560149098   |
| O439                              | -5.629565538         | -0.849872973  | 0.053927391   |
| O440                              | -3.697611676         | -4.386353347  | -4.010100467  |
| O441                              | -7.135327170         | 2.497419279   | -0.390709824  |
| O442                              | -6.343171761         | 3.041707341   | -3.331902341  |
| O443                              | -9.786812577         | 1.490930412   | 2.294828923   |
| O444                              | -5.661101583         | 1.527844698   | 4.493386462   |
| O445                              | -4.259657096         | 5.043794109   | 3.785810859   |
| O446                              | -6.587475389         | 7.250986616   | 5.337867758   |
| O447                              | 10.755922880         | -0.102078469  | 4.185335451   |
| O448                              | 3.555165654          | 4.692170492   | 3.956427409   |
| O449                              | 3.597121480          | 8.374163876   | -0.678103568  |
| O450                              | 0.987255594          | 10.066644179  | -3.517891858  |
| O451                              | -1.408017513         | 7.191232158   | -1.528530443  |
| O452                              | -0.696835887         | 7.196979953   | 2.160307356   |
| O453                              | 2.426105256          | 5.712705578   | 1.470077201   |
| O454                              | 0.857324078          | 11.624125885  | 2.301715010   |
| O455                              | -2.505923364         | 13.584918824  | 0.575991312   |
| O456                              | -3.268237655         | 10.990124221  | -1.343188241  |
| O457                              | -4.947564052         | 13.712679057  | 3.623025552   |
| O458                              | -5.511761173         | 6.837762608   | -1.324513589  |
| O459                              | 1.757189750          | -4.566650734  | -8.766591325  |
| O460                              | -0.274251688         | -0.737761038  | -8.510484379  |
| O461                              | 2.113316165          | 3.600657002   | -8.528723110  |
| O462                              | 5.878338455          | 4.313735549   | -9.099571683  |
| O463                              | -5.017504444         | -2.639080221  | -8.840693753  |
| O464                              | -1.465583326         | -6.598721225  | -6.013282277  |
| O465                              | 0.456761377          | -5.773535377  | -6.789562065  |
| O466                              | -3.999791013         | 2.321109146   | -8.411341389  |
| O467                              | 9.938628350          | -5.404998366  | -3.702289702  |
| O468                              | 12.655654826         | -6.979542915  | -2.112400646  |
| O469                              | 0.288492612          | -6.288023461  | -1.337821752  |
| O470                              | -0.255432911         | -7.383709263  | 0.547341766   |
| O471                              | 5.133921725          | -10.909838613 | -3.350850866  |
| O472                              | 2.872499438          | -10.953731812 | -3.345497161  |
| O473                              | 5.073715027          | -5.837639521  | -1.313084970  |
| O474                              | 5.014131282          | -7.546025840  | 0.144628269   |
| O475                              | 2.606147190          | -6.131917961  | -2.108905930  |
| O476                              | 8.946069122          | -6.561536597  | 1.031129289   |
| O477                              | 6.970738858          | -4.572068935  | 0.379087711   |
| O478                              | -4.385955467         | 4.747344032   | -2.455712893  |
| O479                              | 7.711158158          | -10.437357813 | -2.509018945  |
| O480                              | 7.505902971          | -8.638131671  | -0.086785033  |
| S481                              | 3.577055355          | 4.958770343   | -2.471885789  |
| S482                              | 2.070706576          | 1.892968511   | -3.347645899  |
| S483                              | 2.093113962          | -3.397228053  | -3.720426491  |
| S484                              | 3.851223634          | 1.927136004   | -0.290592192  |
| S485                              | 0.501665941          | -0.899239728  | -1.765728333  |
| S486                              | 4.060010560          | -0.766752291  | -5.537091759  |
| S487                              | 3.315598715          | -3.540938389  | -0.296006242  |
| S488                              | 5.643730759          | 1.659149659   | -3.305271532  |
| S489                              | 5.680184391          | -3.058957355  | -2.991281062  |
| S490                              | 6.341024192          | -0.879221918  | -0.386681702  |
| end                               |                      |               |               |
| product <b>Fe2-N-NH-a</b> (S=3/2) | bm52rda2nnhtrk.car_6 |               |               |

|                 |     |               |               |              |
|-----------------|-----|---------------|---------------|--------------|
| Fe( 139) -2.304 | C1  | -7.771779709  | -5.379421248  | 1.305127670  |
| Fe( 140) -0.246 | C2  | -8.125275932  | -6.534562450  | 0.361550957  |
| Fe( 141) -2.498 | C3  | -8.635928848  | -3.472155776  | 2.588637083  |
| Fe( 142) 2.392  | C4  | -7.986043448  | -3.731880749  | 3.945158193  |
| Fe( 143) 3.004  | C5  | -7.560537609  | -5.323535352  | 5.753995518  |
| Fe( 144) 2.037  | C6  | -6.035191857  | -5.437293469  | 5.683092106  |
| Fe( 145) 0.864  | C7  | -4.060084988  | -5.767195622  | 4.288307455  |
|                 | C8  | -3.497160168  | -4.343768992  | 4.315305041  |
|                 | C9  | -3.868420749  | -2.004454672  | 3.684110251  |
|                 | C10 | -3.871134801  | -1.401190964  | 5.096703096  |
|                 | C11 | -4.932517041  | -1.225697982  | 7.258927351  |
|                 | C12 | -3.876949541  | -1.801968557  | 8.213558888  |
|                 | C13 | -2.892482455  | -3.837352519  | 9.163375658  |
|                 | C14 | -1.420322485  | -4.119810672  | 8.834427032  |
|                 | C15 | 0.227069385   | -4.740730194  | 7.110973868  |
|                 | C16 | 0.966713165   | -3.608499380  | 6.396548287  |
|                 | C17 | 0.698825994   | -1.328935039  | 5.454341438  |
|                 | C18 | 0.786811565   | -0.110859073  | 6.389642135  |
|                 | C19 | -0.106666239  | -1.097218630  | 4.150907151  |
|                 | C20 | 0.279536575   | 0.225195247   | 3.477113427  |
|                 | C21 | 0.066236280   | -2.277470765  | 3.186856738  |
|                 | C22 | -0.400701017  | 1.610163040   | 7.670494262  |
|                 | C23 | -0.049975552  | 1.270177185   | 9.130631003  |
|                 | C24 | -1.736837373  | 2.374751400   | 7.521963390  |
|                 | C25 | -1.820285243  | 3.542354559   | 8.510805047  |
|                 | C26 | -1.905783236  | 2.880708854   | 6.082425180  |
|                 | C27 | -0.453656717  | -0.100443141  | 11.087890492 |
|                 | C28 | 1.009396233   | -0.384417325  | 11.365102276 |
|                 | C29 | 5.892977657   | -11.636612005 | 3.715940363  |
|                 | C30 | 6.520435012   | -10.355196835 | 3.178306149  |
|                 | C31 | 6.806715723   | -7.939248124  | 3.693975459  |
|                 | C32 | 8.030945439   | -7.540949256  | 4.538188177  |
|                 | C33 | 5.623222796   | -6.989911241  | 3.939847095  |
|                 | C34 | 5.945394624   | -5.547276464  | 3.562186899  |
|                 | C35 | 4.690156434   | -4.682009107  | 3.488749327  |
|                 | C36 | 4.910433263   | -2.187785237  | 3.553076744  |
|                 | C37 | 10.276282510  | -6.556673476  | 4.471467342  |
|                 | C38 | 10.462596658  | -5.056150761  | 4.469815773  |
|                 | C39 | -5.374771880  | -2.681927923  | -1.581732923 |
|                 | C40 | -5.732966663  | -1.245975707  | -1.152983810 |
|                 | C41 | -3.837026945  | -2.822576134  | -1.513907855 |
|                 | C42 | -3.273577875  | -4.253547206  | -1.632819122 |
|                 | C43 | -3.005995373  | -4.740182480  | -3.057932598 |
|                 | C44 | -6.192078284  | 0.996198977   | -2.064940749 |
|                 | C45 | -7.273840899  | 1.468559984   | -1.083247446 |
|                 | C46 | -6.361238535  | 1.603451899   | -3.463095010 |
|                 | C47 | -9.427707768  | 0.971949875   | -0.025884281 |
|                 | C48 | -9.022272941  | 0.975763457   | 1.451190770  |
|                 | C49 | -7.315335019  | 0.418058478   | 3.119679867  |
|                 | C50 | -6.130942022  | 1.361450548   | 3.335270231  |
|                 | C51 | -4.624408155  | 3.061312288   | 2.425925674  |
|                 | C52 | -5.057077093  | 4.372722427   | 3.124071364  |
|                 | C53 | -4.032592796  | 3.496166356   | 1.076907455  |
|                 | C54 | -3.404532828  | 2.437975369   | 0.232137826  |
|                 | C55 | -2.921436874  | 1.175883363   | 0.474534689  |
|                 | C56 | -2.558905791  | 1.634624978   | -1.674971036 |
|                 | C57 | -6.865745338  | 6.043557895   | 3.276447303  |
|                 | C58 | -6.754629417  | 6.209920164   | 4.790566003  |
|                 | C59 | -8.345061924  | 6.104022364   | 2.827158426  |
|                 | C60 | -8.952225606  | 7.470448230   | 2.696232295  |
|                 | C61 | -8.884549813  | 8.575140139   | 3.523077343  |
|                 | C62 | -10.168303891 | 9.003302661   | 1.768740113  |
|                 | C63 | 9.252788368   | 1.665822550   | 3.376600612  |
|                 | C64 | 10.289949333  | 0.571261995   | 3.204318197  |
|                 | C65 | 7.861081706   | 1.011523552   | 3.205926197  |
|                 | C66 | 6.725788356   | 1.981783540   | 3.430922310  |
|                 | C67 | 6.142021465   | 2.153385567   | 4.698278716  |
|                 | C68 | 6.228111817   | 2.757194535   | 2.367919736  |
|                 | C69 | 5.095075549   | 3.061142173   | 4.900914374  |
|                 | C70 | 5.202578969   | 3.682236569   | 2.558638987  |
|                 | C71 | 4.629555776   | 3.826878728   | 3.824288544  |
|                 | C72 | 5.379113955   | 6.844259089   | -1.440675563 |
|                 | C73 | 4.324616576   | 7.946345317   | -1.639565387 |
|                 | C74 | 4.705747721   | 5.495755610   | -1.202160075 |
|                 | C75 | 3.311905336   | 9.542750823   | -3.227698055 |
|                 | C76 | 1.836523517   | 9.164988425   | -3.386201452 |
|                 | C77 | 0.216856513   | 7.269224281   | -3.344506443 |
|                 | C78 | -0.231473131  | 6.924370606   | -1.900947198 |
|                 | C79 | 0.237808770   | 6.022534097   | -4.258386362 |
|                 | C80 | -1.018325887  | 5.148220729   | -4.358476938 |

|       |              |               |              |
|-------|--------------|---------------|--------------|
| C81   | -2.163302574 | 5.687944886   | -5.232481238 |
| C82   | -3.690874740 | 7.600299398   | -4.752683034 |
| C83   | 0.317470095  | 5.968973696   | 0.286625707  |
| C84   | 0.136260915  | 7.180969313   | 1.212119189  |
| C85   | 1.341523115  | 5.022588593   | 0.949029016  |
| C86   | 1.189863280  | 9.252677819   | 1.977531088  |
| C87   | 0.547478858  | 10.598810587  | 1.677052379  |
| C88   | -0.852062720 | 11.877761989  | 0.144418165  |
| C89   | -2.129035590 | 12.436101789  | 0.817135595  |
| C90   | -0.995074972 | 11.885878239  | -1.380276077 |
| C91   | -2.149023665 | 11.039406381  | -1.903970028 |
| C92   | -4.075640821 | 11.962583715  | 2.228887807  |
| C93   | -3.991616078 | 13.067611802  | 3.273709768  |
| C94   | -4.736183554 | 10.697120019  | 2.842845336  |
| C95   | -4.974660918 | 9.622737226   | 1.806627901  |
| C96   | -6.146892444 | 9.629388417   | 1.035788253  |
| C97   | -4.015361943 | 8.631670778   | 1.543812878  |
| C98   | -6.348643692 | 8.693233934   | 0.020483193  |
| C99   | -4.188590918 | 7.700752095   | 0.514653414  |
| C100  | -5.356003888 | 7.748670398   | -0.241473564 |
| C101  | 4.082438479  | -3.989861553  | -8.977411636 |
| C102  | 2.651824090  | -3.729121358  | -8.540229625 |
| C103  | 1.186872386  | -2.176744609  | -7.270354235 |
| C104  | 0.686685849  | -0.824953397  | -7.792257825 |
| C105  | 1.103645003  | 1.600583935   | -7.749251976 |
| C106  | 2.292283223  | 2.543613458   | -7.925731289 |
| C107  | 4.578548266  | 3.171950609   | -7.397127569 |
| C108  | 5.118305378  | 3.393683432   | -8.796928283 |
| C109  | -2.754974715 | -3.491357107  | -9.178809758 |
| C110  | -3.783170141 | -2.398461287  | -8.859680956 |
| C111  | -2.269133914 | -4.158147605  | -7.872439546 |
| C112  | -1.545535105 | -5.485927796  | -8.163584393 |
| C113  | -0.883139186 | -6.013797769  | -6.911401855 |
| C114  | -4.184683891 | -0.079261419  | -8.196832863 |
| C115  | -3.713777275 | 1.203627691   | -8.852403687 |
| C116  | -4.539151836 | 0.052232163   | -6.694893222 |
| C117  | -3.303889926 | 0.051096881   | -5.837157407 |
| C118  | -2.564191712 | 1.229101450   | -5.631463088 |
| C119  | -2.797181177 | -1.162651378  | -5.344157415 |
| C120  | -1.310886706 | 1.173545052   | -5.011752939 |
| C121  | -1.546139110 | -1.217645354  | -4.722221833 |
| C122  | -0.788926097 | -0.050534208  | -4.583541596 |
| C123  | 7.949569736  | -6.270485881  | -4.799494427 |
| C124  | 9.116183195  | -6.325050778  | -3.801854505 |
| C125  | 6.628511394  | -6.591743822  | -4.084528574 |
| C126  | 5.381046749  | -6.417100201  | -4.886997114 |
| C127  | 5.043757039  | -7.054894612  | -6.062806124 |
| C128  | 3.293540171  | -5.920986669  | -5.318424484 |
| C129  | 10.314961257 | -7.517216012  | -2.070002459 |
| C130  | 11.674284471 | -7.310115721  | -2.702249617 |
| C131  | 0.619986033  | -6.890050501  | -0.260063915 |
| C132  | 2.107898076  | -6.918802257  | 0.070260346  |
| C133  | 3.039683082  | -7.065972848  | -1.172406505 |
| C134  | 2.972601898  | -8.522721044  | -1.700516542 |
| C135  | 4.007819937  | -8.875966017  | -2.769862228 |
| C136  | 4.028895609  | -10.369344490 | -3.160614493 |
| C137  | 4.488204047  | -6.772158667  | -0.743313468 |
| C138  | 3.548178906  | -0.709047747  | -2.209662547 |
| Fe139 | 3.823805369  | -1.971253227  | -3.774846663 |
| Fe140 | 2.097778998  | 0.614668135   | -1.095687773 |
| Fe141 | 4.965779991  | 0.468633962   | -1.483044542 |
| Fe142 | 3.775228632  | 0.519129418   | -3.719211856 |
| Fe143 | 3.870033461  | 2.719117983   | -2.433773797 |
| Fe144 | 4.722688325  | -2.076436387  | -1.407142213 |
| Fe145 | 2.197388291  | -2.356816404  | -1.827507433 |
| H146  | -6.334271836 | -7.512375499  | 0.390332642  |
| H147  | -6.513294788 | -6.522777104  | -0.894672112 |
| H148  | -9.756086931 | -4.837058427  | 1.385073346  |
| H149  | -8.840819034 | -6.170147085  | -0.393217045 |
| H150  | -8.674129493 | -7.278414225  | 0.964358165  |
| H151  | -7.998397431 | -2.739917056  | 2.071957352  |
| H152  | -8.755542930 | -5.629640617  | 3.991313521  |
| H153  | -9.615420634 | -3.004933294  | 2.758419189  |
| H154  | -7.973652463 | -6.287567353  | 6.078190832  |
| H155  | -6.099607246 | -5.869742733  | 3.664975031  |
| H156  | -7.783009295 | -4.579837256  | 6.530330861  |
| H157  | -2.862846255 | -1.849540814  | 3.272367254  |
| H158  | -5.066329208 | -3.698183930  | 3.146972878  |
| H159  | -3.834199831 | -6.233376832  | 3.319863805  |
| H160  | -4.774773009 | -0.139512649  | 7.228250823  |



|      |               |              |               |
|------|---------------|--------------|---------------|
| H161 | -5.671588784  | -2.309495507 | 5.544999090   |
| H162 | -3.553013672  | -6.336809909 | 5.075963082   |
| H163 | -4.584469645  | -1.460035420 | 3.052795110   |
| H164 | -4.272495764  | -3.708712896 | 7.532273495   |
| H165 | -5.927943420  | -1.425106430 | 7.679926158   |
| H166 | -0.247673494  | -3.222876171 | 3.651122356   |
| H167 | -0.554540423  | -2.121934755 | 2.288763427   |
| H168 | 1.111189228   | -2.367687441 | 2.851360679   |
| H169 | -1.166764655  | -1.026704500 | 4.437341208   |
| H170 | -3.371810575  | -4.803894634 | 9.377827818   |
| H171 | -1.904642855  | 2.061669258  | 5.350427901   |
| H172 | -1.479030065  | -0.246360448 | 9.222084939   |
| H173 | -1.786958998  | 3.208560283  | 9.557784000   |
| H174 | 1.315163024   | 0.205695585  | 3.110419982   |
| H175 | 0.157456093   | 1.085788799  | 4.151608278   |
| H176 | 9.330354485   | 2.028490287  | 4.419151641   |
| H177 | -2.859861692  | 3.416571300  | 5.974157817   |
| H178 | -2.762335486  | 4.089188828  | 8.358302858   |
| H179 | -1.092644890  | 3.579771870  | 5.825196079   |
| H180 | -0.987873495  | 4.246587788  | 8.352607494   |
| H181 | -2.557063910  | 1.668185029  | 7.745559595   |
| H182 | 0.421719903   | 2.262383733  | 7.340054722   |
| H183 | -1.276462747  | 0.074717308  | 6.442582806   |
| H184 | -0.372705931  | 0.403029384  | 2.608727721   |
| H185 | 1.661085906   | 4.271690702  | 0.211131094   |
| H186 | 0.818974880   | 4.505533483  | 1.766816339   |
| H187 | 2.718693420   | 5.361897157  | 2.316333159   |
| H188 | 3.232187754   | 4.695890409  | 4.854998496   |
| H189 | 4.820287843   | 4.267099552  | 1.721472301   |
| H190 | 6.631655872   | 2.614084693  | 1.362858086   |
| H191 | 6.500737867   | 1.560061230  | 5.544634506   |
| H192 | -0.754370132  | -2.544169469 | 6.436602522   |
| H193 | 0.212839580   | -5.604249624 | 6.430491013   |
| H194 | 0.817542729   | -5.017330534 | 7.993825407   |
| H195 | -1.863103556  | -4.458128811 | 6.823404216   |
| H196 | -2.890676649  | -3.240734018 | 10.083470759  |
| H197 | 4.640221626   | 3.167663324  | 5.889669358   |
| H198 | 1.740025666   | -1.534701972 | 5.179858938   |
| H199 | -0.794071381  | 0.693764695  | 11.771710862  |
| H200 | -1.014428966  | -1.016979265 | 11.328305805  |
| H201 | 1.600576236   | -0.733563839 | 10.486381960  |
| H202 | 11.155487134  | -7.031169834 | 4.008863983   |
| H203 | -1.764695311  | -5.953774996 | -4.141783730  |
| H204 | 1.263598636   | -6.068068502 | -1.885019419  |
| H205 | -2.281207918  | -6.231133693 | -8.499937344  |
| H206 | -0.802805997  | -5.347119263 | -8.962251814  |
| H207 | -3.122236761  | -4.355378361 | -7.204638559  |
| H208 | -3.131640212  | 1.049417474  | -9.792010727  |
| H209 | -3.343602296  | -4.241630746 | -9.730260923  |
| H210 | -3.392616647  | -2.185469285 | -2.297221397  |
| H211 | -3.966607175  | -4.976799699 | -1.169242452  |
| H212 | -2.274762665  | -1.023025277 | -8.473312085  |
| H213 | -5.130647177  | -0.315248219 | -8.727440591  |
| H214 | -1.035992782  | -2.404404293 | -9.605921049  |
| H215 | -1.316464620  | -5.807126174 | -2.446445380  |
| H216 | -1.607898802  | -3.458700953 | -7.337472350  |
| H217 | -1.201470102  | -3.785417681 | -10.488093153 |
| H218 | -6.782613656  | -3.459627547 | -2.877174775  |
| H219 | -3.519112248  | -2.417580737 | -0.541650488  |
| H220 | 0.818670453   | -5.301267155 | -7.579464848  |
| H221 | -2.343289454  | -4.320238027 | -1.050047540  |
| H222 | -3.855632051  | 2.613458861  | 3.070854205   |
| H223 | -2.904562797  | 0.579837881  | 1.378513609   |
| H224 | -8.120525915  | 0.760095940  | 3.784666072   |
| H225 | -7.270084937  | -0.067199375 | 1.042860675   |
| H226 | -6.963910828  | 4.077242523  | 2.429202655   |
| H227 | -8.356465278  | 8.760389817  | 4.451200626   |
| H228 | -6.901810848  | 5.257794519  | 5.357362688   |
| H229 | -8.950140313  | 5.466147308  | 3.495917152   |
| H230 | -6.283639849  | 6.841267729  | 2.788715844   |
| H231 | -10.820882726 | 9.558868994  | 1.101207578   |
| H232 | -3.276772041  | 4.268089916  | 1.294067063   |
| H233 | -4.823707577  | 3.983414310  | 0.484897450   |
| H234 | -9.821219371  | 10.479808884 | 3.263872820   |
| H235 | -8.402445692  | 5.644975481  | 1.827267225   |
| H236 | -6.206024347  | 2.051052224  | 1.369008630   |
| H237 | -7.019300743  | -0.582302842 | 3.468899005   |
| H238 | -9.855296998  | 1.963988092  | -0.227485259  |
| H239 | -2.227018866  | 1.537814990  | -2.706064658  |
| H240 | -10.225922151 | 0.230897793  | -0.163328016  |

|      |              |               |               |
|------|--------------|---------------|---------------|
| H241 | 10.298867902 | 3.254813043   | 2.617978864   |
| H242 | 8.689605016  | 3.346539413   | 2.354280644   |
| H243 | 1.578405755  | 5.986989164   | -1.466943158  |
| H244 | -0.656452005 | 5.458194253   | 0.262175067   |
| H245 | 1.745943441  | 8.076640693   | 0.310774396   |
| H246 | -3.502743468 | 3.545736731   | -1.623750514  |
| H247 | -5.137458220 | 4.171431151   | -2.802990913  |
| H248 | -6.705113453 | 3.384667985   | -4.206964190  |
| H249 | -4.817515981 | 5.414434021   | -1.855766664  |
| H250 | -5.531998842 | 1.246264987   | -4.095710802  |
| H251 | -7.313769473 | 1.270562154   | -3.902999727  |
| H252 | -0.040447291 | 11.598057304  | -1.842586260  |
| H253 | -1.205370222 | 12.925477779  | -1.677299609  |
| H254 | -0.911461209 | 10.206064695  | -3.341699883  |
| H255 | -2.600283934 | 9.699210087   | -3.342385041  |
| H256 | -3.760014200 | 9.165955893   | -6.073267919  |
| H257 | -2.659571737 | 4.858179646   | -5.758458902  |
| H258 | -7.271985422 | 8.703645491   | -0.564570449  |
| H259 | -3.108300573 | 8.563189976   | 2.149721464   |
| H260 | -4.674906268 | 7.793494394   | -2.952979029  |
| H261 | 1.058477812  | 5.376966359   | -3.906480773  |
| H262 | 2.347394742  | 7.195338323   | -3.276730938  |
| H263 | -1.401085499 | 4.888301315   | -3.358932623  |
| H264 | -8.382892736 | -0.196076517  | -1.493727748  |
| H265 | 3.642820796  | 10.012894177  | -4.163309230  |
| H266 | -6.119958397 | -0.960475224  | -3.087850218  |
| H267 | 0.525591896  | 6.358506956   | -5.268184511  |
| H268 | -3.402619327 | 6.978656553   | 0.289733857   |
| H269 | 3.345392760  | 10.305211130  | -2.435818318  |
| H270 | -3.048871944 | 7.722503215   | -6.705700859  |
| H271 | -5.118080498 | 8.945481697   | -4.168448853  |
| H272 | -5.212689387 | -3.533953794  | -3.448960088  |
| H273 | -5.808863431 | -3.340412383  | -0.806487732  |
| H274 | -6.921615541 | 10.374635942  | 1.230904912   |
| H275 | -5.257003062 | 1.374192416   | -1.627962287  |
| H276 | -0.487800935 | 8.023741161   | -3.707052933  |
| H277 | -1.748684752 | 6.353713431   | -5.999945476  |
| H278 | -0.691329633 | 4.203712727   | -4.815358212  |
| H279 | -3.602865362 | 5.878141243   | -3.672230624  |
| H280 | 0.791272424  | 8.903719064   | 2.942005799   |
| H281 | -0.465583171 | 9.759819285   | 0.111063735   |
| H282 | -0.082777424 | 12.622214080  | 0.402266995   |
| H283 | 2.266253437  | 9.433719469   | 2.098510238   |
| H284 | -2.444645827 | 10.661919561  | 1.748348592   |
| H285 | 4.604225388  | -3.035298257  | -9.138091629  |
| H286 | 4.573956109  | -4.481581971  | -8.110956847  |
| H287 | 7.923290515  | -5.228685033  | -5.151030714  |
| H288 | 5.050677632  | -5.126976103  | -10.366434248 |
| H289 | 3.506345713  | -5.598613321  | -10.084089911 |
| H290 | 5.492426433  | 4.746404893   | -1.052338077  |
| H291 | 5.672606028  | 7.370464941   | 0.509846557   |
| H292 | 4.827381192  | 8.091365903   | -3.629507845  |
| H293 | 4.082447960  | 5.548052352   | -0.298700122  |
| H294 | 6.800537560  | 7.988238781   | -0.499435432  |
| H295 | 5.401430686  | 2.767036350   | -6.787122819  |
| H296 | 6.008033737  | 6.771823364   | -2.341121188  |
| H297 | 5.319189911  | -7.058247776  | 4.997513602   |
| H298 | 7.067293220  | -7.918807539  | 2.627943484   |
| H299 | 3.614090723  | 1.357495727   | -6.818927495  |
| H300 | 5.169880373  | -0.184401735  | 3.285491215   |
| H301 | 0.562516082  | 1.568729946   | -8.702819814  |
| H302 | -1.150353561 | -2.170735213  | -4.363711426  |
| H303 | 0.434214721  | 2.084370934   | -7.016947139  |
| H304 | 4.235484954  | -4.564321776  | 4.479297102   |
| H305 | 2.091023786  | 0.046750740   | -6.605391784  |
| H306 | 3.936546481  | -5.151748723  | 2.837506483   |
| H307 | 4.784286777  | -7.355648173  | 3.326150289   |
| H308 | 6.432499149  | -5.527712064  | 2.576391475   |
| H309 | 6.649042322  | -5.099000840  | 4.281239222   |
| H310 | -5.191747104 | -0.792807947  | -6.432125460  |
| H311 | 5.946901588  | -9.509993015  | 4.898067615   |
| H312 | 4.990784606  | -11.806659459 | 3.109147731   |
| H313 | 0.203754081  | -0.076608185  | -4.135959511  |
| H314 | 6.285909303  | -11.875544154 | 5.724097451   |
| H315 | 4.724686605  | -12.169412356 | 5.324709869   |
| H316 | 5.556725862  | -3.395878944  | 2.061302876   |
| H317 | -0.719459970 | 2.079813592   | -4.865204930  |
| H318 | -3.376213567 | -2.080911899  | -5.462142802  |
| H319 | 7.660942841  | -9.924485366  | -1.673249709  |
| H320 | 6.654951436  | -7.640480013  | -3.742579107  |

|       |              |               |              |
|-------|--------------|---------------|--------------|
| H321  | 6.633820267  | -8.163128397  | -0.115785622 |
| H322  | 6.807219148  | -10.530386157 | -2.822541908 |
| H323  | 4.906790597  | 2.566465183   | -9.516378326 |
| H324  | 6.328619325  | -5.021821337  | -0.195229297 |
| H325  | 2.299675917  | -7.718983335  | 0.795765150  |
| H326  | 3.265614107  | -2.005582133  | -7.628117675 |
| H327  | 3.114642361  | -9.182729810  | -0.830222383 |
| H328  | 3.161417183  | -7.077493389  | -7.080949059 |
| H329  | 2.278650269  | -5.551887312  | -5.253452703 |
| H330  | 6.592224909  | -12.456770953 | 3.479293906  |
| H331  | 5.883063908  | -1.152740615  | 2.059823845  |
| H332  | 8.332061112  | -5.805777408  | 0.820905894  |
| H333  | 7.218356686  | -3.760698176  | -0.064238878 |
| H334  | 8.967681812  | -6.866145171  | 2.798616229  |
| H335  | 3.607089658  | -2.765851799  | 5.093703372  |
| H336  | 3.798316748  | -8.299169873  | -3.683848360 |
| H337  | 5.016046913  | -8.595340156  | -2.435633462 |
| H338  | 1.957689099  | -8.706968844  | -2.084005706 |
| H339  | 1.319495630  | -2.140751654  | -6.177389586 |
| H340  | -2.960008464 | 2.179979576   | -5.996408906 |
| H341  | -5.114928076 | 0.982808784   | -6.579390987 |
| H342  | 2.323855712  | -5.957472237  | 0.567067495  |
| H343  | 8.500091770  | -7.335438758  | 0.587847054  |
| H344  | 7.394156942  | -9.255904662  | 0.670437779  |
| H345  | 4.205712690  | -1.140398252  | 5.154698741  |
| H346  | 5.618864724  | -7.713285233  | -6.701136763 |
| H347  | 6.557997427  | -5.981518075  | -3.176243530 |
| H348  | 0.442848144  | -2.936130372  | -7.517665120 |
| H349  | 4.286135326  | 4.140933892   | -6.964102827 |
| H350  | 7.791751617  | 0.176191353   | 3.917650849  |
| H351  | 7.799331869  | 0.592819158   | 2.188666759  |
| H352  | 9.039718729  | -6.855829989  | -6.435260722 |
| H353  | 8.294107799  | -8.103765567  | -5.684009233 |
| H354  | 10.308356239 | -8.526940572  | -1.630847376 |
| H355  | 8.589574993  | -8.235549295  | -3.098158486 |
| H356  | 11.721409502 | -7.555100764  | -3.791411349 |
| H357  | 10.174392799 | -6.800647318  | -1.245060509 |
| H358  | 10.552634594 | 0.351080400   | 2.141053426  |
| H359  | -2.982627347 | 13.221440467  | 3.723227218  |
| H360  | 10.236693335 | -6.876043973  | 5.527726112  |
| H361  | 9.519487713  | -4.460583514  | 4.410496111  |
| H362  | -4.710262513 | 12.333058192  | 1.406610727  |
| H363  | -4.098590408 | 10.317753445  | 3.656796153  |
| H364  | -5.687557038 | 11.014286980  | 3.293760589  |
| H365  | 1.172272822  | -3.313994858  | -1.279853496 |
| H366  | 3.718527150  | -1.503277465  | 0.766724255  |
| H367  | -6.446487466 | 6.829265979   | -1.567960364 |
| H368  | 0.103031894  | -1.367841631  | -0.286115461 |
| H369  | -1.894278966 | -0.164515965  | -0.874283410 |
| Mo370 | 3.830443141  | -4.391144736  | -2.524691527 |
| N371  | -7.013807855 | -7.190017846  | -0.302911588 |
| N372  | -8.832521092 | -4.660917992  | 1.773225988  |
| N373  | -8.189346931 | -4.952195466  | 4.496510045  |
| N374  | -5.502174197 | -5.797819133  | 4.489876697  |
| N375  | -4.225708850 | -3.413422289  | 3.646142990  |
| N376  | -4.879868673 | -1.778442763  | 5.916279921  |
| N377  | -3.686617568 | -3.146577768  | 8.156335437  |
| N378  | -1.126774760 | -4.423197719  | 7.535402826  |
| N379  | 0.228764686  | -2.499380723  | 6.175465850  |
| N380  | -0.390305237 | 0.419149120   | 6.820237010  |
| N381  | -0.702394447 | 0.221918620   | 9.695167915  |
| N382  | 5.515946520  | -11.553162525 | 5.133545360  |
| N383  | 6.408782096  | -9.299770210  | 4.007120730  |
| N384  | 5.019856207  | -3.366874975  | 2.933301075  |
| N385  | 4.243574161  | -2.054961435  | 4.714433314  |
| N386  | 5.515323000  | -1.104086100  | 3.020970975  |
| N387  | 9.047192288  | -6.983035040  | 3.833481843  |
| N388  | -5.895764357 | -2.954171505  | -2.926343701 |
| N389  | -1.958295795 | -5.569574441  | -3.210317261 |
| N390  | -6.109948378 | -0.449534882  | -2.188515539 |
| N391  | -8.363607300 | 0.676105168   | -0.969625804 |
| N392  | -7.851134171 | 0.358780835   | 1.772970827  |
| N393  | -5.712580430 | 2.106251768   | 2.264878905  |
| N394  | -3.165501999 | 2.687861839   | -1.112936901 |
| N395  | -2.418346702 | 0.704147840   | -0.723403861 |
| N396  | -6.345628915 | 4.734547166   | 2.898834682  |
| N397  | -9.757446219 | 7.751321559   | 1.603490812  |
| N398  | -9.660638186 | 9.538527629   | 2.914996591  |
| N399  | 9.480719416  | 2.696949338   | 2.361306566  |
| N400  | 6.258164526  | 7.142982702   | -0.300261963 |

|      |              |               |               |
|------|--------------|---------------|---------------|
| N401 | 4.219190536  | 8.457217109   | -2.901515424  |
| N402 | 1.558190727  | 7.844358127   | -3.371664428  |
| N403 | -3.180519588 | 6.405683211   | -4.457619894  |
| N404 | -3.390146068 | 8.236410796   | -5.900907443  |
| N405 | -4.456070999 | 8.245851795   | -3.843887694  |
| N406 | 0.687673675  | 6.333786474   | -1.083487988  |
| N407 | 0.979606946  | 8.225387444   | 0.973942306   |
| N408 | -0.374677293 | 10.609850661  | 0.667050741   |
| N409 | -1.886430240 | 10.367803748  | -3.059274217  |
| N410 | -2.753747738 | 11.630141756  | 1.711987519   |
| N411 | 4.102596527  | -4.775979781  | -10.212953676 |
| N412 | 2.448612559  | -2.564515708  | -7.889012187  |
| N413 | 1.394200089  | 0.235924130   | -7.346436361  |
| N414 | 3.482238871  | 2.217278834   | -7.361762402  |
| N415 | -1.718360222 | -2.997062331  | -10.093576765 |
| N416 | -3.287604457 | -1.172787910  | -8.522643903  |
| N417 | 8.165985637  | -7.130073892  | -5.977070777  |
| N418 | 4.273739424  | -5.695934678  | -4.441986997  |
| N419 | 3.729615381  | -6.728027958  | -6.313631955  |
| N420 | 9.246359337  | -7.451142557  | -3.049912002  |
| N421 | -0.013016557 | 2.517935592   | -0.232315467  |
| N422 | 2.325231198  | -0.195205174  | 0.561684226   |
| N423 | 0.801063989  | 1.802630428   | -0.525480872  |
| N424 | 2.963182552  | -0.916066417  | 1.263392104   |
| O425 | -6.608449524 | -5.129801775  | 1.669269750   |
| O426 | -7.310125273 | -2.847306764  | 4.499438458   |
| O427 | -5.344061385 | -5.219103972  | 6.692141413   |
| O428 | -2.451906247 | -4.058076112  | 4.919505724   |
| O429 | -2.986732841 | -0.609407447  | 5.458879632   |
| O430 | -3.280879994 | -1.064490154  | 9.018241548   |
| O431 | -0.575201029 | -4.107589931  | 9.738482237   |
| O432 | 2.156897308  | -3.753317870  | 6.055099221   |
| O433 | 1.891579481  | 0.342301189   | 6.726178781   |
| O434 | 0.794897572  | 1.928042919   | 9.760362918   |
| O435 | 1.506873661  | -0.299865649  | 12.477494627  |
| O436 | 7.053807791  | -10.347477132 | 2.050133404   |
| O437 | 8.047109981  | -7.720748044  | 5.768820302   |
| O438 | 11.553354360 | -4.513230433  | 4.548017361   |
| O439 | -5.657728500 | -0.845457110  | 0.025141993   |
| O440 | -3.738956127 | -4.408915442  | -4.018858765  |
| O441 | -7.121123626 | 2.514218569   | -0.426613413  |
| O442 | -6.343072353 | 3.041619721   | -3.370516929  |
| O443 | -9.764990796 | 1.520060122   | 2.279200587   |
| O444 | -5.597166268 | 1.430381260   | 4.446598750   |
| O445 | -4.249111361 | 5.071771947   | 3.742831355   |
| O446 | -6.572675815 | 7.272543482   | 5.358529794   |
| O447 | 10.801596988 | -0.043116817  | 4.128901771   |
| O448 | 3.589496411  | 4.728745299   | 3.948668448   |
| O449 | 3.615430254  | 8.360099381   | -0.705791620  |
| O450 | 0.990463604  | 10.068801304  | -3.527930304  |
| O451 | -1.386705669 | 7.182312903   | -1.529833081  |
| O452 | -0.682292479 | 7.153470490   | 2.140409873   |
| O453 | 2.478813322  | 5.733175614   | 1.442623774   |
| O454 | 0.847674876  | 11.606109931  | 2.328928984   |
| O455 | -2.506954752 | 13.591421354  | 0.576151749   |
| O456 | -3.257841219 | 11.020768687  | -1.350777141  |
| O457 | -4.958626159 | 13.723084700  | 3.626023991   |
| O458 | -5.502389505 | 6.849267631   | -1.317738852  |
| O459 | 1.750098977  | -4.575189304  | -8.754711403  |
| O460 | -0.283460907 | -0.732703512  | -8.573400583  |
| O461 | 2.124913624  | 3.613757995   | -8.534930158  |
| O462 | 5.769096195  | 4.373064042   | -9.120072288  |
| O463 | -5.003361298 | -2.629553635  | -8.886733682  |
| O464 | -1.498637986 | -6.587011271  | -6.018572394  |
| O465 | 0.437721660  | -5.781048503  | -6.780786429  |
| O466 | -3.977464481 | 2.327786448   | -8.448002782  |
| O467 | 9.937166710  | -5.392344786  | -3.701101145  |
| O468 | 12.670009505 | -6.968312566  | -2.081218349  |
| O469 | 0.311254109  | -6.275909303  | -1.409755194  |
| O470 | -0.243416661 | -7.339634495  | 0.491704577   |
| O471 | 5.178559487  | -10.909494003 | -3.335931545  |
| O472 | 2.919273055  | -10.953444883 | -3.312670887  |
| O473 | 5.087725266  | -5.783403711  | -1.348313820  |
| O474 | 5.038513113  | -7.473993093  | 0.128517003   |
| O475 | 2.627948016  | -6.117801304  | -2.161998552  |
| O476 | 8.931741973  | -6.559347369  | 1.042927708   |
| O477 | 6.942886744  | -4.555678772  | 0.430847832   |
| O478 | -4.404198559 | 4.751562096   | -2.462513521  |
| O479 | 7.758140463  | -10.410323128 | -2.522541048  |
| O480 | 7.508838193  | -8.635381262  | -0.093411880  |

|      |             |              |              |
|------|-------------|--------------|--------------|
| S481 | 3.640103758 | 4.983644287  | -2.630306333 |
| S482 | 1.944153413 | 1.756277751  | -3.254345761 |
| S483 | 2.071705234 | -3.369966800 | -3.765427960 |
| S484 | 3.865373604 | 2.018918366  | -0.333209570 |
| S485 | 0.424703713 | -0.978130769 | -1.553637989 |
| S486 | 4.016067072 | -0.686475611 | -5.571065566 |
| S487 | 3.357900243 | -3.491726173 | -0.344709899 |
| S488 | 5.689192745 | 1.613111130  | -3.267552550 |
| S489 | 5.688648322 | -3.067828613 | -3.159302279 |
| S490 | 6.245946290 | -0.912951121 | -0.310145221 |
| end  |             |              |              |

## Fe2-N-NH-a to Fe2-NH-NH-a

Figure 8, scheme E

| reactant Fe2-N-NH-a (S=3/2) | bm522nnhtrha335td.car_3 |              |               |              |
|-----------------------------|-------------------------|--------------|---------------|--------------|
| Fe( 139) -2.255             | C1                      | -7.763288267 | -5.376633909  | 1.313923337  |
| Fe( 140) 0.036              | C2                      | -8.096510588 | -6.536688647  | 0.369043092  |
| Fe( 141) -2.443             | C3                      | -8.659116445 | -3.481498644  | 2.593630301  |
| Fe( 142) 2.380              | C4                      | -8.011985367 | -3.742601818  | 3.951932560  |
| Fe( 143) 2.799              | C5                      | -7.598786118 | -5.339182399  | 5.760107136  |
| Fe( 144) 1.965              | C6                      | -6.073230516 | -5.460819901  | 5.693228227  |
| Fe( 145) 0.517              | C7                      | -4.095950153 | -5.791711028  | 4.302749320  |
|                             | C8                      | -3.520386595 | -4.373995858  | 4.329151063  |
|                             | C9                      | -3.865021962 | -2.027523688  | 3.724493264  |
|                             | C10                     | -3.869871417 | -1.435486798  | 5.141151755  |
|                             | C11                     | -4.941521968 | -1.265053199  | 7.299207340  |
|                             | C12                     | -3.889847035 | -1.856293769  | 8.248866612  |
|                             | C13                     | -2.910184009 | -3.904679500  | 9.173798636  |
|                             | C14                     | -1.433843364 | -4.155367891  | 8.837941857  |
|                             | C15                     | 0.217296213  | -4.701204380  | 7.093861874  |
|                             | C16                     | 0.950105719  | -3.570826363  | 6.370699023  |
|                             | C17                     | 0.695668629  | -1.279626032  | 5.436240421  |
|                             | C18                     | 0.775963745  | -0.073157608  | 6.387133087  |
|                             | C19                     | -0.093117947 | -1.024272051  | 4.130203792  |
|                             | C20                     | 0.320808553  | 0.308153358   | 3.498607903  |
|                             | C21                     | 0.092769903  | -2.191874670  | 3.153021437  |
|                             | C22                     | -0.427410014 | 1.633602713   | 7.672986073  |
|                             | C23                     | -0.078859897 | 1.281129008   | 9.130551226  |
|                             | C24                     | -1.768285642 | 2.391367097   | 7.530300801  |
|                             | C25                     | -1.855925796 | 3.553886368   | 8.525064109  |
|                             | C26                     | -1.945816369 | 2.903912689   | 6.094508243  |
|                             | C27                     | -0.473801726 | -0.128800973  | 11.061488870 |
|                             | C28                     | 0.990465492  | -0.407195119  | 11.337327827 |
|                             | C29                     | 5.879247029  | -11.657926693 | 3.682668959  |
|                             | C30                     | 6.519467071  | -10.378795843 | 3.156628010  |
|                             | C31                     | 6.821185956  | -7.968570501  | 3.687978204  |
|                             | C32                     | 8.044510176  | -7.569863229  | 4.533184842  |
|                             | C33                     | 5.634500324  | -7.023365296  | 3.936874134  |
|                             | C34                     | 5.944608963  | -5.576976777  | 3.563399556  |
|                             | C35                     | 4.680372501  | -4.723920595  | 3.490823433  |
|                             | C36                     | 4.922906966  | -2.238386674  | 3.619300280  |
|                             | C37                     | 10.276205753 | -6.552196639  | 4.469391653  |
|                             | C38                     | 10.442705507 | -5.049019672  | 4.469071039  |
|                             | C39                     | -5.372981734 | -2.674678401  | -1.591438923 |
|                             | C40                     | -5.732328119 | -1.238177789  | -1.167048986 |
|                             | C41                     | -3.836050170 | -2.815663630  | -1.522905602 |
|                             | C42                     | -3.274562638 | -4.247663695  | -1.635361117 |
|                             | C43                     | -3.007908385 | -4.741299129  | -3.057974755 |
|                             | C44                     | -6.190952189 | 1.000913666   | -2.084398975 |
|                             | C45                     | -7.269706740 | 1.476621652   | -1.100953135 |
|                             | C46                     | -6.363507792 | 1.605045654   | -3.483568891 |
|                             | C47                     | -9.423778236 | 0.987814805   | -0.040180892 |
|                             | C48                     | -9.015065458 | 0.980499250   | 1.436092739  |
|                             | C49                     | -7.305051505 | 0.403673301   | 3.095413610  |
|                             | C50                     | -6.114702853 | 1.338341773   | 3.315656779  |
|                             | C51                     | -4.613282022 | 3.051658412   | 2.423123007  |
|                             | C52                     | -5.045089776 | 4.362074046   | 3.122941462  |
|                             | C53                     | -4.015734622 | 3.490303055   | 1.078280482  |
|                             | C54                     | -3.371922793 | 2.435856071   | 0.241570102  |
|                             | C55                     | -2.846308030 | 1.193462193   | 0.498559695  |
|                             | C56                     | -2.538919048 | 1.619911327   | -1.665981540 |
|                             | C57                     | -6.847476818 | 6.035445827   | 3.279831248  |
|                             | C58                     | -6.722113362 | 6.209797787   | 4.792236066  |
|                             | C59                     | -8.332316599 | 6.098846044   | 2.847422056  |
|                             | C60                     | -8.935019522 | 7.466940035   | 2.712723559  |
|                             | C61                     | -8.873591595 | 8.569067788   | 3.543551999  |

|       |               |               |              |
|-------|---------------|---------------|--------------|
| C62   | -10.132820484 | 9.007695097   | 1.774059432  |
| C63   | 9.261995206   | 1.686731584   | 3.339254879  |
| C64   | 10.300105081  | 0.594061873   | 3.161367238  |
| C65   | 7.870690228   | 1.028176698   | 3.177717580  |
| C66   | 6.733720938   | 1.993370775   | 3.413787040  |
| C67   | 6.150910644   | 2.152481887   | 4.683147943  |
| C68   | 6.234137086   | 2.778539246   | 2.358985698  |
| C69   | 5.102233412   | 3.056268176   | 4.895141687  |
| C70   | 5.208703281   | 3.701288728   | 2.559390657  |
| C71   | 4.635644273   | 3.832941708   | 3.826712708  |
| C72   | 5.376945944   | 6.834314134   | -1.444129434 |
| C73   | 4.322658045   | 7.937704841   | -1.644383218 |
| C74   | 4.702631255   | 5.494307143   | -1.162811016 |
| C75   | 3.309660393   | 9.530177521   | -3.237277323 |
| C76   | 1.831972367   | 9.156009742   | -3.392530614 |
| C77   | 0.210857741   | 7.258933063   | -3.333993623 |
| C78   | -0.236460204  | 6.915461878   | -1.888648506 |
| C79   | 0.235472254   | 6.011888790   | -4.247769409 |
| C80   | -1.019101781  | 5.136022077   | -4.354025896 |
| C81   | -2.161776228  | 5.680228104   | -5.228488027 |
| C82   | -3.696815841  | 7.587025532   | -4.752225721 |
| C83   | 0.320035337   | 5.969493746   | 0.303412594  |
| C84   | 0.134857815   | 7.179241771   | 1.229174814  |
| C85   | 1.352934028   | 5.029666016   | 0.963608813  |
| C86   | 1.188956707   | 9.249089309   | 1.997167125  |
| C87   | 0.549270625   | 10.594459299  | 1.689040933  |
| C88   | -0.842057557  | 11.865908905  | 0.144259222  |
| C89   | -2.121221606  | 12.422448634  | 0.813517997  |
| C90   | -0.979560286  | 11.872980687  | -1.380467746 |
| C91   | -2.138062228  | 11.036632701  | -1.910285490 |
| C92   | -4.068857595  | 11.949438302  | 2.221508214  |
| C93   | -3.984395389  | 13.057976881  | 3.262568417  |
| C94   | -4.731899621  | 10.687438810  | 2.839282955  |
| C95   | -4.971703196  | 9.611554876   | 1.805166878  |
| C96   | -6.141526956  | 9.620541346   | 1.030888727  |
| C97   | -4.014385301  | 8.617497362   | 1.547010398  |
| C98   | -6.342257418  | 8.684003595   | 0.015751328  |
| C99   | -4.186830775  | 7.685853970   | 0.518507654  |
| C100  | -5.351313765  | 7.736534295   | -0.241770960 |
| C101  | 4.066309181   | -4.005591708  | -8.995922219 |
| C102  | 2.638006398   | -3.736679628  | -8.556319150 |
| C103  | 1.182224687   | -2.179260282  | -7.283319741 |
| C104  | 0.681778755   | -0.828389711  | -7.805804829 |
| C105  | 1.087400394   | 1.597632351   | -7.757481923 |
| C106  | 2.277516061   | 2.536350069   | -7.941837431 |
| C107  | 4.570189581   | 3.153525138   | -7.425718259 |
| C108  | 5.068402969   | 3.413259098   | -8.833534400 |
| C109  | -2.758008203  | -3.492117892  | -9.195000801 |
| C110  | -3.783360727  | -2.395377950  | -8.880847076 |
| C111  | -2.276786926  | -4.156351393  | -7.885618349 |
| C112  | -1.557182537  | -5.487430909  | -8.169960879 |
| C113  | -0.899498228  | -6.014919986  | -6.914611122 |
| C114  | -4.178423382  | -0.0744446037 | -8.216721985 |
| C115  | -3.699110351  | 1.206405112   | -8.870010659 |
| C116  | -4.534878661  | 0.053567216   | -6.715041849 |
| C117  | -3.305969778  | 0.030713873   | -5.848020468 |
| C118  | -2.546812030  | 1.195349214   | -5.637255658 |
| C119  | -2.826647243  | -1.190623825  | -5.345683322 |
| C120  | -1.304809134  | 1.119863255   | -4.999032839 |
| C121  | -1.587758679  | -1.264804050  | -4.701821609 |
| C122  | -0.811964743  | -0.110759714  | -4.555379777 |
| C123  | 7.949484120   | -6.292216639  | -4.801645795 |
| C124  | 9.116098955   | -6.339892213  | -3.802295256 |
| C125  | 6.626388649   | -6.586853815  | -4.078319072 |
| C126  | 5.376988682   | -6.411539121  | -4.878906878 |
| C127  | 5.035352857   | -7.051383400  | -6.052874008 |
| C128  | 3.289390082   | -5.911589330  | -5.306853633 |
| C129  | 10.321063150  | -7.525552251  | -2.070343027 |
| C130  | 11.682273243  | -7.306194959  | -2.693874772 |
| C131  | 0.622006143   | -6.886111230  | -0.252418862 |
| C132  | 2.109866583   | -6.906073092  | 0.078731027  |
| C133  | 3.041159018   | -7.056104369  | -1.162954320 |
| C134  | 2.977273091   | -8.515328645  | -1.689129408 |
| C135  | 4.021776516   | -8.873534146  | -2.748676146 |
| C136  | 4.045325269   | -10.366924905 | -3.142312540 |
| C137  | 4.490696585   | -6.759091188  | -0.741400170 |
| C138  | 3.553054193   | -0.719027766  | -2.229337629 |
| Fe139 | 3.807053115   | -1.979113679  | -3.797267298 |
| Fe140 | 2.129773148   | 0.708843366   | -1.177368406 |
| Fe141 | 4.927023980   | 0.489849444   | -1.462320279 |

|       |              |              |               |
|-------|--------------|--------------|---------------|
| Fe142 | 3.828149296  | 0.544403438  | -3.754136541  |
| Fe143 | 3.785101105  | 2.714026491  | -2.402373878  |
| Fe144 | 4.723316058  | -2.061223610 | -1.434593083  |
| Fe145 | 2.230852821  | -2.290551958 | -1.807946686  |
| H146  | -6.292478097 | -7.490107005 | 0.410334162   |
| H147  | -6.477782609 | -6.506871774 | -0.878968156  |
| H148  | -9.755380701 | -4.855026285 | 1.377478088   |
| H149  | -8.811807314 | -6.182228688 | -0.390663456  |
| H150  | -8.639254451 | -7.287371719 | 0.969433690   |
| H151  | -8.027031268 | -2.739830509 | 2.083775635   |
| H152  | -8.792681828 | -5.636248393 | 3.995671157   |
| H153  | -9.645082786 | -3.026562917 | 2.760657461   |
| H154  | -8.017375190 | -6.301933438 | 6.082172422   |
| H155  | -6.136123610 | -5.853813336 | 3.669392280   |
| H156  | -7.819978868 | -4.595247480 | 6.536727042   |
| H157  | -2.853407318 | -1.888516634 | 3.323219814   |
| H158  | -5.092215267 | -3.699666276 | 3.179950925   |
| H159  | -3.862209469 | -6.261968790 | 3.338109274   |
| H160  | -4.777590667 | -0.179401863 | 7.279070604   |
| H161  | -5.682957640 | -2.327080547 | 5.572307205   |
| H162  | -3.598200001 | -6.362129290 | 5.095818080   |
| H163  | -4.565428989 | -1.465384444 | 3.091948117   |
| H164  | -4.303325741 | -3.755838263 | 7.556293140   |
| H165  | -5.938984210 | -1.462670897 | 7.716335676   |
| H166  | -0.211333549 | -3.147807324 | 3.603125052   |
| H167  | -0.529509739 | -2.036936407 | 2.257277307   |
| H168  | 1.137726121  | -2.268101844 | 2.816317863   |
| H169  | -1.156959357 | -0.959938812 | 4.402113034   |
| H170  | -3.374367184 | -4.884520322 | 9.360427168   |
| H171  | -1.946574762 | 2.088687280  | 5.358430803   |
| H172  | -1.493800832 | -0.250520044 | 9.194123989   |
| H173  | -1.819652075 | 3.215985568  | 9.570514611   |
| H174  | 1.390843892  | 0.313593653  | 3.247761098   |
| H175  | 0.109390084  | 1.160609302  | 4.160563241   |
| H176  | 9.344334263  | 2.050281163  | 4.381465767   |
| H177  | -2.901162272 | 3.438901954  | 5.994572470   |
| H178  | -2.800366725 | 4.097532102  | 8.376097737   |
| H179  | -1.135552395 | 3.605385580  | 5.835900040   |
| H180  | -1.026921239 | 4.262631005  | 8.369101511   |
| H181  | -2.584595836 | 1.680273270  | 7.753329095   |
| H182  | 0.390491701  | 2.295376029  | 7.349933348   |
| H183  | -1.288933355 | 0.095624695  | 6.435381203   |
| H184  | -0.224585321 | 0.466323897  | 2.556411351   |
| H185  | 1.686373551  | 4.292794379  | 0.218961051   |
| H186  | 0.834229380  | 4.495023268  | 1.772483058   |
| H187  | 2.719638076  | 5.370975037  | 2.341947630   |
| H188  | 3.234730268  | 4.688096980  | 4.865185579   |
| H189  | 4.826135216  | 4.294762728  | 1.728438447   |
| H190  | 6.637687887  | 2.646806739  | 1.352529896   |
| H191  | 6.510819132  | 1.552925768  | 5.524527758   |
| H192  | -0.760212508 | -2.491186789 | 6.427303037   |
| H193  | 0.204918993  | -5.568014329 | 6.416725970   |
| H194  | 0.813365832  | -4.971284517 | 7.975574800   |
| H195  | -1.873832761 | -4.425421642 | 6.817987378   |
| H196  | -2.918281424 | -3.334086234 | 10.110519926  |
| H197  | 4.646219987  | 3.151006319  | 5.884603941   |
| H198  | 1.739236560  | -1.485093042 | 5.170438578   |
| H199  | -0.821556219 | 0.649167888  | 11.760770646  |
| H200  | -1.027725644 | -1.054737217 | 11.282157936  |
| H201  | 1.585074025  | -0.741064634 | 10.455027052  |
| H202  | 11.161233853 | -7.016243857 | 4.006785003   |
| H203  | -1.764554457 | -5.954740069 | -4.139173185  |
| H204  | 1.265929378  | -6.064305463 | -1.877760419  |
| H205  | -2.294535713 | -6.231048077 | -8.506085057  |
| H206  | -0.811833384 | -5.354068099 | -8.966958875  |
| H207  | -3.132577397 | -4.348179568 | -7.220023792  |
| H208  | -3.154413935 | 1.049922954  | -9.830825147  |
| H209  | -3.348019698 | -4.241657245 | -9.745023405  |
| H210  | -3.391708120 | -2.181936248 | -2.308601592  |
| H211  | -3.969183877 | -4.967400629 | -1.168790584  |
| H212  | -2.271827250 | -1.023681871 | -8.492837404  |
| H213  | -5.124020615 | -0.305808683 | -8.749721327  |
| H214  | -1.036144728 | -2.410913929 | -9.624816294  |
| H215  | -1.314708201 | -5.802016355 | -2.444573223  |
| H216  | -1.615206977 | -3.456552637 | -7.351754910  |
| H217  | -1.203263484 | -3.795509021 | -10.501197265 |
| H218  | -6.784819882 | -3.453994328 | -2.882640662  |
| H219  | -3.517890391 | -2.405213265 | -0.553110202  |
| H220  | 0.804973119  | -5.309523938 | -7.581143185  |
| H221  | -2.344718826 | -4.312388258 | -1.052018186  |

|      |               |              |               |
|------|---------------|--------------|---------------|
| H222 | -3.848808761  | 2.599944888  | 3.070077563   |
| H223 | -2.792324516  | 0.616896445  | 1.413655998   |
| H224 | -8.106303558  | 0.744929323  | 3.765519527   |
| H225 | -7.266517676  | -0.064516404 | 1.015118380   |
| H226 | -6.958548382  | 4.064748671  | 2.443422490   |
| H227 | -8.355415212  | 8.750677704  | 4.478149127   |
| H228 | -6.865733559  | 5.260299221  | 5.364623896   |
| H229 | -8.930897304  | 5.469378949  | 3.529688439   |
| H230 | -6.268302057  | 6.829723109  | 2.783183225   |
| H231 | -10.774143908 | 9.567688523  | 1.099301504   |
| H232 | -3.270122430  | 4.270861002  | 1.298722010   |
| H233 | -4.807475864  | 3.968159102  | 0.480252294   |
| H234 | -9.799895131  | 10.478049388 | 3.278601205   |
| H235 | -8.405017723  | 5.632541832  | 1.851956598   |
| H236 | -6.196241505  | 2.051624187  | 1.358687837   |
| H237 | -7.014252196  | -0.600901293 | 3.436512495   |
| H238 | -9.845195678  | 1.983890914  | -0.235656964  |
| H239 | -2.227959021  | 1.510509103  | -2.703293376  |
| H240 | -10.227667810 | 0.253140652  | -0.179626501  |
| H241 | 10.300424123  | 3.276911025  | 2.573150893   |
| H242 | 8.689739028   | 3.367062356  | 2.321386506   |
| H243 | 1.577222851   | 5.987180335  | -1.449831559  |
| H244 | -0.650187247  | 5.452842977  | 0.280125058   |
| H245 | 1.747015903   | 8.071874761  | 0.331786965   |
| H246 | -3.517522311  | 3.514881179  | -1.627042360  |
| H247 | -5.141111539  | 4.164557358  | -2.810848015  |
| H248 | -6.705054144  | 3.386375366  | -4.230779457  |
| H249 | -4.814820273  | 5.397744017  | -1.853249619  |
| H250 | -5.534667916  | 1.247889437  | -4.116990621  |
| H251 | -7.316187781  | 1.270569526  | -3.922274590  |
| H252 | -0.025478987  | 11.578425654 | -1.839835180  |
| H253 | -1.180224447  | 12.914018204 | -1.678953222  |
| H254 | -0.906599296  | 10.219258424 | -3.364295162  |
| H255 | -2.597237577  | 9.719265383  | -3.369080306  |
| H256 | -3.788347983  | 9.138844717  | -6.085743705  |
| H257 | -2.656839928  | 4.852652853  | -5.759070050  |
| H258 | -7.263553469  | 8.696326731  | -0.572359862  |
| H259 | -3.109634314  | 8.547623756  | 2.156277983   |
| H260 | -4.662419046  | 7.792536733  | -2.944095926  |
| H261 | 1.056520247   | 5.366616304  | -3.895959925  |
| H262 | 2.341400242   | 7.189128129  | -3.273724787  |
| H263 | -1.403872318  | 4.871920625  | -3.356623833  |
| H264 | -8.388306168  | -0.181188686 | -1.514551919  |
| H265 | 3.638915945   | 9.994064756  | -4.176643749  |
| H266 | -6.119400759  | -0.957382245 | -3.102839380  |
| H267 | 0.525606244   | 6.350306275  | -5.255971438  |
| H268 | -3.402181231  | 6.961420343  | 0.296750161   |
| H269 | 3.348567705   | 10.297295994 | -2.450258416  |
| H270 | -3.088403411  | 7.690401044  | -6.714956329  |
| H271 | -5.125545600  | 8.931130376  | -4.167314061  |
| H272 | -5.215769784  | -3.536571689 | -3.454593705  |
| H273 | -5.808178720  | -3.331006483 | -0.814562684  |
| H274 | -6.914443623  | 10.368553235 | 1.222594312   |
| H275 | -5.254557354  | 1.379651353  | -1.650518177  |
| H276 | -0.497507572  | 8.010811334  | -3.695888183  |
| H277 | -1.744889225  | 6.349276827  | -5.992022639  |
| H278 | -0.690234966  | 4.193157407  | -4.814090669  |
| H279 | -3.600309672  | 5.868278958  | -3.667059245  |
| H280 | 0.783798901   | 8.901873995  | 2.959557031   |
| H281 | -0.450059845  | 9.748290172  | 0.118849808   |
| H282 | -0.074951368  | 12.611991815 | 0.403609482   |
| H283 | 2.265029981   | 9.428288935  | 2.124073551   |
| H284 | -2.440482122  | 10.646133400 | 1.739752830   |
| H285 | 4.592076243   | -3.054644164 | -9.165481643  |
| H286 | 4.554800592   | -4.490416973 | -8.123820459  |
| H287 | 7.933777369   | -5.257307294 | -5.174386439  |
| H288 | 5.031768834   | -5.160264727 | -10.369801334 |
| H289 | 3.487693133   | -5.626142803 | -10.083567297 |
| H290 | 5.487704892   | 4.742851873  | -1.015442252  |
| H291 | 5.720478297   | 7.398499323  | 0.488207779   |
| H292 | 4.823379843   | 8.076508454  | -3.635539950  |
| H293 | 4.096254020   | 5.564811840  | -0.248970654  |
| H294 | 6.826954793   | 7.990302299  | -0.562609049  |
| H295 | 5.406173879   | 2.723146614  | -6.851708192  |
| H296 | 5.982565601   | 6.738827497  | -2.358339998  |
| H297 | 5.331982720   | -7.096088708 | 4.994745705   |
| H298 | 7.082600007   | -7.943908527 | 2.622259507   |
| H299 | 3.599696181   | 1.341772581  | -6.849076616  |
| H300 | 5.199369543   | -0.236818140 | 3.397039857   |
| H301 | 0.542465647   | 1.561091055  | -8.708634774  |



|       |              |               |              |
|-------|--------------|---------------|--------------|
| H302  | -1.220649490 | -2.223512471  | -4.328053240 |
| H303  | 0.422038918  | 2.084953368   | -7.024192263 |
| H304  | 4.215326869  | -4.623852077  | 4.478700837  |
| H305  | 2.070762147  | 0.048512013   | -6.604972992 |
| H306  | 3.936371468  | -5.190009002  | 2.826333914  |
| H307  | 4.796573948  | -7.391964622  | 3.323587361  |
| H308  | 6.433994098  | -5.548183627  | 2.578779125  |
| H309  | 6.640030392  | -5.122727487  | 4.287015523  |
| H310  | -5.201636733 | -0.782950165  | -6.460223533 |
| H311  | 5.955000349  | -9.542409724  | 4.883265934  |
| H312  | 4.980239749  | -11.820113145 | 3.069415449  |
| H313  | 0.171616761  | -0.151093883  | -4.089395532 |
| H314  | 6.254399834  | -11.928209753 | 5.690742119  |
| H315  | 4.690157202  | -12.183986259 | 5.278862398  |
| H316  | 5.508404043  | -3.403125007  | 2.069952319  |
| H317  | -0.696317473 | 2.013681609   | -4.847588157 |
| H318  | -3.420721484 | -2.099003296  | -5.467125991 |
| H319  | 7.684912596  | -9.925602764  | -1.671608909 |
| H320  | 6.643763611  | -7.630345911  | -3.719416321 |
| H321  | 6.639984772  | -8.166912161  | -0.118495535 |
| H322  | 6.830005397  | -10.532945608 | -2.817615797 |
| H323  | 4.866966910  | 2.588961572   | -9.558933928 |
| H324  | 6.330043500  | -5.020582347  | -0.194393686 |
| H325  | 2.306207700  | -7.698180521  | 0.811156731  |
| H326  | 3.255373934  | -1.998066131  | -7.676742397 |
| H327  | 3.115146001  | -9.172784508  | -0.816241871 |
| H328  | 3.148844056  | -7.072001025  | -7.065467323 |
| H329  | 2.276265930  | -5.537565881  | -5.243095238 |
| H330  | 6.574237707  | -12.481890181 | 3.445956419  |
| H331  | 5.915833608  | -1.185661358  | 2.164455911  |
| H332  | 8.334328557  | -5.808120925  | 0.819116357  |
| H333  | 7.214969811  | -3.757066469  | -0.057171144 |
| H334  | 8.970609314  | -6.872116635  | 2.797115327  |
| H335  | 3.573021446  | -2.806389340  | 5.127001810  |
| H336  | 3.825459704  | -8.296197976  | -3.665157772 |
| H337  | 5.027343964  | -8.595755189  | -2.405017893 |
| H338  | 1.965655567  | -8.704671693  | -2.080001863 |
| H339  | 1.317917878  | -2.143988137  | -6.190486153 |
| H340  | -2.916248886 | 2.151578314   | -6.015036918 |
| H341  | -5.096964265 | 0.992326464   | -6.595977412 |
| H342  | 2.318719921  | -5.938659307  | 0.565883805  |
| H343  | 8.504230250  | -7.338316817  | 0.586765663  |
| H344  | 7.396264912  | -9.266327560  | 0.664342099  |
| H345  | 4.270502332  | -1.225143332  | 5.258058411  |
| H346  | 5.605878274  | -7.715440856  | -6.690301091 |
| H347  | 6.564805123  | -5.961191169  | -3.179883706 |
| H348  | 0.436729636  | -2.937754849  | -7.529079300 |
| H349  | 4.295913016  | 4.110265880   | -6.955141617 |
| H350  | 7.811568053  | 0.190975935   | 3.887891339  |
| H351  | 7.801723432  | 0.611133659   | 2.160047360  |
| H352  | 9.033702705  | -6.929861215  | -6.421831816 |
| H353  | 8.260829484  | -8.147870871  | -5.649157356 |
| H354  | 10.319439829 | -8.535604650  | -1.631852389 |
| H355  | 8.609794413  | -8.260295846  | -3.108449881 |
| H356  | 11.740851041 | -7.550281965  | -3.782481919 |
| H357  | 10.170320759 | -6.810233664  | -1.246323334 |
| H358  | 10.560014947 | 0.375257284   | 2.097085211  |
| H359  | -2.974929166 | 13.213858233  | 3.710480392  |
| H360  | 10.240623699 | -6.872962529  | 5.525493363  |
| H361  | 9.491333253  | -4.467436841  | 4.398581927  |
| H362  | -4.703338003 | 12.318045199  | 1.398186406  |
| H363  | -4.095693888 | 10.308653932  | 3.654639601  |
| H364  | -5.683131313 | 11.007634043  | 3.288375038  |
| H365  | 1.195333881  | -3.218552928  | -1.230077791 |
| H366  | 3.928807599  | -0.680951638  | 0.799734303  |
| H367  | -6.439290957 | 6.819234043   | -1.570748265 |
| H368  | 0.330211192  | -1.195660967  | -0.179137065 |
| H369  | -1.794704201 | -0.139028842  | -0.841650187 |
| Mo370 | 3.821509342  | -4.378436451  | -2.511533335 |
| N371  | -6.972436472 | -7.178808816  | -0.287564729 |
| N372  | -8.836151030 | -4.668929397  | 1.771490698  |
| N373  | -8.222784532 | -4.962652032  | 4.501819569  |
| N374  | -5.539188273 | -5.814520650  | 4.497525400  |
| N375  | -4.243856758 | -3.430363713  | 3.674080158  |
| N376  | -4.888485588 | -1.806292510  | 5.951503676  |
| N377  | -3.712257565 | -3.201813981  | 8.182405316  |
| N378  | -1.134576723 | -4.389539051  | 7.526907031  |
| N379  | 0.218392836  | -2.457850164  | 6.147409724  |
| N380  | -0.406323732 | 0.449702217   | 6.812951786  |
| N381  | -0.722506617 | 0.217200140   | 9.675563628  |

|      |              |               |               |
|------|--------------|---------------|---------------|
| N382 | 5.495506456  | -11.582998127 | 5.098927876   |
| N383 | 6.423195271  | -9.330180703  | 3.995965931   |
| N384 | 5.001266478  | -3.397006862  | 2.959790249   |
| N385 | 4.266694113  | -2.126111415  | 4.788522135   |
| N386 | 5.555978543  | -1.150612118  | 3.126722305   |
| N387 | 9.052408450  | -6.992660175  | 3.831087663   |
| N388 | -5.896247289 | -2.951592102  | -2.934772434  |
| N389 | -1.956822170 | -5.567008237  | -3.208904032  |
| N390 | -6.110385343 | -0.444831250  | -2.204670242  |
| N391 | -8.363501563 | 0.689349997   | -0.987831423  |
| N392 | -7.845231065 | 0.356975663   | 1.750084366   |
| N393 | -5.703639074 | 2.100453181   | 2.255260511   |
| N394 | -3.166235706 | 2.665644274   | -1.112256242  |
| N395 | -2.350668169 | 0.713453071   | -0.699381962  |
| N396 | -6.334796042 | 4.723180780   | 2.904263183   |
| N397 | -9.725037629 | 7.754509239   | 1.610299534   |
| N398 | -9.637798743 | 9.537425903   | 2.928528872   |
| N399 | 9.481284882  | 2.717940666   | 2.322013465   |
| N400 | 6.284797233  | 7.153070670   | -0.331767441  |
| N401 | 4.212966122  | 8.441623726   | -2.909197874  |
| N402 | 1.551118629  | 7.836582858   | -3.366730481  |
| N403 | -3.179867747 | 6.396243044   | -4.452867648  |
| N404 | -3.401241631 | 8.217332999   | -5.906352018  |
| N405 | -4.459785189 | 8.234648371   | -3.843935710  |
| N406 | 0.686688843  | 6.337063409   | -1.067191930  |
| N407 | 0.980569342  | 8.222204168   | 0.993859360   |
| N408 | -0.364544763 | 10.600911435  | 0.671624225   |
| N409 | -1.879686474 | 10.378157898  | -3.073862359  |
| N410 | -2.747362312 | 11.615185607  | 1.706258400   |
| N411 | 4.084313046  | -4.805400355  | -10.221928839 |
| N412 | 2.439349668  | -2.567963165  | -7.910727135  |
| N413 | 1.378520741  | 0.235096965   | -7.350259586  |
| N414 | 3.470312718  | 2.202554971   | -7.389331819  |
| N415 | -1.719068283 | -3.004371787  | -10.110623530 |
| N416 | -3.284860027 | -1.170247745  | -8.545728734  |
| N417 | 8.153035036  | -7.178046053  | -5.962064754  |
| N418 | 4.270851697  | -5.688492053  | -4.431793384  |
| N419 | 3.721119325  | -6.721743069  | -6.301402030  |
| N420 | 9.257191519  | -7.468204054  | -3.055817865  |
| N421 | 0.044931141  | 2.615561504   | -0.396728749  |
| N422 | 2.071763836  | -0.117376474  | 0.668649630   |
| N423 | 0.869576926  | 1.889097370   | -0.651220584  |
| N424 | 2.966170511  | -0.661055072  | 1.261394397   |
| O425 | -6.606378705 | -5.116909049  | 1.691645435   |
| O426 | -7.331690565 | -2.862394821  | 4.507647015   |
| O427 | -5.385276080 | -5.257751397  | 6.707661235   |
| O428 | -2.464918842 | -4.103071291  | 4.922546283   |
| O429 | -2.977750950 | -0.658802167  | 5.516632328   |
| O430 | -3.284197590 | -1.130810397  | 9.057311190   |
| O431 | -0.592924327 | -4.179032900  | 9.745723676   |
| O432 | 2.138210005  | -3.727343585  | 6.025091789   |
| O433 | 1.876822355  | 0.378769509   | 6.736846926   |
| O434 | 0.755476977  | 1.938695551   | 9.774246648   |
| O435 | 1.486676101  | -0.333582874  | 12.451170392  |
| O436 | 7.050056910  | -10.367700296 | 2.027033861   |
| O437 | 8.066760814  | -7.761967352  | 5.761627647   |
| O438 | 11.524358688 | -4.490554420  | 4.559578685   |
| O439 | -5.659224085 | -0.834849818  | 0.010005304   |
| O440 | -3.743213536 | -4.416888257  | -4.019298179  |
| O441 | -7.111530820 | 2.519599961   | -0.441531653  |
| O442 | -6.347995560 | 3.043350815   | -3.392164569  |
| O443 | -9.753698267 | 1.521957164   | 2.269731893   |
| O444 | -5.573427144 | 1.388678540   | 4.424793232   |
| O445 | -4.235169292 | 5.065387856   | 3.734820231   |
| O446 | -6.533394834 | 7.274697150   | 5.353584509   |
| O447 | 10.814008054 | -0.021588970  | 4.083678121   |
| O448 | 3.595890605  | 4.733845453   | 3.960855178   |
| O449 | 3.615464101  | 8.356859740   | -0.711769097  |
| O450 | 0.989056099  | 10.062348953  | -3.535952515  |
| O451 | -1.394458739 | 7.166096158   | -1.521180703  |
| O452 | -0.685182680 | 7.152555965   | 2.156118563   |
| O453 | 2.478893118  | 5.749618246   | 1.471599537   |
| O454 | 0.843491756  | 11.603805405  | 2.340626103   |
| O455 | -2.498325761 | 13.578259109  | 0.573600438   |
| O456 | -3.246406626 | 11.016402508  | -1.356112154  |
| O457 | -4.951760110 | 13.713508874  | 3.613939074   |
| O458 | -5.495887803 | 6.836419307   | -1.317685553  |
| O459 | 1.733238273  | -4.582274435  | -8.757336982  |
| O460 | -0.279069014 | -0.738554287  | -8.598439099  |
| O461 | 2.111353001  | 3.608669488   | -8.547148005  |

|                                 |      |                                     |               |              |
|---------------------------------|------|-------------------------------------|---------------|--------------|
|                                 | O462 | 5.680088544                         | 4.418525778   | -9.156119372 |
|                                 | O463 | -5.003993881                        | -2.622887049  | -8.909972599 |
|                                 | O464 | -1.518634175                        | -6.583868828  | -6.021784938 |
|                                 | O465 | 0.422635371                         | -5.787988565  | -6.782664941 |
|                                 | O466 | -3.913672341                        | 2.330761195   | -8.439343179 |
|                                 | O467 | 9.926395077                         | -5.398814867  | -3.693860794 |
|                                 | O468 | 12.669832428                        | -6.955118022  | -2.065185704 |
|                                 | O469 | 0.312073632                         | -6.276037336  | -1.404121026 |
|                                 | O470 | -0.239948225                        | -7.338287168  | 0.499208183  |
|                                 | O471 | 5.196795769                         | -10.901695693 | -3.323845338 |
|                                 | O472 | 2.936244615                         | -10.952489787 | -3.292565433 |
|                                 | O473 | 5.083054624                         | -5.770063898  | -1.355096029 |
|                                 | O474 | 5.047147299                         | -7.457148946  | 0.129070143  |
|                                 | O475 | 2.625932592                         | -6.108803662  | -2.151534066 |
|                                 | O476 | 8.935661239                         | -6.561014391  | 1.039734729  |
|                                 | O477 | 6.942087034                         | -4.555134340  | 0.433676884  |
|                                 | O478 | -4.403818703                        | 4.735880103   | -2.463120170 |
|                                 | O479 | 7.781632807                         | -10.412886944 | -2.520232035 |
|                                 | O480 | 7.513526418                         | -8.640742464  | -0.095515632 |
|                                 | S481 | 3.603716914                         | 4.974215816   | -2.563895719 |
|                                 | S482 | 1.974864327                         | 1.731525454   | -3.361355275 |
|                                 | S483 | 2.044469145                         | -3.349627503  | -3.728021624 |
|                                 | S484 | 3.847387654                         | 2.023413420   | -0.296230935 |
|                                 | S485 | 0.512266839                         | -0.899683761  | -1.508762249 |
|                                 | S486 | 3.994873780                         | -0.687258232  | -5.580814252 |
|                                 | S487 | 3.370309204                         | -3.447084877  | -0.332369125 |
|                                 | S488 | 5.661929467                         | 1.722366271   | -3.196876885 |
|                                 | S489 | 5.674523115                         | -3.060049148  | -3.178038152 |
|                                 | S490 | 6.110824631                         | -0.897510627  | -0.199489127 |
|                                 | end  |                                     |               |              |
| <b>transition state (S=3/2)</b> |      | <b>bm522nnhtrha335te_1_53271.78</b> |               |              |
| Fe( 139) -2.183                 | C1   | -7.765154289                        | -5.375438049  | 1.305712183  |
| Fe( 140) -0.075                 | C2   | -8.110567579                        | -6.533825822  | 0.362776671  |
| Fe( 141) -2.401                 | C3   | -8.644884664                        | -3.475699095  | 2.589977592  |
| Fe( 142) 2.249                  | C4   | -7.997509215                        | -3.736955696  | 3.947769104  |
| Fe( 143) 2.552                  | C5   | -7.576431093                        | -5.332223601  | 5.754778083  |
| Fe( 144) 2.100                  | C6   | -6.050752932                        | -5.447782777  | 5.687817467  |
| Fe( 145) 0.586                  | C7   | -4.073801799                        | -5.777018673  | 4.295438868  |
|                                 | C8   | -3.508644339                        | -4.354603003  | 4.323110860  |
|                                 | C9   | -3.870623351                        | -2.013554016  | 3.700162840  |
|                                 | C10  | -3.875687072                        | -1.412116716  | 5.113190998  |
|                                 | C11  | -4.939190097                        | -1.240735306  | 7.274810620  |
|                                 | C12  | -3.883590798                        | -1.821439399  | 8.226716636  |
|                                 | C13  | -2.899688013                        | -3.861353809  | 9.167319896  |
|                                 | C14  | -1.425548771                        | -4.130072435  | 8.834837835  |
|                                 | C15  | 0.222614527                         | -4.719182201  | 7.101258278  |
|                                 | C16  | 0.955559311                         | -3.588049594  | 6.377989209  |
|                                 | C17  | 0.684972984                         | -1.308189188  | 5.426030167  |
|                                 | C18  | 0.776235648                         | -0.097679425  | 6.369172665  |
|                                 | C19  | -0.119497066                        | -1.067575988  | 4.125477301  |
|                                 | C20  | 0.265891066                         | 0.264075691   | 3.474147921  |
|                                 | C21  | 0.067285076                         | -2.238149687  | 3.151442262  |
|                                 | C22  | -0.409339144                        | 1.617262296   | 7.659989668  |
|                                 | C23  | -0.056254705                        | 1.270498028   | 9.117581196  |
|                                 | C24  | -1.746888154                        | 2.380970457   | 7.519153437  |
|                                 | C25  | -1.830405068                        | 3.544007705   | 8.513404786  |
|                                 | C26  | -1.922506602                        | 2.892407615   | 6.082730309  |
|                                 | C27  | -0.454972340                        | -0.117724861  | 11.062872382 |
|                                 | C28  | 1.008413567                         | -0.397709516  | 11.341557555 |
|                                 | C29  | 5.880553298                         | -11.643888768 | 3.697704297  |
|                                 | C30  | 6.518644737                         | -10.365260745 | 3.167635738  |
|                                 | C31  | 6.814191679                         | -7.952944034  | 3.691409930  |
|                                 | C32  | 8.038342962                         | -7.552934049  | 4.534794894  |
|                                 | C33  | 5.629375038                         | -7.005546982  | 3.938598007  |
|                                 | C34  | 5.947931663                         | -5.561649169  | 3.562815480  |
|                                 | C35  | 4.689913145                         | -4.700165649  | 3.488024153  |
|                                 | C36  | 4.914005976                         | -2.212089249  | 3.585311612  |
|                                 | C37  | 10.275151785                        | -6.548466704  | 4.465367230  |
|                                 | C38  | 10.451277229                        | -5.046587935  | 4.463646557  |
|                                 | C39  | -5.371875296                        | -2.679193311  | -1.583981080 |
|                                 | C40  | -5.733354413                        | -1.243826871  | -1.157003250 |
|                                 | C41  | -3.834667787                        | -2.819362408  | -1.516143955 |
|                                 | C42  | -3.272848893                        | -4.250939401  | -1.632440605 |
|                                 | C43  | -3.006297067                        | -4.742011179  | -3.055753742 |
|                                 | C44  | -6.192092099                        | 0.996731108   | -2.071502160 |
|                                 | C45  | -7.273264903                        | 1.470320999   | -1.089835704 |
|                                 | C46  | -6.362488299                        | 1.602472293   | -3.470334761 |
|                                 | C47  | -9.426629513                        | 0.975891350   | -0.030078575 |
|                                 | C48  | -9.019701440                        | 0.975407587   | 1.446699121  |
|                                 | C49  | -7.312123451                        | 0.410973245   | 3.11177264   |

|      |               |              |              |
|------|---------------|--------------|--------------|
| C50  | -6.125589602  | 1.350717905  | 3.329215843  |
| C51  | -4.617109361  | 3.050442347  | 2.424343074  |
| C52  | -5.049146750  | 4.362637905  | 3.121482407  |
| C53  | -4.022838099  | 3.481580069  | 1.075010308  |
| C54  | -3.383492731  | 2.423355727  | 0.238036609  |
| C55  | -2.856706150  | 1.180910935  | 0.49377614   |
| C56  | -2.531723084  | 1.615336180  | -1.664090002 |
| C57  | -6.852089941  | 6.036809086  | 3.271331983  |
| C58  | -6.735520442  | 6.207202683  | 4.784905737  |
| C59  | -8.334340729  | 6.099312491  | 2.830620642  |
| C60  | -8.941337613  | 7.465873212  | 2.699836110  |
| C61  | -8.877639402  | 8.568844414  | 3.529307864  |
| C62  | -10.154566247 | 9.000349643  | 1.770672420  |
| C63  | 9.249309676   | 1.670903863  | 3.354513895  |
| C64  | 10.287821056  | 0.577586184  | 3.180666205  |
| C65  | 7.857801019   | 1.014169280  | 3.191221352  |
| C66  | 6.721667614   | 1.981535619  | 3.423634019  |
| C67  | 6.141701573   | 2.148231925  | 4.693441370  |
| C68  | 6.219549702   | 2.760628680  | 2.365434696  |
| C69  | 5.093858797   | 3.053455048  | 4.902763291  |
| C70  | 5.193575791   | 3.683839982  | 2.562899746  |
| C71  | 4.623572682   | 3.823116440  | 3.830851302  |
| C72  | 5.375039907   | 6.834190841  | -1.418234200 |
| C73  | 4.316445691   | 7.930976665  | -1.624514208 |
| C74  | 4.709503197   | 5.495004780  | -1.107670242 |
| C75  | 3.315640133   | 9.525404069  | -3.223189974 |
| C76  | 1.837922500   | 9.156585960  | -3.381726700 |
| C77  | 0.211207855   | 7.263667141  | -3.330758315 |
| C78  | -0.245223038  | 6.921155354  | -1.888161756 |
| C79  | 0.235738635   | 6.018222282  | -4.246268809 |
| C80  | -1.019466944  | 5.143356896  | -4.354054754 |
| C81  | -2.161195376  | 5.686860372  | -5.230069296 |
| C82  | -3.692638472  | 7.596095244  | -4.752440546 |
| C83  | 0.303477070   | 5.974786580  | 0.307119510  |
| C84  | 0.126156815   | 7.186632984  | 1.232368992  |
| C85  | 1.331581715   | 5.028781547  | 0.966228882  |
| C86  | 1.189297720   | 9.254185263  | 1.993394249  |
| C87  | 0.549632765   | 10.599080930 | 1.684826492  |
| C88  | -0.845724593  | 11.867492128 | 0.142963590  |
| C89  | -2.124273887  | 12.424152012 | 0.814186347  |
| C90  | -0.986449490  | 11.876848757 | -1.381262378 |
| C91  | -2.142329919  | 11.035598360 | -1.908260009 |
| C92  | -4.070232047  | 11.949879588 | 2.224325989  |
| C93  | -3.986741289  | 13.057747907 | 3.266526334  |
| C94  | -4.733290703  | 10.687488908 | 2.840890999  |
| C95  | -4.973716958  | 9.613025404  | 1.805593607  |
| C96  | -6.144939047  | 9.621736745  | 1.033350795  |
| C97  | -4.015682688  | 8.620561838  | 1.544158218  |
| C98  | -6.346495015  | 8.686379488  | 0.017152407  |
| C99  | -4.188972060  | 7.690269197  | 0.514610652  |
| C100 | -5.354799808  | 7.740434245  | -0.243662708 |
| C101 | 4.069554073   | -4.002988757 | -8.999758444 |
| C102 | 2.640565921   | -3.738034108 | -8.558588837 |
| C103 | 1.182570677   | -2.186889090 | -7.278347182 |
| C104 | 0.683884621   | -0.832619361 | -7.796029694 |
| C105 | 1.099681062   | 1.592285733  | -7.746822211 |
| C106 | 2.287040411   | 2.535213909  | -7.931480477 |
| C107 | 4.576903171   | 3.165106559  | -7.422048478 |
| C108 | 5.098528758   | 3.400178370  | -8.826141563 |
| C109 | -2.765613074  | -3.494527509 | -9.191582819 |
| C110 | -3.792338946  | -2.400014333 | -8.874557064 |
| C111 | -2.281196312  | -4.159714482 | -7.883708455 |
| C112 | -1.556360159  | -5.487380405 | -8.170583394 |
| C113 | -0.894647134  | -6.013376958 | -6.916821745 |
| C114 | -4.189702940  | -0.080132341 | -8.209213960 |
| C115 | -3.712446880  | 1.202187542  | -8.861246874 |
| C116 | -4.543311006  | 0.048813906  | -6.706908412 |
| C117 | -3.311270798  | 0.034022623  | -5.843514189 |
| C118 | -2.560252773  | 1.203828173  | -5.632741470 |
| C119 | -2.822147950  | -1.183788571 | -5.342235975 |
| C120 | -1.317361962  | 1.137367386  | -4.993641510 |
| C121 | -1.582723728  | -1.248563744 | -4.698399429 |
| C122 | -0.814798389  | -0.089114301 | -4.548169966 |
| C123 | 7.947365004   | -6.283873150 | -4.799636534 |
| C124 | 9.113400611   | -6.334529164 | -3.799992426 |
| C125 | 6.625689179   | -6.602587048 | -4.084192749 |
| C126 | 5.376623479   | -6.426776191 | -4.884863053 |
| C127 | 5.038818107   | -7.059368996 | -6.063557557 |
| C128 | 3.287825863   | -5.931683287 | -5.311236233 |
| C129 | 10.317821621  | -7.524331263 | -2.070228121 |

|       |              |               |              |
|-------|--------------|---------------|--------------|
| C130  | 11.676814123 | -7.310024631  | -2.700193924 |
| C131  | 0.619752248  | -6.900509921  | -0.246889472 |
| C132  | 2.108006870  | -6.924548850  | 0.083096189  |
| C133  | 3.037354369  | -7.074925131  | -1.159536770 |
| C134  | 2.972755872  | -8.533194175  | -1.686629886 |
| C135  | 4.010419423  | -8.885357833  | -2.754675708 |
| C136  | 4.035072994  | -10.377631986 | -3.151008881 |
| C137  | 4.486430145  | -6.777037288  | -0.739135127 |
| C138  | 3.551667163  | -0.716069300  | -2.233699500 |
| Fe139 | 3.788926155  | -1.987135748  | -3.776265416 |
| Fe140 | 2.180694988  | 0.769955084   | -1.314695122 |
| Fe141 | 4.960035669  | 0.445525030   | -1.471162369 |
| Fe142 | 3.838827932  | 0.514642164   | -3.748884198 |
| Fe143 | 3.812770543  | 2.702692289   | -2.360976669 |
| Fe144 | 4.724632054  | -2.086113882  | -1.427255266 |
| Fe145 | 2.196930375  | -2.341194654  | -1.804580808 |
| H146  | -6.314539486 | -7.502374702  | 0.397887219  |
| H147  | -6.495533156 | -6.516751244  | -0.890015071 |
| H148  | -9.754032398 | -4.844181224  | 1.380612163  |
| H149  | -8.825771516 | -6.174017538  | -0.394614133 |
| H150  | -8.657341915 | -7.279602853  | 0.965576393  |
| H151  | -8.009084250 | -2.738917485  | 2.077377983  |
| H152  | -8.768376370 | -5.634740306  | 3.989699412  |
| H153  | -9.627443121 | -3.014057894  | 2.758276720  |
| H154  | -7.991021619 | -6.296494611  | 6.076705305  |
| H155  | -6.114010414 | -5.862737450  | 3.668142897  |
| H156  | -7.800298449 | -4.589253520  | 6.531360593  |
| H157  | -2.862211495 | -1.866339608  | 3.293195473  |
| H158  | -5.075602836 | -3.700850419  | 3.155929909  |
| H159  | -3.843310188 | -6.243988333  | 3.328345912  |
| H160  | -4.780317564 | -0.154572791  | 7.247376484  |
| H161  | -5.678074256 | -2.319039416  | 5.557063485  |
| H162  | -3.569270091 | -6.346541067  | 5.084877619  |
| H163  | -4.579757911 | -1.462864411  | 3.066785757  |
| H164  | -4.284805215 | -3.725453526  | 7.541441124  |
| H165  | -5.934940530 | -1.440351093  | 7.695016458  |
| H166  | -0.227372961 | -3.194132634  | 3.607823199  |
| H167  | -0.561667060 | -2.090941897  | 2.259028181  |
| H168  | 1.110265721  | -2.305639401  | 2.806609841  |
| H169  | -1.179972665 | -1.012605985  | 4.410997876  |
| H170  | -3.372362885 | -4.833864071  | 9.369848894  |
| H171  | -1.923848675 | 2.075967288   | 5.348073976  |
| H172  | -1.481088710 | -0.250264234  | 9.198353144  |
| H173  | -1.794645404 | 3.206279879   | 9.558952801  |
| H174  | 1.319135111  | 0.264470036   | 3.161243069  |
| H175  | 0.095362477  | 1.117771789   | 4.145814781  |
| H176  | 9.330325993  | 2.035600180   | 4.396409982  |
| H177  | -2.877138392 | 3.428228975   | 5.980723001  |
| H178  | -2.773616330 | 4.089898039   | 8.364867647  |
| H179  | -1.110821130 | 3.592511446   | 5.824467660  |
| H180  | -0.999729641 | 4.250618167   | 8.356902914  |
| H181  | -2.565206159 | 1.672434186   | 7.742789033  |
| H182  | 0.411381762  | 2.272448183   | 7.330839116  |
| H183  | -1.287010370 | 0.084616626   | 6.428642772  |
| H184  | -0.340265045 | 0.427042419   | 2.570150885  |
| H185  | 1.661692555  | 4.292634301   | 0.219144681  |
| H186  | 0.811361349  | 4.494955437   | 1.774499782  |
| H187  | 2.698863764  | 5.365260275   | 2.346061930  |
| H188  | 3.227445139  | 4.685293906   | 4.869207412  |
| H189  | 4.809823274  | 4.274284345   | 1.730467551  |
| H190  | 6.623417567  | 2.624937191   | 1.359533178  |
| H191  | 6.504031350  | 1.554030436   | 5.537504643  |
| H192  | -0.765105349 | -2.523053173  | 6.416171610  |
| H193  | 0.209753420  | -5.586031514  | 6.424364956  |
| H194  | 0.817265588  | -4.989213447  | 7.983777453  |
| H195  | -1.868787674 | -4.441783141  | 6.820930555  |
| H196  | -2.902052707 | -3.275224892  | 10.094255167 |
| H197  | 4.641725245  | 3.155698909   | 5.893262023  |
| H198  | 1.725393934  | -1.516073563  | 5.150829223  |
| H199  | -0.799211586 | 0.669135480   | 11.753562624 |
| H200  | -1.012138651 | -1.038718666  | 11.294867971 |
| H201  | 1.602910301  | -0.741515351  | 10.463161177 |
| H202  | 11.156748963 | -7.017581561  | 4.001545652  |
| H203  | -1.764065913 | -5.956253783  | -4.137498601 |
| H204  | 1.263168321  | -6.079412381  | -1.871406096 |
| H205  | -2.290873396 | -6.233948155  | -8.506344096 |
| H206  | -0.812868541 | -5.350189640  | -8.968651964 |
| H207  | -3.135182470 | -4.355714054  | -7.216925511 |
| H208  | -3.134840185 | 1.047684550   | -9.803377648 |
| H209  | -3.353763787 | -4.244154481  | -9.743312478 |

|      |               |              |               |
|------|---------------|--------------|---------------|
| H210 | -3.389847538  | -2.183204293 | -2.299451300  |
| H211 | -3.966522828  | -4.972206378 | -1.166719646  |
| H212 | -2.282372582  | -1.028517127 | -8.479912302  |
| H213 | -5.135633213  | -0.313084365 | -8.740488467  |
| H214 | -1.046093101  | -2.408608847 | -9.616538486  |
| H215 | -1.315856198  | -5.806118466 | -2.442448981  |
| H216 | -1.621503525  | -3.458066714 | -7.349768434  |
| H217 | -1.209096111  | -3.790216387 | -10.497600924 |
| H218 | -6.781782273  | -3.458508297 | -2.877451644  |
| H219 | -3.515834792  | -2.411354958 | -0.545700766  |
| H220 | 0.808295955   | -5.309315502 | -7.589629038  |
| H221 | -2.342108554  | -4.316209601 | -1.050657717  |
| H222 | -3.850640568  | 2.600706955  | 3.070855155   |
| H223 | -2.815290634  | 0.599227228  | 1.406164316   |
| H224 | -8.116204146  | 0.753058478  | 3.777919305   |
| H225 | -7.268449748  | -0.067906889 | 1.033147720   |
| H226 | -6.956119929  | 4.071257828  | 2.424077562   |
| H227 | -8.353601011  | 8.752718160  | 4.460042425   |
| H228 | -6.881945658  | 5.256413766  | 5.354423675   |
| H229 | -8.935838940  | 5.464267579  | 3.505084713   |
| H230 | -6.271111356  | 6.832814624  | 2.779811869   |
| H231 | -10.804819243 | 9.557000377  | 1.101592480   |
| H232 | -3.270830092  | 4.257668089  | 1.291033344   |
| H233 | -4.814398870  | 3.963337164  | 0.479152975   |
| H234 | -9.814423516  | 10.473781516 | 3.270476606   |
| H235 | -8.398786357  | 5.637992272  | 1.832036509   |
| H236 | -6.198893894  | 2.044154096  | 1.364692044   |
| H237 | -7.018229055  | -0.590565063 | 3.458801764   |
| H238 | -9.852698966  | 1.969318103  | -0.229021057  |
| H239 | -2.212867099  | 1.512991589  | -2.698916648  |
| H240 | -10.226658469 | 0.236801325  | -0.167979370  |
| H241 | 10.291562105  | 3.258513962  | 2.589061163   |
| H242 | 8.681278370   | 3.351532646  | 2.335118495   |
| H243 | 1.567399407   | 5.993465726  | -1.439193507  |
| H244 | -0.669805515  | 5.463617319  | 0.284016562   |
| H245 | 1.739267729   | 8.073105467  | 0.328338298   |
| H246 | -3.517597467  | 3.507741537  | -1.628092283  |
| H247 | -5.138886746  | 4.168539041  | -2.809377005  |
| H248 | -6.707578041  | 3.383705912  | -4.215517033  |
| H249 | -4.814486065  | 5.403863038  | -1.854776174  |
| H250 | -5.533366588  | 1.244754925  | -4.103030986  |
| H251 | -7.315054550  | 1.269283311  | -3.910210502  |
| H252 | -0.032186294  | 11.587275223 | -1.843262588  |
| H253 | -1.193044349  | 12.917529488 | -1.676943201  |
| H254 | -0.906429436  | 10.214100955 | -3.355995698  |
| H255 | -2.594191860  | 9.704693754  | -3.356743535  |
| H256 | -3.774527424  | 9.154990088  | -6.078556436  |
| H257 | -2.655965108  | 4.858785212  | -5.760050456  |
| H258 | -7.268867618  | 8.698675836  | -0.569320385  |
| H259 | -3.109567824  | 8.550923086  | 2.151349436   |
| H260 | -4.670026746  | 7.793924987  | -2.949683274  |
| H261 | 1.056671464   | 5.372065907  | -3.895619970  |
| H262 | 2.341496211   | 7.189581338  | -3.256105415  |
| H263 | -1.406465008  | 4.879829268  | -3.357331092  |
| H264 | -8.384405222  | -0.192976452 | -1.499922840  |
| H265 | 3.650881274   | 9.986836257  | -4.161551367  |
| H266 | -6.117416330  | -0.960011826 | -3.092879797  |
| H267 | 0.526534394   | 6.358009179  | -5.253755992  |
| H268 | -3.403982847  | 6.967077988  | 0.290273304   |
| H269 | 3.355322453   | 10.292667541 | -2.436462405  |
| H270 | -3.069211739  | 7.710261384  | -6.710593704  |
| H271 | -5.122120402  | 8.939838155  | -4.169303353  |
| H272 | -5.212521069  | -3.535895897 | -3.449673645  |
| H273 | -5.805831846  | -3.337527763 | -0.808280666  |
| H274 | -6.918460465  | 10.368507760 | 1.227509087   |
| H275 | -5.256800852  | 1.375533774  | -1.635399955  |
| H276 | -0.491839088  | 8.018655265  | -3.696552700  |
| H277 | -1.743769823  | 6.354871526  | -5.994165846  |
| H278 | -0.691157471  | 4.200195031  | -4.813377462  |
| H279 | -3.602707293  | 5.874297952  | -3.671170267  |
| H280 | 0.788234893   | 8.909231525  | 2.958211571   |
| H281 | -0.455309153  | 9.749985058  | 0.119433047   |
| H282 | -0.079009077  | 12.614267456 | 0.401382296   |
| H283 | 2.266157060   | 9.432328422  | 2.114138492   |
| H284 | -2.440109369  | 10.648721901 | 1.743419030   |
| H285 | 4.593338211   | -3.050345342 | -9.166160798  |
| H286 | 4.559762030   | -4.490269164 | -8.129996245  |
| H287 | 7.921794339   | -5.243573634 | -5.156272716  |
| H288 | 5.037939271   | -5.149208537 | -10.378269526 |
| H289 | 3.495369743   | -5.620745101 | -10.094382606 |

|      |              |               |              |
|------|--------------|---------------|--------------|
| H290 | 5.500800722  | 4.750034714   | -0.959183399 |
| H291 | 5.740135683  | 7.422384144   | 0.503899709  |
| H292 | 4.830224013  | 8.069860294   | -3.611986374 |
| H293 | 4.109773114  | 5.575528644   | -0.190122302 |
| H294 | 6.816734836  | 8.023898797   | -0.569876320 |
| H295 | 5.408036740  | 2.757126973   | -6.825291639 |
| H296 | 5.971745773  | 6.726048681   | -2.336923301 |
| H297 | 5.325795916  | -7.076011066  | 4.996332522  |
| H298 | 7.074822322  | -7.930812400  | 2.625406416  |
| H299 | 3.617867618  | 1.349372240   | -6.838515116 |
| H300 | 5.182737150  | -0.206204307  | 3.358020754  |
| H301 | 0.551551600  | 1.561136512   | -8.696354271 |
| H302 | -1.206114398 | -2.204989820  | -4.328703836 |
| H303 | 0.436307254  | 2.075733894   | -7.008919210 |
| H304 | 4.230915111  | -4.589679718  | 4.477590116  |
| H305 | 2.087992947  | 0.037467793   | -6.607273629 |
| H306 | 3.939926272  | -5.167539019  | 2.831003258  |
| H307 | 4.790711082  | -7.372239483  | 3.325145909  |
| H308 | 6.437791883  | -5.538805735  | 2.578347148  |
| H309 | 6.647205804  | -5.111672160  | 4.285194431  |
| H310 | -5.204725609 | -0.790741501  | -6.447972258 |
| H311 | 5.949016444  | -9.524256765  | 4.890685574  |
| H312 | 4.978598480  | -11.806010154 | 3.088614419  |
| H313 | 0.166290585  | -0.128954192  | -4.075420917 |
| H314 | 6.267210042  | -11.896451826 | 5.705425821  |
| H315 | 4.704895647  | -12.175565664 | 5.301690394  |
| H316 | 5.522171241  | -3.390419707  | 2.055196067  |
| H317 | -0.719057496 | 2.038778698   | -4.845782867 |
| H318 | -3.408264127 | -2.096892114  | -5.466136190 |
| H319 | 7.668066623  | -9.926545931  | -1.672446472 |
| H320 | 6.651652848  | -7.651457373  | -3.742068996 |
| H321 | 6.635022541  | -8.166305208  | -0.113372338 |
| H322 | 6.814340300  | -10.536526628 | -2.819059273 |
| H323 | 4.891156528  | 2.573135882   | -9.546918655 |
| H324 | 6.326920173  | -5.028683997  | -0.205894773 |
| H325 | 2.302713932  | -7.718973645  | 0.813530587  |
| H326 | 3.258012980  | -2.008775141  | -7.660054318 |
| H327 | 3.116242810  | -9.192308630  | -0.816178747 |
| H328 | 3.153747058  | -7.080889127  | -7.077644950 |
| H329 | 2.272712676  | -5.562961971  | -5.246107621 |
| H330 | 6.574485672  | -12.468250094 | 3.459439919  |
| H331 | 5.880734315  | -1.158462749  | 2.107131678  |
| H332 | 8.325881617  | -5.808774079  | 0.818945198  |
| H333 | 7.230820130  | -3.775870301  | -0.086359238 |
| H334 | 8.965687474  | -6.865670499  | 2.795126319  |
| H335 | 3.590633039  | -2.790357199  | 5.108833605  |
| H336 | 3.803094314  | -8.305846511  | -3.667240639 |
| H337 | 5.017865946  | -8.604040025  | -2.419066942 |
| H338 | 1.958993221  | -8.723024539  | -2.071450466 |
| H339 | 1.314328219  | -2.155525714  | -6.184839349 |
| H340 | -2.936741582 | 2.157862112   | -6.009822540 |
| H341 | -5.110810967 | 0.984361140   | -6.587765647 |
| H342 | 2.320057367  | -5.958620997  | 0.571615174  |
| H343 | 8.499783310  | -7.337713323  | 0.586388341  |
| H344 | 7.398326329  | -9.261602379  | 0.666813998  |
| H345 | 4.227077501  | -1.184032508  | 5.203124644  |
| H346 | 5.612219828  | -7.715689439  | -6.705741804 |
| H347 | 6.555298094  | -5.991312621  | -3.176689626 |
| H348 | 0.436829725  | -2.943451849  | -7.529110145 |
| H349 | 4.286674013  | 4.129849657   | -6.978245477 |
| H350 | 7.795305217  | 0.178357702   | 3.902743373  |
| H351 | 7.790432765  | 0.595102427   | 2.174404045  |
| H352 | 9.040401343  | -6.880663407  | -6.429186629 |
| H353 | 8.287892112  | -8.122072440  | -5.673119814 |
| H354 | 10.313823906 | -8.534247829  | -1.631651709 |
| H355 | 8.598380778  | -8.250133614  | -3.102808267 |
| H356 | 11.726911471 | -7.552326300  | -3.789584939 |
| H357 | 10.172841723 | -6.808540435  | -1.245533613 |
| H358 | 10.550659198 | 0.357415347   | 2.117361974  |
| H359 | -2.977559710 | 13.214144245  | 3.715024719  |
| H360 | 10.239127152 | -6.867650268  | 5.521886472  |
| H361 | 9.504150812  | -4.457368380  | 4.402946436  |
| H362 | -4.704989390 | 12.319327068  | 1.401590493  |
| H363 | -4.097027487 | 10.307720063  | 3.655722646  |
| H364 | -5.684236397 | 11.007589295  | 3.290652402  |
| H365 | 1.149274284  | -3.251522099  | -1.212129211 |
| H366 | 3.874154858  | -0.628871541  | 0.879126806  |
| H367 | -6.443458558 | 6.822488034   | -1.571883390 |
| H368 | 0.844519285  | -0.792657375  | 0.059513446  |
| H369 | -1.758140267 | -0.131847133  | -0.830364750 |

|       |              |               |               |
|-------|--------------|---------------|---------------|
| M0370 | 3.820674421  | -4.400670593  | -2.510054501  |
| N371  | -6.994078258 | -7.184952011  | -0.297631946  |
| N372  | -8.832099423 | -4.663407654  | 1.770814310   |
| N373  | -8.201427711 | -4.958843346  | 4.496085197   |
| N374  | -5.516288025 | -5.807597493  | 4.494325994   |
| N375  | -4.236589062 | -3.420142048  | 3.659687427   |
| N376  | -4.886337652 | -1.789756169  | 5.930592152   |
| N377  | -3.697679567 | -3.166276344  | 8.166709718   |
| N378  | -1.130358034 | -4.405948108  | 7.530712421   |
| N379  | 0.216129625  | -2.481673848  | 6.147231433   |
| N380  | -0.400245223 | 0.429970211   | 6.804671783   |
| N381  | -0.703896193 | 0.214808293   | 9.673378388   |
| N382  | 5.501333709  | -11.564834139 | 5.114859888   |
| N383  | 6.416583970  | -9.313734041  | 4.002669145   |
| N384  | 5.016670023  | -3.379676593  | 2.945877724   |
| N385  | 4.261935035  | -2.096191192  | 4.757404474   |
| N386  | 5.521900135  | -1.121208134  | 3.071202570   |
| N387  | 9.048109364  | -6.983407252  | 3.829629902   |
| N388  | -5.894384706 | -2.954059735  | -2.928045818  |
| N389  | -1.957719166 | -5.570963643  | -3.206711794  |
| N390  | -6.110250597 | -0.448729730  | -2.193941789  |
| N391  | -8.364148475 | 0.679199043   | -0.975683989  |
| N392  | -7.849160212 | 0.355720211   | 1.765373038   |
| N393  | -5.707752436 | 2.098769018   | 2.261656310   |
| N394  | -3.167647570 | 2.658328090   | -1.113636069  |
| N395  | -2.347580926 | 0.705477410   | -0.700108082  |
| N396  | -6.337087673 | 4.726052932   | 2.895951984   |
| N397  | -9.742297176 | 7.748958937   | 1.604335294   |
| N398  | -9.651818749 | 9.533256075   | 2.920316287   |
| N399  | 9.471704233  | 2.701030985   | 2.336746853   |
| N400  | 6.295087437  | 7.177974491   | -0.322683594  |
| N401  | 4.213401845  | 8.433604497   | -2.890389840  |
| N402  | 1.553255053  | 7.837606215   | -3.355133125  |
| N403  | -3.180192743 | 6.402782108   | -4.455845549  |
| N404  | -3.390763516 | 8.231573510   | -5.901886424  |
| N405  | -4.458652054 | 8.241565799   | -3.844864232  |
| N406  | 0.672690840  | 6.339258533   | -1.063242061  |
| N407  | 0.975285350  | 8.225694942   | 0.992886434   |
| N408  | -0.366739074 | 10.603679127  | 0.669815115   |
| N409  | -1.880158352 | 10.369712246  | -3.066777043  |
| N410  | -2.748798077 | 11.617062798  | 1.708178180   |
| N411  | 4.089436573  | -4.797606324  | -10.229126469 |
| N412  | 2.441656050  | -2.575035560  | -7.902723398  |
| N413  | 1.391199423  | 0.227411219   | -7.347740821  |
| N414  | 3.483379836  | 2.207344735   | -7.382138857  |
| N415  | -1.727315922 | -3.001537640  | -10.105302807 |
| N416  | -3.295021554 | -1.175332326  | -8.536554033  |
| N417  | 8.164065927  | -7.149774071  | -5.972699661  |
| N418  | 4.267955225  | -5.710812556  | -4.433977899  |
| N419  | 3.723931030  | -6.732893188  | -6.311241621  |
| N420  | 9.250444317  | -7.462057001  | -3.051707390  |
| N421  | 0.041216970  | 2.554300068   | -0.373188743  |
| N422  | 2.051098204  | -0.187012382  | 0.506305290   |
| N423  | 0.895257676  | 1.903740417   | -0.720266252  |
| N424  | 2.873204461  | -0.748032321  | 1.221456382   |
| O425  | -6.604695967 | -5.120570801  | 1.674810467   |
| O426  | -7.322868085 | -2.853574092  | 4.505169681   |
| O427  | -5.361962340 | -5.234025116  | 6.699362273   |
| O428  | -2.460751648 | -4.072543071  | 4.924424894   |
| O429  | -2.991332102 | -0.621822792  | 5.478471360   |
| O430  | -3.283269873 | -1.087803085  | 9.031790367   |
| O431  | -0.582028888 | -4.131815045  | 9.740615101   |
| O432  | 2.146172402  | -3.736449664  | 6.038383661   |
| O433  | 1.881840102  | 0.351566405   | 6.708454224   |
| O434  | 0.784735961  | 1.927994354   | 9.752908924   |
| O435  | 1.503415304  | -0.315496946  | 12.455315518  |
| O436  | 7.051592762  | -10.356475988 | 2.039176156   |
| O437  | 8.059628809  | -7.738555927  | 5.764360755   |
| O438  | 11.538125834 | -4.496326421  | 4.544040487   |
| O439  | -5.663893229 | -0.842476940  | 0.020924876   |
| O440  | -3.739724598 | -4.414475483  | -4.017581261  |
| O441  | -7.119486791 | 2.515599670   | -0.432860986  |
| O442  | -6.345541356 | 3.040930919   | -3.378990722  |
| O443  | -9.760987045 | 1.518660314   | 2.276887720   |
| O444  | -5.590663367 | 1.415283973   | 4.440418676   |
| O445  | -4.241653840 | 5.062381748   | 3.740449015   |
| O446  | -6.551259921 | 7.270945948   | 5.350040678   |
| O447  | 10.798811587 | -0.036980129  | 4.105335921   |
| O448  | 3.584219261  | 4.724555080   | 3.962790693   |
| O449  | 3.604006236  | 8.349608498   | -0.695674967  |



|                                    |      |              |                                |              |
|------------------------------------|------|--------------|--------------------------------|--------------|
|                                    | O450 | 0.997918621  | 10.064262238                   | -3.531120175 |
|                                    | O451 | -1.404263384 | 7.173996868                    | -1.526226979 |
|                                    | O452 | -0.691364920 | 7.164061741                    | 2.161530693  |
|                                    | O453 | 2.461345896  | 5.742404132                    | 1.474212032  |
|                                    | O454 | 0.846553058  | 11.609815524                   | 2.332940958  |
|                                    | O455 | -2.502521452 | 13.579497950                   | 0.573897789  |
|                                    | O456 | -3.251521935 | 11.016195690                   | -1.355893331 |
|                                    | O457 | -4.954721209 | 13.712254191                   | 3.618090873  |
|                                    | O458 | -5.499635285 | 6.841397596                    | -1.320486793 |
|                                    | O459 | 1.736090113  | -4.581930349                   | -8.768484594 |
|                                    | O460 | -0.285370418 | -0.737561710                   | -8.577646488 |
|                                    | O461 | 2.114609014  | 3.607415596                    | -8.535240014 |
|                                    | O462 | 5.731770168  | 4.390629965                    | -9.151144031 |
|                                    | O463 | -5.012821158 | -2.628384214                   | -8.905199663 |
|                                    | O464 | -1.511212780 | -6.580321290                   | -6.021210359 |
|                                    | O465 | 0.428152779  | -5.786824540                   | -6.789577280 |
|                                    | O466 | -3.964290949 | 2.326671207                    | -8.450617700 |
|                                    | O467 | 9.928516894  | -5.397074352                   | -3.695286672 |
|                                    | O468 | 12.670065908 | -6.965180212                   | -2.077020263 |
|                                    | O469 | 0.310357228  | -6.290151639                   | -1.398084511 |
|                                    | O470 | -0.242712511 | -7.350934660                   | 0.505282758  |
|                                    | O471 | 5.186771960  | -10.912803985                  | -3.329895526 |
|                                    | O472 | 2.926293226  | -10.963023569                  | -3.304501822 |
|                                    | O473 | 5.079488004  | -5.790088976                   | -1.356287234 |
|                                    | O474 | 5.043576222  | -7.471872242                   | 0.133060329  |
|                                    | O475 | 2.623835993  | -6.129350251                   | -2.148959556 |
|                                    | O476 | 8.929495830  | -6.559774604                   | 1.040161692  |
|                                    | O477 | 6.941328720  | -4.560003208                   | 0.417199718  |
|                                    | O478 | -4.402537412 | 4.742844732                    | -2.464756038 |
|                                    | O479 | 7.765400456  | -10.416547889                  | -2.519298956 |
|                                    | O480 | 7.510294089  | -8.637344330                   | -0.094827229 |
|                                    | S481 | 3.596199779  | 4.948418630                    | -2.488651026 |
|                                    | S482 | 2.045752813  | 1.776809791                    | -3.426048369 |
|                                    | S483 | 2.034776296  | -3.381873737                   | -3.724955400 |
|                                    | S484 | 3.858041632  | 1.982407017                    | -0.297934333 |
|                                    | S485 | 0.527705657  | -0.894522889                   | -1.462477336 |
|                                    | S486 | 3.980195311  | -0.692007103                   | -5.574509862 |
|                                    | S487 | 3.363452568  | -3.479522608                   | -0.342821683 |
|                                    | S488 | 5.641561212  | 1.703053228                    | -3.193392926 |
|                                    | S489 | 5.659516452  | -3.071658112                   | -3.188477662 |
|                                    | S490 | 6.171631309  | -0.915646683                   | -0.236979714 |
|                                    | end  |              |                                |              |
| <b>product Fe2-NH-NH-a (S=3/2)</b> |      |              | <b>bm522nnhtrha335te.car_4</b> |              |
| Fe( 139) -2.004                    | C1   | -7.761119156 | -5.375390387                   | 1.312380187  |
| Fe( 140) 0.024                     | C2   | -8.096191682 | -6.534516981                   | 0.367152864  |
| Fe( 141) -2.485                    | C3   | -8.654026757 | -3.479036455                   | 2.592444040  |
| Fe( 142) 2.405                     | C4   | -8.007667077 | -3.740895713                   | 3.950700079  |
| Fe( 143) 2.724                     | C5   | -7.593704421 | -5.337569832                   | 5.758329472  |
| Fe( 144) 2.231                     | C6   | -6.068183519 | -5.458160229                   | 5.692324713  |
| Fe( 145) -0.249                    | C7   | -4.091501848 | -5.789865335                   | 4.300670670  |
|                                    | C8   | -3.518100687 | -4.370549085                   | 4.326551495  |
|                                    | C9   | -3.866748590 | -2.026046583                   | 3.717742478  |
|                                    | C10  | -3.867721999 | -1.433522228                   | 5.134335589  |
|                                    | C11  | -4.939616936 | -1.259408677                   | 7.292733520  |
|                                    | C12  | -3.888173986 | -1.849581333                   | 8.243095214  |
|                                    | C13  | -2.908298380 | -3.896175801                   | 9.171963187  |
|                                    | C14  | -1.432069889 | -4.148499253                   | 8.836146843  |
|                                    | C15  | 0.218165467  | -4.699720127                   | 7.092873532  |
|                                    | C16  | 0.950027846  | -3.569879939                   | 6.368155912  |
|                                    | C17  | 0.694943055  | -1.283742703                   | 5.428585828  |
|                                    | C18  | 0.776024030  | -0.074765478                   | 6.375793018  |
|                                    | C19  | -0.095065503 | -1.031701394                   | 4.120705259  |
|                                    | C20  | 0.318956022  | 0.295083660                    | 3.475060763  |
|                                    | C21  | 0.082851685  | -2.205176345                   | 3.148311822  |
|                                    | C22  | -0.423742893 | 1.631238279                    | 7.666128689  |
|                                    | C23  | -0.072794925 | 1.277772873                    | 9.122931524  |
|                                    | C24  | -1.764324272 | 2.389843219                    | 7.526041301  |
|                                    | C25  | -1.850809068 | 3.551650685                    | 8.521768793  |
|                                    | C26  | -1.942533354 | 2.902713009                    | 6.090447812  |
|                                    | C27  | -0.467907025 | -0.128620735                   | 11.056709682 |
|                                    | C28  | 0.995848003  | -0.407013639                   | 11.334809419 |
|                                    | C29  | 5.874790606  | -11.651048050                  | 3.679263938  |
|                                    | C30  | 6.516874255  | -10.372180489                  | 3.154686327  |
|                                    | C31  | 6.818812242  | -7.962437325                   | 3.687811874  |
|                                    | C32  | 8.042698763  | -7.563197607                   | 4.531690029  |
|                                    | C33  | 5.632556328  | -7.016710250                   | 3.937166335  |
|                                    | C34  | 5.943992056  | -5.570659386                   | 3.562203207  |
|                                    | C35  | 4.679510263  | -4.717543834                   | 3.485432439  |
|                                    | C36  | 4.915876454  | -2.230184222                   | 3.590632147  |
|                                    | C37  | 10.273972654 | -6.545836352                   | 4.463833236  |

|      |               |              |              |
|------|---------------|--------------|--------------|
| C38  | 10.442607539  | -5.043029100 | 4.465273107  |
| C39  | -5.372362327  | -2.675205477 | -1.589584938 |
| C40  | -5.733082244  | -1.239373647 | -1.164319771 |
| C41  | -3.835100888  | -2.815888206 | -1.521712827 |
| C42  | -3.273599987  | -4.247830316 | -1.635427089 |
| C43  | -3.007770787  | -4.742509063 | -3.057582406 |
| C44  | -6.190285750  | 1.000610445  | -2.081523283 |
| C45  | -7.269974295  | 1.475453979  | -1.098893457 |
| C46  | -6.363165323  | 1.604129691  | -3.480898442 |
| C47  | -9.423995527  | 0.985048839  | -0.038923729 |
| C48  | -9.015715152  | 0.978779083  | 1.437470235  |
| C49  | -7.306711407  | 0.404164937  | 3.098193245  |
| C50  | -6.116697991  | 1.339216934  | 3.316879979  |
| C51  | -4.613675080  | 3.047551636  | 2.417645754  |
| C52  | -5.043952311  | 4.362500251  | 3.112595696  |
| C53  | -4.012122643  | 3.472636088  | 1.069072937  |
| C54  | -3.363636193  | 2.412179819  | 0.240173527  |
| C55  | -2.824667409  | 1.176112883  | 0.5038924625 |
| C56  | -2.515274877  | 1.590863301  | -1.658727401 |
| C57  | -6.849569192  | 6.035030592  | 3.278451276  |
| C58  | -6.724702116  | 6.207291711  | 4.791054302  |
| C59  | -8.333662984  | 6.098097517  | 2.844272489  |
| C60  | -8.936610299  | 7.466027633  | 2.710309829  |
| C61  | -8.874443306  | 8.568403676  | 3.540672230  |
| C62  | -10.137212316 | 9.005768919  | 1.773369952  |
| C63  | 9.256550500   | 1.682008450  | 3.340635274  |
| C64  | 10.296990963  | 0.591004946  | 3.164567102  |
| C65  | 7.866193298   | 1.022371939  | 3.177990381  |
| C66  | 6.728290013   | 1.987088110  | 3.412121685  |
| C67  | 6.147418865   | 2.149760848  | 4.682035298  |
| C68  | 6.226799493   | 2.769595171  | 2.356029907  |
| C69  | 5.099329413   | 3.054294196  | 4.893530490  |
| C70  | 5.200983982   | 3.692247671  | 2.555741377  |
| C71  | 4.630367245   | 3.827884249  | 3.823902525  |
| C72  | 5.372739406   | 6.838369090  | -1.431237941 |
| C73  | 4.321163108   | 7.942702318  | -1.635155039 |
| C74  | 4.695586687   | 5.504913794  | -1.115759683 |
| C75  | 3.310468910   | 9.531393633  | -3.233765582 |
| C76  | 1.833012747   | 9.160291214  | -3.388753644 |
| C77  | 0.208099284   | 7.265169122  | -3.331459700 |
| C78  | -0.242463884  | 6.921151565  | -1.887419570 |
| C79  | 0.232061186   | 6.019335960  | -4.246806356 |
| C80  | -1.022639641  | 5.143555536  | -4.353479683 |
| C81  | -2.165648177  | 5.685350597  | -5.228822710 |
| C82  | -3.700271382  | 7.592499965  | -4.753406214 |
| C83  | 0.309101804   | 5.969306188  | 0.303075026  |
| C84  | 0.131639317   | 7.179012502  | 1.231860472  |
| C85  | 1.334766692   | 5.018972881  | 0.958362760  |
| C86  | 1.187112040   | 9.250268780  | 1.995576396  |
| C87  | 0.547804108   | 10.595989335 | 1.687747838  |
| C88  | -0.844385993  | 11.869569903 | 0.144889400  |
| C89  | -2.123731622  | 12.425892675 | 0.814248001  |
| C90  | -0.981875883  | 11.877292697 | -1.379805395 |
| C91  | -2.139169972  | 11.038906906 | -1.908834003 |
| C92  | -4.070944610  | 11.951494819 | 2.222785102  |
| C93  | -3.986874981  | 13.059456991 | 3.264584723  |
| C94  | -4.733111956  | 10.688925141 | 2.840081679  |
| C95  | -4.972796555  | 9.613537040  | 1.805566135  |
| C96  | -6.143011726  | 9.622295766  | 1.031837327  |
| C97  | -4.015199359  | 8.619997496  | 1.546589801  |
| C98  | -6.343932977  | 8.685930862  | 0.016572315  |
| C99  | -4.187982107  | 7.688536079  | 0.518057692  |
| C100 | -5.352848804  | 7.738758791  | -0.241746023 |
| C101 | 4.065862528   | -4.007416824 | -8.999505843 |
| C102 | 2.637248700   | -3.740471749 | -8.558777027 |
| C103 | 1.182861885   | -2.185440720 | -7.279785736 |
| C104 | 0.688173341   | -0.832490631 | -7.802016875 |
| C105 | 1.096746274   | 1.592799776  | -7.749043650 |
| C106 | 2.285336000   | 2.532030693  | -7.936698683 |
| C107 | 4.576842807   | 3.156457613  | -7.433251753 |
| C108 | 5.076366977   | 3.411828033  | -8.841834177 |
| C109 | -2.762484390  | -3.493260475 | -9.196733084 |
| C110 | -3.787359814  | -2.396274062 | -8.881314821 |
| C111 | -2.279351574  | -4.157218528 | -7.887192052 |
| C112 | -1.556936543  | -5.487149399 | -8.170745531 |
| C113 | -0.897668717  | -6.013807607 | -6.915569197 |
| C114 | -4.183715192  | -0.074836968 | -8.219467324 |
| C115 | -3.702476671  | 1.205481840  | -8.872288551 |
| C116 | -4.546435625  | 0.057142342  | -6.719751715 |
| C117 | -3.316305930  | 0.045274713  | -5.854688836 |

|       |              |               |              |
|-------|--------------|---------------|--------------|
| C118  | -2.563435052 | 1.215128475   | -5.650153319 |
| C119  | -2.825543852 | -1.172830767  | -5.355009055 |
| C120  | -1.311756440 | 1.147252194   | -5.028072627 |
| C121  | -1.579532892 | -1.237375413  | -4.725662008 |
| C122  | -0.805099386 | -0.080058804  | -4.591396403 |
| C123  | 7.950639498  | -6.292106524  | -4.801186884 |
| C124  | 9.118076088  | -6.338634719  | -3.803467739 |
| C125  | 6.630590686  | -6.594010865  | -4.074924274 |
| C126  | 5.378858951  | -6.416398361  | -4.870539557 |
| C127  | 5.038186754  | -7.045749057  | -6.050258018 |
| C128  | 3.288491733  | -5.923365553  | -5.288442614 |
| C129  | 10.319346599 | -7.520184179  | -2.067265460 |
| C130  | 11.680722549 | -7.304157177  | -2.691867717 |
| C131  | 0.613738505  | -6.892613839  | -0.244330220 |
| C132  | 2.102697611  | -6.915095381  | 0.086293495  |
| C133  | 3.031110200  | -7.065384978  | -1.156757143 |
| C134  | 2.973838070  | -8.524350145  | -1.682826315 |
| C135  | 4.017691921  | -8.877178948  | -2.745123799 |
| C136  | 4.043588116  | -10.369552103 | -3.142849239 |
| C137  | 4.477116173  | -6.757494944  | -0.734562533 |
| C138  | 3.551702419  | -0.713544974  | -2.236544384 |
| Fe139 | 3.805359960  | -2.000666640  | -3.750946794 |
| Fe140 | 2.096583163  | 0.546854160   | -1.235619189 |
| Fe141 | 4.947159520  | 0.468508847   | -1.472386985 |
| Fe142 | 3.784783197  | 0.491366207   | -3.771750617 |
| Fe143 | 3.889544163  | 2.710153125   | -2.334712431 |
| Fe144 | 4.727272268  | -2.075411002  | -1.412100333 |
| Fe145 | 2.050354808  | -2.294668018  | -1.864974079 |
| H146  | -6.293865535 | -7.491664621  | 0.407136312  |
| H147  | -6.478417217 | -6.508826396  | -0.882605704 |
| H148  | -9.752130799 | -4.851321605  | 1.376839197  |
| H149  | -8.811132445 | -6.178682508  | -0.392239008 |
| H150  | -8.640160678 | -7.283688205  | 0.968244798  |
| H151  | -8.021236219 | -2.737820054  | 2.082638746  |
| H152  | -8.786854139 | -5.635457716  | 3.993362949  |
| H153  | -9.639540497 | -3.023282464  | 2.759848006  |
| H154  | -8.011018457 | -6.300934587  | 6.079309948  |
| H155  | -6.133249190 | -5.853348403  | 3.670382782  |
| H156  | -7.816106019 | -4.594298864  | 6.534952091  |
| H157  | -2.856627496 | -1.885137821  | 3.313086555  |
| H158  | -5.087741510 | -3.701942190  | 3.171024219  |
| H159  | -3.859198014 | -6.260699038  | 3.335880075  |
| H160  | -4.776641177 | -0.173658318  | 7.272108743  |
| H161  | -5.681586938 | -2.322066824  | 5.566905780  |
| H162  | -3.591075110 | -6.359472105  | 5.092591628  |
| H163  | -4.570615229 | -1.465607823  | 3.087318019  |
| H164  | -4.300982031 | -3.750334988  | 7.553493308  |
| H165  | -5.937113688 | -1.457169682  | 7.709645713  |
| H166  | -0.230712339 | -3.157944205  | 3.598588809  |
| H167  | -0.537787583 | -2.053187369  | 2.250221918  |
| H168  | 1.131206585  | -2.298802903  | 2.823429841  |
| H169  | -1.158241945 | -0.959189705  | 4.393076107  |
| H170  | -3.373631063 | -4.874943435  | 9.361325890  |
| H171  | -1.944317768 | 2.087117718   | 5.354678399  |
| H172  | -1.490740333 | -0.250683139  | 9.191030760  |
| H173  | -1.814346829 | 3.213005116   | 9.566958448  |
| H174  | 1.383702490  | 0.290739378   | 3.199289134  |
| H175  | 0.136350042  | 1.155744669   | 4.134399725  |
| H176  | 9.337713610  | 2.045376868   | 4.383092313  |
| H177  | -2.897632487 | 3.438114115   | 5.990639210  |
| H178  | -2.795165320 | 4.095674554   | 8.373733492  |
| H179  | -1.131839895 | 3.603658991   | 5.831518971  |
| H180  | -1.021644101 | 4.260243583   | 8.366115253  |
| H181  | -2.580809776 | 1.679061742   | 7.749407102  |
| H182  | 0.394146817  | 2.292597683   | 7.342495706  |
| H183  | -1.289706532 | 0.091310515   | 6.434174799  |
| H184  | -0.269211631 | 0.462545027   | 2.558433703  |
| H185  | 1.654959743  | 4.274849622   | 0.213255622  |
| H186  | 0.815908802  | 4.493721631   | 1.773037768  |
| H187  | 2.706239735  | 5.362194095   | 2.333421530  |
| H188  | 3.236703912  | 4.690145012   | 4.865414292  |
| H189  | 4.817756965  | 4.284621389   | 1.724401540  |
| H190  | 6.630702001  | 2.637436290   | 1.349709529  |
| H191  | 6.509763778  | 1.553655215   | 5.524803235  |
| H192  | -0.764907983 | -2.493013858  | 6.415539844  |
| H193  | 0.206022253  | -5.567235452  | 6.416682104  |
| H194  | 0.814552467  | -4.968257900  | 7.974803811  |
| H195  | -1.873777348 | -4.427039339  | 6.817773409  |
| H196  | -2.915916028 | -3.323054213  | 10.107124801 |
| H197  | 4.646670825  | 3.153355657   | 5.884135473  |

|      |               |              |               |
|------|---------------|--------------|---------------|
| H198 | 1.737800881   | -1.492378149 | 5.163784096   |
| H199 | -0.815459288  | 0.651475461  | 11.753356145  |
| H200 | -1.022685241  | -1.053434352 | 11.279384681  |
| H201 | 1.592199881   | -0.742689605 | 10.454461858  |
| H202 | 11.157675504  | -7.010471555 | 3.999328279   |
| H203 | -1.765021344  | -5.957539721 | -4.137450124  |
| H204 | 1.268549282   | -6.076101880 | -1.870294003  |
| H205 | -2.292685897  | -6.232573536 | -8.506270927  |
| H206 | -0.811930830  | -5.352865023 | -8.967845144  |
| H207 | -3.134086196  | -4.350148145 | -7.220507595  |
| H208 | -3.140181775  | 1.048197114  | -9.823026534  |
| H209 | -3.351793164  | -4.242633763 | -9.747337660  |
| H210 | -3.389366162  | -2.181018648 | -2.305348314  |
| H211 | -3.967266629  | -4.968206623 | -1.168145865  |
| H212 | -2.276724354  | -1.025388413 | -8.487098057  |
| H213 | -5.127101537  | -0.307462785 | -8.755802124  |
| H214 | -1.041597496  | -2.409803780 | -9.623626369  |
| H215 | -1.314360767  | -5.802335753 | -2.443243677  |
| H216 | -1.618700616  | -3.455820776 | -7.354044475  |
| H217 | -1.204148022  | -3.795038415 | -10.498431028 |
| H218 | -6.782614934  | -3.454822014 | -2.882160825  |
| H219 | -3.515210280  | -2.405906049 | -0.552498228  |
| H220 | 0.805729676   | -5.308667941 | -7.584549300  |
| H221 | -2.342648082  | -4.311363082 | -1.053804184  |
| H222 | -3.850692005  | 2.597413086  | 3.068032151   |
| H223 | -2.772575440  | 0.605969527  | 1.423007300   |
| H224 | -8.108449055  | 0.746290306  | 3.767234420   |
| H225 | -7.266323938  | -0.065938497 | 1.018061793   |
| H226 | -6.957086666  | 4.066728749  | 2.435076251   |
| H227 | -8.355362733  | 8.750479113  | 4.474543929   |
| H228 | -6.869074945  | 5.257756446  | 5.363008859   |
| H229 | -8.933293329  | 5.467267960  | 3.524204674   |
| H230 | -6.269990794  | 6.829996618  | 2.783570593   |
| H231 | -10.780334943 | 9.565277209  | 1.099736864   |
| H232 | -3.266168441  | 4.254477913  | 1.285627224   |
| H233 | -4.802081789  | 3.947536633  | 0.465643255   |
| H234 | -9.802365841  | 10.476906313 | 3.276728025   |
| H235 | -8.404222083  | 5.633142217  | 1.848187349   |
| H236 | -6.197917758  | 2.046135371  | 1.357744916   |
| H237 | -7.015814588  | -0.599790682 | 3.440904433   |
| H238 | -9.846473376  | 1.980598974  | -0.234827195  |
| H239 | -2.197178320  | 1.483958196  | -2.693647080  |
| H240 | -10.227005323 | 0.249409304  | -0.178213915  |
| H241 | 10.297591998  | 3.270635321  | 2.576366291   |
| H242 | 8.686957837   | 3.365027684  | 2.326076331   |
| H243 | 1.567128466   | 5.981775040  | -1.447638481  |
| H244 | -0.664538867  | 5.458774392  | 0.277902160   |
| H245 | 1.740235258   | 8.073167221  | 0.327545181   |
| H246 | -3.507600509  | 3.480728727  | -1.632194281  |
| H247 | -5.144231386  | 4.165513806  | -2.810162631  |
| H248 | -6.705182601  | 3.384252875  | -4.230223942  |
| H249 | -4.816644746  | 5.395909048  | -1.850444589  |
| H250 | -5.533374482  | 1.248286212  | -4.113741080  |
| H251 | -7.315302223  | 1.268077417  | -3.919638680  |
| H252 | -0.027491281  | 11.584007383 | -1.839328701  |
| H253 | -1.184198246  | 12.918058020 | -1.678051885  |
| H254 | -0.906360847  | 10.221698882 | -3.362055567  |
| H255 | -2.595607516  | 9.717039292  | -3.364448232  |
| H256 | -3.789048399  | 9.145567663  | -6.085848178  |
| H257 | -2.659848342  | 4.856438327  | -5.758136203  |
| H258 | -7.265465661  | 8.698036061  | -0.571225582  |
| H259 | -3.110009285  | 8.550402275  | 2.155239519   |
| H260 | -4.667749214  | 7.796095722  | -2.946532105  |
| H261 | 1.052866092   | 5.373390124  | -3.895632137  |
| H262 | 2.338100034   | 7.194129530  | -3.259749767  |
| H263 | -1.408592083  | 4.879241700  | -3.356640925  |
| H264 | -8.386214762  | -0.183844319 | -1.511874024  |
| H265 | 3.642217682   | 9.992940810  | -4.173365249  |
| H266 | -6.115176616  | -0.956808711 | -3.100748750  |
| H267 | 0.522261578   | 6.358756250  | -5.254609339  |
| H268 | -3.403539750  | 6.964159857  | 0.295616571   |
| H269 | 3.350740942   | 10.299374615 | -2.447797039  |
| H270 | -3.087911762  | 7.697825828  | -6.715153695  |
| H271 | -5.129239915  | 8.936315666  | -4.168739722  |
| H272 | -5.213172676  | -3.535598734 | -3.453106059  |
| H273 | -5.807224028  | -3.332301691 | -0.813332131  |
| H274 | -6.916143398  | 10.369987428 | 1.224010744   |
| H275 | -5.254211502  | 1.380010795  | -1.647541046  |
| H276 | -0.497565610  | 8.019173156  | -3.694273487  |
| H277 | -1.749532180  | 6.353648468  | -5.993388195  |

|      |              |               |               |
|------|--------------|---------------|---------------|
| H278 | -0.693639208 | 4.200459228   | -4.812373509  |
| H279 | -3.606645690 | 5.872413769   | -3.668718349  |
| H280 | 0.783076796  | 8.904330986   | 2.958818558   |
| H281 | -0.455021462 | 9.751603109   | 0.118655506   |
| H282 | -0.077417837 | 12.615556443  | 0.404638497   |
| H283 | 2.263336781  | 9.429538235   | 2.120460330   |
| H284 | -2.442603701 | 10.649290545  | 1.739741516   |
| H285 | 4.589580447  | -3.055213784  | -9.168625676  |
| H286 | 4.555554000  | -4.491445672  | -8.127698880  |
| H287 | 7.930026609  | -5.256125492  | -5.170351001  |
| H288 | 5.033635649  | -5.160683422  | -10.372651500 |
| H289 | 3.489724422  | -5.627806715  | -10.089061451 |
| H290 | 5.484246563  | 4.756514104   | -0.969514653  |
| H291 | 5.738599531  | 7.416102679   | 0.492912333   |
| H292 | 4.822437647  | 8.075368889   | -3.627469060  |
| H293 | 4.107428585  | 5.596568152   | -0.191579839  |
| H294 | 6.830082278  | 8.004243248   | -0.575242768  |
| H295 | 5.414662051  | 2.737952669   | -6.853851841  |
| H296 | 5.968526129  | 6.724799522   | -2.349806792  |
| H297 | 5.330366004  | -7.089221821  | 4.995147140   |
| H298 | 7.079675612  | -7.937676416  | 2.621961361   |
| H299 | 3.617290619  | 1.337111864   | -6.856170660  |
| H300 | 5.217248142  | -0.229392823  | 3.376483140   |
| H301 | 0.549339890  | 1.556793399   | -8.698843800  |
| H302 | -1.201882115 | -2.189899560  | -4.347517055  |
| H303 | 0.432676928  | 2.079813952   | -7.014404025  |
| H304 | 4.218628875  | -4.608915270  | 4.474338495   |
| H305 | 2.065467287  | 0.045381297   | -6.586754315  |
| H306 | 3.933106296  | -5.191182020  | 2.829026710   |
| H307 | 4.794214699  | -7.385366780  | 3.324488847   |
| H308 | 6.435537439  | -5.544298926  | 2.578678158   |
| H309 | 6.639000097  | -5.116263335  | 4.286077841   |
| H310 | -5.208728430 | -0.782443116  | -6.462729512  |
| H311 | 5.953201968  | -9.537576630  | 4.882420673   |
| H312 | 4.974271494  | -11.809690516 | 3.067196624   |
| H313 | 0.176054753  | -0.129861532  | -4.119462283  |
| H314 | 6.254281539  | -11.918686228 | 5.686403158   |
| H315 | 4.690042665  | -12.180057332 | 5.277552949   |
| H316 | 5.501880323  | -3.405366937  | 2.051077870   |
| H317 | -0.711717502 | 2.048262741   | -4.884225261  |
| H318 | -3.416071020 | -2.084855901  | -5.467477731  |
| H319 | 7.680520893  | -9.921797067  | -1.674137978  |
| H320 | 6.652392472  | -7.639969280  | -3.723241708  |
| H321 | 6.638739822  | -8.162157344  | -0.120119443  |
| H322 | 6.825557274  | -10.530236627 | -2.819894260  |
| H323 | 4.871907958  | 2.587609849   | -9.566591833  |
| H324 | 6.322609227  | -5.011971593  | -0.193235043  |
| H325 | 2.299571283  | -7.707528667  | 0.818100328   |
| H326 | 3.258451066  | -2.009903026  | -7.666155724  |
| H327 | 3.113748112  | -9.182088963  | -0.810860850  |
| H328 | 3.150384152  | -7.066760388  | -7.058361278  |
| H329 | 2.272216257  | -5.558327433  | -5.220115816  |
| H330 | 6.567548051  | -12.476102979 | 3.440163232   |
| H331 | 5.885514621  | -1.183234075  | 2.111106381   |
| H332 | 8.329097872  | -5.802259863  | 0.819896895   |
| H333 | 7.218120328  | -3.754292144  | -0.062646296  |
| H334 | 8.966165292  | -6.865960139  | 2.793872755   |
| H335 | 3.590788877  | -2.798246652  | 5.115542054   |
| H336 | 3.816609348  | -8.298242595  | -3.659452899  |
| H337 | 5.023503054  | -8.596864087  | -2.403835877  |
| H338 | 1.962777153  | -8.717018389  | -2.073071689  |
| H339 | 1.313500903  | -2.150775799  | -6.186375165  |
| H340 | -2.946206226 | 2.169535860   | -6.019451504  |
| H341 | -5.115252911 | 0.992505347   | -6.606105711  |
| H342 | 2.314309673  | -5.946727313  | 0.570444565   |
| H343 | 8.500656607  | -7.331884660  | 0.585179509   |
| H344 | 7.397168700  | -9.259733787  | 0.662167519   |
| H345 | 4.263205784  | -1.206293977  | 5.225178839   |
| H346 | 5.610135257  | -7.701085281  | -6.694649778  |
| H347 | 6.570046715  | -5.973030298  | -3.172820161  |
| H348 | 0.435635169  | -2.941151902  | -7.528866492  |
| H349 | 4.293339212  | 4.114432442   | -6.970668006  |
| H350 | 7.807412641  | 0.186550902   | 3.889830850   |
| H351 | 7.798518960  | 0.602981769   | 2.161284479   |
| H352 | 9.035531502  | -6.919250298  | -6.425071844  |
| H353 | 8.268430070  | -8.143929728  | -5.657028318  |
| H354 | 10.317212749 | -8.529130552  | -1.626201571  |
| H355 | 8.609705046  | -8.257219734  | -3.107485863  |
| H356 | 11.736701456 | -7.550143955  | -3.780174695  |
| H357 | 10.168590056 | -6.802837951  | -1.245108424  |

|       |              |               |               |
|-------|--------------|---------------|---------------|
| H358  | 10.559926648 | 0.372550024   | 2.101047955   |
| H359  | -2.977495295 | 13.215034640  | 3.712856664   |
| H360  | 10.240406847 | -6.867162159  | 5.519834024   |
| H361  | 9.492537238  | -4.459234659  | 4.398234224   |
| H362  | -4.705897474 | 12.320388898  | 1.399961728   |
| H363  | -4.096310454 | 10.310234124  | 3.654973099   |
| H364  | -5.684276252 | 11.008492991  | 3.289708966   |
| H365  | 1.000604696  | -3.288256992  | -1.471853074  |
| H366  | 3.888843307  | -0.418079684  | 0.942660687   |
| H367  | -6.440497103 | 6.820859136   | -1.570293084  |
| H368  | 1.143132529  | -0.633962437  | 0.799391044   |
| H369  | -1.715643915 | -0.143361120  | -0.818071854  |
| M0370 | 3.805661387  | -4.383969839  | -2.488505993  |
| N371  | -6.973946056 | -7.179105782  | -0.290051605  |
| N372  | -8.832654881 | -4.666248183  | 1.770555392   |
| N373  | -8.217488303 | -4.961523086  | 4.499790590   |
| N374  | -5.534787113 | -5.814774756  | 4.497455023   |
| N375  | -4.243338653 | -3.429469624  | 3.670163155   |
| N376  | -4.886559928 | -1.801211925  | 5.945332064   |
| N377  | -3.710170371 | -3.195086923  | 8.178885029   |
| N378  | -1.133783282 | -4.387992908  | 7.525720173   |
| N379  | 0.214643355  | -2.459754493  | 6.138843699   |
| N380  | -0.404971407 | 0.448825391   | 6.803764318   |
| N381  | -0.715678436 | 0.214210805   | 9.669451277   |
| N382  | 5.493046500  | -11.576466797 | 5.095914851   |
| N383  | 6.421593633  | -9.324396771  | 3.995398827   |
| N384  | 4.994888126  | -3.394767561  | 2.941108148   |
| N385  | 4.271762171  | -2.112306745  | 4.766165784   |
| N386  | 5.541616239  | -1.146971905  | 3.080809817   |
| N387  | 9.048983557  | -6.985476007  | 3.827937330   |
| N388  | -5.894619045 | -2.951467018  | -2.933409162  |
| N389  | -1.957387748 | -5.569505234  | -3.207555034  |
| N390  | -6.109054996 | -0.445014730  | -2.202110309  |
| N391  | -8.363283428 | 0.687397251   | -0.986197209  |
| N392  | -7.846137972 | 0.355389153   | 1.752552389   |
| N393  | -5.705225444 | 2.097304459   | 2.254180398   |
| N394  | -3.156772606 | 2.635254525   | -1.115216099  |
| N395  | -2.320034739 | 0.690498323   | -0.688312075  |
| N396  | -6.334815964 | 4.723580561   | 2.899901552   |
| N397  | -9.728669801 | 7.752873354   | 1.609273484   |
| N398  | -9.640513591 | 9.536139861   | 2.926876458   |
| N399  | 9.476975350  | 2.714065407   | 2.324421141   |
| N400  | 6.293394912  | 7.166983870   | -0.332411803  |
| N401  | 4.210965204  | 8.441175489   | -2.902264636  |
| N402  | 1.549355009  | 7.841343923   | -3.359339778  |
| N403  | -3.184892947 | 6.400934939   | -4.454159421  |
| N404  | -3.403029834 | 8.223586658   | -5.906695752  |
| N405  | -4.463387742 | 8.240048109   | -3.845117172  |
| N406  | 0.678190289  | 6.338469630   | -1.065929813  |
| N407  | 0.977344135  | 8.221576066   | 0.994169362   |
| N408  | -0.366886708 | 10.603957540  | 0.671275958   |
| N409  | -1.879510239 | 10.378272350  | -3.070887039  |
| N410  | -2.749299003 | 11.618394103  | 1.707171306   |
| N411  | 4.085723253  | -4.806429498  | -10.226031942 |
| N412  | 2.440604157  | -2.576052973  | -7.904855416  |
| N413  | 1.387735303  | 0.229577961   | -7.343589061  |
| N414  | 3.482557602  | 2.198969692   | -7.392271282  |
| N415  | -1.722700543 | -3.004124283  | -10.110944100 |
| N416  | -3.289236908 | -1.171611159  | -8.543565752  |
| N417  | 8.156281433  | -7.173052724  | -5.965357657  |
| N418  | 4.270992982  | -5.703973736  | -4.412733023  |
| N419  | 3.722599351  | -6.719780223  | -6.292968335  |
| N420  | 9.256710914  | -7.464876442  | -3.053687781  |
| N421  | 0.049990436  | 2.503559965   | -0.387660221  |
| N422  | 2.089024023  | -0.340030037  | 0.493958923   |
| N423  | 0.836332229  | 1.749965916   | -0.676268105  |
| N424  | 2.953424871  | -0.675781800  | 1.336034909   |
| O425  | -6.603533178 | -5.117185678  | 1.689272239   |
| O426  | -7.328889744 | -2.860249991  | 4.507569773   |
| O427  | -5.379329912 | -5.252045039  | 6.705491851   |
| O428  | -2.463984125 | -4.094982029  | 4.920620297   |
| O429  | -2.972405390 | -0.658992438  | 5.507876039   |
| O430  | -3.283136083 | -1.122479561  | 9.050562883   |
| O431  | -0.590260290 | -4.168380024  | 9.743197972   |
| O432  | 2.139059585  | -3.721926272  | 6.025228741   |
| O433  | 1.878049215  | 0.378253455   | 6.720464433   |
| O434  | 0.762962741  | 1.935370560   | 9.764623921   |
| O435  | 1.490023821  | -0.331163212  | 12.449466014  |
| O436  | 7.047586281  | -10.360234213 | 2.025162177   |
| O437  | 8.066603229  | -7.754757496  | 5.760214458   |

|      |              |               |              |
|------|--------------|---------------|--------------|
| O438 | 11.525727669 | -4.486804535  | 4.554593434  |
| O439 | -5.664509851 | -0.837257117  | 0.013472757  |
| O440 | -3.743499896 | -4.419785771  | -4.019292092 |
| O441 | -7.113396663 | 2.518933822   | -0.439667667 |
| O442 | -6.350482986 | 3.042541469   | -3.390133711 |
| O443 | -9.754778708 | 1.520847745   | 2.270450716  |
| O444 | -5.575507710 | 1.392607205   | 4.426042499  |
| O445 | -4.231630632 | 5.064296609   | 3.723099417  |
| O446 | -6.536232066 | 7.271579997   | 5.353532550  |
| O447 | 10.809658675 | -0.023753804  | 4.088469954  |
| O448 | 3.591310039  | 4.729491423   | 3.958131819  |
| O449 | 3.616394984  | 8.366561497   | -0.702847473 |
| O450 | 0.992603214  | 10.067684014  | -3.538244019 |
| O451 | -1.399925469 | 7.175121812   | -1.520997664 |
| O452 | -0.685044939 | 7.152260362   | 2.161706565  |
| O453 | 2.471425045  | 5.728947845   | 1.456547196  |
| O454 | 0.843878540  | 11.604621802  | 2.339455013  |
| O455 | -2.501145892 | 13.581567762  | 0.574308324  |
| O456 | -3.247570465 | 11.018246480  | -1.354867183 |
| O457 | -4.954300428 | 13.714722907  | 3.616250705  |
| O458 | -5.497057372 | 6.838965079   | -1.317501521 |
| O459 | 1.731484084  | -4.583703737  | -8.765665626 |
| O460 | -0.269000231 | -0.738218750  | -8.597677118 |
| O461 | 2.114921823  | 3.605786108   | -8.538115323 |
| O462 | 5.690976824  | 4.414726321   | -9.165609361 |
| O463 | -5.008065702 | -2.623009591  | -8.912662597 |
| O464 | -1.515373707 | -6.583755005  | -6.022730690 |
| O465 | 0.424655394  | -5.785500844  | -6.784576105 |
| O466 | -3.934594897 | 2.331007115   | -8.453340726 |
| O467 | 9.929597086  | -5.398324622  | -3.697357146 |
| O468 | 12.670178372 | -6.954653951  | -2.065263077 |
| O469 | 0.306003130  | -6.284581498  | -1.395492068 |
| O470 | -0.247426159 | -7.343825820  | 0.509699842  |
| O471 | 5.195854547  | -10.902692826 | -3.325025057 |
| O472 | 2.935438519  | -10.956072153 | -3.295449309 |
| O473 | 5.060828609  | -5.755000765  | -1.337504361 |
| O474 | 5.044324875  | -7.454033194  | 0.128962976  |
| O475 | 2.610015637  | -6.122835612  | -2.146907677 |
| O476 | 8.931181366  | -6.554727989  | 1.039106295  |
| O477 | 6.938399590  | -4.547877555  | 0.431990239  |
| O478 | -4.407300985 | 4.738470528   | -2.465218312 |
| O479 | 7.777358436  | -10.408816600 | -2.522796356 |
| O480 | 7.512812844  | -8.633580727  | -0.097680685 |
| S481 | 3.576958609  | 4.945226820   | -2.483833449 |
| S482 | 2.045699929  | 1.819800263   | -3.319483744 |
| S483 | 2.046284123  | -3.379280858  | -3.747525083 |
| S484 | 3.796353369  | 1.935752083   | -0.273758951 |
| S485 | 0.396076118  | -0.965235099  | -1.643429704 |
| S486 | 4.023022627  | -0.755126889  | -5.566968114 |
| S487 | 3.249375140  | -3.418558934  | -0.377696468 |
| S488 | 5.628241483  | 1.640855916   | -3.297343848 |
| S489 | 5.663594274  | -3.080122304  | -3.151761572 |
| S490 | 6.193978708  | -0.894810260  | -0.259493172 |
| end  |              |               |              |

## N2-ready-b to Fe2-N-N

Figure 8, scheme F

| reactant <b>N2-ready-b</b> (S=3/2) | <b>bm526hx7hnexp2n2ndtb.car_2</b> |              |             |
|------------------------------------|-----------------------------------|--------------|-------------|
| C1                                 | -7.759126357                      | -5.375903109 | 1.294259097 |
| C2                                 | -8.119554229                      | -6.528317982 | 0.348858971 |
| C3                                 | -8.615376949                      | -3.464925813 | 2.579009556 |
| C4                                 | -7.972609856                      | -3.726120376 | 3.938510057 |
| C5                                 | -7.543135467                      | -5.321872155 | 5.742825846 |
| C6                                 | -6.017490802                      | -5.435283060 | 5.674291100 |
| C7                                 | -4.042117962                      | -5.752638687 | 4.277957841 |
| C8                                 | -3.495931550                      | -4.322736160 | 4.307342631 |
| C9                                 | -3.898270665                      | -1.988470476 | 3.663919334 |
| C10                                | -3.906362024                      | -1.375939804 | 5.072871304 |
| C11                                | -4.941777367                      | -1.215388627 | 7.245401448 |
| C12                                | -3.870477550                      | -1.779922850 | 8.190460367 |
| C13                                | -2.870353597                      | -3.806208852 | 9.144325863 |
| C14                                | -1.398383414                      | -4.094964482 | 8.817741039 |
| C15                                | 0.253828601                       | -4.753538432 | 7.112188776 |
| C16                                | 1.002181921                       | -3.625020387 | 6.395868426 |
| C17                                | 0.699657462                       | -1.349280285 | 5.426546540 |
| C18                                | 0.805542169                       | -0.136072864 | 6.365958044 |

|     |               |               |              |
|-----|---------------|---------------|--------------|
| C19 | -0.209971226  | -1.131537503  | 4.189379112  |
| C20 | -0.021673815  | 0.244738568   | 3.548005816  |
| C21 | -0.040813298  | -2.283110459  | 3.189630265  |
| C22 | -0.374327127  | 1.591294774   | 7.652950583  |
| C23 | -0.021110621  | 1.254651762   | 9.111931972  |
| C24 | -1.712385684  | 2.354165093   | 7.508794801  |
| C25 | -1.793504727  | 3.520533849   | 8.498975171  |
| C26 | -1.892793340  | 2.862228340   | 6.071959281  |
| C27 | -0.430204966  | -0.108229386  | 11.069283175 |
| C28 | 1.032832409   | -0.386501167  | 11.352398015 |
| C29 | 5.892594196   | -11.624730161 | 3.726692415  |
| C30 | 6.515932814   | -10.344927121 | 3.182879646  |
| C31 | 6.796040303   | -7.924801906  | 3.689969653  |
| C32 | 8.021135866   | -7.528605914  | 4.534630193  |
| C33 | 5.612489998   | -6.975258843  | 3.938811801  |
| C34 | 5.930042260   | -5.531062927  | 3.561176003  |
| C35 | 4.673869751   | -4.664795502  | 3.497794519  |
| C36 | 4.919290386   | -2.168681372  | 3.525676243  |
| C37 | 10.271452958  | -6.556724049  | 4.469047061  |
| C38 | 10.469485943  | -5.057983384  | 4.465891020  |
| C39 | -5.361264169  | -2.683909285  | -1.578223600 |
| C40 | -5.720400351  | -1.248146394  | -1.148383351 |
| C41 | -3.823352000  | -2.824073100  | -1.511407511 |
| C42 | -3.259735629  | -4.255131464  | -1.628738287 |
| C43 | -2.992152173  | -4.744722581  | -3.052773309 |
| C44 | -6.184458216  | 0.993798375   | -2.058964285 |
| C45 | -7.269088620  | 1.460770732   | -1.077335429 |
| C46 | -6.357537234  | 1.602104687   | -3.456453893 |
| C47 | -9.424742523  | 0.957114153   | -0.025409623 |
| C48 | -9.023828743  | 0.966803533   | 1.452861561  |
| C49 | -7.320461382  | 0.426265512   | 3.129152692  |
| C50 | -6.140574880  | 1.375387224   | 3.343537551  |
| C51 | -4.616315032  | 3.053153921   | 2.425693082  |
| C52 | -5.051492432  | 4.362976042   | 3.124924027  |
| C53 | -4.029397184  | 3.488922288   | 1.075162499  |
| C54 | -3.405769355  | 2.430473328   | 0.228945303  |
| C55 | -2.954760662  | 1.156488062   | 0.464632253  |
| C56 | -2.526665010  | 1.639050465   | -1.668390784 |
| C57 | -6.853557252  | 6.039125990   | 3.255824390  |
| C58 | -6.748364546  | 6.203242665   | 4.770921703  |
| C59 | -8.332122177  | 6.098629926   | 2.803975733  |
| C60 | -8.945736151  | 7.462499781   | 2.678563127  |
| C61 | -8.879311443  | 8.565976116   | 3.506896568  |
| C62 | -10.177679381 | 8.988983127   | 1.761952521  |
| C63 | 9.238260047   | 1.646878488   | 3.387824104  |
| C64 | 10.280745104  | 0.556338929   | 3.220085081  |
| C65 | 7.849989779   | 0.988916389   | 3.212042175  |
| C66 | 6.711575851   | 1.956519736   | 3.434163781  |
| C67 | 6.130164770   | 2.134634581   | 4.702107976  |
| C68 | 6.213535379   | 2.728124020   | 2.368107068  |
| C69 | 5.085750313   | 3.045933056   | 4.902423103  |
| C70 | 5.189792435   | 3.655349124   | 2.556276630  |
| C71 | 4.619484894   | 3.807173730   | 3.822766185  |
| C72 | 5.364481075   | 6.843031111   | -1.422733673 |
| C73 | 4.311992357   | 7.947175906   | -1.631012935 |
| C74 | 4.697342168   | 5.506561442   | -1.126323325 |
| C75 | 3.307821419   | 9.539511666   | -3.227573214 |
| C76 | 1.832207332   | 9.162990238   | -3.389363363 |
| C77 | 0.216633642   | 7.263512415   | -3.346731079 |
| C78 | -0.237586866  | 6.922355463   | -1.903482886 |
| C79 | 0.242206179   | 6.018927764   | -4.261973810 |
| C80 | -1.012872303  | 5.144145395   | -4.363176752 |
| C81 | -2.158813879  | 5.683178368   | -5.236038003 |
| C82 | -3.681632342  | 7.600418251   | -4.755470894 |
| C83 | 0.304067379   | 5.970708973   | 0.285315314  |
| C84 | 0.131750130   | 7.183296465   | 1.210617469  |
| C85 | 1.323553080   | 5.017713965   | 0.944157446  |
| C86 | 1.193470580   | 9.250897870   | 1.970643797  |
| C87 | 0.549210708   | 10.594823442  | 1.666950267  |
| C88 | -0.851712676  | 11.868041339  | 0.133991264  |
| C89 | -2.126864536  | 12.424448001  | 0.810692654  |
| C90 | -1.000391481  | 11.879417126  | -1.389521332 |
| C91 | -2.153705185  | 11.029648849  | -1.907605392 |
| C92 | -4.071794615  | 11.948983840  | 2.221653198  |
| C93 | -3.989662567  | 13.055259666  | 3.265096606  |
| C94 | -4.734016674  | 10.685397363  | 2.836819827  |
| C95 | -4.974254420  | 9.611769927   | 1.800845246  |
| C96 | -6.148464702  | 9.617620192   | 1.033053850  |
| C97 | -4.013678223  | 8.623055117   | 1.534549058  |
| C98 | -6.350742911  | 8.682614669   | 0.016916047  |



|       |               |               |              |
|-------|---------------|---------------|--------------|
| C99   | -4.187037356  | 7.693825882   | 0.504023413  |
| C100  | -5.356366428  | 7.741060982   | -0.249055138 |
| C101  | 4.081900581   | -3.992749212  | -9.000904805 |
| C102  | 2.654017405   | -3.730736775  | -8.552910375 |
| C103  | 1.196591216   | -2.183199834  | -7.269724592 |
| C104  | 0.695016448   | -0.831504002  | -7.789939876 |
| C105  | 1.108400365   | 1.593377418   | -7.751259312 |
| C106  | 2.292383886   | 2.540013508   | -7.937184767 |
| C107  | 4.576175354   | 3.184743521   | -7.410039285 |
| C108  | 5.132278517   | 3.387679939   | -8.804935512 |
| C109  | -2.765560282  | -3.499041672  | -9.178884593 |
| C110  | -3.792138252  | -2.405982885  | -8.855189261 |
| C111  | -2.274300779  | -4.164207614  | -7.872690484 |
| C112  | -1.545258400  | -5.489080868  | -8.161637865 |
| C113  | -0.876836193  | -6.014786581  | -6.911290684 |
| C114  | -4.193381322  | -0.086102421  | -8.192645893 |
| C115  | -3.715717597  | 1.198263353   | -8.841683160 |
| C116  | -4.542682741  | 0.045358437   | -6.688224263 |
| C117  | -3.303599787  | 0.050524843   | -5.834878177 |
| C118  | -2.570869811  | 1.233161981   | -5.630754767 |
| C119  | -2.785961208  | -1.159903707  | -5.344266826 |
| C120  | -1.3113131812 | 1.185120856   | -5.023734592 |
| C121  | -1.528680864  | -1.207231107  | -4.733784867 |
| C122  | -0.774975557  | -0.036177651  | -4.606510535 |
| C123  | 7.943769511   | -6.258339297  | -4.791919195 |
| C124  | 9.116058740   | -6.326975969  | -3.801883208 |
| C125  | 6.626698556   | -6.589696610  | -4.074770762 |
| C126  | 5.375007451   | -6.408274623  | -4.868280692 |
| C127  | 5.029789691   | -7.037388628  | -6.046981215 |
| C128  | 3.287809170   | -5.904951371  | -5.282963871 |
| C129  | 10.314218101  | -7.533005026  | -2.079984928 |
| C130  | 11.670133060  | -7.324768609  | -2.719014834 |
| C131  | 0.612542021   | -6.868111306  | -0.231792959 |
| C132  | 2.101925584   | -6.913710780  | 0.096692682  |
| C133  | 3.030160880   | -7.064622878  | -1.147494891 |
| C134  | 2.954517486   | -8.518362211  | -1.682499113 |
| C135  | 3.986097661   | -8.866738345  | -2.757760024 |
| C136  | 4.005310634   | -10.357053907 | -3.160482899 |
| C137  | 4.481510666   | -6.778896417  | -0.725928991 |
| C138  | 3.560156618   | -0.712479178  | -2.231915849 |
| Fe139 | 3.841628696   | -1.967925414  | -3.749050075 |
| Fe140 | 2.155737501   | 0.848707222   | -1.498402134 |
| Fe141 | 5.002142934   | 0.481958610   | -1.574103963 |
| Fe142 | 3.676323917   | 0.574839084   | -3.794985625 |
| Fe143 | 3.833783068   | 2.746289646   | -2.286050432 |
| Fe144 | 4.670704512   | -2.041702830  | -1.324867938 |
| Fe145 | 2.148389315   | -2.387547169  | -1.777134125 |
| H146  | -6.332332227  | -7.514962117  | 0.372028661  |
| H147  | -6.509639157  | -6.522901967  | -0.911530386 |
| H148  | -9.742325109  | -4.823894279  | 1.377011416  |
| H149  | -8.832839038  | -6.156551375  | -0.404505035 |
| H150  | -8.672564879  | -7.271610603  | 0.949244376  |
| H151  | -7.970881717  | -2.737090374  | 2.064172961  |
| H152  | -8.729595258  | -5.628644316  | 3.974526967  |
| H153  | -9.592039485  | -2.990450547  | 2.745059255  |
| H154  | -7.956972483  | -6.285850467  | 6.066369565  |
| H155  | -6.079350074  | -5.868931079  | 3.654828800  |
| H156  | -7.766521647  | -4.577661167  | 6.518302603  |
| H157  | -2.897173006  | -1.818482259  | 3.247183666  |
| H158  | -5.055814228  | -3.705014626  | 3.114358013  |
| H159  | -3.814345120  | -6.215678890  | 3.308440805  |
| H160  | -4.792233744  | -0.128317417  | 7.207864796  |
| H161  | -5.686998613  | -2.313395204  | 5.540994860  |
| H162  | -3.529004412  | -6.318622133  | 5.064356590  |
| H163  | -4.624494499  | -1.459419624  | 3.030926658  |
| H164  | -4.254034237  | -3.690139404  | 7.515244684  |
| H165  | -5.931246502  | -1.420320394  | 7.677693378  |
| H166  | -0.364901758  | -3.236181824  | 3.629293213  |
| H167  | -0.654731103  | -2.110557558  | 2.290755986  |
| H168  | 1.000954405   | -2.395639136  | 2.859124599  |
| H169  | -1.245544055  | -1.160755022  | 4.555529664  |
| H170  | -3.351631158  | -4.769104862  | 9.371104207  |
| H171  | -1.905035589  | 2.044520450   | 5.339556690  |
| H172  | -1.461499483  | -0.250659169  | 9.207651252  |
| H173  | -1.758647577  | 3.186314091   | 9.545695291  |
| H174  | 0.966141148   | 0.371770308   | 3.096766272  |
| H175  | -0.159206733  | 1.058459320   | 4.271212010  |
| H176  | 9.309675316   | 2.006372585   | 4.432444122  |
| H177  | -2.846020561  | 3.401217078   | 5.974809566  |
| H178  | -2.735769014  | 4.066917180   | 8.347830207  |

|      |               |              |               |
|------|---------------|--------------|---------------|
| H179 | -1.080450415  | 3.558620966  | 5.806027236   |
| H180 | -0.961731526  | 4.225070903  | 8.339317252   |
| H181 | -2.529983549  | 1.645770316  | 7.735549218   |
| H182 | 0.447323325   | 2.241318976  | 7.315525409   |
| H183 | -1.256871839  | 0.056841483  | 6.432499513   |
| H184 | -0.769309755  | 0.390466449  | 2.754376739   |
| H185 | 1.636160521   | 4.267439398  | 0.202989217   |
| H186 | 0.801612007   | 4.503171965  | 1.763274116   |
| H187 | 2.706005342   | 5.349207357  | 2.308430125   |
| H188 | 3.233461102   | 4.692580660  | 4.854931013   |
| H189 | 4.806766436   | 4.237206007  | 1.717367402   |
| H190 | 6.619339766   | 2.583243674  | 1.364240816   |
| H191 | 6.492619434   | 1.548953728  | 5.552142330   |
| H192 | -0.720722217  | -2.574110533 | 6.435495650   |
| H193 | 0.238305944   | -5.619238049 | 6.434970032   |
| H194 | 0.836891926   | -5.029538357 | 7.999648558   |
| H195 | -1.837917419  | -4.471627802 | 6.813860308   |
| H196 | -2.864824588  | -3.199759462 | 10.058153413  |
| H197 | 4.633514162   | 3.160224958  | 5.891745529   |
| H198 | 1.725985805   | -1.546297432 | 5.098041703   |
| H199 | -0.773480056  | 0.687021831  | 11.752012819  |
| H200 | -0.989096778  | -1.025250528 | 11.313324549  |
| H201 | 1.628832838   | -0.738219484 | 10.478096504  |
| H202 | 11.148676497  | -7.037913209 | 4.008876772   |
| H203 | -1.753134051  | -5.961698679 | -4.134916212  |
| H204 | 1.267873637   | -6.055236328 | -1.857117987  |
| H205 | -2.277907493  | -6.238218180 | -8.495399175  |
| H206 | -0.804692621  | -5.348765306 | -8.961917715  |
| H207 | -3.124135867  | -4.362565308 | -7.201182331  |
| H208 | -3.109516710  | 1.047048816  | -9.765794659  |
| H209 | -3.353775171  | -4.248471224 | -9.730416168  |
| H210 | -3.380866692  | -2.188532733 | -2.296992835  |
| H211 | -3.954128319  | -4.976671647 | -1.164902127  |
| H212 | -2.283892094  | -1.029641289 | -8.466631771  |
| H213 | -5.139849715  | -0.321413447 | -8.720842948  |
| H214 | -1.047947394  | -2.410948078 | -9.600928160  |
| H215 | -1.301636851  | -5.810862036 | -2.440611173  |
| H216 | -1.614195226  | -3.459918154 | -7.342766336  |
| H217 | -1.209480696  | -3.788518278 | -10.487328459 |
| H218 | -6.768781424  | -3.461857618 | -2.877331613  |
| H219 | -3.505001761  | -2.416368553 | -0.540398595  |
| H220 | 0.822222312   | -5.298431124 | -7.585337310  |
| H221 | -2.329755817  | -4.321525329 | -1.045804526  |
| H222 | -3.845709994  | 2.606524662  | 3.070038364   |
| H223 | -2.976698556  | 0.546700125  | 1.359033153   |
| H224 | -8.130086812  | 0.769471513  | 3.787909121   |
| H225 | -7.267074417  | -0.072479010 | 1.054603509   |
| H226 | -6.947791660  | 4.079112790  | 2.396077288   |
| H227 | -8.346614085  | 8.752631690  | 4.432017118   |
| H228 | -6.897432958  | 5.250241385  | 5.335782115   |
| H229 | -8.936450477  | 5.455223507  | 3.467965014   |
| H230 | -6.271309479  | 6.838533362  | 2.771330304   |
| H231 | -10.839419160 | 9.541327302  | 1.100700450   |
| H232 | -3.268949668  | 4.256956574  | 1.289340226   |
| H233 | -4.821318826  | 3.979883837  | 0.487171622   |
| H234 | -9.829679314  | 10.465142132 | 3.257316424   |
| H235 | -8.385871167  | 5.644274395  | 1.801959184   |
| H236 | -6.194402067  | 2.038400112  | 1.367310010   |
| H237 | -7.021334062  | -0.569659851 | 3.488013575   |
| H238 | -9.858704009  | 1.946264721  | -0.229267678  |
| H239 | -2.179729505  | 1.546445184  | -2.694676064  |
| H240 | -10.217653681 | 0.210402473  | -0.162817500  |
| H241 | 10.287282634  | 3.237001213  | 2.642338339   |
| H242 | 8.679663515   | 3.333576529  | 2.373112044   |
| H243 | 1.564749539   | 5.963764655  | -1.465576377  |
| H244 | -0.672316089  | 5.464418563  | 0.260385575   |
| H245 | 1.744344265   | 8.070671104  | 0.303923576   |
| H246 | -3.457120656  | 3.556143965  | -1.616326918  |
| H247 | -5.123689279  | 4.161881172  | -2.798762834  |
| H248 | -6.704953860  | 3.386551617  | -4.193611144  |
| H249 | -4.809783661  | 5.411727552  | -1.858952659  |
| H250 | -5.530330933  | 1.244788404  | -4.091816956  |
| H251 | -7.311467898  | 1.270895467  | -3.895046153  |
| H252 | -0.047186038  | 11.596347670 | -1.857723283  |
| H253 | -1.216646773  | 12.919003405 | -1.681551474  |
| H254 | -0.915015854  | 10.197784892 | -3.345501007  |
| H255 | -2.598685174  | 9.674529503  | -3.333783161  |
| H256 | -3.742054026  | 9.171708227  | -6.068007483  |
| H257 | -2.656326567  | 4.852350758  | -5.759169768  |
| H258 | -7.275403095  | 8.691383211  | -0.566014006  |

|      |              |               |               |
|------|--------------|---------------|---------------|
| H259 | -3.104992919 | 8.555918601   | 2.138015205   |
| H260 | -4.681287546 | 7.785015270   | -2.963273357  |
| H261 | 1.063453159  | 5.372286141   | -3.913160886  |
| H262 | 2.347061848  | 7.197555749   | -3.267689944  |
| H263 | -1.393567323 | 4.882727520   | -3.363412545  |
| H264 | -8.373840413 | -0.205725825  | -1.493382295  |
| H265 | 3.641329359  | 10.006330446  | -4.163882064  |
| H266 | -6.106518226 | -0.960845919  | -3.083535174  |
| H267 | 0.528600055  | 6.358502243   | -5.270868618  |
| H268 | -3.399305111 | 6.974891934   | 0.275061365   |
| H269 | 3.343247321  | 10.303204763  | -2.437059557  |
| H270 | -3.029807230 | 7.731531225   | -6.703657888  |
| H271 | -5.111831052 | 8.944088296   | -4.177206235  |
| H272 | -5.198109586 | -3.535041166  | -3.445721920  |
| H273 | -5.795117192 | -3.343933772  | -0.803814751  |
| H274 | -6.923953305 | 10.361289817  | 1.230800400   |
| H275 | -5.251152032 | 1.377323571   | -1.621989598  |
| H276 | -0.488765174 | 8.016545625   | -3.711882835  |
| H277 | -1.744693138 | 6.345989375   | -6.006180618  |
| H278 | -0.684026279 | 4.200882785   | -4.821379286  |
| H279 | -3.601243987 | 5.874976040   | -3.679327791  |
| H280 | 0.795225424  | 8.903759136   | 2.936029093   |
| H281 | -0.459502939 | 9.749838131   | 0.101765988   |
| H282 | -0.082748199 | 12.613177847  | 0.389580214   |
| H283 | 2.270029315  | 9.432311544   | 2.089132034   |
| H284 | -2.440349237 | 10.648667405  | 1.738571555   |
| H285 | 4.606080026  | -3.039118546  | -9.161294998  |
| H286 | 4.576534046  | -4.488424672  | -8.138467082  |
| H287 | 7.916471492  | -5.211687078  | -5.129501081  |
| H288 | 5.043423080  | -5.123141209  | -10.397249632 |
| H289 | 3.503690641  | -5.601019070  | -10.107456551 |
| H290 | 5.494323683  | 4.762624859   | -1.002645789  |
| H291 | 5.679445351  | 7.382560511   | 0.514365489   |
| H292 | 4.828189425  | 8.091215857   | -3.619620373  |
| H293 | 4.123014414  | 5.573322739   | -0.193075341  |
| H294 | 6.790640309  | 8.011008310   | -0.509339509  |
| H295 | 5.394000711  | 2.795515990   | -6.782657167  |
| H296 | 5.975684585  | 6.750446574   | -2.334090720  |
| H297 | 5.311179242  | -7.046253306  | 4.997108205   |
| H298 | 7.056682124  | -7.904211051  | 2.623738825   |
| H299 | 3.617417705  | 1.367493289   | -6.826195429  |
| H300 | 5.260521525  | -0.172574486  | 3.237796915   |
| H301 | 0.559452072  | 1.558543365   | -8.700149766  |
| H302 | -1.127495493 | -2.158586243  | -4.377057404  |
| H303 | 0.443525438  | 2.076344315   | -7.014133577  |
| H304 | 4.231513341  | -4.535035734  | 4.492524909   |
| H305 | 2.108420800  | 0.039308966   | -6.615400609  |
| H306 | 3.911362914  | -5.144344594  | 2.864765362   |
| H307 | 4.772847612  | -7.341814809  | 3.326605463   |
| H308 | 6.408517421  | -5.511595190  | 2.571200540   |
| H309 | 6.641549330  | -5.083397544  | 4.272541610   |
| H310 | -5.190761536 | -0.801911085  | -6.421141252  |
| H311 | 5.936937359  | -9.492720819  | 4.897452403   |
| H312 | 4.988604669  | -11.800371232 | 3.124471432   |
| H313 | 0.223034236  | -0.056967674  | -4.172889173  |
| H314 | 6.294889566  | -11.849405460 | 5.735207744   |
| H315 | 4.736026534  | -12.160869691 | 5.343576905   |
| H316 | 5.509714678  | -3.400615926  | 2.033909556   |
| H317 | -0.726779416 | 2.095803539   | -4.881565589  |
| H318 | -3.360792225 | -2.081863598  | -5.456250592  |
| H319 | 7.646259728  | -9.936051220  | -1.671573302  |
| H320 | 6.654768411  | -7.641972393  | -3.743437250  |
| H321 | 6.630159267  | -8.169528009  | -0.109850804  |
| H322 | 6.785861789  | -10.537828165 | -2.818618303  |
| H323 | 4.913953405  | 2.559634278   | -9.521378835  |
| H324 | 6.346499247  | -5.022596160  | -0.202061806  |
| H325 | 2.286562565  | -7.717809681  | 0.819873921   |
| H326 | 3.273748760  | -2.014608406  | -7.624416392  |
| H327 | 3.098749979  | -9.184491603  | -0.817241203  |
| H328 | 3.137377042  | -7.047201857  | -7.050486795  |
| H329 | 2.274152445  | -5.533710963  | -5.215697739  |
| H330 | 6.591472527  | -12.446064154 | 3.491229573   |
| H331 | 5.895958854  | -1.167945533  | 1.992387628   |
| H332 | 8.339966682  | -5.805293403  | 0.813855328   |
| H333 | 7.238668998  | -3.760543180  | -0.082388547  |
| H334 | 8.964551057  | -6.864666664  | 2.794619478   |
| H335 | 3.669175430  | -2.720223109  | 5.109163938   |
| H336 | 3.775582998  | -8.282413465  | -3.666459468  |
| H337 | 4.996069794  | -8.589106517  | -2.426582183  |
| H338 | 1.937921807  | -8.699639566  | -2.064660986  |

|       |              |               |               |
|-------|--------------|---------------|---------------|
| H339  | 1.330013385  | -2.144019589  | -6.177113653  |
| H340  | -2.974960214 | 2.183282229   | -5.987667837  |
| H341  | -5.120952394 | 0.974335601   | -6.570661976  |
| H342  | 2.325189069  | -5.957020180  | 0.598251138   |
| H343  | 8.497587587  | -7.338203469  | 0.583585369   |
| H344  | 7.394485732  | -9.260918146  | 0.672988068   |
| H345  | 4.249771446  | -1.085409040  | 5.122659980   |
| H346  | 5.595931548  | -7.696561879  | -6.692772933  |
| H347  | 6.558337889  | -5.987417364  | -3.161631340  |
| H348  | 0.451110016  | -2.941770399  | -7.514555642  |
| H349  | 4.271445084  | 4.157292969   | -6.994240489  |
| H350  | 7.783136872  | 0.154921439   | 3.925541517   |
| H351  | 7.792117098  | 0.568121473   | 2.195351049   |
| H352  | 9.025167520  | -6.821768333  | -6.440752038  |
| H353  | 8.283384513  | -8.079238186  | -5.699789260  |
| H354  | 10.306605345 | -8.545849878  | -1.647822678  |
| H355  | 8.579635364  | -8.235552669  | -3.103011795  |
| H356  | 11.709897689 | -7.564119256  | -3.809392390  |
| H357  | 10.179911644 | -6.821080717  | -1.250204220  |
| H358  | 10.551285458 | 0.336089708   | 2.158745855   |
| H359  | -2.981214761 | 13.210655135  | 3.715671897   |
| H360  | 10.227151968 | -6.874281376  | 5.526043894   |
| H361  | 9.532013953  | -4.453583953  | 4.407797354   |
| H362  | -4.706214923 | 12.318087521  | 1.398587534   |
| H363  | -4.097746024 | 10.305162832  | 3.651399517   |
| H364  | -5.685083072 | 11.004820948  | 3.286541507   |
| H365  | 1.057102127  | -3.255629909  | -1.135682563  |
| H366  | 4.536772499  | -1.613432916  | 0.096506318   |
| H367  | -6.448866143 | 6.819229816   | -1.572040139  |
| H368  | 0.245031789  | -1.027062011  | -0.371014485  |
| H369  | -1.926253656 | -0.185973239  | -0.873678940  |
| Mo370 | 3.825235342  | -4.381235714  | -2.462507582  |
| N371  | -7.012095811 | -7.187547592  | -0.318545091  |
| N372  | -8.817025229 | -4.653024538  | 1.764034331   |
| N373  | -8.169219310 | -4.949830024  | 4.484217733   |
| N374  | -5.483688587 | -5.794898261  | 4.480994297   |
| N375  | -4.233091101 | -3.403147546  | 3.632829379   |
| N376  | -4.897787410 | -1.772909666  | 5.904460068   |
| N377  | -3.668126781 | -3.123113153  | 8.134551020   |
| N378  | -1.102684431 | -4.429536199  | 7.526583013   |
| N379  | 0.261093633  | -2.520465858  | 6.169311058   |
| N380  | -0.368074935 | 0.393824332   | 6.810522667   |
| N381  | -0.677507268 | 0.209396589   | 9.676966156   |
| N382  | 5.519884930  | -11.537202562 | 5.145591424   |
| N383  | 6.397087506  | -9.284969454  | 4.004842061   |
| N384  | 4.992104788  | -3.357980331  | 2.917426224   |
| N385  | 4.283093178  | -2.007774000  | 4.698745094   |
| N386  | 5.532233364  | -1.109808936  | 2.952688248   |
| N387  | 9.040632998  | -6.976596330  | 3.8301114360  |
| N388  | -5.881822216 | -2.956045597  | -2.923251997  |
| N389  | -1.944828378 | -5.574960204  | -3.204214778  |
| N390  | -6.096410847 | -0.451024044  | -2.183803154  |
| N391  | -8.356300739 | 0.664449709   | -0.965769506  |
| N392  | -7.851395844 | 0.355069418   | 1.781106614   |
| N393  | -5.705477281 | 2.098655547   | 2.265289746   |
| N394  | -3.127678490 | 2.695728924   | -1.106258319  |
| N395  | -2.426886376 | 0.693989416   | -0.726243995  |
| N396  | -6.334071584 | 4.731366677   | 2.878179711   |
| N397  | -9.760046003 | 7.739900280   | 1.591825277   |
| N398  | -9.665619921 | 9.525460580   | 2.905720763   |
| N399  | 9.469430272  | 2.682214703   | 2.377799280   |
| N400  | 6.260388660  | 7.161008708   | -0.300813069  |
| N401  | 4.209118300  | 8.449790527   | -2.897391693  |
| N402  | 1.556164276  | 7.842695747   | -3.371826657  |
| N403  | -3.176613334 | 6.402702468   | -4.463060047  |
| N404  | -3.365857004 | 8.244506575   | -5.895727039  |
| N405  | -4.454096314 | 8.241690401   | -3.850033790  |
| N406  | 0.677090781  | 6.331613978   | -1.083649480  |
| N407  | 0.980910206  | 8.222048356   | 0.970101910   |
| N408  | -0.371229185 | 10.601636628  | 0.655489076   |
| N409  | -1.889942099 | 10.351323802  | -3.058148219  |
| N410  | -2.749777882 | 11.616953524  | 1.705471092   |
| N411  | 4.095226721  | -4.775476769  | -10.237828798 |
| N412  | 2.456318406  | -2.570965798  | -7.891405286  |
| N413  | 1.405399328  | 0.229988927   | -7.349753760  |
| N414  | 3.484587528  | 2.223505054   | -7.372046009  |
| N415  | -1.729017568 | -3.002035791  | -10.092230472 |
| N416  | -3.296287197 | -1.179979637  | -8.518984413  |
| N417  | 8.153866860  | -7.102425944  | -5.981710915  |
| N418  | 4.272905355  | -5.688854737  | -4.409653158  |

|                          |                                        |               |              |             |
|--------------------------|----------------------------------------|---------------|--------------|-------------|
| N419                     | 3.715193078                            | -6.704984484  | -6.287252167 |             |
| N420                     | 9.241460824                            | -7.456259074  | -3.053852984 |             |
| N421                     | 0.147397743                            | 2.225547698   | 0.161551678  |             |
| N422                     | 2.346503502                            | -0.646386696  | 1.124796747  |             |
| N423                     | 0.934269587                            | 1.753314471   | -0.502275622 |             |
| N424                     | 2.799736644                            | -0.586877273  | 2.138942875  |             |
| O425                     | -6.594616000                           | -5.133185947  | 1.658563803  |             |
| O426                     | -7.306585144                           | -2.838060528  | 4.498976627  |             |
| O427                     | -5.327219940                           | -5.217004508  | 6.683991377  |             |
| O428                     | -2.459432868                           | -4.024430853  | 4.920304111  |             |
| O429                     | -3.039734115                           | -0.560401902  | 5.423362989  |             |
| O430                     | -3.273206802                           | -1.034788630  | 8.987067298  |             |
| O431                     | -0.552395577                           | -4.061510919  | 9.720151691  |             |
| O432                     | 2.193177929                            | -3.767875774  | 6.057537240  |             |
| O433                     | 1.914858863                            | 0.310942431   | 6.693276340  |             |
| O434                     | 0.828065839                            | 1.909262256   | 9.739168482  |             |
| O435                     | 1.525667414                            | -0.295542163  | 12.466397271 |             |
| O436                     | 7.050791034                            | -10.342988041 | 2.055439283  |             |
| O437                     | 8.034318512                            | -7.704465114  | 5.765904084  |             |
| O438                     | 11.565244497                           | -4.524546850  | 4.541485429  |             |
| O439                     | -5.646246154                           | -0.848619532  | 0.029960935  |             |
| O440                     | -3.725180929                           | -4.414330368  | -4.013915293 |             |
| O441                     | -7.120633313                           | 2.505542482   | -0.418398937 |             |
| O442                     | -6.337865717                           | 3.040042526   | -3.360763038 |             |
| O443                     | -9.771756459                           | 1.510850797   | 2.276216784  |             |
| O444                     | -5.619411025                           | 1.463977543   | 4.459040312  |             |
| O445                     | -4.252556795                           | 5.056663994   | 3.760435502  |             |
| O446                     | -6.570759788                           | 7.265554144   | 5.341123930  |             |
| O447                     | 10.787685629                           | -0.055697790  | 4.148890083  |             |
| O448                     | 3.582917043                            | 4.713117376   | 3.945052200  |             |
| O449                     | 3.600732571                            | 8.370753727   | -0.703328194 |             |
| O450                     | 0.985491509                            | 10.066295354  | -3.532749616 |             |
| O451                     | -1.393481619                           | 7.187466440   | -1.536913408 |             |
| O452                     | -0.684018755                           | 7.161484001   | 2.141887201  |             |
| O453                     | 2.466707585                            | 5.722243903   | 1.435834894  |             |
| O454                     | 0.846180199                            | 11.604105443  | 2.317337194  |             |
| O455                     | -2.504777823                           | 13.580223832  | 0.572025113  |             |
| O456                     | -3.262145274                           | 11.011977983  | -1.353218987 |             |
| O457                     | -4.958485908                           | 13.709019627  | 3.615707924  |             |
| O458                     | -5.503751725                           | 6.843525825   | -1.326340802 |             |
| O459                     | 1.748838376                            | -4.573701471  | -8.766688872 |             |
| O460                     | -0.281229480                           | -0.739204724  | -8.562802617 |             |
| O461                     | 2.119845095                            | 3.606147739   | -8.551308554 |             |
| O462                     | 5.802692833                            | 4.354209711   | -9.126190564 |             |
| O463                     | -5.012490193                           | -2.636185328  | -8.879104413 |             |
| O464                     | -1.486357155                           | -6.593728853  | -6.018214943 |             |
| O465                     | 0.444294897                            | -5.778094046  | -6.784887287 |             |
| O466                     | -3.994906188                           | 2.321100000   | -8.444295258 |             |
| O467                     | 9.947345555                            | -5.403028335  | -3.705269483 |             |
| O468                     | 12.670907879                           | -6.988736403  | -2.102808103 |             |
| O469                     | 0.310651594                            | -6.256476832  | -1.383256116 |             |
| O470                     | -0.254908863                           | -7.306163757  | 0.522331163  |             |
| O471                     | 5.154686308                            | -10.896570069 | -3.339729672 |             |
| O472                     | 2.893713113                            | -10.936630467 | -3.317265934 |             |
| O473                     | 5.081609584                            | -5.793569103  | -1.339725926 |             |
| O474                     | 5.033693310                            | -7.480318968  | 0.143677825  |             |
| O475                     | 2.622869709                            | -6.113612628  | -2.135506137 |             |
| O476                     | 8.933733588                            | -6.563226989  | 1.036343907  |             |
| O477                     | 6.957193001                            | -4.548804399  | 0.420565104  |             |
| O478                     | -4.392666460                           | 4.748428321   | -2.463423109 |             |
| O479                     | 7.737367544                            | -10.428746895 | -2.517317965 |             |
| O480                     | 7.505423866                            | -8.639995693  | -0.091483460 |             |
| S481                     | 3.547600878                            | 4.979344881   | -2.470080130 |             |
| S482                     | 2.013410865                            | 2.049980626   | -3.401007921 |             |
| S483                     | 2.084948035                            | -3.359213723  | -3.740315452 |             |
| S484                     | 3.792228777                            | 1.840024496   | -0.253392193 |             |
| S485                     | 0.550962782                            | -0.801168589  | -1.682518252 |             |
| S486                     | 4.008381209                            | -0.752723805  | -5.574252072 |             |
| S487                     | 3.362752462                            | -3.489714074  | -0.323948567 |             |
| S488                     | 5.610087395                            | 1.731592344   | -3.297151912 |             |
| S489                     | 5.685488498                            | -3.054369692  | -3.092018554 |             |
| S490                     | 6.445330989                            | -0.809386259  | -0.564969771 |             |
| end                      |                                        |               |              |             |
| transition state (S=3/2) | <b>bm526hx7hnexp2n2ndte_1_53280.90</b> |               |              |             |
| Fe( 139) -2.205          | C1                                     | -7.750439094  | -5.373579717 | 1.287030760 |
| Fe( 140) 0.081           | C2                                     | -8.128369250  | -6.521630374 | 0.343220315 |
| Fe( 141) -2.415          | C3                                     | -8.587097040  | -3.454777833 | 2.573165606 |
| Fe( 142) 2.297           | C4                                     | -7.947823765  | -3.715522904 | 3.933904428 |
|                          | C5                                     | -7.515259223  | -5.309743282 | 5.738478977 |
|                          | C6                                     | -5.989747287  | -5.425150833 | 5.668996515 |

|                |     |               |               |              |
|----------------|-----|---------------|---------------|--------------|
| Fe( 143) 2.717 | C7  | -4.016708367  | -5.737124603  | 4.270096471  |
| Fe( 144) 1.221 | C8  | -3.482242681  | -4.302789340  | 4.297905941  |
| Fe( 145) 1.304 | C9  | -3.897176791  | -1.974637429  | 3.637593154  |
|                | C10 | -3.903955606  | -1.354824479  | 5.043625830  |
|                | C11 | -4.935697244  | -1.191499980  | 7.219500849  |
|                | C12 | -3.868423764  | -1.750444978  | 8.171935653  |
|                | C13 | -2.869325608  | -3.771067942  | 9.140271188  |
|                | C14 | -1.399849582  | -4.075514266  | 8.816344249  |
|                | C15 | 0.242578480   | -4.781795388  | 7.120897015  |
|                | C16 | 0.987557271   | -3.647388085  | 6.408163296  |
|                | C17 | 0.682270048   | -1.384114553  | 5.419960619  |
|                | C18 | 0.790535524   | -0.170006202  | 6.357909410  |
|                | C19 | -0.209458116  | -1.163219617  | 4.170778204  |
|                | C20 | -0.007439912  | 0.208389914   | 3.515078388  |
|                | C21 | -0.039136938  | -2.316884299  | 3.171706685  |
|                | C22 | -0.371959346  | 1.569956318   | 7.639893608  |
|                | C23 | -0.013571008  | 1.242456998   | 9.099916776  |
|                | C24 | -1.704051787  | 2.345007353   | 7.498163470  |
|                | C25 | -1.776946793  | 3.513345979   | 8.487465189  |
|                | C26 | -1.879811767  | 2.853991930   | 6.060774011  |
|                | C27 | -0.422381966  | -0.095538277  | 11.076106853 |
|                | C28 | 1.041298600   | -0.371612949  | 11.357499672 |
|                | C29 | 5.895681838   | -11.613728100 | 3.738425828  |
|                | C30 | 6.513294570   | -10.333296243 | 3.188132909  |
|                | C31 | 6.790886529   | -7.911193228  | 3.685304965  |
|                | C32 | 8.014874074   | -7.519216815  | 4.532582258  |
|                | C33 | 5.612832868   | -6.954464641  | 3.927865943  |
|                | C34 | 5.941273131   | -5.513082169  | 3.550193779  |
|                | C35 | 4.689091583   | -4.641252947  | 3.491790934  |
|                | C36 | 4.906057717   | -2.142414102  | 3.503035756  |
|                | C37 | 10.2698885874 | -6.560872195  | 4.475706511  |
|                | C38 | 10.479160380  | -5.063718833  | 4.466779493  |
|                | C39 | -5.349541989  | -2.682292872  | -1.573668744 |
|                | C40 | -5.711105575  | -1.247492686  | -1.142666675 |
|                | C41 | -3.811676336  | -2.825283345  | -1.507844842 |
|                | C42 | -3.254582219  | -4.258869963  | -1.624957979 |
|                | C43 | -2.985661555  | -4.746949853  | -3.049260871 |
|                | C44 | -6.187312988  | 0.992428190   | -2.050968958 |
|                | C45 | -7.272782642  | 1.455175772   | -1.068663601 |
|                | C46 | -6.360943939  | 1.602217888   | -3.447696162 |
|                | C47 | -9.427270273  | 0.944745389   | -0.017373049 |
|                | C48 | -9.027870681  | 0.959333396   | 1.461286853  |
|                | C49 | -7.323735021  | 0.432896867   | 3.140745318  |
|                | C50 | -6.150593114  | 1.390816482   | 3.354770392  |
|                | C51 | -4.614653946  | 3.053322993   | 2.429496113  |
|                | C52 | -5.052312480  | 4.362846284   | 3.127346907  |
|                | C53 | -4.028521001  | 3.487889255   | 1.077823195  |
|                | C54 | -3.413313594  | 2.426479671   | 0.228634347  |
|                | C55 | -2.969480266  | 1.149744179   | 0.463943590  |
|                | C56 | -2.556590370  | 1.623140021   | -1.673925998 |
|                | C57 | -6.856979476  | 6.038357508   | 3.251370732  |
|                | C58 | -6.758115478  | 6.198152947   | 4.767327732  |
|                | C59 | -8.332872493  | 6.095339639   | 2.791566621  |
|                | C60 | -8.950090121  | 7.458048971   | 2.669968545  |
|                | C61 | -8.879966860  | 8.562117324   | 3.497276551  |
|                | C62 | -10.190250586 | 8.982005456   | 1.760430369  |
|                | C63 | 9.239316150   | 1.638371403   | 3.412300691  |
|                | C64 | 10.277936137  | 0.544331650   | 3.243331435  |
|                | C65 | 7.848960565   | 0.985855796   | 3.233032792  |
|                | C66 | 6.713047961   | 1.957685869   | 3.450816375  |
|                | C67 | 6.133982670   | 2.142395626   | 4.718888124  |
|                | C68 | 6.209815381   | 2.720404657   | 2.381162446  |
|                | C69 | 5.086752532   | 3.050869146   | 4.915835151  |
|                | C70 | 5.181808358   | 3.644433388   | 2.565525401  |
|                | C71 | 4.613471679   | 3.801776177   | 3.831910797  |
|                | C72 | 5.370864717   | 6.854542940   | -1.418992525 |
|                | C73 | 4.318026283   | 7.957612844   | -1.623718614 |
|                | C74 | 4.697121145   | 5.507486871   | -1.162089631 |
|                | C75 | 3.307242924   | 9.547214720   | -3.220393365 |
|                | C76 | 1.832935049   | 9.166517292   | -3.381072036 |
|                | C77 | 0.216096825   | 7.268976650   | -3.341433955 |
|                | C78 | -0.239832535  | 6.924880143   | -1.900089940 |
|                | C79 | 0.242580698   | 6.022740686   | -4.254682921 |
|                | C80 | -1.011685528  | 5.146512373   | -4.357610399 |
|                | C81 | -2.157172150  | 5.683010030   | -5.232654186 |
|                | C82 | -3.679739269  | 7.602067573   | -4.752724108 |
|                | C83 | 0.298622962   | 5.975887608   | 0.291515356  |
|                | C84 | 0.127443318   | 7.192679944   | 1.212859547  |
|                | C85 | 1.311555945   | 5.021885869   | 0.958815873  |
|                | C86 | 1.193911467   | 9.261063185   | 1.967642467  |

|       |              |               |              |
|-------|--------------|---------------|--------------|
| C87   | 0.549702704  | 10.605260636  | 1.663860733  |
| C88   | -0.856539336 | 11.874902625  | 0.131703655  |
| C89   | -2.132195598 | 12.431120848  | 0.809335077  |
| C90   | -1.008901430 | 11.881879399  | -1.391601180 |
| C91   | -2.157887533 | 11.022486055  | -1.903651207 |
| C92   | -4.076489623 | 11.952773032  | 2.222276706  |
| C93   | -3.992287540 | 13.055945686  | 3.269330103  |
| C94   | -4.735361342 | 10.686057911  | 2.835621323  |
| C95   | -4.974781440 | 9.612333095   | 1.799058095  |
| C96   | -6.151580446 | 9.613724341   | 1.034990527  |
| C97   | -4.012131899 | 8.626284257   | 1.529581805  |
| C98   | -6.354678013 | 8.677361978   | 0.019942581  |
| C99   | -4.186265022 | 7.696012279   | 0.500099597  |
| C100  | -5.358118207 | 7.738760857   | -0.249411378 |
| C101  | 4.086432527  | -3.986636812  | -8.991730836 |
| C102  | 2.659237120  | -3.727921120  | -8.541603585 |
| C103  | 1.199199640  | -2.185544429  | -7.254311328 |
| C104  | 0.698571751  | -0.832683227  | -7.774192201 |
| C105  | 1.114102420  | 1.591722147   | -7.737557076 |
| C106  | 2.294729860  | 2.542400493   | -7.928080295 |
| C107  | 4.577046822  | 3.193949417   | -7.404997584 |
| C108  | 5.149146960  | 3.379441246   | -8.796408986 |
| C109  | -2.760574730 | -3.495595160  | -9.163954866 |
| C110  | -3.787667139 | -2.404088518  | -8.837939946 |
| C111  | -2.270487560 | -4.166266827  | -7.860338254 |
| C112  | -1.542453421 | -5.490255543  | -8.156058470 |
| C113  | -0.871164488 | -6.020337749  | -6.909254329 |
| C114  | -4.190923055 | -0.085678678  | -8.176197221 |
| C115  | -3.714284305 | 1.198746134   | -8.825220216 |
| C116  | -4.552302939 | 0.045474751   | -6.675180475 |
| C117  | -3.314011684 | 0.053656308   | -5.822113504 |
| C118  | -2.583562114 | 1.238214167   | -5.621133665 |
| C119  | -2.787893241 | -1.157355998  | -5.343045742 |
| C120  | -1.317244555 | 1.191002016   | -5.027953185 |
| C121  | -1.522766903 | -1.204277410  | -4.749300641 |
| C122  | -0.771759104 | -0.031453248  | -4.623693800 |
| C123  | 7.927906816  | -6.247185806  | -4.781546712 |
| C124  | 9.104355022  | -6.324222665  | -3.797633219 |
| C125  | 6.612043738  | -6.593925397  | -4.070749069 |
| C126  | 5.362522704  | -6.404864433  | -4.866081585 |
| C127  | 5.015924128  | -7.023721138  | -6.049621007 |
| C128  | 3.274524234  | -5.898214417  | -5.274708009 |
| C129  | 10.308948536 | -7.538182105  | -2.085598807 |
| C130  | 11.662346121 | -7.325523678  | -2.727953858 |
| C131  | 0.604522638  | -6.877660115  | -0.220481949 |
| C132  | 2.094098139  | -6.924936161  | 0.104054005  |
| C133  | 3.017801421  | -7.063517920  | -1.144846309 |
| C134  | 2.941063529  | -8.513859265  | -1.688206219 |
| C135  | 3.972879786  | -8.860620438  | -2.763202382 |
| C136  | 3.992237725  | -10.351224896 | -3.164083476 |
| C137  | 4.469767079  | -6.778023018  | -0.722947763 |
| C138  | 3.570194255  | -0.702251408  | -2.224315483 |
| Fe139 | 3.857060918  | -1.963592146  | -3.731599573 |
| Fe140 | 2.197751518  | 0.680524746   | -1.288492425 |
| Fe141 | 5.025629114  | 0.472705634   | -1.568324400 |
| Fe142 | 3.676092870  | 0.552659160   | -3.745689953 |
| Fe143 | 3.879141733  | 2.722840906   | -2.388560798 |
| Fe144 | 4.667836030  | -2.068681889  | -1.298510094 |
| Fe145 | 2.156181904  | -2.398860670  | -1.798750707 |
| H146  | -6.352084778 | -7.526404630  | 0.354531532  |
| H147  | -6.527477090 | -6.531601742  | -0.927517291 |
| H148  | -9.728225456 | -4.808819514  | 1.380284548  |
| H149  | -8.843189348 | -6.141468483  | -0.404579782 |
| H150  | -8.685251723 | -7.258627470  | 0.947525277  |
| H151  | -7.935276811 | -2.735741514  | 2.055355762  |
| H152  | -8.700317632 | -5.619710839  | 3.969293736  |
| H153  | -9.558488537 | -2.969319457  | 2.736871604  |
| H154  | -7.930234127 | -6.272285371  | 6.064573088  |
| H155  | -6.057567042 | -5.852461947  | 3.651512884  |
| H156  | -7.737124986 | -4.562962165  | 6.511815660  |
| H157  | -2.898509197 | -1.798727912  | 3.216970351  |
| H158  | -5.034609925 | -3.703156589  | 3.085324007  |
| H159  | -3.784577916 | -6.200392521  | 3.301715080  |
| H160  | -4.787407547 | -0.104455006  | 7.177412746  |
| H161  | -5.675364929 | -2.302474848  | 5.522234968  |
| H162  | -3.499336743 | -6.297496327  | 5.057599974  |
| H163  | -4.629387050 | -1.454613322  | 3.003851860  |
| H164  | -4.241545024 | -3.663583642  | 7.500767813  |
| H165  | -5.926138248 | -1.395310152  | 7.650312430  |
| H166  | -0.339996044 | -3.276769370  | 3.614347382  |

|      |               |              |               |
|------|---------------|--------------|---------------|
| H167 | -0.673077295  | -2.154017199 | 2.284795961   |
| H168 | 0.999069688   | -2.407731357 | 2.821805513   |
| H169 | -1.246705552  | -1.184037159 | 4.531655750   |
| H170 | -3.360067279  | -4.725670313 | 9.381603290   |
| H171 | -1.886221026  | 2.036401240  | 5.327969814   |
| H172 | -1.459331082  | -0.254412137 | 9.217047318   |
| H173 | -1.741801509  | 3.180934277  | 9.534742721   |
| H174 | 0.901431285   | 0.250571202  | 2.909883557   |
| H175 | 0.045993257   | 1.023573840  | 4.248125177   |
| H176 | 9.312106827   | 1.997945778  | 4.456825474   |
| H177 | -2.833179186  | 3.392486457  | 5.959864663   |
| H178 | -2.717056766  | 4.064440432  | 8.338144546   |
| H179 | -1.066675448  | 3.551683896  | 5.800153220   |
| H180 | -0.942547230  | 4.214263377  | 8.325871523   |
| H181 | -2.527250100  | 1.643700973  | 7.726324604   |
| H182 | 0.453078640   | 2.212095569  | 7.296129017   |
| H183 | -1.271222338  | 0.041688143  | 6.424095197   |
| H184 | -0.857847727  | 0.428301628  | 2.852079240   |
| H185 | 1.624608141   | 4.266162541  | 0.223248996   |
| H186 | 0.782006356   | 4.512929298  | 1.777169843   |
| H187 | 2.697846977   | 5.345153211  | 2.322005981   |
| H188 | 3.223194375   | 4.684649113  | 4.861091378   |
| H189 | 4.794818966   | 4.219176345  | 1.723543837   |
| H190 | 6.613060978   | 2.570043023  | 1.377089865   |
| H191 | 6.498421113   | 1.560875730  | 5.570679206   |
| H192 | -0.756831447  | -2.621917216 | 6.380561659   |
| H193 | 0.227309076   | -5.644917374 | 6.439875200   |
| H194 | 0.829360222   | -5.060009816 | 8.005590065   |
| H195 | -1.851189273  | -4.507491701 | 6.827854069   |
| H196 | -2.857909729  | -3.151064350 | 10.044755721  |
| H197 | 4.636278864   | 3.169363982  | 5.905350675   |
| H198 | 1.711660263   | -1.588070692 | 5.106130739   |
| H199 | -0.763748507  | 0.707239035  | 11.749744190  |
| H200 | -0.980131889  | -1.010084341 | 11.330257157  |
| H201 | 1.634379195   | -0.731624908 | 10.484780470  |
| H202 | 11.145895046  | -7.050791359 | 4.023506058   |
| H203 | -1.750255433  | -5.969914373 | -4.128540516  |
| H204 | 1.269392783   | -6.047265379 | -1.839812706  |
| H205 | -2.275742397  | -6.238225962 | -8.491314235  |
| H206 | -0.803478241  | -5.347002265 | -8.957421208  |
| H207 | -3.121419208  | -4.367590071 | -7.191055771  |
| H208 | -3.105618722  | 1.046894061  | -9.747732339  |
| H209 | -3.348793090  | -4.243293477 | -9.718301756  |
| H210 | -3.367795557  | -2.192042951 | -2.294638407  |
| H211 | -3.954315951  | -4.977301163 | -1.164210727  |
| H212 | -2.279856582  | -1.028809671 | -8.445272522  |
| H213 | -5.134059006  | -0.321685530 | -8.711155964  |
| H214 | -1.041721408  | -2.407046681 | -9.583837947  |
| H215 | -1.303647322  | -5.821953692 | -2.432057988  |
| H216 | -1.610287082  | -3.465494540 | -7.325707482  |
| H217 | -1.207750992  | -3.780828079 | -10.476870532 |
| H218 | -6.756025422  | -3.463854316 | -2.869681268  |
| H219 | -3.492349707  | -2.419365235 | -0.536371880  |
| H220 | 0.825888927   | -5.301327549 | -7.585644950  |
| H221 | -2.326577369  | -4.331376598 | -1.039719386  |
| H222 | -3.842812367  | 2.609649307  | 3.074155183   |
| H223 | -2.993217095  | 0.540132720  | 1.358376402   |
| H224 | -8.136426136  | 0.771958674  | 3.797813842   |
| H225 | -7.266977449  | -0.073471453 | 1.067204721   |
| H226 | -6.943473327  | 4.081148729  | 2.385092519   |
| H227 | -8.341503821  | 8.750238509  | 4.418750143   |
| H228 | -6.908523609  | 5.243791919  | 5.329226002   |
| H229 | -8.939426262  | 5.446109579  | 3.447986427   |
| H230 | -6.274509449  | 6.840425749  | 2.771506003   |
| H231 | -10.857710167 | 9.532532506  | 1.103337428   |
| H232 | -3.264082098  | 4.252383410  | 1.290578921   |
| H233 | -4.819874602  | 3.982278578  | 0.491957052   |
| H234 | -9.834556601  | 10.459969491 | 3.252126783   |
| H235 | -8.378880267  | 5.646323581  | 1.786727321   |
| H236 | -6.186342342  | 2.029044467  | 1.370275141   |
| H237 | -7.018002312  | -0.560136415 | 3.502264880   |
| H238 | -9.864727730  | 1.931648690  | -0.223932901  |
| H239 | -2.219890293  | 1.525908590  | -2.703550976  |
| H240 | -10.217151166 | 0.194911557  | -0.154538976  |
| H241 | 10.292755356  | 3.225919378  | 2.665028995   |
| H242 | 8.684725221   | 3.324280286  | 2.394011788   |
| H243 | 1.564287734   | 5.976785652  | -1.458160034  |
| H244 | -0.679379055  | 5.473280712  | 0.267834416   |
| H245 | 1.741507224   | 8.076472053  | 0.304801084   |
| H246 | -3.471000111  | 3.548812427  | -1.619001479  |



|      |              |               |               |
|------|--------------|---------------|---------------|
| H247 | -5.124718509 | 4.163132724   | -2.798305421  |
| H248 | -6.711935711 | 3.386968171   | -4.182456037  |
| H249 | -4.805688344 | 5.410592544   | -1.858625579  |
| H250 | -5.533513630 | 1.246127955   | -4.083398103  |
| H251 | -7.314587468 | 1.271076593   | -3.886651640  |
| H252 | -0.054923712 | 11.602845558  | -1.860385492  |
| H253 | -1.232316522 | 12.919002263  | -1.686982021  |
| H254 | -0.914507006 | 10.187566450  | -3.335810467  |
| H255 | -2.595212582 | 9.652723470   | -3.317793751  |
| H256 | -3.716533812 | 9.185951321   | -6.055513157  |
| H257 | -2.653873939 | 4.850322669   | -5.753576511  |
| H258 | -7.281959716 | 8.682950901   | -0.558957371  |
| H259 | -3.101144342 | 8.561316027   | 2.129841893   |
| H260 | -4.690574379 | 7.777589022   | -2.965877517  |
| H261 | 1.063259074  | 5.378187330   | -3.900678748  |
| H262 | 2.346434733  | 7.197827472   | -3.263568025  |
| H263 | -1.394587642 | 4.883840779   | -3.359093760  |
| H264 | -8.373939888 | -0.212470631  | -1.488733386  |
| H265 | 3.638981910  | 10.013980138  | -4.157536776  |
| H266 | -6.104564880 | -0.961727944  | -3.076417243  |
| H267 | 0.532511656  | 6.359616305   | -5.263435699  |
| H268 | -3.397065526 | 6.979442769   | 0.268741756   |
| H269 | 3.339361728  | 10.312977701  | -2.431799775  |
| H270 | -2.983499267 | 7.750387167   | -6.687066188  |
| H271 | -5.112428966 | 8.943876088   | -4.174815736  |
| H272 | -5.186663389 | -3.530664047  | -3.443011173  |
| H273 | -5.782334108 | -3.342354972  | -0.798952673  |
| H274 | -6.929417824 | 10.354149155  | 1.235867460   |
| H275 | -5.255696527 | 1.378504729   | -1.613452217  |
| H276 | -0.487635405 | 8.022444767   | -3.708003269  |
| H277 | -1.742783116 | 6.342867547   | -6.005216840  |
| H278 | -0.681612652 | 4.203472317   | -4.815241305  |
| H279 | -3.602795686 | 5.874459584   | -3.680274946  |
| H280 | 0.799725497  | 8.916410869   | 2.935367458   |
| H281 | -0.462577020 | 9.758141968   | 0.102002851   |
| H282 | -0.088858621 | 12.622706790  | 0.383853351   |
| H283 | 2.271043476  | 9.441704997   | 2.081557300   |
| H284 | -2.444720937 | 10.655091509  | 1.737121238   |
| H285 | 4.609306213  | -3.031427427  | -9.145507184  |
| H286 | 4.581517029  | -4.488345682  | -8.133347792  |
| H287 | 7.894987917  | -5.196425452  | -5.105742364  |
| H288 | 5.048846596  | -5.106332487  | -10.395512324 |
| H289 | 3.508848197  | -5.586121820  | -10.111649572 |
| H290 | 5.488610485  | 4.763743118   | -1.006403085  |
| H291 | 5.672823511  | 7.393070501   | 0.526251124   |
| H292 | 4.826051185  | 8.096927444   | -3.613338617  |
| H293 | 4.077479886  | 5.567708818   | -0.256396601  |
| H294 | 6.801651191  | 7.999293566   | -0.490831637  |
| H295 | 5.388579797  | 2.816752014   | -6.763095931  |
| H296 | 5.995084944  | 6.774700952   | -2.322545486  |
| H297 | 5.306691606  | -7.020370233  | 4.984995574   |
| H298 | 7.054520888  | -7.894787728  | 2.619904380   |
| H299 | 3.619399434  | 1.386954680   | -6.797069046  |
| H300 | 5.205362312  | -0.140395510  | 3.197413342   |
| H301 | 0.559099053  | 1.559425393   | -8.682937784  |
| H302 | -1.112229259 | -2.156018562  | -4.404342158  |
| H303 | 0.452212463  | 2.070364337   | -6.994880254  |
| H304 | 4.253569860  | -4.510220876  | 4.489386207   |
| H305 | 2.116884693  | 0.039732416   | -6.603092964  |
| H306 | 3.921602719  | -5.115891813  | 2.860280156   |
| H307 | 4.773086958  | -7.315886361  | 3.312863110   |
| H308 | 6.418034110  | -5.495030487  | 2.559205375   |
| H309 | 6.656233714  | -5.069921146  | 4.261245726   |
| H310 | -5.199490858 | -0.803660490  | -6.411827563  |
| H311 | 5.931320420  | -9.474488502  | 4.898565434   |
| H312 | 4.988826455  | -11.792482054 | 3.140911308   |
| H313 | 0.232284010  | -0.054669259  | -4.203546474  |
| H314 | 6.310332952  | -11.825636205 | 5.744402354   |
| H315 | 4.751874783  | -12.152330069 | 5.362539963   |
| H316 | 5.528501338  | -3.377262325  | 2.028719943   |
| H317 | -0.735120926 | 2.103402346   | -4.886944510  |
| H318 | -3.361539165 | -2.080000936  | -5.454320737  |
| H319 | 7.633502167  | -9.936674032  | -1.670962740  |
| H320 | 6.642323269  | -7.650726074  | -3.754138606  |
| H321 | 6.623348370  | -8.170366413  | -0.109560447  |
| H322 | 6.770929372  | -10.534815818 | -2.818136366  |
| H323 | 4.928138902  | 2.549776909   | -9.510126716  |
| H324 | 6.339466447  | -5.027524425  | -0.199343743  |
| H325 | 2.282713609  | -7.736971647  | 0.816681052   |
| H326 | 3.277717244  | -2.011510136  | -7.615841251  |

|       |              |               |              |
|-------|--------------|---------------|--------------|
| H327  | 3.080771687  | -9.185423177  | -0.826885991 |
| H328  | 3.121992541  | -7.027466096  | -7.049928824 |
| H329  | 2.261032560  | -5.527644557  | -5.199924854 |
| H330  | 6.596436332  | -12.432718808 | 3.501766632  |
| H331  | 5.850046753  | -1.141968111  | 1.954151716  |
| H332  | 8.343466906  | -5.806607945  | 0.809848145  |
| H333  | 7.244817946  | -3.773528225  | -0.100456780 |
| H334  | 8.967607823  | -6.863117916  | 2.794764006  |
| H335  | 3.673336365  | -2.704994812  | 5.093145023  |
| H336  | 3.761269581  | -8.276408435  | -3.671625472 |
| H337  | 4.982095009  | -8.581630787  | -2.431142906 |
| H338  | 1.924753056  | -8.689721705  | -2.073046514 |
| H339  | 1.327532462  | -2.151315161  | -6.160590889 |
| H340  | -2.995817004 | 2.187640822   | -5.971390164 |
| H341  | -5.133614494 | 0.972963283   | -6.562091655 |
| H342  | 2.319077799  | -5.974026516  | 0.615576439  |
| H343  | 8.498605698  | -7.339079795  | 0.583573784  |
| H344  | 7.390884322  | -9.257893785  | 0.675746096  |
| H345  | 4.189098692  | -1.053395064  | 5.077332974  |
| H346  | 5.583358930  | -7.672862538  | -6.703766003 |
| H347  | 6.537898205  | -6.005466902  | -3.148687535 |
| H348  | 0.455061896  | -2.943460305  | -7.505731253 |
| H349  | 4.265385296  | 4.172208344   | -7.008304004 |
| H350  | 7.774626925  | 0.151849348   | 3.945972882  |
| H351  | 7.793716835  | 0.564931702   | 2.216365945  |
| H352  | 9.009686895  | -6.781369703  | -6.439794386 |
| H353  | 8.277288111  | -8.053559124  | -5.714703062 |
| H354  | 10.302713477 | -8.553075184  | -1.658433444 |
| H355  | 8.564770634  | -8.231640589  | -3.098907468 |
| H356  | 11.699971655 | -7.561794190  | -3.819086505 |
| H357  | 10.176796032 | -6.830292334  | -1.251887922 |
| H358  | 10.545113141 | 0.323754955   | 2.181373666  |
| H359  | -2.983582223 | 13.206004502  | 3.721195129  |
| H360  | 10.214284779 | -6.872890361  | 5.533654623  |
| H361  | 9.546450762  | -4.452519400  | 4.402128170  |
| H362  | -4.712757173 | 12.323969066  | 1.401592324  |
| H363  | -4.096303415 | 10.306314676  | 3.648251050  |
| H364  | -5.686448042 | 11.002018097  | 3.288012040  |
| H365  | 1.100249887  | -3.305961022  | -1.213153540 |
| H366  | 4.557913532  | -1.672479985  | 0.130022579  |
| H367  | -6.451070993 | 6.812589525   | -1.569499547 |
| H368  | 0.148809789  | -1.163805832  | -0.352525526 |
| H369  | -1.966480986 | -0.206062925  | -0.881109954 |
| Mo370 | 3.826796403  | -4.381174128  | -2.472914102 |
| N371  | -7.032552402 | -7.191929215  | -0.331955707 |
| N372  | -8.800291303 | -4.643177590  | 1.762829779  |
| N373  | -8.141323284 | -4.939774215  | 4.479107799  |
| N374  | -5.457899478 | -5.789763458  | 4.475880541  |
| N375  | -4.221776584 | -3.391827427  | 3.613953577  |
| N376  | -4.888725884 | -1.754938280  | 5.881275669  |
| N377  | -3.660499070 | -3.093141817  | 8.121464872  |
| N378  | -1.114430123 | -4.462775508  | 7.538172899  |
| N379  | 0.234263114  | -2.554737969  | 6.155966152  |
| N380  | -0.378671027 | 0.368627098   | 6.802442370  |
| N381  | -0.672912709 | 0.207865082   | 9.680232818  |
| N382  | 5.529070518  | -11.522248042 | 5.158418962  |
| N383  | 6.385664294  | -9.268740142  | 4.002653086  |
| N384  | 5.013397198  | -3.336088219  | 2.913075216  |
| N385  | 4.271550912  | -1.983627286  | 4.677922362  |
| N386  | 5.488050754  | -1.074871852  | 2.914201630  |
| N387  | 9.039706032  | -6.974099406  | 3.830759044  |
| N388  | -5.871300253 | -2.954570573  | -2.918216557 |
| N389  | -1.945092096 | -5.585789462  | -3.197513928 |
| N390  | -6.094301416 | -0.451831934  | -2.176663759 |
| N391  | -8.356802071 | 0.654582589   | -0.956083653 |
| N392  | -7.852591259 | 0.354395642   | 1.792253212  |
| N393  | -5.701807080 | 2.095905741   | 2.270132154  |
| N394  | -3.144881464 | 2.686030851   | -1.109438646 |
| N395  | -2.454770313 | 0.680044433   | -0.729857800 |
| N396  | -6.332616140 | 4.733087426   | 2.871213457  |
| N397  | -9.771829610 | 7.733439656   | 1.588438938  |
| N398  | -9.671697463 | 9.520054458   | 2.900519037  |
| N399  | 9.473832294  | 2.672312533   | 2.401797881  |
| N400  | 6.255683683  | 7.158299181   | -0.283880500 |
| N401  | 4.213677613  | 8.462217295   | -2.888680235 |
| N402  | 1.557006770  | 7.845674747   | -3.363090194 |
| N403  | -3.175705527 | 6.403382723   | -4.461753379 |
| N404  | -3.365342092 | 8.247972277   | -5.890708834 |
| N405  | -4.455922893 | 8.240251350   | -3.847549853 |
| N406  | 0.674752052  | 6.333470118   | -1.078600809 |

|      |              |               |               |
|------|--------------|---------------|---------------|
| N407 | 0.977821503  | 8.229920711   | 0.969796062   |
| N408 | -0.373237158 | 10.610460797  | 0.654634804   |
| N409 | -1.890215976 | 10.335967565  | -3.048389694  |
| N410 | -2.754716307 | 11.623037655  | 1.703754641   |
| N411 | 4.100374499  | -4.759465682  | -10.235430219 |
| N412 | 2.461415325  | -2.572879425  | -7.871848486  |
| N413 | 1.415397690  | 0.227592856   | -7.341276328  |
| N414 | 3.488520418  | 2.230868659   | -7.363846036  |
| N415 | -1.724497211 | -2.995433528  | -10.076164274 |
| N416 | -3.292360280 | -1.179000329  | -8.497967008  |
| N417 | 8.141011941  | -7.073943586  | -5.983210486  |
| N418 | 4.261328146  | -5.688641583  | -4.402292536  |
| N419 | 3.700688384  | -6.690543901  | -6.285177205  |
| N420 | 9.231777184  | -7.456626175  | -3.054609960  |
| N421 | 0.096906089  | 2.316967581   | -0.053451163  |
| N422 | 2.524610552  | -0.519207633  | 0.998113613   |
| N423 | 0.948738998  | 1.695970834   | -0.461759232  |
| N424 | 2.757109570  | -0.749016297  | 2.061643647   |
| O425 | -6.581849128 | -5.139541962  | 1.643566974   |
| O426 | -7.285117240 | -2.825579047  | 4.495301693   |
| O427 | -5.298108447 | -5.203920194  | 6.676914519   |
| O428 | -2.453139534 | -3.994896759  | 4.918404220   |
| O429 | -3.040983972 | -0.530831614  | 5.383582279   |
| O430 | -3.280353014 | -0.999772718  | 8.969974721   |
| O431 | -0.546755556 | -4.011621936  | 9.710153780   |
| O432 | 2.185568523  | -3.775554632  | 6.091145006   |
| O433 | 1.902647749  | 0.273140270   | 6.683159573   |
| O434 | 0.840276094  | 1.900656577   | 9.717344647   |
| O435 | 1.537113763  | -0.271376220  | 12.469272809  |
| O436 | 7.051548695  | -10.335355323 | 2.062328596   |
| O437 | 8.022856137  | -7.692796352  | 5.764331816   |
| O438 | 11.578511075 | -4.537825809  | 4.544234309   |
| O439 | -5.634738978 | -0.847914553  | 0.035663328   |
| O440 | -3.712586579 | -4.408322304  | -4.01281230   |
| O441 | -7.127067038 | 2.500048007   | -0.409293540  |
| O442 | -6.342398500 | 3.040177441   | -3.350815193  |
| O443 | -9.779385199 | 1.501337670   | 2.282527868   |
| O444 | -5.643110551 | 1.498415500   | 4.474760404   |
| O445 | -4.257059081 | 5.054639383   | 3.769237903   |
| O446 | -6.582745823 | 7.259253210   | 5.340578400   |
| O447 | 10.785821437 | -0.069405162  | 4.170458418   |
| O448 | 3.570893430  | 4.701598736   | 3.950483101   |
| O449 | 3.606433619  | 8.376457172   | -0.694009375  |
| O450 | 0.984960663  | 10.068233905  | -3.525044746  |
| O451 | -1.395966759 | 7.186384600   | -1.533816741  |
| O452 | -0.688930212 | 7.174941241   | 2.143451539   |
| O453 | 2.453418865  | 5.725737844   | 1.453664283   |
| O454 | 0.849102314  | 11.615574293  | 2.311457354   |
| O455 | -2.511386909 | 13.586482481  | 0.570748497   |
| O456 | -3.266394551 | 11.003426053  | -1.349583470  |
| O457 | -4.958461390 | 13.712988828  | 3.620986526   |
| O458 | -5.505594100 | 6.838793783   | -1.325106949  |
| O459 | 1.753815950  | -4.568921707  | -8.761104706  |
| O460 | -0.281978346 | -0.739555240  | -8.541891377  |
| O461 | 2.117064764  | 3.605591985   | -8.546351781  |
| O462 | 5.835048496  | 4.335439974   | -9.117877568  |
| O463 | -5.007927175 | -2.634863353  | -8.864221420  |
| O464 | -1.478569852 | -6.600117754  | -6.015366670  |
| O465 | 0.450637294  | -5.785844772  | -6.786994804  |
| O466 | -3.999428283 | 2.321490264   | -8.431607547  |
| O467 | 9.941060793  | -5.404720382  | -3.705391542  |
| O468 | 12.663968695 | -6.990326538  | -2.112422787  |
| O469 | 0.302213433  | -6.252254797  | -1.362529373  |
| O470 | -0.260020465 | -7.326434728  | 0.532207467   |
| O471 | 5.141575594  | -10.891989158 | -3.340623624  |
| O472 | 2.880783038  | -10.931102267 | -3.321185166  |
| O473 | 5.072388601  | -5.789068631  | -1.325632742  |
| O474 | 5.021819411  | -7.487210997  | 0.141343356   |
| O475 | 2.604455596  | -6.108641255  | -2.126144500  |
| O476 | 8.937227576  | -6.564361905  | 1.034321330   |
| O477 | 6.961308943  | -4.553929842  | 0.413451470   |
| O478 | -4.390730904 | 4.746499692   | -2.463652291  |
| O479 | 7.723061634  | -10.428723526 | -2.517287835  |
| O480 | 7.500000177  | -8.639247411  | -0.090581685  |
| S481 | 3.621645459  | 4.972435262   | -2.573897824  |
| S482 | 1.947757544  | 1.874857818   | -3.224130553  |
| S483 | 2.094864875  | -3.356547711  | -3.759744832  |
| S484 | 3.909692311  | 1.934218468   | -0.315582329  |
| S485 | 0.505261834  | -0.886073683  | -1.641167194  |
| S486 | 4.000472057  | -0.684786568  | -5.543416267  |

|                                |      |                                 |               |              |
|--------------------------------|------|---------------------------------|---------------|--------------|
|                                | S487 | 3.322577210                     | -3.500742059  | -0.330810860 |
|                                | S488 | 5.601659177                     | 1.652731755   | -3.387400189 |
|                                | S489 | 5.690464894                     | -3.047739923  | -3.070513875 |
|                                | S490 | 6.469601427                     | -0.822691490  | -0.585650375 |
|                                | end  |                                 |               |              |
| <b>product Fe2-N-N (S=3/2)</b> |      | <b>bm526hx7hnexp2n2n3.car_5</b> |               |              |
| Fe( 139) -2.196                | C1   | -7.753334463                    | -5.376553190  | 1.292458809  |
| Fe( 140) 0.085                 | C2   | -8.125229943                    | -6.525679002  | 0.348345007  |
| Fe( 141) -2.492                | C3   | -8.595942619                    | -3.460010635  | 2.578410123  |
| Fe( 142) 2.372                 | C4   | -7.955451368                    | -3.720959898  | 3.938722564  |
| Fe( 143) 3.016                 | C5   | -7.523618210                    | -5.315786186  | 5.743338389  |
| Fe( 144) 1.130                 | C6   | -5.998054864                    | -5.430262107  | 5.673780709  |
| Fe( 145) 0.974                 | C7   | -4.024189836                    | -5.743606093  | 4.275382903  |
|                                | C8   | -3.485390852                    | -4.310942880  | 4.304179184  |
|                                | C9   | -3.896208327                    | -1.980824957  | 3.649343662  |
|                                | C10  | -3.903800850                    | -1.362818760  | 5.056063430  |
|                                | C11  | -4.936962892                    | -1.201078089  | 7.231236221  |
|                                | C12  | -3.868899387                    | -1.761762222  | 8.181778252  |
|                                | C13  | -2.870709485                    | -3.784258099  | 9.146946894  |
|                                | C14  | -1.400828053                    | -4.085898503  | 8.822287576  |
|                                | C15  | 0.242999420                     | -4.777484238  | 7.122974283  |
|                                | C16  | 0.983498463                     | -3.642371509  | 6.408536505  |
|                                | C17  | 0.676577749                     | -1.375719404  | 5.431855462  |
|                                | C18  | 0.785530503                     | -0.162102468  | 6.368865672  |
|                                | C19  | -0.200584409                    | -1.153185141  | 4.173738396  |
|                                | C20  | 0.039614640                     | 0.209595855   | 3.513655657  |
|                                | C21  | -0.020019454                    | -2.305140082  | 3.175750060  |
|                                | C22  | -0.376751770                    | 1.575564541   | 7.653077660  |
|                                | C23  | -0.019656344                    | 1.246247045   | 9.113518525  |
|                                | C24  | -1.708697973                    | 2.349324980   | 7.507992519  |
|                                | C25  | -1.783323726                    | 3.517956752   | 8.496148598  |
|                                | C26  | -1.882254687                    | 2.856345056   | 6.069576807  |
|                                | C27  | -0.427987795                    | -0.097206053  | 11.087482613 |
|                                | C28  | 1.036003328                     | -0.375812002  | 11.365603074 |
|                                | C29  | 5.898163267                     | -11.620369470 | 3.740698776  |
|                                | C30  | 6.515414155                     | -10.338750611 | 3.191336279  |
|                                | C31  | 6.793965725                     | -7.916339326  | 3.690074311  |
|                                | C32  | 8.018432496                     | -7.525427492  | 4.537762459  |
|                                | C33  | 5.616286649                     | -6.958354382  | 3.932601032  |
|                                | C34  | 5.945500639                     | -5.517033306  | 3.552824392  |
|                                | C35  | 4.695522645                     | -4.641963974  | 3.489177730  |
|                                | C36  | 4.875099437                     | -2.139052262  | 3.462149518  |
|                                | C37  | 10.273872991                    | -6.565775138  | 4.480485070  |
|                                | C38  | 10.479045309                    | -5.067787063  | 4.471778732  |
|                                | C39  | -5.351519837                    | -2.684143097  | -1.572730022 |
|                                | C40  | -5.712342103                    | -1.249147042  | -1.142114405 |
|                                | C41  | -3.813461343                    | -2.826775565  | -1.506066256 |
|                                | C42  | -3.255049773                    | -4.259863648  | -1.623015770 |
|                                | C43  | -2.986687783                    | -4.748167617  | -3.047269462 |
|                                | C44  | -6.185823925                    | 0.991102855   | -2.051015235 |
|                                | C45  | -7.270565674                    | 1.455551801   | -1.068661686 |
|                                | C46  | -6.359017368                    | 1.600471463   | -3.447998673 |
|                                | C47  | -9.425333691                    | 0.947507845   | -0.016633471 |
|                                | C48  | -9.025187033                    | 0.960464213   | 1.461838525  |
|                                | C49  | -7.321552051                    | 0.429570820   | 3.140325050  |
|                                | C50  | -6.147085339                    | 1.385598179   | 3.354710684  |
|                                | C51  | -4.616080483                    | 3.054339177   | 2.432072948  |
|                                | C52  | -5.052877383                    | 4.364230356   | 3.130348760  |
|                                | C53  | -4.029303189                    | 3.489102285   | 1.080694380  |
|                                | C54  | -3.413450074                    | 2.428344310   | 0.231323303  |
|                                | C55  | -2.966032846                    | 1.152635940   | 0.466625983  |
|                                | C56  | -2.557532600                    | 1.626623577   | -1.672341535 |
|                                | C57  | -6.859046833                    | 6.039040308   | 3.259392898  |
|                                | C58  | -6.757279204                    | 6.199515632   | 4.774996941  |
|                                | C59  | -8.334814769                    | 6.095612681   | 2.800173713  |
|                                | C60  | -8.950325111                    | 7.458664519   | 2.676674057  |
|                                | C61  | -8.880210147                    | 8.562740725   | 3.503916168  |
|                                | C62  | -10.186005420                   | 8.984305828   | 1.764120900  |
|                                | C63  | 9.244021151                     | 1.639612762   | 3.417883316  |
|                                | C64  | 10.282778463                    | 0.546431298   | 3.246365661  |
|                                | C65  | 7.853007221                     | 0.985760972   | 3.236290870  |
|                                | C66  | 6.717097069                     | 1.957602628   | 3.452991517  |
|                                | C67  | 6.135132153                     | 2.139738873   | 4.719944334  |
|                                | C68  | 6.217001801                     | 2.723289853   | 2.384258056  |
|                                | C69  | 5.088291851                     | 3.048651023   | 4.916857035  |
|                                | C70  | 5.189464121                     | 3.648093794   | 2.568631832  |
|                                | C71  | 4.618439669                     | 3.803061905   | 3.833812316  |
|                                | C72  | 5.376192798                     | 6.852728344   | -1.420007155 |
|                                | C73  | 4.323654021                     | 7.957763777   | -1.622925338 |
|                                | C74  | 4.695911581                     | 5.508409590   | -1.181267558 |

|       |              |               |              |
|-------|--------------|---------------|--------------|
| C75   | 3.310174506  | 9.547597194   | -3.218214312 |
| C76   | 1.836206434  | 9.164691548   | -3.379527777 |
| C77   | 0.219231864  | 7.267356336   | -3.340837102 |
| C78   | -0.235865611 | 6.923381891   | -1.898974604 |
| C79   | 0.245018067  | 6.020723720   | -4.254174797 |
| C80   | -1.009372815 | 5.144469444   | -4.355986531 |
| C81   | -2.155331951 | 5.681162155   | -5.230435458 |
| C82   | -3.678022898 | 7.599742724   | -4.750219157 |
| C83   | 0.306729275  | 5.973856018   | 0.292105455  |
| C84   | 0.132395614  | 7.189819921   | 1.214218858  |
| C85   | 1.323455729  | 5.022573981   | 0.958548570  |
| C86   | 1.194785707  | 9.259190210   | 1.971450841  |
| C87   | 0.550167673  | 10.603594577  | 1.668988212  |
| C88   | -0.855444227 | 11.875346402  | 0.137097861  |
| C89   | -2.131672021 | 12.431720430  | 0.813292034  |
| C90   | -1.005485147 | 11.881687455  | -1.386496921 |
| C91   | -2.155275636 | 11.024342223  | -1.900565546 |
| C92   | -4.076651541 | 11.954674596  | 2.226391649  |
| C93   | -3.992201009 | 13.057583146  | 3.273421765  |
| C94   | -4.734875440 | 10.687174155  | 2.839267770  |
| C95   | -4.973412167 | 9.613002106   | 1.802700411  |
| C96   | -6.149173545 | 9.615052795   | 1.037073787  |
| C97   | -4.011401409 | 8.625752147   | 1.534978365  |
| C98   | -6.351750019 | 8.678479831   | 0.022157114  |
| C99   | -4.185186154 | 7.695061088   | 0.505726412  |
| C100  | -5.355994448 | 7.738581266   | -0.245292913 |
| C101  | 4.087128982  | -3.987415027  | -8.979330431 |
| C102  | 2.658089099  | -3.728786972  | -8.535916302 |
| C103  | 1.193443688  | -2.185520203  | -7.257039987 |
| C104  | 0.693381897  | -0.832980745  | -7.777430939 |
| C105  | 1.111236937  | 1.591656515   | -7.739374332 |
| C106  | 2.294876834  | 2.539688022   | -7.924396084 |
| C107  | 4.578102591  | 3.185278581   | -7.397075251 |
| C108  | 5.144547084  | 3.378070879   | -8.790335060 |
| C109  | -2.753932726 | -3.495790659  | -9.158958039 |
| C110  | -3.781058529 | -2.404023355  | -8.834981326 |
| C111  | -2.265285388 | -4.166269980  | -7.855266180 |
| C112  | -1.540395329 | -5.491651384  | -8.151956610 |
| C113  | -0.869733605 | -6.022409899  | -6.905479776 |
| C114  | -4.183884809 | -0.085862283  | -8.173994000 |
| C115  | -3.709112408 | 1.198430270   | -8.824083406 |
| C116  | -4.548726358 | 0.045032004   | -6.674011580 |
| C117  | -3.312131757 | 0.050915209   | -5.818951400 |
| C118  | -2.579080856 | 1.233914381   | -5.617732756 |
| C119  | -2.790052822 | -1.161393854  | -5.338975364 |
| C120  | -1.314346264 | 1.183689873   | -5.021757333 |
| C121  | -1.526212078 | -1.210950775  | -4.742953418 |
| C122  | -0.773085383 | -0.039948130  | -4.616062836 |
| C123  | 7.933076459  | -6.251630768  | -4.780776220 |
| C124  | 9.108196366  | -6.326260746  | -3.795278893 |
| C125  | 6.616294133  | -6.593143963  | -4.068561391 |
| C126  | 5.367176552  | -6.407342884  | -4.865550035 |
| C127  | 5.021338154  | -7.031841584  | -6.046456862 |
| C128  | 3.279484014  | -5.901425723  | -5.278846555 |
| C129  | 10.311030957 | -7.536858300  | -2.080632058 |
| C130  | 11.665357864 | -7.326663021  | -2.722268454 |
| C131  | 0.607511040  | -6.869289326  | -0.222609292 |
| C132  | 2.097526828  | -6.915470353  | 0.102179236  |
| C133  | 3.021657454  | -7.056168327  | -1.145826411 |
| C134  | 2.946395058  | -8.508913032  | -1.684161515 |
| C135  | 3.978598562  | -8.858795262  | -2.757928579 |
| C136  | 3.996810607  | -10.350075860 | -3.157358522 |
| C137  | 4.471341343  | -6.765144493  | -0.722247345 |
| C138  | 3.569038087  | -0.703968772  | -2.211600932 |
| Fe139 | 3.867273713  | -1.966210118  | -3.750113721 |
| Fe140 | 2.156878635  | 0.609688601   | -1.121282523 |
| Fe141 | 5.013622507  | 0.488107069   | -1.579815092 |
| Fe142 | 3.687394002  | 0.534237550   | -3.764636735 |
| Fe143 | 3.876864308  | 2.746797996   | -2.435817017 |
| Fe144 | 4.686733098  | -2.060708131  | -1.317091712 |
| Fe145 | 2.181576788  | -2.323680967  | -1.836797881 |
| H146  | -6.345294810 | -7.524178902  | 0.364016934  |
| H147  | -6.520917465 | -6.530307085  | -0.918593332 |
| H148  | -9.732197121 | -4.816055454  | 1.382221624  |
| H149  | -8.839419569 | -6.148053044  | -0.401310284 |
| H150  | -8.680638855 | -7.264382516  | 0.951818526  |
| H151  | -7.946997555 | -2.737634520  | 2.061612893  |
| H152  | -8.709352963 | -5.624797949  | 3.974835156  |
| H153  | -9.569608710 | -2.979389226  | 2.742641499  |
| H154  | -7.938400279 | -6.278828535  | 6.068659683  |

|      |               |              |               |
|------|---------------|--------------|---------------|
| H155 | -6.063667252  | -5.859648786 | 3.655268541   |
| H156 | -7.745931939  | -4.569953924 | 6.517556242   |
| H157 | -2.896184138  | -1.807430576 | 3.231066098   |
| H158 | -5.042203349  | -3.705044191 | 3.100682002   |
| H159 | -3.794078421  | -6.206639676 | 3.306326609   |
| H160 | -4.788408353  | -0.113991324 | 7.190871126   |
| H161 | -5.677365014  | -2.308750851 | 5.531970491   |
| H162 | -3.508306236  | -6.306455569 | 5.062170519   |
| H163 | -4.625917248  | -1.457997850 | 3.015026746   |
| H164 | -4.245276191  | -3.674042030 | 7.509797532   |
| H165 | -5.927161829  | -1.405458639 | 7.662312560   |
| H166 | -0.308043680  | -3.269785048 | 3.617153943   |
| H167 | -0.659300292  | -2.146619015 | 2.291922129   |
| H168 | 1.018543369   | -2.373496015 | 2.820129941   |
| H169 | -1.243424277  | -1.161926990 | 4.518703645   |
| H170 | -3.359864962  | -4.740702093 | 9.384039424   |
| H171 | -1.888273575  | 2.038059578  | 5.337368339   |
| H172 | -1.462344442  | -0.254089808 | 9.225901206   |
| H173 | -1.748517386  | 3.185388657  | 9.543390853   |
| H174 | 0.993369849   | 0.235055980  | 2.972892136   |
| H175 | 0.034686366   | 1.035735623  | 4.236973130   |
| H176 | 9.316738617   | 1.999749068  | 4.461992634   |
| H177 | -2.835315732  | 3.395013125  | 5.966815716   |
| H178 | -2.723514522  | 4.068523075  | 8.346020181   |
| H179 | -1.068575386  | 3.553392310  | 5.808914042   |
| H180 | -0.948808748  | 4.218796099  | 8.334755206   |
| H181 | -2.531470550  | 1.647281622  | 7.735199905   |
| H182 | 0.449119983   | 2.217569264  | 7.310870542   |
| H183 | -1.274991844  | 0.047866775  | 6.435574140   |
| H184 | -0.765267873  | 0.413359185  | 2.791307792   |
| H185 | 1.641131300   | 4.270383192  | 0.220913346   |
| H186 | 0.795726118   | 4.508905241  | 1.775320413   |
| H187 | 2.707043020   | 5.348196144  | 2.324000694   |
| H188 | 3.226993763   | 4.685653121  | 4.862073421   |
| H189 | 4.804577681   | 4.225069289  | 1.727134943   |
| H190 | 6.621055915   | 2.574403992  | 1.380342155   |
| H191 | 6.496382889   | 1.555011721  | 5.570837392   |
| H192 | -0.757892516  | -2.610675852 | 6.404706609   |
| H193 | 0.230214586   | -5.641653418 | 6.443531632   |
| H194 | 0.830309101   | -5.052566080 | 8.008202553   |
| H195 | -1.850337561  | -4.501322825 | 6.829291604   |
| H196 | -2.860563860  | -3.167559580 | 10.053763648  |
| H197 | 4.635345837   | 3.164609625  | 5.905614626   |
| H198 | 1.707789515   | -1.578582827 | 5.120937781   |
| H199 | -0.767984198  | 0.703898322  | 11.763652154  |
| H200 | -0.985850105  | -1.012547528 | 11.338376706  |
| H201 | 1.627510628   | -0.733647995 | 10.490860724  |
| H202 | 11.150304913  | -7.053092927 | 4.026240163   |
| H203 | -1.748972024  | -5.968358807 | -4.127262372  |
| H204 | 1.274472598   | -6.043965480 | -1.845423563  |
| H205 | -2.275872838  | -6.237398585 | -8.487309071  |
| H206 | -0.801701373  | -5.349439388 | -8.953721221  |
| H207 | -3.117118056  | -4.366316068 | -7.186794737  |
| H208 | -3.101532881  | 1.046584406  | -9.747326851  |
| H209 | -3.342623066  | -4.244205015 | -9.711851329  |
| H210 | -3.368947652  | -2.193135713 | -2.292244501  |
| H211 | -3.953422862  | -4.978829318 | -1.161154979  |
| H212 | -2.272884872  | -1.028983018 | -8.443574227  |
| H213 | -5.126242323  | -0.322186137 | -8.710483264  |
| H214 | -1.036468431  | -2.406977907 | -9.583991222  |
| H215 | -1.300893544  | -5.818207275 | -2.431351831  |
| H216 | -1.604243694  | -3.467222670 | -7.319699068  |
| H217 | -1.202749014  | -3.783452557 | -10.473648502 |
| H218 | -6.758442632  | -3.464182271 | -2.868483988  |
| H219 | -3.494793769  | -2.420786696 | -0.534295606  |
| H220 | 0.827666911   | -5.303241876 | -7.581221630  |
| H221 | -2.326631160  | -4.331555892 | -1.038220102  |
| H222 | -3.844563349  | 2.609881532  | 3.076509623   |
| H223 | -2.985203976  | 0.542588980  | 1.361020171   |
| H224 | -8.133483027  | 0.769141417  | 3.798070515   |
| H225 | -7.265963248  | -0.074878439 | 1.066399095   |
| H226 | -6.946136213  | 4.080547370  | 2.394809025   |
| H227 | -8.343329544  | 8.750220676  | 4.426451877   |
| H228 | -6.906087521  | 5.245337892  | 5.337659356   |
| H229 | -8.940974948  | 5.447929966  | 3.458291206   |
| H230 | -6.276120451  | 6.840198119  | 2.778557399   |
| H231 | -10.850759784 | 9.535842514  | 1.105170156   |
| H232 | -3.265570213  | 4.254146572  | 1.294026958   |
| H233 | -4.820549854  | 3.983157599  | 0.494485763   |
| H234 | -9.831620415  | 10.461869956 | 3.256490709   |

|      |               |               |               |
|------|---------------|---------------|---------------|
| H235 | -8.381565362  | 5.644542197   | 1.796263060   |
| H236 | -6.188971871  | 2.032181764   | 1.372780092   |
| H237 | -7.017134916  | -0.564137311  | 3.500882325   |
| H238 | -9.861500650  | 1.935231010   | -0.222321667  |
| H239 | -2.219527515  | 1.530421220   | -2.701648101  |
| H240 | -10.216310197 | 0.198786126   | -0.154166044  |
| H241 | 10.294596204  | 3.228625851   | 2.667924547   |
| H242 | 8.686023367   | 3.323293603   | 2.396813447   |
| H243 | 1.571581270   | 5.980983861   | -1.458631136  |
| H244 | -0.670476207  | 5.469512229   | 0.268115044   |
| H245 | 1.745366638   | 8.077015339   | 0.307821293   |
| H246 | -3.475058425  | 3.550584825   | -1.616867281  |
| H247 | -5.124528281  | 4.161992314   | -2.796291555  |
| H248 | -6.709281899  | 3.384943407   | -4.183684480  |
| H249 | -4.806331354  | 5.409890885   | -1.856122074  |
| H250 | -5.531587467  | 1.244011128   | -4.083482843  |
| H251 | -7.312737118  | 1.269460146   | -3.886863539  |
| H252 | -0.051363214  | 11.600430595  | -1.853763219  |
| H253 | -1.226370059  | 12.919000315  | -1.683103023  |
| H254 | -0.912738664  | 10.190368572  | -3.334639272  |
| H255 | -2.594713400  | 9.659847183   | -3.319517517  |
| H256 | -3.722876839  | 9.179098557   | -6.0567123852 |
| H257 | -2.652189883  | 4.848663271   | -5.751446709  |
| H258 | -7.277927712  | 8.684929148   | -0.558521227  |
| H259 | -3.101155936  | 8.560221407   | 2.136402556   |
| H260 | -4.685856774  | 7.778312675   | -2.961913350  |
| H261 | 1.066004774   | 5.376300174   | -3.901050887  |
| H262 | 2.349495050   | 7.193954817   | -3.262464616  |
| H263 | -1.391869203  | 4.882784129   | -3.357033253  |
| H264 | -8.372608632  | -0.211968621  | -1.486110384  |
| H265 | 3.641188457   | 10.015001265  | -4.155264325  |
| H266 | -6.105558201  | -0.963712103  | -3.075983803  |
| H267 | 0.534191829   | 6.357849076   | -5.263060229  |
| H268 | -3.396443918  | 6.977609695   | 0.275702136   |
| H269 | 3.340340219   | 10.313936474  | -2.430183215  |
| H270 | -2.997422086  | 7.741457654   | -6.689270274  |
| H271 | -5.110446524  | 8.942161082   | -4.172660768  |
| H272 | -5.188954117  | -3.534134190  | -3.441129985  |
| H273 | -5.784298735  | -3.344287835  | -0.797923034  |
| H274 | -6.926493346  | 10.356399497  | 1.236387291   |
| H275 | -5.253697667  | 1.376069452   | -1.613420568  |
| H276 | -0.485211041  | 8.020489497   | -3.706944025  |
| H277 | -1.741390251  | 6.341671278   | -6.002688509  |
| H278 | -0.680347034  | 4.200558105   | -4.812476607  |
| H279 | -3.600306196  | 5.872686984   | -3.677149500  |
| H280 | 0.799326725   | 8.912991126   | 2.938036930   |
| H281 | -0.461969164  | 9.758581923   | 0.106115184   |
| H282 | -0.087461885  | 12.622466711  | 0.390163209   |
| H283 | 2.271625136   | 9.440243134   | 2.087229610   |
| H284 | -2.444775163  | 10.656327069  | 1.742018270   |
| H285 | 4.610523824   | -3.032368632  | -9.132927093  |
| H286 | 4.579479083   | -4.489489377  | -8.119603622  |
| H287 | 7.902223956   | -5.202333449  | -5.109781800  |
| H288 | 5.052324897   | -5.108951015  | -10.381215222 |
| H289 | 3.511240750   | -5.587175986  | -10.100662285 |
| H290 | 5.478591914   | 4.754930596   | -1.029758369  |
| H291 | 5.671899822   | 7.384637089   | 0.529659226   |
| H292 | 4.825626112   | 8.094132825   | -3.613182643  |
| H293 | 4.070612241   | 5.560860596   | -0.278846991  |
| H294 | 6.802471546   | 7.993258855   | -0.483462611  |
| H295 | 5.392035177   | 2.802109872   | -6.761740636  |
| H296 | 6.005887846   | 6.779397627   | -2.320352958  |
| H297 | 5.310942828   | -7.023288724  | 4.990020222   |
| H298 | 7.057949762   | -7.899403639  | 2.624744912   |
| H299 | 3.620677991   | 1.372566950   | -6.804727597  |
| H300 | 5.119178422   | -0.132886657  | 3.138217801   |
| H301 | 0.560799966   | 1.561166207   | -8.687459892  |
| H302 | -1.117973556  | -2.163284339  | -4.396871925  |
| H303 | 0.447929409   | 2.072114765   | -6.999375037  |
| H304 | 4.261924778   | -4.503690576  | 4.486799977   |
| H305 | 2.109576037   | 0.037243110   | -6.604947908  |
| H306 | 3.925132466   | -5.120744410  | 2.863857830   |
| H307 | 4.776077354   | -7.320504931  | 3.318691158   |
| H308 | 6.424538679   | -5.501207893  | 2.563067650   |
| H309 | 6.659080662   | -5.073272145  | 4.264835694   |
| H310 | -5.197473962  | -0.803563459  | -6.412775367  |
| H311 | 5.934881541   | -9.480709970  | 4.902712120   |
| H312 | 4.992921743   | -11.799524979 | 3.140907684   |
| H313 | 0.229642140   | -0.061608111  | -4.192301304  |
| H314 | 6.307634263   | -11.836398983 | 5.746959999   |

|       |              |               |              |
|-------|--------------|---------------|--------------|
| H315  | 4.749126054  | -12.157582786 | 5.361410187  |
| H316  | 5.524825268  | -3.388577048  | 2.008252885  |
| H317  | -0.728232463 | 2.093300866   | -4.878559242 |
| H318  | -3.365463146 | -2.082760935  | -5.451628386 |
| H319  | 7.639022040  | -9.937140098  | -1.667826192 |
| H320  | 6.646372906  | -7.648277163  | -3.746250047 |
| H321  | 6.626094160  | -8.171612840  | -0.108211575 |
| H322  | 6.776583054  | -10.534174634 | -2.815449363 |
| H323  | 4.924220439  | 2.549721342   | -9.505969518 |
| H324  | 6.3441822783 | -5.025170285  | -0.193456297 |
| H325  | 2.286004987  | -7.726579298  | 0.815874184  |
| H326  | 3.271797054  | -2.012080962  | -7.605993647 |
| H327  | 3.088055512  | -9.176782567  | -0.820072670 |
| H328  | 3.128750700  | -7.039962028  | -7.048716076 |
| H329  | 2.266120166  | -5.529557833  | -5.206044256 |
| H330  | 6.600095479  | -12.438604695 | 3.504814795  |
| H331  | 5.809110950  | -1.129128362  | 1.910450295  |
| H332  | 8.344759354  | -5.810264187  | 0.815451483  |
| H333  | 7.249913413  | -3.773698126  | -0.092039162 |
| H334  | 8.970885944  | -6.868687008  | 2.800462234  |
| H335  | 3.656705610  | -2.707374622  | 5.066610921  |
| H336  | 3.768505412  | -8.275915560  | -3.667562405 |
| H337  | 4.988105008  | -8.580557800  | -2.425994395 |
| H338  | 1.930344185  | -8.688404743  | -2.068783052 |
| H339  | 1.323061079  | -2.151302396  | -6.163436753 |
| H340  | -2.988166131 | 2.183949457   | -5.970150154 |
| H341  | -5.129210104 | 0.973128952   | -6.561731794 |
| H342  | 2.322371648  | -5.963992968  | 0.612670644  |
| H343  | 8.500949767  | -7.342484704  | 0.588993220  |
| H344  | 7.390248346  | -9.260827863  | 0.679231446  |
| H345  | 4.169113312  | -1.052138459  | 5.046022088  |
| H346  | 5.588485444  | -7.684323377  | -6.697744831 |
| H347  | 6.541873879  | -5.999248530  | -3.149948313 |
| H348  | 0.450123154  | -2.944758897  | -7.507250030 |
| H349  | 4.270250307  | 4.161908136   | -6.993612298 |
| H350  | 7.776694010  | 0.150701103   | 3.948013698  |
| H351  | 7.800599655  | 0.566143792   | 2.218971933  |
| H352  | 9.013991668  | -6.795598932  | -6.436305296 |
| H353  | 8.280101102  | -8.063075753  | -5.704789920 |
| H354  | 10.304487395 | -8.550911992  | -1.651558334 |
| H355  | 8.569956181  | -8.234497368  | -3.096563168 |
| H356  | 11.703721124 | -7.564553193  | -3.813123729 |
| H357  | 10.178737050 | -6.827306046  | -1.248411373 |
| H358  | 10.547306869 | 0.327160687   | 2.183316092  |
| H359  | -2.983326383 | 13.208207926  | 3.724636376  |
| H360  | 10.220879258 | -6.878390634  | 5.538329978  |
| H361  | 9.544407953  | -4.459287892  | 4.408886428  |
| H362  | -4.712814163 | 12.325745278  | 1.405598117  |
| H363  | -4.095751334 | 10.307574635  | 3.651951734  |
| H364  | -5.686309473 | 11.002321345  | 3.291484848  |
| H365  | 1.133612615  | -3.281388603  | -1.314466790 |
| H366  | 4.580773287  | -1.705084195  | 0.133331047  |
| H367  | -6.448413665 | 6.813722734   | -1.566787445 |
| H368  | 0.079295498  | -1.300323542  | -0.369814444 |
| H369  | -1.955105760 | -0.197591359  | -0.878648218 |
| Mo370 | 3.821772714  | -4.368785909  | -2.487473343 |
| N371  | -7.025338379 | -7.192083458  | -0.324037738 |
| N372  | -8.805223356 | -4.648389203  | 1.766361251  |
| N373  | -8.150103983 | -4.944927359  | 4.484384109  |
| N374  | -5.465642985 | -5.792192389  | 4.480397500  |
| N375  | -4.224676873 | -3.397059411  | 3.623876810  |
| N376  | -4.890508394 | -1.762271322  | 5.892023951  |
| N377  | -3.662479823 | -3.104608117  | 8.129783361  |
| N378  | -1.114244118 | -4.461349357  | 7.540885648  |
| N379  | 0.230196073  | -2.547226650  | 6.166695808  |
| N380  | -0.383119544 | 0.375453714   | 6.814569581  |
| N381  | -0.679113299 | 0.210619704   | 9.692118608  |
| N382  | 5.528717846  | -11.529785306 | 5.159735731  |
| N383  | 6.388216619  | -9.274402653  | 4.006444383  |
| N384  | 5.020791124  | -3.341639681  | 2.898689004  |
| N385  | 4.230146983  | -1.977630586  | 4.632516286  |
| N386  | 5.418992827  | -1.062279185  | 2.858367901  |
| N387  | 9.043758843  | -6.980815617  | 3.836179231  |
| N388  | -5.872878296 | -2.956515823  | -2.917147205 |
| N389  | -1.943526958 | -5.583579368  | -3.196357317 |
| N390  | -6.094133871 | -0.453360886  | -2.176444229 |
| N391  | -8.355834447 | 0.656925623   | -0.956408997 |
| N392  | -7.850908477 | 0.353186470   | 1.791920120  |
| N393  | -5.703408476 | 2.097401849   | 2.272242430  |
| N394  | -3.147818307 | 2.687859788   | -1.107253746 |



|      |              |               |               |
|------|--------------|---------------|---------------|
| N395 | -2.451868832 | 0.684192886   | -0.727972559  |
| N396 | -6.334537135 | 4.733194484   | 2.879282301   |
| N397 | -9.769140285 | 7.735061285   | 1.593207766   |
| N398 | -9.669209686 | 9.521724394   | 2.905320436   |
| N399 | 9.476587178  | 2.673090827   | 2.406074349   |
| N400 | 6.256477018  | 7.151409206   | -0.279693616  |
| N401 | 4.220268113  | 8.466130244   | -2.886023491  |
| N402 | 1.560668560  | 7.843668010   | -3.362793973  |
| N403 | -3.173648623 | 6.401346369   | -4.458900946  |
| N404 | -3.362335172 | 8.245171404   | -5.888592693  |
| N405 | -4.453737562 | 8.238707987   | -3.845393739  |
| N406 | 0.680289743  | 6.332213915   | -1.078426675  |
| N407 | 0.980791041  | 8.228885656   | 0.972202640   |
| N408 | -0.372969242 | 10.610117818  | 0.659947022   |
| N409 | -1.888140496 | 10.340242059  | -3.046983346  |
| N410 | -2.754861289 | 11.624265161  | 1.707781893   |
| N411 | 4.103935177  | -4.761069187  | -10.223116547 |
| N412 | 2.456087744  | -2.570011755  | -7.874727169  |
| N413 | 1.408151177  | 0.227217046   | -7.341780619  |
| N414 | 3.486967553  | 2.224887312   | -7.357878911  |
| N415 | -1.719171851 | -2.997683569  | -10.073407080 |
| N416 | -3.285524224 | -1.179209397  | -8.495054147  |
| N417 | 8.144958219  | -7.084648825  | -5.978236275  |
| N418 | 4.265465700  | -5.688224231  | -4.406445787  |
| N419 | 3.706480742  | -6.698977342  | -6.284977615  |
| N420 | 9.234901977  | -7.457630104  | -3.050657870  |
| N421 | 0.031893628  | 2.399915842   | -0.102668217  |
| N422 | 2.405733878  | -0.232602196  | 0.516363775   |
| N423 | 0.875760730  | 1.749984017   | -0.462899636  |
| N424 | 2.583433543  | -0.660825819  | 1.538929364   |
| O425 | -6.585593317 | -5.139086452  | 1.650058370   |
| O426 | -7.291601159 | -2.831561526  | 4.499574393   |
| O427 | -5.306823941 | -5.210151051  | 6.682309027   |
| O428 | -2.453579025 | -4.006329319  | 4.921656498   |
| O429 | -3.039875481 | -0.540928438  | 5.398721043   |
| O430 | -3.278656513 | -1.012638313  | 8.979646461   |
| O431 | -0.548852970 | -4.029365822  | 9.717868766   |
| O432 | 2.179043972  | -3.771788493  | 6.082923455   |
| O433 | 1.897576276  | 0.281440344   | 6.694148344   |
| O434 | 0.833873781  | 1.903718163   | 9.732195025   |
| O435 | 1.534126705  | -0.279255865  | 12.476608778  |
| O436 | 7.052949061  | -10.339915032 | 2.065131394   |
| O437 | 8.026319888  | -7.699599496  | 5.769404838   |
| O438 | 11.576880578 | -4.538783644  | 4.547772308   |
| O439 | -5.635863642 | -0.849505919  | 0.036179369   |
| O440 | -3.716057162 | -4.412594933  | -4.009514452  |
| O441 | -7.123072168 | 2.500177054   | -0.409159119  |
| O442 | -6.340225497 | 3.038537947   | -3.351652404  |
| O443 | -9.775020887 | 1.503550090   | 2.284000831   |
| O444 | -5.634965471 | 1.487102434   | 4.473152617   |
| O445 | -4.255217062 | 5.057044094   | 3.768513127   |
| O446 | -6.579711121 | 7.260714378   | 5.347360958   |
| O447 | 10.793029700 | -0.067881566  | 4.171687807   |
| O448 | 3.576322195  | 4.703953864   | 3.952157228   |
| O449 | 3.611313441  | 8.373224184   | -0.692091941  |
| O450 | 0.987769978  | 10.066268272  | -3.522860877  |
| O451 | -1.392147721 | 7.182849305   | -1.531613140  |
| O452 | -0.684698066 | 7.169341871   | 2.143896134   |
| O453 | 2.462320544  | 5.728586907   | 1.455464976   |
| O454 | 0.849122686  | 11.613026870  | 2.318039794   |
| O455 | -2.510441627 | 13.587001746  | 0.573766924   |
| O456 | -3.263939654 | 11.005036016  | -1.346934640  |
| O457 | -4.958684515 | 13.713897200  | 3.625554115   |
| O458 | -5.503293118 | 6.838499333   | -1.320925157  |
| O459 | 1.755231862  | -4.572689991  | -8.755093753  |
| O460 | -0.284071342 | -0.739890942  | -8.549280094  |
| O461 | 2.120953140  | 3.605205068   | -8.539771385  |
| O462 | 5.825640860  | 4.337418012   | -9.111290659  |
| O463 | -5.001456513 | -2.634350108  | -8.862586943  |
| O464 | -1.477843592 | -6.601674880  | -6.011566991  |
| O465 | 0.451881984  | -5.788358061  | -6.782824303  |
| O466 | -3.995865107 | 2.321235484   | -8.431627740  |
| O467 | 9.943443333  | -5.405607573  | -3.701721993  |
| O468 | 12.667022879 | -6.992120850  | -2.106449139  |
| O469 | 0.305522701  | -6.246057026  | -1.366154577  |
| O470 | -0.256947154 | -7.317074975  | 0.530841328   |
| O471 | 5.145737269  | -10.891433865 | -3.334864468  |
| O472 | 2.884883079  | -10.929548517 | -3.312834113  |
| O473 | 5.065060244  | -5.767078916  | -1.318523032  |
| O474 | 5.027073119  | -7.476051890  | 0.138656550   |

|      |              |               |              |
|------|--------------|---------------|--------------|
| O475 | 2.606843589  | -6.103304301  | -2.130576234 |
| O476 | 8.938889176  | -6.567588955  | 1.039669225  |
| O477 | 6.965650944  | -4.554879937  | 0.420205361  |
| O478 | -4.390903500 | 4.745764330   | -2.461078462 |
| O479 | 7.728886788  | -10.427124867 | -2.515401209 |
| O480 | 7.501325835  | -8.642223148  | -0.087140874 |
| S481 | 3.628515161  | 5.006451152   | -2.611444324 |
| S482 | 1.912644163  | 1.807785194   | -3.191298775 |
| S483 | 2.095708072  | -3.343611326  | -3.768177320 |
| S484 | 3.943566505  | 2.001906435   | -0.340829767 |
| S485 | 0.452381297  | -0.912393366  | -1.624327379 |
| S486 | 4.011560463  | -0.714135405  | -5.574356809 |
| S487 | 3.300030234  | -3.458478684  | -0.356631367 |
| S488 | 5.611124794  | 1.633266868   | -3.402423906 |
| S489 | 5.698071448  | -3.045928269  | -3.071051722 |
| S490 | 6.472332001  | -0.811740537  | -0.618060532 |
| end  |              |               |              |

## Fe2-N-N to Fe2-NH-N-b

Figure 8, scheme F

| reactant <b>Fe2-N-N</b> (S=3/2) | bm526hx7hnexp2n2n3.car_5 |              |               |              |
|---------------------------------|--------------------------|--------------|---------------|--------------|
| Fe( 139) -2.196                 | C1                       | -7.753334463 | -5.376553190  | 1.292458809  |
| Fe( 140) 0.085                  | C2                       | -8.125229943 | -6.525679002  | 0.348345007  |
| Fe( 141) -2.492                 | C3                       | -8.595942619 | -3.460010635  | 2.578410123  |
| Fe( 142) 2.372                  | C4                       | -7.955451368 | -3.720959898  | 3.938722564  |
| Fe( 143) 3.016                  | C5                       | -7.523618210 | -5.315786186  | 5.743338389  |
| Fe( 144) 1.130                  | C6                       | -5.998054864 | -5.430262107  | 5.673780709  |
| Fe( 145) 0.974                  | C7                       | -4.024189836 | -5.743606093  | 4.275382903  |
|                                 | C8                       | -3.485390852 | -4.310942880  | 4.304179184  |
|                                 | C9                       | -3.896208327 | -1.980824957  | 3.649343662  |
|                                 | C10                      | -3.903800850 | -1.362818760  | 5.056063430  |
|                                 | C11                      | -4.936962892 | -1.201078089  | 7.231236221  |
|                                 | C12                      | -3.868899387 | -1.761762222  | 8.181778252  |
|                                 | C13                      | -2.870709485 | -3.784258099  | 9.146946894  |
|                                 | C14                      | -1.400828053 | -4.085898503  | 8.822827576  |
|                                 | C15                      | 0.242999420  | -4.777484238  | 7.122974283  |
|                                 | C16                      | 0.983498463  | -3.642371509  | 6.408536505  |
|                                 | C17                      | 0.676577749  | -1.375719404  | 5.431855462  |
|                                 | C18                      | 0.785530503  | -0.162102468  | 6.368865672  |
|                                 | C19                      | -0.200584409 | -1.153185141  | 4.173738396  |
|                                 | C20                      | 0.039614640  | 0.209595855   | 3.513655657  |
|                                 | C21                      | -0.020019454 | -2.305140082  | 3.175750060  |
|                                 | C22                      | -0.376751770 | 1.575564541   | 7.653077660  |
|                                 | C23                      | -0.019656344 | 1.246247045   | 9.113518525  |
|                                 | C24                      | -1.708697973 | 2.349324980   | 7.507992519  |
|                                 | C25                      | -1.783323726 | 3.517956752   | 8.496148598  |
|                                 | C26                      | -1.882254687 | 2.856345056   | 6.069576807  |
|                                 | C27                      | -0.427987795 | -0.097206053  | 11.087482613 |
|                                 | C28                      | 1.036003328  | -0.375812002  | 11.365603074 |
|                                 | C29                      | 5.898163267  | -11.620369470 | 3.740698776  |
|                                 | C30                      | 6.515414155  | -10.338750611 | 3.191336279  |
|                                 | C31                      | 6.793965725  | -7.916339326  | 3.690074311  |
|                                 | C32                      | 8.018432496  | -7.525427492  | 4.537762459  |
|                                 | C33                      | 5.616286649  | -6.958354382  | 3.932601032  |
|                                 | C34                      | 5.945500639  | -5.517033306  | 3.552824392  |
|                                 | C35                      | 4.695522645  | -4.641963974  | 3.489177730  |
|                                 | C36                      | 4.875099437  | -2.139052262  | 3.462149518  |
|                                 | C37                      | 10.273872991 | -6.565775138  | 4.480485070  |
|                                 | C38                      | 10.479045309 | -5.067787063  | 4.471778732  |
|                                 | C39                      | -5.351519837 | -2.684143097  | -1.572730022 |
|                                 | C40                      | -5.712342103 | -1.249147042  | -1.142114405 |
|                                 | C41                      | -3.813461343 | -2.826775565  | -1.506066256 |
|                                 | C42                      | -3.255049773 | -4.259863648  | -1.623015770 |
|                                 | C43                      | -2.986687783 | -4.748167617  | -3.047269462 |
|                                 | C44                      | -6.185823925 | 0.991102855   | -2.051015235 |
|                                 | C45                      | -7.270565674 | 1.455551801   | -1.068661686 |
|                                 | C46                      | -6.359017368 | 1.600471463   | -3.447998673 |
|                                 | C47                      | -9.425333691 | 0.947507845   | -0.016633471 |
|                                 | C48                      | -9.025187033 | 0.960464213   | 1.461838525  |
|                                 | C49                      | -7.321552051 | 0.429570820   | 3.140325050  |
|                                 | C50                      | -6.147085339 | 1.385598179   | 3.354710684  |
|                                 | C51                      | -4.616080483 | 3.054339177   | 2.432072948  |
|                                 | C52                      | -5.052877383 | 4.364230356   | 3.130348760  |
|                                 | C53                      | -4.029303189 | 3.489102285   | 1.080694380  |
|                                 | C54                      | -3.413450074 | 2.428344310   | 0.231323303  |
|                                 | C55                      | -2.966032846 | 1.152635940   | 0.466625983  |

|      |               |              |              |
|------|---------------|--------------|--------------|
| C56  | -2.557532600  | 1.626623577  | -1.672341535 |
| C57  | -6.859046833  | 6.039040308  | 3.259392898  |
| C58  | -6.757279204  | 6.199515632  | 4.774996941  |
| C59  | -8.334814769  | 6.095612681  | 2.800173713  |
| C60  | -8.950325111  | 7.458664519  | 2.676674057  |
| C61  | -8.880210147  | 8.562740725  | 3.503916168  |
| C62  | -10.186005420 | 8.984305828  | 1.764120900  |
| C63  | 9.244021151   | 1.639612762  | 3.417883316  |
| C64  | 10.282778463  | 0.546431298  | 3.246365661  |
| C65  | 7.853007221   | 0.985760972  | 3.236290870  |
| C66  | 6.717097069   | 1.957602628  | 3.452991517  |
| C67  | 6.135132153   | 2.139738873  | 4.719944334  |
| C68  | 6.217001801   | 2.723289853  | 2.384258056  |
| C69  | 5.088291851   | 3.048651023  | 4.916857035  |
| C70  | 5.189464121   | 3.648093794  | 2.568631832  |
| C71  | 4.618439669   | 3.803061905  | 3.833812316  |
| C72  | 5.376192798   | 6.852728344  | -1.420007155 |
| C73  | 4.323654021   | 7.957763777  | -1.622925338 |
| C74  | 4.695911581   | 5.508409590  | -1.181267558 |
| C75  | 3.310174506   | 9.547597194  | -3.218214312 |
| C76  | 1.836206434   | 9.164691548  | -3.379527777 |
| C77  | 0.219231864   | 7.267356336  | -3.340837102 |
| C78  | -0.235865611  | 6.923381891  | -1.898974604 |
| C79  | 0.245018067   | 6.020723720  | -4.254174797 |
| C80  | -1.009372815  | 5.144469444  | -4.355986531 |
| C81  | -2.155331951  | 5.681162155  | -5.230435458 |
| C82  | -3.678022898  | 7.599742724  | -4.750219157 |
| C83  | 0.306729275   | 5.973856018  | 0.292105455  |
| C84  | 0.132395614   | 7.189819921  | 1.214218858  |
| C85  | 1.323455729   | 5.022573981  | 0.958548570  |
| C86  | 1.194785707   | 9.259190210  | 1.971450841  |
| C87  | 0.550167673   | 10.603594577 | 1.668988212  |
| C88  | -0.855444227  | 11.875346402 | 0.137097861  |
| C89  | -2.131672021  | 12.431720430 | 0.813292034  |
| C90  | -1.005485147  | 11.881687455 | -1.386496921 |
| C91  | -2.155275636  | 11.024342223 | -1.900565546 |
| C92  | -4.076651541  | 11.954674596 | 2.226391649  |
| C93  | -3.992201009  | 13.057583146 | 3.273421765  |
| C94  | -4.734875440  | 10.687174155 | 2.839267770  |
| C95  | -4.973412167  | 9.613002106  | 1.802700411  |
| C96  | -6.149173545  | 9.615052795  | 1.037073787  |
| C97  | -4.011401409  | 8.625752147  | 1.534978365  |
| C98  | -6.351750019  | 8.678479831  | 0.022157114  |
| C99  | -4.185186154  | 7.695061088  | 0.505726412  |
| C100 | -5.355994448  | 7.738581266  | -0.245292913 |
| C101 | 4.087128982   | -3.987415027 | -8.979330431 |
| C102 | 2.658089099   | -3.728786972 | -8.535916302 |
| C103 | 1.193443688   | -2.185520203 | -7.257039987 |
| C104 | 0.693381897   | -0.832980745 | -7.777430939 |
| C105 | 1.111236937   | 1.591656515  | -7.739374332 |
| C106 | 2.294876834   | 2.539688022  | -7.924396084 |
| C107 | 4.578102591   | 3.185278581  | -7.397075251 |
| C108 | 5.144547084   | 3.378070879  | -8.790335060 |
| C109 | -2.753932726  | -3.495790659 | -9.158958039 |
| C110 | -3.781058529  | -2.404023355 | -8.834981326 |
| C111 | -2.265285388  | -4.166269980 | -7.855266180 |
| C112 | -1.540395329  | -5.491651384 | -8.151956610 |
| C113 | -0.869733605  | -6.022409899 | -6.905479776 |
| C114 | -4.183884809  | -0.085862283 | -8.173994000 |
| C115 | -3.709112408  | 1.198430270  | -8.824083406 |
| C116 | -4.548726358  | 0.045032004  | -6.674011580 |
| C117 | -3.312131757  | 0.050915209  | -5.818951400 |
| C118 | -2.579080856  | 1.233914381  | -5.617732756 |
| C119 | -2.790052822  | -1.161393854 | -5.338975364 |
| C120 | -1.314346264  | 1.183689873  | -5.021757333 |
| C121 | -1.526212078  | -1.210950775 | -4.742953418 |
| C122 | -0.773085383  | -0.039948130 | -4.616062836 |
| C123 | 7.933076459   | -6.251630768 | -4.780776220 |
| C124 | 9.108196366   | -6.326260746 | -3.795278893 |
| C125 | 6.616294133   | -6.593143963 | -4.068561391 |
| C126 | 5.367176552   | -6.407342884 | -4.865550035 |
| C127 | 5.021338154   | -7.031841584 | -6.046456862 |
| C128 | 3.279484014   | -5.901425723 | -5.278846555 |
| C129 | 10.311030957  | -7.536858300 | -2.080632058 |
| C130 | 11.665357864  | -7.326663021 | -2.722268454 |
| C131 | 0.607511040   | -6.869289326 | -0.222609292 |
| C132 | 2.097526828   | -6.915470353 | 0.102179236  |
| C133 | 3.021657454   | -7.056168327 | -1.145826411 |
| C134 | 2.946395058   | -8.508913032 | -1.684161515 |
| C135 | 3.978598562   | -8.858795262 | -2.757928579 |

|       |              |               |              |
|-------|--------------|---------------|--------------|
| C136  | 3.996810607  | -10.350075860 | -3.157358522 |
| C137  | 4.471341343  | -6.765144493  | -0.722247345 |
| C138  | 3.569038087  | -0.703968772  | -2.211600932 |
| Fe139 | 3.867273713  | -1.966210118  | -3.750113721 |
| Fe140 | 2.156878635  | 0.609688601   | -1.121282523 |
| Fe141 | 5.013622507  | 0.488107069   | -1.579815092 |
| Fe142 | 3.687394002  | 0.534237550   | -3.764636735 |
| Fe143 | 3.876864308  | 2.746797996   | -2.435817017 |
| Fe144 | 4.686733098  | -2.060708131  | -1.317091712 |
| Fe145 | 2.181576788  | -2.323680967  | -1.836797881 |
| H146  | -6.345294810 | -7.524178902  | 0.364016934  |
| H147  | -6.520917465 | -6.530307085  | -0.918593332 |
| H148  | -9.732197121 | -4.816055454  | 1.382221624  |
| H149  | -8.839419569 | -6.148053044  | -0.401310284 |
| H150  | -8.680638855 | -7.264382516  | 0.951818526  |
| H151  | -7.946997555 | -2.737634520  | 2.061612893  |
| H152  | -8.709352963 | -5.624797949  | 3.974835156  |
| H153  | -9.569608710 | -2.979389226  | 2.742641499  |
| H154  | -7.938400279 | -6.278828535  | 6.068659683  |
| H155  | -6.063667252 | -5.859648786  | 3.655268541  |
| H156  | -7.745931939 | -4.569953924  | 6.517556242  |
| H157  | -2.896184138 | -1.807430576  | 3.231066098  |
| H158  | -5.042203349 | -3.705044191  | 3.100682002  |
| H159  | -3.794078421 | -6.206639676  | 3.306326609  |
| H160  | -4.788408353 | -0.113991324  | 7.190871126  |
| H161  | -5.677365014 | -2.308750851  | 5.531970491  |
| H162  | -3.508306236 | -6.306455569  | 5.062170519  |
| H163  | -4.625917248 | -1.457997850  | 3.015026746  |
| H164  | -4.245276191 | -3.674042030  | 7.509797532  |
| H165  | -5.927161829 | -1.405458639  | 7.662312560  |
| H166  | -0.308043680 | -3.269785048  | 3.617153943  |
| H167  | -0.659300292 | -2.146619015  | 2.291922129  |
| H168  | 1.018543369  | -2.373496015  | 2.820129941  |
| H169  | -1.243424277 | -1.161926990  | 4.518703645  |
| H170  | -3.359864962 | -4.740702093  | 9.384039424  |
| H171  | -1.888273575 | 2.038059578   | 5.337368339  |
| H172  | -1.462344442 | -0.254089808  | 9.225901206  |
| H173  | -1.748517386 | 3.185388657   | 9.543390853  |
| H174  | 0.993369849  | 0.235055980   | 2.972892136  |
| H175  | 0.034686366  | 1.035735623   | 4.236973130  |
| H176  | 9.316738617  | 1.999749068   | 4.461992634  |
| H177  | -2.835315732 | 3.395013125   | 5.966815716  |
| H178  | -2.723514522 | 4.068523075   | 8.346020181  |
| H179  | -1.068575386 | 3.553392310   | 5.808914042  |
| H180  | -0.948808748 | 4.218796099   | 8.334755206  |
| H181  | -2.531470550 | 1.647281622   | 7.735199905  |
| H182  | 0.449119983  | 2.217569264   | 7.310870542  |
| H183  | -1.274991844 | 0.047866775   | 6.435574140  |
| H184  | -0.765267873 | 0.413359185   | 2.791307792  |
| H185  | 1.641131300  | 4.270383192   | 0.220913346  |
| H186  | 0.795726118  | 4.508905241   | 1.775320413  |
| H187  | 2.707043020  | 5.348196144   | 2.324000694  |
| H188  | 3.226993763  | 4.685653121   | 4.862073421  |
| H189  | 4.804577681  | 4.225069289   | 1.727134943  |
| H190  | 6.621055915  | 2.574403992   | 1.380342155  |
| H191  | 6.496382889  | 1.555011721   | 5.570837392  |
| H192  | -0.757892516 | -2.610675852  | 6.404706609  |
| H193  | 0.230214586  | -5.641653418  | 6.443531632  |
| H194  | 0.830309101  | -5.052566080  | 8.008202553  |
| H195  | -1.850337561 | -4.501322825  | 6.829291604  |
| H196  | -2.860563860 | -3.167559580  | 10.053763648 |
| H197  | 4.635345837  | 3.164609625   | 5.905614626  |
| H198  | 1.707789515  | -1.578582827  | 5.120937781  |
| H199  | -0.767984198 | 0.703898322   | 11.763652154 |
| H200  | -0.985850105 | -1.012547528  | 11.338376706 |
| H201  | 1.627510628  | -0.733647995  | 10.490860724 |
| H202  | 11.150304913 | -7.053092927  | 4.026240163  |
| H203  | -1.748972024 | -5.968358807  | -4.127262372 |
| H204  | 1.274472598  | -6.043965480  | -1.845423563 |
| H205  | -2.275872838 | -6.237398585  | -8.487309071 |
| H206  | -0.801701373 | -5.349439388  | -8.953721221 |
| H207  | -3.117118056 | -4.366316068  | -7.186794737 |
| H208  | -3.101532881 | 1.046584406   | -9.747326851 |
| H209  | -3.342623066 | -4.244205015  | -9.711851329 |
| H210  | -3.368947652 | -2.193135713  | -2.292244501 |
| H211  | -3.953422862 | -4.978829318  | -1.161154979 |
| H212  | -2.272884872 | -1.028983018  | -8.443574227 |
| H213  | -5.126242323 | -0.322186137  | -8.710483264 |
| H214  | -1.036468431 | -2.406977907  | -9.583991222 |
| H215  | -1.300893544 | -5.818207275  | -2.431351831 |

|      |               |              |               |
|------|---------------|--------------|---------------|
| H216 | -1.604243694  | -3.467222670 | -7.319699068  |
| H217 | -1.202749014  | -3.783452557 | -10.473648502 |
| H218 | -6.758442632  | -3.464182271 | -2.868483988  |
| H219 | -3.494793769  | -2.420786696 | -0.534295606  |
| H220 | 0.827666911   | -5.303241876 | -7.581221630  |
| H221 | -2.326631160  | -4.331555892 | -1.038220102  |
| H222 | -3.844563349  | 2.609881532  | 3.076509623   |
| H223 | -2.985203976  | 0.542588980  | 1.361020171   |
| H224 | -8.133483027  | 0.769141417  | 3.798070515   |
| H225 | -7.265963248  | -0.074878439 | 1.066399095   |
| H226 | -6.946136213  | 4.080547370  | 2.394809025   |
| H227 | -8.343329544  | 8.750220676  | 4.426451877   |
| H228 | -6.906087521  | 5.245337892  | 5.337659356   |
| H229 | -8.940974948  | 5.447929966  | 3.458291206   |
| H230 | -6.276120451  | 6.840198119  | 2.778557399   |
| H231 | -10.850759784 | 9.535842514  | 1.105170156   |
| H232 | -3.265570213  | 4.254146572  | 1.294026958   |
| H233 | -4.820549854  | 3.983157599  | 0.494485763   |
| H234 | -9.831620415  | 10.461869956 | 3.256490709   |
| H235 | -8.381565362  | 5.644542197  | 1.796263060   |
| H236 | -6.188971871  | 2.032181764  | 1.372780092   |
| H237 | -7.017134916  | -0.564137311 | 3.500882325   |
| H238 | -9.861500650  | 1.935231010  | -0.222321667  |
| H239 | -2.219527515  | 1.530421220  | -2.701648101  |
| H240 | -10.216310197 | 0.198786126  | -0.154166044  |
| H241 | 10.294596204  | 3.228625851  | 2.667924547   |
| H242 | 8.686023367   | 3.323293603  | 2.396813447   |
| H243 | 1.571581270   | 5.980983861  | -1.458631136  |
| H244 | -0.670476207  | 5.469512229  | 0.268115044   |
| H245 | 1.745366638   | 8.077015339  | 0.307821293   |
| H246 | -3.475058425  | 3.550584825  | -1.616867281  |
| H247 | -5.124528281  | 4.161992314  | -2.796291555  |
| H248 | -6.709281899  | 3.384943407  | -4.183684480  |
| H249 | -4.806331354  | 5.409890885  | -1.856122074  |
| H250 | -5.531587467  | 1.244011128  | -4.083482843  |
| H251 | -7.312737118  | 1.269460146  | -3.886863539  |
| H252 | -0.051363214  | 11.600430595 | -1.853763219  |
| H253 | -1.226370059  | 12.919000315 | -1.683103023  |
| H254 | -0.912738664  | 10.190368572 | -3.334639272  |
| H255 | -2.594713400  | 9.659847183  | -3.319517517  |
| H256 | -3.722876839  | 9.179098557  | -6.056723852  |
| H257 | -2.652189883  | 4.848663271  | -5.751446709  |
| H258 | -7.277927712  | 8.684929148  | -0.558521227  |
| H259 | -3.101155936  | 8.560221407  | 2.136402556   |
| H260 | -4.685856774  | 7.778312675  | -2.961913350  |
| H261 | 1.066004774   | 5.376300174  | -3.901050887  |
| H262 | 2.349495050   | 7.193954817  | -3.262464616  |
| H263 | -1.391869203  | 4.882784129  | -3.357033253  |
| H264 | -8.372608632  | -0.211968621 | -1.486110384  |
| H265 | 3.641188457   | 10.015001265 | -4.155264325  |
| H266 | -6.105558201  | -0.963712103 | -3.075983803  |
| H267 | 0.534191829   | 6.357849076  | -5.263060229  |
| H268 | -3.396443918  | 6.977609695  | 0.275702136   |
| H269 | 3.340340219   | 10.313936474 | -2.430183215  |
| H270 | -2.997422086  | 7.741457654  | -6.689270274  |
| H271 | -5.110446524  | 8.942161082  | -4.172660768  |
| H272 | -5.188954117  | -3.534134190 | -3.441129985  |
| H273 | -5.784298735  | -3.344287835 | -0.797923034  |
| H274 | -6.926493346  | 10.356399497 | 1.236387291   |
| H275 | -5.253697667  | 1.376069452  | -1.613420568  |
| H276 | -0.485211041  | 8.020489497  | -3.706944025  |
| H277 | -1.741390251  | 6.341671278  | -6.002688509  |
| H278 | -0.680347034  | 4.200558105  | -4.812476607  |
| H279 | -3.600306196  | 5.872686984  | -3.677149500  |
| H280 | 0.799326725   | 8.912991126  | 2.938036930   |
| H281 | -0.461969164  | 9.758581923  | 0.106115184   |
| H282 | -0.087461885  | 12.622466711 | 0.390163209   |
| H283 | 2.271625136   | 9.440243134  | 2.087229610   |
| H284 | -2.444775163  | 10.656327069 | 1.742018270   |
| H285 | 4.610523824   | -3.032368632 | -9.132927093  |
| H286 | 4.579479083   | -4.489489377 | -8.119603622  |
| H287 | 7.902223956   | -5.202333449 | -5.109781800  |
| H288 | 5.052324897   | -5.108951015 | -10.381215222 |
| H289 | 3.511240750   | -5.587175986 | -10.100662285 |
| H290 | 5.478591914   | 4.754930596  | -1.029758369  |
| H291 | 5.671899822   | 7.384637089  | 0.529659226   |
| H292 | 4.825626112   | 8.094132825  | -3.613182643  |
| H293 | 4.070612241   | 5.560860596  | -0.278846991  |
| H294 | 6.802471546   | 7.993258855  | -0.483462611  |
| H295 | 5.392035177   | 2.802109872  | -6.761740636  |

|       |              |               |              |
|-------|--------------|---------------|--------------|
| H296  | 6.005887846  | 6.779397627   | -2.320352958 |
| H297  | 5.310942828  | -7.023288724  | 4.990020222  |
| H298  | 7.057949762  | -7.899403639  | 2.624744912  |
| H299  | 3.620677991  | 1.372566950   | -6.804727597 |
| H300  | 5.119178422  | -0.132886657  | 3.138217801  |
| H301  | 0.560799966  | 1.561166207   | -8.687459892 |
| H302  | -1.117973556 | -2.163284339  | -4.396871925 |
| H303  | 0.447929409  | 2.072114765   | -6.999375037 |
| H304  | 4.261924778  | -4.503690576  | 4.486799977  |
| H305  | 2.109576037  | 0.037243110   | -6.604947908 |
| H306  | 3.925132466  | -5.120744410  | 2.863857830  |
| H307  | 4.776077354  | -7.320504931  | 3.318691158  |
| H308  | 6.424538679  | -5.501207893  | 2.563067650  |
| H309  | 6.659080662  | -5.073272145  | 4.264835694  |
| H310  | -5.197473962 | -0.803563459  | -6.412775367 |
| H311  | 5.934881541  | -9.480709970  | 4.902712120  |
| H312  | 4.992921743  | -11.799524979 | 3.140907684  |
| H313  | 0.229642140  | -0.061608111  | -4.192301304 |
| H314  | 6.307634263  | -11.836398983 | 5.746959999  |
| H315  | 4.749126054  | -12.157582786 | 5.361410187  |
| H316  | 5.524825268  | -3.388577048  | 2.008252885  |
| H317  | -0.728232463 | 2.093300866   | -4.878559242 |
| H318  | -3.365463146 | -2.082760935  | -5.451628386 |
| H319  | 7.639022040  | -9.937140098  | -1.667826192 |
| H320  | 6.646372906  | -7.648277163  | -3.746250047 |
| H321  | 6.626094160  | -8.171612840  | -0.108211575 |
| H322  | 6.776583054  | -10.534174634 | -2.815449363 |
| H323  | 4.924220439  | 2.549721342   | -9.505969518 |
| H324  | 6.341822783  | -5.025170285  | -0.193456297 |
| H325  | 2.286004987  | -7.726579298  | 0.815874184  |
| H326  | 3.271797054  | -2.012080962  | -7.605993647 |
| H327  | 3.088055512  | -9.176782567  | -0.820072670 |
| H328  | 3.128750700  | -7.039962028  | -7.048716076 |
| H329  | 2.266120166  | -5.529557833  | -5.206044256 |
| H330  | 6.600095479  | -12.438604695 | 3.504814795  |
| H331  | 5.809110950  | -1.129128362  | 1.910450295  |
| H332  | 8.344759354  | -5.810264187  | 0.815451483  |
| H333  | 7.249913413  | -3.773698126  | -0.092039162 |
| H334  | 8.970885944  | -6.868687008  | 2.800462234  |
| H335  | 3.656705610  | -2.707374622  | 5.066610921  |
| H336  | 3.768505412  | -8.275915560  | -3.667562405 |
| H337  | 4.988105008  | -8.580557800  | -2.425994395 |
| H338  | 1.930344185  | -8.688404743  | -2.068783052 |
| H339  | 1.323061079  | -2.151302396  | -6.163436753 |
| H340  | -2.988166131 | 2.183949457   | -5.970150154 |
| H341  | -5.129210104 | 0.973128952   | -6.561731794 |
| H342  | 2.322371648  | -5.963992968  | 0.612670644  |
| H343  | 8.500949767  | -7.342484704  | 0.588993220  |
| H344  | 7.390248346  | -9.260827863  | 0.679231446  |
| H345  | 4.169113312  | -1.052138459  | 5.046022088  |
| H346  | 5.588485444  | -7.684323377  | -6.697744831 |
| H347  | 6.541873879  | -5.999248530  | -3.149948313 |
| H348  | 0.450123154  | -2.944758897  | -7.507250030 |
| H349  | 4.270250307  | 4.161908136   | -6.993612298 |
| H350  | 7.776694010  | 0.150701103   | 3.948013698  |
| H351  | 7.800599655  | 0.566143792   | 2.218971933  |
| H352  | 9.013991668  | -6.795598932  | -6.436305296 |
| H353  | 8.280101102  | -8.063075753  | -5.704789920 |
| H354  | 10.304487395 | -8.550911992  | -1.651558334 |
| H355  | 8.569956181  | -8.234497368  | -3.096563168 |
| H356  | 11.703721124 | -7.564553193  | -3.813123729 |
| H357  | 10.178737050 | -6.827306046  | -1.248411373 |
| H358  | 10.547306869 | 0.327160687   | 2.183316092  |
| H359  | -2.983326383 | 13.208207926  | 3.724636376  |
| H360  | 10.220879258 | -6.878390634  | 5.538329978  |
| H361  | 9.544407953  | -4.459287892  | 4.408886428  |
| H362  | -4.712814163 | 12.325745278  | 1.405598117  |
| H363  | -4.095751334 | 10.307574635  | 3.651951734  |
| H364  | -5.686309473 | 11.002321345  | 3.291484848  |
| H365  | 1.133612615  | -3.281388603  | -1.314466790 |
| H366  | 4.580773287  | -1.705084195  | 0.133331047  |
| H367  | -6.448413665 | 6.813722734   | -1.566787445 |
| H368  | 0.079295498  | -1.300323542  | -0.369814444 |
| H369  | -1.955105760 | -0.197591359  | -0.878648218 |
| Mo370 | 3.821772714  | -4.368785909  | -2.487473343 |
| N371  | -7.025338379 | -7.192083458  | -0.324037738 |
| N372  | -8.805223356 | -4.648389203  | 1.766361251  |
| N373  | -8.150103983 | -4.944927359  | 4.484384109  |
| N374  | -5.465642985 | -5.792192389  | 4.480397500  |
| N375  | -4.224676873 | -3.397059411  | 3.623876810  |

|      |              |               |               |
|------|--------------|---------------|---------------|
| N376 | -4.890508394 | -1.762271322  | 5.892023951   |
| N377 | -3.662479823 | -3.104608117  | 8.129783361   |
| N378 | -1.114244118 | -4.461349357  | 7.540885648   |
| N379 | 0.230196073  | -2.547226650  | 6.166695808   |
| N380 | -0.383119544 | 0.375453714   | 6.814569581   |
| N381 | -0.679113299 | 0.210619704   | 9.692118608   |
| N382 | 5.528717846  | -11.529785306 | 5.159735731   |
| N383 | 6.388216619  | -9.274402653  | 4.006444383   |
| N384 | 5.020791124  | -3.341639681  | 2.898689004   |
| N385 | 4.230146983  | -1.977630586  | 4.632516286   |
| N386 | 5.418992827  | -1.062279185  | 2.858367901   |
| N387 | 9.043758843  | -6.980815617  | 3.836179231   |
| N388 | -5.872878296 | -2.956515823  | -2.917147205  |
| N389 | -1.943526958 | -5.583579368  | -3.196357317  |
| N390 | -6.094133871 | -0.453360886  | -2.176444229  |
| N391 | -8.355834447 | 0.656925623   | -0.956408997  |
| N392 | -7.850908477 | 0.353186470   | 1.791920120   |
| N393 | -5.703408476 | 2.097401849   | 2.272242430   |
| N394 | -3.147818307 | 2.687859788   | -1.107253746  |
| N395 | -2.451868832 | 0.684192886   | -0.727972559  |
| N396 | -6.334537135 | 4.733194484   | 2.879282301   |
| N397 | -9.769140285 | 7.735061285   | 1.593207766   |
| N398 | -9.669209686 | 9.521724394   | 2.905320436   |
| N399 | 9.476587178  | 2.673090827   | 2.406074349   |
| N400 | 6.256477018  | 7.151409206   | -0.279693616  |
| N401 | 4.220268113  | 8.466130244   | -2.886023491  |
| N402 | 1.560668560  | 7.843668010   | -3.362793973  |
| N403 | -3.173648623 | 6.401346369   | -4.458900946  |
| N404 | -3.362335172 | 8.245171404   | -5.888592693  |
| N405 | -4.453737562 | 8.238707987   | -3.845393739  |
| N406 | 0.680289743  | 6.332213915   | -1.078426675  |
| N407 | 0.980791041  | 8.228885656   | 0.972202640   |
| N408 | -0.372969242 | 10.610117818  | 0.659947022   |
| N409 | -1.888140496 | 10.340242059  | -3.046983346  |
| N410 | -2.754861289 | 11.624265161  | 1.707781893   |
| N411 | 4.103935177  | -4.761069187  | -10.223116547 |
| N412 | 2.456087744  | -2.570011755  | -7.874727169  |
| N413 | 1.408151177  | 0.227217046   | -7.341780619  |
| N414 | 3.486967553  | 2.224887312   | -7.357878911  |
| N415 | -1.719171851 | -2.997683569  | -10.073407080 |
| N416 | -3.285524224 | -1.179209397  | -8.495054147  |
| N417 | 8.144958219  | -7.084648825  | -5.978236275  |
| N418 | 4.265465700  | -5.688224231  | -4.406445787  |
| N419 | 3.706480742  | -6.698977342  | -6.284977615  |
| N420 | 9.234901977  | -7.457630104  | -3.050657870  |
| N421 | 0.031893628  | 2.399915842   | -0.102668217  |
| N422 | 2.405733878  | -0.232602196  | 0.516363775   |
| N423 | 0.875760730  | 1.749984017   | -0.462899636  |
| N424 | 2.583433543  | -0.660825819  | 1.538929364   |
| O425 | -6.585593317 | -5.139086452  | 1.650058370   |
| O426 | -7.291601159 | -2.831561526  | 4.499574393   |
| O427 | -5.306823941 | -5.210151051  | 6.682309027   |
| O428 | -2.453579025 | -4.006329319  | 4.921656498   |
| O429 | -3.039875481 | -0.540928438  | 5.398721043   |
| O430 | -3.278656513 | -1.012638313  | 8.979646461   |
| O431 | -0.548852970 | -4.029365822  | 9.717868766   |
| O432 | 2.179043972  | -3.771788493  | 6.082923455   |
| O433 | 1.897576276  | 0.281440344   | 6.694148344   |
| O434 | 0.833873781  | 1.903718163   | 9.732195025   |
| O435 | 1.534126705  | -0.279255865  | 12.476608778  |
| O436 | 7.052949061  | -10.339915032 | 2.065131394   |
| O437 | 8.026319888  | -7.699599496  | 5.769404838   |
| O438 | 11.576880578 | -4.538783644  | 4.547772308   |
| O439 | -5.635863642 | -0.849505919  | 0.036179369   |
| O440 | -3.716057162 | -4.412594933  | -4.009514452  |
| O441 | -7.123072168 | 2.500177054   | -0.409159119  |
| O442 | -6.340225497 | 3.038537947   | -3.351652404  |
| O443 | -9.775020887 | 1.503550090   | 2.284000831   |
| O444 | -5.634965471 | 1.487102434   | 4.473152617   |
| O445 | -4.255217062 | 5.057044094   | 3.768513127   |
| O446 | -6.579711121 | 7.260714378   | 5.347360958   |
| O447 | 10.793029700 | -0.067881566  | 4.171687807   |
| O448 | 3.576322195  | 4.703953864   | 3.952157228   |
| O449 | 3.611313441  | 8.373224184   | -0.692091941  |
| O450 | 0.987769978  | 10.066268272  | -3.522860877  |
| O451 | -1.392147721 | 7.182849305   | -1.531613140  |
| O452 | -0.684698066 | 7.169341871   | 2.143896134   |
| O453 | 2.462320544  | 5.728586907   | 1.455464976   |
| O454 | 0.849122686  | 11.613026870  | 2.318039794   |
| O455 | -2.510441627 | 13.587001746  | 0.573766924   |





|      |               |              |              |
|------|---------------|--------------|--------------|
| C44  | -6.179813619  | 0.996327414  | -2.040154706 |
| C45  | -7.268187259  | 1.454719235  | -1.058776314 |
| C46  | -6.355961194  | 1.605231188  | -3.436877499 |
| C47  | -9.422744893  | 0.936547682  | -0.010953354 |
| C48  | -9.025315222  | 0.953539045  | 1.468248460  |
| C49  | -7.321551227  | 0.435318081  | 3.150467496  |
| C50  | -6.151770570  | 1.397694656  | 3.363945579  |
| C51  | -4.604918768  | 3.046659838  | 2.433233670  |
| C52  | -5.045441400  | 4.356288076  | 3.129262461  |
| C53  | -4.018981899  | 3.480530631  | 1.081061416  |
| C54  | -3.397470998  | 2.419649040  | 0.236038315  |
| C55  | -2.957855290  | 1.142358483  | 0.474722018  |
| C56  | -2.529412672  | 1.613809745  | -1.661016078 |
| C57  | -6.848703224  | 6.034304529  | 3.244765307  |
| C58  | -6.751441040  | 6.191808602  | 4.761025938  |
| C59  | -8.323149354  | 6.090503049  | 2.781562605  |
| C60  | -8.943192736  | 7.452178079  | 2.664348289  |
| C61  | -8.871348850  | 8.555505247  | 3.492433936  |
| C62  | -10.190829004 | 8.974221900  | 1.762178074  |
| C63  | 9.238193158   | 1.631171901  | 3.421060544  |
| C64  | 10.274716957  | 0.534993168  | 3.252914711  |
| C65  | 7.845873186   | 0.982375147  | 3.242526220  |
| C66  | 6.712985933   | 1.958291990  | 3.457980473  |
| C67  | 6.137788293   | 2.149826418  | 4.726653435  |
| C68  | 6.204472242   | 2.712972640  | 2.385530019  |
| C69  | 5.088264243   | 3.056117284  | 4.921477234  |
| C70  | 5.173334340   | 3.634350099  | 2.567414873  |
| C71  | 4.607792525   | 3.797517457  | 3.834275525  |
| C72  | 5.377189916   | 6.858831402  | -1.391168802 |
| C73  | 4.313966899   | 7.950023445  | -1.605205896 |
| C74  | 4.714650158   | 5.516379903  | -1.084448855 |
| C75  | 3.313544151   | 9.539301385  | -3.208959514 |
| C76  | 1.837452645   | 9.166168358  | -3.370725203 |
| C77  | 0.214215495   | 7.272395990  | -3.333145368 |
| C78  | -0.249435241  | 6.930572353  | -1.893649325 |
| C79  | 0.243541231   | 6.025891895  | -4.245836135 |
| C80  | -1.010054833  | 5.149212574  | -4.351230909 |
| C81  | -2.154918612  | 5.685580024  | -5.227112627 |
| C82  | -3.677500724  | 7.604901014  | -4.746689379 |
| C83  | 0.275536971   | 5.980767868  | 0.301061473  |
| C84  | 0.118443069   | 7.198412464  | 1.223471895  |
| C85  | 1.276079058   | 5.013150784  | 0.966135033  |
| C86  | 1.197777140   | 9.263440456  | 1.969498928  |
| C87  | 0.555454450   | 10.607781408 | 1.662244854  |
| C88  | -0.853262391  | 11.876317630 | 0.131875371  |
| C89  | -2.128275475  | 12.430995142 | 0.812594395  |
| C90  | -1.010384267  | 11.884927915 | -1.390935806 |
| C91  | -2.156406388  | 11.019309149 | -1.898805663 |
| C92  | -4.072088558  | 11.949740361 | 2.224748249  |
| C93  | -3.987087467  | 13.052273811 | 3.272341182  |
| C94  | -4.730065191  | 10.682528654 | 2.837976677  |
| C95  | -4.970889611  | 9.609310697  | 1.8011116854 |
| C96  | -6.150564398  | 9.608627094  | 1.041331940  |
| C97  | -4.006950445  | 8.625643427  | 1.527182959  |
| C98  | -6.355298483  | 8.672791661  | 0.026129590  |
| C99  | -4.182611232  | 7.696301628  | 0.497184476  |
| C100 | -5.357235727  | 7.737241669  | -0.248077229 |
| C101 | 4.088364911   | -3.985331562 | -9.001037546 |
| C102 | 2.661830113   | -3.730783361 | -8.546588570 |
| C103 | 1.207297113   | -2.191792932 | -7.247083961 |
| C104 | 0.708717696   | -0.836256597 | -7.760743993 |
| C105 | 1.124578999   | 1.586986392  | -7.716629692 |
| C106 | 2.300459263   | 2.539902862  | -7.920535228 |
| C107 | 4.581077826   | 3.208966172  | -7.411894470 |
| C108 | 5.162142175   | 3.377421658  | -8.801998307 |
| C109 | -2.761880474  | -3.496528334 | -9.158939627 |
| C110 | -3.788607840  | -2.405922469 | -8.829226411 |
| C111 | -2.270993789  | -4.169443443 | -7.856083064 |
| C112 | -1.538571701  | -5.490743135 | -8.153102644 |
| C113 | -0.863382347  | -6.019307423 | -6.907655822 |
| C114 | -4.192582404  | -0.087073912 | -8.169164276 |
| C115 | -3.714203140  | 1.197242556  | -8.817129279 |
| C116 | -4.560754284  | 0.044764164  | -6.669775880 |
| C117 | -3.322767519  | 0.057487548  | -5.817290603 |
| C118 | -2.595373286  | 1.244282811  | -5.620025192 |
| C119 | -2.789599477  | -1.152725465 | -5.344036724 |
| C120 | -1.322547463  | 1.199860709  | -5.041002954 |
| C121 | -1.518351652  | -1.196600009 | -4.764472165 |
| C122 | -0.768470596  | -0.022102569 | -4.647516223 |
| C123 | 7.922921952   | -6.240555659 | -4.772095667 |

|       |              |               |              |
|-------|--------------|---------------|--------------|
| C124  | 9.103312290  | -6.321718291  | -3.793460954 |
| C125  | 6.610409896  | -6.597581993  | -4.059753367 |
| C126  | 5.358639304  | -6.400064866  | -4.849245736 |
| C127  | 5.011202522  | -6.998314035  | -6.043208255 |
| C128  | 3.269034070  | -5.889849146  | -5.247543885 |
| C129  | 10.311103612 | -7.541660883  | -2.087623104 |
| C130  | 11.664174590 | -7.322840257  | -2.728391490 |
| C131  | 0.603098417  | -6.932125784  | -0.195862564 |
| C132  | 2.092700190  | -6.969093411  | 0.121881667  |
| C133  | 3.015584641  | -7.100717579  | -1.127684093 |
| C134  | 2.932651912  | -8.543466711  | -1.690425825 |
| C135  | 3.965853350  | -8.879741669  | -2.768072745 |
| C136  | 3.991897652  | -10.368616690 | -3.175839365 |
| C137  | 4.467384791  | -6.824231496  | -0.698767397 |
| C138  | 3.583162598  | -0.695280084  | -2.235541850 |
| Fe139 | 3.845179961  | -2.004294550  | -3.720260801 |
| Fe140 | 2.241838830  | 0.614220582   | -1.296601789 |
| Fe141 | 5.059450402  | 0.470682412   | -1.581432131 |
| Fe142 | 3.742764385  | 0.507236673   | -3.791271237 |
| Fe143 | 3.915282703  | 2.724000460   | -2.398813727 |
| Fe144 | 4.686352379  | -2.063248886  | -1.312102731 |
| Fe145 | 2.156998044  | -2.424164658  | -1.788493399 |
| H146  | -6.352788359 | -7.528256342  | 0.344278997  |
| H147  | -6.529340893 | -6.534730222  | -0.938615173 |
| H148  | -9.709888673 | -4.795978048  | 1.383335975  |
| H149  | -8.839464788 | -6.129938897  | -0.404369636 |
| H150  | -8.682099373 | -7.247263357  | 0.947754649  |
| H151  | -7.902417115 | -2.729878084  | 2.051061083  |
| H152  | -8.674284509 | -5.610440032  | 3.964464316  |
| H153  | -9.527780255 | -2.951444909  | 2.731529911  |
| H154  | -7.912921579 | -6.259185184  | 6.065192111  |
| H155  | -6.034521945 | -5.843511115  | 3.654149643  |
| H156  | -7.715510568 | -4.548639463  | 6.507478545  |
| H157  | -2.889409502 | -1.776752374  | 3.211182827  |
| H158  | -4.996443177 | -3.702088743  | 3.056349447  |
| H159  | -3.756360521 | -6.180794070  | 3.306305941  |
| H160  | -4.780957138 | -0.089661403  | 7.161097309  |
| H161  | -5.664552467 | -2.301204776  | 5.518373045  |
| H162  | -3.474918222 | -6.282021688  | 5.062579649  |
| H163  | -4.621999447 | -1.449145279  | 2.987832504  |
| H164  | -4.219835457 | -3.642928275  | 7.490097432  |
| H165  | -5.919573506 | -1.378248111  | 7.641173816  |
| H166  | -0.427778321 | -3.297058709  | 3.634319391  |
| H167  | -0.719565191 | -2.191878487  | 2.277300642  |
| H168  | 0.938360283  | -2.463029530  | 2.835955409  |
| H169  | -1.286291401 | -1.180754279  | 4.528367268  |
| H170  | -3.351994677 | -4.698290161  | 9.384953675  |
| H171  | -1.873133278 | 2.035409191   | 5.316355181  |
| H172  | -1.448560016 | -0.256628266  | 9.207301265  |
| H173  | -1.719104977 | 3.170964635   | 9.525349956  |
| H174  | 0.842736921  | 0.158759871   | 2.817981596  |
| H175  | 0.125496180  | 0.990705608   | 4.218435715  |
| H176  | 9.312314808  | 1.991632980   | 4.465251113  |
| H177  | -2.825174819 | 3.386620848   | 5.952656473  |
| H178  | -2.700875725 | 4.056683960   | 8.335141639  |
| H179  | -1.059070830 | 3.552327179   | 5.790812223  |
| H180  | -0.926390923 | 4.207730832   | 8.315068910  |
| H181  | -2.513821988 | 1.639150443   | 7.715944853  |
| H182  | 0.466106647  | 2.198615425   | 7.274743105  |
| H183  | -1.277010567 | 0.048896085   | 6.402257073  |
| H184  | -0.900584154 | 0.457720107   | 2.884044009  |
| H185  | 1.573222604  | 4.252544276   | 0.229435345  |
| H186  | 0.742668604  | 4.513273644   | 1.787489031  |
| H187  | 2.671338234  | 5.323250892   | 2.324043289  |
| H188  | 3.215934460  | 4.680231875   | 4.861284333  |
| H189  | 4.780643930  | 4.201786022   | 1.723494269  |
| H190  | 6.605395634  | 2.557898254   | 1.381163749  |
| H191  | 6.505958931  | 1.574170736   | 5.580681898  |
| H192  | -0.780280055 | -2.651229075  | 6.338999388  |
| H193  | 0.229143274  | -5.641989223  | 6.434102013  |
| H194  | 0.838033227  | -5.069004383  | 8.001100362  |
| H195  | -1.849241278 | -4.515861155  | 6.836824662  |
| H196  | -2.844456156 | -3.121316748  | 10.039215909 |
| H197  | 4.640098767  | 3.178451658   | 5.911522331  |
| H198  | 1.672605226  | -1.602708180  | 5.058786660  |
| H199  | -0.753253808 | 0.707313123   | 11.737211829 |
| H200  | -0.962062613 | -1.012831692  | 11.320139232 |
| H201  | 1.649462989  | -0.730814682  | 10.476693484 |
| H202  | 11.147772590 | -7.045671918  | 4.027445241  |
| H203  | -1.752290577 | -5.979734589  | -4.127840901 |

|      |               |              |               |
|------|---------------|--------------|---------------|
| H204 | 1.226949414   | -6.079342047 | -1.808093574  |
| H205 | -2.269402788  | -6.241299820 | -8.487778637  |
| H206 | -0.801182501  | -5.344598892 | -8.955426768  |
| H207 | -3.121785202  | -4.373922622 | -7.187565870  |
| H208 | -3.103322889  | 1.045044151  | -9.738081137  |
| H209 | -3.349065271  | -4.242883530 | -9.715520458  |
| H210 | -3.353925481  | -2.191194592 | -2.295271747  |
| H211 | -3.947914618  | -4.973272776 | -1.163338019  |
| H212 | -2.281263266  | -1.029840144 | -8.437066626  |
| H213 | -5.133522480  | -0.322722904 | -8.707960501  |
| H214 | -1.041472461  | -2.407843317 | -9.573277595  |
| H215 | -1.317800537  | -5.846248621 | -2.427592600  |
| H216 | -1.613323287  | -3.467522852 | -7.319582735  |
| H217 | -1.208700245  | -3.776870182 | -10.472735844 |
| H218 | -6.743312994  | -3.460079107 | -2.859067889  |
| H219 | -3.472280662  | -2.416464299 | -0.535750749  |
| H220 | 0.830521238   | -5.295833460 | -7.587307872  |
| H221 | -2.316967868  | -4.335181366 | -1.039706279  |
| H222 | -3.832292321  | 2.606087596  | 3.079219827   |
| H223 | -2.986195729  | 0.532894633  | 1.368955573   |
| H224 | -8.136025074  | 0.773613553  | 3.805590757   |
| H225 | -7.261371225  | -0.074722114 | 1.077571939   |
| H226 | -6.931470460  | 4.079822158  | 2.371561946   |
| H227 | -8.328640246  | 8.743884922  | 4.411328805   |
| H228 | -6.901890296  | 5.236898387  | 5.321739702   |
| H229 | -8.929878848  | 5.436872521  | 3.433387909   |
| H230 | -6.265542173  | 6.837128329  | 2.766927423   |
| H231 | -10.863264529 | 9.523714483  | 1.109213461   |
| H232 | -3.258661048  | 4.249355468  | 1.292983935   |
| H233 | -4.811752891  | 3.969940650  | 0.492821706   |
| H234 | -9.831158680  | 10.451600867 | 3.253548874   |
| H235 | -8.365284355  | 5.645599812  | 1.774743390   |
| H236 | -6.172661110  | 2.017014613  | 1.373863380   |
| H237 | -7.013283549  | -0.556014935 | 3.514713696   |
| H238 | -9.863821786  | 1.921642235  | -0.218436923  |
| H239 | -2.186348784  | 1.514875861  | -2.688291675  |
| H240 | -10.209312741 | 0.183422129  | -0.149025338  |
| H241 | 10.295693212  | 3.215436618  | 2.673056076   |
| H242 | 8.687780808   | 3.318685534  | 2.403415916   |
| H243 | 1.553274549   | 5.981587051  | -1.437812936  |
| H244 | -0.708385543  | 5.490190292  | 0.273369733   |
| H245 | 1.736149212   | 8.070899932  | 0.309085549   |
| H246 | -3.441307280  | 3.540744390  | -1.610779703  |
| H247 | -5.115313848  | 4.160638372  | -2.788737264  |
| H248 | -6.707210240  | 3.389970532  | -4.171950333  |
| H249 | -4.799477465  | 5.410134952  | -1.851475441  |
| H250 | -5.529291340  | 1.249287738  | -4.073588644  |
| H251 | -7.310273855  | 1.273564131  | -3.874005637  |
| H252 | -0.056540098  | 11.611773455 | -1.863327980  |
| H253 | -1.241125734  | 12.921156430 | -1.683818317  |
| H254 | -0.910442646  | 10.183499022 | -3.327408112  |
| H255 | -2.587156062  | 9.636964857  | -3.301911015  |
| H256 | -3.700638274  | 9.197053683  | -6.041108774  |
| H257 | -2.650538003  | 4.852864411  | -5.748995350  |
| H258 | -7.285296512  | 8.675837097  | -0.548392323  |
| H259 | -3.093752285  | 8.561667904  | 2.124180797   |
| H260 | -4.696253337  | 7.774284074  | -2.963463726  |
| H261 | 1.063752520   | 5.381181344  | -3.890911399  |
| H262 | 2.344363623   | 7.198601920  | -3.247286557  |
| H263 | -1.392887282  | 4.885371885  | -3.353057756  |
| H264 | -8.363295319  | -0.216555804 | -1.481164434  |
| H265 | 3.649384458   | 9.999663055  | -4.147666853  |
| H266 | -6.093447955  | -0.956803492 | -3.066301997  |
| H267 | 0.535470484   | 6.363335675  | -5.253825405  |
| H268 | -3.392600372  | 6.981987706  | 0.261759164   |
| H269 | 3.349109542   | 10.308265309 | -2.423712628  |
| H270 | -2.957438058  | 7.765225488  | -6.672921268  |
| H271 | -5.109110235  | 8.947703631  | -4.168716326  |
| H272 | -5.175678395  | -3.521921599 | -3.438222718  |
| H273 | -5.764376335  | -3.338079019 | -0.790573330  |
| H274 | -6.929873906  | 10.346282901 | 1.246430550   |
| H275 | -5.249983984  | 1.386788497  | -1.602320080  |
| H276 | -0.486763118  | 8.026348596  | -3.704355561  |
| H277 | -1.739900783  | 6.345315133  | -5.999423840  |
| H278 | -0.678697670  | 4.206564495  | -4.808642710  |
| H279 | -3.602400802  | 5.875305936  | -3.676585956  |
| H280 | 0.806266324   | 8.923291598  | 2.939870093   |
| H281 | -0.460615719  | 9.759125587  | 0.102978127   |
| H282 | -0.085765758  | 12.624892301 | 0.382286649   |
| H283 | 2.275830912   | 9.441716469  | 2.078452720   |

|      |              |               |               |
|------|--------------|---------------|---------------|
| H284 | -2.440769395 | 10.652747946  | 1.736093251   |
| H285 | 4.608531188  | -3.028540365  | -9.154824680  |
| H286 | 4.587172867  | -4.487851498  | -8.145207456  |
| H287 | 7.884597383  | -5.187458747  | -5.088227689  |
| H288 | 5.048669606  | -5.099258082  | -10.411382004 |
| H289 | 3.511247043  | -5.584071026  | -10.122779054 |
| H290 | 5.509345379  | 4.776017928   | -0.925030971  |
| H291 | 5.726126335  | 7.442357556   | 0.535829260   |
| H292 | 4.833703145  | 8.087575728   | -3.591303162  |
| H293 | 4.105566741  | 5.596571904   | -0.172807155  |
| H294 | 6.798877010  | 8.063348877   | -0.529717715  |
| H295 | 5.390896728  | 2.851157576   | -6.757169232  |
| H296 | 5.981450278  | 6.754353441   | -2.305547315  |
| H297 | 5.308845637  | -7.014076155  | 4.981645643   |
| H298 | 7.058377635  | -7.887161738  | 2.617599358   |
| H299 | 3.635158082  | 1.401180388   | -6.786645989  |
| H300 | 5.130941807  | -0.108292806  | 3.256377704   |
| H301 | 0.559349063  | 1.554383620   | -8.655579200  |
| H302 | -1.103125600 | -2.147326276  | -4.422511575  |
| H303 | 0.469740127  | 2.064419837   | -6.967105152  |
| H304 | 4.267478528  | -4.501974430  | 4.491449265   |
| H305 | 2.129752906  | 0.032951766   | -6.590047777  |
| H306 | 3.936921843  | -5.090151957  | 2.857475243   |
| H307 | 4.777077559  | -7.305619286  | 3.308404980   |
| H308 | 6.428673000  | -5.486796378  | 2.560528774   |
| H309 | 6.668062816  | -5.068620239  | 4.264122464   |
| H310 | -5.205989910 | -0.806143111  | -6.407416808  |
| H311 | 5.931559296  | -9.465314886  | 4.895034082   |
| H312 | 4.981858602  | -11.775886912 | 3.145085276   |
| H313 | 0.239975726  | -0.043295830  | -4.239087736  |
| H314 | 6.319009625  | -11.807096526 | 5.742158932   |
| H315 | 4.760706124  | -12.144908796 | 5.369351395   |
| H316 | 5.529676607  | -3.344303711  | 2.030508807   |
| H317 | -0.741930029 | 2.113838441   | -4.904658587  |
| H318 | -3.362542236 | -2.076427891  | -5.449951305  |
| H319 | 7.630264860  | -9.933054571  | -1.671310990  |
| H320 | 6.643181458  | -7.657901077  | -3.755089919  |
| H321 | 6.626685051  | -8.174921133  | -0.101655445  |
| H322 | 6.769853673  | -10.538872644 | -2.817610314  |
| H323 | 4.936833300  | 2.546312300   | -9.512731611  |
| H324 | 6.336287704  | -5.048292655  | -0.201614768  |
| H325 | 2.288700116  | -7.779042088  | 0.835020166   |
| H326 | 3.283860273  | -2.020441674  | -7.614770658  |
| H327 | 3.067213600  | -9.227880830  | -0.838157479  |
| H328 | 3.114398244  | -6.986309854  | -7.039884066  |
| H329 | 2.255902003  | -5.519769036  | -5.166606934  |
| H330 | 6.587912195  | -12.427038418 | 3.497399167   |
| H331 | 5.719164289  | -1.066319804  | 1.932722511   |
| H332 | 8.353020620  | -5.799072400  | 0.803353177   |
| H333 | 7.234138269  | -3.785860401  | -0.135378357  |
| H334 | 8.971598052  | -6.853311957  | 2.794181471   |
| H335 | 3.710655391  | -2.725789611  | 5.128101152   |
| H336 | 3.750905166  | -8.291925864  | -3.673465464  |
| H337 | 4.973956840  | -8.597889324  | -2.435050856  |
| H338 | 1.916404246  | -8.710137652  | -2.079833221  |
| H339 | 1.342570654  | -2.162165158  | -6.154028859  |
| H340 | -3.014219075 | 2.192755276   | -5.964766606  |
| H341 | -5.144893055 | 0.970778640   | -6.559909398  |
| H342 | 2.313190324  | -6.015419628  | 0.630520624   |
| H343 | 8.507710528  | -7.331595998  | 0.582209563   |
| H344 | 7.413124641  | -9.252690382  | 0.672853245   |
| H345 | 4.154764771  | -1.064281553  | 5.096617229   |
| H346 | 5.578403158  | -7.634193996  | -6.710459429  |
| H347 | 6.538713994  | -6.020200106  | -3.130284201  |
| H348 | 0.459428591  | -2.946837920  | -7.496212778  |
| H349 | 4.258442164  | 4.191967558   | -7.035991738  |
| H350 | 7.768224961  | 0.149917000   | 3.957121224   |
| H351 | 7.788999781  | 0.558950771   | 2.227261545   |
| H352 | 8.999008994  | -6.759550777  | -6.439154113  |
| H353 | 8.270992765  | -8.038595759  | -5.721548036  |
| H354 | 10.306750170 | -8.558881115  | -1.666033878  |
| H355 | 8.564774835  | -8.230750967  | -3.099595382  |
| H356 | 11.703790103 | -7.555518641  | -3.820184991  |
| H357 | 10.177133868 | -6.838455818  | -1.250218980  |
| H358 | 10.543492301 | 0.315322560   | 2.191034338   |
| H359 | -2.978613378 | 13.199599340  | 3.725733904   |
| H360 | 10.213201286 | -6.862678641  | 5.534900115   |
| H361 | 9.557210696  | -4.441110713  | 4.393137672   |
| H362 | -4.709047478 | 12.321019835  | 1.404634197   |
| H363 | -4.090015787 | 10.302172154  | 3.649567576   |

|       |              |               |               |
|-------|--------------|---------------|---------------|
| H364  | -5.680672042 | 10.998031918  | 3.291663293   |
| H365  | 1.100424475  | -3.321540966  | -1.183893460  |
| H366  | 3.634098971  | -1.126589134  | 0.084859674   |
| H367  | -6.452046396 | 6.809921691   | -1.565914080  |
| H368  | 0.126189547  | -1.137142546  | -0.428976530  |
| H369  | -1.958997570 | -0.220266584  | -0.862506259  |
| Mo370 | 3.816463272  | -4.419802359  | -2.432163582  |
| N371  | -7.034911316 | -7.191334080  | -0.339373125  |
| N372  | -8.779771087 | -4.631786934  | 1.761064957   |
| N373  | -8.116738090 | -4.930202951  | 4.475377860   |
| N374  | -5.435607002 | -5.785227455  | 4.479254078   |
| N375  | -4.200844843 | -3.381052879  | 3.605085237   |
| N376  | -4.881618472 | -1.746249359  | 5.873853655   |
| N377  | -3.647068919 | -3.070855940  | 8.116566443   |
| N378  | -1.111351793 | -4.475295042  | 7.546366319   |
| N379  | 0.213851278  | -2.566703462  | 6.136492152   |
| N380  | -0.381566429 | 0.360154677   | 6.786288079   |
| N381  | -0.659282765 | 0.203431396   | 9.668081256   |
| N382  | 5.532756551  | -11.510447013 | 5.159376754   |
| N383  | 6.389217641  | -9.260959722  | 4.000503832   |
| N384  | 5.038515671  | -3.316138092  | 2.928215450   |
| N385  | 4.310288865  | -1.998208853  | 4.726471062   |
| N386  | 5.380999544  | -1.028656082  | 2.906131820   |
| N387  | 9.042353702  | -6.964084979  | 3.830119399   |
| N388  | -5.859780434 | -2.949226291  | -2.909499105  |
| N389  | -1.947475062 | -5.595773789  | -3.196903718  |
| N390  | -6.080951901 | -0.447198104  | -2.166509907  |
| N391  | -8.349613595 | 0.650217669   | -0.947947000  |
| N392  | -7.848882186 | 0.351983011   | 1.801533664   |
| N393  | -5.690159275 | 2.086771146   | 2.274392269   |
| N394  | -3.119161731 | 2.678496819   | -1.100653451  |
| N395  | -2.436212309 | 0.671659461   | -0.715259966  |
| N396  | -6.322924116 | 4.729721448   | 2.863250588   |
| N397  | -9.770621984 | 7.726727474   | 1.587087626   |
| N398  | -9.667941830 | 9.512369309   | 2.900283823   |
| N399  | 9.474964519  | 2.664346239   | 2.409961953   |
| N400  | 6.287672861  | 7.208983312   | -0.289480608  |
| N401  | 4.213898222  | 8.450804537   | -2.872011347  |
| N402  | 1.556211529  | 7.846548705   | -3.349507480  |
| N403  | -3.174517815 | 6.405218819   | -4.457230862  |
| N404  | -3.362520166 | 8.253345932   | -5.882468262  |
| N405  | -4.456142667 | 8.240630492   | -3.841826807  |
| N406  | 0.658035691  | 6.334531175   | -1.068073170  |
| N407  | 0.975634151  | 8.228902480   | 0.976651660   |
| N408  | -0.367593888 | 10.612473402  | 0.653169992   |
| N409  | -1.886769234 | 10.328056218  | -3.040395200  |
| N410  | -2.750353555 | 11.620903032  | 1.705411367   |
| N411  | 4.099983331  | -4.755428735  | -10.246404475 |
| N412  | 2.465271392  | -2.577678115  | -7.873643142  |
| N413  | 1.429488179  | 0.222051903   | -7.326135997  |
| N414  | 3.499094744  | 2.238564266   | -7.359810334  |
| N415  | -1.724906907 | -2.993046133  | -10.068331807 |
| N416  | -3.293428824 | -1.180733658  | -8.488662355  |
| N417  | 8.132674745  | -7.056977472  | -5.981331987  |
| N418  | 4.256310345  | -5.694041663  | -4.372267302  |
| N419  | 3.695441482  | -6.662759803  | -6.271262960  |
| N420  | 9.233862805  | -7.457511588  | -3.056472906  |
| N421  | 0.156048544  | 2.245066318   | 0.007205680   |
| N422  | 2.670053350  | -0.540933314  | 0.379013188   |
| N423  | 0.991295008  | 1.652326955   | -0.463338751  |
| N424  | 2.156463355  | -0.722289860  | 1.414967675   |
| O425  | -6.563744414 | -5.137918645  | 1.630813568   |
| O426  | -7.265164017 | -2.814339543  | 4.495331447   |
| O427  | -5.279568037 | -5.196439401  | 6.679930760   |
| O428  | -2.464480108 | -3.966158487  | 4.960384776   |
| O429  | -3.059716018 | -0.490850254  | 5.363371867   |
| O430  | -3.282343569 | -0.974837128  | 8.966058631   |
| O431  | -0.532396770 | -3.974279089  | 9.704329021   |
| O432  | 2.187378133  | -3.755972008  | 6.116895068   |
| O433  | 1.897743824  | 0.242613021   | 6.647426507   |
| O434  | 0.862494738  | 1.888682207   | 9.694906829   |
| O435  | 1.552276923  | -0.257647177  | 12.458076916  |
| O436  | 7.058060573  | -10.330725349 | 2.062779534   |
| O437  | 8.023979670  | -7.682660479  | 5.762849696   |
| O438  | 11.587793666 | -4.534434807  | 4.549233226   |
| O439  | -5.618814390 | -0.844549279  | 0.045063590   |
| O440  | -3.697147418 | -4.393947215  | -4.013901196  |
| O441  | -7.126855296 | 2.499711438   | -0.398705421  |
| O442  | -6.337946750 | 3.043029089   | -3.340252338  |
| O443  | -9.779628428 | 1.494072828   | 2.287721825   |

|                                   |      |              |                                 |              |
|-----------------------------------|------|--------------|---------------------------------|--------------|
|                                   | O444 | -5.657637413 | 1.522275163                     | 4.487983540  |
|                                   | O445 | -4.254258916 | 5.045833425                     | 3.778262194  |
|                                   | O446 | -6.577285321 | 7.252596601                     | 5.335395402  |
|                                   | O447 | 10.779336415 | -0.081125801                    | 4.180195197  |
|                                   | O448 | 3.562082987  | 4.693910030                     | 3.950025406  |
|                                   | O449 | 3.595601745  | 8.367515756                     | -0.680159478 |
|                                   | O450 | 0.993940144  | 10.071105659                    | -3.518822520 |
|                                   | O451 | -1.406425874 | 7.195939240                     | -1.532854388 |
|                                   | O452 | -0.694822049 | 7.186412143                     | 2.156772936  |
|                                   | O453 | 2.430462263  | 5.700812607                     | 1.453402452  |
|                                   | O454 | 0.856845644  | 11.619072340                    | 2.307300398  |
|                                   | O455 | -2.507731449 | 13.586765619                    | 0.576437615  |
|                                   | O456 | -3.264345967 | 10.998231201                    | -1.343864010 |
|                                   | O457 | -4.952264492 | 13.711315469                    | 3.622889595  |
|                                   | O458 | -5.506001416 | 6.838262335                     | -1.324100215 |
|                                   | O459 | 1.757213038  | -4.572584358                    | -8.765833522 |
|                                   | O460 | -0.271883551 | -0.737719898                    | -8.526689315 |
|                                   | O461 | 2.115965869  | 3.597761853                     | -8.545345724 |
|                                   | O462 | 5.859736255  | 4.324626975                     | -9.124809042 |
|                                   | O463 | -5.008733349 | -2.637010973                    | -8.853419832 |
|                                   | O464 | -1.466796003 | -6.603303865                    | -6.013892196 |
|                                   | O465 | 0.457637819  | -5.779254856                    | -6.786677528 |
|                                   | O466 | -4.000779586 | 2.320077214                     | -8.424976640 |
|                                   | O467 | 9.939642792  | -5.401954999                    | -3.700223237 |
|                                   | O468 | 12.663957181 | -6.985799753                    | -2.110983745 |
|                                   | O469 | 0.286724619  | -6.300159032                    | -1.335232726 |
|                                   | O470 | -0.257196947 | -7.390152724                    | 0.553164379  |
|                                   | O471 | 5.144001401  | -10.903763359                   | -3.350805717 |
|                                   | O472 | 2.882902002  | -10.951489470                   | -3.338257664 |
|                                   | O473 | 5.067568539  | -5.826343562                    | -1.288906463 |
|                                   | O474 | 5.016497446  | -7.545548553                    | 0.156927513  |
|                                   | O475 | 2.608094347  | -6.131166282                    | -2.095770255 |
|                                   | O476 | 8.946579302  | -6.556084273                    | 1.031388764  |
|                                   | O477 | 6.965166566  | -4.561191579                    | 0.393084710  |
|                                   | O478 | -4.382769733 | 4.746938142                     | -2.456184011 |
|                                   | O479 | 7.720972805  | -10.428549597                   | -2.515526870 |
|                                   | O480 | 7.510941842  | -8.630694431                    | -0.092215130 |
|                                   | S481 | 3.612820364  | 4.968443231                     | -2.475077754 |
|                                   | S482 | 2.021473158  | 1.862598611                     | -3.291446415 |
|                                   | S483 | 2.091335253  | -3.404525488                    | -3.729563830 |
|                                   | S484 | 3.951413338  | 1.944993059                     | -0.339328504 |
|                                   | S485 | 0.504174108  | -0.900968428                    | -1.720026636 |
|                                   | S486 | 4.049448250  | -0.772998207                    | -5.552753541 |
|                                   | S487 | 3.322571810  | -3.507057232                    | -0.276773293 |
|                                   | S488 | 5.633234855  | 1.650166564                     | -3.416567448 |
|                                   | S489 | 5.679183464  | -3.077837723                    | -3.013277994 |
|                                   | S490 | 6.302739363  | -0.883327078                    | -0.365584215 |
|                                   | end  |              |                                 |              |
| product <b>Fe2-NH-N-b</b> (S=3/2) |      |              | <b>bm522n2ntoNHN335tc.car_4</b> |              |
| Fe( 139) -2.303                   | C1   | -7.744387633 | -5.369816252                    | 1.291005632  |
| Fe( 140) 0.059                    | C2   | -8.108727253 | -6.522111184                    | 0.347124489  |
| Fe( 141) -2.453                   | C3   | -8.601287862 | -3.459654917                    | 2.577013619  |
| Fe( 142) 2.333                    | C4   | -7.964991669 | -3.722103157                    | 3.939314710  |
| Fe( 143) 2.802                    | C5   | -7.539074251 | -5.319649326                    | 5.742628570  |
| Fe( 144) 1.879                    | C6   | -6.013095132 | -5.432903234                    | 5.677943417  |
| Fe( 145) 0.987                    | C7   | -4.034616570 | -5.741964993                    | 4.285422501  |
|                                   | C8   | -3.496843338 | -4.308732812                    | 4.319279624  |
|                                   | C9   | -3.906686639 | -1.976827275                    | 3.667506309  |
|                                   | C10  | -3.923447821 | -1.359078593                    | 5.074365524  |
|                                   | C11  | -4.949398151 | -1.212097025                    | 7.251538288  |
|                                   | C12  | -3.872925594 | -1.770670083                    | 8.194504231  |
|                                   | C13  | -2.866446384 | -3.792747195                    | 9.152067069  |
|                                   | C14  | -1.394967538 | -4.083346494                    | 8.824441793  |
|                                   | C15  | 0.251404786  | -4.750172123                    | 7.116532019  |
|                                   | C16  | 0.984879451  | -3.616419014                    | 6.391339841  |
|                                   | C17  | 0.655050880  | -1.353788110                    | 5.400379290  |
|                                   | C18  | 0.779800981  | -0.146403801                    | 6.343488240  |
|                                   | C19  | -0.254912592 | -1.130316490                    | 4.166477829  |
|                                   | C20  | -0.047277707 | 0.240713255                     | 3.514439848  |
|                                   | C21  | -0.082930048 | -2.277608459                    | 3.160432209  |
|                                   | C22  | -0.373730341 | 1.587141535                     | 7.644636296  |
|                                   | C23  | -0.015875349 | 1.250009318                     | 9.102147572  |
|                                   | C24  | -1.707163600 | 2.360087629                     | 7.506200065  |
|                                   | C25  | -1.782633306 | 3.524661180                     | 8.498911353  |
|                                   | C26  | -1.886902515 | 2.871697343                     | 6.070212770  |
|                                   | C27  | -0.422930018 | -0.108935577                    | 11.064842130 |
|                                   | C28  | 1.041504065  | -0.383840184                    | 11.343902912 |
|                                   | C29  | 5.893129403  | -11.617683456                   | 3.723979701  |
|                                   | C30  | 6.519052464  | -10.337481890                   | 3.181345349  |
|                                   | C31  | 6.803924547  | -7.918066859                    | 3.685768545  |

|      |               |              |              |
|------|---------------|--------------|--------------|
| C32  | 8.028897712   | -7.526001673 | 4.531540634  |
| C33  | 5.626605929   | -6.960060378 | 3.929721369  |
| C34  | 5.955585373   | -5.517546346 | 3.553636750  |
| C35  | 4.702454160   | -4.647696063 | 3.486330027  |
| C36  | 4.881296752   | -2.146594622 | 3.502931593  |
| C37  | 10.277928127  | -6.550651863 | 4.469793274  |
| C38  | 10.473618726  | -5.051413944 | 4.464178842  |
| C39  | -5.346404923  | -2.678792985 | -1.574268288 |
| C40  | -5.705788688  | -1.243607588 | -1.143789804 |
| C41  | -3.808495737  | -2.821836745 | -1.509340822 |
| C42  | -3.251730199  | -4.254925238 | -1.628013950 |
| C43  | -2.984751587  | -4.742205258 | -3.052893610 |
| C44  | -6.175396005  | 0.997350092  | -2.053148530 |
| C45  | -7.261173787  | 1.461561187  | -1.071599602 |
| C46  | -6.349354212  | 1.605987009  | -3.450247967 |
| C47  | -9.417463368  | 0.952790841  | -0.022499485 |
| C48  | -9.019556009  | 0.963369519  | 1.456542698  |
| C49  | -7.318014885  | 0.429949410  | 3.136296066  |
| C50  | -6.144179803  | 1.386462053  | 3.353054839  |
| C51  | -4.607846189  | 3.050914320  | 2.430947301  |
| C52  | -5.045507449  | 4.360103990  | 3.128396631  |
| C53  | -4.021303829  | 3.486699404  | 1.079918749  |
| C54  | -3.392877909  | 2.429438251  | 0.235215239  |
| C55  | -2.938949694  | 1.156869297  | 0.473178607  |
| C56  | -2.507694090  | 1.638345877  | -1.659396700 |
| C57  | -6.847530593  | 6.037033250  | 3.253182972  |
| C58  | -6.742698087  | 6.199628565  | 4.768632432  |
| C59  | -8.325279492  | 6.095405627  | 2.799543668  |
| C60  | -8.940645035  | 7.458997421  | 2.676820844  |
| C61  | -8.872766536  | 8.561994809  | 3.505769937  |
| C62  | -10.175889642 | 8.985507639  | 1.764473343  |
| C63  | 9.240340850   | 1.640252728  | 3.402873909  |
| C64  | 10.278901934  | 0.547217813  | 3.230647466  |
| C65  | 7.848031100   | 0.987305816  | 3.227303624  |
| C66  | 6.714857236   | 1.961442311  | 3.446346925  |
| C67  | 6.130881601   | 2.141089935  | 4.712623980  |
| C68  | 6.218261403   | 2.731916948  | 2.379516191  |
| C69  | 5.085115096   | 3.051237174  | 4.910317307  |
| C70  | 5.191796219   | 3.657677488  | 2.564644495  |
| C71  | 4.618357637   | 3.810107282  | 3.829044626  |
| C72  | 5.373367409   | 6.852389835  | -1.413895731 |
| C73  | 4.315671359   | 7.950391044  | -1.620394701 |
| C74  | 4.707005811   | 5.508943614  | -1.119754289 |
| C75  | 3.310346562   | 9.541770502  | -3.219135843 |
| C76  | 1.834936533   | 9.165164409  | -3.380819866 |
| C77  | 0.215233447   | 7.268138235  | -3.340851408 |
| C78  | -0.246356216  | 6.927759856  | -1.900541551 |
| C79  | 0.243221873   | 6.021837786  | -4.253724004 |
| C80  | -1.011867509  | 5.146632979  | -4.357136934 |
| C81  | -2.157054601  | 5.685807012  | -5.230863844 |
| C82  | -3.680504640  | 7.602004574  | -4.749735276 |
| C83  | 0.284653035   | 5.973425315  | 0.291665442  |
| C84  | 0.121606469   | 7.186954973  | 1.218375713  |
| C85  | 1.292482767   | 5.009070377  | 0.950124997  |
| C86  | 1.194092803   | 9.252121074  | 1.974556281  |
| C87  | 0.554229295   | 10.598179848 | 1.669143221  |
| C88  | -0.848868425  | 11.872679920 | 0.137544412  |
| C89  | -2.124440764  | 12.427842092 | 0.814739875  |
| C90  | -0.998594775  | 11.882978258 | -1.385960447 |
| C91  | -2.150420733  | 11.029951000 | -1.902551856 |
| C92  | -4.069035289  | 11.949623471 | 2.225804574  |
| C93  | -3.985810593  | 13.055359667 | 3.269847441  |
| C94  | -4.729526537  | 10.684882321 | 2.840602192  |
| C95  | -4.970775992  | 9.611790858  | 1.804083900  |
| C96  | -6.146303487  | 9.617307532  | 1.038124519  |
| C97  | -4.010625649  | 8.623120832  | 1.535740240  |
| C98  | -6.350299755  | 8.682602786  | 0.021821485  |
| C99  | -4.185769379  | 7.694190172  | 0.505198290  |
| C100 | -5.356052464  | 7.741441158  | -0.246498106 |
| C101 | 4.085602104   | -3.991537375 | -9.000660572 |
| C102 | 2.659511195   | -3.732131688 | -8.548300345 |
| C103 | 1.203682159   | -2.185005993 | -7.260423649 |
| C104 | 0.701290291   | -0.833367784 | -7.780787438 |
| C105 | 1.114042474   | 1.592480940  | -7.741128351 |
| C106 | 2.296795413   | 2.539977116  | -7.935408095 |
| C107 | 4.580064067   | 3.190214283  | -7.418054766 |
| C108 | 5.139235927   | 3.384571699  | -8.814108890 |
| C109 | -2.759734940  | -3.497562893 | -9.171843521 |
| C110 | -3.786960785  | -2.405237495 | -8.848922350 |
| C111 | -2.270540445  | -4.165036351 | -7.866741159 |

|       |              |               |              |
|-------|--------------|---------------|--------------|
| C112  | -1.542433046 | -5.489534630  | -8.159696736 |
| C113  | -0.874571618 | -6.018031208  | -6.910469666 |
| C114  | -4.187950831 | -0.086385795  | -8.186434432 |
| C115  | -3.713246572 | 1.197196701   | -8.838438295 |
| C116  | -4.542680243 | 0.045922155   | -6.683996772 |
| C117  | -3.303507166 | 0.054978221   | -5.831240593 |
| C118  | -2.572843777 | 1.239441699   | -5.630169921 |
| C119  | -2.780830562 | -1.154434646  | -5.343991559 |
| C120  | -1.312440448 | 1.194154493   | -5.024010903 |
| C121  | -1.521942988 | -1.198990605  | -4.736565147 |
| C122  | -0.772459704 | -0.025690965  | -4.605461822 |
| C123  | 7.936766340  | -6.258375994  | -4.783422610 |
| C124  | 9.111328701  | -6.326176115  | -3.795733453 |
| C125  | 6.619159278  | -6.596388730  | -4.069186368 |
| C126  | 5.368244482  | -6.417854158  | -4.866055779 |
| C127  | 5.032466182  | -7.033188320  | -6.054142556 |
| C128  | 3.276071648  | -5.927393780  | -5.283208146 |
| C129  | 10.318385813 | -7.532433305  | -2.079633996 |
| C130  | 11.673777237 | -7.321695037  | -2.718597799 |
| C131  | 0.612026092  | -6.910719442  | -0.216416213 |
| C132  | 2.101739800  | -6.940634892  | 0.106191642  |
| C133  | 3.026902447  | -7.079956559  | -1.140240056 |
| C134  | 2.952458547  | -8.530628774  | -1.684710764 |
| C135  | 3.985278872  | -8.876427169  | -2.759336956 |
| C136  | 4.009197273  | -10.366659392 | -3.162362068 |
| C137  | 4.478792854  | -6.793168505  | -0.720028813 |
| C138  | 3.573510395  | -0.702900471  | -2.234995090 |
| Fe139 | 3.813469451  | -1.978898766  | -3.779657341 |
| Fe140 | 2.260843910  | 0.567513312   | -1.164972956 |
| Fe141 | 5.055510835  | 0.458179423   | -1.579227544 |
| Fe142 | 3.692161188  | 0.538507134   | -3.756382143 |
| Fe143 | 3.900063601  | 2.713089280   | -2.379606941 |
| Fe144 | 4.743550177  | -2.076620932  | -1.406364625 |
| Fe145 | 2.211049044  | -2.382169110  | -1.814460684 |
| H146  | -6.324788715 | -7.513574279  | 0.368086373  |
| H147  | -6.501832055 | -6.521935141  | -0.916265792 |
| H148  | -9.726434307 | -4.818847408  | 1.373898796  |
| H149  | -8.823538412 | -6.150145714  | -0.404891502 |
| H150  | -8.662140559 | -7.262750056  | 0.950303024  |
| H151  | -7.953447116 | -2.732912088  | 2.064906286  |
| H152  | -8.718294344 | -5.626253157  | 3.968891230  |
| H153  | -9.577328100 | -2.982849154  | 2.739725030  |
| H154  | -7.954203652 | -6.283204783  | 6.065573270  |
| H155  | -6.071897243 | -5.864013164  | 3.659678530  |
| H156  | -7.763803133 | -4.574875608  | 6.517141031  |
| H157  | -2.904505613 | -1.802261331  | 3.255537012  |
| H158  | -5.048125159 | -3.701588189  | 3.109917840  |
| H159  | -3.799874605 | -6.201399606  | 3.315790907  |
| H160  | -4.804798817 | -0.124413267  | 7.212720534  |
| H161  | -5.690168093 | -2.319271199  | 5.550676729  |
| H162  | -3.519976960 | -6.306407400  | 5.071851496  |
| H163  | -4.632426071 | -1.453581609  | 3.029184187  |
| H164  | -4.248506798 | -3.682248958  | 7.520701731  |
| H165  | -5.936377031 | -1.421915959  | 7.687118645  |
| H166  | -0.374851886 | -3.242174085  | 3.600733629  |
| H167  | -0.725233812 | -2.112073331  | 2.280211167  |
| H168  | 0.954341415  | -2.347735730  | 2.800023515  |
| H169  | -1.287702958 | -1.155386635  | 4.538270275  |
| H170  | -3.348520778 | -4.754174241  | 9.383791858  |
| H171  | -1.896140977 | 2.055611219   | 5.335917454  |
| H172  | -1.457346278 | -0.252722701  | 9.204093777  |
| H173  | -1.745448032 | 3.188371832   | 9.544871193  |
| H174  | 0.905163927  | 0.289027154   | 2.973037980  |
| H175  | -0.082174710 | 1.063039530   | 4.242931953  |
| H176  | 9.315898908  | 2.001677627   | 4.446310250  |
| H177  | -2.840571707 | 3.410306672   | 5.973564750  |
| H178  | -2.724277601 | 4.073630535   | 8.351763314  |
| H179  | -1.074283173 | 3.569036145   | 5.807265812  |
| H180  | -0.949839041 | 4.227822395   | 8.338588748  |
| H181  | -2.528144972 | 1.655509551   | 7.732761823  |
| H182  | 0.451242531  | 2.231093104   | 7.304017851  |
| H183  | -1.278100704 | 0.069844429   | 6.422141912  |
| H184  | -0.854772610 | 0.420962590   | 2.786390927  |
| H185  | 1.592249402  | 4.254298615   | 0.207844510  |
| H186  | 0.765307031  | 4.501718840   | 1.770376769  |
| H187  | 2.682462052  | 5.328768488   | 2.311969922  |
| H188  | 3.220384747  | 4.684083066   | 4.854371526  |
| H189  | 4.808831496  | 4.237473540   | 1.724296216  |
| H190  | 6.624577629  | 2.585809867   | 1.376054975  |
| H191  | 6.490041910  | 1.553589154   | 5.562603016  |



|      |               |              |               |
|------|---------------|--------------|---------------|
| H192 | -0.757456446  | -2.591213290 | 6.399783040   |
| H193 | 0.240394972   | -5.617777015 | 6.440905218   |
| H194 | 0.842719580   | -5.018175755 | 8.001548775   |
| H195 | -1.842928179  | -4.479595759 | 6.827158109   |
| H196 | -2.859487386  | -3.181824821 | 10.062910822  |
| H197 | 4.631190702   | 3.165073303  | 5.898919622   |
| H198 | 1.678944005   | -1.553575955 | 5.063591551   |
| H199 | -0.766449265  | 0.684774168  | 11.747509109  |
| H200 | -0.977486012  | -1.028247362 | 11.307761104  |
| H201 | 1.635722008   | -0.736646284 | 10.468709221  |
| H202 | 11.155981912  | -7.031602611 | 4.011890016   |
| H203 | -1.751642225  | -5.967414006 | -4.133741102  |
| H204 | 1.247260472   | -6.071888645 | -1.835167025  |
| H205 | -2.275708041  | -6.237312974 | -8.495568095  |
| H206 | -0.801801159  | -5.347173913 | -8.959657191  |
| H207 | -3.122018466  | -4.365399010 | -7.197845020  |
| H208 | -3.103256980  | 1.044191674  | -9.759922968  |
| H209 | -3.347476918  | -4.246786407 | -9.724605222  |
| H210 | -3.364913163  | -2.187138913 | -2.294991747  |
| H211 | -3.949750540  | -4.974036074 | -1.165743340  |
| H212 | -2.278388299  | -1.030980267 | -8.456780645  |
| H213 | -5.133142825  | -0.323085723 | -8.717316844  |
| H214 | -1.039848575  | -2.411930485 | -9.594270496  |
| H215 | -1.311515947  | -5.828932364 | -2.435204235  |
| H216 | -1.610871837  | -3.463225946 | -7.332914402  |
| H217 | -1.208885968  | -3.785492777 | -10.487041417 |
| H218 | -6.754973773  | -3.459508429 | -2.868597510  |
| H219 | -3.489069117  | -2.416930907 | -0.537725634  |
| H220 | 0.825078306   | -5.301545772 | -7.583146969  |
| H221 | -2.322399593  | -4.326847136 | -1.044846065  |
| H222 | -3.836310193  | 2.607203172  | 3.075909762   |
| H223 | -2.961554203  | 0.548086613  | 1.368243665   |
| H224 | -8.130591010  | 0.768574695  | 3.793580810   |
| H225 | -7.260439776  | -0.072267914 | 1.061722484   |
| H226 | -6.938170114  | 4.079061707  | 2.388447112   |
| H227 | -8.337836061  | 8.748282620  | 4.429714429   |
| H228 | -6.891191186  | 5.246393931  | 5.333067558   |
| H229 | -8.930220561  | 5.449264798  | 3.460392842   |
| H230 | -6.265828599  | 6.837509511  | 2.769750804   |
| H231 | -10.839903099 | 9.537752627  | 1.105435628   |
| H232 | -3.264054699  | 4.258092965  | 1.293777951   |
| H233 | -4.814317391  | 3.974396570  | 0.490528836   |
| H234 | -9.825024013  | 10.460830030 | 3.259843697   |
| H235 | -8.376703810  | 5.643963976  | 1.796059603   |
| H236 | -6.178256334  | 2.027820240  | 1.369609023   |
| H237 | -7.013787323  | -0.564232140 | 3.495611832   |
| H238 | -9.852787877  | 1.940951076  | -0.227286385  |
| H239 | -2.160569974  | 1.544115631  | -2.685443314  |
| H240 | -10.208750570 | 0.204822877  | -0.161902737  |
| H241 | 10.289605208  | 3.228139721  | 2.649115985   |
| H242 | 8.680858810   | 3.324240218  | 2.383821917   |
| H243 | 1.554720985   | 5.974995206  | -1.452283723  |
| H244 | -0.696686440  | 5.477258150  | 0.264283694   |
| H245 | 1.737567906   | 8.067385137  | 0.309937793   |
| H246 | -3.443557642  | 3.553992857  | -1.609670225  |
| H247 | -5.115484609  | 4.162829037  | -2.791029104  |
| H248 | -6.698164010  | 3.390223620  | -4.187269098  |
| H249 | -4.803898927  | 5.412304953  | -1.851519530  |
| H250 | -5.521838809  | 1.250056928  | -4.085962999  |
| H251 | -7.303027366  | 1.273952639  | -3.888585104  |
| H252 | -0.044843555  | 11.601700947 | -1.854082223  |
| H253 | -1.217334220  | 12.921718064 | -1.679160538  |
| H254 | -0.910965404  | 10.200203681 | -3.341259229  |
| H255 | -2.593448386  | 9.672402914  | -3.327766149  |
| H256 | -3.736645457  | 9.176547376  | -6.059840877  |
| H257 | -2.653915938  | 4.854823736  | -5.754209077  |
| H258 | -7.276109711  | 8.691710758  | -0.559407398  |
| H259 | -3.101015576  | 8.555519834  | 2.137801041   |
| H260 | -4.683700821  | 7.784409759  | -2.959070786  |
| H261 | 1.064278474   | 5.377117548  | -3.900559238  |
| H262 | 2.346098261   | 7.198293470  | -3.259997850  |
| H263 | -1.394617535  | 4.883902018  | -3.358615273  |
| H264 | -8.362744331  | -0.205977690 | -1.491029466  |
| H265 | 3.644558374   | 10.006270664 | -4.156499215  |
| H266 | -6.097226724  | -0.957471406 | -3.078135335  |
| H267 | 0.533058895   | 6.359424706  | -5.262276493  |
| H268 | -3.398602033  | 6.975103220  | 0.275019671   |
| H269 | 3.344324882   | 10.308302968 | -2.431419899  |
| H270 | -3.017262964  | 7.738439783  | -6.695019530  |
| H271 | -5.110941667  | 8.945744178  | -4.171826302  |

|      |              |               |               |
|------|--------------|---------------|---------------|
| H272 | -5.186233925 | -3.526959287  | -3.444316176  |
| H273 | -5.778805669 | -3.338393760  | -0.799270805  |
| H274 | -6.921930067 | 10.360386837  | 1.237750201   |
| H275 | -5.242787382 | 1.382153667   | -1.615868640  |
| H276 | -0.487235922 | 8.021522955   | -3.710822391  |
| H277 | -1.742732816 | 6.348900749   | -6.000631735  |
| H278 | -0.683477568 | 4.203518868   | -4.815629340  |
| H279 | -3.599893399 | 5.876051436   | -3.674252801  |
| H280 | 0.797648048  | 8.909215081   | 2.941956329   |
| H281 | -0.460557719 | 9.754443356   | 0.106540620   |
| H282 | -0.080912594 | 12.619104557  | 0.392439497   |
| H283 | 2.271633924  | 9.429738106   | 2.089299442   |
| H284 | -2.437402394 | 10.650825735  | 1.741095836   |
| H285 | 4.608519805  | -3.037202066  | -9.159638304  |
| H286 | 4.581811245  | -4.490814325  | -8.141788107  |
| H287 | 7.910579459  | -5.210590695  | -5.118054692  |
| H288 | 5.043913598  | -5.117761384  | -10.403756766 |
| H289 | 3.505772461  | -5.596853276  | -10.111034812 |
| H290 | 5.499890077  | 4.767841183   | -0.962699131  |
| H291 | 5.712601530  | 7.423409120   | 0.517086355   |
| H292 | 4.829577289  | 8.091126285   | -3.607934546  |
| H293 | 4.097442561  | 5.585027802   | -0.209002871  |
| H294 | 6.811562440  | 8.024887665   | -0.535280901  |
| H295 | 5.398180377  | 2.808404483   | -6.787401832  |
| H296 | 5.981008150  | 6.756370289   | -2.327020623  |
| H297 | 5.320458297  | -7.027221842  | 4.986957381   |
| H298 | 7.066524138  | -7.900438692  | 2.620153120   |
| H299 | 3.624478565  | 1.380456143   | -6.812037057  |
| H300 | 5.090704286  | -0.137633331  | 3.205269378   |
| H301 | 0.557111963  | 1.560255981   | -8.685208213  |
| H302 | -1.115166356 | -2.149923740  | -4.385296193  |
| H303 | 0.456350403  | 2.073671452   | -6.996563139  |
| H304 | 4.257362215  | -4.521969083  | 4.480117201   |
| H305 | 2.111634387  | 0.041412793   | -6.603153127  |
| H306 | 3.941463706  | -5.123059506  | 2.847431080   |
| H307 | 4.786363277  | -7.320794250  | 3.314847154   |
| H308 | 6.438715076  | -5.498688694  | 2.565829068   |
| H309 | 6.664882063  | -5.074482863  | 4.270528963   |
| H310 | -5.189182338 | -0.802873837  | -6.417696533  |
| H311 | 5.938154488  | -9.481885803  | 4.894131098   |
| H312 | 4.987795158  | -11.789156204 | 3.122159673   |
| H313 | 0.225698119  | -0.046267167  | -4.170300444  |
| H314 | 6.297910409  | -11.842603329 | 5.730633807   |
| H315 | 4.738893170  | -12.156411701 | 5.340546555   |
| H316 | 5.515290164  | -3.367120714  | 2.018001908   |
| H317 | -0.731197464 | 2.107315747   | -4.883479109  |
| H318 | -3.353304947 | -2.077730945  | -5.456586769  |
| H319 | 7.647577192  | -9.931521669  | -1.672380869  |
| H320 | 6.650127944  | -7.649952458  | -3.741746787  |
| H321 | 6.632794090  | -8.167794056  | -0.107781243  |
| H322 | 6.789524387  | -10.535793216 | -2.819850617  |
| H323 | 4.918816191  | 2.555319112   | -9.528500783  |
| H324 | 6.333693439  | -5.035196770  | -0.203926549  |
| H325 | 2.296835800  | -7.744739535  | 0.825215144   |
| H326 | 3.278247854  | -2.005660871  | -7.642946515  |
| H327 | 3.095327427  | -9.199407978  | -0.821761352  |
| H328 | 3.143750504  | -7.050478741  | -7.063837334  |
| H329 | 2.262385045  | -5.556067282  | -5.212304099  |
| H330 | 6.590572779  | -12.438909877 | 3.485752540   |
| H331 | 5.743352392  | -1.107942469  | 1.933071645   |
| H332 | 8.347527814  | -5.800658971  | 0.809354846   |
| H333 | 7.219313510  | -3.766987230  | -0.094650877  |
| H334 | 8.972624772  | -6.857653671  | 2.793473448   |
| H335 | 3.662200654  | -2.731175336  | 5.098411213   |
| H336 | 3.773888418  | -8.292670857  | -3.668079963  |
| H337 | 4.993866261  | -8.596471689  | -2.426711293  |
| H338 | 1.936471389  | -8.711455429  | -2.068715755  |
| H339 | 1.338830592  | -2.150544216  | -6.167496295  |
| H340 | -2.981214485 | 2.188149992   | -5.987045175  |
| H341 | -5.124227490 | 0.973121644   | -6.569205127  |
| H342 | 2.319455776  | -5.983120067  | 0.608250682   |
| H343 | 8.507234339  | -7.332412537  | 0.583127043   |
| H344 | 7.404856878  | -9.254500465  | 0.672538615   |
| H345 | 4.162297122  | -1.079272845  | 5.086353613   |
| H346 | 5.608178636  | -7.678418085  | -6.704805439  |
| H347 | 6.547190410  | -5.999476291  | -3.152307207  |
| H348 | 0.458753705  | -2.943826571  | -7.506522119  |
| H349 | 4.272965423  | 4.166442150   | -7.012607305  |
| H350 | 7.772979909  | 0.153555387   | 3.940337968   |
| H351 | 7.790156699  | 0.565199573   | 2.211383512   |

|       |              |               |               |
|-------|--------------|---------------|---------------|
| H352  | 9.019264571  | -6.811010231  | -6.433879616  |
| H353  | 8.282343211  | -8.074543460  | -5.698204950  |
| H354  | 10.311681249 | -8.545184921  | -1.647147944  |
| H355  | 8.582559991  | -8.237112608  | -3.100172738  |
| H356  | 11.714309115 | -7.558985290  | -3.809397337  |
| H357  | 10.183388873 | -6.820838696  | -1.249551900  |
| H358  | 10.543906627 | 0.328069403   | 2.167584093   |
| H359  | -2.977184752 | 13.209232252  | 3.720638185   |
| H360  | 10.231221607 | -6.866355099  | 5.526833601   |
| H361  | 9.535200423  | -4.448688693  | 4.402215776   |
| H362  | -4.704682377 | 12.319406572  | 1.404014478   |
| H363  | -4.091411133 | 10.304629797  | 3.653731899   |
| H364  | -5.680242122 | 11.002922574  | 3.292074118   |
| H365  | 1.181113621  | -3.315083630  | -1.235543946  |
| H366  | 3.645217530  | -1.153939468  | 0.217167743   |
| H367  | -6.449037136 | 6.817618206   | -1.568597940  |
| H368  | 0.156937072  | -1.245939832  | -0.298275275  |
| H369  | -1.899642153 | -0.182099534  | -0.863552967  |
| Mo370 | 3.822030277  | -4.412227342  | -2.497038305  |
| N371  | -7.004623435 | -7.185141125  | -0.321954830  |
| N372  | -8.801693594 | -4.646593258  | 1.760926613   |
| N373  | -8.161696356 | -4.947093561  | 4.482307925   |
| N374  | -5.476425204 | -5.793710768  | 4.486208942   |
| N375  | -4.233997908 | -3.393573819  | 3.638497991   |
| N376  | -4.905845097 | -1.769534659  | 5.910676601   |
| N377  | -3.664836120 | -3.113176347  | 8.140075864   |
| N378  | -1.105679325 | -4.437767416  | 7.537769944   |
| N379  | 0.226417346  | -2.527152326  | 6.144769406   |
| N380  | -0.384308182 | 0.391126858   | 6.801489330   |
| N381  | -0.674099684 | 0.209201143   | 9.672479311   |
| N382  | 5.521485250  | -11.531133276 | 5.142625681   |
| N383  | 6.397410550  | -9.275846363  | 4.000901877   |
| N384  | 5.021905657  | -3.337854817  | 2.914976924   |
| N385  | 4.273913414  | -2.011448503  | 4.698030579   |
| N386  | 5.403182055  | -1.056337140  | 2.904194671   |
| N387  | 9.048617045  | -6.972128757  | 3.828687881   |
| N388  | -5.869841225 | -2.951025211  | -2.918221600  |
| N389  | -1.945995558 | -5.583365063  | -3.202480040  |
| N390  | -6.084769616 | -0.447098480  | -2.178700390  |
| N391  | -8.346844320 | 0.662780331   | -0.961109012  |
| N392  | -7.845977816 | 0.355254944   | 1.787156567   |
| N393  | -5.694781676 | 2.093671918   | 2.270028664   |
| N394  | -3.112731746 | 2.694399544   | -1.099961825  |
| N395  | -2.406214602 | 0.695068951   | -0.715892096  |
| N396  | -6.326069877 | 4.730411128   | 2.873817191   |
| N397  | -9.757877231 | 7.736816554   | 1.592291919   |
| N398  | -9.661242635 | 9.521473015   | 2.907287516   |
| N399  | 9.470622651  | 2.672928562   | 2.389458599   |
| N400  | 6.278941578  | 7.181990929   | -0.302755539  |
| N401  | 4.213004538  | 8.454145374   | -2.885791754  |
| N402  | 1.556295429  | 7.844837616   | -3.358854873  |
| N403  | -3.174931992 | 6.404471785   | -4.457799752  |
| N404  | -3.365922545 | 8.246762390   | -5.889633784  |
| N405  | -4.454392447 | 8.242187597   | -3.844719210  |
| N406  | 0.663751371  | 6.332795689   | -1.077039936  |
| N407  | 0.975954686  | 8.221144876   | 0.977144212   |
| N408  | -0.367360301 | 10.606571822  | 0.658740716   |
| N409  | -1.885794888 | 10.350478966  | -3.052326147  |
| N410  | -2.747218344 | 11.618924993  | 1.708177852   |
| N411  | 4.096051207  | -4.770134132  | -10.241167160 |
| N412  | 2.462346834  | -2.573201552  | -7.885379004  |
| N413  | 1.412692909  | 0.228583276   | -7.343623507  |
| N414  | 3.491204063  | 2.227834639   | -7.372558848  |
| N415  | -1.723962375 | -2.999470503  | -10.085502224 |
| N416  | -3.290834354 | -1.180256838  | -8.509865766  |
| N417  | 8.149061072  | -7.097222846  | -5.976388711  |
| N418  | 4.256571886  | -5.715578990  | -4.404310366  |
| N419  | 3.715776072  | -6.708799881  | -6.295951755  |
| N420  | 9.244015450  | -7.457259521  | -3.052367920  |
| N421  | 0.187919764  | 2.169026722   | 0.192074862   |
| N422  | 2.792518785  | -0.513285989  | 0.516397472   |
| N423  | 1.025961113  | 1.592223457   | -0.292982061  |
| N424  | 2.434935092  | -0.517520643  | 1.643265193   |
| O425  | -6.579309642 | -5.127426983  | 1.653159263   |
| O426  | -7.303513918 | -2.833636225  | 4.504205024   |
| O427  | -5.325247792 | -5.212033083  | 6.688610307   |
| O428  | -2.466183215 | -4.005763972  | 4.939520516   |
| O429  | -3.069339653 | -0.528876077  | 5.419595368   |
| O430  | -3.277843738 | -1.021534378  | 8.988804394   |
| O431  | -0.544973388 | -4.035834269  | 9.722615367   |

|      |              |               |              |
|------|--------------|---------------|--------------|
| O432 | 2.179496851  | -3.747923647  | 6.061516273  |
| O433 | 1.895820714  | 0.289310734   | 6.665844704  |
| O434 | 0.837097156  | 1.903267181   | 9.726040273  |
| O435 | 1.536696954  | -0.290970046  | 12.456763213 |
| O436 | 7.058404151  | -10.337144726 | 2.055972886  |
| O437 | 8.042438795  | -7.705921441  | 5.762194791  |
| O438 | 11.568202047 | -4.515928725  | 4.541797306  |
| O439 | -5.631237384 | -0.844082578  | 0.034496669  |
| O440 | -3.709248933 | -4.399772946  | -4.016280228 |
| O441 | -7.114931153 | 2.506142662   | -0.411918286 |
| O442 | -6.331912675 | 3.043775433   | -3.354057497 |
| O443 | -9.770757807 | 1.505288326   | 2.278273431  |
| O444 | -5.637717963 | 1.491589183   | 4.473606605  |
| O445 | -4.249753893 | 5.052892075   | 3.768715997  |
| O446 | -6.565949021 | 7.261813238   | 5.339472915  |
| O447 | 10.789296010 | -0.067154871  | 4.155860831  |
| O448 | 3.578154199  | 4.712638643   | 3.947977348  |
| O449 | 3.602216522  | 8.368673269   | -0.691879999 |
| O450 | 0.990085233  | 10.068827497  | -3.528969640 |
| O451 | -1.402278745 | 7.193805510   | -1.537051904 |
| O452 | -0.692981040 | 7.168525238   | 2.150410462  |
| O453 | 2.445161592  | 5.699908804   | 1.437559034  |
| O454 | 0.855924164  | 11.607382370  | 2.317260954  |
| O455 | -2.502996555 | 13.583678481  | 0.577492279  |
| O456 | -3.258440359 | 11.010638992  | -1.347588611 |
| O457 | -4.953628392 | 13.710620450  | 3.620296552  |
| O458 | -5.503752911 | 6.843991619   | -1.323723848 |
| O459 | 1.754975972  | -4.576379136  | -8.757822230 |
| O460 | -0.275256683 | -0.743103802  | -8.553715584 |
| O461 | 2.121287047  | 3.603122923   | -8.554321047 |
| O462 | 5.815405677  | 4.346491294   | -9.137764281 |
| O463 | -5.007321911 | -2.635186633  | -8.876355508 |
| O464 | -1.485235086 | -6.595854457  | -6.017387915 |
| O465 | 0.446700645  | -5.783924934  | -6.784598341 |
| O466 | -4.001177637 | 2.320293228   | -8.447846849 |
| O467 | 9.938884492  | -5.398785979  | -3.699809502 |
| O468 | 12.673554684 | -6.984812657  | -2.101289833 |
| O469 | 0.300181426  | -6.289822590  | -1.362282089 |
| O470 | -0.249342570 | -7.365085868  | 0.534526337  |
| O471 | 5.160661828  | -10.901794049 | -3.342030229 |
| O472 | 2.899956109  | -10.950334789 | -3.319629477 |
| O473 | 5.076902886  | -5.807714042  | -1.332706593 |
| O474 | 5.030167825  | -7.499571971  | 0.146886301  |
| O475 | 2.614103254  | -6.122020858  | -2.117654182 |
| O476 | 8.944207625  | -6.556313364  | 1.033225964  |
| O477 | 6.953437691  | -4.559866108  | 0.409396646  |
| O478 | -4.385315932 | 4.749725561   | -2.455116111 |
| O479 | 7.740644461  | -10.423552733 | -2.518393322 |
| O480 | 7.511538319  | -8.633372984  | -0.092183345 |
| S481 | 3.610408146  | 4.957772599   | -2.509930338 |
| S482 | 1.954720729  | 1.834999963   | -3.146396789 |
| S483 | 2.064655559  | -3.392489068  | -3.750699467 |
| S484 | 4.005943002  | 1.942733141   | -0.315517100 |
| S485 | 0.514969663  | -0.935833807  | -1.583062557 |
| S486 | 3.989174197  | -0.686566062  | -5.574204255 |
| S487 | 3.380810537  | -3.492136329  | -0.327688518 |
| S488 | 5.616981550  | 1.635658437   | -3.403721312 |
| S489 | 5.664400653  | -3.074807595  | -3.150879540 |
| S490 | 6.335270611  | -0.910841898  | -0.410126151 |
| end  |              |               |              |

## Fe6-N-N to Fe6-NH-NH-a

Figure 8, scheme G

| reactant <b>Fe6-N-N</b> (S=1/2) | bm526hx7hn6n2n147.car_2 |              |              |             |
|---------------------------------|-------------------------|--------------|--------------|-------------|
| Fe( 139) 1.257                  | C1                      | -7.736529657 | -5.357530967 | 1.287924563 |
| Fe( 140) -1.290                 | C2                      | -8.081696689 | -6.516056852 | 0.345073833 |
| Fe( 141) 1.973                  | C3                      | -8.625326579 | -3.464947002 | 2.578483484 |
| Fe( 142) -2.250                 | C4                      | -7.988138163 | -3.730401790 | 3.940393160 |
| Fe( 143) 2.638                  | C5                      | -7.570522466 | -5.332511304 | 5.742366667 |
| Fe( 144) -1.640                 | C6                      | -6.044454485 | -5.446756387 | 5.682626648 |
| Fe( 145) -0.237                 | C7                      | -4.063162449 | -5.764498047 | 4.294286300 |
|                                 | C8                      | -3.516980243 | -4.334822411 | 4.329767962 |
|                                 | C9                      | -3.911450411 | -1.997714912 | 3.694200158 |
|                                 | C10                     | -3.918115494 | -1.389699254 | 5.104845734 |
|                                 | C11                     | -4.952270573 | -1.237142312 | 7.278960474 |
|                                 | C12                     | -3.876964296 | -1.806418311 | 8.216896463 |

|     |               |               |              |
|-----|---------------|---------------|--------------|
| C13 | -2.872764459  | -3.837746638  | 9.155769846  |
| C14 | -1.397442140  | -4.106933968  | 8.826917204  |
| C15 | 0.258828856   | -4.719633287  | 7.107499432  |
| C16 | 0.989174280   | -3.584332516  | 6.383984374  |
| C17 | 0.670953779   | -1.316257601  | 5.410925155  |
| C18 | 0.785691137   | -0.101447217  | 6.345307800  |
| C19 | -0.212550177  | -1.099266975  | 4.160487275  |
| C20 | 0.087848248   | 0.239779546   | 3.475832509  |
| C21 | -0.084080703  | -2.295420879  | 3.209223605  |
| C22 | -0.387786766  | 1.610881013   | 7.658220835  |
| C23 | -0.033523101  | 1.262676325   | 9.115033957  |
| C24 | -1.725336075  | 2.375500492   | 7.519948432  |
| C25 | -1.806077324  | 3.538993780   | 8.513796917  |
| C26 | -1.906460198  | 2.886062161   | 6.083912551  |
| C27 | -0.438617231  | -0.117634691  | 11.064269959 |
| C28 | 1.025346124   | -0.397056886  | 11.340988422 |
| C29 | 5.889131066   | -11.622457201 | 3.704831299  |
| C30 | 6.519742048   | -10.340945307 | 3.171010080  |
| C31 | 6.811436079   | -7.926594019  | 3.687970781  |
| C32 | 8.040113667   | -7.542337646  | 4.531690097  |
| C33 | 5.641220737   | -6.961763876  | 3.938985638  |
| C34 | 5.983749619   | -5.521826086  | 3.568384702  |
| C35 | 4.748582227   | -4.626525073  | 3.535387132  |
| C36 | 4.877119114   | -2.119648462  | 3.473725664  |
| C37 | 10.282906024  | -6.553605398  | 4.468786855  |
| C38 | 10.467336425  | -5.052933590  | 4.466971311  |
| C39 | -5.335701990  | -2.672908771  | -1.589009254 |
| C40 | -5.701038508  | -1.239040985  | -1.158539722 |
| C41 | -3.797841753  | -2.815961968  | -1.521079965 |
| C42 | -3.240784629  | -4.250424144  | -1.628548950 |
| C43 | -2.970709835  | -4.745903301  | -3.049797172 |
| C44 | -6.178119255  | 1.001642818   | -2.065695776 |
| C45 | -7.261670205  | 1.467171166   | -1.082609717 |
| C46 | -6.350449786  | 1.612531918   | -3.462024532 |
| C47 | -9.416768782  | 0.964753988   | -0.029896593 |
| C48 | -9.014165129  | 0.973188562   | 1.447884153  |
| C49 | -7.308118646  | 0.429973432   | 3.120772325  |
| C50 | -6.125745756  | 1.375644099   | 3.336920355  |
| C51 | -4.603699423  | 3.061455381   | 2.429929859  |
| C52 | -5.039212236  | 4.367856950   | 3.132767928  |
| C53 | -4.010900559  | 3.503043792   | 1.083025196  |
| C54 | -3.416527050  | 2.434396792   | 0.230063573  |
| C55 | -3.037310322  | 1.136393105   | 0.460285514  |
| C56 | -2.603817148  | 1.598909695   | -1.677788055 |
| C57 | -6.839342309  | 6.045714236   | 3.259154758  |
| C58 | -6.728252098  | 6.212538311   | 4.773558440  |
| C59 | -8.320000513  | 6.102513780   | 2.813460613  |
| C60 | -8.934334653  | 7.465940184   | 2.686847965  |
| C61 | -8.872059666  | 8.568333768   | 3.516979719  |
| C62 | -10.163053665 | 8.993244943   | 1.767050373  |
| C63 | 9.250863037   | 1.657696144   | 3.407544706  |
| C64 | 10.297184607  | 0.571833439   | 3.236769293  |
| C65 | 7.865338334   | 0.995453510   | 3.209237436  |
| C66 | 6.721667485   | 1.959361255   | 3.418156006  |
| C67 | 6.142226943   | 2.143599808   | 4.685746959  |
| C68 | 6.209709371   | 2.711877753   | 2.345673903  |
| C69 | 5.089989279   | 3.045837804   | 4.881790818  |
| C70 | 5.173374121   | 3.628467537   | 2.527972698  |
| C71 | 4.609750962   | 3.789991112   | 3.796217301  |
| C72 | 5.385808824   | 6.863915523   | -1.403603184 |
| C73 | 4.325122349   | 7.960025537   | -1.607470315 |
| C74 | 4.719911015   | 5.528322351   | -1.077717083 |
| C75 | 3.313136854   | 9.548644658   | -3.206824845 |
| C76 | 1.838900044   | 9.170955840   | -3.377237909 |
| C77 | 0.216862387   | 7.275999659   | -3.338552009 |
| C78 | -0.249714350  | 6.927545326   | -1.901234153 |
| C79 | 0.248340008   | 6.033499250   | -4.256712090 |
| C80 | -1.003151060  | 5.153651543   | -4.361273062 |
| C81 | -2.151596501  | 5.688371043   | -5.233452650 |
| C82 | -3.678413560  | 7.603318288   | -4.754351228 |
| C83 | 0.270716743   | 5.959862236   | 0.285201934  |
| C84 | 0.110307745   | 7.172152040   | 1.214026817  |
| C85 | 1.272797046   | 4.990029645   | 0.945797596  |
| C86 | 1.183755430   | 9.237036200   | 1.969743546  |
| C87 | 0.546459361   | 10.587332000  | 1.674026663  |
| C88 | -0.849017497  | 11.880555767  | 0.147144552  |
| C89 | -2.126150234  | 12.434643394  | 0.822206217  |
| C90 | -0.992349649  | 11.895826079  | -1.377332773 |
| C91 | -2.144080721  | 11.046842553  | -1.901833622 |
| C92 | -4.073450764  | 11.954194049  | 2.228157735  |

|       |              |               |              |
|-------|--------------|---------------|--------------|
| C93   | -3.990944170 | 13.060814398  | 3.271643997  |
| C94   | -4.733434543 | 10.689189706  | 2.842959272  |
| C95   | -4.972476763 | 9.615550291   | 1.806446619  |
| C96   | -6.145354805 | 9.622244879   | 1.036590751  |
| C97   | -4.012478531 | 8.625732641   | 1.541805274  |
| C98   | -6.346960030 | 8.687508523   | 0.019960524  |
| C99   | -4.185399576 | 7.696506023   | 0.511153186  |
| C100  | -5.353211319 | 7.744780444   | -0.244249483 |
| C101  | 4.087656132  | -3.992202654  | -8.988489994 |
| C102  | 2.662754243  | -3.737912617  | -8.530118232 |
| C103  | 1.213551941  | -2.199158721  | -7.223836877 |
| C104  | 0.715105595  | -0.846637737  | -7.746758697 |
| C105  | 1.130726490  | 1.576777997   | -7.708480066 |
| C106  | 2.316373567  | 2.514833800   | -7.921423257 |
| C107  | 4.601851814  | 3.167366879   | -7.435657606 |
| C108  | 5.112601324  | 3.392910333   | -8.844358207 |
| C109  | -2.739364565 | -3.496963115  | -9.169320266 |
| C110  | -3.763557078 | -2.401551710  | -8.849649318 |
| C111  | -2.254063695 | -4.163285634  | -7.861859632 |
| C112  | -1.530924492 | -5.491772008  | -8.149351083 |
| C113  | -0.864888039 | -6.016524884  | -6.897423164 |
| C114  | -4.166673790 | -0.084582025  | -8.194623061 |
| C115  | -3.680661116 | 1.201510523   | -8.832829331 |
| C116  | -4.568550431 | 0.047014487   | -6.703712488 |
| C117  | -3.344207056 | 0.071366160   | -5.834323783 |
| C118  | -2.628739034 | 1.264621990   | -5.634834520 |
| C119  | -2.805739280 | -1.133904823  | -5.355097925 |
| C120  | -1.360490486 | 1.231911956   | -5.045534590 |
| C121  | -1.539765011 | -1.165420319  | -4.764057694 |
| C122  | -0.800679575 | 0.015720550   | -4.642935039 |
| C123  | 7.925562595  | -6.271061109  | -4.814554932 |
| C124  | 9.110190720  | -6.343086721  | -3.837164070 |
| C125  | 6.616064006  | -6.580783346  | -4.075959609 |
| C126  | 5.346908465  | -6.352511995  | -4.831899743 |
| C127  | 4.953469900  | -6.930696526  | -6.021578090 |
| C128  | 3.251019991  | -5.805560837  | -5.161849187 |
| C129  | 10.312472328 | -7.537300143  | -2.108099673 |
| C130  | 11.671105806 | -7.326015417  | -2.739342143 |
| C131  | 0.630353692  | -6.901355347  | -0.179216779 |
| C132  | 2.124046354  | -6.958299490  | 0.133903950  |
| C133  | 3.034266253  | -7.084390104  | -1.123104091 |
| C134  | 2.928713602  | -8.520004410  | -1.705408052 |
| C135  | 3.965829537  | -8.866851603  | -2.776979200 |
| C136  | 3.992473149  | -10.359590622 | -3.170734638 |
| C137  | 4.502483987  | -6.847879049  | -0.728488283 |
| C138  | 3.584332355  | -0.690575566  | -2.228495610 |
| Fe139 | 3.814225626  | -1.979617785  | -3.599718328 |
| Fe140 | 2.136667520  | 0.706333287   | -1.580572694 |
| Fe141 | 5.057199197  | 0.420859746   | -1.584024924 |
| Fe142 | 3.774613993  | 0.508842752   | -3.765279954 |
| Fe143 | 3.720276806  | 2.723072027   | -2.380214157 |
| Fe144 | 4.846378337  | -2.073731431  | -1.245366539 |
| Fe145 | 2.201704189  | -2.395131284  | -1.190575080 |
| H146  | -6.289011426 | -7.492080653  | 0.380338348  |
| H147  | -6.466179081 | -6.505578407  | -0.908272076 |
| H148  | -9.726653098 | -4.836019693  | 1.364430638  |
| H149  | -8.795909913 | -6.154989418  | -0.412700097 |
| H150  | -8.630449501 | -7.259734726  | 0.948586143  |
| H151  | -7.986544958 | -2.724969447  | 2.074161096  |
| H152  | -8.749474110 | -5.632178583  | 3.967865963  |
| H153  | -9.609301322 | -3.004693101  | 2.741761524  |
| H154  | -7.987421326 | -6.296851937  | 6.060700144  |
| H155  | -6.100529909 | -5.872910786  | 3.665103491  |
| H156  | -7.798186071 | -4.590437523  | 6.518604744  |
| H157  | -2.909601987 | -1.829250596  | 3.278963981  |
| H158  | -5.074034046 | -3.709097572  | 3.136457047  |
| H159  | -3.829384519 | -6.224977263  | 3.324930703  |
| H160  | -4.803638673 | -0.149681053  | 7.247663523  |
| H161  | -5.699890176 | -2.326683300  | 5.569792667  |
| H162  | -3.552715828 | -6.331924199  | 5.081366117  |
| H163  | -4.636418600 | -1.464401994  | 3.063514933  |
| H164  | -4.263992837 | -3.712835466  | 7.533595109  |
| H165  | -5.940096264 | -1.445824860  | 7.713197238  |
| H166  | -0.457775149 | -3.217526142  | 3.674632964  |
| H167  | -0.669286779 | -2.124312329  | 2.291311151  |
| H168  | 0.959398501  | -2.457692564  | 2.906155055  |
| H169  | -1.253758640 | -1.053704654  | 4.509617578  |
| H170  | -3.344252488 | -4.809340905  | 9.365357692  |
| H171  | -1.914714352 | 2.069044867   | 5.350107902  |
| H172  | -1.470785266 | -0.246744375  | 9.202299638  |

|      |               |              |               |
|------|---------------|--------------|---------------|
| H173 | -1.768185521  | 3.201607726  | 9.559367175   |
| H174 | 1.110746552   | 0.283511667  | 3.081927890   |
| H175 | -0.056132034  | 1.087793895  | 4.161151349   |
| H176 | 9.311608856   | 2.011668002  | 4.454635220   |
| H177 | -2.860556635  | 3.423687897  | 5.986675314   |
| H178 | -2.749585809  | 4.084740758  | 8.366876252   |
| H179 | -1.094775698  | 3.584116581  | 5.820118669   |
| H180 | -0.975798302  | 4.245476182  | 8.354872499   |
| H181 | -2.543248882  | 1.667106001  | 7.746211500   |
| H182 | 0.433696460   | 2.263762200  | 7.326708104   |
| H183 | -1.275285295  | 0.080150121  | 6.437976513   |
| H184 | -0.601503719  | 0.385955318  | 2.629258222   |
| H185 | 1.571879532   | 4.232272278  | 0.206450522   |
| H186 | 0.741031096   | 4.487278697  | 1.766810742   |
| H187 | 2.668488884   | 5.303159659  | 2.304076690   |
| H188 | 3.225833991   | 4.675763763  | 4.831181430   |
| H189 | 4.781261267   | 4.197772966  | 1.684841276   |
| H190 | 6.614529774   | 2.563533264  | 1.341733096   |
| H191 | 6.508686143   | 1.563783523  | 5.537731958   |
| H192 | -0.740602410  | -2.540322390 | 6.437051531   |
| H193 | 0.250863813   | -5.587111318 | 6.431304699   |
| H194 | 0.849443914   | -4.987304890 | 7.993356902   |
| H195 | -1.836005750  | -4.453491253 | 6.817906367   |
| H196 | -2.874895543  | -3.245648299 | 10.078861673  |
| H197 | 4.639637714   | 3.163895638  | 5.871487505   |
| H198 | 1.697175647   | -1.519776950 | 5.087933479   |
| H199 | -0.782342923  | 0.669709549  | 11.754450961  |
| H200 | -0.994872331  | -1.038799071 | 11.297282090  |
| H201 | 1.618093566   | -0.744168995 | 10.462587807  |
| H202 | 11.163762009  | -7.027846319 | 4.008993388   |
| H203 | -1.731913350  | -5.973706594 | -4.120993059  |
| H204 | 1.272143020   | -6.036571990 | -1.780910415  |
| H205 | -2.266573426  | -6.238107327 | -8.482865922  |
| H206 | -0.789242061  | -5.354693645 | -8.949285520  |
| H207 | -3.107367969  | -4.358069315 | -7.193776189  |
| H208 | -3.025486349  | 1.054831823  | -9.723122788  |
| H209 | -3.328622209  | -4.245166881 | -9.721441982  |
| H210 | -3.352691377  | -2.188990768 | -2.312575792  |
| H211 | -3.942540838  | -4.964871145 | -1.165064194  |
| H212 | -2.253495553  | -1.032550930 | -8.441216609  |
| H213 | -5.097588997  | -0.318693976 | -8.752377660  |
| H214 | -1.014497927  | -2.418211773 | -9.590112035  |
| H215 | -1.293497695  | -5.818804451 | -2.421935608  |
| H216 | -1.592748747  | -3.462857346 | -7.328376839  |
| H217 | -1.189648229  | -3.790187456 | -10.484384531 |
| H218 | -6.743848875  | -3.449870663 | -2.883309234  |
| H219 | -3.479615733  | -2.407765757 | -0.549928034  |
| H220 | 0.830044421   | -5.288193193 | -7.566807311  |
| H221 | -2.314050135  | -4.319651470 | -1.041121199  |
| H222 | -3.835229856  | 2.609977586  | 3.073128634   |
| H223 | -3.090415715  | 0.523466232  | 1.350706546   |
| H224 | -8.116354073  | 0.773803991  | 3.781047654   |
| H225 | -7.258291419  | -0.064878542 | 1.045318196   |
| H226 | -6.933494922  | 4.087032725  | 2.397288054   |
| H227 | -8.343581609  | 8.754051496  | 4.444751671   |
| H228 | -6.876280450  | 5.260576903  | 5.340433331   |
| H229 | -8.920586814  | 5.460924508  | 3.482534282   |
| H230 | -6.259474611  | 6.844525167  | 2.770763596   |
| H231 | -10.821710050 | 9.546247670  | 1.103252620   |
| H232 | -3.236769537  | 4.255508153  | 1.302863925   |
| H233 | -4.795653850  | 4.011363450  | 0.499757884   |
| H234 | -9.822650039  | 10.467378540 | 3.266117216   |
| H235 | -8.378766477  | 5.645234439  | 1.812907179   |
| H236 | -6.184291264  | 2.054022781  | 1.365499046   |
| H237 | -7.011822861  | -0.567469800 | 3.477580057   |
| H238 | -9.849265294  | 1.954465025  | -0.233552233  |
| H239 | -2.274467480  | 1.492876218  | -2.709327933  |
| H240 | -10.211040677 | 0.219598232  | -0.167564446  |
| H241 | 10.293350225  | 3.260759371  | 2.672158151   |
| H242 | 8.685812417   | 3.339410095  | 2.386655769   |
| H243 | 1.553108269   | 5.967425914  | -1.449777004  |
| H244 | -0.712177141  | 5.467180046  | 0.253619631   |
| H245 | 1.723072540   | 8.054596507  | 0.302990540   |
| H246 | -3.437340350  | 3.558924746  | -1.613610930  |
| H247 | -5.109161049  | 4.168383605  | -2.792334541  |
| H248 | -6.689400122  | 3.401043328  | -4.193985861  |
| H249 | -4.797711928  | 5.418589553  | -1.853241287  |
| H250 | -5.525455973  | 1.252652159  | -4.098837894  |
| H251 | -7.306433708  | 1.286989702  | -3.899974168  |
| H252 | -0.037348623  | 11.612142916 | -1.841487523  |

|      |              |               |               |
|------|--------------|---------------|---------------|
| H253 | -1.205790765 | 12.935682479  | -1.670454707  |
| H254 | -0.902632182 | 10.215159849  | -3.339987705  |
| H255 | -2.587280127 | 9.699255462   | -3.336283872  |
| H256 | -3.748191866 | 9.169187499   | -6.073923902  |
| H257 | -2.648626224 | 4.854429365   | -5.752344779  |
| H258 | -7.270549649 | 8.697753826   | -0.564624856  |
| H259 | -3.105000289 | 8.556860836   | 2.147038110   |
| H260 | -4.666333990 | 7.792673692   | -2.956204852  |
| H261 | 1.072116838  | 5.390679723   | -3.906710238  |
| H262 | 2.344944298  | 7.203333473   | -3.226880142  |
| H263 | -1.384162521 | 4.886811888   | -3.363090061  |
| H264 | -8.368552549 | -0.197745921  | -1.499992678  |
| H265 | 3.649682321  | 10.018017265  | -4.140999745  |
| H266 | -6.094090708 | -0.952091404  | -3.091970558  |
| H267 | 0.536165136  | 6.374671680   | -5.264497799  |
| H268 | -3.398280392 | 6.976565856   | 0.283416130   |
| H269 | 3.341407928  | 10.312200229  | -2.415982113  |
| H270 | -3.035191415 | 7.727000621   | -6.706029293  |
| H271 | -5.107727284 | 8.947385921   | -4.170788916  |
| H272 | -5.174379979 | -3.529466425  | -3.454190307  |
| H273 | -5.767855983 | -3.332561320  | -0.813672001  |
| H274 | -6.920508935 | 10.366560618  | 1.233275914   |
| H275 | -5.246317813 | 1.387499750   | -1.628887027  |
| H276 | -0.483346777 | 8.031935266   | -3.707860488  |
| H277 | -1.740705508 | 6.349162133   | -6.006987695  |
| H278 | -0.671161299 | 4.213092117   | -4.822280405  |
| H279 | -3.589084980 | 5.882109187   | -3.673108911  |
| H280 | 0.789979125  | 8.891385040   | 2.937282145   |
| H281 | -0.467716044 | 9.761334215   | 0.101830759   |
| H282 | -0.079121849 | 12.622662301  | 0.409202657   |
| H283 | 2.262046247  | 9.412542359   | 2.082176339   |
| H284 | -2.443395381 | 10.654820049  | 1.741668808   |
| H285 | 4.604953282  | -3.035407468  | -9.149768334  |
| H286 | 4.590326489  | -4.487412399  | -8.130791313  |
| H287 | 7.905528485  | -5.226092734  | -5.157673967  |
| H288 | 5.044497008  | -5.116803012  | -10.393349077 |
| H289 | 3.508138801  | -5.599582320  | -10.094954411 |
| H290 | 5.503790601  | 4.770562238   | -0.955513148  |
| H291 | 5.762296013  | 7.438592325   | 0.519955530   |
| H292 | 4.826464618  | 8.093217050   | -3.598759580  |
| H293 | 4.146464287  | 5.620839234   | -0.144634273  |
| H294 | 6.824203248  | 8.062219103   | -0.556175156  |
| H295 | 5.439593496  | 2.775331301   | -6.837836544  |
| H296 | 5.975813430  | 6.751062448   | -2.326382728  |
| H297 | 5.337693069  | -7.030704861  | 4.996776713   |
| H298 | 7.071431553  | -7.905937241  | 2.621670853   |
| H299 | 3.646040073  | 1.369320529   | -6.789814922  |
| H300 | 5.024612943  | -0.116394231  | 3.066994197   |
| H301 | 0.566453302  | 1.540082901   | -8.648071586  |
| H302 | -1.119716593 | -2.112138181  | -4.417089695  |
| H303 | 0.480445228  | 2.068378416   | -6.964475398  |
| H304 | 4.337533742  | -4.488169830  | 4.542352008   |
| H305 | 2.117341748  | 0.025174032   | -6.557699704  |
| H306 | 3.960133760  | -5.084989224  | 2.916358885   |
| H307 | 4.796587206  | -7.313360822  | 3.324910534   |
| H308 | 6.447550042  | -5.504837998  | 2.570779292   |
| H309 | 6.715732475  | -5.095097462  | 4.271636103   |
| H310 | -5.212065951 | -0.808527475  | -6.453216560  |
| H311 | 5.938062115  | -9.493666298  | 4.888420628   |
| H312 | 4.987381558  | -11.790843200 | 3.097050866   |
| H313 | 0.201713421  | 0.005385768   | -4.220366190  |
| H314 | 6.279718503  | -11.866464814 | 5.712144078   |
| H315 | 4.719453090  | -12.159795882 | 5.310951494   |
| H316 | 5.586272850  | -3.376443688  | 2.057404014   |
| H317 | -0.786941813 | 2.150461892   | -4.910512052  |
| H318 | -3.369084129 | -2.062530885  | -5.468078742  |
| H319 | 7.650050967  | -9.925937430  | -1.683170465  |
| H320 | 6.626663677  | -7.638173698  | -3.759354272  |
| H321 | 6.644993925  | -8.167720996  | -0.112181496  |
| H322 | 6.781852687  | -10.527270910 | -2.825407224  |
| H323 | 4.906541516  | 2.560063200   | -9.558719386  |
| H324 | 6.408295600  | -5.066441990  | -0.256708098  |
| H325 | 2.311709672  | -7.777334507  | 0.839117235   |
| H326 | 3.285661104  | -2.025797151  | -7.599907996  |
| H327 | 3.045329438  | -9.215960045  | -0.859276331  |
| H328 | 3.030115117  | -6.885229814  | -6.961062691  |
| H329 | 2.244972853  | -5.422011098  | -5.045811347  |
| H330 | 6.587539358  | -12.443200762 | 3.467624503   |
| H331 | 5.811670327  | -1.136156621  | 1.922711344   |
| H332 | 8.370463444  | -5.785567425  | 0.798805950   |



|       |              |               |               |
|-------|--------------|---------------|---------------|
| H333  | 7.266581006  | -3.777807383  | -0.167795132  |
| H334  | 8.976285731  | -6.859437721  | 2.794449728   |
| H335  | 3.619825761  | -2.682512064  | 5.052433586   |
| H336  | 3.758548075  | -8.285278281  | -3.688261634  |
| H337  | 4.973760928  | -8.585949842  | -2.442870431  |
| H338  | 1.911744067  | -8.662690691  | -2.101633764  |
| H339  | 1.357467162  | -2.159017294  | -6.132271777  |
| H340  | -3.052074301 | 2.208421438   | -5.987149870  |
| H341  | -5.161463613 | 0.968882393   | -6.608521159  |
| H342  | 2.358599109  | -6.010881741  | 0.648161489   |
| H343  | 8.518272547  | -7.320745419  | 0.580796891   |
| H344  | 7.431088162  | -9.246567127  | 0.660245625   |
| H345  | 4.098013070  | -1.016789031  | 5.008534356   |
| H346  | 5.491778292  | -7.570966746  | -6.710068541  |
| H347  | 6.585016581  | -5.992929052  | -3.152198920  |
| H348  | 0.464224523  | -2.955827133  | -7.462929515  |
| H349  | 4.303606522  | 4.134060651   | -7.001512735  |
| H350  | 7.785821309  | 0.158178978   | 3.918136979   |
| H351  | 7.826788611  | 0.578308220   | 2.190390676   |
| H352  | 8.979694005  | -6.862911260  | -6.470945373  |
| H353  | 8.225450959  | -8.102761512  | -5.714093928  |
| H354  | 10.306910289 | -8.548067610  | -1.671473788  |
| H355  | 8.575998484  | -8.246697515  | -3.123114837  |
| H356  | 11.722531298 | -7.573808738  | -3.827151572  |
| H357  | 10.172478406 | -6.822892592  | -1.281211138  |
| H358  | 10.566636075 | 0.359216165   | 2.173624726   |
| H359  | -2.981853396 | 13.216514480  | 3.720580252   |
| H360  | 10.240483568 | -6.872664246  | 5.525071264   |
| H361  | 9.524161188  | -4.458758084  | 4.393431154   |
| H362  | -4.708710105 | 12.323528050  | 1.405694080   |
| H363  | -4.095405007 | 10.309860556  | 3.656532161   |
| H364  | -5.684756454 | 11.006332094  | 3.293905174   |
| H365  | 1.178198540  | -3.379972051  | -0.695250401  |
| H366  | 4.637829681  | -1.432523830  | 0.082896736   |
| H367  | -6.442757108 | 6.824357405   | -1.571120264  |
| H368  | -0.046791131 | -0.824045846  | -0.529668273  |
| H369  | -2.153860337 | -0.279601620  | -0.888886884  |
| Mo370 | 3.882250321  | -4.380380025  | -2.342008573  |
| N371  | -6.967169746 | -7.170720674  | -0.314630681  |
| N372  | -8.805451257 | -4.648984090  | 1.753062638   |
| N373  | -8.188188347 | -4.956418564  | 4.480629065   |
| N374  | -5.505496195 | -5.809582218  | 4.492205129   |
| N375  | -4.251713364 | -3.411286603  | 3.658278212   |
| N376  | -4.911151885 | -1.786721311  | 5.934635869   |
| N377  | -3.675857275 | -3.149225088  | 8.153786201   |
| N378  | -1.098799868 | -4.409885728  | 7.528931572   |
| N379  | 0.237739696  | -2.485152896  | 6.159981693   |
| N380  | -0.383885932 | 0.423260984   | 6.803663697   |
| N381  | -0.689200069 | 0.213967894   | 9.674593653   |
| N382  | 5.510273479  | -11.542290915 | 5.121998023   |
| N383  | 6.398497097  | -9.283553957  | 3.996694085   |
| N384  | 5.096718419  | -3.329166425  | 2.954920910   |
| N385  | 4.198025097  | -1.951265213  | 4.623062090   |
| N386  | 5.390113023  | -1.038731226  | 2.848809663   |
| N387  | 9.055828853  | -6.981490492  | 3.828500572   |
| N388  | -5.855898252 | -2.946423155  | -2.933326527  |
| N389  | -1.928173887 | -5.583652803  | -3.192531172  |
| N390  | -6.085315106 | -0.443102476  | -2.191670525  |
| N391  | -8.349350318 | 0.671668374   | -0.971282384  |
| N392  | -7.840588601 | 0.362147197   | 1.773373931   |
| N393  | -5.693643240 | 2.108044958   | 2.263119836   |
| N394  | -3.133399320 | 2.688285392   | -1.105387348  |
| N395  | -2.547481684 | 0.648807203   | -0.736033361  |
| N396  | -6.320538059 | 4.737739417   | 2.882371696   |
| N397  | -9.743810584 | 7.744714384   | 1.596817150   |
| N398  | -9.656236952 | 9.528322169   | 2.913848454   |
| N399  | 9.483126649  | 2.697655187   | 2.402503415   |
| N400  | 6.313002486  | 7.208764744   | -0.313760461  |
| N401  | 4.217734221  | 8.462851172   | -2.873277021  |
| N402  | 1.558778429  | 7.851407295   | -3.348826697  |
| N403  | -3.168307129 | 6.408338445   | -4.459979766  |
| N404  | -3.372455873 | 8.242165858   | -5.900065244  |
| N405  | -4.447875837 | 8.245357131   | -3.847007634  |
| N406  | 0.655005721  | 6.322835388   | -1.080266640  |
| N407  | 0.961591011  | 8.208974708   | 0.970145596   |
| N408  | -0.373149867 | 10.608349138  | 0.661806755   |
| N409  | -1.877452742 | 10.372486205  | -3.054303720  |
| N410  | -2.751115607 | 11.623666993  | 1.712291099   |
| N411  | 4.096241278  | -4.771909176  | -10.227904499 |
| N412  | 2.467880920  | -2.585193290  | -7.857503549  |

|                          |                                  |               |               |
|--------------------------|----------------------------------|---------------|---------------|
| N413                     | 1.423975382                      | 0.214232287   | -7.302860145  |
| N414                     | 3.518150537                      | 2.198220318   | -7.377187939  |
| N415                     | -1.701148124                     | -3.002242280  | -10.082129974 |
| N416                     | -3.266069073                     | -1.180598473  | -8.497681610  |
| N417                     | 8.108622898                      | -7.125873207  | -6.001073618  |
| N418                     | 4.266426091                      | -5.639128913  | -4.313340944  |
| N419                     | 3.637010030                      | -6.571783789  | -6.208167214  |
| N420                     | 9.241615218                      | -7.469614517  | -3.085885559  |
| N421                     | 0.062086803                      | 2.244904072   | -0.146413465  |
| N422                     | 2.206344793                      | -1.523358134  | 0.420028883   |
| N423                     | 0.873855753                      | 1.706147219   | -0.719150224  |
| N424                     | 2.275699985                      | -1.035077505  | 1.431400321   |
| O425                     | -6.576217961                     | -5.099717356  | 1.655971435   |
| O426                     | -7.323909955                     | -2.845388717  | 4.507469661   |
| O427                     | -5.359145168                     | -5.226900861  | 6.695041405   |
| O428                     | -2.480542427                     | -4.039749093  | 4.944331603   |
| O429                     | -3.049563373                     | -0.577574346  | 5.458492500   |
| O430                     | -3.275322328                     | -1.065732383  | 9.014330142   |
| O431                     | -0.553795980                     | -4.086445929  | 9.732128523   |
| O432                     | 2.178586838                      | -3.720842575  | 6.036776127   |
| O433                     | 1.898081412                      | 0.347763299   | 6.661287724   |
| O434                     | 0.816267413                      | 1.912596734   | 9.746272120   |
| O435                     | 1.521777100                      | -0.312484749  | 12.453820320  |
| O436                     | 7.062348055                      | -10.334580015 | 2.047472859   |
| O437                     | 8.058422958                      | -7.730060115  | 5.761064679   |
| O438                     | 11.556210071                     | -4.508368563  | 4.557872549   |
| O439                     | -5.626582535                     | -0.840735759  | 0.020483662   |
| O440                     | -3.697401958                     | -4.412864379  | -4.014740275  |
| O441                     | -7.111420040                     | 2.510907774   | -0.422503208  |
| O442                     | -6.322743834                     | 3.050038317   | -3.362876237  |
| O443                     | -9.760768200                     | 1.515818458   | 2.273218868   |
| O444                     | -5.600954660                     | 1.454380529   | 4.451476786   |
| O445                     | -4.241676098                     | 5.059179525   | 3.772489964   |
| O446                     | -6.548741824                     | 7.275797689   | 5.341394468   |
| O447                     | 10.807857392                     | -0.043470023  | 4.161092853   |
| O448                     | 3.565878504                      | 4.688058156   | 3.917613407   |
| O449                     | 3.614354295                      | 8.379246016   | -0.677077070  |
| O450                     | 0.996319049                      | 10.075496194  | -3.536406478  |
| O451                     | -1.406989297                     | 7.195119431   | -1.540580767  |
| O452                     | -0.700823962                     | 7.152332006   | 2.149190299   |
| O453                     | 2.425599183                      | 5.679959139   | 1.433710089   |
| O454                     | 0.849124861                      | 11.588938395  | 2.333236806   |
| O455                     | -2.503734307                     | 13.591278838  | 0.587399756   |
| O456                     | -3.253836241                     | 11.026463439  | -1.350549694  |
| O457                     | -4.958918466                     | 13.714912877  | 3.623232813   |
| O458                     | -5.498624327                     | 6.846957841   | -1.321432785  |
| O459                     | 1.758346596                      | -4.581821472  | -8.744748694  |
| O460                     | -0.251686509                     | -0.755786603  | -8.531931476  |
| O461                     | 2.139480529                      | 3.575026528   | -8.545310802  |
| O462                     | 5.739201612                      | 4.384791618   | -9.179220190  |
| O463                     | -4.984718183                     | -2.625526763  | -8.890524798  |
| O464                     | -1.473813385                     | -6.602220726  | -6.008401412  |
| O465                     | 0.453680748                      | -5.767350592  | -6.764093741  |
| O466                     | -4.008424675                     | 2.320864056   | -8.465039722  |
| O467                     | 9.944566497                      | -5.420717175  | -3.752844661  |
| O468                     | 12.664311965                     | -6.979882793  | -2.116220144  |
| O469                     | 0.314050898                      | -6.259980075  | -1.309882723  |
| O470                     | -0.226854633                     | -7.361486285  | 0.573978203   |
| O471                     | 5.145265136                      | -10.894375311 | -3.342781205  |
| O472                     | 2.884080064                      | -10.945781984 | -3.324189433  |
| O473                     | 5.143461096                      | -5.910247836  | -1.379454354  |
| O474                     | 5.038531810                      | -7.554883177  | 0.145663589   |
| O475                     | 2.621829804                      | -6.087025088  | -2.061902127  |
| O476                     | 8.954341018                      | -6.546805923  | 1.035807237   |
| O477                     | 6.999173070                      | -4.557758727  | 0.355427301   |
| O478                     | -4.379003432                     | 4.755150728   | -2.456198101  |
| O479                     | 7.735004666                      | -10.417715717 | -2.530264038  |
| O480                     | 7.531518492                      | -8.620544323  | -0.100722666  |
| S481                     | 3.556430449                      | 4.976198633   | -2.403659809  |
| S482                     | 2.038404495                      | 1.924284062   | -3.542110215  |
| S483                     | 2.036076083                      | -3.273327193  | -3.303829196  |
| S484                     | 3.757664041                      | 1.731795399   | -0.357102508  |
| S485                     | 0.507028125                      | -0.985759256  | -1.766544542  |
| S486                     | 3.973968346                      | -0.827196012  | -5.488012823  |
| S487                     | 3.732856150                      | -3.660708055  | -0.152644484  |
| S488                     | 5.538893945                      | 1.774136334   | -3.302013824  |
| S489                     | 5.686393849                      | -3.054017475  | -3.136606059  |
| S490                     | 6.630806300                      | -0.776846969  | -0.736404749  |
| end                      |                                  |               |               |
| transition state (S=1/2) | bm526n2nto6nhnha147tg_1_53252.65 |               |               |

|          |        |     |               |               |              |
|----------|--------|-----|---------------|---------------|--------------|
| Fe( 139) | 2.276  | C1  | -7.726140770  | -5.358961819  | 1.276573806  |
| Fe( 140) | -1.243 | C2  | -8.114035741  | -6.508375230  | 0.337597436  |
| Fe( 141) | 1.405  | C3  | -8.563476471  | -3.443501169  | 2.569803988  |
| Fe( 142) | -2.279 | C4  | -7.933404878  | -3.706005714  | 3.934423556  |
| Fe( 143) | 2.668  | C5  | -7.502409756  | -5.303465811  | 5.736347225  |
| Fe( 144) | -1.860 | C6  | -5.977203747  | -5.423836124  | 5.668583404  |
| Fe( 145) | -0.418 | C7  | -4.004646804  | -5.728710984  | 4.268955515  |
|          |        | C8  | -3.479991546  | -4.290847449  | 4.302065466  |
|          |        | C9  | -3.899757709  | -1.965014472  | 3.630383954  |
|          |        | C10 | -3.912145439  | -1.340223028  | 5.034415066  |
|          |        | C11 | -4.935526933  | -1.180333303  | 7.212888407  |
|          |        | C12 | -3.865944088  | -1.734464251  | 8.165626874  |
|          |        | C13 | -2.862700825  | -3.751137979  | 9.138442429  |
|          |        | C14 | -1.393454159  | -4.058619166  | 8.815060272  |
|          |        | C15 | 0.246748842   | -4.776472508  | 7.122575097  |
|          |        | C16 | 0.987017071   | -3.637754109  | 6.410262000  |
|          |        | C17 | 0.657583089   | -1.388327415  | 5.389269127  |
|          |        | C18 | 0.780475987   | -0.179613650  | 6.332281177  |
|          |        | C19 | -0.244277785  | -1.172126807  | 4.154351494  |
|          |        | C20 | -0.021328335  | 0.190381438   | 3.482295677  |
|          |        | C21 | -0.088179129  | -2.342318822  | 3.173719802  |
|          |        | C22 | -0.364751636  | 1.564285135   | 7.624960537  |
|          |        | C23 | -0.001467762  | 1.235544749   | 9.083438776  |
|          |        | C24 | -1.695073548  | 2.343271266   | 7.489828202  |
|          |        | C25 | -1.763437572  | 3.508985474   | 8.482345521  |
|          |        | C26 | -1.874485826  | 2.856123806   | 6.054200185  |
|          |        | C27 | -0.408489240  | -0.095993477  | 11.063539355 |
|          |        | C28 | 1.055486297   | -0.366970880  | 11.347867772 |
|          |        | C29 | 5.886465780   | -11.602313439 | 3.731643448  |
|          |        | C30 | 6.509548836   | -10.323897171 | 3.183705997  |
|          |        | C31 | 6.793595324   | -7.903940313  | 3.686070544  |
|          |        | C32 | 8.017265657   | -7.513128139  | 4.534299118  |
|          |        | C33 | 5.618299678   | -6.944096486  | 3.930209817  |
|          |        | C34 | 5.959080318   | -5.503790426  | 3.560739187  |
|          |        | C35 | 4.721547256   | -4.612584949  | 3.512256883  |
|          |        | C36 | 4.897760444   | -2.106888429  | 3.493335055  |
|          |        | C37 | 10.271771857  | -6.552765515  | 4.479714406  |
|          |        | C38 | 10.483477767  | -5.055947506  | 4.466485870  |
|          |        | C39 | -5.323660085  | -2.671589851  | -1.570075403 |
|          |        | C40 | -5.688532004  | -1.238016651  | -1.137791159 |
|          |        | C41 | -3.787847348  | -2.819775836  | -1.508295838 |
|          |        | C42 | -3.241001490  | -4.257144360  | -1.624246915 |
|          |        | C43 | -2.975923500  | -4.745838273  | -3.048757069 |
|          |        | C44 | -6.182530595  | 0.999781962   | -2.042091874 |
|          |        | C45 | -7.270377120  | 1.456650123   | -1.059765526 |
|          |        | C46 | -6.356570467  | 1.610518379   | -3.438066067 |
|          |        | C47 | -9.424123271  | 0.939162381   | -0.011138524 |
|          |        | C48 | -9.025343508  | 0.956170100   | 1.467695540  |
|          |        | C49 | -7.319387567  | 0.440093513   | 3.148262285  |
|          |        | C50 | -6.149129575  | 1.402089639   | 3.361074484  |
|          |        | C51 | -4.601883137  | 3.052674742   | 2.435799763  |
|          |        | C52 | -5.044502964  | 4.358699035   | 3.134657115  |
|          |        | C53 | -4.013240102  | 3.492413910   | 1.086334528  |
|          |        | C54 | -3.409381329  | 2.426647488   | 0.234898032  |
|          |        | C55 | -3.016648027  | 1.132543730   | 0.464964541  |
|          |        | C56 | -2.589277045  | 1.596344833   | -1.672482833 |
|          |        | C57 | -6.844051909  | 6.036555584   | 3.242990785  |
|          |        | C58 | -6.748696852  | 6.195396977   | 4.759479922  |
|          |        | C59 | -8.320303574  | 6.093626165   | 2.783238699  |
|          |        | C60 | -8.941512512  | 7.455046668   | 2.665734136  |
|          |        | C61 | -8.872452504  | 8.558213343   | 3.494319618  |
|          |        | C62 | -10.191797446 | 8.975232245   | 1.763560395  |
|          |        | C63 | 9.243729074   | 1.639162254   | 3.427534809  |
|          |        | C64 | 10.279721430  | 0.542677722   | 3.258186968  |
|          |        | C65 | 7.852283981   | 0.987264145   | 3.239066374  |
|          |        | C66 | 6.713642366   | 1.958244031   | 3.448475680  |
|          |        | C67 | 6.139640320   | 2.151392134   | 4.717535612  |
|          |        | C68 | 6.197782973   | 2.705410032   | 2.373756889  |
|          |        | C69 | 5.088241094   | 3.055072357   | 4.912057846  |
|          |        | C70 | 5.162622802   | 3.623235893   | 2.554658606  |
|          |        | C71 | 4.602333670   | 3.791358052   | 3.823658510  |
|          |        | C72 | 5.377482837   | 6.870909145   | -1.392424910 |
|          |        | C73 | 4.319661556   | 7.967393168   | -1.601376011 |
|          |        | C74 | 4.712051343   | 5.530517734   | -1.083132652 |
|          |        | C75 | 3.309542051   | 9.549475277   | -3.205929670 |
|          |        | C76 | 1.835346453   | 9.171673802   | -3.370994466 |
|          |        | C77 | 0.214737826   | 7.277644376   | -3.331426472 |
|          |        | C78 | -0.248466552  | 6.932622452   | -1.892351248 |
|          |        | C79 | 0.244066899   | 6.033042901   | -4.247359918 |
|          |        | C80 | -1.008243452  | 5.153782926   | -4.349653221 |

|       |              |               |              |
|-------|--------------|---------------|--------------|
| C81   | -2.154596408 | 5.685118371   | -5.226759044 |
| C82   | -3.678407813 | 7.603829624   | -4.747110052 |
| C83   | 0.272847372  | 5.974382642   | 0.297614192  |
| C84   | 0.118801596  | 7.192205535   | 1.221168769  |
| C85   | 1.268500772  | 5.001846178   | 0.963194494  |
| C86   | 1.193746552  | 9.259873767   | 1.965935953  |
| C87   | 0.550824253  | 10.605062827  | 1.661983709  |
| C88   | -0.856249804 | 11.880622838  | 0.134207384  |
| C89   | -2.131864416 | 12.433423673  | 0.813951196  |
| C90   | -1.010242182 | 11.890358756  | -1.389175302 |
| C91   | -2.155804872 | 11.025172741  | -1.899335514 |
| C92   | -4.075231213 | 11.950812667  | 2.225526553  |
| C93   | -3.991261749 | 13.053294641  | 3.273168501  |
| C94   | -4.733281601 | 10.683934357  | 2.839020175  |
| C95   | -4.972633963 | 9.610531498   | 1.802238139  |
| C96   | -6.151062801 | 9.610409901   | 1.040655953  |
| C97   | -4.008379940 | 8.626866842   | 1.529666447  |
| C98   | -6.354748991 | 8.674364954   | 0.025476344  |
| C99   | -4.182884345 | 7.697442109   | 0.499508287  |
| C100  | -5.356731516 | 7.738233054   | -0.247001309 |
| C101  | 4.088168463  | -3.982041006  | -8.998045676 |
| C102  | 2.663038861  | -3.730275500  | -8.538652584 |
| C103  | 1.215440354  | -2.193487645  | -7.226884510 |
| C104  | 0.718972720  | -0.839497198  | -7.747607372 |
| C105  | 1.129391127  | 1.584201470   | -7.705914011 |
| C106  | 2.305877165  | 2.534063774   | -7.919640313 |
| C107  | 4.585944560  | 3.208614235   | -7.419524557 |
| C108  | 5.158337546  | 3.383408703   | -8.811483281 |
| C109  | -2.756032060 | -3.492103214  | -9.151730260 |
| C110  | -3.782036076 | -2.401049325  | -8.823746386 |
| C111  | -2.266926015 | -4.166177026  | -7.849909891 |
| C112  | -1.537796599 | -5.488869031  | -8.148547333 |
| C113  | -0.861898020 | -6.018404100  | -6.904130511 |
| C114  | -4.186387927 | -0.084991950  | -8.163289963 |
| C115  | -3.709730261 | 1.199240144   | -8.811475623 |
| C116  | -4.579860469 | 0.047102566   | -6.670613177 |
| C117  | -3.347582277 | 0.068440733   | -5.812127982 |
| C118  | -2.626642173 | 1.259810788   | -5.619879101 |
| C119  | -2.800340193 | -1.139720741  | -5.350578512 |
| C120  | -1.345420838 | 1.221764522   | -5.059816287 |
| C121  | -1.519571561 | -1.176855891  | -4.792039050 |
| C122  | -0.775573379 | 0.001984435   | -4.678949354 |
| C123  | 7.915813618  | -6.244287900  | -4.784407407 |
| C124  | 9.098834140  | -6.327171914  | -3.805851776 |
| C125  | 6.604834491  | -6.598275399  | -4.069244639 |
| C126  | 5.341845482  | -6.370134170  | -4.835925733 |
| C127  | 4.957971240  | -6.943929893  | -6.030387901 |
| C128  | 3.246604397  | -5.825106297  | -5.181961740 |
| C129  | 10.309192555 | -7.544774051  | -2.097501498 |
| C130  | 11.663645153 | -7.327184610  | -2.735445360 |
| C131  | 0.610260705  | -6.922582698  | -0.180064707 |
| C132  | 2.101496443  | -6.970296877  | 0.132962852  |
| C133  | 3.017678916  | -7.097629303  | -1.120634296 |
| C134  | 2.910490587  | -8.529890036  | -1.706390839 |
| C135  | 3.948391259  | -8.871308924  | -2.778558494 |
| C136  | 3.975993953  | -10.361903477 | -3.177424052 |
| C137  | 4.485915484  | -6.868998945  | -0.718003154 |
| C138  | 3.593783009  | -0.685878807  | -2.234725654 |
| Fe139 | 3.833510502  | -2.015591863  | -3.652382997 |
| Fe140 | 2.173620458  | 0.704806220   | -1.565097140 |
| Fe141 | 5.052530580  | 0.395312547   | -1.580575063 |
| Fe142 | 3.795831851  | 0.491434926   | -3.767511577 |
| Fe143 | 3.764682668  | 2.714488338   | -2.388838640 |
| Fe144 | 4.836563846  | -2.090761951  | -1.284154651 |
| Fe145 | 2.313990946  | -2.419951036  | -1.383991924 |
| H146  | -6.346282844 | -7.527039616  | 0.343763988  |
| H147  | -6.517276678 | -6.530150650  | -0.937365123 |
| H148  | -9.705068574 | -4.800894823  | 1.381965195  |
| H149  | -8.830772247 | -6.126215931  | -0.407486427 |
| H150  | -8.672569226 | -7.240581466  | 0.946217090  |
| H151  | -7.905618635 | -2.727265426  | 2.056041362  |
| H152  | -8.679099064 | -5.613247203  | 3.961327038  |
| H153  | -9.533685369 | -2.954050708  | 2.728178322  |
| H154  | -7.921307623 | -6.263867659  | 6.063678048  |
| H155  | -6.045387913 | -5.846450388  | 3.651024716  |
| H156  | -7.722137087 | -4.554064397  | 6.507738183  |
| H157  | -2.901752235 | -1.783973813  | 3.210286977  |
| H158  | -5.019057549 | -3.702396658  | 3.067758110  |
| H159  | -3.769342759 | -6.189038884  | 3.299949854  |
| H160  | -4.788131128 | -0.093364780  | 7.166430829  |

|      |               |              |               |
|------|---------------|--------------|---------------|
| H161 | -5.675421178  | -2.299731089 | 5.520788687   |
| H162 | -3.484517730  | -6.287245132 | 5.055842748   |
| H163 | -4.634846801  | -1.451232872 | 2.994741399   |
| H164 | -4.231673981  | -3.649019137 | 7.495610138   |
| H165 | -5.924822590  | -1.383842584 | 7.646430251   |
| H166 | -0.432408278  | -3.284595956 | 3.621879326   |
| H167 | -0.682290256  | -2.167627035 | 2.262724854   |
| H168 | 0.957373109   | -2.462164421 | 2.854107587   |
| H169 | -1.276095133  | -1.177471104 | 4.529132801   |
| H170 | -3.354615006  | -4.703712622 | 9.385657503   |
| H171 | -1.879393234  | 2.040956692  | 5.318672105   |
| H172 | -1.447432737  | -0.260357987 | 9.205634232   |
| H173 | -1.726238148  | 3.173880626  | 9.528689304   |
| H174 | 0.828113902   | 0.168173438  | 2.792173750   |
| H175 | 0.139535059   | 0.998108750  | 4.210298358   |
| H176 | 9.312541894   | 1.998185224  | 4.472196859   |
| H177 | -2.829245120  | 3.392889356  | 5.957432731   |
| H178 | -2.702813815  | 4.062233860  | 8.336582477   |
| H179 | -1.063192248  | 3.556306866  | 5.794518543   |
| H180 | -0.928035453  | 4.208641600  | 8.320384995   |
| H181 | -2.518545618  | 1.642409233  | 7.718546679   |
| H182 | 0.461280075   | 2.203866378  | 7.278388816   |
| H183 | -1.276246338  | 0.050794716  | 6.401499019   |
| H184 | -0.917426790  | 0.464515871  | 2.903471307   |
| H185 | 1.561101351   | 4.236646493  | 0.228655102   |
| H186 | 0.733492751   | 4.507430762  | 1.786980139   |
| H187 | 2.666558887   | 5.313045516  | 2.319196989   |
| H188 | 3.217217054   | 4.678781572  | 4.855461806   |
| H189 | 4.767019486   | 4.187441014  | 1.709772907   |
| H190 | 6.598311863   | 2.551107312  | 1.368978205   |
| H191 | 6.510512299   | 1.578649611  | 5.572308882   |
| H192 | -0.771170625  | -2.638856574 | 6.344790442   |
| H193 | 0.231661262   | -5.637685459 | 6.439052459   |
| H194 | 0.835663768   | -5.056713503 | 8.005112804   |
| H195 | -1.848560609  | -4.508250865 | 6.832790798   |
| H196 | -2.849577185  | -3.126010073 | 10.039375379  |
| H197 | 4.642363749   | 3.179528404  | 5.902948357   |
| H198 | 1.683855535   | -1.591921924 | 5.062639143   |
| H199 | -0.751754752  | 0.709084533  | 11.733617375  |
| H200 | -0.964041510  | -1.010787935 | 11.321444178  |
| H201 | 1.651468145   | -0.728257035 | 10.477886153  |
| H202 | 11.147963521  | -7.044871590 | 4.030369858   |
| H203 | -1.749835429  | -5.982549847 | -4.125553733  |
| H204 | 1.228779027   | -6.045550061 | -1.777975755  |
| H205 | -2.270733769  | -6.237649566 | -8.482617310  |
| H206 | -0.801567062  | -5.343425290 | -8.952110000  |
| H207 | -3.118921073  | -4.369370543 | -7.182518418  |
| H208 | -3.090991687  | 1.046560673  | -9.727011484  |
| H209 | -3.344959060  | -4.237600428 | -9.708045690  |
| H210 | -3.343108463  | -2.191802481 | -2.298785192  |
| H211 | -3.946051967  | -4.969764515 | -1.162651552  |
| H212 | -2.273656333  | -1.027684420 | -8.425372420  |
| H213 | -5.120092067  | -0.322715414 | -8.715210573  |
| H214 | -1.034163264  | -2.406936097 | -9.570571353  |
| H215 | -1.317232513  | -5.845965176 | -2.424186134  |
| H216 | -1.608131366  | -3.466014803 | -7.312776447  |
| H217 | -1.209250255  | -3.773850625 | -10.472667292 |
| H218 | -6.737076782  | -3.456591338 | -2.856274125  |
| H219 | -3.465005790  | -2.415857855 | -0.537092312  |
| H220 | 0.829854346   | -5.290825491 | -7.584383546  |
| H221 | -2.313347646  | -4.335448903 | -1.039479925  |
| H222 | -3.830297516  | 2.609660152  | 3.081242035   |
| H223 | -3.065309306  | 0.520786359  | 1.356254550   |
| H224 | -8.133248876  | 0.779074518  | 3.803793622   |
| H225 | -7.262045333  | -0.072136579 | 1.075780395   |
| H226 | -6.928899541  | 4.082769163  | 2.370528143   |
| H227 | -8.331179459  | 8.747203500  | 4.413922397   |
| H228 | -6.903979798  | 5.241247152  | 5.320415865   |
| H229 | -8.925718826  | 5.441546352  | 3.437983544   |
| H230 | -6.261376326  | 6.839286620  | 2.764509243   |
| H231 | -10.864914580 | 9.523869611  | 1.110505218   |
| H232 | -3.246562961  | 4.253494581  | 1.302911938   |
| H233 | -4.802927023  | 3.992337358  | 0.502471260   |
| H234 | -9.835874532  | 10.452604186 | 3.255770146   |
| H235 | -8.366435728  | 5.647072384  | 1.777305410   |
| H236 | -6.170187958  | 2.026384754  | 1.371758971   |
| H237 | -7.011179437  | -0.550755692 | 3.513848919   |
| H238 | -9.864429929  | 1.924741129  | -0.218077459  |
| H239 | -2.259435496  | 1.493060715  | -2.703870555  |
| H240 | -10.211497188 | 0.186817660  | -0.148730788  |

|      |              |               |               |
|------|--------------|---------------|---------------|
| H241 | 10.296290236 | 3.227778796   | 2.678878265   |
| H242 | 8.688147791  | 3.320664420   | 2.401220743   |
| H243 | 1.549816480  | 5.965474969   | -1.442676056  |
| H244 | -0.713052195 | 5.487830385   | 0.269314188   |
| H245 | 1.732548381  | 8.069911713   | 0.303577037   |
| H246 | -3.434947356 | 3.551930008   | -1.608497230  |
| H247 | -5.109868073 | 4.160761718   | -2.784943112  |
| H248 | -6.705878158 | 3.397591432   | -4.168901096  |
| H249 | -4.796881636 | 5.412743211   | -1.850904529  |
| H250 | -5.529436686 | 1.254427739   | -4.074138422  |
| H251 | -7.310622039 | 1.280587674   | -3.877076800  |
| H252 | -0.055656608 | 11.616080203  | -1.859565812  |
| H253 | -1.239034405 | 12.926816642  | -1.682536831  |
| H254 | -0.907850720 | 10.187083437  | -3.325508918  |
| H255 | -2.584434456 | 9.640688067   | -3.300472659  |
| H256 | -3.694637782 | 9.198549832   | -6.039741663  |
| H257 | -2.649381327 | 4.849855905   | -5.745438711  |
| H258 | -7.283596254 | 8.678231841   | -0.550880858  |
| H259 | -3.095934768 | 8.563104649   | 2.127878072   |
| H260 | -4.690696978 | 7.775879864   | -2.960599187  |
| H261 | 1.067516327  | 5.389970817   | -3.896800817  |
| H262 | 2.343586420  | 7.203942784   | -3.227858333  |
| H263 | -1.391906486 | 4.893908433   | -3.350663003  |
| H264 | -8.368337631 | -0.212225758  | -1.485673477  |
| H265 | 3.644855059  | 10.014433402  | -4.142665428  |
| H266 | -6.096953690 | -0.953692704  | -3.068924829  |
| H267 | 0.531991209  | 6.372197965   | -5.255845302  |
| H268 | -3.392362639 | 6.983410178   | 0.264870208   |
| H269 | 3.341520011  | 10.315707544  | -2.417880737  |
| H270 | -2.953388336 | 7.764824972   | -6.672652142  |
| H271 | -5.109981241 | 8.945522398   | -4.166876785  |
| H272 | -5.172093438 | -3.520338366  | -3.441003319  |
| H273 | -5.755193093 | -3.330611322  | -0.793720817  |
| H274 | -6.929913173 | 10.349027370  | 1.244120471   |
| H275 | -5.253736625 | 1.390836047   | -1.603378174  |
| H276 | -0.485382702 | 8.032812368   | -3.701129263  |
| H277 | -1.742168942 | 6.343099222   | -6.001901119  |
| H278 | -0.676224091 | 4.209961717   | -4.803765541  |
| H279 | -3.600249656 | 5.875773912   | -3.675264055  |
| H280 | 0.802399986  | 8.918248648   | 2.935854101   |
| H281 | -0.465682053 | 9.762226949   | 0.099855600   |
| H282 | -0.088165750 | 12.627380717  | 0.387679607   |
| H283 | 2.271609390  | 9.439075742   | 2.075538448   |
| H284 | -2.443762202 | 10.654201505  | 1.735981425   |
| H285 | 4.605560586  | -3.024180127  | -9.153971164  |
| H286 | 4.591161753  | -4.483251936  | -8.144082037  |
| H287 | 7.882640206  | -5.190455558  | -5.098624584  |
| H288 | 5.045311712  | -5.095727642  | -10.410866992 |
| H289 | 3.509296548  | -5.581796909  | -10.117482731 |
| H290 | 5.501365289  | 4.781190453   | -0.948564062  |
| H291 | 5.723855113  | 7.427799613   | 0.538850514   |
| H292 | 4.821633261  | 8.091126978   | -3.593633604  |
| H293 | 4.125061204  | 5.612702255   | -0.157923406  |
| H294 | 6.810857541  | 8.051944848   | -0.512777619  |
| H295 | 5.400401313  | 2.849006942   | -6.771451570  |
| H296 | 5.979094644  | 6.766543937   | -2.308776580  |
| H297 | 5.310291743  | -7.013432231  | 4.986644429   |
| H298 | 7.057270390  | -7.886891631  | 2.620648120   |
| H299 | 3.644164803  | 1.398523599   | -6.788625518  |
| H300 | 5.116248769  | -0.092316650  | 3.160257459   |
| H301 | 0.561395507  | 1.545100175   | -8.642960793  |
| H302 | -1.091868756 | -2.127771989  | -4.466895129  |
| H303 | 0.477961137  | 2.068476164   | -6.958035784  |
| H304 | 4.289553921  | -4.483924742  | 4.511719601   |
| H305 | 2.123579171  | 0.034655176   | -6.561251033  |
| H306 | 3.945991415  | -5.069674003  | 2.876592577   |
| H307 | 4.777835434  | -7.299007977  | 3.312401341   |
| H308 | 6.432150671  | -5.485618308  | 2.567602347   |
| H309 | 6.682491680  | -5.074039852  | 4.271123579   |
| H310 | -5.223496050 | -0.807514584  | -6.416543344  |
| H311 | 5.931526841  | -9.467592213  | 4.896870152   |
| H312 | 4.975030600  | -11.774400843 | 3.139289728   |
| H313 | 0.241253804  | -0.014635185  | -4.290650902  |
| H314 | 6.313612812  | -11.816869585 | 5.734723019   |
| H315 | 4.753957818  | -12.146910823 | 5.361942419   |
| H316 | 5.554135690  | -3.351028564  | 2.041912217   |
| H317 | -0.769045516 | 2.139925602   | -4.936009067  |
| H318 | -3.368428285 | -2.066569632  | -5.454652988  |
| H319 | 7.627862485  | -9.931256102  | -1.673353844  |
| H320 | 6.628065730  | -7.664225471  | -3.783414521  |

|       |              |               |              |
|-------|--------------|---------------|--------------|
| H321  | 6.628066063  | -8.173758933  | -0.104554344 |
| H322  | 6.762768560  | -10.533554762 | -2.818132122 |
| H323  | 4.937731712  | 2.549825803   | -9.520529632 |
| H324  | 6.391823676  | -5.072297238  | -0.255777961 |
| H325  | 2.293142754  | -7.785106601  | 0.841435250  |
| H326  | 3.28853828   | -2.023513146  | -7.601643890 |
| H327  | 3.026361291  | -9.227037983  | -0.861788456 |
| H328  | 3.038748783  | -6.896292858  | -6.982805254 |
| H329  | 2.240844707  | -5.440752732  | -5.068428214 |
| H330  | 6.581732336  | -12.424270008 | 3.489027106  |
| H331  | 5.788248790  | -1.099495898  | 1.920216868  |
| H332  | 8.365076529  | -5.791571447  | 0.797631928  |
| H333  | 7.250057384  | -3.782441703  | -0.161527954 |
| H334  | 8.970633556  | -6.853213163  | 2.798258924  |
| H335  | 3.704972319  | -2.686670019  | 5.108112194  |
| H336  | 3.741658388  | -8.286812110  | -3.688194604 |
| H337  | 4.955775502  | -8.590447774  | -2.443188386 |
| H338  | 1.894086795  | -8.670007714  | -2.104972689 |
| H339  | 1.357706737  | -2.158127384  | -6.134816034 |
| H340  | -3.056188056 | 2.205450797   | -5.959820107 |
| H341  | -5.171418732 | 0.969618197   | -6.572309806 |
| H342  | 2.327940496  | -6.020352327  | 0.646102070  |
| H343  | 8.509355258  | -7.326833995  | 0.584566955  |
| H344  | 7.415416437  | -9.247951094  | 0.670249876  |
| H345  | 4.138675895  | -1.015892011  | 5.050163968  |
| H346  | 5.501985078  | -7.579604351  | -6.717423485 |
| H347  | 6.553012030  | -6.041711334  | -3.126994832 |
| H348  | 0.464716895  | -2.948228731  | -7.468316610 |
| H349  | 4.262946628  | 4.188166744   | -7.035040194 |
| H350  | 7.771090747  | 0.153020539   | 3.951334905  |
| H351  | 7.805413133  | 0.565923948   | 2.222271509  |
| H352  | 8.983343921  | -6.763701127  | -6.456352282 |
| H353  | 8.257869386  | -8.041760493  | -5.734354694 |
| H354  | 10.303406145 | -8.560198346  | -1.671695036 |
| H355  | 8.561965961  | -8.234990576  | -3.108046815 |
| H356  | 11.705276564 | -7.556435022  | -3.827689762 |
| H357  | 10.174740911 | -6.838621390  | -1.262497097 |
| H358  | 10.549885952 | 0.327180127   | 2.195679205  |
| H359  | -2.982991757 | 13.202034252  | 3.726500560  |
| H360  | 10.213862513 | -6.862010246  | 5.538332874  |
| H361  | 9.552228895  | -4.443007353  | 4.397373615  |
| H362  | -4.712097213 | 12.321781568  | 1.405255811  |
| H363  | -4.094352738 | 10.304248382  | 3.651794670  |
| H364  | -5.684540635 | 10.999742033  | 3.291130285  |
| H365  | 1.273065962  | -3.306943825  | -0.748725084 |
| H366  | 3.871527819  | -1.331206530  | 0.108758901  |
| H367  | -6.450658669 | 6.810586633   | -1.565207287 |
| H368  | 0.310699829  | -0.923479146  | -0.321074048 |
| H369  | -2.097432634 | -0.269515189  | -0.880981320 |
| Mo370 | 3.885219744  | -4.430645697  | -2.388606864 |
| N371  | -7.025755163 | -7.186951741  | -0.340902258 |
| N372  | -8.775126786 | -4.630294800  | 1.757519082  |
| N373  | -8.124938821 | -4.932524442  | 4.475336444  |
| N374  | -5.445485745 | -5.789193630  | 4.475328659  |
| N375  | -4.216592169 | -3.384610170  | 3.608400489  |
| N376  | -4.890040235 | -1.748548613  | 5.876815850  |
| N377  | -3.654292743 | -3.076698317  | 8.117660271  |
| N378  | -1.111244602 | -4.464203360  | 7.542581212  |
| N379  | 0.221963770  | -2.559253091  | 6.135043612  |
| N380  | -0.382089476 | 0.364783844   | 6.786342234  |
| N381  | -0.659098561 | 0.201284688   | 9.666330597  |
| N382  | 5.527992178  | -11.514071788 | 5.154161193  |
| N383  | 6.386241361  | -9.261002448  | 4.001320053  |
| N384  | 5.071499079  | -3.310865083  | 2.943127871  |
| N385  | 4.275226340  | -1.951808249  | 4.678442131  |
| N386  | 5.388368674  | -1.023873211  | 2.860654281  |
| N387  | 9.042337203  | -6.966582899  | 3.833738390  |
| N388  | -5.853639018 | -2.945652620  | -2.911396894 |
| N389  | -1.945556615 | -5.597689193  | -3.195158618 |
| N390  | -6.080706389 | -0.443667162  | -2.169403009 |
| N391  | -8.351864647 | 0.652368363   | -0.949021797 |
| N392  | -7.848237879 | 0.355296963   | 1.800118290  |
| N393  | -5.687430334 | 2.093224661   | 2.272581185  |
| N394  | -3.129623845 | 2.681580088   | -1.101274287 |
| N395  | -2.522387297 | 0.647158716   | -0.730662666 |
| N396  | -6.320751533 | 4.731921733   | 2.863536900  |
| N397  | -9.768941838 | 7.728673932   | 1.588086451  |
| N398  | -9.670545378 | 9.513844102   | 2.902174898  |
| N399  | 9.479411583  | 2.671461180   | 2.415684989  |
| N400  | 6.288318188  | 7.201454341   | -0.286365863 |

|      |              |               |               |
|------|--------------|---------------|---------------|
| N401 | 4.212120761  | 8.462975678   | -2.869828957  |
| N402 | 1.556735116  | 7.851706338   | -3.344904296  |
| N403 | -3.174021995 | 6.404883826   | -4.457303446  |
| N404 | -3.371748972 | 8.248649170   | -5.886671347  |
| N405 | -4.453945987 | 8.241030318   | -3.840446807  |
| N406 | 0.657059810  | 6.328753750   | -1.070677023  |
| N407 | 0.972698845  | 8.225391013   | 0.972435861   |
| N408 | -0.372045050 | 10.613909397  | 0.652742006   |
| N409 | -1.884624509 | 10.332801111  | -3.039921495  |
| N410 | -2.753425400 | 11.622383206  | 1.706301043   |
| N411 | 4.096842931  | -4.752638126  | -10.243312114 |
| N412 | 2.469551529  | -2.580592533  | -7.859905477  |
| N413 | 1.431547774  | 0.221469864   | -7.305872910  |
| N414 | 3.507173420  | 2.233788777   | -7.364249517  |
| N415 | -1.721072787 | -2.989666455  | -10.063573610 |
| N416 | -3.285686312 | -1.178819767  | -8.473580820  |
| N417 | 8.118864804  | -7.060308965  | -5.994530382  |
| N418 | 4.256152115  | -5.659716147  | -4.327556967  |
| N419 | 3.642096550  | -6.586791256  | -6.225905226  |
| N420 | 9.232258978  | -7.462547185  | -3.068211715  |
| N421 | 0.058180258  | 2.234369483   | -0.181075573  |
| N422 | 2.631378682  | -1.340209585  | 0.289363663   |
| N423 | 0.891689445  | 1.695566075   | -0.718045495  |
| N424 | 2.105740522  | -0.854782485  | 1.208469952   |
| O425 | -6.555606898 | -5.125387187  | 1.626543700   |
| O426 | -7.278214433 | -2.814662097  | 4.501902088   |
| O427 | -5.285864821 | -5.204712394  | 6.676918814   |
| O428 | -2.461336782 | -3.977457971  | 4.936123896   |
| O429 | -3.059503405 | -0.504396738  | 5.369344506   |
| O430 | -3.279985624 | -0.980581935  | 8.962240836   |
| O431 | -0.538913568 | -3.982999724  | 9.706790430   |
| O432 | 2.190766174  | -3.755526158  | 6.111345441   |
| O433 | 1.897843608  | 0.250508835   | 6.659345695   |
| O434 | 0.853868954  | 1.894051472   | 9.698960330   |
| O435 | 1.548346343  | -0.262094351  | 12.460668858  |
| O436 | 7.048199530  | -10.325717963 | 2.058268616   |
| O437 | 8.024160821  | -7.687103202  | 5.765975577   |
| O438 | 11.583859863 | -4.532014158  | 4.543375644   |
| O439 | -5.609273104 | -0.838825771  | 0.040457285   |
| O440 | -3.693507833 | -4.394163356  | -4.013920958  |
| O441 | -7.127716874 | 2.500139056   | -0.397598653  |
| O442 | -6.335675812 | 3.048158905   | -3.338683781  |
| O443 | -9.778963740 | 1.496713898   | 2.287723194   |
| O444 | -5.653853211 | 1.524303292   | 4.484837410   |
| O445 | -4.256889728 | 5.047793028   | 3.788299142   |
| O446 | -6.573596787 | 7.256003502   | 5.333839404   |
| O447 | 10.781714714 | -0.077845759  | 4.183928687   |
| O448 | 3.557566043  | 4.687949508   | 3.941884085   |
| O449 | 3.609331552  | 8.391596710   | -0.672901465  |
| O450 | 0.990122371  | 10.074227711  | -3.525731426  |
| O451 | -1.403602268 | 7.204386164   | -1.529001758  |
| O452 | -0.691572882 | 7.178796111   | 2.156960288   |
| O453 | 2.426540000  | 5.686192681   | 1.446420257   |
| O454 | 0.851902030  | 11.614005200  | 2.310843263   |
| O455 | -2.512088631 | 13.589043099  | 0.578301814   |
| O456 | -3.264724792 | 11.004765264  | -1.346270798  |
| O457 | -4.957456076 | 13.710602217  | 3.624197426   |
| O458 | -5.504789876 | 6.838568271   | -1.322625289  |
| O459 | 1.757772713  | -4.571550796  | -8.758533412  |
| O460 | -0.250379369 | -0.745709956  | -8.528467455  |
| O461 | 2.119430474  | 3.589858498   | -8.547412564  |
| O462 | 5.844905977  | 4.337438609   | -9.137151254  |
| O463 | -5.002594482 | -2.628315618  | -8.856958946  |
| O464 | -1.463980891 | -6.605072181  | -6.011391461  |
| O465 | 0.458981109  | -5.774933857  | -6.782708511  |
| O466 | -4.009824291 | 2.321698151   | -8.428607351  |
| O467 | 9.934067698  | -5.406343204  | -3.713477247  |
| O468 | 12.662386745 | -6.992539660  | -2.115032418  |
| O469 | 0.291052517  | -6.274674747  | -1.310178379  |
| O470 | -0.249649535 | -7.386209798  | 0.566165110   |
| O471 | 5.129376874  | -10.894727825 | -3.351211387  |
| O472 | 2.867859309  | -10.948182344 | -3.333182750  |
| O473 | 5.134377633  | -5.944040958  | -1.376140618  |
| O474 | 5.012107111  | -7.574625222  | 0.163506326   |
| O475 | 2.617585111  | -6.105735770  | -2.066308065  |
| O476 | 8.949083307  | -6.552434122  | 1.035195975   |
| O477 | 6.987416803  | -4.567901594  | 0.354878270   |
| O478 | -4.377921978 | 4.747996525   | -2.452482931  |
| O479 | 7.714385344  | -10.426343096 | -2.518261290  |
| O480 | 7.515363871  | -8.624974154  | -0.093681844  |



|                                    |                                    |               |               |              |
|------------------------------------|------------------------------------|---------------|---------------|--------------|
|                                    | S481                               | 3.573660744   | 4.965942715   | -2.424439815 |
|                                    | S482                               | 2.064332575   | 1.906986455   | -3.511813448 |
|                                    | S483                               | 2.048876834   | -3.357385458  | -3.415204093 |
|                                    | S484                               | 3.803181949   | 1.736612385   | -0.363328648 |
|                                    | S485                               | 0.560836879   | -1.013419626  | -1.662052240 |
|                                    | S486                               | 4.017691186   | -0.814327263  | -5.516455742 |
|                                    | S487                               | 3.686410856   | -3.714123413  | -0.191184531 |
|                                    | S488                               | 5.587972692   | 1.738582151   | -3.284102124 |
|                                    | S489                               | 5.713909805   | -3.104013659  | -3.109350561 |
|                                    | S490                               | 6.503923103   | -0.813335061  | -0.547053935 |
|                                    | end                                |               |               |              |
| product <b>Fe6-NH-NH-a</b> (S=1/2) | <b>bm526n2nto6nhnha147ta.car_5</b> |               |               |              |
| Fe( 139) 2.461                     | C1                                 | -7.720508147  | -5.349580030  | 1.283776640  |
| Fe( 140) -1.040                    | C2                                 | -8.064739808  | -6.509010019  | 0.340976115  |
| Fe( 141) 1.764                     | C3                                 | -8.617737589  | -3.461151739  | 2.576094190  |
| Fe( 142) -2.305                    | C4                                 | -7.986555031  | -3.729263148  | 3.940446197  |
| Fe( 143) 2.402                     | C5                                 | -7.572345691  | -5.334918996  | 5.739455727  |
| Fe( 144) -2.171                    | C6                                 | -6.045776840  | -5.448642064  | 5.683220244  |
| Fe( 145) -0.246                    | C7                                 | -4.062225459  | -5.760825909  | 4.295762420  |
|                                    | C8                                 | -3.519132116  | -4.329732372  | 4.330877604  |
|                                    | C9                                 | -3.918529422  | -1.993344568  | 3.698106593  |
|                                    | C10                                | -3.927633799  | -1.385956285  | 5.108732143  |
|                                    | C11                                | -4.957817594  | -1.240505116  | 7.284971142  |
|                                    | C12                                | -3.878085202  | -1.807408108  | 8.219272975  |
|                                    | C13                                | -2.867953442  | -3.837533405  | 9.154077539  |
|                                    | C14                                | -1.391871947  | -4.100942930  | 8.823305343  |
|                                    | C15                                | 0.264189267   | -4.706657763  | 7.101061555  |
|                                    | C16                                | 0.989926333   | -3.573809022  | 6.369524412  |
|                                    | C17                                | 0.653165868   | -1.308176969  | 5.382962003  |
|                                    | C18                                | 0.778626071   | -0.100955328  | 6.327329848  |
|                                    | C19                                | -0.250243788  | -1.084620826  | 4.154501854  |
|                                    | C20                                | 0.021499162   | 0.279631281   | 3.510428407  |
|                                    | C21                                | -0.112445610  | -2.265286638  | 3.185004163  |
|                                    | C22                                | -0.386530518  | 1.611334129   | 7.648928091  |
|                                    | C23                                | -0.028638240  | 1.258755022   | 9.103373695  |
|                                    | C24                                | -1.724275640  | 2.377565977   | 7.517159603  |
|                                    | C25                                | -1.802832582  | 3.538206685   | 8.514632413  |
|                                    | C26                                | -1.911728783  | 2.892618961   | 6.083569102  |
|                                    | C27                                | -0.430472909  | -0.130648378  | 11.046906086 |
|                                    | C28                                | 1.034325723   | -0.403799646  | 11.324616876 |
|                                    | C29                                | 5.878889587   | -11.623684319 | 3.693440642  |
|                                    | C30                                | 6.518810584   | -10.345441515 | 3.164107263  |
|                                    | C31                                | 6.819531494   | -7.933926448  | 3.686933625  |
|                                    | C32                                | 8.047378776   | -7.546609206  | 4.530851294  |
|                                    | C33                                | 5.647787698   | -6.971307095  | 3.937825349  |
|                                    | C34                                | 5.988731458   | -5.531269635  | 3.566021211  |
|                                    | C35                                | 4.751656642   | -4.639288962  | 3.527967559  |
|                                    | C36                                | 4.882709144   | -2.134281513  | 3.507190270  |
|                                    | C37                                | 10.286983407  | -6.548942047  | 4.466426293  |
|                                    | C38                                | 10.467471395  | -5.047664217  | 4.462579916  |
|                                    | C39                                | -5.320432397  | -2.666375633  | -1.585838181 |
|                                    | C40                                | -5.691469802  | -1.234195441  | -1.155174530 |
|                                    | C41                                | -3.783831294  | -2.810117511  | -1.519131563 |
|                                    | C42                                | -3.233949149  | -4.247283308  | -1.628641520 |
|                                    | C43                                | -2.967689963  | -4.748182351  | -3.048457094 |
|                                    | C44                                | -6.174135213  | 1.003749545   | -2.064902726 |
|                                    | C45                                | -7.260066732  | 1.466832089   | -1.083249000 |
|                                    | C46                                | -6.349244150  | 1.611699897   | -3.462120831 |
|                                    | C47                                | -9.414907424  | 0.961186395   | -0.032598678 |
|                                    | C48                                | -9.016029974  | 0.967761433   | 1.446074393  |
|                                    | C49                                | -7.316409155  | 0.421519495   | 3.123840869  |
|                                    | C50                                | -6.134564158  | 1.367045425   | 3.342195957  |
|                                    | C51                                | -4.601129415  | 3.036380550   | 2.422564879  |
|                                    | C52                                | -5.029617602  | 4.353533363   | 3.114303692  |
|                                    | C53                                | -4.006223593  | 3.452756337   | 1.068739850  |
|                                    | C54                                | -3.381656587  | 2.382700395   | 0.233215551  |
|                                    | C55                                | -2.882738351  | 1.128781847   | 0.487043539  |
|                                    | C56                                | -2.515504128  | 1.568905596   | -1.660632518 |
|                                    | C57                                | -6.827871680  | 6.038207089   | 3.247753125  |
|                                    | C58                                | -6.713199723  | 6.204670027   | 4.761678001  |
|                                    | C59                                | -8.309547018  | 6.097494670   | 2.806391580  |
|                                    | C60                                | -8.924440979  | 7.461276160   | 2.683328965  |
|                                    | C61                                | -8.864105240  | 8.562090205   | 3.515850902  |
|                                    | C62                                | -10.157077171 | 8.987975621   | 1.767433075  |
|                                    | C63                                | 9.248778574   | 1.659280473   | 3.408735630  |
|                                    | C64                                | 10.295916603  | 0.574045721   | 3.237740771  |
|                                    | C65                                | 7.864153137   | 0.992963621   | 3.210863698  |
|                                    | C66                                | 6.716095750   | 1.953012904   | 3.416106585  |
|                                    | C67                                | 6.135508542   | 2.138652249   | 4.683269893  |
|                                    | C68                                | 6.204674012   | 2.704855620   | 2.342075314  |

|       |              |               |              |
|-------|--------------|---------------|--------------|
| C69   | 5.083174801  | 3.041322795   | 4.877528694  |
| C70   | 5.168257740  | 3.621119406   | 2.522976444  |
| C71   | 4.603994942  | 3.784583679   | 3.791206933  |
| C72   | 5.394295849  | 6.866216590   | -1.411810190 |
| C73   | 4.329110314  | 7.957904161   | -1.611372053 |
| C74   | 4.737160596  | 5.524560864   | -1.092236174 |
| C75   | 3.312826153  | 9.546567961   | -3.207610050 |
| C76   | 1.838433286  | 9.169374959   | -3.375587921 |
| C77   | 0.217102788  | 7.273866107   | -3.336329466 |
| C78   | -0.249234364 | 6.926931720   | -1.898881940 |
| C79   | 0.247863710  | 6.030909010   | -4.254656891 |
| C80   | -1.002798171 | 5.149495066   | -4.361199192 |
| C81   | -2.152013782 | 5.684978817   | -5.231623529 |
| C82   | -3.678615521 | 7.597790154   | -4.749904588 |
| C83   | 0.274237577  | 5.962107120   | 0.289977245  |
| C84   | 0.114524009  | 7.173832761   | 1.220151192  |
| C85   | 1.277041315  | 4.991965183   | 0.948612071  |
| C86   | 1.187083685  | 9.239610523   | 1.976387329  |
| C87   | 0.551492789  | 10.588863768  | 1.674716904  |
| C88   | -0.844613871 | 11.875795963  | 0.145094148  |
| C89   | -2.121924892 | 12.427645963  | 0.821455613  |
| C90   | -0.989773862 | 11.891170082  | -1.379236217 |
| C91   | -2.143368415 | 11.044181375  | -1.902946616 |
| C92   | -4.069323744 | 11.944763346  | 2.224860343  |
| C93   | -3.988221577 | 13.052202776  | 3.267506238  |
| C94   | -4.730917331 | 10.680831260  | 2.839610047  |
| C95   | -4.969488413 | 9.607388350   | 1.803081331  |
| C96   | -6.141128988 | 9.613902294   | 1.031467848  |
| C97   | -4.009261553 | 8.617453629   | 1.540402673  |
| C98   | -6.341296896 | 8.678540494   | 0.014850799  |
| C99   | -4.181000209 | 7.687443756   | 0.510491246  |
| C100  | -5.347429437 | 7.735042234   | -0.247063098 |
| C101  | 4.079718599  | -3.991982921  | -9.005398325 |
| C102  | 2.656379608  | -3.735486856  | -8.542763775 |
| C103  | 1.211243701  | -2.190168023  | -7.236395191 |
| C104  | 0.711734672  | -0.840087447  | -7.764077390 |
| C105  | 1.115841984  | 1.586028347   | -7.726758472 |
| C106  | 2.298676220  | 2.527991399   | -7.938785339 |
| C107  | 4.586971821  | 3.177560516   | -7.450950393 |
| C108  | 5.104987699  | 3.399656603   | -8.858428657 |
| C109  | -2.741368395 | -3.496023786  | -9.169460786 |
| C110  | -3.764711452 | -2.399396871  | -8.850716625 |
| C111  | -2.256541428 | -4.162313481  | -7.862203900 |
| C112  | -1.538119141 | -5.492976022  | -8.151002702 |
| C113  | -0.871208357 | -6.022565599  | -6.901567769 |
| C114  | -4.164736963 | -0.081307072  | -8.193391762 |
| C115  | -3.684027275 | 1.203978928   | -8.836995938 |
| C116  | -4.556152892 | 0.049470735   | -6.700498265 |
| C117  | -3.331450565 | 0.062440115   | -5.830470254 |
| C118  | -2.603743401 | 1.247977900   | -5.629203874 |
| C119  | -2.811818081 | -1.146857162  | -5.340111416 |
| C120  | -1.343036468 | 1.203058459   | -5.023712848 |
| C121  | -1.558388456 | -1.187831902  | -4.724505237 |
| C122  | -0.805884950 | -0.015566430  | -4.599077032 |
| C123  | 7.921736674  | -6.287665911  | -4.820793420 |
| C124  | 9.098677769  | -6.353764260  | -3.833275288 |
| C125  | 6.608048850  | -6.610244367  | -4.093335740 |
| C126  | 5.342730584  | -6.384308756  | -4.856615373 |
| C127  | 4.958462312  | -6.967058273  | -6.046708108 |
| C128  | 3.247203234  | -5.842205827  | -5.204078514 |
| C129  | 10.309656042 | -7.552954467  | -2.114095546 |
| C130  | 11.667112783 | -7.333912254  | -2.745945000 |
| C131  | 0.637474854  | -6.887374192  | -0.172172797 |
| C132  | 2.132474387  | -6.946346038  | 0.133728784  |
| C133  | 3.036461444  | -7.077578762  | -1.127576988 |
| C134  | 2.9348835609 | -8.518082478  | -1.700324228 |
| C135  | 3.970190496  | -8.873404665  | -2.771185378 |
| C136  | 3.995258026  | -10.367312309 | -3.163659186 |
| C137  | 4.503240580  | -6.828718526  | -0.740620291 |
| C138  | 3.599307486  | -0.688973111  | -2.244412332 |
| Fe139 | 3.820156190  | -2.004595659  | -3.733991682 |
| Fe140 | 2.040826007  | 0.674934990   | -1.714995742 |
| Fe141 | 5.001449596  | 0.433448119   | -1.510144480 |
| Fe142 | 3.841725576  | 0.523475897   | -3.749745668 |
| Fe143 | 3.738232253  | 2.734761613   | -2.396673464 |
| Fe144 | 4.869249726  | -2.070892494  | -1.422935801 |
| Fe145 | 2.285092403  | -2.234290080  | -1.298334223 |
| H146  | -6.273003593 | -7.487359510  | 0.377337557  |
| H147  | -6.449290091 | -6.502637402  | -0.913014595 |
| H148  | -9.712327163 | -4.832599911  | 1.357106989  |

|      |              |              |               |
|------|--------------|--------------|---------------|
| H149 | -8.778077227 | -6.148192734 | -0.417784928  |
| H150 | -8.614879311 | -7.252013347 | 0.944663764   |
| H151 | -7.978009847 | -2.718556618 | 2.076713604   |
| H152 | -8.744517295 | -5.632814685 | 3.959789198   |
| H153 | -9.603230779 | -3.002951073 | 2.736745110   |
| H154 | -7.989641583 | -6.299773038 | 6.055945164   |
| H155 | -6.098473758 | -5.868362709 | 3.664974181   |
| H156 | -7.801898607 | -4.593487059 | 6.515812760   |
| H157 | -2.916520022 | -1.825093460 | 3.284326475   |
| H158 | -5.074053437 | -3.707008322 | 3.133166310   |
| H159 | -3.827151781 | -6.221321551 | 3.326712008   |
| H160 | -4.812691252 | -0.152619433 | 7.253902707   |
| H161 | -5.706242315 | -2.329264241 | 5.574609051   |
| H162 | -3.550715576 | -6.326745704 | 5.083254872   |
| H163 | -4.641272730 | -1.459532920 | 3.065688526   |
| H164 | -4.263509274 | -3.714598891 | 7.535392547   |
| H165 | -5.944240275 | -1.453216568 | 7.720772238   |
| H166 | -0.430328347 | -3.205017819 | 3.656774787   |
| H167 | -0.750008632 | -2.117845117 | 2.298457897   |
| H168 | 0.923176664  | -2.381692798 | 2.835552556   |
| H169 | -1.287303814 | -1.068799307 | 4.516731506   |
| H170 | -3.335510042 | -4.811689786 | 9.362103873   |
| H171 | -1.925807280 | 2.077701520  | 5.347863775   |
| H172 | -1.465240276 | -0.251500015 | 9.186074241   |
| H173 | -1.762540798 | 3.198084575  | 9.559167936   |
| H174 | 1.047858407  | 0.357850666  | 3.132301380   |
| H175 | -0.158232036 | 1.100817136  | 4.217661419   |
| H176 | 9.308818997  | 2.014082833  | 4.455176332   |
| H177 | -2.865529320 | 3.431738062  | 5.992446038   |
| H178 | -2.746896657 | 4.083864280  | 8.370802752   |
| H179 | -1.100262894 | 3.589622382  | 5.816606401   |
| H180 | -0.973328388 | 4.245618830  | 8.355787308   |
| H181 | -2.541536939 | 1.668659904  | 7.743897333   |
| H182 | 0.434464123  | 2.264157864  | 7.315406499   |
| H183 | -1.280868000 | 0.089494515  | 6.424004600   |
| H184 | -0.655425881 | 0.436364186  | 2.656125722   |
| H185 | 1.566598687  | 4.227781924  | 0.212053382   |
| H186 | 0.748686290  | 4.494757820  | 1.775226631   |
| H187 | 2.675769202  | 5.313980280  | 2.300505795   |
| H188 | 3.222213223  | 4.674763207  | 4.825100278   |
| H189 | 4.777281763  | 4.191332034  | 1.679889625   |
| H190 | 6.612776198  | 2.558299628  | 1.339144211   |
| H191 | 6.504147605  | 1.563217139  | 5.537286032   |
| H192 | -0.743136722 | -2.537998493 | 6.419352205   |
| H193 | 0.257514274  | -5.577610412 | 6.429200781   |
| H194 | 0.857215629  | -4.967667691 | 7.987316799   |
| H195 | -1.831826225 | -4.444036389 | 6.814053648   |
| H196 | -2.871380224 | -3.247561940 | 10.078740708  |
| H197 | 4.634057835  | 3.162276408  | 5.867279840   |
| H198 | 1.675566513  | -1.507654093 | 5.042194356   |
| H199 | -0.779085229 | 0.651365160  | 11.740666528  |
| H200 | -0.981618403 | -1.056179374 | 11.274218206  |
| H201 | 1.630358275  | -0.745670352 | 10.446615919  |
| H202 | 11.168542753 | -7.021247311 | 4.006392619   |
| H203 | -1.728909882 | -5.976674554 | -4.119208832  |
| H204 | 1.267547179  | -6.025967627 | -1.777888974  |
| H205 | -2.276670692 | -6.236689428 | -8.484001092  |
| H206 | -0.797550635 | -5.357987140 | -8.952433849  |
| H207 | -3.109610147 | -4.354638889 | -7.193438114  |
| H208 | -3.043244781 | 1.055183684  | -9.737872827  |
| H209 | -3.332021763 | -4.243817799 | -9.721081347  |
| H210 | -3.334470414 | -2.180214871 | -2.304536733  |
| H211 | -3.938406139 | -4.958883379 | -1.164301692  |
| H212 | -2.253989980 | -1.030719803 | -8.446920683  |
| H213 | -5.099528695 | -0.314699380 | -8.745856770  |
| H214 | -1.018552709 | -2.415103951 | -9.594404145  |
| H215 | -1.285951294 | -5.814285331 | -2.422139659  |
| H216 | -1.593244744 | -3.463491485 | -7.329368945  |
| H217 | -1.188826668 | -3.793216208 | -10.480136848 |
| H218 | -6.730718862 | -3.444563685 | -2.879297818  |
| H219 | -3.461321105 | -2.400396777 | -0.550764320  |
| H220 | 0.823410366  | -5.294129690 | -7.570940266  |
| H221 | -2.306898794 | -4.320684814 | -1.042368469  |
| H222 | -3.836403638 | 2.588812834  | 3.072896350   |
| H223 | -2.881974564 | 0.536158740  | 1.393487907   |
| H224 | -8.126559628 | 0.764314366  | 3.782183714   |
| H225 | -7.257938889 | -0.068673729 | 1.047170457   |
| H226 | -6.926858623 | 4.078522913  | 2.385920667   |
| H227 | -8.336149557 | 8.747185932  | 4.444117838   |
| H228 | -6.860662220 | 5.253143885  | 5.329203854   |

|      |               |              |               |
|------|---------------|--------------|---------------|
| H229 | -8.908588602  | 5.455470551  | 3.476330819   |
| H230 | -6.248267368  | 6.836699371  | 2.758642843   |
| H231 | -10.817738422 | 9.540708199  | 1.105391240   |
| H232 | -3.242253997  | 4.219022528  | 1.278566574   |
| H233 | -4.793409021  | 3.943044589  | 0.474133642   |
| H234 | -9.819248744  | 10.459607491 | 3.269475377   |
| H235 | -8.371818028  | 5.642147778  | 1.805258114   |
| H236 | -6.181052977  | 2.026275964  | 1.365564060   |
| H237 | -7.019897885  | -0.576112694 | 3.480067259   |
| H238 | -9.846565981  | 1.951620097  | -0.235712673  |
| H239 | -2.174061853  | 1.472439796  | -2.688692654  |
| H240 | -10.209643174 | 0.216759479  | -0.172187907  |
| H241 | 10.291701395  | 3.259688808  | 2.669264027   |
| H242 | 8.683513621   | 3.342827495  | 2.390345261   |
| H243 | 1.555866232   | 5.978199181  | -1.444284298  |
| H244 | -0.708320892  | 5.469241497  | 0.258546990   |
| H245 | 1.727019694   | 8.056947677  | 0.309361163   |
| H246 | -3.471839146  | 3.477266268  | -1.626281241  |
| H247 | -5.113293201  | 4.165820664  | -2.798673738  |
| H248 | -6.690659584  | 3.396055893  | -4.202551450  |
| H249 | -4.786906169  | 5.399981186  | -1.846021739  |
| H250 | -5.521779075  | 1.255492325  | -4.097689991  |
| H251 | -7.303463938  | 1.280319098  | -3.899860588  |
| H252 | -0.035717176  | 11.606760644 | -1.844807137  |
| H253 | -1.202438478  | 12.931674827 | -1.671046252  |
| H254 | -0.905568325  | 10.213514568 | -3.342867636  |
| H255 | -2.591047745  | 9.699255967  | -3.338593202  |
| H256 | -3.752494992  | 9.162394961  | -6.070415050  |
| H257 | -2.648618089  | 4.851569320  | -5.751508145  |
| H258 | -7.264283055  | 8.688672523  | -0.570801935  |
| H259 | -3.102924945  | 8.548970960  | 2.147370054   |
| H260 | -4.667479004  | 7.786450119  | -2.952839887  |
| H261 | 1.071871771   | 5.388173949  | -3.905024876  |
| H262 | 2.345953937   | 7.202728654  | -3.230971523  |
| H263 | -1.384346530  | 4.878838512  | -3.364210997  |
| H264 | -8.361610091  | -0.202038793 | -1.499121050  |
| H265 | 3.647852518   | 10.016037422 | -4.142222277  |
| H266 | -6.079156532  | -0.948884828 | -3.090190714  |
| H267 | 0.535942923   | 6.372822945  | -5.262196634  |
| H268 | -3.394559617  | 6.966174399  | 0.284911193   |
| H269 | 3.343579524   | 10.308776941 | -2.415567444  |
| H270 | -3.040859218  | 7.720811709  | -6.703378883  |
| H271 | -5.110009302  | 8.939016435  | -4.168376898  |
| H272 | -5.162174568  | -3.525709829 | -3.450619622  |
| H273 | -5.753076171  | -3.327161740 | -0.811241794  |
| H274 | -6.916564643  | 10.358417427 | 1.226676364   |
| H275 | -5.242805766  | 1.391263873  | -1.628390728  |
| H276 | -0.482607529  | 8.029727888  | -3.706376563  |
| H277 | -1.742038937  | 6.347640390  | -6.004067764  |
| H278 | -0.670118290  | 4.210079317  | -4.824522871  |
| H279 | -3.588981403  | 5.874517149  | -3.669413575  |
| H280 | 0.789515753   | 8.895789601  | 2.942979439   |
| H281 | -0.462386138  | 9.756174861  | 0.105500743   |
| H282 | -0.075906841  | 12.619369929 | 0.406297052   |
| H283 | 2.265005134   | 9.414570044  | 2.092110409   |
| H284 | -2.439721065  | 10.645559878 | 1.737052289   |
| H285 | 4.597652417   | -3.036231732 | -9.171477030  |
| H286 | 4.583922790   | -4.484510130 | -8.146628531  |
| H287 | 7.897526064   | -5.241627971 | -5.160535640  |
| H288 | 5.033574141   | -5.122811186 | -10.406434186 |
| H289 | 3.497681938   | -5.604051635 | -10.104009184 |
| H290 | 5.528121095   | 4.774072433  | -0.971565007  |
| H291 | 5.763998009   | 7.436930441  | 0.511922617   |
| H292 | 4.830598995   | 8.097148967  | -3.602304316  |
| H293 | 4.163313249   | 5.606912598  | -0.158561944  |
| H294 | 6.826839760   | 8.067048350  | -0.559486341  |
| H295 | 5.422215090   | 2.786033579  | -6.849195624  |
| H296 | 5.984846466   | 6.762030447  | -2.335092938  |
| H297 | 5.344394843   | -7.040278065 | 4.995709160   |
| H298 | 7.080148705   | -7.912483271 | 2.620744671   |
| H299 | 3.639926377   | 1.363489527  | -6.839961931  |
| H300 | 5.116917320   | -0.108526709 | 3.224738302   |
| H301 | 0.552576005   | 1.543958643  | -8.666780911  |
| H302 | -1.155970832  | -2.132366129 | -4.351344635  |
| H303 | 0.463114221   | 2.075436660  | -6.983364200  |
| H304 | 4.330190228   | -4.512096085 | 4.531528556   |
| H305 | 2.099899484   | 0.045044968  | -6.567161444  |
| H306 | 3.970623660   | -5.095367644 | 2.898006776   |
| H307 | 4.803577376   | -7.324511985 | 3.324202104   |
| H308 | 6.455299606   | -5.514800139 | 2.569870742   |

|       |              |               |              |
|-------|--------------|---------------|--------------|
| H309  | 6.717678046  | -5.102755630  | 4.271544024  |
| H310  | -5.205905760 | -0.801250406  | -6.449489638 |
| H311  | 5.940969133  | -9.500825612  | 4.883485603  |
| H312  | 4.975216971  | -11.783611894 | 3.086150966  |
| H313  | 0.176642197  | -0.048491818  | -4.130442608 |
| H314  | 6.271039619  | -11.870119393 | 5.700224340  |
| H315  | 4.710245620  | -12.162062415 | 5.300245775  |
| H316  | 5.586694428  | -3.368133996  | 2.063959706  |
| H317  | -0.761771768 | 2.117150593   | -4.886983508 |
| H318  | -3.383744487 | -2.070038379  | -5.456004468 |
| H319  | 7.650512428  | -9.928230707  | -1.685260177 |
| H320  | 6.623389599  | -7.669619025  | -3.783537832 |
| H321  | 6.648744125  | -8.164597718  | -0.117544333 |
| H322  | 6.783734932  | -10.535256021 | -2.825194009 |
| H323  | 4.896740744  | 2.566540503   | -9.572000310 |
| H324  | 6.395752886  | -5.069115373  | -0.266159642 |
| H325  | 2.322872879  | -7.763273140  | 0.840712989  |
| H326  | 3.281054820  | -2.009579248  | -7.644326605 |
| H327  | 3.057583782  | -9.203947691  | -0.847210295 |
| H328  | 3.042941317  | -6.925039295  | -7.002494943 |
| H329  | 2.240026982  | -5.460025049  | -5.094752791 |
| H330  | 6.571110161  | -12.448940170 | 3.453275539  |
| H331  | 5.808389066  | -1.092033484  | 1.962444442  |
| H332  | 8.363411791  | -5.794694012  | 0.798633152  |
| H333  | 7.272559518  | -3.793392006  | -0.163436976 |
| H334  | 8.980231301  | -6.860810841  | 2.793247599  |
| H335  | 3.645684457  | -2.718837593  | 5.093388688  |
| H336  | 3.764991275  | -8.295899193  | -3.685435484 |
| H337  | 4.978952150  | -8.595024442  | -2.437769915 |
| H338  | 1.917204125  | -8.670913117  | -2.091039493 |
| H339  | 1.352242427  | -2.148539066  | -6.144366698 |
| H340  | -3.012418530 | 2.195719419   | -5.988325485 |
| H341  | -5.142531676 | 0.975136847   | -6.600652554 |
| H342  | 2.372311620  | -5.998027284  | 0.643944517  |
| H343  | 8.520457121  | -7.327392038  | 0.579319947  |
| H344  | 7.427593249  | -9.249231652  | 0.656234697  |
| H345  | 4.096759419  | -1.054626669  | 5.050487910  |
| H346  | 5.501692436  | -7.609237566  | -6.729233922 |
| H347  | 6.567006885  | -6.029802266  | -3.165250665 |
| H348  | 0.461577647  | -2.947718752  | -7.472570053 |
| H349  | 4.287381377  | 4.145365955   | -7.020050238 |
| H350  | 7.789783054  | 0.157895244   | 3.923381494  |
| H351  | 7.827590305  | 0.571763451   | 2.193474734  |
| H352  | 8.992669182  | -6.863440647  | -6.472013729 |
| H353  | 8.242403136  | -8.113005213  | -5.727319445 |
| H354  | 10.307520092 | -8.564985489  | -1.680550512 |
| H355  | 8.579780404  | -8.268883246  | -3.135875511 |
| H356  | 11.715856048 | -7.570934369  | -3.836498969 |
| H357  | 10.167592076 | -6.841068385  | -1.285313457 |
| H358  | 10.565945328 | 0.361668878   | 2.174676880  |
| H359  | -2.979561499 | 13.209272352  | 3.717041518  |
| H360  | 10.246537476 | -6.867237997  | 5.522946481  |
| H361  | 9.522594207  | -4.456258624  | 4.387195378  |
| H362  | -4.703440127 | 12.313519483  | 1.401274771  |
| H363  | -4.094376436 | 10.300975265  | 3.654096282  |
| H364  | -5.682275817 | 10.999458425  | 3.289400168  |
| H365  | 1.217970959  | -3.164905113  | -0.763528730 |
| H366  | 3.413173074  | -1.177080744  | 0.725008391  |
| H367  | -6.433511239 | 6.808647883   | -1.572416854 |
| H368  | 0.685248298  | -0.966479662  | 0.795963702  |
| H369  | -1.730006089 | -0.168411708  | -0.815449395 |
| Mo370 | 3.855845728  | -4.384864665  | -2.411184212 |
| N371  | -6.950921567 | -7.165677690  | -0.317630375 |
| N372  | -8.792047571 | -4.643556688  | 1.747115848  |
| N373  | -8.186657462 | -4.957236208  | 4.476562606  |
| N374  | -5.504517323 | -5.809834720  | 4.493231790  |
| N375  | -4.257057284 | -3.407186417  | 3.662231871  |
| N376  | -4.917645074 | -1.788760916  | 5.939532709  |
| N377  | -3.674761219 | -3.149856824  | 8.154317514  |
| N378  | -1.093417841 | -4.398699151  | 7.524005598  |
| N379  | 0.232956175  | -2.481209640  | 6.134939267  |
| N380  | -0.387700353 | 0.424955696   | 6.792734600  |
| N381  | -0.680965279 | 0.206400542   | 9.658783849  |
| N382  | 5.501242109  | -11.544722587 | 5.111134243  |
| N383  | 6.408020758  | -9.291138579  | 3.995097305  |
| N384  | 5.099001912  | -3.334460444  | 2.963179852  |
| N385  | 4.249851871  | -1.992499749  | 4.689646170  |
| N386  | 5.318545474  | -1.036133449  | 2.863684770  |
| N387  | 9.060642956  | -6.981100736  | 3.827379365  |
| N388  | -5.842746094 | -2.941032502  | -2.930485044 |

|      |              |               |               |
|------|--------------|---------------|---------------|
| N389 | -1.922136807 | -5.582964729  | -3.192009060  |
| N390 | -6.078541204 | -0.440417508  | -2.189902934  |
| N391 | -8.346374228 | 0.669013293   | -0.972759911  |
| N392 | -7.844528989 | 0.354803970   | 1.774447029   |
| N393 | -5.696558941 | 2.089312106   | 2.265445341   |
| N394 | -3.141959128 | 2.621039537   | -1.114529766  |
| N395 | -2.360735007 | 0.648735614   | -0.700938126  |
| N396 | -6.310648859 | 4.728979213   | 2.867457822   |
| N397 | -9.735012686 | 7.740896889   | 1.594252787   |
| N398 | -9.650811594 | 9.521691315   | 2.915155966   |
| N399 | 9.478965359  | 2.698623301   | 2.402551356   |
| N400 | 6.318790127  | 7.210820785   | -0.320062832  |
| N401 | 4.217065658  | 8.459543719   | -2.877351185  |
| N402 | 1.558658319  | 7.849610271   | -3.347626655  |
| N403 | -3.168554425 | 6.402902610   | -4.455927902  |
| N404 | -3.372631232 | 8.237134643   | -5.895820675  |
| N405 | -4.446641829 | 8.241406727   | -3.842218976  |
| N406 | 0.656847475  | 6.326502454   | -1.075717120  |
| N407 | 0.966749396  | 8.210155206   | 0.977845445   |
| N408 | -0.366025243 | 10.605715389  | 0.661088259   |
| N409 | -1.880015229 | 10.371319431  | -3.057007899  |
| N410 | -2.746192826 | 11.614918767  | 1.710578059   |
| N411 | 4.085525710  | -4.776825483  | -10.241405948 |
| N412 | 2.463807445  | -2.580274829  | -7.872535792  |
| N413 | 1.414312845  | 0.225030390   | -7.318455415  |
| N414 | 3.501484988  | 2.211254980   | -7.396687547  |
| N415 | -1.703016577 | -3.003880467  | -10.083889059 |
| N416 | -3.266402082 | -1.177501573  | -8.504200162  |
| N417 | 8.120138483  | -7.135415732  | -6.009758390  |
| N418 | 4.255881347  | -5.670709234  | -4.348766278  |
| N419 | 3.642936280  | -6.610925852  | -6.244383967  |
| N420 | 9.238625433  | -7.485918081  | -3.092053810  |
| N421 | 0.032939584  | 2.405847812   | -0.415349536  |
| N422 | 2.437443316  | -1.294071880  | 0.388123952   |
| N423 | 0.785064385  | 1.756409115   | -0.948006926  |
| N424 | 1.626142566  | -0.839237341  | 1.221316384   |
| O425 | -6.561310373 | -5.091951792  | 1.655644799   |
| O426 | -7.326447988 | -2.845035681  | 4.513351526   |
| O427 | -5.362591729 | -5.229722271  | 6.697333749   |
| O428 | -2.482273030 | -4.033164453  | 4.944506912   |
| O429 | -3.063831938 | -0.569278647  | 5.463594879   |
| O430 | -3.274441113 | -1.066450433  | 9.014312481   |
| O431 | -0.547815471 | -4.080872895  | 9.728261289   |
| O432 | 2.179925627  | -3.710068562  | 6.024500468   |
| O433 | 1.894162785  | 0.339400660   | 6.644984245   |
| O434 | 0.821463519  | 1.907071835   | 9.735782038   |
| O435 | 1.528843580  | -0.319393264  | 12.438319108  |
| O436 | 7.059798383  | -10.338563688 | 2.039698840   |
| O437 | 8.066941110  | -7.734325930  | 5.760118118   |
| O438 | 11.554731383 | -4.500148556  | 4.553443849   |
| O439 | -5.626959079 | -0.835427957  | 0.023573156   |
| O440 | -3.698787866 | -4.424929718  | -4.013283433  |
| O441 | -7.114126642 | 2.511288197   | -0.422917874  |
| O442 | -6.331225635 | 3.049922128   | -3.366303216  |
| O443 | -9.765097384 | 1.509958372   | 2.269869857   |
| O444 | -5.615451319 | 1.452695831   | 4.459113854   |
| O445 | -4.227184032 | 5.043718766   | 3.749552417   |
| O446 | -6.531807257 | 7.268035586   | 5.328871774   |
| O447 | 10.806276381 | -0.041258575  | 4.162309690   |
| O448 | 3.563162683  | 4.684911009   | 3.911758459   |
| O449 | 3.619775295  | 8.374267680   | -0.679278800  |
| O450 | 0.995242532  | 10.073227557  | -3.532672434  |
| O451 | -1.406952394 | 7.191206205   | -1.539240906  |
| O452 | -0.696817460 | 7.153949282   | 2.154935357   |
| O453 | 2.436927465  | 5.678427150   | 1.423892882   |
| O454 | 0.853505411  | 11.593493286  | 2.329869694   |
| O455 | -2.500664528 | 13.584330143  | 0.588550745   |
| O456 | -3.252138990 | 11.025058225  | -1.349542675  |
| O457 | -4.957261742 | 13.705415369  | 3.618526016   |
| O458 | -5.489351754 | 6.835453838   | -1.323198156  |
| O459 | 1.751719708  | -4.580522122  | -8.748038024  |
| O460 | -0.249411435 | -0.753147796  | -8.555841274  |
| O461 | 2.118458404  | 3.591662901   | -8.555110263  |
| O462 | 5.736726848  | 4.388002387   | -9.192941604  |
| O463 | -4.985896076 | -2.624152361  | -8.887843129  |
| O464 | -1.478572709 | -6.610429790  | -6.013261802  |
| O465 | 0.448733262  | -5.776882573  | -6.770535301  |
| O466 | -4.002427892 | 2.324694918   | -8.464402949  |
| O467 | 9.918095570  | -5.419872349  | -3.730280743  |
| O468 | 12.660866743 | -6.990561779  | -2.122708425  |

|      |              |               |              |
|------|--------------|---------------|--------------|
| O469 | 0.316792474  | -6.242397329  | -1.300409028 |
| O470 | -0.218352474 | -7.345452411  | 0.583003537  |
| O471 | 5.148440895  | -10.900849824 | -3.337667538 |
| O472 | 2.887206639  | -10.953709132 | -3.317183227 |
| O473 | 5.126802506  | -5.884503949  | -1.397033758 |
| O474 | 5.049975740  | -7.527784576  | 0.133784926  |
| O475 | 2.618009829  | -6.086985049  | -2.070854108 |
| O476 | 8.953756305  | -6.551627461  | 1.033889342  |
| O477 | 6.987609398  | -4.570273280  | 0.353244164  |
| O478 | -4.375609746 | 4.740364480   | -2.457693538 |
| O479 | 7.736943234  | -10.422122940 | -2.531057590 |
| O480 | 7.531625808  | -8.623085023  | -0.104589663 |
| S481 | 3.574632751  | 4.968832460   | -2.420151121 |
| S482 | 2.094578295  | 1.904421272   | -3.626234306 |
| S483 | 2.002490651  | -3.285006671  | -3.369402810 |
| S484 | 3.617876383  | 1.742650543   | -0.400428710 |
| S485 | 0.480246953  | -0.942183207  | -1.691619348 |
| S486 | 4.050698921  | -0.741368664  | -5.547995973 |
| S487 | 3.702951203  | -3.580941123  | -0.226211675 |
| S488 | 5.611415320  | 1.790833861   | -3.162183397 |
| S489 | 5.699419855  | -3.105404966  | -3.205703800 |
| S490 | 6.337645396  | -0.808824398  | -0.348022306 |
| end  |              |               |              |
